# Supplementary material for: Machine learning and metagenomics enhance surveillance of antimicrobial resistance in chicken production in China
Source: Research Square preprint supplement (doi:10.21203/rs.3.rs-2458989/v1), 2023-01-13
Supplement: Supplementary file 1 [file 2d408810f6654d476ade06d3.xlsx]

## Sheet: Planilha1
Antibiotic class	SD1-1	SD1-2	SD2	SD3	SD4	HN1	HN2	HN3	LN1	LN2	LN3
aminoglycosides	1	1	1	1	1	1	1	1	1	1	0
beta lactams	0	1	1	0	0	0	1	1	0	0	0
fluoroquinolone	0	0	0	0	0	1	0	0	0	1	0
lincosamide	0	0	0	0	1	0	0	1	0	0	0
MLSB	1	0	1	1	1	1	1	1	1	0	0
phenicols	1	0	1	1	1	1	0	1	1	1	1
tetracycline	0	0	0	0	1	1	0	0	0	0	0
in total	3	2	4	3	5	5	3	5	3	3	1
