# Supplementary material for: Machine learning and metagenomics enhance surveillance of antimicrobial resistance in chicken production in China
Source: Research Square preprint supplement (doi:10.21203/rs.3.rs-2458989/v1), 2023-01-13
Supplement: Supplementary file 2 [file 4cbd2a8dff45e291267e841d.xlsx]

## Sheet: Sheet1
Antibiotic	Abbreviation	Number of resistant isolates	Number of susceptible isolates
Amoxicillin/Clavulanic acid	AMC	57	48
Amikacin	AMI	27	141
Ampicillin	AMP	167	3
Ampicillin/Sulbactam	AMS	128	5
Aztreonam	AZM	134	26
Ceftazidime	CAZ	65	84
Ceftazidime/Clavulanic acid	CAZ-C	58	112
Cefoxitin	CFX	21	129
Cefazolin	CFZ	156	5
Chloramphenicol	CHL	151	16
Ciprofloxacin	CIP	158	8
Cefotaxime	CTX	145	24
Cefotaxime/Clavulanic acid	CTX-C	109	61
Doxycycline	DOX	98	6
Cefepime	FEP	99	32
Gentamicin	GEN	120	41
Imipenem	IMI	1	159
Kanamycin	KAN	142	28
Levofloxacin	LEV	155	7
Meropenem	MEM	1	166
Minocycline	MIN	23	116
Nalidixic acid	NAL	156	14
Streptomycin	STR	155	14
Sulphafurazole	SUL	157	13
Trimethoprim/Sulfamethoxazole	SXT	142	28
Tetracycline	TET	164	5
