# Supplementary material for: Machine learning and metagenomics enhance surveillance of antimicrobial resistance in chicken production in China
Source: Research Square preprint supplement (doi:10.21203/rs.3.rs-2458989/v1), 2023-01-13
Supplement: Supplementary file 3 [file 5e99a767cba3319376fd97f2.xlsx]

## Sheet: Place
Phylum	Farm 1	Farm 2	Adjusted p value (Holm correction)	Relation
Tenericutes	Shandong 1_1	Shandong 2	2.31219e-09	Increase
Tenericutes	Henan 3	Shandong 2	2.58451e-09	Increase
Tenericutes	Henan 2	Shandong 2	3.21815e-07	Increase
Tenericutes	Shandong 1_2	Shandong 2	5.2809e-07	Increase
Actinobacteria	Henan 3	Shandong 1_1	7.5648e-07	Decrease
Tenericutes	Liaoning 1	Shandong 2	9.9308e-06	Increase
Tenericutes	Liaoning 2	Shandong 2	2.46021e-05	Increase
Actinobacteria	Shandong 1_1	Shandong 4	2.52725e-05	Increase
Tenericutes	Henan 1	Shandong 2	4.13444e-05	Increase
Bacteroidetes	Henan 3	Shandong 2	4.51236e-05	Increase
Actinobacteria	Shandong 2	Shandong 4	0.000150274	Increase
Bacteroidetes	Liaoning 1	Shandong 2	0.00028201	Increase
Tenericutes	Shandong 2	Shandong 3	0.00125557	Decrease
Actinobacteria	Liaoning 2	Shandong 1_1	0.00153527	Decrease
Actinobacteria	Henan 3	Shandong 2	0.00163966	Decrease
Actinobacteria	Henan 3	Shandong 1_2	0.00208882	Decrease
Bacteroidetes	Shandong 2	Shandong 3	0.00235332	Decrease
Bacteroidetes	Liaoning 3	Shandong 2	0.00320645	Increase
Actinobacteria	Shandong 1_2	Shandong 4	0.00891606	Increase
Actinobacteria	Liaoning 3	Shandong 1_1	0.00982919	Decrease
Bacteroidetes	Shandong 1_1	Shandong 2	0.0144285	Increase
Actinobacteria	Henan 2	Shandong 1_1	0.0272382	Decrease
Actinobacteria	Liaoning 2	Shandong 1_2	0.0516573	-
Firmicutes	Shandong 2	Shandong 3	0.0720929	-
Bacteroidetes	Liaoning 2	Shandong 2	0.10493	-
Actinobacteria	Henan 2	Shandong 4	0.12325	-
Actinobacteria	Liaoning 3	Shandong 1_2	0.13683	-
Actinobacteria	Liaoning 3	Shandong 2	0.156405	-
Proteobacteria	Henan 1	Shandong 3	0.203355	-
Bacteroidetes	Henan 2	Liaoning 1	0.326011	-
Ascomycota	Shandong 1_1	Shandong 3	0.351243	-
Tenericutes	Liaoning 3	Shandong 2	0.375356	-
Bacteroidetes	Henan 1	Shandong 2	0.384702	-
Actinobacteria	Liaoning 1	Shandong 1_1	0.393948	-
Firmicutes	Shandong 3	Shandong 4	0.607275	-
Actinobacteria	Henan 2	Shandong 1_2	0.667869	-
Proteobacteria	Henan 1	Liaoning 2	0.702847	-
Actinobacteria	Liaoning 2	Shandong 2	0.86848	-
Ascomycota	Shandong 1_2	Shandong 3	0.927846	-
Euryarchaeota	Henan 1	Henan 1	1	-
Euryarchaeota	Henan 1	Henan 2	1	-
Euryarchaeota	Henan 1	Henan 3	1	-
Euryarchaeota	Henan 1	Liaoning 1	1	-
Euryarchaeota	Henan 1	Liaoning 2	1	-
Euryarchaeota	Henan 1	Liaoning 3	1	-
Euryarchaeota	Henan 1	Shandong 1_1	1	-
Euryarchaeota	Henan 1	Shandong 1_2	1	-
Euryarchaeota	Henan 1	Shandong 2	1	-
Euryarchaeota	Henan 1	Shandong 3	1	-
Euryarchaeota	Henan 1	Shandong 4	1	-
Euryarchaeota	Henan 2	Henan 2	1	-
Euryarchaeota	Henan 2	Henan 3	1	-
Euryarchaeota	Henan 2	Liaoning 1	1	-
Euryarchaeota	Henan 2	Liaoning 2	1	-
Euryarchaeota	Henan 2	Liaoning 3	1	-
Euryarchaeota	Henan 2	Shandong 1_1	1	-
Euryarchaeota	Henan 2	Shandong 1_2	1	-
Euryarchaeota	Henan 2	Shandong 2	1	-
Euryarchaeota	Henan 2	Shandong 3	1	-
Euryarchaeota	Henan 2	Shandong 4	1	-
Euryarchaeota	Henan 3	Henan 3	1	-
Euryarchaeota	Henan 3	Liaoning 1	1	-
Euryarchaeota	Henan 3	Liaoning 2	1	-
Euryarchaeota	Henan 3	Liaoning 3	1	-
Euryarchaeota	Henan 3	Shandong 1_1	1	-
Euryarchaeota	Henan 3	Shandong 1_2	1	-
Euryarchaeota	Henan 3	Shandong 2	1	-
Euryarchaeota	Henan 3	Shandong 3	1	-
Euryarchaeota	Henan 3	Shandong 4	1	-
Euryarchaeota	Liaoning 1	Liaoning 1	1	-
Euryarchaeota	Liaoning 1	Liaoning 2	1	-
Euryarchaeota	Liaoning 1	Liaoning 3	1	-
Euryarchaeota	Liaoning 1	Shandong 1_1	1	-
Euryarchaeota	Liaoning 1	Shandong 1_2	1	-
Euryarchaeota	Liaoning 1	Shandong 2	1	-
Euryarchaeota	Liaoning 1	Shandong 3	1	-
Euryarchaeota	Liaoning 1	Shandong 4	1	-
Euryarchaeota	Liaoning 2	Liaoning 2	1	-
Euryarchaeota	Liaoning 2	Liaoning 3	1	-
Euryarchaeota	Liaoning 2	Shandong 1_1	1	-
Euryarchaeota	Liaoning 2	Shandong 1_2	1	-
Euryarchaeota	Liaoning 2	Shandong 2	1	-
Euryarchaeota	Liaoning 2	Shandong 3	1	-
Euryarchaeota	Liaoning 2	Shandong 4	1	-
Euryarchaeota	Liaoning 3	Liaoning 3	1	-
Euryarchaeota	Liaoning 3	Shandong 1_1	1	-
Euryarchaeota	Liaoning 3	Shandong 1_2	1	-
Euryarchaeota	Liaoning 3	Shandong 2	1	-
Euryarchaeota	Liaoning 3	Shandong 3	1	-
Euryarchaeota	Liaoning 3	Shandong 4	1	-
Euryarchaeota	Shandong 1_1	Shandong 1_1	1	-
Euryarchaeota	Shandong 1_1	Shandong 1_2	1	-
Euryarchaeota	Shandong 1_1	Shandong 2	1	-
Euryarchaeota	Shandong 1_1	Shandong 3	1	-
Euryarchaeota	Shandong 1_1	Shandong 4	1	-
Euryarchaeota	Shandong 1_2	Shandong 1_2	1	-
Euryarchaeota	Shandong 1_2	Shandong 2	1	-
Euryarchaeota	Shandong 1_2	Shandong 3	1	-
Euryarchaeota	Shandong 1_2	Shandong 4	1	-
Euryarchaeota	Shandong 2	Shandong 2	1	-
Euryarchaeota	Shandong 2	Shandong 3	1	-
Euryarchaeota	Shandong 2	Shandong 4	1	-
Euryarchaeota	Shandong 3	Shandong 3	1	-
Euryarchaeota	Shandong 3	Shandong 4	1	-
Euryarchaeota	Shandong 4	Shandong 4	1	-
Thaumarchaeota	Henan 1	Henan 1	1	-
Thaumarchaeota	Henan 1	Henan 2	1	-
Thaumarchaeota	Henan 1	Henan 3	1	-
Thaumarchaeota	Henan 1	Liaoning 1	1	-
Thaumarchaeota	Henan 1	Liaoning 2	1	-
Thaumarchaeota	Henan 1	Liaoning 3	1	-
Thaumarchaeota	Henan 1	Shandong 1_1	1	-
Thaumarchaeota	Henan 1	Shandong 1_2	1	-
Thaumarchaeota	Henan 1	Shandong 2	1	-
Thaumarchaeota	Henan 1	Shandong 3	1	-
Thaumarchaeota	Henan 1	Shandong 4	1	-
Thaumarchaeota	Henan 2	Henan 2	1	-
Thaumarchaeota	Henan 2	Henan 3	1	-
Thaumarchaeota	Henan 2	Liaoning 1	1	-
Thaumarchaeota	Henan 2	Liaoning 2	1	-
Thaumarchaeota	Henan 2	Liaoning 3	1	-
Thaumarchaeota	Henan 2	Shandong 1_1	1	-
Thaumarchaeota	Henan 2	Shandong 1_2	1	-
Thaumarchaeota	Henan 2	Shandong 2	1	-
Thaumarchaeota	Henan 2	Shandong 3	1	-
Thaumarchaeota	Henan 2	Shandong 4	1	-
Thaumarchaeota	Henan 3	Henan 3	1	-
Thaumarchaeota	Henan 3	Liaoning 1	1	-
Thaumarchaeota	Henan 3	Liaoning 2	1	-
Thaumarchaeota	Henan 3	Liaoning 3	1	-
Thaumarchaeota	Henan 3	Shandong 1_1	1	-
Thaumarchaeota	Henan 3	Shandong 1_2	1	-
Thaumarchaeota	Henan 3	Shandong 2	1	-
Thaumarchaeota	Henan 3	Shandong 3	1	-
Thaumarchaeota	Henan 3	Shandong 4	1	-
Thaumarchaeota	Liaoning 1	Liaoning 1	1	-
Thaumarchaeota	Liaoning 1	Liaoning 2	1	-
Thaumarchaeota	Liaoning 1	Liaoning 3	1	-
Thaumarchaeota	Liaoning 1	Shandong 1_1	1	-
Thaumarchaeota	Liaoning 1	Shandong 1_2	1	-
Thaumarchaeota	Liaoning 1	Shandong 2	1	-
Thaumarchaeota	Liaoning 1	Shandong 3	1	-
Thaumarchaeota	Liaoning 1	Shandong 4	1	-
Thaumarchaeota	Liaoning 2	Liaoning 2	1	-
Thaumarchaeota	Liaoning 2	Liaoning 3	1	-
Thaumarchaeota	Liaoning 2	Shandong 1_1	1	-
Thaumarchaeota	Liaoning 2	Shandong 1_2	1	-
Thaumarchaeota	Liaoning 2	Shandong 2	1	-
Thaumarchaeota	Liaoning 2	Shandong 3	1	-
Thaumarchaeota	Liaoning 2	Shandong 4	1	-
Thaumarchaeota	Liaoning 3	Liaoning 3	1	-
Thaumarchaeota	Liaoning 3	Shandong 1_1	1	-
Thaumarchaeota	Liaoning 3	Shandong 1_2	1	-
Thaumarchaeota	Liaoning 3	Shandong 2	1	-
Thaumarchaeota	Liaoning 3	Shandong 3	1	-
Thaumarchaeota	Liaoning 3	Shandong 4	1	-
Thaumarchaeota	Shandong 1_1	Shandong 1_1	1	-
Thaumarchaeota	Shandong 1_1	Shandong 1_2	1	-
Thaumarchaeota	Shandong 1_1	Shandong 2	1	-
Thaumarchaeota	Shandong 1_1	Shandong 3	1	-
Thaumarchaeota	Shandong 1_1	Shandong 4	1	-
Thaumarchaeota	Shandong 1_2	Shandong 1_2	1	-
Thaumarchaeota	Shandong 1_2	Shandong 2	1	-
Thaumarchaeota	Shandong 1_2	Shandong 3	1	-
Thaumarchaeota	Shandong 1_2	Shandong 4	1	-
Thaumarchaeota	Shandong 2	Shandong 2	1	-
Thaumarchaeota	Shandong 2	Shandong 3	1	-
Thaumarchaeota	Shandong 2	Shandong 4	1	-
Thaumarchaeota	Shandong 3	Shandong 3	1	-
Thaumarchaeota	Shandong 3	Shandong 4	1	-
Thaumarchaeota	Shandong 4	Shandong 4	1	-
Actinobacteria	Henan 1	Henan 1	1	-
Actinobacteria	Henan 1	Henan 2	1	-
Actinobacteria	Henan 1	Henan 3	1	-
Actinobacteria	Henan 1	Liaoning 1	1	-
Actinobacteria	Henan 1	Liaoning 2	1	-
Actinobacteria	Henan 1	Liaoning 3	1	-
Actinobacteria	Henan 1	Shandong 1_1	1	-
Actinobacteria	Henan 1	Shandong 1_2	1	-
Actinobacteria	Henan 1	Shandong 2	1	-
Actinobacteria	Henan 1	Shandong 3	1	-
Actinobacteria	Henan 1	Shandong 4	1	-
Actinobacteria	Henan 2	Henan 2	1	-
Actinobacteria	Henan 2	Henan 3	1	-
Actinobacteria	Henan 2	Liaoning 1	1	-
Actinobacteria	Henan 2	Liaoning 2	1	-
Actinobacteria	Henan 2	Liaoning 3	1	-
Actinobacteria	Henan 2	Shandong 2	1	-
Actinobacteria	Henan 2	Shandong 3	1	-
Actinobacteria	Henan 3	Henan 3	1	-
Actinobacteria	Henan 3	Liaoning 1	1	-
Actinobacteria	Henan 3	Liaoning 2	1	-
Actinobacteria	Henan 3	Liaoning 3	1	-
Actinobacteria	Henan 3	Shandong 3	1	-
Actinobacteria	Henan 3	Shandong 4	1	-
Actinobacteria	Liaoning 1	Liaoning 1	1	-
Actinobacteria	Liaoning 1	Liaoning 2	1	-
Actinobacteria	Liaoning 1	Liaoning 3	1	-
Actinobacteria	Liaoning 1	Shandong 1_2	1	-
Actinobacteria	Liaoning 1	Shandong 2	1	-
Actinobacteria	Liaoning 1	Shandong 3	1	-
Actinobacteria	Liaoning 1	Shandong 4	1	-
Actinobacteria	Liaoning 2	Liaoning 2	1	-
Actinobacteria	Liaoning 2	Liaoning 3	1	-
Actinobacteria	Liaoning 2	Shandong 3	1	-
Actinobacteria	Liaoning 2	Shandong 4	1	-
Actinobacteria	Liaoning 3	Liaoning 3	1	-
Actinobacteria	Liaoning 3	Shandong 3	1	-
Actinobacteria	Liaoning 3	Shandong 4	1	-
Actinobacteria	Shandong 1_1	Shandong 1_1	1	-
Actinobacteria	Shandong 1_1	Shandong 1_2	1	-
Actinobacteria	Shandong 1_1	Shandong 2	1	-
Actinobacteria	Shandong 1_1	Shandong 3	1	-
Actinobacteria	Shandong 1_2	Shandong 1_2	1	-
Actinobacteria	Shandong 1_2	Shandong 2	1	-
Actinobacteria	Shandong 1_2	Shandong 3	1	-
Actinobacteria	Shandong 2	Shandong 2	1	-
Actinobacteria	Shandong 2	Shandong 3	1	-
Actinobacteria	Shandong 3	Shandong 3	1	-
Actinobacteria	Shandong 3	Shandong 4	1	-
Actinobacteria	Shandong 4	Shandong 4	1	-
Bacteroidetes	Henan 1	Henan 1	1	-
Bacteroidetes	Henan 1	Henan 2	1	-
Bacteroidetes	Henan 1	Henan 3	1	-
Bacteroidetes	Henan 1	Liaoning 1	1	-
Bacteroidetes	Henan 1	Liaoning 2	1	-
Bacteroidetes	Henan 1	Liaoning 3	1	-
Bacteroidetes	Henan 1	Shandong 1_1	1	-
Bacteroidetes	Henan 1	Shandong 1_2	1	-
Bacteroidetes	Henan 1	Shandong 3	1	-
Bacteroidetes	Henan 1	Shandong 4	1	-
Bacteroidetes	Henan 2	Henan 2	1	-
Bacteroidetes	Henan 2	Henan 3	1	-
Bacteroidetes	Henan 2	Liaoning 2	1	-
Bacteroidetes	Henan 2	Liaoning 3	1	-
Bacteroidetes	Henan 2	Shandong 1_1	1	-
Bacteroidetes	Henan 2	Shandong 1_2	1	-
Bacteroidetes	Henan 2	Shandong 2	1	-
Bacteroidetes	Henan 2	Shandong 3	1	-
Bacteroidetes	Henan 2	Shandong 4	1	-
Bacteroidetes	Henan 3	Henan 3	1	-
Bacteroidetes	Henan 3	Liaoning 1	1	-
Bacteroidetes	Henan 3	Liaoning 2	1	-
Bacteroidetes	Henan 3	Liaoning 3	1	-
Bacteroidetes	Henan 3	Shandong 1_1	1	-
Bacteroidetes	Henan 3	Shandong 1_2	1	-
Bacteroidetes	Henan 3	Shandong 3	1	-
Bacteroidetes	Henan 3	Shandong 4	1	-
Bacteroidetes	Liaoning 1	Liaoning 1	1	-
Bacteroidetes	Liaoning 1	Liaoning 2	1	-
Bacteroidetes	Liaoning 1	Liaoning 3	1	-
Bacteroidetes	Liaoning 1	Shandong 1_1	1	-
Bacteroidetes	Liaoning 1	Shandong 1_2	1	-
Bacteroidetes	Liaoning 1	Shandong 3	1	-
Bacteroidetes	Liaoning 1	Shandong 4	1	-
Bacteroidetes	Liaoning 2	Liaoning 2	1	-
Bacteroidetes	Liaoning 2	Liaoning 3	1	-
Bacteroidetes	Liaoning 2	Shandong 1_1	1	-
Bacteroidetes	Liaoning 2	Shandong 1_2	1	-
Bacteroidetes	Liaoning 2	Shandong 3	1	-
Bacteroidetes	Liaoning 2	Shandong 4	1	-
Bacteroidetes	Liaoning 3	Liaoning 3	1	-
Bacteroidetes	Liaoning 3	Shandong 1_1	1	-
Bacteroidetes	Liaoning 3	Shandong 1_2	1	-
Bacteroidetes	Liaoning 3	Shandong 3	1	-
Bacteroidetes	Liaoning 3	Shandong 4	1	-
Bacteroidetes	Shandong 1_1	Shandong 1_1	1	-
Bacteroidetes	Shandong 1_1	Shandong 1_2	1	-
Bacteroidetes	Shandong 1_1	Shandong 3	1	-
Bacteroidetes	Shandong 1_1	Shandong 4	1	-
Bacteroidetes	Shandong 1_2	Shandong 1_2	1	-
Bacteroidetes	Shandong 1_2	Shandong 2	1	-
Bacteroidetes	Shandong 1_2	Shandong 3	1	-
Bacteroidetes	Shandong 1_2	Shandong 4	1	-
Bacteroidetes	Shandong 2	Shandong 2	1	-
Bacteroidetes	Shandong 2	Shandong 4	1	-
Bacteroidetes	Shandong 3	Shandong 3	1	-
Bacteroidetes	Shandong 3	Shandong 4	1	-
Bacteroidetes	Shandong 4	Shandong 4	1	-
Candidatus_Melainabacteria	Henan 1	Henan 1	1	-
Candidatus_Melainabacteria	Henan 1	Henan 2	1	-
Candidatus_Melainabacteria	Henan 1	Henan 3	1	-
Candidatus_Melainabacteria	Henan 1	Liaoning 1	1	-
Candidatus_Melainabacteria	Henan 1	Liaoning 2	1	-
Candidatus_Melainabacteria	Henan 1	Liaoning 3	1	-
Candidatus_Melainabacteria	Henan 1	Shandong 1_1	1	-
Candidatus_Melainabacteria	Henan 1	Shandong 1_2	1	-
Candidatus_Melainabacteria	Henan 1	Shandong 2	1	-
Candidatus_Melainabacteria	Henan 1	Shandong 3	1	-
Candidatus_Melainabacteria	Henan 1	Shandong 4	1	-
Candidatus_Melainabacteria	Henan 2	Henan 2	1	-
Candidatus_Melainabacteria	Henan 2	Henan 3	1	-
Candidatus_Melainabacteria	Henan 2	Liaoning 1	1	-
Candidatus_Melainabacteria	Henan 2	Liaoning 2	1	-
Candidatus_Melainabacteria	Henan 2	Liaoning 3	1	-
Candidatus_Melainabacteria	Henan 2	Shandong 1_1	1	-
Candidatus_Melainabacteria	Henan 2	Shandong 1_2	1	-
Candidatus_Melainabacteria	Henan 2	Shandong 2	1	-
Candidatus_Melainabacteria	Henan 2	Shandong 3	1	-
Candidatus_Melainabacteria	Henan 2	Shandong 4	1	-
Candidatus_Melainabacteria	Henan 3	Henan 3	1	-
Candidatus_Melainabacteria	Henan 3	Liaoning 1	1	-
Candidatus_Melainabacteria	Henan 3	Liaoning 2	1	-
Candidatus_Melainabacteria	Henan 3	Liaoning 3	1	-
Candidatus_Melainabacteria	Henan 3	Shandong 1_1	1	-
Candidatus_Melainabacteria	Henan 3	Shandong 1_2	1	-
Candidatus_Melainabacteria	Henan 3	Shandong 2	1	-
Candidatus_Melainabacteria	Henan 3	Shandong 3	1	-
Candidatus_Melainabacteria	Henan 3	Shandong 4	1	-
Candidatus_Melainabacteria	Liaoning 1	Liaoning 1	1	-
Candidatus_Melainabacteria	Liaoning 1	Liaoning 2	1	-
Candidatus_Melainabacteria	Liaoning 1	Liaoning 3	1	-
Candidatus_Melainabacteria	Liaoning 1	Shandong 1_1	1	-
Candidatus_Melainabacteria	Liaoning 1	Shandong 1_2	1	-
Candidatus_Melainabacteria	Liaoning 1	Shandong 2	1	-
Candidatus_Melainabacteria	Liaoning 1	Shandong 3	1	-
Candidatus_Melainabacteria	Liaoning 1	Shandong 4	1	-
Candidatus_Melainabacteria	Liaoning 2	Liaoning 2	1	-
Candidatus_Melainabacteria	Liaoning 2	Liaoning 3	1	-
Candidatus_Melainabacteria	Liaoning 2	Shandong 1_1	1	-
Candidatus_Melainabacteria	Liaoning 2	Shandong 1_2	1	-
Candidatus_Melainabacteria	Liaoning 2	Shandong 2	1	-
Candidatus_Melainabacteria	Liaoning 2	Shandong 3	1	-
Candidatus_Melainabacteria	Liaoning 2	Shandong 4	1	-
Candidatus_Melainabacteria	Liaoning 3	Liaoning 3	1	-
Candidatus_Melainabacteria	Liaoning 3	Shandong 1_1	1	-
Candidatus_Melainabacteria	Liaoning 3	Shandong 1_2	1	-
Candidatus_Melainabacteria	Liaoning 3	Shandong 2	1	-
Candidatus_Melainabacteria	Liaoning 3	Shandong 3	1	-
Candidatus_Melainabacteria	Liaoning 3	Shandong 4	1	-
Candidatus_Melainabacteria	Shandong 1_1	Shandong 1_1	1	-
Candidatus_Melainabacteria	Shandong 1_1	Shandong 1_2	1	-
Candidatus_Melainabacteria	Shandong 1_1	Shandong 2	1	-
Candidatus_Melainabacteria	Shandong 1_1	Shandong 3	1	-
Candidatus_Melainabacteria	Shandong 1_1	Shandong 4	1	-
Candidatus_Melainabacteria	Shandong 1_2	Shandong 1_2	1	-
Candidatus_Melainabacteria	Shandong 1_2	Shandong 2	1	-
Candidatus_Melainabacteria	Shandong 1_2	Shandong 3	1	-
Candidatus_Melainabacteria	Shandong 1_2	Shandong 4	1	-
Candidatus_Melainabacteria	Shandong 2	Shandong 2	1	-
Candidatus_Melainabacteria	Shandong 2	Shandong 3	1	-
Candidatus_Melainabacteria	Shandong 2	Shandong 4	1	-
Candidatus_Melainabacteria	Shandong 3	Shandong 3	1	-
Candidatus_Melainabacteria	Shandong 3	Shandong 4	1	-
Candidatus_Melainabacteria	Shandong 4	Shandong 4	1	-
Chlamydiae	Henan 1	Henan 1	1	-
Chlamydiae	Henan 1	Henan 2	1	-
Chlamydiae	Henan 1	Henan 3	1	-
Chlamydiae	Henan 1	Liaoning 1	1	-
Chlamydiae	Henan 1	Liaoning 2	1	-
Chlamydiae	Henan 1	Liaoning 3	1	-
Chlamydiae	Henan 1	Shandong 1_1	1	-
Chlamydiae	Henan 1	Shandong 1_2	1	-
Chlamydiae	Henan 1	Shandong 2	1	-
Chlamydiae	Henan 1	Shandong 3	1	-
Chlamydiae	Henan 1	Shandong 4	1	-
Chlamydiae	Henan 2	Henan 2	1	-
Chlamydiae	Henan 2	Henan 3	1	-
Chlamydiae	Henan 2	Liaoning 1	1	-
Chlamydiae	Henan 2	Liaoning 2	1	-
Chlamydiae	Henan 2	Liaoning 3	1	-
Chlamydiae	Henan 2	Shandong 1_1	1	-
Chlamydiae	Henan 2	Shandong 1_2	1	-
Chlamydiae	Henan 2	Shandong 2	1	-
Chlamydiae	Henan 2	Shandong 3	1	-
Chlamydiae	Henan 2	Shandong 4	1	-
Chlamydiae	Henan 3	Henan 3	1	-
Chlamydiae	Henan 3	Liaoning 1	1	-
Chlamydiae	Henan 3	Liaoning 2	1	-
Chlamydiae	Henan 3	Liaoning 3	1	-
Chlamydiae	Henan 3	Shandong 1_1	1	-
Chlamydiae	Henan 3	Shandong 1_2	1	-
Chlamydiae	Henan 3	Shandong 2	1	-
Chlamydiae	Henan 3	Shandong 3	1	-
Chlamydiae	Henan 3	Shandong 4	1	-
Chlamydiae	Liaoning 1	Liaoning 1	1	-
Chlamydiae	Liaoning 1	Liaoning 2	1	-
Chlamydiae	Liaoning 1	Liaoning 3	1	-
Chlamydiae	Liaoning 1	Shandong 1_1	1	-
Chlamydiae	Liaoning 1	Shandong 1_2	1	-
Chlamydiae	Liaoning 1	Shandong 2	1	-
Chlamydiae	Liaoning 1	Shandong 3	1	-
Chlamydiae	Liaoning 1	Shandong 4	1	-
Chlamydiae	Liaoning 2	Liaoning 2	1	-
Chlamydiae	Liaoning 2	Liaoning 3	1	-
Chlamydiae	Liaoning 2	Shandong 1_1	1	-
Chlamydiae	Liaoning 2	Shandong 1_2	1	-
Chlamydiae	Liaoning 2	Shandong 2	1	-
Chlamydiae	Liaoning 2	Shandong 3	1	-
Chlamydiae	Liaoning 2	Shandong 4	1	-
Chlamydiae	Liaoning 3	Liaoning 3	1	-
Chlamydiae	Liaoning 3	Shandong 1_1	1	-
Chlamydiae	Liaoning 3	Shandong 1_2	1	-
Chlamydiae	Liaoning 3	Shandong 2	1	-
Chlamydiae	Liaoning 3	Shandong 3	1	-
Chlamydiae	Liaoning 3	Shandong 4	1	-
Chlamydiae	Shandong 1_1	Shandong 1_1	1	-
Chlamydiae	Shandong 1_1	Shandong 1_2	1	-
Chlamydiae	Shandong 1_1	Shandong 2	1	-
Chlamydiae	Shandong 1_1	Shandong 3	1	-
Chlamydiae	Shandong 1_1	Shandong 4	1	-
Chlamydiae	Shandong 1_2	Shandong 1_2	1	-
Chlamydiae	Shandong 1_2	Shandong 2	1	-
Chlamydiae	Shandong 1_2	Shandong 3	1	-
Chlamydiae	Shandong 1_2	Shandong 4	1	-
Chlamydiae	Shandong 2	Shandong 2	1	-
Chlamydiae	Shandong 2	Shandong 3	1	-
Chlamydiae	Shandong 2	Shandong 4	1	-
Chlamydiae	Shandong 3	Shandong 3	1	-
Chlamydiae	Shandong 3	Shandong 4	1	-
Chlamydiae	Shandong 4	Shandong 4	1	-
Chloroflexi	Henan 1	Henan 1	1	-
Chloroflexi	Henan 1	Henan 2	1	-
Chloroflexi	Henan 1	Henan 3	1	-
Chloroflexi	Henan 1	Liaoning 1	1	-
Chloroflexi	Henan 1	Liaoning 2	1	-
Chloroflexi	Henan 1	Liaoning 3	1	-
Chloroflexi	Henan 1	Shandong 1_1	1	-
Chloroflexi	Henan 1	Shandong 1_2	1	-
Chloroflexi	Henan 1	Shandong 2	1	-
Chloroflexi	Henan 1	Shandong 3	1	-
Chloroflexi	Henan 1	Shandong 4	1	-
Chloroflexi	Henan 2	Henan 2	1	-
Chloroflexi	Henan 2	Henan 3	1	-
Chloroflexi	Henan 2	Liaoning 1	1	-
Chloroflexi	Henan 2	Liaoning 2	1	-
Chloroflexi	Henan 2	Liaoning 3	1	-
Chloroflexi	Henan 2	Shandong 1_1	1	-
Chloroflexi	Henan 2	Shandong 1_2	1	-
Chloroflexi	Henan 2	Shandong 2	1	-
Chloroflexi	Henan 2	Shandong 3	1	-
Chloroflexi	Henan 2	Shandong 4	1	-
Chloroflexi	Henan 3	Henan 3	1	-
Chloroflexi	Henan 3	Liaoning 1	1	-
Chloroflexi	Henan 3	Liaoning 2	1	-
Chloroflexi	Henan 3	Liaoning 3	1	-
Chloroflexi	Henan 3	Shandong 1_1	1	-
Chloroflexi	Henan 3	Shandong 1_2	1	-
Chloroflexi	Henan 3	Shandong 2	1	-
Chloroflexi	Henan 3	Shandong 3	1	-
Chloroflexi	Henan 3	Shandong 4	1	-
Chloroflexi	Liaoning 1	Liaoning 1	1	-
Chloroflexi	Liaoning 1	Liaoning 2	1	-
Chloroflexi	Liaoning 1	Liaoning 3	1	-
Chloroflexi	Liaoning 1	Shandong 1_1	1	-
Chloroflexi	Liaoning 1	Shandong 1_2	1	-
Chloroflexi	Liaoning 1	Shandong 2	1	-
Chloroflexi	Liaoning 1	Shandong 3	1	-
Chloroflexi	Liaoning 1	Shandong 4	1	-
Chloroflexi	Liaoning 2	Liaoning 2	1	-
Chloroflexi	Liaoning 2	Liaoning 3	1	-
Chloroflexi	Liaoning 2	Shandong 1_1	1	-
Chloroflexi	Liaoning 2	Shandong 1_2	1	-
Chloroflexi	Liaoning 2	Shandong 2	1	-
Chloroflexi	Liaoning 2	Shandong 3	1	-
Chloroflexi	Liaoning 2	Shandong 4	1	-
Chloroflexi	Liaoning 3	Liaoning 3	1	-
Chloroflexi	Liaoning 3	Shandong 1_1	1	-
Chloroflexi	Liaoning 3	Shandong 1_2	1	-
Chloroflexi	Liaoning 3	Shandong 2	1	-
Chloroflexi	Liaoning 3	Shandong 3	1	-
Chloroflexi	Liaoning 3	Shandong 4	1	-
Chloroflexi	Shandong 1_1	Shandong 1_1	1	-
Chloroflexi	Shandong 1_1	Shandong 1_2	1	-
Chloroflexi	Shandong 1_1	Shandong 2	1	-
Chloroflexi	Shandong 1_1	Shandong 3	1	-
Chloroflexi	Shandong 1_1	Shandong 4	1	-
Chloroflexi	Shandong 1_2	Shandong 1_2	1	-
Chloroflexi	Shandong 1_2	Shandong 2	1	-
Chloroflexi	Shandong 1_2	Shandong 3	1	-
Chloroflexi	Shandong 1_2	Shandong 4	1	-
Chloroflexi	Shandong 2	Shandong 2	1	-
Chloroflexi	Shandong 2	Shandong 3	1	-
Chloroflexi	Shandong 2	Shandong 4	1	-
Chloroflexi	Shandong 3	Shandong 3	1	-
Chloroflexi	Shandong 3	Shandong 4	1	-
Chloroflexi	Shandong 4	Shandong 4	1	-
Cyanobacteria	Henan 1	Henan 1	1	-
Cyanobacteria	Henan 1	Henan 2	1	-
Cyanobacteria	Henan 1	Henan 3	1	-
Cyanobacteria	Henan 1	Liaoning 1	1	-
Cyanobacteria	Henan 1	Liaoning 2	1	-
Cyanobacteria	Henan 1	Liaoning 3	1	-
Cyanobacteria	Henan 1	Shandong 1_1	1	-
Cyanobacteria	Henan 1	Shandong 1_2	1	-
Cyanobacteria	Henan 1	Shandong 2	1	-
Cyanobacteria	Henan 1	Shandong 3	1	-
Cyanobacteria	Henan 1	Shandong 4	1	-
Cyanobacteria	Henan 2	Henan 2	1	-
Cyanobacteria	Henan 2	Henan 3	1	-
Cyanobacteria	Henan 2	Liaoning 1	1	-
Cyanobacteria	Henan 2	Liaoning 2	1	-
Cyanobacteria	Henan 2	Liaoning 3	1	-
Cyanobacteria	Henan 2	Shandong 1_1	1	-
Cyanobacteria	Henan 2	Shandong 1_2	1	-
Cyanobacteria	Henan 2	Shandong 2	1	-
Cyanobacteria	Henan 2	Shandong 3	1	-
Cyanobacteria	Henan 2	Shandong 4	1	-
Cyanobacteria	Henan 3	Henan 3	1	-
Cyanobacteria	Henan 3	Liaoning 1	1	-
Cyanobacteria	Henan 3	Liaoning 2	1	-
Cyanobacteria	Henan 3	Liaoning 3	1	-
Cyanobacteria	Henan 3	Shandong 1_1	1	-
Cyanobacteria	Henan 3	Shandong 1_2	1	-
Cyanobacteria	Henan 3	Shandong 2	1	-
Cyanobacteria	Henan 3	Shandong 3	1	-
Cyanobacteria	Henan 3	Shandong 4	1	-
Cyanobacteria	Liaoning 1	Liaoning 1	1	-
Cyanobacteria	Liaoning 1	Liaoning 2	1	-
Cyanobacteria	Liaoning 1	Liaoning 3	1	-
Cyanobacteria	Liaoning 1	Shandong 1_1	1	-
Cyanobacteria	Liaoning 1	Shandong 1_2	1	-
Cyanobacteria	Liaoning 1	Shandong 2	1	-
Cyanobacteria	Liaoning 1	Shandong 3	1	-
Cyanobacteria	Liaoning 1	Shandong 4	1	-
Cyanobacteria	Liaoning 2	Liaoning 2	1	-
Cyanobacteria	Liaoning 2	Liaoning 3	1	-
Cyanobacteria	Liaoning 2	Shandong 1_1	1	-
Cyanobacteria	Liaoning 2	Shandong 1_2	1	-
Cyanobacteria	Liaoning 2	Shandong 2	1	-
Cyanobacteria	Liaoning 2	Shandong 3	1	-
Cyanobacteria	Liaoning 2	Shandong 4	1	-
Cyanobacteria	Liaoning 3	Liaoning 3	1	-
Cyanobacteria	Liaoning 3	Shandong 1_1	1	-
Cyanobacteria	Liaoning 3	Shandong 1_2	1	-
Cyanobacteria	Liaoning 3	Shandong 2	1	-
Cyanobacteria	Liaoning 3	Shandong 3	1	-
Cyanobacteria	Liaoning 3	Shandong 4	1	-
Cyanobacteria	Shandong 1_1	Shandong 1_1	1	-
Cyanobacteria	Shandong 1_1	Shandong 1_2	1	-
Cyanobacteria	Shandong 1_1	Shandong 2	1	-
Cyanobacteria	Shandong 1_1	Shandong 3	1	-
Cyanobacteria	Shandong 1_1	Shandong 4	1	-
Cyanobacteria	Shandong 1_2	Shandong 1_2	1	-
Cyanobacteria	Shandong 1_2	Shandong 2	1	-
Cyanobacteria	Shandong 1_2	Shandong 3	1	-
Cyanobacteria	Shandong 1_2	Shandong 4	1	-
Cyanobacteria	Shandong 2	Shandong 2	1	-
Cyanobacteria	Shandong 2	Shandong 3	1	-
Cyanobacteria	Shandong 2	Shandong 4	1	-
Cyanobacteria	Shandong 3	Shandong 3	1	-
Cyanobacteria	Shandong 3	Shandong 4	1	-
Cyanobacteria	Shandong 4	Shandong 4	1	-
Deinococcus_Thermus	Henan 1	Henan 1	1	-
Deinococcus_Thermus	Henan 1	Henan 2	1	-
Deinococcus_Thermus	Henan 1	Henan 3	1	-
Deinococcus_Thermus	Henan 1	Liaoning 1	1	-
Deinococcus_Thermus	Henan 1	Liaoning 2	1	-
Deinococcus_Thermus	Henan 1	Liaoning 3	1	-
Deinococcus_Thermus	Henan 1	Shandong 1_1	1	-
Deinococcus_Thermus	Henan 1	Shandong 1_2	1	-
Deinococcus_Thermus	Henan 1	Shandong 2	1	-
Deinococcus_Thermus	Henan 1	Shandong 3	1	-
Deinococcus_Thermus	Henan 1	Shandong 4	1	-
Deinococcus_Thermus	Henan 2	Henan 2	1	-
Deinococcus_Thermus	Henan 2	Henan 3	1	-
Deinococcus_Thermus	Henan 2	Liaoning 1	1	-
Deinococcus_Thermus	Henan 2	Liaoning 2	1	-
Deinococcus_Thermus	Henan 2	Liaoning 3	1	-
Deinococcus_Thermus	Henan 2	Shandong 1_1	1	-
Deinococcus_Thermus	Henan 2	Shandong 1_2	1	-
Deinococcus_Thermus	Henan 2	Shandong 2	1	-
Deinococcus_Thermus	Henan 2	Shandong 3	1	-
Deinococcus_Thermus	Henan 2	Shandong 4	1	-
Deinococcus_Thermus	Henan 3	Henan 3	1	-
Deinococcus_Thermus	Henan 3	Liaoning 1	1	-
Deinococcus_Thermus	Henan 3	Liaoning 2	1	-
Deinococcus_Thermus	Henan 3	Liaoning 3	1	-
Deinococcus_Thermus	Henan 3	Shandong 1_1	1	-
Deinococcus_Thermus	Henan 3	Shandong 1_2	1	-
Deinococcus_Thermus	Henan 3	Shandong 2	1	-
Deinococcus_Thermus	Henan 3	Shandong 3	1	-
Deinococcus_Thermus	Henan 3	Shandong 4	1	-
Deinococcus_Thermus	Liaoning 1	Liaoning 1	1	-
Deinococcus_Thermus	Liaoning 1	Liaoning 2	1	-
Deinococcus_Thermus	Liaoning 1	Liaoning 3	1	-
Deinococcus_Thermus	Liaoning 1	Shandong 1_1	1	-
Deinococcus_Thermus	Liaoning 1	Shandong 1_2	1	-
Deinococcus_Thermus	Liaoning 1	Shandong 2	1	-
Deinococcus_Thermus	Liaoning 1	Shandong 3	1	-
Deinococcus_Thermus	Liaoning 1	Shandong 4	1	-
Deinococcus_Thermus	Liaoning 2	Liaoning 2	1	-
Deinococcus_Thermus	Liaoning 2	Liaoning 3	1	-
Deinococcus_Thermus	Liaoning 2	Shandong 1_1	1	-
Deinococcus_Thermus	Liaoning 2	Shandong 1_2	1	-
Deinococcus_Thermus	Liaoning 2	Shandong 2	1	-
Deinococcus_Thermus	Liaoning 2	Shandong 3	1	-
Deinococcus_Thermus	Liaoning 2	Shandong 4	1	-
Deinococcus_Thermus	Liaoning 3	Liaoning 3	1	-
Deinococcus_Thermus	Liaoning 3	Shandong 1_1	1	-
Deinococcus_Thermus	Liaoning 3	Shandong 1_2	1	-
Deinococcus_Thermus	Liaoning 3	Shandong 2	1	-
Deinococcus_Thermus	Liaoning 3	Shandong 3	1	-
Deinococcus_Thermus	Liaoning 3	Shandong 4	1	-
Deinococcus_Thermus	Shandong 1_1	Shandong 1_1	1	-
Deinococcus_Thermus	Shandong 1_1	Shandong 1_2	1	-
Deinococcus_Thermus	Shandong 1_1	Shandong 2	1	-
Deinococcus_Thermus	Shandong 1_1	Shandong 3	1	-
Deinococcus_Thermus	Shandong 1_1	Shandong 4	1	-
Deinococcus_Thermus	Shandong 1_2	Shandong 1_2	1	-
Deinococcus_Thermus	Shandong 1_2	Shandong 2	1	-
Deinococcus_Thermus	Shandong 1_2	Shandong 3	1	-
Deinococcus_Thermus	Shandong 1_2	Shandong 4	1	-
Deinococcus_Thermus	Shandong 2	Shandong 2	1	-
Deinococcus_Thermus	Shandong 2	Shandong 3	1	-
Deinococcus_Thermus	Shandong 2	Shandong 4	1	-
Deinococcus_Thermus	Shandong 3	Shandong 3	1	-
Deinococcus_Thermus	Shandong 3	Shandong 4	1	-
Deinococcus_Thermus	Shandong 4	Shandong 4	1	-
Firmicutes	Henan 1	Henan 1	1	-
Firmicutes	Henan 1	Henan 2	1	-
Firmicutes	Henan 1	Henan 3	1	-
Firmicutes	Henan 1	Liaoning 1	1	-
Firmicutes	Henan 1	Liaoning 2	1	-
Firmicutes	Henan 1	Liaoning 3	1	-
Firmicutes	Henan 1	Shandong 1_1	1	-
Firmicutes	Henan 1	Shandong 1_2	1	-
Firmicutes	Henan 1	Shandong 2	1	-
Firmicutes	Henan 1	Shandong 3	1	-
Firmicutes	Henan 1	Shandong 4	1	-
Firmicutes	Henan 2	Henan 2	1	-
Firmicutes	Henan 2	Henan 3	1	-
Firmicutes	Henan 2	Liaoning 1	1	-
Firmicutes	Henan 2	Liaoning 2	1	-
Firmicutes	Henan 2	Liaoning 3	1	-
Firmicutes	Henan 2	Shandong 1_1	1	-
Firmicutes	Henan 2	Shandong 1_2	1	-
Firmicutes	Henan 2	Shandong 2	1	-
Firmicutes	Henan 2	Shandong 3	1	-
Firmicutes	Henan 2	Shandong 4	1	-
Firmicutes	Henan 3	Henan 3	1	-
Firmicutes	Henan 3	Liaoning 1	1	-
Firmicutes	Henan 3	Liaoning 2	1	-
Firmicutes	Henan 3	Liaoning 3	1	-
Firmicutes	Henan 3	Shandong 1_1	1	-
Firmicutes	Henan 3	Shandong 1_2	1	-
Firmicutes	Henan 3	Shandong 2	1	-
Firmicutes	Henan 3	Shandong 3	1	-
Firmicutes	Henan 3	Shandong 4	1	-
Firmicutes	Liaoning 1	Liaoning 1	1	-
Firmicutes	Liaoning 1	Liaoning 2	1	-
Firmicutes	Liaoning 1	Liaoning 3	1	-
Firmicutes	Liaoning 1	Shandong 1_1	1	-
Firmicutes	Liaoning 1	Shandong 1_2	1	-
Firmicutes	Liaoning 1	Shandong 2	1	-
Firmicutes	Liaoning 1	Shandong 3	1	-
Firmicutes	Liaoning 1	Shandong 4	1	-
Firmicutes	Liaoning 2	Liaoning 2	1	-
Firmicutes	Liaoning 2	Liaoning 3	1	-
Firmicutes	Liaoning 2	Shandong 1_1	1	-
Firmicutes	Liaoning 2	Shandong 1_2	1	-
Firmicutes	Liaoning 2	Shandong 2	1	-
Firmicutes	Liaoning 2	Shandong 3	1	-
Firmicutes	Liaoning 2	Shandong 4	1	-
Firmicutes	Liaoning 3	Liaoning 3	1	-
Firmicutes	Liaoning 3	Shandong 1_1	1	-
Firmicutes	Liaoning 3	Shandong 1_2	1	-
Firmicutes	Liaoning 3	Shandong 2	1	-
Firmicutes	Liaoning 3	Shandong 3	1	-
Firmicutes	Liaoning 3	Shandong 4	1	-
Firmicutes	Shandong 1_1	Shandong 1_1	1	-
Firmicutes	Shandong 1_1	Shandong 1_2	1	-
Firmicutes	Shandong 1_1	Shandong 2	1	-
Firmicutes	Shandong 1_1	Shandong 3	1	-
Firmicutes	Shandong 1_1	Shandong 4	1	-
Firmicutes	Shandong 1_2	Shandong 1_2	1	-
Firmicutes	Shandong 1_2	Shandong 2	1	-
Firmicutes	Shandong 1_2	Shandong 3	1	-
Firmicutes	Shandong 1_2	Shandong 4	1	-
Firmicutes	Shandong 2	Shandong 2	1	-
Firmicutes	Shandong 2	Shandong 4	1	-
Firmicutes	Shandong 3	Shandong 3	1	-
Firmicutes	Shandong 4	Shandong 4	1	-
Fusobacteria	Henan 1	Henan 1	1	-
Fusobacteria	Henan 1	Henan 2	1	-
Fusobacteria	Henan 1	Henan 3	1	-
Fusobacteria	Henan 1	Liaoning 1	1	-
Fusobacteria	Henan 1	Liaoning 2	1	-
Fusobacteria	Henan 1	Liaoning 3	1	-
Fusobacteria	Henan 1	Shandong 1_1	1	-
Fusobacteria	Henan 1	Shandong 1_2	1	-
Fusobacteria	Henan 1	Shandong 2	1	-
Fusobacteria	Henan 1	Shandong 3	1	-
Fusobacteria	Henan 1	Shandong 4	1	-
Fusobacteria	Henan 2	Henan 2	1	-
Fusobacteria	Henan 2	Henan 3	1	-
Fusobacteria	Henan 2	Liaoning 1	1	-
Fusobacteria	Henan 2	Liaoning 2	1	-
Fusobacteria	Henan 2	Liaoning 3	1	-
Fusobacteria	Henan 2	Shandong 1_1	1	-
Fusobacteria	Henan 2	Shandong 1_2	1	-
Fusobacteria	Henan 2	Shandong 2	1	-
Fusobacteria	Henan 2	Shandong 3	1	-
Fusobacteria	Henan 2	Shandong 4	1	-
Fusobacteria	Henan 3	Henan 3	1	-
Fusobacteria	Henan 3	Liaoning 1	1	-
Fusobacteria	Henan 3	Liaoning 2	1	-
Fusobacteria	Henan 3	Liaoning 3	1	-
Fusobacteria	Henan 3	Shandong 1_1	1	-
Fusobacteria	Henan 3	Shandong 1_2	1	-
Fusobacteria	Henan 3	Shandong 2	1	-
Fusobacteria	Henan 3	Shandong 3	1	-
Fusobacteria	Henan 3	Shandong 4	1	-
Fusobacteria	Liaoning 1	Liaoning 1	1	-
Fusobacteria	Liaoning 1	Liaoning 2	1	-
Fusobacteria	Liaoning 1	Liaoning 3	1	-
Fusobacteria	Liaoning 1	Shandong 1_1	1	-
Fusobacteria	Liaoning 1	Shandong 1_2	1	-
Fusobacteria	Liaoning 1	Shandong 2	1	-
Fusobacteria	Liaoning 1	Shandong 3	1	-
Fusobacteria	Liaoning 1	Shandong 4	1	-
Fusobacteria	Liaoning 2	Liaoning 2	1	-
Fusobacteria	Liaoning 2	Liaoning 3	1	-
Fusobacteria	Liaoning 2	Shandong 1_1	1	-
Fusobacteria	Liaoning 2	Shandong 1_2	1	-
Fusobacteria	Liaoning 2	Shandong 2	1	-
Fusobacteria	Liaoning 2	Shandong 3	1	-
Fusobacteria	Liaoning 2	Shandong 4	1	-
Fusobacteria	Liaoning 3	Liaoning 3	1	-
Fusobacteria	Liaoning 3	Shandong 1_1	1	-
Fusobacteria	Liaoning 3	Shandong 1_2	1	-
Fusobacteria	Liaoning 3	Shandong 2	1	-
Fusobacteria	Liaoning 3	Shandong 3	1	-
Fusobacteria	Liaoning 3	Shandong 4	1	-
Fusobacteria	Shandong 1_1	Shandong 1_1	1	-
Fusobacteria	Shandong 1_1	Shandong 1_2	1	-
Fusobacteria	Shandong 1_1	Shandong 2	1	-
Fusobacteria	Shandong 1_1	Shandong 3	1	-
Fusobacteria	Shandong 1_1	Shandong 4	1	-
Fusobacteria	Shandong 1_2	Shandong 1_2	1	-
Fusobacteria	Shandong 1_2	Shandong 2	1	-
Fusobacteria	Shandong 1_2	Shandong 3	1	-
Fusobacteria	Shandong 1_2	Shandong 4	1	-
Fusobacteria	Shandong 2	Shandong 2	1	-
Fusobacteria	Shandong 2	Shandong 3	1	-
Fusobacteria	Shandong 2	Shandong 4	1	-
Fusobacteria	Shandong 3	Shandong 3	1	-
Fusobacteria	Shandong 3	Shandong 4	1	-
Fusobacteria	Shandong 4	Shandong 4	1	-
Gemmatimonadetes	Henan 1	Henan 1	1	-
Gemmatimonadetes	Henan 1	Henan 2	1	-
Gemmatimonadetes	Henan 1	Henan 3	1	-
Gemmatimonadetes	Henan 1	Liaoning 1	1	-
Gemmatimonadetes	Henan 1	Liaoning 2	1	-
Gemmatimonadetes	Henan 1	Liaoning 3	1	-
Gemmatimonadetes	Henan 1	Shandong 1_1	1	-
Gemmatimonadetes	Henan 1	Shandong 1_2	1	-
Gemmatimonadetes	Henan 1	Shandong 2	1	-
Gemmatimonadetes	Henan 1	Shandong 3	1	-
Gemmatimonadetes	Henan 1	Shandong 4	1	-
Gemmatimonadetes	Henan 2	Henan 2	1	-
Gemmatimonadetes	Henan 2	Henan 3	1	-
Gemmatimonadetes	Henan 2	Liaoning 1	1	-
Gemmatimonadetes	Henan 2	Liaoning 2	1	-
Gemmatimonadetes	Henan 2	Liaoning 3	1	-
Gemmatimonadetes	Henan 2	Shandong 1_1	1	-
Gemmatimonadetes	Henan 2	Shandong 1_2	1	-
Gemmatimonadetes	Henan 2	Shandong 2	1	-
Gemmatimonadetes	Henan 2	Shandong 3	1	-
Gemmatimonadetes	Henan 2	Shandong 4	1	-
Gemmatimonadetes	Henan 3	Henan 3	1	-
Gemmatimonadetes	Henan 3	Liaoning 1	1	-
Gemmatimonadetes	Henan 3	Liaoning 2	1	-
Gemmatimonadetes	Henan 3	Liaoning 3	1	-
Gemmatimonadetes	Henan 3	Shandong 1_1	1	-
Gemmatimonadetes	Henan 3	Shandong 1_2	1	-
Gemmatimonadetes	Henan 3	Shandong 2	1	-
Gemmatimonadetes	Henan 3	Shandong 3	1	-
Gemmatimonadetes	Henan 3	Shandong 4	1	-
Gemmatimonadetes	Liaoning 1	Liaoning 1	1	-
Gemmatimonadetes	Liaoning 1	Liaoning 2	1	-
Gemmatimonadetes	Liaoning 1	Liaoning 3	1	-
Gemmatimonadetes	Liaoning 1	Shandong 1_1	1	-
Gemmatimonadetes	Liaoning 1	Shandong 1_2	1	-
Gemmatimonadetes	Liaoning 1	Shandong 2	1	-
Gemmatimonadetes	Liaoning 1	Shandong 3	1	-
Gemmatimonadetes	Liaoning 1	Shandong 4	1	-
Gemmatimonadetes	Liaoning 2	Liaoning 2	1	-
Gemmatimonadetes	Liaoning 2	Liaoning 3	1	-
Gemmatimonadetes	Liaoning 2	Shandong 1_1	1	-
Gemmatimonadetes	Liaoning 2	Shandong 1_2	1	-
Gemmatimonadetes	Liaoning 2	Shandong 2	1	-
Gemmatimonadetes	Liaoning 2	Shandong 3	1	-
Gemmatimonadetes	Liaoning 2	Shandong 4	1	-
Gemmatimonadetes	Liaoning 3	Liaoning 3	1	-
Gemmatimonadetes	Liaoning 3	Shandong 1_1	1	-
Gemmatimonadetes	Liaoning 3	Shandong 1_2	1	-
Gemmatimonadetes	Liaoning 3	Shandong 2	1	-
Gemmatimonadetes	Liaoning 3	Shandong 3	1	-
Gemmatimonadetes	Liaoning 3	Shandong 4	1	-
Gemmatimonadetes	Shandong 1_1	Shandong 1_1	1	-
Gemmatimonadetes	Shandong 1_1	Shandong 1_2	1	-
Gemmatimonadetes	Shandong 1_1	Shandong 2	1	-
Gemmatimonadetes	Shandong 1_1	Shandong 3	1	-
Gemmatimonadetes	Shandong 1_1	Shandong 4	1	-
Gemmatimonadetes	Shandong 1_2	Shandong 1_2	1	-
Gemmatimonadetes	Shandong 1_2	Shandong 2	1	-
Gemmatimonadetes	Shandong 1_2	Shandong 3	1	-
Gemmatimonadetes	Shandong 1_2	Shandong 4	1	-
Gemmatimonadetes	Shandong 2	Shandong 2	1	-
Gemmatimonadetes	Shandong 2	Shandong 3	1	-
Gemmatimonadetes	Shandong 2	Shandong 4	1	-
Gemmatimonadetes	Shandong 3	Shandong 3	1	-
Gemmatimonadetes	Shandong 3	Shandong 4	1	-
Gemmatimonadetes	Shandong 4	Shandong 4	1	-
Lentisphaerae	Henan 1	Henan 1	1	-
Lentisphaerae	Henan 1	Henan 2	1	-
Lentisphaerae	Henan 1	Henan 3	1	-
Lentisphaerae	Henan 1	Liaoning 1	1	-
Lentisphaerae	Henan 1	Liaoning 2	1	-
Lentisphaerae	Henan 1	Liaoning 3	1	-
Lentisphaerae	Henan 1	Shandong 1_1	1	-
Lentisphaerae	Henan 1	Shandong 1_2	1	-
Lentisphaerae	Henan 1	Shandong 2	1	-
Lentisphaerae	Henan 1	Shandong 3	1	-
Lentisphaerae	Henan 1	Shandong 4	1	-
Lentisphaerae	Henan 2	Henan 2	1	-
Lentisphaerae	Henan 2	Henan 3	1	-
Lentisphaerae	Henan 2	Liaoning 1	1	-
Lentisphaerae	Henan 2	Liaoning 2	1	-
Lentisphaerae	Henan 2	Liaoning 3	1	-
Lentisphaerae	Henan 2	Shandong 1_1	1	-
Lentisphaerae	Henan 2	Shandong 1_2	1	-
Lentisphaerae	Henan 2	Shandong 2	1	-
Lentisphaerae	Henan 2	Shandong 3	1	-
Lentisphaerae	Henan 2	Shandong 4	1	-
Lentisphaerae	Henan 3	Henan 3	1	-
Lentisphaerae	Henan 3	Liaoning 1	1	-
Lentisphaerae	Henan 3	Liaoning 2	1	-
Lentisphaerae	Henan 3	Liaoning 3	1	-
Lentisphaerae	Henan 3	Shandong 1_1	1	-
Lentisphaerae	Henan 3	Shandong 1_2	1	-
Lentisphaerae	Henan 3	Shandong 2	1	-
Lentisphaerae	Henan 3	Shandong 3	1	-
Lentisphaerae	Henan 3	Shandong 4	1	-
Lentisphaerae	Liaoning 1	Liaoning 1	1	-
Lentisphaerae	Liaoning 1	Liaoning 2	1	-
Lentisphaerae	Liaoning 1	Liaoning 3	1	-
Lentisphaerae	Liaoning 1	Shandong 1_1	1	-
Lentisphaerae	Liaoning 1	Shandong 1_2	1	-
Lentisphaerae	Liaoning 1	Shandong 2	1	-
Lentisphaerae	Liaoning 1	Shandong 3	1	-
Lentisphaerae	Liaoning 1	Shandong 4	1	-
Lentisphaerae	Liaoning 2	Liaoning 2	1	-
Lentisphaerae	Liaoning 2	Liaoning 3	1	-
Lentisphaerae	Liaoning 2	Shandong 1_1	1	-
Lentisphaerae	Liaoning 2	Shandong 1_2	1	-
Lentisphaerae	Liaoning 2	Shandong 2	1	-
Lentisphaerae	Liaoning 2	Shandong 3	1	-
Lentisphaerae	Liaoning 2	Shandong 4	1	-
Lentisphaerae	Liaoning 3	Liaoning 3	1	-
Lentisphaerae	Liaoning 3	Shandong 1_1	1	-
Lentisphaerae	Liaoning 3	Shandong 1_2	1	-
Lentisphaerae	Liaoning 3	Shandong 2	1	-
Lentisphaerae	Liaoning 3	Shandong 3	1	-
Lentisphaerae	Liaoning 3	Shandong 4	1	-
Lentisphaerae	Shandong 1_1	Shandong 1_1	1	-
Lentisphaerae	Shandong 1_1	Shandong 1_2	1	-
Lentisphaerae	Shandong 1_1	Shandong 2	1	-
Lentisphaerae	Shandong 1_1	Shandong 3	1	-
Lentisphaerae	Shandong 1_1	Shandong 4	1	-
Lentisphaerae	Shandong 1_2	Shandong 1_2	1	-
Lentisphaerae	Shandong 1_2	Shandong 2	1	-
Lentisphaerae	Shandong 1_2	Shandong 3	1	-
Lentisphaerae	Shandong 1_2	Shandong 4	1	-
Lentisphaerae	Shandong 2	Shandong 2	1	-
Lentisphaerae	Shandong 2	Shandong 3	1	-
Lentisphaerae	Shandong 2	Shandong 4	1	-
Lentisphaerae	Shandong 3	Shandong 3	1	-
Lentisphaerae	Shandong 3	Shandong 4	1	-
Lentisphaerae	Shandong 4	Shandong 4	1	-
Nitrospirae	Henan 1	Henan 1	1	-
Nitrospirae	Henan 1	Henan 2	1	-
Nitrospirae	Henan 1	Henan 3	1	-
Nitrospirae	Henan 1	Liaoning 1	1	-
Nitrospirae	Henan 1	Liaoning 2	1	-
Nitrospirae	Henan 1	Liaoning 3	1	-
Nitrospirae	Henan 1	Shandong 1_1	1	-
Nitrospirae	Henan 1	Shandong 1_2	1	-
Nitrospirae	Henan 1	Shandong 2	1	-
Nitrospirae	Henan 1	Shandong 3	1	-
Nitrospirae	Henan 1	Shandong 4	1	-
Nitrospirae	Henan 2	Henan 2	1	-
Nitrospirae	Henan 2	Henan 3	1	-
Nitrospirae	Henan 2	Liaoning 1	1	-
Nitrospirae	Henan 2	Liaoning 2	1	-
Nitrospirae	Henan 2	Liaoning 3	1	-
Nitrospirae	Henan 2	Shandong 1_1	1	-
Nitrospirae	Henan 2	Shandong 1_2	1	-
Nitrospirae	Henan 2	Shandong 2	1	-
Nitrospirae	Henan 2	Shandong 3	1	-
Nitrospirae	Henan 2	Shandong 4	1	-
Nitrospirae	Henan 3	Henan 3	1	-
Nitrospirae	Henan 3	Liaoning 1	1	-
Nitrospirae	Henan 3	Liaoning 2	1	-
Nitrospirae	Henan 3	Liaoning 3	1	-
Nitrospirae	Henan 3	Shandong 1_1	1	-
Nitrospirae	Henan 3	Shandong 1_2	1	-
Nitrospirae	Henan 3	Shandong 2	1	-
Nitrospirae	Henan 3	Shandong 3	1	-
Nitrospirae	Henan 3	Shandong 4	1	-
Nitrospirae	Liaoning 1	Liaoning 1	1	-
Nitrospirae	Liaoning 1	Liaoning 2	1	-
Nitrospirae	Liaoning 1	Liaoning 3	1	-
Nitrospirae	Liaoning 1	Shandong 1_1	1	-
Nitrospirae	Liaoning 1	Shandong 1_2	1	-
Nitrospirae	Liaoning 1	Shandong 2	1	-
Nitrospirae	Liaoning 1	Shandong 3	1	-
Nitrospirae	Liaoning 1	Shandong 4	1	-
Nitrospirae	Liaoning 2	Liaoning 2	1	-
Nitrospirae	Liaoning 2	Liaoning 3	1	-
Nitrospirae	Liaoning 2	Shandong 1_1	1	-
Nitrospirae	Liaoning 2	Shandong 1_2	1	-
Nitrospirae	Liaoning 2	Shandong 2	1	-
Nitrospirae	Liaoning 2	Shandong 3	1	-
Nitrospirae	Liaoning 2	Shandong 4	1	-
Nitrospirae	Liaoning 3	Liaoning 3	1	-
Nitrospirae	Liaoning 3	Shandong 1_1	1	-
Nitrospirae	Liaoning 3	Shandong 1_2	1	-
Nitrospirae	Liaoning 3	Shandong 2	1	-
Nitrospirae	Liaoning 3	Shandong 3	1	-
Nitrospirae	Liaoning 3	Shandong 4	1	-
Nitrospirae	Shandong 1_1	Shandong 1_1	1	-
Nitrospirae	Shandong 1_1	Shandong 1_2	1	-
Nitrospirae	Shandong 1_1	Shandong 2	1	-
Nitrospirae	Shandong 1_1	Shandong 3	1	-
Nitrospirae	Shandong 1_1	Shandong 4	1	-
Nitrospirae	Shandong 1_2	Shandong 1_2	1	-
Nitrospirae	Shandong 1_2	Shandong 2	1	-
Nitrospirae	Shandong 1_2	Shandong 3	1	-
Nitrospirae	Shandong 1_2	Shandong 4	1	-
Nitrospirae	Shandong 2	Shandong 2	1	-
Nitrospirae	Shandong 2	Shandong 3	1	-
Nitrospirae	Shandong 2	Shandong 4	1	-
Nitrospirae	Shandong 3	Shandong 3	1	-
Nitrospirae	Shandong 3	Shandong 4	1	-
Nitrospirae	Shandong 4	Shandong 4	1	-
Planctomycetes	Henan 1	Henan 1	1	-
Planctomycetes	Henan 1	Henan 2	1	-
Planctomycetes	Henan 1	Henan 3	1	-
Planctomycetes	Henan 1	Liaoning 1	1	-
Planctomycetes	Henan 1	Liaoning 2	1	-
Planctomycetes	Henan 1	Liaoning 3	1	-
Planctomycetes	Henan 1	Shandong 1_1	1	-
Planctomycetes	Henan 1	Shandong 1_2	1	-
Planctomycetes	Henan 1	Shandong 2	1	-
Planctomycetes	Henan 1	Shandong 3	1	-
Planctomycetes	Henan 1	Shandong 4	1	-
Planctomycetes	Henan 2	Henan 2	1	-
Planctomycetes	Henan 2	Henan 3	1	-
Planctomycetes	Henan 2	Liaoning 1	1	-
Planctomycetes	Henan 2	Liaoning 2	1	-
Planctomycetes	Henan 2	Liaoning 3	1	-
Planctomycetes	Henan 2	Shandong 1_1	1	-
Planctomycetes	Henan 2	Shandong 1_2	1	-
Planctomycetes	Henan 2	Shandong 2	1	-
Planctomycetes	Henan 2	Shandong 3	1	-
Planctomycetes	Henan 2	Shandong 4	1	-
Planctomycetes	Henan 3	Henan 3	1	-
Planctomycetes	Henan 3	Liaoning 1	1	-
Planctomycetes	Henan 3	Liaoning 2	1	-
Planctomycetes	Henan 3	Liaoning 3	1	-
Planctomycetes	Henan 3	Shandong 1_1	1	-
Planctomycetes	Henan 3	Shandong 1_2	1	-
Planctomycetes	Henan 3	Shandong 2	1	-
Planctomycetes	Henan 3	Shandong 3	1	-
Planctomycetes	Henan 3	Shandong 4	1	-
Planctomycetes	Liaoning 1	Liaoning 1	1	-
Planctomycetes	Liaoning 1	Liaoning 2	1	-
Planctomycetes	Liaoning 1	Liaoning 3	1	-
Planctomycetes	Liaoning 1	Shandong 1_1	1	-
Planctomycetes	Liaoning 1	Shandong 1_2	1	-
Planctomycetes	Liaoning 1	Shandong 2	1	-
Planctomycetes	Liaoning 1	Shandong 3	1	-
Planctomycetes	Liaoning 1	Shandong 4	1	-
Planctomycetes	Liaoning 2	Liaoning 2	1	-
Planctomycetes	Liaoning 2	Liaoning 3	1	-
Planctomycetes	Liaoning 2	Shandong 1_1	1	-
Planctomycetes	Liaoning 2	Shandong 1_2	1	-
Planctomycetes	Liaoning 2	Shandong 2	1	-
Planctomycetes	Liaoning 2	Shandong 3	1	-
Planctomycetes	Liaoning 2	Shandong 4	1	-
Planctomycetes	Liaoning 3	Liaoning 3	1	-
Planctomycetes	Liaoning 3	Shandong 1_1	1	-
Planctomycetes	Liaoning 3	Shandong 1_2	1	-
Planctomycetes	Liaoning 3	Shandong 2	1	-
Planctomycetes	Liaoning 3	Shandong 3	1	-
Planctomycetes	Liaoning 3	Shandong 4	1	-
Planctomycetes	Shandong 1_1	Shandong 1_1	1	-
Planctomycetes	Shandong 1_1	Shandong 1_2	1	-
Planctomycetes	Shandong 1_1	Shandong 2	1	-
Planctomycetes	Shandong 1_1	Shandong 3	1	-
Planctomycetes	Shandong 1_1	Shandong 4	1	-
Planctomycetes	Shandong 1_2	Shandong 1_2	1	-
Planctomycetes	Shandong 1_2	Shandong 2	1	-
Planctomycetes	Shandong 1_2	Shandong 3	1	-
Planctomycetes	Shandong 1_2	Shandong 4	1	-
Planctomycetes	Shandong 2	Shandong 2	1	-
Planctomycetes	Shandong 2	Shandong 3	1	-
Planctomycetes	Shandong 2	Shandong 4	1	-
Planctomycetes	Shandong 3	Shandong 3	1	-
Planctomycetes	Shandong 3	Shandong 4	1	-
Planctomycetes	Shandong 4	Shandong 4	1	-
Proteobacteria	Henan 1	Henan 1	1	-
Proteobacteria	Henan 1	Henan 2	1	-
Proteobacteria	Henan 1	Henan 3	1	-
Proteobacteria	Henan 1	Liaoning 1	1	-
Proteobacteria	Henan 1	Liaoning 3	1	-
Proteobacteria	Henan 1	Shandong 1_1	1	-
Proteobacteria	Henan 1	Shandong 1_2	1	-
Proteobacteria	Henan 1	Shandong 2	1	-
Proteobacteria	Henan 1	Shandong 4	1	-
Proteobacteria	Henan 2	Henan 2	1	-
Proteobacteria	Henan 2	Henan 3	1	-
Proteobacteria	Henan 2	Liaoning 1	1	-
Proteobacteria	Henan 2	Liaoning 2	1	-
Proteobacteria	Henan 2	Liaoning 3	1	-
Proteobacteria	Henan 2	Shandong 1_1	1	-
Proteobacteria	Henan 2	Shandong 1_2	1	-
Proteobacteria	Henan 2	Shandong 2	1	-
Proteobacteria	Henan 2	Shandong 3	1	-
Proteobacteria	Henan 2	Shandong 4	1	-
Proteobacteria	Henan 3	Henan 3	1	-
Proteobacteria	Henan 3	Liaoning 1	1	-
Proteobacteria	Henan 3	Liaoning 2	1	-
Proteobacteria	Henan 3	Liaoning 3	1	-
Proteobacteria	Henan 3	Shandong 1_1	1	-
Proteobacteria	Henan 3	Shandong 1_2	1	-
Proteobacteria	Henan 3	Shandong 2	1	-
Proteobacteria	Henan 3	Shandong 3	1	-
Proteobacteria	Henan 3	Shandong 4	1	-
Proteobacteria	Liaoning 1	Liaoning 1	1	-
Proteobacteria	Liaoning 1	Liaoning 2	1	-
Proteobacteria	Liaoning 1	Liaoning 3	1	-
Proteobacteria	Liaoning 1	Shandong 1_1	1	-
Proteobacteria	Liaoning 1	Shandong 1_2	1	-
Proteobacteria	Liaoning 1	Shandong 2	1	-
Proteobacteria	Liaoning 1	Shandong 3	1	-
Proteobacteria	Liaoning 1	Shandong 4	1	-
Proteobacteria	Liaoning 2	Liaoning 2	1	-
Proteobacteria	Liaoning 2	Liaoning 3	1	-
Proteobacteria	Liaoning 2	Shandong 1_1	1	-
Proteobacteria	Liaoning 2	Shandong 1_2	1	-
Proteobacteria	Liaoning 2	Shandong 2	1	-
Proteobacteria	Liaoning 2	Shandong 3	1	-
Proteobacteria	Liaoning 2	Shandong 4	1	-
Proteobacteria	Liaoning 3	Liaoning 3	1	-
Proteobacteria	Liaoning 3	Shandong 1_1	1	-
Proteobacteria	Liaoning 3	Shandong 1_2	1	-
Proteobacteria	Liaoning 3	Shandong 2	1	-
Proteobacteria	Liaoning 3	Shandong 3	1	-
Proteobacteria	Liaoning 3	Shandong 4	1	-
Proteobacteria	Shandong 1_1	Shandong 1_1	1	-
Proteobacteria	Shandong 1_1	Shandong 1_2	1	-
Proteobacteria	Shandong 1_1	Shandong 2	1	-
Proteobacteria	Shandong 1_1	Shandong 3	1	-
Proteobacteria	Shandong 1_1	Shandong 4	1	-
Proteobacteria	Shandong 1_2	Shandong 1_2	1	-
Proteobacteria	Shandong 1_2	Shandong 2	1	-
Proteobacteria	Shandong 1_2	Shandong 3	1	-
Proteobacteria	Shandong 1_2	Shandong 4	1	-
Proteobacteria	Shandong 2	Shandong 2	1	-
Proteobacteria	Shandong 2	Shandong 3	1	-
Proteobacteria	Shandong 2	Shandong 4	1	-
Proteobacteria	Shandong 3	Shandong 3	1	-
Proteobacteria	Shandong 3	Shandong 4	1	-
Proteobacteria	Shandong 4	Shandong 4	1	-
Synergistetes	Henan 1	Henan 1	1	-
Synergistetes	Henan 1	Henan 2	1	-
Synergistetes	Henan 1	Henan 3	1	-
Synergistetes	Henan 1	Liaoning 1	1	-
Synergistetes	Henan 1	Liaoning 2	1	-
Synergistetes	Henan 1	Liaoning 3	1	-
Synergistetes	Henan 1	Shandong 1_1	1	-
Synergistetes	Henan 1	Shandong 1_2	1	-
Synergistetes	Henan 1	Shandong 2	1	-
Synergistetes	Henan 1	Shandong 3	1	-
Synergistetes	Henan 1	Shandong 4	1	-
Synergistetes	Henan 2	Henan 2	1	-
Synergistetes	Henan 2	Henan 3	1	-
Synergistetes	Henan 2	Liaoning 1	1	-
Synergistetes	Henan 2	Liaoning 2	1	-
Synergistetes	Henan 2	Liaoning 3	1	-
Synergistetes	Henan 2	Shandong 1_1	1	-
Synergistetes	Henan 2	Shandong 1_2	1	-
Synergistetes	Henan 2	Shandong 2	1	-
Synergistetes	Henan 2	Shandong 3	1	-
Synergistetes	Henan 2	Shandong 4	1	-
Synergistetes	Henan 3	Henan 3	1	-
Synergistetes	Henan 3	Liaoning 1	1	-
Synergistetes	Henan 3	Liaoning 2	1	-
Synergistetes	Henan 3	Liaoning 3	1	-
Synergistetes	Henan 3	Shandong 1_1	1	-
Synergistetes	Henan 3	Shandong 1_2	1	-
Synergistetes	Henan 3	Shandong 2	1	-
Synergistetes	Henan 3	Shandong 3	1	-
Synergistetes	Henan 3	Shandong 4	1	-
Synergistetes	Liaoning 1	Liaoning 1	1	-
Synergistetes	Liaoning 1	Liaoning 2	1	-
Synergistetes	Liaoning 1	Liaoning 3	1	-
Synergistetes	Liaoning 1	Shandong 1_1	1	-
Synergistetes	Liaoning 1	Shandong 1_2	1	-
Synergistetes	Liaoning 1	Shandong 2	1	-
Synergistetes	Liaoning 1	Shandong 3	1	-
Synergistetes	Liaoning 1	Shandong 4	1	-
Synergistetes	Liaoning 2	Liaoning 2	1	-
Synergistetes	Liaoning 2	Liaoning 3	1	-
Synergistetes	Liaoning 2	Shandong 1_1	1	-
Synergistetes	Liaoning 2	Shandong 1_2	1	-
Synergistetes	Liaoning 2	Shandong 2	1	-
Synergistetes	Liaoning 2	Shandong 3	1	-
Synergistetes	Liaoning 2	Shandong 4	1	-
Synergistetes	Liaoning 3	Liaoning 3	1	-
Synergistetes	Liaoning 3	Shandong 1_1	1	-
Synergistetes	Liaoning 3	Shandong 1_2	1	-
Synergistetes	Liaoning 3	Shandong 2	1	-
Synergistetes	Liaoning 3	Shandong 3	1	-
Synergistetes	Liaoning 3	Shandong 4	1	-
Synergistetes	Shandong 1_1	Shandong 1_1	1	-
Synergistetes	Shandong 1_1	Shandong 1_2	1	-
Synergistetes	Shandong 1_1	Shandong 2	1	-
Synergistetes	Shandong 1_1	Shandong 3	1	-
Synergistetes	Shandong 1_1	Shandong 4	1	-
Synergistetes	Shandong 1_2	Shandong 1_2	1	-
Synergistetes	Shandong 1_2	Shandong 2	1	-
Synergistetes	Shandong 1_2	Shandong 3	1	-
Synergistetes	Shandong 1_2	Shandong 4	1	-
Synergistetes	Shandong 2	Shandong 2	1	-
Synergistetes	Shandong 2	Shandong 3	1	-
Synergistetes	Shandong 2	Shandong 4	1	-
Synergistetes	Shandong 3	Shandong 3	1	-
Synergistetes	Shandong 3	Shandong 4	1	-
Synergistetes	Shandong 4	Shandong 4	1	-
Tenericutes	Henan 1	Henan 1	1	-
Tenericutes	Henan 1	Henan 2	1	-
Tenericutes	Henan 1	Henan 3	1	-
Tenericutes	Henan 1	Liaoning 1	1	-
Tenericutes	Henan 1	Liaoning 2	1	-
Tenericutes	Henan 1	Liaoning 3	1	-
Tenericutes	Henan 1	Shandong 1_1	1	-
Tenericutes	Henan 1	Shandong 1_2	1	-
Tenericutes	Henan 1	Shandong 3	1	-
Tenericutes	Henan 1	Shandong 4	1	-
Tenericutes	Henan 2	Henan 2	1	-
Tenericutes	Henan 2	Henan 3	1	-
Tenericutes	Henan 2	Liaoning 1	1	-
Tenericutes	Henan 2	Liaoning 2	1	-
Tenericutes	Henan 2	Liaoning 3	1	-
Tenericutes	Henan 2	Shandong 1_1	1	-
Tenericutes	Henan 2	Shandong 1_2	1	-
Tenericutes	Henan 2	Shandong 3	1	-
Tenericutes	Henan 2	Shandong 4	1	-
Tenericutes	Henan 3	Henan 3	1	-
Tenericutes	Henan 3	Liaoning 1	1	-
Tenericutes	Henan 3	Liaoning 2	1	-
Tenericutes	Henan 3	Liaoning 3	1	-
Tenericutes	Henan 3	Shandong 1_1	1	-
Tenericutes	Henan 3	Shandong 1_2	1	-
Tenericutes	Henan 3	Shandong 3	1	-
Tenericutes	Henan 3	Shandong 4	1	-
Tenericutes	Liaoning 1	Liaoning 1	1	-
Tenericutes	Liaoning 1	Liaoning 2	1	-
Tenericutes	Liaoning 1	Liaoning 3	1	-
Tenericutes	Liaoning 1	Shandong 1_1	1	-
Tenericutes	Liaoning 1	Shandong 1_2	1	-
Tenericutes	Liaoning 1	Shandong 3	1	-
Tenericutes	Liaoning 1	Shandong 4	1	-
Tenericutes	Liaoning 2	Liaoning 2	1	-
Tenericutes	Liaoning 2	Liaoning 3	1	-
Tenericutes	Liaoning 2	Shandong 1_1	1	-
Tenericutes	Liaoning 2	Shandong 1_2	1	-
Tenericutes	Liaoning 2	Shandong 3	1	-
Tenericutes	Liaoning 2	Shandong 4	1	-
Tenericutes	Liaoning 3	Liaoning 3	1	-
Tenericutes	Liaoning 3	Shandong 1_1	1	-
Tenericutes	Liaoning 3	Shandong 1_2	1	-
Tenericutes	Liaoning 3	Shandong 3	1	-
Tenericutes	Liaoning 3	Shandong 4	1	-
Tenericutes	Shandong 1_1	Shandong 1_1	1	-
Tenericutes	Shandong 1_1	Shandong 1_2	1	-
Tenericutes	Shandong 1_1	Shandong 3	1	-
Tenericutes	Shandong 1_1	Shandong 4	1	-
Tenericutes	Shandong 1_2	Shandong 1_2	1	-
Tenericutes	Shandong 1_2	Shandong 3	1	-
Tenericutes	Shandong 1_2	Shandong 4	1	-
Tenericutes	Shandong 2	Shandong 2	1	-
Tenericutes	Shandong 2	Shandong 4	1	-
Tenericutes	Shandong 3	Shandong 3	1	-
Tenericutes	Shandong 3	Shandong 4	1	-
Tenericutes	Shandong 4	Shandong 4	1	-
Thermotogae	Henan 1	Henan 1	1	-
Thermotogae	Henan 1	Henan 2	1	-
Thermotogae	Henan 1	Henan 3	1	-
Thermotogae	Henan 1	Liaoning 1	1	-
Thermotogae	Henan 1	Liaoning 2	1	-
Thermotogae	Henan 1	Liaoning 3	1	-
Thermotogae	Henan 1	Shandong 1_1	1	-
Thermotogae	Henan 1	Shandong 1_2	1	-
Thermotogae	Henan 1	Shandong 2	1	-
Thermotogae	Henan 1	Shandong 3	1	-
Thermotogae	Henan 1	Shandong 4	1	-
Thermotogae	Henan 2	Henan 2	1	-
Thermotogae	Henan 2	Henan 3	1	-
Thermotogae	Henan 2	Liaoning 1	1	-
Thermotogae	Henan 2	Liaoning 2	1	-
Thermotogae	Henan 2	Liaoning 3	1	-
Thermotogae	Henan 2	Shandong 1_1	1	-
Thermotogae	Henan 2	Shandong 1_2	1	-
Thermotogae	Henan 2	Shandong 2	1	-
Thermotogae	Henan 2	Shandong 3	1	-
Thermotogae	Henan 2	Shandong 4	1	-
Thermotogae	Henan 3	Henan 3	1	-
Thermotogae	Henan 3	Liaoning 1	1	-
Thermotogae	Henan 3	Liaoning 2	1	-
Thermotogae	Henan 3	Liaoning 3	1	-
Thermotogae	Henan 3	Shandong 1_1	1	-
Thermotogae	Henan 3	Shandong 1_2	1	-
Thermotogae	Henan 3	Shandong 2	1	-
Thermotogae	Henan 3	Shandong 3	1	-
Thermotogae	Henan 3	Shandong 4	1	-
Thermotogae	Liaoning 1	Liaoning 1	1	-
Thermotogae	Liaoning 1	Liaoning 2	1	-
Thermotogae	Liaoning 1	Liaoning 3	1	-
Thermotogae	Liaoning 1	Shandong 1_1	1	-
Thermotogae	Liaoning 1	Shandong 1_2	1	-
Thermotogae	Liaoning 1	Shandong 2	1	-
Thermotogae	Liaoning 1	Shandong 3	1	-
Thermotogae	Liaoning 1	Shandong 4	1	-
Thermotogae	Liaoning 2	Liaoning 2	1	-
Thermotogae	Liaoning 2	Liaoning 3	1	-
Thermotogae	Liaoning 2	Shandong 1_1	1	-
Thermotogae	Liaoning 2	Shandong 1_2	1	-
Thermotogae	Liaoning 2	Shandong 2	1	-
Thermotogae	Liaoning 2	Shandong 3	1	-
Thermotogae	Liaoning 2	Shandong 4	1	-
Thermotogae	Liaoning 3	Liaoning 3	1	-
Thermotogae	Liaoning 3	Shandong 1_1	1	-
Thermotogae	Liaoning 3	Shandong 1_2	1	-
Thermotogae	Liaoning 3	Shandong 2	1	-
Thermotogae	Liaoning 3	Shandong 3	1	-
Thermotogae	Liaoning 3	Shandong 4	1	-
Thermotogae	Shandong 1_1	Shandong 1_1	1	-
Thermotogae	Shandong 1_1	Shandong 1_2	1	-
Thermotogae	Shandong 1_1	Shandong 2	1	-
Thermotogae	Shandong 1_1	Shandong 3	1	-
Thermotogae	Shandong 1_1	Shandong 4	1	-
Thermotogae	Shandong 1_2	Shandong 1_2	1	-
Thermotogae	Shandong 1_2	Shandong 2	1	-
Thermotogae	Shandong 1_2	Shandong 3	1	-
Thermotogae	Shandong 1_2	Shandong 4	1	-
Thermotogae	Shandong 2	Shandong 2	1	-
Thermotogae	Shandong 2	Shandong 3	1	-
Thermotogae	Shandong 2	Shandong 4	1	-
Thermotogae	Shandong 3	Shandong 3	1	-
Thermotogae	Shandong 3	Shandong 4	1	-
Thermotogae	Shandong 4	Shandong 4	1	-
Verrucomicrobia	Henan 1	Henan 1	1	-
Verrucomicrobia	Henan 1	Henan 2	1	-
Verrucomicrobia	Henan 1	Henan 3	1	-
Verrucomicrobia	Henan 1	Liaoning 1	1	-
Verrucomicrobia	Henan 1	Liaoning 2	1	-
Verrucomicrobia	Henan 1	Liaoning 3	1	-
Verrucomicrobia	Henan 1	Shandong 1_1	1	-
Verrucomicrobia	Henan 1	Shandong 1_2	1	-
Verrucomicrobia	Henan 1	Shandong 2	1	-
Verrucomicrobia	Henan 1	Shandong 3	1	-
Verrucomicrobia	Henan 1	Shandong 4	1	-
Verrucomicrobia	Henan 2	Henan 2	1	-
Verrucomicrobia	Henan 2	Henan 3	1	-
Verrucomicrobia	Henan 2	Liaoning 1	1	-
Verrucomicrobia	Henan 2	Liaoning 2	1	-
Verrucomicrobia	Henan 2	Liaoning 3	1	-
Verrucomicrobia	Henan 2	Shandong 1_1	1	-
Verrucomicrobia	Henan 2	Shandong 1_2	1	-
Verrucomicrobia	Henan 2	Shandong 2	1	-
Verrucomicrobia	Henan 2	Shandong 3	1	-
Verrucomicrobia	Henan 2	Shandong 4	1	-
Verrucomicrobia	Henan 3	Henan 3	1	-
Verrucomicrobia	Henan 3	Liaoning 1	1	-
Verrucomicrobia	Henan 3	Liaoning 2	1	-
Verrucomicrobia	Henan 3	Liaoning 3	1	-
Verrucomicrobia	Henan 3	Shandong 1_1	1	-
Verrucomicrobia	Henan 3	Shandong 1_2	1	-
Verrucomicrobia	Henan 3	Shandong 2	1	-
Verrucomicrobia	Henan 3	Shandong 3	1	-
Verrucomicrobia	Henan 3	Shandong 4	1	-
Verrucomicrobia	Liaoning 1	Liaoning 1	1	-
Verrucomicrobia	Liaoning 1	Liaoning 2	1	-
Verrucomicrobia	Liaoning 1	Liaoning 3	1	-
Verrucomicrobia	Liaoning 1	Shandong 1_1	1	-
Verrucomicrobia	Liaoning 1	Shandong 1_2	1	-
Verrucomicrobia	Liaoning 1	Shandong 2	1	-
Verrucomicrobia	Liaoning 1	Shandong 3	1	-
Verrucomicrobia	Liaoning 1	Shandong 4	1	-
Verrucomicrobia	Liaoning 2	Liaoning 2	1	-
Verrucomicrobia	Liaoning 2	Liaoning 3	1	-
Verrucomicrobia	Liaoning 2	Shandong 1_1	1	-
Verrucomicrobia	Liaoning 2	Shandong 1_2	1	-
Verrucomicrobia	Liaoning 2	Shandong 2	1	-
Verrucomicrobia	Liaoning 2	Shandong 3	1	-
Verrucomicrobia	Liaoning 2	Shandong 4	1	-
Verrucomicrobia	Liaoning 3	Liaoning 3	1	-
Verrucomicrobia	Liaoning 3	Shandong 1_1	1	-
Verrucomicrobia	Liaoning 3	Shandong 1_2	1	-
Verrucomicrobia	Liaoning 3	Shandong 2	1	-
Verrucomicrobia	Liaoning 3	Shandong 3	1	-
Verrucomicrobia	Liaoning 3	Shandong 4	1	-
Verrucomicrobia	Shandong 1_1	Shandong 1_1	1	-
Verrucomicrobia	Shandong 1_1	Shandong 1_2	1	-
Verrucomicrobia	Shandong 1_1	Shandong 2	1	-
Verrucomicrobia	Shandong 1_1	Shandong 3	1	-
Verrucomicrobia	Shandong 1_1	Shandong 4	1	-
Verrucomicrobia	Shandong 1_2	Shandong 1_2	1	-
Verrucomicrobia	Shandong 1_2	Shandong 2	1	-
Verrucomicrobia	Shandong 1_2	Shandong 3	1	-
Verrucomicrobia	Shandong 1_2	Shandong 4	1	-
Verrucomicrobia	Shandong 2	Shandong 2	1	-
Verrucomicrobia	Shandong 2	Shandong 3	1	-
Verrucomicrobia	Shandong 2	Shandong 4	1	-
Verrucomicrobia	Shandong 3	Shandong 3	1	-
Verrucomicrobia	Shandong 3	Shandong 4	1	-
Verrucomicrobia	Shandong 4	Shandong 4	1	-
candidate_division_NC10	Henan 1	Henan 1	1	-
candidate_division_NC10	Henan 1	Henan 2	1	-
candidate_division_NC10	Henan 1	Henan 3	1	-
candidate_division_NC10	Henan 1	Liaoning 1	1	-
candidate_division_NC10	Henan 1	Liaoning 2	1	-
candidate_division_NC10	Henan 1	Liaoning 3	1	-
candidate_division_NC10	Henan 1	Shandong 1_1	1	-
candidate_division_NC10	Henan 1	Shandong 1_2	1	-
candidate_division_NC10	Henan 1	Shandong 2	1	-
candidate_division_NC10	Henan 1	Shandong 3	1	-
candidate_division_NC10	Henan 1	Shandong 4	1	-
candidate_division_NC10	Henan 2	Henan 2	1	-
candidate_division_NC10	Henan 2	Henan 3	1	-
candidate_division_NC10	Henan 2	Liaoning 1	1	-
candidate_division_NC10	Henan 2	Liaoning 2	1	-
candidate_division_NC10	Henan 2	Liaoning 3	1	-
candidate_division_NC10	Henan 2	Shandong 1_1	1	-
candidate_division_NC10	Henan 2	Shandong 1_2	1	-
candidate_division_NC10	Henan 2	Shandong 2	1	-
candidate_division_NC10	Henan 2	Shandong 3	1	-
candidate_division_NC10	Henan 2	Shandong 4	1	-
candidate_division_NC10	Henan 3	Henan 3	1	-
candidate_division_NC10	Henan 3	Liaoning 1	1	-
candidate_division_NC10	Henan 3	Liaoning 2	1	-
candidate_division_NC10	Henan 3	Liaoning 3	1	-
candidate_division_NC10	Henan 3	Shandong 1_1	1	-
candidate_division_NC10	Henan 3	Shandong 1_2	1	-
candidate_division_NC10	Henan 3	Shandong 2	1	-
candidate_division_NC10	Henan 3	Shandong 3	1	-
candidate_division_NC10	Henan 3	Shandong 4	1	-
candidate_division_NC10	Liaoning 1	Liaoning 1	1	-
candidate_division_NC10	Liaoning 1	Liaoning 2	1	-
candidate_division_NC10	Liaoning 1	Liaoning 3	1	-
candidate_division_NC10	Liaoning 1	Shandong 1_1	1	-
candidate_division_NC10	Liaoning 1	Shandong 1_2	1	-
candidate_division_NC10	Liaoning 1	Shandong 2	1	-
candidate_division_NC10	Liaoning 1	Shandong 3	1	-
candidate_division_NC10	Liaoning 1	Shandong 4	1	-
candidate_division_NC10	Liaoning 2	Liaoning 2	1	-
candidate_division_NC10	Liaoning 2	Liaoning 3	1	-
candidate_division_NC10	Liaoning 2	Shandong 1_1	1	-
candidate_division_NC10	Liaoning 2	Shandong 1_2	1	-
candidate_division_NC10	Liaoning 2	Shandong 2	1	-
candidate_division_NC10	Liaoning 2	Shandong 3	1	-
candidate_division_NC10	Liaoning 2	Shandong 4	1	-
candidate_division_NC10	Liaoning 3	Liaoning 3	1	-
candidate_division_NC10	Liaoning 3	Shandong 1_1	1	-
candidate_division_NC10	Liaoning 3	Shandong 1_2	1	-
candidate_division_NC10	Liaoning 3	Shandong 2	1	-
candidate_division_NC10	Liaoning 3	Shandong 3	1	-
candidate_division_NC10	Liaoning 3	Shandong 4	1	-
candidate_division_NC10	Shandong 1_1	Shandong 1_1	1	-
candidate_division_NC10	Shandong 1_1	Shandong 1_2	1	-
candidate_division_NC10	Shandong 1_1	Shandong 2	1	-
candidate_division_NC10	Shandong 1_1	Shandong 3	1	-
candidate_division_NC10	Shandong 1_1	Shandong 4	1	-
candidate_division_NC10	Shandong 1_2	Shandong 1_2	1	-
candidate_division_NC10	Shandong 1_2	Shandong 2	1	-
candidate_division_NC10	Shandong 1_2	Shandong 3	1	-
candidate_division_NC10	Shandong 1_2	Shandong 4	1	-
candidate_division_NC10	Shandong 2	Shandong 2	1	-
candidate_division_NC10	Shandong 2	Shandong 3	1	-
candidate_division_NC10	Shandong 2	Shandong 4	1	-
candidate_division_NC10	Shandong 3	Shandong 3	1	-
candidate_division_NC10	Shandong 3	Shandong 4	1	-
candidate_division_NC10	Shandong 4	Shandong 4	1	-
Apicomplexa	Henan 1	Henan 1	1	-
Apicomplexa	Henan 1	Henan 2	1	-
Apicomplexa	Henan 1	Henan 3	1	-
Apicomplexa	Henan 1	Liaoning 1	1	-
Apicomplexa	Henan 1	Liaoning 2	1	-
Apicomplexa	Henan 1	Liaoning 3	1	-
Apicomplexa	Henan 1	Shandong 1_1	1	-
Apicomplexa	Henan 1	Shandong 1_2	1	-
Apicomplexa	Henan 1	Shandong 2	1	-
Apicomplexa	Henan 1	Shandong 3	1	-
Apicomplexa	Henan 1	Shandong 4	1	-
Apicomplexa	Henan 2	Henan 2	1	-
Apicomplexa	Henan 2	Henan 3	1	-
Apicomplexa	Henan 2	Liaoning 1	1	-
Apicomplexa	Henan 2	Liaoning 2	1	-
Apicomplexa	Henan 2	Liaoning 3	1	-
Apicomplexa	Henan 2	Shandong 1_1	1	-
Apicomplexa	Henan 2	Shandong 1_2	1	-
Apicomplexa	Henan 2	Shandong 2	1	-
Apicomplexa	Henan 2	Shandong 3	1	-
Apicomplexa	Henan 2	Shandong 4	1	-
Apicomplexa	Henan 3	Henan 3	1	-
Apicomplexa	Henan 3	Liaoning 1	1	-
Apicomplexa	Henan 3	Liaoning 2	1	-
Apicomplexa	Henan 3	Liaoning 3	1	-
Apicomplexa	Henan 3	Shandong 1_1	1	-
Apicomplexa	Henan 3	Shandong 1_2	1	-
Apicomplexa	Henan 3	Shandong 2	1	-
Apicomplexa	Henan 3	Shandong 3	1	-
Apicomplexa	Henan 3	Shandong 4	1	-
Apicomplexa	Liaoning 1	Liaoning 1	1	-
Apicomplexa	Liaoning 1	Liaoning 2	1	-
Apicomplexa	Liaoning 1	Liaoning 3	1	-
Apicomplexa	Liaoning 1	Shandong 1_1	1	-
Apicomplexa	Liaoning 1	Shandong 1_2	1	-
Apicomplexa	Liaoning 1	Shandong 2	1	-
Apicomplexa	Liaoning 1	Shandong 3	1	-
Apicomplexa	Liaoning 1	Shandong 4	1	-
Apicomplexa	Liaoning 2	Liaoning 2	1	-
Apicomplexa	Liaoning 2	Liaoning 3	1	-
Apicomplexa	Liaoning 2	Shandong 1_1	1	-
Apicomplexa	Liaoning 2	Shandong 1_2	1	-
Apicomplexa	Liaoning 2	Shandong 2	1	-
Apicomplexa	Liaoning 2	Shandong 3	1	-
Apicomplexa	Liaoning 2	Shandong 4	1	-
Apicomplexa	Liaoning 3	Liaoning 3	1	-
Apicomplexa	Liaoning 3	Shandong 1_1	1	-
Apicomplexa	Liaoning 3	Shandong 1_2	1	-
Apicomplexa	Liaoning 3	Shandong 2	1	-
Apicomplexa	Liaoning 3	Shandong 3	1	-
Apicomplexa	Liaoning 3	Shandong 4	1	-
Apicomplexa	Shandong 1_1	Shandong 1_1	1	-
Apicomplexa	Shandong 1_1	Shandong 1_2	1	-
Apicomplexa	Shandong 1_1	Shandong 2	1	-
Apicomplexa	Shandong 1_1	Shandong 3	1	-
Apicomplexa	Shandong 1_1	Shandong 4	1	-
Apicomplexa	Shandong 1_2	Shandong 1_2	1	-
Apicomplexa	Shandong 1_2	Shandong 2	1	-
Apicomplexa	Shandong 1_2	Shandong 3	1	-
Apicomplexa	Shandong 1_2	Shandong 4	1	-
Apicomplexa	Shandong 2	Shandong 2	1	-
Apicomplexa	Shandong 2	Shandong 3	1	-
Apicomplexa	Shandong 2	Shandong 4	1	-
Apicomplexa	Shandong 3	Shandong 3	1	-
Apicomplexa	Shandong 3	Shandong 4	1	-
Apicomplexa	Shandong 4	Shandong 4	1	-
Ascomycota	Henan 1	Henan 1	1	-
Ascomycota	Henan 1	Henan 2	1	-
Ascomycota	Henan 1	Henan 3	1	-
Ascomycota	Henan 1	Liaoning 1	1	-
Ascomycota	Henan 1	Liaoning 2	1	-
Ascomycota	Henan 1	Liaoning 3	1	-
Ascomycota	Henan 1	Shandong 1_1	1	-
Ascomycota	Henan 1	Shandong 1_2	1	-
Ascomycota	Henan 1	Shandong 2	1	-
Ascomycota	Henan 1	Shandong 3	1	-
Ascomycota	Henan 1	Shandong 4	1	-
Ascomycota	Henan 2	Henan 2	1	-
Ascomycota	Henan 2	Henan 3	1	-
Ascomycota	Henan 2	Liaoning 1	1	-
Ascomycota	Henan 2	Liaoning 2	1	-
Ascomycota	Henan 2	Liaoning 3	1	-
Ascomycota	Henan 2	Shandong 1_1	1	-
Ascomycota	Henan 2	Shandong 1_2	1	-
Ascomycota	Henan 2	Shandong 2	1	-
Ascomycota	Henan 2	Shandong 3	1	-
Ascomycota	Henan 2	Shandong 4	1	-
Ascomycota	Henan 3	Henan 3	1	-
Ascomycota	Henan 3	Liaoning 1	1	-
Ascomycota	Henan 3	Liaoning 2	1	-
Ascomycota	Henan 3	Liaoning 3	1	-
Ascomycota	Henan 3	Shandong 1_1	1	-
Ascomycota	Henan 3	Shandong 1_2	1	-
Ascomycota	Henan 3	Shandong 2	1	-
Ascomycota	Henan 3	Shandong 3	1	-
Ascomycota	Henan 3	Shandong 4	1	-
Ascomycota	Liaoning 1	Liaoning 1	1	-
Ascomycota	Liaoning 1	Liaoning 2	1	-
Ascomycota	Liaoning 1	Liaoning 3	1	-
Ascomycota	Liaoning 1	Shandong 1_1	1	-
Ascomycota	Liaoning 1	Shandong 1_2	1	-
Ascomycota	Liaoning 1	Shandong 2	1	-
Ascomycota	Liaoning 1	Shandong 3	1	-
Ascomycota	Liaoning 1	Shandong 4	1	-
Ascomycota	Liaoning 2	Liaoning 2	1	-
Ascomycota	Liaoning 2	Liaoning 3	1	-
Ascomycota	Liaoning 2	Shandong 1_1	1	-
Ascomycota	Liaoning 2	Shandong 1_2	1	-
Ascomycota	Liaoning 2	Shandong 2	1	-
Ascomycota	Liaoning 2	Shandong 3	1	-
Ascomycota	Liaoning 2	Shandong 4	1	-
Ascomycota	Liaoning 3	Liaoning 3	1	-
Ascomycota	Liaoning 3	Shandong 1_1	1	-
Ascomycota	Liaoning 3	Shandong 1_2	1	-
Ascomycota	Liaoning 3	Shandong 2	1	-
Ascomycota	Liaoning 3	Shandong 3	1	-
Ascomycota	Liaoning 3	Shandong 4	1	-
Ascomycota	Shandong 1_1	Shandong 1_1	1	-
Ascomycota	Shandong 1_1	Shandong 1_2	1	-
Ascomycota	Shandong 1_1	Shandong 2	1	-
Ascomycota	Shandong 1_1	Shandong 4	1	-
Ascomycota	Shandong 1_2	Shandong 1_2	1	-
Ascomycota	Shandong 1_2	Shandong 2	1	-
Ascomycota	Shandong 1_2	Shandong 4	1	-
Ascomycota	Shandong 2	Shandong 2	1	-
Ascomycota	Shandong 2	Shandong 3	1	-
Ascomycota	Shandong 2	Shandong 4	1	-
Ascomycota	Shandong 3	Shandong 3	1	-
Ascomycota	Shandong 3	Shandong 4	1	-
Ascomycota	Shandong 4	Shandong 4	1	-
Basidiomycota	Henan 1	Henan 1	1	-
Basidiomycota	Henan 1	Henan 2	1	-
Basidiomycota	Henan 1	Henan 3	1	-
Basidiomycota	Henan 1	Liaoning 1	1	-
Basidiomycota	Henan 1	Liaoning 2	1	-
Basidiomycota	Henan 1	Liaoning 3	1	-
Basidiomycota	Henan 1	Shandong 1_1	1	-
Basidiomycota	Henan 1	Shandong 1_2	1	-
Basidiomycota	Henan 1	Shandong 2	1	-
Basidiomycota	Henan 1	Shandong 3	1	-
Basidiomycota	Henan 1	Shandong 4	1	-
Basidiomycota	Henan 2	Henan 2	1	-
Basidiomycota	Henan 2	Henan 3	1	-
Basidiomycota	Henan 2	Liaoning 1	1	-
Basidiomycota	Henan 2	Liaoning 2	1	-
Basidiomycota	Henan 2	Liaoning 3	1	-
Basidiomycota	Henan 2	Shandong 1_1	1	-
Basidiomycota	Henan 2	Shandong 1_2	1	-
Basidiomycota	Henan 2	Shandong 2	1	-
Basidiomycota	Henan 2	Shandong 3	1	-
Basidiomycota	Henan 2	Shandong 4	1	-
Basidiomycota	Henan 3	Henan 3	1	-
Basidiomycota	Henan 3	Liaoning 1	1	-
Basidiomycota	Henan 3	Liaoning 2	1	-
Basidiomycota	Henan 3	Liaoning 3	1	-
Basidiomycota	Henan 3	Shandong 1_1	1	-
Basidiomycota	Henan 3	Shandong 1_2	1	-
Basidiomycota	Henan 3	Shandong 2	1	-
Basidiomycota	Henan 3	Shandong 3	1	-
Basidiomycota	Henan 3	Shandong 4	1	-
Basidiomycota	Liaoning 1	Liaoning 1	1	-
Basidiomycota	Liaoning 1	Liaoning 2	1	-
Basidiomycota	Liaoning 1	Liaoning 3	1	-
Basidiomycota	Liaoning 1	Shandong 1_1	1	-
Basidiomycota	Liaoning 1	Shandong 1_2	1	-
Basidiomycota	Liaoning 1	Shandong 2	1	-
Basidiomycota	Liaoning 1	Shandong 3	1	-
Basidiomycota	Liaoning 1	Shandong 4	1	-
Basidiomycota	Liaoning 2	Liaoning 2	1	-
Basidiomycota	Liaoning 2	Liaoning 3	1	-
Basidiomycota	Liaoning 2	Shandong 1_1	1	-
Basidiomycota	Liaoning 2	Shandong 1_2	1	-
Basidiomycota	Liaoning 2	Shandong 2	1	-
Basidiomycota	Liaoning 2	Shandong 3	1	-
Basidiomycota	Liaoning 2	Shandong 4	1	-
Basidiomycota	Liaoning 3	Liaoning 3	1	-
Basidiomycota	Liaoning 3	Shandong 1_1	1	-
Basidiomycota	Liaoning 3	Shandong 1_2	1	-
Basidiomycota	Liaoning 3	Shandong 2	1	-
Basidiomycota	Liaoning 3	Shandong 3	1	-
Basidiomycota	Liaoning 3	Shandong 4	1	-
Basidiomycota	Shandong 1_1	Shandong 1_1	1	-
Basidiomycota	Shandong 1_1	Shandong 1_2	1	-
Basidiomycota	Shandong 1_1	Shandong 2	1	-
Basidiomycota	Shandong 1_1	Shandong 3	1	-
Basidiomycota	Shandong 1_1	Shandong 4	1	-
Basidiomycota	Shandong 1_2	Shandong 1_2	1	-
Basidiomycota	Shandong 1_2	Shandong 2	1	-
Basidiomycota	Shandong 1_2	Shandong 3	1	-
Basidiomycota	Shandong 1_2	Shandong 4	1	-
Basidiomycota	Shandong 2	Shandong 2	1	-
Basidiomycota	Shandong 2	Shandong 3	1	-
Basidiomycota	Shandong 2	Shandong 4	1	-
Basidiomycota	Shandong 3	Shandong 3	1	-
Basidiomycota	Shandong 3	Shandong 4	1	-
Basidiomycota	Shandong 4	Shandong 4	1	-

## Sheet: Source
Phylum	Source 1	Source 2	Adjusted p value (Holm correction)	Relation
Firmicutes	Broiler carcass t3	Broiler faeces t2	3.5856e-30	Increase
Firmicutes	Broiler carcass t3	Broiler faeces t1	3.09031e-25	Increase
Proteobacteria	Broiler carcass t3	Broiler faeces t2	1.39517e-17	Decrease
Planctomycetes	Broiler faeces t1	Soil t2	1.04305e-12	Increase
Planctomycetes	Broiler faeces t2	Soil t2	1.77606e-12	Increase
Planctomycetes	Broiler carcass t3	Soil t2	4.40425e-12	Increase
Firmicutes	Broiler faeces t2	Soil t2	5.1924e-12	Decrease
Actinobacteria	Broiler carcass t3	Soil t2	8.39268e-12	Increase
Firmicutes	Broiler faeces t2	Soil t1	1.25885e-11	Decrease
Firmicutes	Broiler faeces t1	Soil t1	1.36764e-11	Decrease
Actinobacteria	Broiler faeces t2	Soil t2	1.69813e-11	Increase
Firmicutes	Broiler faeces t1	Soil t2	2.03642e-11	Decrease
Actinobacteria	Broiler carcass t3	Soil t1	3.81501e-11	Increase
Actinobacteria	Broiler faeces t1	Soil t2	4.91537e-11	Increase
Actinobacteria	Broiler faeces t2	Soil t1	1.08952e-10	Increase
Proteobacteria	Broiler carcass t3	Broiler faeces t1	1.90152e-10	Decrease
Actinobacteria	Broiler faeces t1	Soil t1	4.3885e-10	Increase
Proteobacteria	Broiler faeces t2	Soil t1	3.9778e-09	Increase
Firmicutes	Broiler faeces t2	Wastewater t3	1.06285e-08	Decrease
Planctomycetes	Broiler faeces t1	Soil t1	7.61501e-08	Increase
Firmicutes	Broiler faeces t1	Wastewater t3	8.40622e-08	Decrease
Proteobacteria	Broiler faeces t2	Soil t2	1.01794e-07	Increase
Planctomycetes	Broiler faeces t2	Soil t1	1.06267e-07	Increase
Firmicutes	Broiler Feather t1	Broiler carcass t3	1.46114e-07	Decrease
Firmicutes	Broiler Feather t2	Broiler carcass t3	1.85044e-07	Decrease
Planctomycetes	Broiler carcass t3	Soil t1	1.88136e-07	Increase
Bacteroidetes	Broiler carcass t3	Broiler faeces t1	6.1812e-07	Decrease
Proteobacteria	Broiler faeces t2	Wastewater t3	8.13419e-07	Increase
Candidatus_Melainabacteria	Broiler Feather t2	Broiler faeces t1	2.01725e-06	Decrease
Candidatus_Melainabacteria	Broiler Feather t2	Broiler carcass t3	2.48408e-06	Decrease
Planctomycetes	Soil t2	Wastewater t3	5.93347e-06	Decrease
Verrucomicrobia	Broiler Feather t2	Broiler faeces t1	9.43065e-06	Decrease
Candidatus_Melainabacteria	Broiler Feather t2	Broiler faeces t2	1.38102e-05	Decrease
Bacteroidetes	Broiler Feather t2	Broiler faeces t1	1.47869e-05	Decrease
Planctomycetes	Broiler Feather t2	Soil t2	1.62895e-05	Increase
Bacteroidetes	Broiler Feather t2	Broiler faeces t2	2.71799e-05	Decrease
Firmicutes	Broiler Feather t2	Soil t1	2.83341e-05	Decrease
Planctomycetes	Broiler Feather t1	Soil t2	4.90544e-05	Increase
Proteobacteria	Broiler Feather t1	Broiler carcass t3	5.27362e-05	Increase
Firmicutes	Broiler Feather t2	Soil t2	7.58391e-05	Decrease
Firmicutes	Broiler carcass t3	Soil t1	7.6271e-05	Decrease
Firmicutes	Broiler Feather t1	Soil t1	7.98064e-05	Decrease
Firmicutes	Broiler Feather t1	Soil t2	9.65298e-05	Decrease
Actinobacteria	Broiler Feather t1	Broiler faeces t1	0.000135063	Decrease
Actinobacteria	Broiler Feather t1	Broiler carcass t3	0.000188743	Decrease
Actinobacteria	Soil t2	Wastewater t3	0.000189084	Decrease
Proteobacteria	Broiler Feather t2	Soil t1	0.000207653	Increase
Actinobacteria	Broiler Feather t1	Broiler faeces t2	0.000209046	Decrease
Proteobacteria	Broiler Feather t1	Soil t1	0.000214262	Increase
Actinobacteria	Barn Floor t2	Broiler carcass t3	0.000240517	Decrease
Firmicutes	Broiler faeces t2	Processing Line t3	0.000255484	Decrease
Actinobacteria	Soil t1	Wastewater t3	0.000356261	Decrease
Chlamydiae	Broiler faeces t2	Wastewater t3	0.000371434	Increase
Actinobacteria	Broiler Feather t2	Broiler carcass t3	0.000447605	Decrease
Verrucomicrobia	Broiler Feather t2	Broiler carcass t3	0.000456521	Decrease
Proteobacteria	Broiler Feather t1	Wastewater t3	0.000459925	Increase
Candidatus_Melainabacteria	Broiler Feather t2	Soil t2	0.000466983	Decrease
Chlamydiae	Broiler faeces t1	Wastewater t3	0.000545607	Increase
Proteobacteria	Broiler faeces t1	Soil t1	0.000576911	Increase
Planctomycetes	Barn Floor t2	Soil t2	0.000613616	Increase
Actinobacteria	Broiler Feather t2	Broiler faeces t1	0.000632928	Decrease
Actinobacteria	Barn Floor t2	Broiler faeces t2	0.000660405	Decrease
Candidatus_Melainabacteria	Broiler Feather t2	Soil t1	0.000727417	Decrease
Actinobacteria	Barn Floor t2	Broiler faeces t1	0.000839844	Decrease
Actinobacteria	Broiler Feather t2	Broiler faeces t2	0.000868813	Decrease
Bacteroidetes	Broiler Feather t2	Wastewater t3	0.000884538	Decrease
Firmicutes	Barn Floor t2	Broiler carcass t3	0.000930597	Decrease
Proteobacteria	Broiler Feather t2	Broiler carcass t3	0.000991014	Increase
Bacteroidetes	Broiler Feather t2	Soil t1	0.00104752	Decrease
Bacteroidetes	Broiler Feather t1	Broiler faeces t1	0.00114588	Decrease
Actinobacteria	Barn Floor t1	Broiler carcass t3	0.00118394	Decrease
Firmicutes	Barn Floor t2	Soil t1	0.00119136	Decrease
Planctomycetes	Processing Line t3	Soil t2	0.00124648	Increase
Proteobacteria	Broiler Feather t1	Soil t2	0.00124796	Increase
Proteobacteria	Broiler Feather t2	Wastewater t3	0.00133556	Increase
Bacteroidetes	Broiler Feather t2	Soil t2	0.00146948	Decrease
Actinobacteria	Broiler Feather t2	Soil t1	0.00169052	Increase
Planctomycetes	Soil t1	Wastewater t3	0.00174571	Decrease
Actinobacteria	Broiler Feather t2	Soil t2	0.00183845	Increase
Candidatus_Melainabacteria	Broiler Feather t2	Wastewater t3	0.00200901	Decrease
Proteobacteria	Broiler Feather t2	Soil t2	0.00205417	Increase
Proteobacteria	Broiler faeces t1	Wastewater t3	0.00207784	Increase
Firmicutes	Barn Floor t2	Soil t2	0.00229041	Decrease
Firmicutes	Broiler faeces t1	Processing Line t3	0.00260193	Decrease
Firmicutes	Broiler Feather t1	Wastewater t3	0.00275448	Decrease
Verrucomicrobia	Broiler Feather t2	Broiler faeces t2	0.00287379	Decrease
Actinobacteria	Barn Floor t1	Broiler faeces t2	0.00339259	Decrease
Planctomycetes	Broiler Feather t2	Soil t1	0.00341202	Increase
Firmicutes	Broiler Feather t2	Wastewater t3	0.00342306	Decrease
Chlamydiae	Broiler faeces t2	Processing Line t3	0.0035016	Increase
Firmicutes	Broiler carcass t3	Soil t2	0.00376724	Decrease
Chlamydiae	Broiler faeces t1	Processing Line t3	0.00387472	Increase
Fusobacteria	Broiler Feather t2	Broiler carcass t3	0.00406208	Decrease
Bacteroidetes	Broiler Feather t1	Broiler faeces t2	0.00438602	Decrease
Actinobacteria	Barn Floor t1	Broiler faeces t1	0.0054495	Decrease
Planctomycetes	Barn Floor t1	Soil t2	0.0057998	Increase
Verrucomicrobia	Broiler Feather t2	Soil t1	0.00603584	Decrease
Bacteroidetes	Broiler Feather t1	Wastewater t3	0.00645033	Decrease
Planctomycetes	Broiler Feather t1	Soil t1	0.00710908	Increase
Chlamydiae	Broiler carcass t3	Broiler faeces t2	0.00793887	Decrease
Firmicutes	Broiler Feather t2	Broiler faeces t2	0.00963296	Increase
Verrucomicrobia	Broiler faeces t1	Broiler faeces t2	0.01298	Increase
Verrucomicrobia	Broiler Feather t2	Soil t2	0.0140715	Decrease
Bacteroidetes	Broiler Feather t1	Soil t1	0.0145978	Decrease
Bacteroidetes	Broiler Feather t1	Soil t2	0.0161049	Decrease
Bacteroidetes	Broiler carcass t3	Broiler faeces t2	0.0172132	Decrease
Firmicutes	Barn Floor t1	Soil t1	0.017398	Decrease
Bacteroidetes	Broiler Feather t2	Broiler carcass t3	0.0178576	Decrease
Bacteroidetes	Barn Floor t1	Broiler Feather t2	0.019294	Increase
Actinobacteria	Processing Line t3	Soil t2	0.0199569	Increase
Verrucomicrobia	Broiler Feather t2	Wastewater t3	0.0216385	Decrease
Proteobacteria	Barn Floor t2	Broiler carcass t3	0.0220524	Increase
Bacteroidetes	Broiler carcass t3	Soil t2	0.0229255	Decrease
Proteobacteria	Broiler faeces t1	Soil t2	0.0232221	Increase
Chlamydiae	Broiler carcass t3	Broiler faeces t1	0.0251938	Decrease
Bacteroidetes	Broiler Feather t2	Processing Line t3	0.0302579	Decrease
Fusobacteria	Broiler Feather t2	Broiler faeces t1	0.0311142	Decrease
Actinobacteria	Processing Line t3	Soil t1	0.031332	Increase
Firmicutes	Barn Floor t2	Wastewater t3	0.0335206	Decrease
Fusobacteria	Broiler Feather t2	Broiler faeces t2	0.0385985	Decrease
Bacteroidetes	Barn Floor t1	Broiler Feather t1	0.0451048	Increase
Planctomycetes	Barn Floor t2	Soil t1	0.0511527	-
Firmicutes	Barn Floor t1	Soil t2	0.0511955	-
Candidatus_Melainabacteria	Broiler Feather t2	Processing Line t3	0.0514884	-
Actinobacteria	Broiler Feather t1	Soil t2	0.0521106	-
Planctomycetes	Processing Line t3	Soil t1	0.0634878	-
Actinobacteria	Broiler carcass t3	Wastewater t3	0.109359	-
Proteobacteria	Barn Floor t2	Soil t1	0.11205	-
Lentisphaerae	Broiler Feather t2	Broiler faeces t1	0.127386	-
Fusobacteria	Broiler Feather t2	Soil t2	0.131399	-
Verrucomicrobia	Broiler Feather t2	Processing Line t3	0.143777	-
Tenericutes	Broiler faeces t2	Wastewater t3	0.14792	-
Firmicutes	Broiler Feather t1	Processing Line t3	0.169817	-
Fusobacteria	Broiler Feather t2	Soil t1	0.171202	-
Firmicutes	Barn Floor t1	Broiler carcass t3	0.172535	-
Proteobacteria	Barn Floor t2	Wastewater t3	0.174626	-
Chlamydiae	Broiler Feather t2	Processing Line t3	0.199438	-
Candidatus_Melainabacteria	Barn Floor t1	Broiler Feather t2	0.202471	-
Chlamydiae	Processing Line t3	Soil t1	0.21265	-
Lentisphaerae	Broiler Feather t2	Broiler carcass t3	0.222276	-
Chlamydiae	Broiler Feather t1	Processing Line t3	0.241593	-
Planctomycetes	Barn Floor t1	Soil t1	0.244179	-
Chlamydiae	Broiler Feather t1	Wastewater t3	0.262077	-
Chlamydiae	Soil t1	Wastewater t3	0.26736	-
Bacteroidetes	Broiler Feather t1	Processing Line t3	0.287355	-
Chlamydiae	Processing Line t3	Soil t2	0.295499	-
Fusobacteria	Broiler Feather t2	Wastewater t3	0.313765	-
Firmicutes	Broiler Feather t2	Processing Line t3	0.321573	-
Firmicutes	Soil t1	Wastewater t3	0.345889	-
Verrucomicrobia	Barn Floor t1	Broiler Feather t2	0.347174	-
Chlamydiae	Broiler Feather t2	Wastewater t3	0.347984	-
Actinobacteria	Broiler Feather t1	Soil t1	0.373535	-
Chlamydiae	Soil t2	Wastewater t3	0.379412	-
Firmicutes	Barn Floor t2	Processing Line t3	0.383651	-
Firmicutes	Barn Floor t1	Wastewater t3	0.398804	-
Firmicutes	Broiler Feather t1	Broiler faeces t2	0.442752	-
Bacteroidetes	Barn Floor t1	Broiler carcass t3	0.463957	-
Bacteroidetes	Barn Floor t2	Broiler Feather t2	0.47635	-
Actinobacteria	Broiler carcass t3	Broiler faeces t2	0.66439	-
Actinobacteria	Broiler faeces t1	Wastewater t3	0.682704	-
Tenericutes	Broiler faeces t1	Wastewater t3	0.806079	-
Proteobacteria	Barn Floor t2	Soil t2	0.884993	-
Euryarchaeota	Barn Floor t1	Barn Floor t1	1	-
Euryarchaeota	Barn Floor t1	Barn Floor t2	1	-
Euryarchaeota	Barn Floor t1	Broiler Feather t1	1	-
Euryarchaeota	Barn Floor t1	Broiler Feather t2	1	-
Euryarchaeota	Barn Floor t1	Broiler carcass t3	1	-
Euryarchaeota	Barn Floor t1	Broiler faeces t1	1	-
Euryarchaeota	Barn Floor t1	Broiler faeces t2	1	-
Euryarchaeota	Barn Floor t1	Processing Line t3	1	-
Euryarchaeota	Barn Floor t1	Soil t1	1	-
Euryarchaeota	Barn Floor t1	Soil t2	1	-
Euryarchaeota	Barn Floor t1	Wastewater t3	1	-
Euryarchaeota	Barn Floor t2	Barn Floor t2	1	-
Euryarchaeota	Barn Floor t2	Broiler Feather t1	1	-
Euryarchaeota	Barn Floor t2	Broiler Feather t2	1	-
Euryarchaeota	Barn Floor t2	Broiler carcass t3	1	-
Euryarchaeota	Barn Floor t2	Broiler faeces t1	1	-
Euryarchaeota	Barn Floor t2	Broiler faeces t2	1	-
Euryarchaeota	Barn Floor t2	Processing Line t3	1	-
Euryarchaeota	Barn Floor t2	Soil t1	1	-
Euryarchaeota	Barn Floor t2	Soil t2	1	-
Euryarchaeota	Barn Floor t2	Wastewater t3	1	-
Euryarchaeota	Broiler Feather t1	Broiler Feather t1	1	-
Euryarchaeota	Broiler Feather t1	Broiler Feather t2	1	-
Euryarchaeota	Broiler Feather t1	Broiler carcass t3	1	-
Euryarchaeota	Broiler Feather t1	Broiler faeces t1	1	-
Euryarchaeota	Broiler Feather t1	Broiler faeces t2	1	-
Euryarchaeota	Broiler Feather t1	Processing Line t3	1	-
Euryarchaeota	Broiler Feather t1	Soil t1	1	-
Euryarchaeota	Broiler Feather t1	Soil t2	1	-
Euryarchaeota	Broiler Feather t1	Wastewater t3	1	-
Euryarchaeota	Broiler Feather t2	Broiler Feather t2	1	-
Euryarchaeota	Broiler Feather t2	Broiler carcass t3	1	-
Euryarchaeota	Broiler Feather t2	Broiler faeces t1	1	-
Euryarchaeota	Broiler Feather t2	Broiler faeces t2	1	-
Euryarchaeota	Broiler Feather t2	Processing Line t3	1	-
Euryarchaeota	Broiler Feather t2	Soil t1	1	-
Euryarchaeota	Broiler Feather t2	Soil t2	1	-
Euryarchaeota	Broiler Feather t2	Wastewater t3	1	-
Euryarchaeota	Broiler carcass t3	Broiler carcass t3	1	-
Euryarchaeota	Broiler carcass t3	Broiler faeces t1	1	-
Euryarchaeota	Broiler carcass t3	Broiler faeces t2	1	-
Euryarchaeota	Broiler carcass t3	Processing Line t3	1	-
Euryarchaeota	Broiler carcass t3	Soil t1	1	-
Euryarchaeota	Broiler carcass t3	Soil t2	1	-
Euryarchaeota	Broiler carcass t3	Wastewater t3	1	-
Euryarchaeota	Broiler faeces t1	Broiler faeces t1	1	-
Euryarchaeota	Broiler faeces t1	Broiler faeces t2	1	-
Euryarchaeota	Broiler faeces t1	Processing Line t3	1	-
Euryarchaeota	Broiler faeces t1	Soil t1	1	-
Euryarchaeota	Broiler faeces t1	Soil t2	1	-
Euryarchaeota	Broiler faeces t1	Wastewater t3	1	-
Euryarchaeota	Broiler faeces t2	Broiler faeces t2	1	-
Euryarchaeota	Broiler faeces t2	Processing Line t3	1	-
Euryarchaeota	Broiler faeces t2	Soil t1	1	-
Euryarchaeota	Broiler faeces t2	Soil t2	1	-
Euryarchaeota	Broiler faeces t2	Wastewater t3	1	-
Euryarchaeota	Processing Line t3	Processing Line t3	1	-
Euryarchaeota	Processing Line t3	Soil t1	1	-
Euryarchaeota	Processing Line t3	Soil t2	1	-
Euryarchaeota	Processing Line t3	Wastewater t3	1	-
Euryarchaeota	Soil t1	Soil t1	1	-
Euryarchaeota	Soil t1	Soil t2	1	-
Euryarchaeota	Soil t1	Wastewater t3	1	-
Euryarchaeota	Soil t2	Soil t2	1	-
Euryarchaeota	Soil t2	Wastewater t3	1	-
Euryarchaeota	Wastewater t3	Wastewater t3	1	-
Thaumarchaeota	Barn Floor t1	Barn Floor t1	1	-
Thaumarchaeota	Barn Floor t1	Barn Floor t2	1	-
Thaumarchaeota	Barn Floor t1	Broiler Feather t1	1	-
Thaumarchaeota	Barn Floor t1	Broiler Feather t2	1	-
Thaumarchaeota	Barn Floor t1	Broiler carcass t3	1	-
Thaumarchaeota	Barn Floor t1	Broiler faeces t1	1	-
Thaumarchaeota	Barn Floor t1	Broiler faeces t2	1	-
Thaumarchaeota	Barn Floor t1	Processing Line t3	1	-
Thaumarchaeota	Barn Floor t1	Soil t1	1	-
Thaumarchaeota	Barn Floor t1	Soil t2	1	-
Thaumarchaeota	Barn Floor t1	Wastewater t3	1	-
Thaumarchaeota	Barn Floor t2	Barn Floor t2	1	-
Thaumarchaeota	Barn Floor t2	Broiler Feather t1	1	-
Thaumarchaeota	Barn Floor t2	Broiler Feather t2	1	-
Thaumarchaeota	Barn Floor t2	Broiler carcass t3	1	-
Thaumarchaeota	Barn Floor t2	Broiler faeces t1	1	-
Thaumarchaeota	Barn Floor t2	Broiler faeces t2	1	-
Thaumarchaeota	Barn Floor t2	Processing Line t3	1	-
Thaumarchaeota	Barn Floor t2	Soil t1	1	-
Thaumarchaeota	Barn Floor t2	Soil t2	1	-
Thaumarchaeota	Barn Floor t2	Wastewater t3	1	-
Thaumarchaeota	Broiler Feather t1	Broiler Feather t1	1	-
Thaumarchaeota	Broiler Feather t1	Broiler Feather t2	1	-
Thaumarchaeota	Broiler Feather t1	Broiler carcass t3	1	-
Thaumarchaeota	Broiler Feather t1	Broiler faeces t1	1	-
Thaumarchaeota	Broiler Feather t1	Broiler faeces t2	1	-
Thaumarchaeota	Broiler Feather t1	Processing Line t3	1	-
Thaumarchaeota	Broiler Feather t1	Soil t1	1	-
Thaumarchaeota	Broiler Feather t1	Soil t2	1	-
Thaumarchaeota	Broiler Feather t1	Wastewater t3	1	-
Thaumarchaeota	Broiler Feather t2	Broiler Feather t2	1	-
Thaumarchaeota	Broiler Feather t2	Broiler carcass t3	1	-
Thaumarchaeota	Broiler Feather t2	Broiler faeces t1	1	-
Thaumarchaeota	Broiler Feather t2	Broiler faeces t2	1	-
Thaumarchaeota	Broiler Feather t2	Processing Line t3	1	-
Thaumarchaeota	Broiler Feather t2	Soil t1	1	-
Thaumarchaeota	Broiler Feather t2	Soil t2	1	-
Thaumarchaeota	Broiler Feather t2	Wastewater t3	1	-
Thaumarchaeota	Broiler carcass t3	Broiler carcass t3	1	-
Thaumarchaeota	Broiler carcass t3	Broiler faeces t1	1	-
Thaumarchaeota	Broiler carcass t3	Broiler faeces t2	1	-
Thaumarchaeota	Broiler carcass t3	Processing Line t3	1	-
Thaumarchaeota	Broiler carcass t3	Soil t1	1	-
Thaumarchaeota	Broiler carcass t3	Soil t2	1	-
Thaumarchaeota	Broiler carcass t3	Wastewater t3	1	-
Thaumarchaeota	Broiler faeces t1	Broiler faeces t1	1	-
Thaumarchaeota	Broiler faeces t1	Broiler faeces t2	1	-
Thaumarchaeota	Broiler faeces t1	Processing Line t3	1	-
Thaumarchaeota	Broiler faeces t1	Soil t1	1	-
Thaumarchaeota	Broiler faeces t1	Soil t2	1	-
Thaumarchaeota	Broiler faeces t1	Wastewater t3	1	-
Thaumarchaeota	Broiler faeces t2	Broiler faeces t2	1	-
Thaumarchaeota	Broiler faeces t2	Processing Line t3	1	-
Thaumarchaeota	Broiler faeces t2	Soil t1	1	-
Thaumarchaeota	Broiler faeces t2	Soil t2	1	-
Thaumarchaeota	Broiler faeces t2	Wastewater t3	1	-
Thaumarchaeota	Processing Line t3	Processing Line t3	1	-
Thaumarchaeota	Processing Line t3	Soil t1	1	-
Thaumarchaeota	Processing Line t3	Soil t2	1	-
Thaumarchaeota	Processing Line t3	Wastewater t3	1	-
Thaumarchaeota	Soil t1	Soil t1	1	-
Thaumarchaeota	Soil t1	Soil t2	1	-
Thaumarchaeota	Soil t1	Wastewater t3	1	-
Thaumarchaeota	Soil t2	Soil t2	1	-
Thaumarchaeota	Soil t2	Wastewater t3	1	-
Thaumarchaeota	Wastewater t3	Wastewater t3	1	-
Actinobacteria	Barn Floor t1	Barn Floor t1	1	-
Actinobacteria	Barn Floor t1	Barn Floor t2	1	-
Actinobacteria	Barn Floor t1	Broiler Feather t1	1	-
Actinobacteria	Barn Floor t1	Broiler Feather t2	1	-
Actinobacteria	Barn Floor t1	Processing Line t3	1	-
Actinobacteria	Barn Floor t1	Soil t1	1	-
Actinobacteria	Barn Floor t1	Soil t2	1	-
Actinobacteria	Barn Floor t1	Wastewater t3	1	-
Actinobacteria	Barn Floor t2	Barn Floor t2	1	-
Actinobacteria	Barn Floor t2	Broiler Feather t1	1	-
Actinobacteria	Barn Floor t2	Broiler Feather t2	1	-
Actinobacteria	Barn Floor t2	Processing Line t3	1	-
Actinobacteria	Barn Floor t2	Soil t1	1	-
Actinobacteria	Barn Floor t2	Soil t2	1	-
Actinobacteria	Barn Floor t2	Wastewater t3	1	-
Actinobacteria	Broiler Feather t1	Broiler Feather t1	1	-
Actinobacteria	Broiler Feather t1	Broiler Feather t2	1	-
Actinobacteria	Broiler Feather t1	Processing Line t3	1	-
Actinobacteria	Broiler Feather t1	Wastewater t3	1	-
Actinobacteria	Broiler Feather t2	Broiler Feather t2	1	-
Actinobacteria	Broiler Feather t2	Processing Line t3	1	-
Actinobacteria	Broiler Feather t2	Wastewater t3	1	-
Actinobacteria	Broiler carcass t3	Broiler carcass t3	1	-
Actinobacteria	Broiler carcass t3	Broiler faeces t1	1	-
Actinobacteria	Broiler carcass t3	Processing Line t3	1	-
Actinobacteria	Broiler faeces t1	Broiler faeces t1	1	-
Actinobacteria	Broiler faeces t1	Broiler faeces t2	1	-
Actinobacteria	Broiler faeces t1	Processing Line t3	1	-
Actinobacteria	Broiler faeces t2	Broiler faeces t2	1	-
Actinobacteria	Broiler faeces t2	Processing Line t3	1	-
Actinobacteria	Broiler faeces t2	Wastewater t3	1	-
Actinobacteria	Processing Line t3	Processing Line t3	1	-
Actinobacteria	Processing Line t3	Wastewater t3	1	-
Actinobacteria	Soil t1	Soil t1	1	-
Actinobacteria	Soil t1	Soil t2	1	-
Actinobacteria	Soil t2	Soil t2	1	-
Actinobacteria	Wastewater t3	Wastewater t3	1	-
Bacteroidetes	Barn Floor t1	Barn Floor t1	1	-
Bacteroidetes	Barn Floor t1	Barn Floor t2	1	-
Bacteroidetes	Barn Floor t1	Broiler faeces t1	1	-
Bacteroidetes	Barn Floor t1	Broiler faeces t2	1	-
Bacteroidetes	Barn Floor t1	Processing Line t3	1	-
Bacteroidetes	Barn Floor t1	Soil t1	1	-
Bacteroidetes	Barn Floor t1	Soil t2	1	-
Bacteroidetes	Barn Floor t1	Wastewater t3	1	-
Bacteroidetes	Barn Floor t2	Barn Floor t2	1	-
Bacteroidetes	Barn Floor t2	Broiler Feather t1	1	-
Bacteroidetes	Barn Floor t2	Broiler carcass t3	1	-
Bacteroidetes	Barn Floor t2	Broiler faeces t1	1	-
Bacteroidetes	Barn Floor t2	Broiler faeces t2	1	-
Bacteroidetes	Barn Floor t2	Processing Line t3	1	-
Bacteroidetes	Barn Floor t2	Soil t1	1	-
Bacteroidetes	Barn Floor t2	Soil t2	1	-
Bacteroidetes	Barn Floor t2	Wastewater t3	1	-
Bacteroidetes	Broiler Feather t1	Broiler Feather t1	1	-
Bacteroidetes	Broiler Feather t1	Broiler Feather t2	1	-
Bacteroidetes	Broiler Feather t1	Broiler carcass t3	1	-
Bacteroidetes	Broiler Feather t2	Broiler Feather t2	1	-
Bacteroidetes	Broiler carcass t3	Broiler carcass t3	1	-
Bacteroidetes	Broiler carcass t3	Processing Line t3	1	-
Bacteroidetes	Broiler carcass t3	Soil t1	1	-
Bacteroidetes	Broiler carcass t3	Wastewater t3	1	-
Bacteroidetes	Broiler faeces t1	Broiler faeces t1	1	-
Bacteroidetes	Broiler faeces t1	Broiler faeces t2	1	-
Bacteroidetes	Broiler faeces t1	Processing Line t3	1	-
Bacteroidetes	Broiler faeces t1	Soil t1	1	-
Bacteroidetes	Broiler faeces t1	Soil t2	1	-
Bacteroidetes	Broiler faeces t1	Wastewater t3	1	-
Bacteroidetes	Broiler faeces t2	Broiler faeces t2	1	-
Bacteroidetes	Broiler faeces t2	Processing Line t3	1	-
Bacteroidetes	Broiler faeces t2	Soil t1	1	-
Bacteroidetes	Broiler faeces t2	Soil t2	1	-
Bacteroidetes	Broiler faeces t2	Wastewater t3	1	-
Bacteroidetes	Processing Line t3	Processing Line t3	1	-
Bacteroidetes	Processing Line t3	Soil t1	1	-
Bacteroidetes	Processing Line t3	Soil t2	1	-
Bacteroidetes	Processing Line t3	Wastewater t3	1	-
Bacteroidetes	Soil t1	Soil t1	1	-
Bacteroidetes	Soil t1	Soil t2	1	-
Bacteroidetes	Soil t1	Wastewater t3	1	-
Bacteroidetes	Soil t2	Soil t2	1	-
Bacteroidetes	Soil t2	Wastewater t3	1	-
Bacteroidetes	Wastewater t3	Wastewater t3	1	-
Candidatus_Melainabacteria	Barn Floor t1	Barn Floor t1	1	-
Candidatus_Melainabacteria	Barn Floor t1	Barn Floor t2	1	-
Candidatus_Melainabacteria	Barn Floor t1	Broiler Feather t1	1	-
Candidatus_Melainabacteria	Barn Floor t1	Broiler carcass t3	1	-
Candidatus_Melainabacteria	Barn Floor t1	Broiler faeces t1	1	-
Candidatus_Melainabacteria	Barn Floor t1	Broiler faeces t2	1	-
Candidatus_Melainabacteria	Barn Floor t1	Processing Line t3	1	-
Candidatus_Melainabacteria	Barn Floor t1	Soil t1	1	-
Candidatus_Melainabacteria	Barn Floor t1	Soil t2	1	-
Candidatus_Melainabacteria	Barn Floor t1	Wastewater t3	1	-
Candidatus_Melainabacteria	Barn Floor t2	Barn Floor t2	1	-
Candidatus_Melainabacteria	Barn Floor t2	Broiler Feather t1	1	-
Candidatus_Melainabacteria	Barn Floor t2	Broiler Feather t2	1	-
Candidatus_Melainabacteria	Barn Floor t2	Broiler carcass t3	1	-
Candidatus_Melainabacteria	Barn Floor t2	Broiler faeces t1	1	-
Candidatus_Melainabacteria	Barn Floor t2	Broiler faeces t2	1	-
Candidatus_Melainabacteria	Barn Floor t2	Processing Line t3	1	-
Candidatus_Melainabacteria	Barn Floor t2	Soil t1	1	-
Candidatus_Melainabacteria	Barn Floor t2	Soil t2	1	-
Candidatus_Melainabacteria	Barn Floor t2	Wastewater t3	1	-
Candidatus_Melainabacteria	Broiler Feather t1	Broiler Feather t1	1	-
Candidatus_Melainabacteria	Broiler Feather t1	Broiler Feather t2	1	-
Candidatus_Melainabacteria	Broiler Feather t1	Broiler carcass t3	1	-
Candidatus_Melainabacteria	Broiler Feather t1	Broiler faeces t1	1	-
Candidatus_Melainabacteria	Broiler Feather t1	Broiler faeces t2	1	-
Candidatus_Melainabacteria	Broiler Feather t1	Processing Line t3	1	-
Candidatus_Melainabacteria	Broiler Feather t1	Soil t1	1	-
Candidatus_Melainabacteria	Broiler Feather t1	Soil t2	1	-
Candidatus_Melainabacteria	Broiler Feather t1	Wastewater t3	1	-
Candidatus_Melainabacteria	Broiler Feather t2	Broiler Feather t2	1	-
Candidatus_Melainabacteria	Broiler carcass t3	Broiler carcass t3	1	-
Candidatus_Melainabacteria	Broiler carcass t3	Broiler faeces t1	1	-
Candidatus_Melainabacteria	Broiler carcass t3	Broiler faeces t2	1	-
Candidatus_Melainabacteria	Broiler carcass t3	Processing Line t3	1	-
Candidatus_Melainabacteria	Broiler carcass t3	Soil t1	1	-
Candidatus_Melainabacteria	Broiler carcass t3	Soil t2	1	-
Candidatus_Melainabacteria	Broiler carcass t3	Wastewater t3	1	-
Candidatus_Melainabacteria	Broiler faeces t1	Broiler faeces t1	1	-
Candidatus_Melainabacteria	Broiler faeces t1	Broiler faeces t2	1	-
Candidatus_Melainabacteria	Broiler faeces t1	Processing Line t3	1	-
Candidatus_Melainabacteria	Broiler faeces t1	Soil t1	1	-
Candidatus_Melainabacteria	Broiler faeces t1	Soil t2	1	-
Candidatus_Melainabacteria	Broiler faeces t1	Wastewater t3	1	-
Candidatus_Melainabacteria	Broiler faeces t2	Broiler faeces t2	1	-
Candidatus_Melainabacteria	Broiler faeces t2	Processing Line t3	1	-
Candidatus_Melainabacteria	Broiler faeces t2	Soil t1	1	-
Candidatus_Melainabacteria	Broiler faeces t2	Soil t2	1	-
Candidatus_Melainabacteria	Broiler faeces t2	Wastewater t3	1	-
Candidatus_Melainabacteria	Processing Line t3	Processing Line t3	1	-
Candidatus_Melainabacteria	Processing Line t3	Soil t1	1	-
Candidatus_Melainabacteria	Processing Line t3	Soil t2	1	-
Candidatus_Melainabacteria	Processing Line t3	Wastewater t3	1	-
Candidatus_Melainabacteria	Soil t1	Soil t1	1	-
Candidatus_Melainabacteria	Soil t1	Soil t2	1	-
Candidatus_Melainabacteria	Soil t1	Wastewater t3	1	-
Candidatus_Melainabacteria	Soil t2	Soil t2	1	-
Candidatus_Melainabacteria	Soil t2	Wastewater t3	1	-
Candidatus_Melainabacteria	Wastewater t3	Wastewater t3	1	-
Chlamydiae	Barn Floor t1	Barn Floor t1	1	-
Chlamydiae	Barn Floor t1	Barn Floor t2	1	-
Chlamydiae	Barn Floor t1	Broiler Feather t1	1	-
Chlamydiae	Barn Floor t1	Broiler Feather t2	1	-
Chlamydiae	Barn Floor t1	Broiler carcass t3	1	-
Chlamydiae	Barn Floor t1	Broiler faeces t1	1	-
Chlamydiae	Barn Floor t1	Broiler faeces t2	1	-
Chlamydiae	Barn Floor t1	Processing Line t3	1	-
Chlamydiae	Barn Floor t1	Soil t1	1	-
Chlamydiae	Barn Floor t1	Soil t2	1	-
Chlamydiae	Barn Floor t1	Wastewater t3	1	-
Chlamydiae	Barn Floor t2	Barn Floor t2	1	-
Chlamydiae	Barn Floor t2	Broiler Feather t1	1	-
Chlamydiae	Barn Floor t2	Broiler Feather t2	1	-
Chlamydiae	Barn Floor t2	Broiler carcass t3	1	-
Chlamydiae	Barn Floor t2	Broiler faeces t1	1	-
Chlamydiae	Barn Floor t2	Broiler faeces t2	1	-
Chlamydiae	Barn Floor t2	Processing Line t3	1	-
Chlamydiae	Barn Floor t2	Soil t1	1	-
Chlamydiae	Barn Floor t2	Soil t2	1	-
Chlamydiae	Barn Floor t2	Wastewater t3	1	-
Chlamydiae	Broiler Feather t1	Broiler Feather t1	1	-
Chlamydiae	Broiler Feather t1	Broiler Feather t2	1	-
Chlamydiae	Broiler Feather t1	Broiler carcass t3	1	-
Chlamydiae	Broiler Feather t1	Broiler faeces t1	1	-
Chlamydiae	Broiler Feather t1	Broiler faeces t2	1	-
Chlamydiae	Broiler Feather t1	Soil t1	1	-
Chlamydiae	Broiler Feather t1	Soil t2	1	-
Chlamydiae	Broiler Feather t2	Broiler Feather t2	1	-
Chlamydiae	Broiler Feather t2	Broiler carcass t3	1	-
Chlamydiae	Broiler Feather t2	Broiler faeces t1	1	-
Chlamydiae	Broiler Feather t2	Broiler faeces t2	1	-
Chlamydiae	Broiler Feather t2	Soil t1	1	-
Chlamydiae	Broiler Feather t2	Soil t2	1	-
Chlamydiae	Broiler carcass t3	Broiler carcass t3	1	-
Chlamydiae	Broiler carcass t3	Processing Line t3	1	-
Chlamydiae	Broiler carcass t3	Soil t1	1	-
Chlamydiae	Broiler carcass t3	Soil t2	1	-
Chlamydiae	Broiler carcass t3	Wastewater t3	1	-
Chlamydiae	Broiler faeces t1	Broiler faeces t1	1	-
Chlamydiae	Broiler faeces t1	Broiler faeces t2	1	-
Chlamydiae	Broiler faeces t1	Soil t1	1	-
Chlamydiae	Broiler faeces t1	Soil t2	1	-
Chlamydiae	Broiler faeces t2	Broiler faeces t2	1	-
Chlamydiae	Broiler faeces t2	Soil t1	1	-
Chlamydiae	Broiler faeces t2	Soil t2	1	-
Chlamydiae	Processing Line t3	Processing Line t3	1	-
Chlamydiae	Processing Line t3	Wastewater t3	1	-
Chlamydiae	Soil t1	Soil t1	1	-
Chlamydiae	Soil t1	Soil t2	1	-
Chlamydiae	Soil t2	Soil t2	1	-
Chlamydiae	Wastewater t3	Wastewater t3	1	-
Chloroflexi	Barn Floor t1	Barn Floor t1	1	-
Chloroflexi	Barn Floor t1	Barn Floor t2	1	-
Chloroflexi	Barn Floor t1	Broiler Feather t1	1	-
Chloroflexi	Barn Floor t1	Broiler Feather t2	1	-
Chloroflexi	Barn Floor t1	Broiler carcass t3	1	-
Chloroflexi	Barn Floor t1	Broiler faeces t1	1	-
Chloroflexi	Barn Floor t1	Broiler faeces t2	1	-
Chloroflexi	Barn Floor t1	Processing Line t3	1	-
Chloroflexi	Barn Floor t1	Soil t1	1	-
Chloroflexi	Barn Floor t1	Soil t2	1	-
Chloroflexi	Barn Floor t1	Wastewater t3	1	-
Chloroflexi	Barn Floor t2	Barn Floor t2	1	-
Chloroflexi	Barn Floor t2	Broiler Feather t1	1	-
Chloroflexi	Barn Floor t2	Broiler Feather t2	1	-
Chloroflexi	Barn Floor t2	Broiler carcass t3	1	-
Chloroflexi	Barn Floor t2	Broiler faeces t1	1	-
Chloroflexi	Barn Floor t2	Broiler faeces t2	1	-
Chloroflexi	Barn Floor t2	Processing Line t3	1	-
Chloroflexi	Barn Floor t2	Soil t1	1	-
Chloroflexi	Barn Floor t2	Soil t2	1	-
Chloroflexi	Barn Floor t2	Wastewater t3	1	-
Chloroflexi	Broiler Feather t1	Broiler Feather t1	1	-
Chloroflexi	Broiler Feather t1	Broiler Feather t2	1	-
Chloroflexi	Broiler Feather t1	Broiler carcass t3	1	-
Chloroflexi	Broiler Feather t1	Broiler faeces t1	1	-
Chloroflexi	Broiler Feather t1	Broiler faeces t2	1	-
Chloroflexi	Broiler Feather t1	Processing Line t3	1	-
Chloroflexi	Broiler Feather t1	Soil t1	1	-
Chloroflexi	Broiler Feather t1	Soil t2	1	-
Chloroflexi	Broiler Feather t1	Wastewater t3	1	-
Chloroflexi	Broiler Feather t2	Broiler Feather t2	1	-
Chloroflexi	Broiler Feather t2	Broiler carcass t3	1	-
Chloroflexi	Broiler Feather t2	Broiler faeces t1	1	-
Chloroflexi	Broiler Feather t2	Broiler faeces t2	1	-
Chloroflexi	Broiler Feather t2	Processing Line t3	1	-
Chloroflexi	Broiler Feather t2	Soil t1	1	-
Chloroflexi	Broiler Feather t2	Soil t2	1	-
Chloroflexi	Broiler Feather t2	Wastewater t3	1	-
Chloroflexi	Broiler carcass t3	Broiler carcass t3	1	-
Chloroflexi	Broiler carcass t3	Broiler faeces t1	1	-
Chloroflexi	Broiler carcass t3	Broiler faeces t2	1	-
Chloroflexi	Broiler carcass t3	Processing Line t3	1	-
Chloroflexi	Broiler carcass t3	Soil t1	1	-
Chloroflexi	Broiler carcass t3	Soil t2	1	-
Chloroflexi	Broiler carcass t3	Wastewater t3	1	-
Chloroflexi	Broiler faeces t1	Broiler faeces t1	1	-
Chloroflexi	Broiler faeces t1	Broiler faeces t2	1	-
Chloroflexi	Broiler faeces t1	Processing Line t3	1	-
Chloroflexi	Broiler faeces t1	Soil t1	1	-
Chloroflexi	Broiler faeces t1	Soil t2	1	-
Chloroflexi	Broiler faeces t1	Wastewater t3	1	-
Chloroflexi	Broiler faeces t2	Broiler faeces t2	1	-
Chloroflexi	Broiler faeces t2	Processing Line t3	1	-
Chloroflexi	Broiler faeces t2	Soil t1	1	-
Chloroflexi	Broiler faeces t2	Soil t2	1	-
Chloroflexi	Broiler faeces t2	Wastewater t3	1	-
Chloroflexi	Processing Line t3	Processing Line t3	1	-
Chloroflexi	Processing Line t3	Soil t1	1	-
Chloroflexi	Processing Line t3	Soil t2	1	-
Chloroflexi	Processing Line t3	Wastewater t3	1	-
Chloroflexi	Soil t1	Soil t1	1	-
Chloroflexi	Soil t1	Soil t2	1	-
Chloroflexi	Soil t1	Wastewater t3	1	-
Chloroflexi	Soil t2	Soil t2	1	-
Chloroflexi	Soil t2	Wastewater t3	1	-
Chloroflexi	Wastewater t3	Wastewater t3	1	-
Cyanobacteria	Barn Floor t1	Barn Floor t1	1	-
Cyanobacteria	Barn Floor t1	Barn Floor t2	1	-
Cyanobacteria	Barn Floor t1	Broiler Feather t1	1	-
Cyanobacteria	Barn Floor t1	Broiler Feather t2	1	-
Cyanobacteria	Barn Floor t1	Broiler carcass t3	1	-
Cyanobacteria	Barn Floor t1	Broiler faeces t1	1	-
Cyanobacteria	Barn Floor t1	Broiler faeces t2	1	-
Cyanobacteria	Barn Floor t1	Processing Line t3	1	-
Cyanobacteria	Barn Floor t1	Soil t1	1	-
Cyanobacteria	Barn Floor t1	Soil t2	1	-
Cyanobacteria	Barn Floor t1	Wastewater t3	1	-
Cyanobacteria	Barn Floor t2	Barn Floor t2	1	-
Cyanobacteria	Barn Floor t2	Broiler Feather t1	1	-
Cyanobacteria	Barn Floor t2	Broiler Feather t2	1	-
Cyanobacteria	Barn Floor t2	Broiler carcass t3	1	-
Cyanobacteria	Barn Floor t2	Broiler faeces t1	1	-
Cyanobacteria	Barn Floor t2	Broiler faeces t2	1	-
Cyanobacteria	Barn Floor t2	Processing Line t3	1	-
Cyanobacteria	Barn Floor t2	Soil t1	1	-
Cyanobacteria	Barn Floor t2	Soil t2	1	-
Cyanobacteria	Barn Floor t2	Wastewater t3	1	-
Cyanobacteria	Broiler Feather t1	Broiler Feather t1	1	-
Cyanobacteria	Broiler Feather t1	Broiler Feather t2	1	-
Cyanobacteria	Broiler Feather t1	Broiler carcass t3	1	-
Cyanobacteria	Broiler Feather t1	Broiler faeces t1	1	-
Cyanobacteria	Broiler Feather t1	Broiler faeces t2	1	-
Cyanobacteria	Broiler Feather t1	Processing Line t3	1	-
Cyanobacteria	Broiler Feather t1	Soil t1	1	-
Cyanobacteria	Broiler Feather t1	Soil t2	1	-
Cyanobacteria	Broiler Feather t1	Wastewater t3	1	-
Cyanobacteria	Broiler Feather t2	Broiler Feather t2	1	-
Cyanobacteria	Broiler Feather t2	Broiler carcass t3	1	-
Cyanobacteria	Broiler Feather t2	Broiler faeces t1	1	-
Cyanobacteria	Broiler Feather t2	Broiler faeces t2	1	-
Cyanobacteria	Broiler Feather t2	Processing Line t3	1	-
Cyanobacteria	Broiler Feather t2	Soil t1	1	-
Cyanobacteria	Broiler Feather t2	Soil t2	1	-
Cyanobacteria	Broiler Feather t2	Wastewater t3	1	-
Cyanobacteria	Broiler carcass t3	Broiler carcass t3	1	-
Cyanobacteria	Broiler carcass t3	Broiler faeces t1	1	-
Cyanobacteria	Broiler carcass t3	Broiler faeces t2	1	-
Cyanobacteria	Broiler carcass t3	Processing Line t3	1	-
Cyanobacteria	Broiler carcass t3	Soil t1	1	-
Cyanobacteria	Broiler carcass t3	Soil t2	1	-
Cyanobacteria	Broiler carcass t3	Wastewater t3	1	-
Cyanobacteria	Broiler faeces t1	Broiler faeces t1	1	-
Cyanobacteria	Broiler faeces t1	Broiler faeces t2	1	-
Cyanobacteria	Broiler faeces t1	Processing Line t3	1	-
Cyanobacteria	Broiler faeces t1	Soil t1	1	-
Cyanobacteria	Broiler faeces t1	Soil t2	1	-
Cyanobacteria	Broiler faeces t1	Wastewater t3	1	-
Cyanobacteria	Broiler faeces t2	Broiler faeces t2	1	-
Cyanobacteria	Broiler faeces t2	Processing Line t3	1	-
Cyanobacteria	Broiler faeces t2	Soil t1	1	-
Cyanobacteria	Broiler faeces t2	Soil t2	1	-
Cyanobacteria	Broiler faeces t2	Wastewater t3	1	-
Cyanobacteria	Processing Line t3	Processing Line t3	1	-
Cyanobacteria	Processing Line t3	Soil t1	1	-
Cyanobacteria	Processing Line t3	Soil t2	1	-
Cyanobacteria	Processing Line t3	Wastewater t3	1	-
Cyanobacteria	Soil t1	Soil t1	1	-
Cyanobacteria	Soil t1	Soil t2	1	-
Cyanobacteria	Soil t1	Wastewater t3	1	-
Cyanobacteria	Soil t2	Soil t2	1	-
Cyanobacteria	Soil t2	Wastewater t3	1	-
Cyanobacteria	Wastewater t3	Wastewater t3	1	-
Deinococcus_Thermus	Barn Floor t1	Barn Floor t1	1	-
Deinococcus_Thermus	Barn Floor t1	Barn Floor t2	1	-
Deinococcus_Thermus	Barn Floor t1	Broiler Feather t1	1	-
Deinococcus_Thermus	Barn Floor t1	Broiler Feather t2	1	-
Deinococcus_Thermus	Barn Floor t1	Broiler carcass t3	1	-
Deinococcus_Thermus	Barn Floor t1	Broiler faeces t1	1	-
Deinococcus_Thermus	Barn Floor t1	Broiler faeces t2	1	-
Deinococcus_Thermus	Barn Floor t1	Processing Line t3	1	-
Deinococcus_Thermus	Barn Floor t1	Soil t1	1	-
Deinococcus_Thermus	Barn Floor t1	Soil t2	1	-
Deinococcus_Thermus	Barn Floor t1	Wastewater t3	1	-
Deinococcus_Thermus	Barn Floor t2	Barn Floor t2	1	-
Deinococcus_Thermus	Barn Floor t2	Broiler Feather t1	1	-
Deinococcus_Thermus	Barn Floor t2	Broiler Feather t2	1	-
Deinococcus_Thermus	Barn Floor t2	Broiler carcass t3	1	-
Deinococcus_Thermus	Barn Floor t2	Broiler faeces t1	1	-
Deinococcus_Thermus	Barn Floor t2	Broiler faeces t2	1	-
Deinococcus_Thermus	Barn Floor t2	Processing Line t3	1	-
Deinococcus_Thermus	Barn Floor t2	Soil t1	1	-
Deinococcus_Thermus	Barn Floor t2	Soil t2	1	-
Deinococcus_Thermus	Barn Floor t2	Wastewater t3	1	-
Deinococcus_Thermus	Broiler Feather t1	Broiler Feather t1	1	-
Deinococcus_Thermus	Broiler Feather t1	Broiler Feather t2	1	-
Deinococcus_Thermus	Broiler Feather t1	Broiler carcass t3	1	-
Deinococcus_Thermus	Broiler Feather t1	Broiler faeces t1	1	-
Deinococcus_Thermus	Broiler Feather t1	Broiler faeces t2	1	-
Deinococcus_Thermus	Broiler Feather t1	Processing Line t3	1	-
Deinococcus_Thermus	Broiler Feather t1	Soil t1	1	-
Deinococcus_Thermus	Broiler Feather t1	Soil t2	1	-
Deinococcus_Thermus	Broiler Feather t1	Wastewater t3	1	-
Deinococcus_Thermus	Broiler Feather t2	Broiler Feather t2	1	-
Deinococcus_Thermus	Broiler Feather t2	Broiler carcass t3	1	-
Deinococcus_Thermus	Broiler Feather t2	Broiler faeces t1	1	-
Deinococcus_Thermus	Broiler Feather t2	Broiler faeces t2	1	-
Deinococcus_Thermus	Broiler Feather t2	Processing Line t3	1	-
Deinococcus_Thermus	Broiler Feather t2	Soil t1	1	-
Deinococcus_Thermus	Broiler Feather t2	Soil t2	1	-
Deinococcus_Thermus	Broiler Feather t2	Wastewater t3	1	-
Deinococcus_Thermus	Broiler carcass t3	Broiler carcass t3	1	-
Deinococcus_Thermus	Broiler carcass t3	Broiler faeces t1	1	-
Deinococcus_Thermus	Broiler carcass t3	Broiler faeces t2	1	-
Deinococcus_Thermus	Broiler carcass t3	Processing Line t3	1	-
Deinococcus_Thermus	Broiler carcass t3	Soil t1	1	-
Deinococcus_Thermus	Broiler carcass t3	Soil t2	1	-
Deinococcus_Thermus	Broiler carcass t3	Wastewater t3	1	-
Deinococcus_Thermus	Broiler faeces t1	Broiler faeces t1	1	-
Deinococcus_Thermus	Broiler faeces t1	Broiler faeces t2	1	-
Deinococcus_Thermus	Broiler faeces t1	Processing Line t3	1	-
Deinococcus_Thermus	Broiler faeces t1	Soil t1	1	-
Deinococcus_Thermus	Broiler faeces t1	Soil t2	1	-
Deinococcus_Thermus	Broiler faeces t1	Wastewater t3	1	-
Deinococcus_Thermus	Broiler faeces t2	Broiler faeces t2	1	-
Deinococcus_Thermus	Broiler faeces t2	Processing Line t3	1	-
Deinococcus_Thermus	Broiler faeces t2	Soil t1	1	-
Deinococcus_Thermus	Broiler faeces t2	Soil t2	1	-
Deinococcus_Thermus	Broiler faeces t2	Wastewater t3	1	-
Deinococcus_Thermus	Processing Line t3	Processing Line t3	1	-
Deinococcus_Thermus	Processing Line t3	Soil t1	1	-
Deinococcus_Thermus	Processing Line t3	Soil t2	1	-
Deinococcus_Thermus	Processing Line t3	Wastewater t3	1	-
Deinococcus_Thermus	Soil t1	Soil t1	1	-
Deinococcus_Thermus	Soil t1	Soil t2	1	-
Deinococcus_Thermus	Soil t1	Wastewater t3	1	-
Deinococcus_Thermus	Soil t2	Soil t2	1	-
Deinococcus_Thermus	Soil t2	Wastewater t3	1	-
Deinococcus_Thermus	Wastewater t3	Wastewater t3	1	-
Firmicutes	Barn Floor t1	Barn Floor t1	1	-
Firmicutes	Barn Floor t1	Barn Floor t2	1	-
Firmicutes	Barn Floor t1	Broiler Feather t1	1	-
Firmicutes	Barn Floor t1	Broiler Feather t2	1	-
Firmicutes	Barn Floor t1	Broiler faeces t1	1	-
Firmicutes	Barn Floor t1	Broiler faeces t2	1	-
Firmicutes	Barn Floor t1	Processing Line t3	1	-
Firmicutes	Barn Floor t2	Barn Floor t2	1	-
Firmicutes	Barn Floor t2	Broiler Feather t1	1	-
Firmicutes	Barn Floor t2	Broiler Feather t2	1	-
Firmicutes	Barn Floor t2	Broiler faeces t1	1	-
Firmicutes	Barn Floor t2	Broiler faeces t2	1	-
Firmicutes	Broiler Feather t1	Broiler Feather t1	1	-
Firmicutes	Broiler Feather t1	Broiler Feather t2	1	-
Firmicutes	Broiler Feather t1	Broiler faeces t1	1	-
Firmicutes	Broiler Feather t2	Broiler Feather t2	1	-
Firmicutes	Broiler Feather t2	Broiler faeces t1	1	-
Firmicutes	Broiler carcass t3	Broiler carcass t3	1	-
Firmicutes	Broiler carcass t3	Processing Line t3	1	-
Firmicutes	Broiler carcass t3	Wastewater t3	1	-
Firmicutes	Broiler faeces t1	Broiler faeces t1	1	-
Firmicutes	Broiler faeces t1	Broiler faeces t2	1	-
Firmicutes	Broiler faeces t2	Broiler faeces t2	1	-
Firmicutes	Processing Line t3	Processing Line t3	1	-
Firmicutes	Processing Line t3	Soil t1	1	-
Firmicutes	Processing Line t3	Soil t2	1	-
Firmicutes	Processing Line t3	Wastewater t3	1	-
Firmicutes	Soil t1	Soil t1	1	-
Firmicutes	Soil t1	Soil t2	1	-
Firmicutes	Soil t2	Soil t2	1	-
Firmicutes	Soil t2	Wastewater t3	1	-
Firmicutes	Wastewater t3	Wastewater t3	1	-
Fusobacteria	Barn Floor t1	Barn Floor t1	1	-
Fusobacteria	Barn Floor t1	Barn Floor t2	1	-
Fusobacteria	Barn Floor t1	Broiler Feather t1	1	-
Fusobacteria	Barn Floor t1	Broiler Feather t2	1	-
Fusobacteria	Barn Floor t1	Broiler carcass t3	1	-
Fusobacteria	Barn Floor t1	Broiler faeces t1	1	-
Fusobacteria	Barn Floor t1	Broiler faeces t2	1	-
Fusobacteria	Barn Floor t1	Processing Line t3	1	-
Fusobacteria	Barn Floor t1	Soil t1	1	-
Fusobacteria	Barn Floor t1	Soil t2	1	-
Fusobacteria	Barn Floor t1	Wastewater t3	1	-
Fusobacteria	Barn Floor t2	Barn Floor t2	1	-
Fusobacteria	Barn Floor t2	Broiler Feather t1	1	-
Fusobacteria	Barn Floor t2	Broiler Feather t2	1	-
Fusobacteria	Barn Floor t2	Broiler carcass t3	1	-
Fusobacteria	Barn Floor t2	Broiler faeces t1	1	-
Fusobacteria	Barn Floor t2	Broiler faeces t2	1	-
Fusobacteria	Barn Floor t2	Processing Line t3	1	-
Fusobacteria	Barn Floor t2	Soil t1	1	-
Fusobacteria	Barn Floor t2	Soil t2	1	-
Fusobacteria	Barn Floor t2	Wastewater t3	1	-
Fusobacteria	Broiler Feather t1	Broiler Feather t1	1	-
Fusobacteria	Broiler Feather t1	Broiler Feather t2	1	-
Fusobacteria	Broiler Feather t1	Broiler carcass t3	1	-
Fusobacteria	Broiler Feather t1	Broiler faeces t1	1	-
Fusobacteria	Broiler Feather t1	Broiler faeces t2	1	-
Fusobacteria	Broiler Feather t1	Processing Line t3	1	-
Fusobacteria	Broiler Feather t1	Soil t1	1	-
Fusobacteria	Broiler Feather t1	Soil t2	1	-
Fusobacteria	Broiler Feather t1	Wastewater t3	1	-
Fusobacteria	Broiler Feather t2	Broiler Feather t2	1	-
Fusobacteria	Broiler Feather t2	Processing Line t3	1	-
Fusobacteria	Broiler carcass t3	Broiler carcass t3	1	-
Fusobacteria	Broiler carcass t3	Broiler faeces t1	1	-
Fusobacteria	Broiler carcass t3	Broiler faeces t2	1	-
Fusobacteria	Broiler carcass t3	Processing Line t3	1	-
Fusobacteria	Broiler carcass t3	Soil t1	1	-
Fusobacteria	Broiler carcass t3	Soil t2	1	-
Fusobacteria	Broiler carcass t3	Wastewater t3	1	-
Fusobacteria	Broiler faeces t1	Broiler faeces t1	1	-
Fusobacteria	Broiler faeces t1	Broiler faeces t2	1	-
Fusobacteria	Broiler faeces t1	Processing Line t3	1	-
Fusobacteria	Broiler faeces t1	Soil t1	1	-
Fusobacteria	Broiler faeces t1	Soil t2	1	-
Fusobacteria	Broiler faeces t1	Wastewater t3	1	-
Fusobacteria	Broiler faeces t2	Broiler faeces t2	1	-
Fusobacteria	Broiler faeces t2	Processing Line t3	1	-
Fusobacteria	Broiler faeces t2	Soil t1	1	-
Fusobacteria	Broiler faeces t2	Soil t2	1	-
Fusobacteria	Broiler faeces t2	Wastewater t3	1	-
Fusobacteria	Processing Line t3	Processing Line t3	1	-
Fusobacteria	Processing Line t3	Soil t1	1	-
Fusobacteria	Processing Line t3	Soil t2	1	-
Fusobacteria	Processing Line t3	Wastewater t3	1	-
Fusobacteria	Soil t1	Soil t1	1	-
Fusobacteria	Soil t1	Soil t2	1	-
Fusobacteria	Soil t1	Wastewater t3	1	-
Fusobacteria	Soil t2	Soil t2	1	-
Fusobacteria	Soil t2	Wastewater t3	1	-
Fusobacteria	Wastewater t3	Wastewater t3	1	-
Gemmatimonadetes	Barn Floor t1	Barn Floor t1	1	-
Gemmatimonadetes	Barn Floor t1	Barn Floor t2	1	-
Gemmatimonadetes	Barn Floor t1	Broiler Feather t1	1	-
Gemmatimonadetes	Barn Floor t1	Broiler Feather t2	1	-
Gemmatimonadetes	Barn Floor t1	Broiler carcass t3	1	-
Gemmatimonadetes	Barn Floor t1	Broiler faeces t1	1	-
Gemmatimonadetes	Barn Floor t1	Broiler faeces t2	1	-
Gemmatimonadetes	Barn Floor t1	Processing Line t3	1	-
Gemmatimonadetes	Barn Floor t1	Soil t1	1	-
Gemmatimonadetes	Barn Floor t1	Soil t2	1	-
Gemmatimonadetes	Barn Floor t1	Wastewater t3	1	-
Gemmatimonadetes	Barn Floor t2	Barn Floor t2	1	-
Gemmatimonadetes	Barn Floor t2	Broiler Feather t1	1	-
Gemmatimonadetes	Barn Floor t2	Broiler Feather t2	1	-
Gemmatimonadetes	Barn Floor t2	Broiler carcass t3	1	-
Gemmatimonadetes	Barn Floor t2	Broiler faeces t1	1	-
Gemmatimonadetes	Barn Floor t2	Broiler faeces t2	1	-
Gemmatimonadetes	Barn Floor t2	Processing Line t3	1	-
Gemmatimonadetes	Barn Floor t2	Soil t1	1	-
Gemmatimonadetes	Barn Floor t2	Soil t2	1	-
Gemmatimonadetes	Barn Floor t2	Wastewater t3	1	-
Gemmatimonadetes	Broiler Feather t1	Broiler Feather t1	1	-
Gemmatimonadetes	Broiler Feather t1	Broiler Feather t2	1	-
Gemmatimonadetes	Broiler Feather t1	Broiler carcass t3	1	-
Gemmatimonadetes	Broiler Feather t1	Broiler faeces t1	1	-
Gemmatimonadetes	Broiler Feather t1	Broiler faeces t2	1	-
Gemmatimonadetes	Broiler Feather t1	Processing Line t3	1	-
Gemmatimonadetes	Broiler Feather t1	Soil t1	1	-
Gemmatimonadetes	Broiler Feather t1	Soil t2	1	-
Gemmatimonadetes	Broiler Feather t1	Wastewater t3	1	-
Gemmatimonadetes	Broiler Feather t2	Broiler Feather t2	1	-
Gemmatimonadetes	Broiler Feather t2	Broiler carcass t3	1	-
Gemmatimonadetes	Broiler Feather t2	Broiler faeces t1	1	-
Gemmatimonadetes	Broiler Feather t2	Broiler faeces t2	1	-
Gemmatimonadetes	Broiler Feather t2	Processing Line t3	1	-
Gemmatimonadetes	Broiler Feather t2	Soil t1	1	-
Gemmatimonadetes	Broiler Feather t2	Soil t2	1	-
Gemmatimonadetes	Broiler Feather t2	Wastewater t3	1	-
Gemmatimonadetes	Broiler carcass t3	Broiler carcass t3	1	-
Gemmatimonadetes	Broiler carcass t3	Broiler faeces t1	1	-
Gemmatimonadetes	Broiler carcass t3	Broiler faeces t2	1	-
Gemmatimonadetes	Broiler carcass t3	Processing Line t3	1	-
Gemmatimonadetes	Broiler carcass t3	Soil t1	1	-
Gemmatimonadetes	Broiler carcass t3	Soil t2	1	-
Gemmatimonadetes	Broiler carcass t3	Wastewater t3	1	-
Gemmatimonadetes	Broiler faeces t1	Broiler faeces t1	1	-
Gemmatimonadetes	Broiler faeces t1	Broiler faeces t2	1	-
Gemmatimonadetes	Broiler faeces t1	Processing Line t3	1	-
Gemmatimonadetes	Broiler faeces t1	Soil t1	1	-
Gemmatimonadetes	Broiler faeces t1	Soil t2	1	-
Gemmatimonadetes	Broiler faeces t1	Wastewater t3	1	-
Gemmatimonadetes	Broiler faeces t2	Broiler faeces t2	1	-
Gemmatimonadetes	Broiler faeces t2	Processing Line t3	1	-
Gemmatimonadetes	Broiler faeces t2	Soil t1	1	-
Gemmatimonadetes	Broiler faeces t2	Soil t2	1	-
Gemmatimonadetes	Broiler faeces t2	Wastewater t3	1	-
Gemmatimonadetes	Processing Line t3	Processing Line t3	1	-
Gemmatimonadetes	Processing Line t3	Soil t1	1	-
Gemmatimonadetes	Processing Line t3	Soil t2	1	-
Gemmatimonadetes	Processing Line t3	Wastewater t3	1	-
Gemmatimonadetes	Soil t1	Soil t1	1	-
Gemmatimonadetes	Soil t1	Soil t2	1	-
Gemmatimonadetes	Soil t1	Wastewater t3	1	-
Gemmatimonadetes	Soil t2	Soil t2	1	-
Gemmatimonadetes	Soil t2	Wastewater t3	1	-
Gemmatimonadetes	Wastewater t3	Wastewater t3	1	-
Lentisphaerae	Barn Floor t1	Barn Floor t1	1	-
Lentisphaerae	Barn Floor t1	Barn Floor t2	1	-
Lentisphaerae	Barn Floor t1	Broiler Feather t1	1	-
Lentisphaerae	Barn Floor t1	Broiler Feather t2	1	-
Lentisphaerae	Barn Floor t1	Broiler carcass t3	1	-
Lentisphaerae	Barn Floor t1	Broiler faeces t1	1	-
Lentisphaerae	Barn Floor t1	Broiler faeces t2	1	-
Lentisphaerae	Barn Floor t1	Processing Line t3	1	-
Lentisphaerae	Barn Floor t1	Soil t1	1	-
Lentisphaerae	Barn Floor t1	Soil t2	1	-
Lentisphaerae	Barn Floor t1	Wastewater t3	1	-
Lentisphaerae	Barn Floor t2	Barn Floor t2	1	-
Lentisphaerae	Barn Floor t2	Broiler Feather t1	1	-
Lentisphaerae	Barn Floor t2	Broiler Feather t2	1	-
Lentisphaerae	Barn Floor t2	Broiler carcass t3	1	-
Lentisphaerae	Barn Floor t2	Broiler faeces t1	1	-
Lentisphaerae	Barn Floor t2	Broiler faeces t2	1	-
Lentisphaerae	Barn Floor t2	Processing Line t3	1	-
Lentisphaerae	Barn Floor t2	Soil t1	1	-
Lentisphaerae	Barn Floor t2	Soil t2	1	-
Lentisphaerae	Barn Floor t2	Wastewater t3	1	-
Lentisphaerae	Broiler Feather t1	Broiler Feather t1	1	-
Lentisphaerae	Broiler Feather t1	Broiler Feather t2	1	-
Lentisphaerae	Broiler Feather t1	Broiler carcass t3	1	-
Lentisphaerae	Broiler Feather t1	Broiler faeces t1	1	-
Lentisphaerae	Broiler Feather t1	Broiler faeces t2	1	-
Lentisphaerae	Broiler Feather t1	Processing Line t3	1	-
Lentisphaerae	Broiler Feather t1	Soil t1	1	-
Lentisphaerae	Broiler Feather t1	Soil t2	1	-
Lentisphaerae	Broiler Feather t1	Wastewater t3	1	-
Lentisphaerae	Broiler Feather t2	Broiler Feather t2	1	-
Lentisphaerae	Broiler Feather t2	Broiler faeces t2	1	-
Lentisphaerae	Broiler Feather t2	Processing Line t3	1	-
Lentisphaerae	Broiler Feather t2	Soil t1	1	-
Lentisphaerae	Broiler Feather t2	Soil t2	1	-
Lentisphaerae	Broiler Feather t2	Wastewater t3	1	-
Lentisphaerae	Broiler carcass t3	Broiler carcass t3	1	-
Lentisphaerae	Broiler carcass t3	Broiler faeces t1	1	-
Lentisphaerae	Broiler carcass t3	Broiler faeces t2	1	-
Lentisphaerae	Broiler carcass t3	Processing Line t3	1	-
Lentisphaerae	Broiler carcass t3	Soil t1	1	-
Lentisphaerae	Broiler carcass t3	Soil t2	1	-
Lentisphaerae	Broiler carcass t3	Wastewater t3	1	-
Lentisphaerae	Broiler faeces t1	Broiler faeces t1	1	-
Lentisphaerae	Broiler faeces t1	Broiler faeces t2	1	-
Lentisphaerae	Broiler faeces t1	Processing Line t3	1	-
Lentisphaerae	Broiler faeces t1	Soil t1	1	-
Lentisphaerae	Broiler faeces t1	Soil t2	1	-
Lentisphaerae	Broiler faeces t1	Wastewater t3	1	-
Lentisphaerae	Broiler faeces t2	Broiler faeces t2	1	-
Lentisphaerae	Broiler faeces t2	Processing Line t3	1	-
Lentisphaerae	Broiler faeces t2	Soil t1	1	-
Lentisphaerae	Broiler faeces t2	Soil t2	1	-
Lentisphaerae	Broiler faeces t2	Wastewater t3	1	-
Lentisphaerae	Processing Line t3	Processing Line t3	1	-
Lentisphaerae	Processing Line t3	Soil t1	1	-
Lentisphaerae	Processing Line t3	Soil t2	1	-
Lentisphaerae	Processing Line t3	Wastewater t3	1	-
Lentisphaerae	Soil t1	Soil t1	1	-
Lentisphaerae	Soil t1	Soil t2	1	-
Lentisphaerae	Soil t1	Wastewater t3	1	-
Lentisphaerae	Soil t2	Soil t2	1	-
Lentisphaerae	Soil t2	Wastewater t3	1	-
Lentisphaerae	Wastewater t3	Wastewater t3	1	-
Nitrospirae	Barn Floor t1	Barn Floor t1	1	-
Nitrospirae	Barn Floor t1	Barn Floor t2	1	-
Nitrospirae	Barn Floor t1	Broiler Feather t1	1	-
Nitrospirae	Barn Floor t1	Broiler Feather t2	1	-
Nitrospirae	Barn Floor t1	Broiler carcass t3	1	-
Nitrospirae	Barn Floor t1	Broiler faeces t1	1	-
Nitrospirae	Barn Floor t1	Broiler faeces t2	1	-
Nitrospirae	Barn Floor t1	Processing Line t3	1	-
Nitrospirae	Barn Floor t1	Soil t1	1	-
Nitrospirae	Barn Floor t1	Soil t2	1	-
Nitrospirae	Barn Floor t1	Wastewater t3	1	-
Nitrospirae	Barn Floor t2	Barn Floor t2	1	-
Nitrospirae	Barn Floor t2	Broiler Feather t1	1	-
Nitrospirae	Barn Floor t2	Broiler Feather t2	1	-
Nitrospirae	Barn Floor t2	Broiler carcass t3	1	-
Nitrospirae	Barn Floor t2	Broiler faeces t1	1	-
Nitrospirae	Barn Floor t2	Broiler faeces t2	1	-
Nitrospirae	Barn Floor t2	Processing Line t3	1	-
Nitrospirae	Barn Floor t2	Soil t1	1	-
Nitrospirae	Barn Floor t2	Soil t2	1	-
Nitrospirae	Barn Floor t2	Wastewater t3	1	-
Nitrospirae	Broiler Feather t1	Broiler Feather t1	1	-
Nitrospirae	Broiler Feather t1	Broiler Feather t2	1	-
Nitrospirae	Broiler Feather t1	Broiler carcass t3	1	-
Nitrospirae	Broiler Feather t1	Broiler faeces t1	1	-
Nitrospirae	Broiler Feather t1	Broiler faeces t2	1	-
Nitrospirae	Broiler Feather t1	Processing Line t3	1	-
Nitrospirae	Broiler Feather t1	Soil t1	1	-
Nitrospirae	Broiler Feather t1	Soil t2	1	-
Nitrospirae	Broiler Feather t1	Wastewater t3	1	-
Nitrospirae	Broiler Feather t2	Broiler Feather t2	1	-
Nitrospirae	Broiler Feather t2	Broiler carcass t3	1	-
Nitrospirae	Broiler Feather t2	Broiler faeces t1	1	-
Nitrospirae	Broiler Feather t2	Broiler faeces t2	1	-
Nitrospirae	Broiler Feather t2	Processing Line t3	1	-
Nitrospirae	Broiler Feather t2	Soil t1	1	-
Nitrospirae	Broiler Feather t2	Soil t2	1	-
Nitrospirae	Broiler Feather t2	Wastewater t3	1	-
Nitrospirae	Broiler carcass t3	Broiler carcass t3	1	-
Nitrospirae	Broiler carcass t3	Broiler faeces t1	1	-
Nitrospirae	Broiler carcass t3	Broiler faeces t2	1	-
Nitrospirae	Broiler carcass t3	Processing Line t3	1	-
Nitrospirae	Broiler carcass t3	Soil t1	1	-
Nitrospirae	Broiler carcass t3	Soil t2	1	-
Nitrospirae	Broiler carcass t3	Wastewater t3	1	-
Nitrospirae	Broiler faeces t1	Broiler faeces t1	1	-
Nitrospirae	Broiler faeces t1	Broiler faeces t2	1	-
Nitrospirae	Broiler faeces t1	Processing Line t3	1	-
Nitrospirae	Broiler faeces t1	Soil t1	1	-
Nitrospirae	Broiler faeces t1	Soil t2	1	-
Nitrospirae	Broiler faeces t1	Wastewater t3	1	-
Nitrospirae	Broiler faeces t2	Broiler faeces t2	1	-
Nitrospirae	Broiler faeces t2	Processing Line t3	1	-
Nitrospirae	Broiler faeces t2	Soil t1	1	-
Nitrospirae	Broiler faeces t2	Soil t2	1	-
Nitrospirae	Broiler faeces t2	Wastewater t3	1	-
Nitrospirae	Processing Line t3	Processing Line t3	1	-
Nitrospirae	Processing Line t3	Soil t1	1	-
Nitrospirae	Processing Line t3	Soil t2	1	-
Nitrospirae	Processing Line t3	Wastewater t3	1	-
Nitrospirae	Soil t1	Soil t1	1	-
Nitrospirae	Soil t1	Soil t2	1	-
Nitrospirae	Soil t1	Wastewater t3	1	-
Nitrospirae	Soil t2	Soil t2	1	-
Nitrospirae	Soil t2	Wastewater t3	1	-
Nitrospirae	Wastewater t3	Wastewater t3	1	-
Planctomycetes	Barn Floor t1	Barn Floor t1	1	-
Planctomycetes	Barn Floor t1	Barn Floor t2	1	-
Planctomycetes	Barn Floor t1	Broiler Feather t1	1	-
Planctomycetes	Barn Floor t1	Broiler Feather t2	1	-
Planctomycetes	Barn Floor t1	Broiler carcass t3	1	-
Planctomycetes	Barn Floor t1	Broiler faeces t1	1	-
Planctomycetes	Barn Floor t1	Broiler faeces t2	1	-
Planctomycetes	Barn Floor t1	Processing Line t3	1	-
Planctomycetes	Barn Floor t1	Wastewater t3	1	-
Planctomycetes	Barn Floor t2	Barn Floor t2	1	-
Planctomycetes	Barn Floor t2	Broiler Feather t1	1	-
Planctomycetes	Barn Floor t2	Broiler Feather t2	1	-
Planctomycetes	Barn Floor t2	Broiler carcass t3	1	-
Planctomycetes	Barn Floor t2	Broiler faeces t1	1	-
Planctomycetes	Barn Floor t2	Broiler faeces t2	1	-
Planctomycetes	Barn Floor t2	Processing Line t3	1	-
Planctomycetes	Barn Floor t2	Wastewater t3	1	-
Planctomycetes	Broiler Feather t1	Broiler Feather t1	1	-
Planctomycetes	Broiler Feather t1	Broiler Feather t2	1	-
Planctomycetes	Broiler Feather t1	Broiler carcass t3	1	-
Planctomycetes	Broiler Feather t1	Broiler faeces t1	1	-
Planctomycetes	Broiler Feather t1	Broiler faeces t2	1	-
Planctomycetes	Broiler Feather t1	Processing Line t3	1	-
Planctomycetes	Broiler Feather t1	Wastewater t3	1	-
Planctomycetes	Broiler Feather t2	Broiler Feather t2	1	-
Planctomycetes	Broiler Feather t2	Broiler carcass t3	1	-
Planctomycetes	Broiler Feather t2	Broiler faeces t1	1	-
Planctomycetes	Broiler Feather t2	Broiler faeces t2	1	-
Planctomycetes	Broiler Feather t2	Processing Line t3	1	-
Planctomycetes	Broiler Feather t2	Wastewater t3	1	-
Planctomycetes	Broiler carcass t3	Broiler carcass t3	1	-
Planctomycetes	Broiler carcass t3	Broiler faeces t1	1	-
Planctomycetes	Broiler carcass t3	Broiler faeces t2	1	-
Planctomycetes	Broiler carcass t3	Processing Line t3	1	-
Planctomycetes	Broiler carcass t3	Wastewater t3	1	-
Planctomycetes	Broiler faeces t1	Broiler faeces t1	1	-
Planctomycetes	Broiler faeces t1	Broiler faeces t2	1	-
Planctomycetes	Broiler faeces t1	Processing Line t3	1	-
Planctomycetes	Broiler faeces t1	Wastewater t3	1	-
Planctomycetes	Broiler faeces t2	Broiler faeces t2	1	-
Planctomycetes	Broiler faeces t2	Processing Line t3	1	-
Planctomycetes	Broiler faeces t2	Wastewater t3	1	-
Planctomycetes	Processing Line t3	Processing Line t3	1	-
Planctomycetes	Processing Line t3	Wastewater t3	1	-
Planctomycetes	Soil t1	Soil t1	1	-
Planctomycetes	Soil t1	Soil t2	1	-
Planctomycetes	Soil t2	Soil t2	1	-
Planctomycetes	Wastewater t3	Wastewater t3	1	-
Proteobacteria	Barn Floor t1	Barn Floor t1	1	-
Proteobacteria	Barn Floor t1	Barn Floor t2	1	-
Proteobacteria	Barn Floor t1	Broiler Feather t1	1	-
Proteobacteria	Barn Floor t1	Broiler Feather t2	1	-
Proteobacteria	Barn Floor t1	Broiler carcass t3	1	-
Proteobacteria	Barn Floor t1	Broiler faeces t1	1	-
Proteobacteria	Barn Floor t1	Broiler faeces t2	1	-
Proteobacteria	Barn Floor t1	Processing Line t3	1	-
Proteobacteria	Barn Floor t1	Soil t1	1	-
Proteobacteria	Barn Floor t1	Soil t2	1	-
Proteobacteria	Barn Floor t1	Wastewater t3	1	-
Proteobacteria	Barn Floor t2	Barn Floor t2	1	-
Proteobacteria	Barn Floor t2	Broiler Feather t1	1	-
Proteobacteria	Barn Floor t2	Broiler Feather t2	1	-
Proteobacteria	Barn Floor t2	Broiler faeces t1	1	-
Proteobacteria	Barn Floor t2	Broiler faeces t2	1	-
Proteobacteria	Barn Floor t2	Processing Line t3	1	-
Proteobacteria	Broiler Feather t1	Broiler Feather t1	1	-
Proteobacteria	Broiler Feather t1	Broiler Feather t2	1	-
Proteobacteria	Broiler Feather t1	Broiler faeces t1	1	-
Proteobacteria	Broiler Feather t1	Broiler faeces t2	1	-
Proteobacteria	Broiler Feather t1	Processing Line t3	1	-
Proteobacteria	Broiler Feather t2	Broiler Feather t2	1	-
Proteobacteria	Broiler Feather t2	Broiler faeces t1	1	-
Proteobacteria	Broiler Feather t2	Broiler faeces t2	1	-
Proteobacteria	Broiler Feather t2	Processing Line t3	1	-
Proteobacteria	Broiler carcass t3	Broiler carcass t3	1	-
Proteobacteria	Broiler carcass t3	Processing Line t3	1	-
Proteobacteria	Broiler carcass t3	Soil t1	1	-
Proteobacteria	Broiler carcass t3	Soil t2	1	-
Proteobacteria	Broiler carcass t3	Wastewater t3	1	-
Proteobacteria	Broiler faeces t1	Broiler faeces t1	1	-
Proteobacteria	Broiler faeces t1	Broiler faeces t2	1	-
Proteobacteria	Broiler faeces t1	Processing Line t3	1	-
Proteobacteria	Broiler faeces t2	Broiler faeces t2	1	-
Proteobacteria	Broiler faeces t2	Processing Line t3	1	-
Proteobacteria	Processing Line t3	Processing Line t3	1	-
Proteobacteria	Processing Line t3	Soil t1	1	-
Proteobacteria	Processing Line t3	Soil t2	1	-
Proteobacteria	Processing Line t3	Wastewater t3	1	-
Proteobacteria	Soil t1	Soil t1	1	-
Proteobacteria	Soil t1	Soil t2	1	-
Proteobacteria	Soil t1	Wastewater t3	1	-
Proteobacteria	Soil t2	Soil t2	1	-
Proteobacteria	Soil t2	Wastewater t3	1	-
Proteobacteria	Wastewater t3	Wastewater t3	1	-
Synergistetes	Barn Floor t1	Barn Floor t1	1	-
Synergistetes	Barn Floor t1	Barn Floor t2	1	-
Synergistetes	Barn Floor t1	Broiler Feather t1	1	-
Synergistetes	Barn Floor t1	Broiler Feather t2	1	-
Synergistetes	Barn Floor t1	Broiler carcass t3	1	-
Synergistetes	Barn Floor t1	Broiler faeces t1	1	-
Synergistetes	Barn Floor t1	Broiler faeces t2	1	-
Synergistetes	Barn Floor t1	Processing Line t3	1	-
Synergistetes	Barn Floor t1	Soil t1	1	-
Synergistetes	Barn Floor t1	Soil t2	1	-
Synergistetes	Barn Floor t1	Wastewater t3	1	-
Synergistetes	Barn Floor t2	Barn Floor t2	1	-
Synergistetes	Barn Floor t2	Broiler Feather t1	1	-
Synergistetes	Barn Floor t2	Broiler Feather t2	1	-
Synergistetes	Barn Floor t2	Broiler carcass t3	1	-
Synergistetes	Barn Floor t2	Broiler faeces t1	1	-
Synergistetes	Barn Floor t2	Broiler faeces t2	1	-
Synergistetes	Barn Floor t2	Processing Line t3	1	-
Synergistetes	Barn Floor t2	Soil t1	1	-
Synergistetes	Barn Floor t2	Soil t2	1	-
Synergistetes	Barn Floor t2	Wastewater t3	1	-
Synergistetes	Broiler Feather t1	Broiler Feather t1	1	-
Synergistetes	Broiler Feather t1	Broiler Feather t2	1	-
Synergistetes	Broiler Feather t1	Broiler carcass t3	1	-
Synergistetes	Broiler Feather t1	Broiler faeces t1	1	-
Synergistetes	Broiler Feather t1	Broiler faeces t2	1	-
Synergistetes	Broiler Feather t1	Processing Line t3	1	-
Synergistetes	Broiler Feather t1	Soil t1	1	-
Synergistetes	Broiler Feather t1	Soil t2	1	-
Synergistetes	Broiler Feather t1	Wastewater t3	1	-
Synergistetes	Broiler Feather t2	Broiler Feather t2	1	-
Synergistetes	Broiler Feather t2	Broiler carcass t3	1	-
Synergistetes	Broiler Feather t2	Broiler faeces t1	1	-
Synergistetes	Broiler Feather t2	Broiler faeces t2	1	-
Synergistetes	Broiler Feather t2	Processing Line t3	1	-
Synergistetes	Broiler Feather t2	Soil t1	1	-
Synergistetes	Broiler Feather t2	Soil t2	1	-
Synergistetes	Broiler Feather t2	Wastewater t3	1	-
Synergistetes	Broiler carcass t3	Broiler carcass t3	1	-
Synergistetes	Broiler carcass t3	Broiler faeces t1	1	-
Synergistetes	Broiler carcass t3	Broiler faeces t2	1	-
Synergistetes	Broiler carcass t3	Processing Line t3	1	-
Synergistetes	Broiler carcass t3	Soil t1	1	-
Synergistetes	Broiler carcass t3	Soil t2	1	-
Synergistetes	Broiler carcass t3	Wastewater t3	1	-
Synergistetes	Broiler faeces t1	Broiler faeces t1	1	-
Synergistetes	Broiler faeces t1	Broiler faeces t2	1	-
Synergistetes	Broiler faeces t1	Processing Line t3	1	-
Synergistetes	Broiler faeces t1	Soil t1	1	-
Synergistetes	Broiler faeces t1	Soil t2	1	-
Synergistetes	Broiler faeces t1	Wastewater t3	1	-
Synergistetes	Broiler faeces t2	Broiler faeces t2	1	-
Synergistetes	Broiler faeces t2	Processing Line t3	1	-
Synergistetes	Broiler faeces t2	Soil t1	1	-
Synergistetes	Broiler faeces t2	Soil t2	1	-
Synergistetes	Broiler faeces t2	Wastewater t3	1	-
Synergistetes	Processing Line t3	Processing Line t3	1	-
Synergistetes	Processing Line t3	Soil t1	1	-
Synergistetes	Processing Line t3	Soil t2	1	-
Synergistetes	Processing Line t3	Wastewater t3	1	-
Synergistetes	Soil t1	Soil t1	1	-
Synergistetes	Soil t1	Soil t2	1	-
Synergistetes	Soil t1	Wastewater t3	1	-
Synergistetes	Soil t2	Soil t2	1	-
Synergistetes	Soil t2	Wastewater t3	1	-
Synergistetes	Wastewater t3	Wastewater t3	1	-
Tenericutes	Barn Floor t1	Barn Floor t1	1	-
Tenericutes	Barn Floor t1	Barn Floor t2	1	-
Tenericutes	Barn Floor t1	Broiler Feather t1	1	-
Tenericutes	Barn Floor t1	Broiler Feather t2	1	-
Tenericutes	Barn Floor t1	Broiler carcass t3	1	-
Tenericutes	Barn Floor t1	Broiler faeces t1	1	-
Tenericutes	Barn Floor t1	Broiler faeces t2	1	-
Tenericutes	Barn Floor t1	Processing Line t3	1	-
Tenericutes	Barn Floor t1	Soil t1	1	-
Tenericutes	Barn Floor t1	Soil t2	1	-
Tenericutes	Barn Floor t1	Wastewater t3	1	-
Tenericutes	Barn Floor t2	Barn Floor t2	1	-
Tenericutes	Barn Floor t2	Broiler Feather t1	1	-
Tenericutes	Barn Floor t2	Broiler Feather t2	1	-
Tenericutes	Barn Floor t2	Broiler carcass t3	1	-
Tenericutes	Barn Floor t2	Broiler faeces t1	1	-
Tenericutes	Barn Floor t2	Broiler faeces t2	1	-
Tenericutes	Barn Floor t2	Processing Line t3	1	-
Tenericutes	Barn Floor t2	Soil t1	1	-
Tenericutes	Barn Floor t2	Soil t2	1	-
Tenericutes	Barn Floor t2	Wastewater t3	1	-
Tenericutes	Broiler Feather t1	Broiler Feather t1	1	-
Tenericutes	Broiler Feather t1	Broiler Feather t2	1	-
Tenericutes	Broiler Feather t1	Broiler carcass t3	1	-
Tenericutes	Broiler Feather t1	Broiler faeces t1	1	-
Tenericutes	Broiler Feather t1	Broiler faeces t2	1	-
Tenericutes	Broiler Feather t1	Processing Line t3	1	-
Tenericutes	Broiler Feather t1	Soil t1	1	-
Tenericutes	Broiler Feather t1	Soil t2	1	-
Tenericutes	Broiler Feather t1	Wastewater t3	1	-
Tenericutes	Broiler Feather t2	Broiler Feather t2	1	-
Tenericutes	Broiler Feather t2	Broiler carcass t3	1	-
Tenericutes	Broiler Feather t2	Broiler faeces t1	1	-
Tenericutes	Broiler Feather t2	Broiler faeces t2	1	-
Tenericutes	Broiler Feather t2	Processing Line t3	1	-
Tenericutes	Broiler Feather t2	Soil t1	1	-
Tenericutes	Broiler Feather t2	Soil t2	1	-
Tenericutes	Broiler Feather t2	Wastewater t3	1	-
Tenericutes	Broiler carcass t3	Broiler carcass t3	1	-
Tenericutes	Broiler carcass t3	Broiler faeces t1	1	-
Tenericutes	Broiler carcass t3	Broiler faeces t2	1	-
Tenericutes	Broiler carcass t3	Processing Line t3	1	-
Tenericutes	Broiler carcass t3	Soil t1	1	-
Tenericutes	Broiler carcass t3	Soil t2	1	-
Tenericutes	Broiler carcass t3	Wastewater t3	1	-
Tenericutes	Broiler faeces t1	Broiler faeces t1	1	-
Tenericutes	Broiler faeces t1	Broiler faeces t2	1	-
Tenericutes	Broiler faeces t1	Processing Line t3	1	-
Tenericutes	Broiler faeces t1	Soil t1	1	-
Tenericutes	Broiler faeces t1	Soil t2	1	-
Tenericutes	Broiler faeces t2	Broiler faeces t2	1	-
Tenericutes	Broiler faeces t2	Processing Line t3	1	-
Tenericutes	Broiler faeces t2	Soil t1	1	-
Tenericutes	Broiler faeces t2	Soil t2	1	-
Tenericutes	Processing Line t3	Processing Line t3	1	-
Tenericutes	Processing Line t3	Soil t1	1	-
Tenericutes	Processing Line t3	Soil t2	1	-
Tenericutes	Processing Line t3	Wastewater t3	1	-
Tenericutes	Soil t1	Soil t1	1	-
Tenericutes	Soil t1	Soil t2	1	-
Tenericutes	Soil t1	Wastewater t3	1	-
Tenericutes	Soil t2	Soil t2	1	-
Tenericutes	Soil t2	Wastewater t3	1	-
Tenericutes	Wastewater t3	Wastewater t3	1	-
Thermotogae	Barn Floor t1	Barn Floor t1	1	-
Thermotogae	Barn Floor t1	Barn Floor t2	1	-
Thermotogae	Barn Floor t1	Broiler Feather t1	1	-
Thermotogae	Barn Floor t1	Broiler Feather t2	1	-
Thermotogae	Barn Floor t1	Broiler carcass t3	1	-
Thermotogae	Barn Floor t1	Broiler faeces t1	1	-
Thermotogae	Barn Floor t1	Broiler faeces t2	1	-
Thermotogae	Barn Floor t1	Processing Line t3	1	-
Thermotogae	Barn Floor t1	Soil t1	1	-
Thermotogae	Barn Floor t1	Soil t2	1	-
Thermotogae	Barn Floor t1	Wastewater t3	1	-
Thermotogae	Barn Floor t2	Barn Floor t2	1	-
Thermotogae	Barn Floor t2	Broiler Feather t1	1	-
Thermotogae	Barn Floor t2	Broiler Feather t2	1	-
Thermotogae	Barn Floor t2	Broiler carcass t3	1	-
Thermotogae	Barn Floor t2	Broiler faeces t1	1	-
Thermotogae	Barn Floor t2	Broiler faeces t2	1	-
Thermotogae	Barn Floor t2	Processing Line t3	1	-
Thermotogae	Barn Floor t2	Soil t1	1	-
Thermotogae	Barn Floor t2	Soil t2	1	-
Thermotogae	Barn Floor t2	Wastewater t3	1	-
Thermotogae	Broiler Feather t1	Broiler Feather t1	1	-
Thermotogae	Broiler Feather t1	Broiler Feather t2	1	-
Thermotogae	Broiler Feather t1	Broiler carcass t3	1	-
Thermotogae	Broiler Feather t1	Broiler faeces t1	1	-
Thermotogae	Broiler Feather t1	Broiler faeces t2	1	-
Thermotogae	Broiler Feather t1	Processing Line t3	1	-
Thermotogae	Broiler Feather t1	Soil t1	1	-
Thermotogae	Broiler Feather t1	Soil t2	1	-
Thermotogae	Broiler Feather t1	Wastewater t3	1	-
Thermotogae	Broiler Feather t2	Broiler Feather t2	1	-
Thermotogae	Broiler Feather t2	Broiler carcass t3	1	-
Thermotogae	Broiler Feather t2	Broiler faeces t1	1	-
Thermotogae	Broiler Feather t2	Broiler faeces t2	1	-
Thermotogae	Broiler Feather t2	Processing Line t3	1	-
Thermotogae	Broiler Feather t2	Soil t1	1	-
Thermotogae	Broiler Feather t2	Soil t2	1	-
Thermotogae	Broiler Feather t2	Wastewater t3	1	-
Thermotogae	Broiler carcass t3	Broiler carcass t3	1	-
Thermotogae	Broiler carcass t3	Broiler faeces t1	1	-
Thermotogae	Broiler carcass t3	Broiler faeces t2	1	-
Thermotogae	Broiler carcass t3	Processing Line t3	1	-
Thermotogae	Broiler carcass t3	Soil t1	1	-
Thermotogae	Broiler carcass t3	Soil t2	1	-
Thermotogae	Broiler carcass t3	Wastewater t3	1	-
Thermotogae	Broiler faeces t1	Broiler faeces t1	1	-
Thermotogae	Broiler faeces t1	Broiler faeces t2	1	-
Thermotogae	Broiler faeces t1	Processing Line t3	1	-
Thermotogae	Broiler faeces t1	Soil t1	1	-
Thermotogae	Broiler faeces t1	Soil t2	1	-
Thermotogae	Broiler faeces t1	Wastewater t3	1	-
Thermotogae	Broiler faeces t2	Broiler faeces t2	1	-
Thermotogae	Broiler faeces t2	Processing Line t3	1	-
Thermotogae	Broiler faeces t2	Soil t1	1	-
Thermotogae	Broiler faeces t2	Soil t2	1	-
Thermotogae	Broiler faeces t2	Wastewater t3	1	-
Thermotogae	Processing Line t3	Processing Line t3	1	-
Thermotogae	Processing Line t3	Soil t1	1	-
Thermotogae	Processing Line t3	Soil t2	1	-
Thermotogae	Processing Line t3	Wastewater t3	1	-
Thermotogae	Soil t1	Soil t1	1	-
Thermotogae	Soil t1	Soil t2	1	-
Thermotogae	Soil t1	Wastewater t3	1	-
Thermotogae	Soil t2	Soil t2	1	-
Thermotogae	Soil t2	Wastewater t3	1	-
Thermotogae	Wastewater t3	Wastewater t3	1	-
Verrucomicrobia	Barn Floor t1	Barn Floor t1	1	-
Verrucomicrobia	Barn Floor t1	Barn Floor t2	1	-
Verrucomicrobia	Barn Floor t1	Broiler Feather t1	1	-
Verrucomicrobia	Barn Floor t1	Broiler carcass t3	1	-
Verrucomicrobia	Barn Floor t1	Broiler faeces t1	1	-
Verrucomicrobia	Barn Floor t1	Broiler faeces t2	1	-
Verrucomicrobia	Barn Floor t1	Processing Line t3	1	-
Verrucomicrobia	Barn Floor t1	Soil t1	1	-
Verrucomicrobia	Barn Floor t1	Soil t2	1	-
Verrucomicrobia	Barn Floor t1	Wastewater t3	1	-
Verrucomicrobia	Barn Floor t2	Barn Floor t2	1	-
Verrucomicrobia	Barn Floor t2	Broiler Feather t1	1	-
Verrucomicrobia	Barn Floor t2	Broiler Feather t2	1	-
Verrucomicrobia	Barn Floor t2	Broiler carcass t3	1	-
Verrucomicrobia	Barn Floor t2	Broiler faeces t1	1	-
Verrucomicrobia	Barn Floor t2	Broiler faeces t2	1	-
Verrucomicrobia	Barn Floor t2	Processing Line t3	1	-
Verrucomicrobia	Barn Floor t2	Soil t1	1	-
Verrucomicrobia	Barn Floor t2	Soil t2	1	-
Verrucomicrobia	Barn Floor t2	Wastewater t3	1	-
Verrucomicrobia	Broiler Feather t1	Broiler Feather t1	1	-
Verrucomicrobia	Broiler Feather t1	Broiler Feather t2	1	-
Verrucomicrobia	Broiler Feather t1	Broiler carcass t3	1	-
Verrucomicrobia	Broiler Feather t1	Broiler faeces t1	1	-
Verrucomicrobia	Broiler Feather t1	Broiler faeces t2	1	-
Verrucomicrobia	Broiler Feather t1	Processing Line t3	1	-
Verrucomicrobia	Broiler Feather t1	Soil t1	1	-
Verrucomicrobia	Broiler Feather t1	Soil t2	1	-
Verrucomicrobia	Broiler Feather t1	Wastewater t3	1	-
Verrucomicrobia	Broiler Feather t2	Broiler Feather t2	1	-
Verrucomicrobia	Broiler carcass t3	Broiler carcass t3	1	-
Verrucomicrobia	Broiler carcass t3	Broiler faeces t1	1	-
Verrucomicrobia	Broiler carcass t3	Broiler faeces t2	1	-
Verrucomicrobia	Broiler carcass t3	Processing Line t3	1	-
Verrucomicrobia	Broiler carcass t3	Soil t1	1	-
Verrucomicrobia	Broiler carcass t3	Soil t2	1	-
Verrucomicrobia	Broiler carcass t3	Wastewater t3	1	-
Verrucomicrobia	Broiler faeces t1	Broiler faeces t1	1	-
Verrucomicrobia	Broiler faeces t1	Processing Line t3	1	-
Verrucomicrobia	Broiler faeces t1	Soil t1	1	-
Verrucomicrobia	Broiler faeces t1	Soil t2	1	-
Verrucomicrobia	Broiler faeces t1	Wastewater t3	1	-
Verrucomicrobia	Broiler faeces t2	Broiler faeces t2	1	-
Verrucomicrobia	Broiler faeces t2	Processing Line t3	1	-
Verrucomicrobia	Broiler faeces t2	Soil t1	1	-
Verrucomicrobia	Broiler faeces t2	Soil t2	1	-
Verrucomicrobia	Broiler faeces t2	Wastewater t3	1	-
Verrucomicrobia	Processing Line t3	Processing Line t3	1	-
Verrucomicrobia	Processing Line t3	Soil t1	1	-
Verrucomicrobia	Processing Line t3	Soil t2	1	-
Verrucomicrobia	Processing Line t3	Wastewater t3	1	-
Verrucomicrobia	Soil t1	Soil t1	1	-
Verrucomicrobia	Soil t1	Soil t2	1	-
Verrucomicrobia	Soil t1	Wastewater t3	1	-
Verrucomicrobia	Soil t2	Soil t2	1	-
Verrucomicrobia	Soil t2	Wastewater t3	1	-
Verrucomicrobia	Wastewater t3	Wastewater t3	1	-
candidate_division_NC10	Barn Floor t1	Barn Floor t1	1	-
candidate_division_NC10	Barn Floor t1	Barn Floor t2	1	-
candidate_division_NC10	Barn Floor t1	Broiler Feather t1	1	-
candidate_division_NC10	Barn Floor t1	Broiler Feather t2	1	-
candidate_division_NC10	Barn Floor t1	Broiler carcass t3	1	-
candidate_division_NC10	Barn Floor t1	Broiler faeces t1	1	-
candidate_division_NC10	Barn Floor t1	Broiler faeces t2	1	-
candidate_division_NC10	Barn Floor t1	Processing Line t3	1	-
candidate_division_NC10	Barn Floor t1	Soil t1	1	-
candidate_division_NC10	Barn Floor t1	Soil t2	1	-
candidate_division_NC10	Barn Floor t1	Wastewater t3	1	-
candidate_division_NC10	Barn Floor t2	Barn Floor t2	1	-
candidate_division_NC10	Barn Floor t2	Broiler Feather t1	1	-
candidate_division_NC10	Barn Floor t2	Broiler Feather t2	1	-
candidate_division_NC10	Barn Floor t2	Broiler carcass t3	1	-
candidate_division_NC10	Barn Floor t2	Broiler faeces t1	1	-
candidate_division_NC10	Barn Floor t2	Broiler faeces t2	1	-
candidate_division_NC10	Barn Floor t2	Processing Line t3	1	-
candidate_division_NC10	Barn Floor t2	Soil t1	1	-
candidate_division_NC10	Barn Floor t2	Soil t2	1	-
candidate_division_NC10	Barn Floor t2	Wastewater t3	1	-
candidate_division_NC10	Broiler Feather t1	Broiler Feather t1	1	-
candidate_division_NC10	Broiler Feather t1	Broiler Feather t2	1	-
candidate_division_NC10	Broiler Feather t1	Broiler carcass t3	1	-
candidate_division_NC10	Broiler Feather t1	Broiler faeces t1	1	-
candidate_division_NC10	Broiler Feather t1	Broiler faeces t2	1	-
candidate_division_NC10	Broiler Feather t1	Processing Line t3	1	-
candidate_division_NC10	Broiler Feather t1	Soil t1	1	-
candidate_division_NC10	Broiler Feather t1	Soil t2	1	-
candidate_division_NC10	Broiler Feather t1	Wastewater t3	1	-
candidate_division_NC10	Broiler Feather t2	Broiler Feather t2	1	-
candidate_division_NC10	Broiler Feather t2	Broiler carcass t3	1	-
candidate_division_NC10	Broiler Feather t2	Broiler faeces t1	1	-
candidate_division_NC10	Broiler Feather t2	Broiler faeces t2	1	-
candidate_division_NC10	Broiler Feather t2	Processing Line t3	1	-
candidate_division_NC10	Broiler Feather t2	Soil t1	1	-
candidate_division_NC10	Broiler Feather t2	Soil t2	1	-
candidate_division_NC10	Broiler Feather t2	Wastewater t3	1	-
candidate_division_NC10	Broiler carcass t3	Broiler carcass t3	1	-
candidate_division_NC10	Broiler carcass t3	Broiler faeces t1	1	-
candidate_division_NC10	Broiler carcass t3	Broiler faeces t2	1	-
candidate_division_NC10	Broiler carcass t3	Processing Line t3	1	-
candidate_division_NC10	Broiler carcass t3	Soil t1	1	-
candidate_division_NC10	Broiler carcass t3	Soil t2	1	-
candidate_division_NC10	Broiler carcass t3	Wastewater t3	1	-
candidate_division_NC10	Broiler faeces t1	Broiler faeces t1	1	-
candidate_division_NC10	Broiler faeces t1	Broiler faeces t2	1	-
candidate_division_NC10	Broiler faeces t1	Processing Line t3	1	-
candidate_division_NC10	Broiler faeces t1	Soil t1	1	-
candidate_division_NC10	Broiler faeces t1	Soil t2	1	-
candidate_division_NC10	Broiler faeces t1	Wastewater t3	1	-
candidate_division_NC10	Broiler faeces t2	Broiler faeces t2	1	-
candidate_division_NC10	Broiler faeces t2	Processing Line t3	1	-
candidate_division_NC10	Broiler faeces t2	Soil t1	1	-
candidate_division_NC10	Broiler faeces t2	Soil t2	1	-
candidate_division_NC10	Broiler faeces t2	Wastewater t3	1	-
candidate_division_NC10	Processing Line t3	Processing Line t3	1	-
candidate_division_NC10	Processing Line t3	Soil t1	1	-
candidate_division_NC10	Processing Line t3	Soil t2	1	-
candidate_division_NC10	Processing Line t3	Wastewater t3	1	-
candidate_division_NC10	Soil t1	Soil t1	1	-
candidate_division_NC10	Soil t1	Soil t2	1	-
candidate_division_NC10	Soil t1	Wastewater t3	1	-
candidate_division_NC10	Soil t2	Soil t2	1	-
candidate_division_NC10	Soil t2	Wastewater t3	1	-
candidate_division_NC10	Wastewater t3	Wastewater t3	1	-
Apicomplexa	Barn Floor t1	Barn Floor t1	1	-
Apicomplexa	Barn Floor t1	Barn Floor t2	1	-
Apicomplexa	Barn Floor t1	Broiler Feather t1	1	-
Apicomplexa	Barn Floor t1	Broiler Feather t2	1	-
Apicomplexa	Barn Floor t1	Broiler carcass t3	1	-
Apicomplexa	Barn Floor t1	Broiler faeces t1	1	-
Apicomplexa	Barn Floor t1	Broiler faeces t2	1	-
Apicomplexa	Barn Floor t1	Processing Line t3	1	-
Apicomplexa	Barn Floor t1	Soil t1	1	-
Apicomplexa	Barn Floor t1	Soil t2	1	-
Apicomplexa	Barn Floor t1	Wastewater t3	1	-
Apicomplexa	Barn Floor t2	Barn Floor t2	1	-
Apicomplexa	Barn Floor t2	Broiler Feather t1	1	-
Apicomplexa	Barn Floor t2	Broiler Feather t2	1	-
Apicomplexa	Barn Floor t2	Broiler carcass t3	1	-
Apicomplexa	Barn Floor t2	Broiler faeces t1	1	-
Apicomplexa	Barn Floor t2	Broiler faeces t2	1	-
Apicomplexa	Barn Floor t2	Processing Line t3	1	-
Apicomplexa	Barn Floor t2	Soil t1	1	-
Apicomplexa	Barn Floor t2	Soil t2	1	-
Apicomplexa	Barn Floor t2	Wastewater t3	1	-
Apicomplexa	Broiler Feather t1	Broiler Feather t1	1	-
Apicomplexa	Broiler Feather t1	Broiler Feather t2	1	-
Apicomplexa	Broiler Feather t1	Broiler carcass t3	1	-
Apicomplexa	Broiler Feather t1	Broiler faeces t1	1	-
Apicomplexa	Broiler Feather t1	Broiler faeces t2	1	-
Apicomplexa	Broiler Feather t1	Processing Line t3	1	-
Apicomplexa	Broiler Feather t1	Soil t1	1	-
Apicomplexa	Broiler Feather t1	Soil t2	1	-
Apicomplexa	Broiler Feather t1	Wastewater t3	1	-
Apicomplexa	Broiler Feather t2	Broiler Feather t2	1	-
Apicomplexa	Broiler Feather t2	Broiler carcass t3	1	-
Apicomplexa	Broiler Feather t2	Broiler faeces t1	1	-
Apicomplexa	Broiler Feather t2	Broiler faeces t2	1	-
Apicomplexa	Broiler Feather t2	Processing Line t3	1	-
Apicomplexa	Broiler Feather t2	Soil t1	1	-
Apicomplexa	Broiler Feather t2	Soil t2	1	-
Apicomplexa	Broiler Feather t2	Wastewater t3	1	-
Apicomplexa	Broiler carcass t3	Broiler carcass t3	1	-
Apicomplexa	Broiler carcass t3	Broiler faeces t1	1	-
Apicomplexa	Broiler carcass t3	Broiler faeces t2	1	-
Apicomplexa	Broiler carcass t3	Processing Line t3	1	-
Apicomplexa	Broiler carcass t3	Soil t1	1	-
Apicomplexa	Broiler carcass t3	Soil t2	1	-
Apicomplexa	Broiler carcass t3	Wastewater t3	1	-
Apicomplexa	Broiler faeces t1	Broiler faeces t1	1	-
Apicomplexa	Broiler faeces t1	Broiler faeces t2	1	-
Apicomplexa	Broiler faeces t1	Processing Line t3	1	-
Apicomplexa	Broiler faeces t1	Soil t1	1	-
Apicomplexa	Broiler faeces t1	Soil t2	1	-
Apicomplexa	Broiler faeces t1	Wastewater t3	1	-
Apicomplexa	Broiler faeces t2	Broiler faeces t2	1	-
Apicomplexa	Broiler faeces t2	Processing Line t3	1	-
Apicomplexa	Broiler faeces t2	Soil t1	1	-
Apicomplexa	Broiler faeces t2	Soil t2	1	-
Apicomplexa	Broiler faeces t2	Wastewater t3	1	-
Apicomplexa	Processing Line t3	Processing Line t3	1	-
Apicomplexa	Processing Line t3	Soil t1	1	-
Apicomplexa	Processing Line t3	Soil t2	1	-
Apicomplexa	Processing Line t3	Wastewater t3	1	-
Apicomplexa	Soil t1	Soil t1	1	-
Apicomplexa	Soil t1	Soil t2	1	-
Apicomplexa	Soil t1	Wastewater t3	1	-
Apicomplexa	Soil t2	Soil t2	1	-
Apicomplexa	Soil t2	Wastewater t3	1	-
Apicomplexa	Wastewater t3	Wastewater t3	1	-
Ascomycota	Barn Floor t1	Barn Floor t1	1	-
Ascomycota	Barn Floor t1	Barn Floor t2	1	-
Ascomycota	Barn Floor t1	Broiler Feather t1	1	-
Ascomycota	Barn Floor t1	Broiler Feather t2	1	-
Ascomycota	Barn Floor t1	Broiler carcass t3	1	-
Ascomycota	Barn Floor t1	Broiler faeces t1	1	-
Ascomycota	Barn Floor t1	Broiler faeces t2	1	-
Ascomycota	Barn Floor t1	Processing Line t3	1	-
Ascomycota	Barn Floor t1	Soil t1	1	-
Ascomycota	Barn Floor t1	Soil t2	1	-
Ascomycota	Barn Floor t1	Wastewater t3	1	-
Ascomycota	Barn Floor t2	Barn Floor t2	1	-
Ascomycota	Barn Floor t2	Broiler Feather t1	1	-
Ascomycota	Barn Floor t2	Broiler Feather t2	1	-
Ascomycota	Barn Floor t2	Broiler carcass t3	1	-
Ascomycota	Barn Floor t2	Broiler faeces t1	1	-
Ascomycota	Barn Floor t2	Broiler faeces t2	1	-
Ascomycota	Barn Floor t2	Processing Line t3	1	-
Ascomycota	Barn Floor t2	Soil t1	1	-
Ascomycota	Barn Floor t2	Soil t2	1	-
Ascomycota	Barn Floor t2	Wastewater t3	1	-
Ascomycota	Broiler Feather t1	Broiler Feather t1	1	-
Ascomycota	Broiler Feather t1	Broiler Feather t2	1	-
Ascomycota	Broiler Feather t1	Broiler carcass t3	1	-
Ascomycota	Broiler Feather t1	Broiler faeces t1	1	-
Ascomycota	Broiler Feather t1	Broiler faeces t2	1	-
Ascomycota	Broiler Feather t1	Processing Line t3	1	-
Ascomycota	Broiler Feather t1	Soil t1	1	-
Ascomycota	Broiler Feather t1	Soil t2	1	-
Ascomycota	Broiler Feather t1	Wastewater t3	1	-
Ascomycota	Broiler Feather t2	Broiler Feather t2	1	-
Ascomycota	Broiler Feather t2	Broiler carcass t3	1	-
Ascomycota	Broiler Feather t2	Broiler faeces t1	1	-
Ascomycota	Broiler Feather t2	Broiler faeces t2	1	-
Ascomycota	Broiler Feather t2	Processing Line t3	1	-
Ascomycota	Broiler Feather t2	Soil t1	1	-
Ascomycota	Broiler Feather t2	Soil t2	1	-
Ascomycota	Broiler Feather t2	Wastewater t3	1	-
Ascomycota	Broiler carcass t3	Broiler carcass t3	1	-
Ascomycota	Broiler carcass t3	Broiler faeces t1	1	-
Ascomycota	Broiler carcass t3	Broiler faeces t2	1	-
Ascomycota	Broiler carcass t3	Processing Line t3	1	-
Ascomycota	Broiler carcass t3	Soil t1	1	-
Ascomycota	Broiler carcass t3	Soil t2	1	-
Ascomycota	Broiler carcass t3	Wastewater t3	1	-
Ascomycota	Broiler faeces t1	Broiler faeces t1	1	-
Ascomycota	Broiler faeces t1	Broiler faeces t2	1	-
Ascomycota	Broiler faeces t1	Processing Line t3	1	-
Ascomycota	Broiler faeces t1	Soil t1	1	-
Ascomycota	Broiler faeces t1	Soil t2	1	-
Ascomycota	Broiler faeces t1	Wastewater t3	1	-
Ascomycota	Broiler faeces t2	Broiler faeces t2	1	-
Ascomycota	Broiler faeces t2	Processing Line t3	1	-
Ascomycota	Broiler faeces t2	Soil t1	1	-
Ascomycota	Broiler faeces t2	Soil t2	1	-
Ascomycota	Broiler faeces t2	Wastewater t3	1	-
Ascomycota	Processing Line t3	Processing Line t3	1	-
Ascomycota	Processing Line t3	Soil t1	1	-
Ascomycota	Processing Line t3	Soil t2	1	-
Ascomycota	Processing Line t3	Wastewater t3	1	-
Ascomycota	Soil t1	Soil t1	1	-
Ascomycota	Soil t1	Soil t2	1	-
Ascomycota	Soil t1	Wastewater t3	1	-
Ascomycota	Soil t2	Soil t2	1	-
Ascomycota	Soil t2	Wastewater t3	1	-
Ascomycota	Wastewater t3	Wastewater t3	1	-
Basidiomycota	Barn Floor t1	Barn Floor t1	1	-
Basidiomycota	Barn Floor t1	Barn Floor t2	1	-
Basidiomycota	Barn Floor t1	Broiler Feather t1	1	-
Basidiomycota	Barn Floor t1	Broiler Feather t2	1	-
Basidiomycota	Barn Floor t1	Broiler carcass t3	1	-
Basidiomycota	Barn Floor t1	Broiler faeces t1	1	-
Basidiomycota	Barn Floor t1	Broiler faeces t2	1	-
Basidiomycota	Barn Floor t1	Processing Line t3	1	-
Basidiomycota	Barn Floor t1	Soil t1	1	-
Basidiomycota	Barn Floor t1	Soil t2	1	-
Basidiomycota	Barn Floor t1	Wastewater t3	1	-
Basidiomycota	Barn Floor t2	Barn Floor t2	1	-
Basidiomycota	Barn Floor t2	Broiler Feather t1	1	-
Basidiomycota	Barn Floor t2	Broiler Feather t2	1	-
Basidiomycota	Barn Floor t2	Broiler carcass t3	1	-
Basidiomycota	Barn Floor t2	Broiler faeces t1	1	-
Basidiomycota	Barn Floor t2	Broiler faeces t2	1	-
Basidiomycota	Barn Floor t2	Processing Line t3	1	-
Basidiomycota	Barn Floor t2	Soil t1	1	-
Basidiomycota	Barn Floor t2	Soil t2	1	-
Basidiomycota	Barn Floor t2	Wastewater t3	1	-
Basidiomycota	Broiler Feather t1	Broiler Feather t1	1	-
Basidiomycota	Broiler Feather t1	Broiler Feather t2	1	-
Basidiomycota	Broiler Feather t1	Broiler carcass t3	1	-
Basidiomycota	Broiler Feather t1	Broiler faeces t1	1	-
Basidiomycota	Broiler Feather t1	Broiler faeces t2	1	-
Basidiomycota	Broiler Feather t1	Processing Line t3	1	-
Basidiomycota	Broiler Feather t1	Soil t1	1	-
Basidiomycota	Broiler Feather t1	Soil t2	1	-
Basidiomycota	Broiler Feather t1	Wastewater t3	1	-
Basidiomycota	Broiler Feather t2	Broiler Feather t2	1	-
Basidiomycota	Broiler Feather t2	Broiler carcass t3	1	-
Basidiomycota	Broiler Feather t2	Broiler faeces t1	1	-
Basidiomycota	Broiler Feather t2	Broiler faeces t2	1	-
Basidiomycota	Broiler Feather t2	Processing Line t3	1	-
Basidiomycota	Broiler Feather t2	Soil t1	1	-
Basidiomycota	Broiler Feather t2	Soil t2	1	-
Basidiomycota	Broiler Feather t2	Wastewater t3	1	-
Basidiomycota	Broiler carcass t3	Broiler carcass t3	1	-
Basidiomycota	Broiler carcass t3	Broiler faeces t1	1	-
Basidiomycota	Broiler carcass t3	Broiler faeces t2	1	-
Basidiomycota	Broiler carcass t3	Processing Line t3	1	-
Basidiomycota	Broiler carcass t3	Soil t1	1	-
Basidiomycota	Broiler carcass t3	Soil t2	1	-
Basidiomycota	Broiler carcass t3	Wastewater t3	1	-
Basidiomycota	Broiler faeces t1	Broiler faeces t1	1	-
Basidiomycota	Broiler faeces t1	Broiler faeces t2	1	-
Basidiomycota	Broiler faeces t1	Processing Line t3	1	-
Basidiomycota	Broiler faeces t1	Soil t1	1	-
Basidiomycota	Broiler faeces t1	Soil t2	1	-
Basidiomycota	Broiler faeces t1	Wastewater t3	1	-
Basidiomycota	Broiler faeces t2	Broiler faeces t2	1	-
Basidiomycota	Broiler faeces t2	Processing Line t3	1	-
Basidiomycota	Broiler faeces t2	Soil t1	1	-
Basidiomycota	Broiler faeces t2	Soil t2	1	-
Basidiomycota	Broiler faeces t2	Wastewater t3	1	-
Basidiomycota	Processing Line t3	Processing Line t3	1	-
Basidiomycota	Processing Line t3	Soil t1	1	-
Basidiomycota	Processing Line t3	Soil t2	1	-
Basidiomycota	Processing Line t3	Wastewater t3	1	-
Basidiomycota	Soil t1	Soil t1	1	-
Basidiomycota	Soil t1	Soil t2	1	-
Basidiomycota	Soil t1	Wastewater t3	1	-
Basidiomycota	Soil t2	Soil t2	1	-
Basidiomycota	Soil t2	Wastewater t3	1	-
Basidiomycota	Wastewater t3	Wastewater t3	1	-
