# Supplementary material for: Machine learning and metagenomics enhance surveillance of antimicrobial resistance in chicken production in China
Source: Research Square preprint supplement (doi:10.21203/rs.3.rs-2458989/v1), 2023-01-13
Supplement: Supplementary file 5 [file 6ea19deb1665aef7675d1a89.xlsx]

## Sheet: All
Kingdom	Phylum	Class	Order	Family	Genus	Species	NCBI_tax_id	SDPD4YMT2-05	SDPD4YMT2-04	SDPD4YMT2-03	SDPD4YMT2-02	SDPD4YMT2-01	SDPD4YMT1-05	SDPD4YMT1-04	SDPD4YMT1-03	SDPD4YMT1-02	SDPD4YMT1-01	SDPD4TWT3-03	SDPD4TWT3-02	SDPD4TRT2-03	SDPD4TRT2-01	SDPD4TRT1-03	SDPD4TRT1-01	SDPD4JTT3-15	SDPD4JTT3-14	SDPD4JTT3-12	SDPD4JTT3-11	SDPD4JTT3-10	SDPD4JTT3-09	SDPD4JTT3-05	SDPD4JTT3-01	SDPD4JFT2-17	SDPD4JFT2-13	SDPD4JFT2-11	SDPD4JFT2-09	SDPD4JFT2-07	SDPD4JFT2-05	SDPD4JFT2-03	SDPD4JFT2-01	SDPD4JFT1-18	SDPD4JFT1-17	SDPD4JFT1-15	SDPD4JFT1-13	SDPD4JFT1-08	SDPD4JFT1-05	SDPD4JFT1-01	SDPD4HJT3-03	SDPD4HJT3-02	SDPD4HJT3-01
Archaea							2157	0	0	0	0	0	0	0	0	0	0	0	0	0.28203	0	0	0	0	0	0	0	0	0	0	0	0	0	0	0	0	0	0	0	0	0	0	0	0	0	0	0	0	0
Archaea	Euryarchaeota						2157|28890	0	0	0	0	0	0	0	0	0	0	0	0	0	0	0	0	0	0	0	0	0	0	0	0	0	0	0	0	0	0	0	0	0	0	0	0	0	0	0	0	0	0
Archaea	Euryarchaeota	Halobacteria					2157|28890|183963	0	0	0	0	0	0	0	0	0	0	0	0	0	0	0	0	0	0	0	0	0	0	0	0	0	0	0	0	0	0	0	0	0	0	0	0	0	0	0	0	0	0
Archaea	Euryarchaeota	Halobacteria	Halobacteriales				2157|28890|183963|2235	0	0	0	0	0	0	0	0	0	0	0	0	0	0	0	0	0	0	0	0	0	0	0	0	0	0	0	0	0	0	0	0	0	0	0	0	0	0	0	0	0	0
Archaea	Euryarchaeota	Halobacteria	Halobacteriales	Halococcaceae			2157|28890|183963|2235|1963270	0	0	0	0	0	0	0	0	0	0	0	0	0	0	0	0	0	0	0	0	0	0	0	0	0	0	0	0	0	0	0	0	0	0	0	0	0	0	0	0	0	0
Archaea	Euryarchaeota	Halobacteria	Halobacteriales	Halococcaceae	Halococcus		2157|28890|183963|2235|1963270|2249	0	0	0	0	0	0	0	0	0	0	0	0	0	0	0	0	0	0	0	0	0	0	0	0	0	0	0	0	0	0	0	0	0	0	0	0	0	0	0	0	0	0
Archaea	Euryarchaeota	Halobacteria	Halobacteriales	Halococcaceae	Halococcus	Halococcus_morrhuae	2157|28890|183963|2235|1963270|2249|2250	0	0	0	0	0	0	0	0	0	0	0	0	0	0	0	0	0	0	0	0	0	0	0	0	0	0	0	0	0	0	0	0	0	0	0	0	0	0	0	0	0	0
Archaea	Euryarchaeota	Halobacteria	Halobacteriales	Halococcaceae	Halococcus	Halococcus_thailandensis	2157|28890|183963|2235|1963270|2249|335952	0	0	0	0	0	0	0	0	0	0	0	0	0	0	0	0	0	0	0	0	0	0	0	0	0	0	0	0	0	0	0	0	0	0	0	0	0	0	0	0	0	0
Archaea	Thaumarchaeota						2157|651137	0	0	0	0	0	0	0	0	0	0	0	0	0.28203	0	0	0	0	0	0	0	0	0	0	0	0	0	0	0	0	0	0	0	0	0	0	0	0	0	0	0	0	0
Archaea	Thaumarchaeota	Nitrososphaeria					2157|651137|1643678	0	0	0	0	0	0	0	0	0	0	0	0	0.28203	0	0	0	0	0	0	0	0	0	0	0	0	0	0	0	0	0	0	0	0	0	0	0	0	0	0	0	0	0
Archaea	Thaumarchaeota	Nitrososphaeria	Nitrososphaerales				2157|651137|1643678|1033996	0	0	0	0	0	0	0	0	0	0	0	0	0.28203	0	0	0	0	0	0	0	0	0	0	0	0	0	0	0	0	0	0	0	0	0	0	0	0	0	0	0	0	0
Archaea	Thaumarchaeota	Nitrososphaeria	Nitrososphaerales	Nitrososphaeraceae			2157|651137|1643678|1033996|1033997	0	0	0	0	0	0	0	0	0	0	0	0	0.28203	0	0	0	0	0	0	0	0	0	0	0	0	0	0	0	0	0	0	0	0	0	0	0	0	0	0	0	0	0
Archaea	Thaumarchaeota	Nitrososphaeria	Nitrososphaerales	Nitrososphaeraceae	Candidatus_Nitrosocosmicus		2157|651137|1643678|1033996|1033997|1826864	0	0	0	0	0	0	0	0	0	0	0	0	0.28203	0	0	0	0	0	0	0	0	0	0	0	0	0	0	0	0	0	0	0	0	0	0	0	0	0	0	0	0	0
Archaea	Thaumarchaeota	Nitrososphaeria	Nitrososphaerales	Nitrososphaeraceae	Candidatus_Nitrosocosmicus	Candidatus_Nitrosocosmicus_oleophilus	2157|651137|1643678|1033996|1033997|1826864|1353260	0	0	0	0	0	0	0	0	0	0	0	0	0.28203	0	0	0	0	0	0	0	0	0	0	0	0	0	0	0	0	0	0	0	0	0	0	0	0	0	0	0	0	0
Archaea	Thaumarchaeota	Thaumarchaeota_unclassified						0	0	0	0	0	0	0	0	0	0	0	0	0	0	0	0	0	0	0	0	0	0	0	0	0	0	0	0	0	0	0	0	0	0	0	0	0	0	0	0	0	0
Archaea	Thaumarchaeota	Thaumarchaeota_unclassified	Nitrosopumilales				2157|651137||31932	0	0	0	0	0	0	0	0	0	0	0	0	0	0	0	0	0	0	0	0	0	0	0	0	0	0	0	0	0	0	0	0	0	0	0	0	0	0	0	0	0	0
Archaea	Thaumarchaeota	Thaumarchaeota_unclassified	Nitrosopumilales	Nitrosopumilaceae			2157|651137||31932|338190	0	0	0	0	0	0	0	0	0	0	0	0	0	0	0	0	0	0	0	0	0	0	0	0	0	0	0	0	0	0	0	0	0	0	0	0	0	0	0	0	0	0
Archaea	Thaumarchaeota	Thaumarchaeota_unclassified	Nitrosopumilales	Nitrosopumilaceae	Nitrosoarchaeum		2157|651137||31932|338190|1007082	0	0	0	0	0	0	0	0	0	0	0	0	0	0	0	0	0	0	0	0	0	0	0	0	0	0	0	0	0	0	0	0	0	0	0	0	0	0	0	0	0	0
Archaea	Thaumarchaeota	Thaumarchaeota_unclassified	Nitrosopumilales	Nitrosopumilaceae	Nitrosoarchaeum	Nitrosarchaeum_koreense	2157|651137||31932|338190|1007082|1088740	0	0	0	0	0	0	0	0	0	0	0	0	0	0	0	0	0	0	0	0	0	0	0	0	0	0	0	0	0	0	0	0	0	0	0	0	0	0	0	0	0	0
Bacteria							2	100.0	100.0	100.0	100.0	100.0	100.0	100.0	100.0	99.96416	100.0	100.0	100.0	99.71797	100.0	100.0	100.0	100.0	100.0	100.0	100.0	100.0	100.0	100.0	100.0	100.0	100.0	100.0	99.99832	100.0	99.97334	100.0	99.99974	99.94726	100.0	100.0	100.0	100.0	100.0	100.0	100.0	100.0	100.0
Bacteria	Actinobacteria						2|201174	3.54311	3.54311	6.4355	4.18764	5.80577	17.92044	14.63065	20.33963	12.1718	12.1382	0.0044	0.15668	1.87898	47.55561	11.84403	25.29691	0	0	0	0	0	4.67362	0	1.55774	2.77982	1.70835	0.31915	0.14939	0.12413	6.28907	6.04965	2.78807	9.36345	6.75156	45.2382	39.53021	1.97723	13.19339	4.98991	0.3715	6.5241	6.93013
Bacteria	Actinobacteria	Actinobacteria					2|201174|1760	3.29168	3.29168	5.65818	3.77042	5.04204	17.47111	14.12239	19.77787	11.72265	11.67627	0.0044	0.15668	1.74263	47.21303	11.84403	25.28657	0	0	0	0	0	4.67362	0	1.55774	2.77226	1.70248	0.30876	0.07106	0.11179	6.27728	6.03226	2.78698	9.3572	6.75156	45.2382	39.52408	1.96491	13.19339	4.9857	0.3715	6.5241	6.93013
Bacteria	Actinobacteria	Actinobacteria_unclassified						0	0	0	0	0	0	0	0	0	0	0	0	0	0	0	0	0	0	0	0	0	0	0	0	0	0	0	0	0	0	0	0	0	0	0	0	0	0	0	0	0	0
Bacteria	Actinobacteria	Actinobacteria_unclassified	Actinobacteria_unclassified					0	0	0	0	0	0	0	0	0	0	0	0	0	0	0	0	0	0	0	0	0	0	0	0	0	0	0	0	0	0	0	0	0	0	0	0	0	0	0	0	0	0
Bacteria	Actinobacteria	Actinobacteria_unclassified	Actinobacteria_unclassified	Actinobacteria_unclassified				0	0	0	0	0	0	0	0	0	0	0	0	0	0	0	0	0	0	0	0	0	0	0	0	0	0	0	0	0	0	0	0	0	0	0	0	0	0	0	0	0	0
Bacteria	Actinobacteria	Actinobacteria_unclassified	Actinobacteria_unclassified	Actinobacteria_unclassified	Actinobacteria_unclassified			0	0	0	0	0	0	0	0	0	0	0	0	0	0	0	0	0	0	0	0	0	0	0	0	0	0	0	0	0	0	0	0	0	0	0	0	0	0	0	0	0	0
Bacteria	Actinobacteria	Actinobacteria_unclassified	Actinobacteria_unclassified	Actinobacteria_unclassified	Actinobacteria_unclassified	Actinobacteria_bacterium_HGW_Actinobacteria_11	2|201174|||||2013646	0	0	0	0	0	0	0	0	0	0	0	0	0	0	0	0	0	0	0	0	0	0	0	0	0	0	0	0	0	0	0	0	0	0	0	0	0	0	0	0	0	0
Bacteria	Actinobacteria	Actinobacteria	Actinobacteria_unclassified	Actinobacteria_unclassified	Actinobacteria_unclassified	Actinobacteria_bacterium_DSM_45722	2|201174|1760||||1566299	0	0	0	0	0	0	0	0	0	0	0	0	0	0.04574	0	0	0	0	0	0	0	0	0	0	0	0	0	0	0	0	0	0	0	0	0	0	0	0	0	0	0	0
Bacteria	Actinobacteria	Actinobacteria	Actinobacteria_unclassified	Actinobacteria_unclassified	Thermobispora		2|201174|1760|||147067	0	0	0	0	0	0	0	0	0	0	0	0	0	0	0	0.04	0	0	0	0	0	0	0	0	0	0	0	0	0	0	0	0	0	0	0	0	0	0	0	0	0	0
Bacteria	Actinobacteria	Actinobacteria	Actinobacteria_unclassified	Actinobacteria_unclassified	Thermobispora	Thermobispora_bispora	2|201174|1760|||147067|2006	0	0	0	0	0	0	0	0	0	0	0	0	0	0	0	0.04	0	0	0	0	0	0	0	0	0	0	0	0	0	0	0	0	0	0	0	0	0	0	0	0	0	0
Bacteria	Actinobacteria	Actinobacteria	Actinomycetales				2|201174|1760|2037	0.00648	0.00648	0.05663	0.00636	0.04997	0.03112	0.01029	0.0361	0.01249	0.00895	0	0	0	0	0	0.06713	0	0	0	0	0	0	0	0	0.06465	0.05795	0.00708	0.00429	0.00103	0.26807	0.48611	0.37514	0.05055	0.00817	0.06527	0.3385	0.00384	0	0	0	0	0
Bacteria	Actinobacteria	Actinobacteria	Actinomycetales	Actinomycetaceae			2|201174|1760|2037|2049	0.00648	0.00648	0.05663	0.00636	0.04997	0.03112	0.01029	0.0361	0.01249	0.00895	0	0	0	0	0	0.06713	0	0	0	0	0	0	0	0	0.06465	0.05795	0.00708	0.00429	0.00103	0.26807	0.48611	0.37514	0.05055	0.00817	0.06527	0.3385	0.00384	0	0	0	0	0
Bacteria	Actinobacteria	Actinobacteria	Actinomycetales	Actinomycetaceae	Actinomyces		2|201174|1760|2037|2049|1654	0	0	0	0	0	0	0	0	0	0	0	0	0	0	0	0.05035	0	0	0	0	0	0	0	0	0	0	0	0	0	0.00378	0.01795	0.00061	0.00389	0	0.00605	0.05596	0	0	0	0	0	0
Bacteria	Actinobacteria	Actinobacteria	Actinomycetales	Actinomycetaceae	Actinomyces	Actinomyces_nasicola	2|201174|1760|2037|2049|1654|208480	0	0	0	0	0	0	0	0	0	0	0	0	0	0	0	0.05035	0	0	0	0	0	0	0	0	0	0	0	0	0	0.00378	0.01795	0.00061	0.00389	0	0.00605	0.05596	0	0	0	0	0	0
Bacteria	Actinobacteria	Actinobacteria	Actinomycetales	Actinomycetaceae	Actinomycetaceae_unclassified			0.00648	0.00648	0.05663	0.00636	0.04997	0.03112	0.01029	0.0361	0.01249	0.00895	0	0	0	0	0	0.01678	0	0	0	0	0	0	0	0	0.06465	0.05795	0.00708	0.00429	0.00103	0.26429	0.46816	0.37452	0.04666	0.00817	0.05923	0.28255	0.00384	0	0	0	0	0
Bacteria	Actinobacteria	Actinobacteria	Actinomycetales	Actinomycetaceae	Actinomycetaceae_unclassified		2|201174|1760|2037|2049|	0	0	0	0	0	0	0	0	0	0	0	0	0	0	0	0	0	0	0	0	0	0	0	0	0	0	0	0	0	0	0	0	0	0	0	0	0	0	0	0	0	0
Bacteria	Actinobacteria	Actinobacteria	Actinomycetales	Actinomycetaceae	Actinomycetaceae_unclassified	Actinomycetaceae_bacterium_sk1b4	2|201174|1760|2037|2049||2175228	0.00648	0.00648	0.05663	0.00636	0.04997	0.03112	0.01029	0.0361	0.01249	0.00895	0	0	0	0	0	0.01678	0	0	0	0	0	0	0	0	0.06465	0.05795	0.00708	0.00429	0.00103	0.26429	0.46816	0.37452	0.04666	0.00817	0.05923	0.28255	0.00384	0	0	0	0	0
Bacteria	Actinobacteria	Actinobacteria	Bifidobacteriales				2|201174|1760|85004	2.66602	2.66602	2.89721	3.04772	2.56753	4.80537	5.45006	5.3682	2.94505	4.99607	0	0	0	0	0	0	0	0	0	0	0	0	0	0	0.03875	0.07769	0.0192	0.05606	0.08884	0.21476	0.10776	0.02729	0.27879	0.00337	0.01436	0.04649	0.08535	0.27148	0.30935	0	0	0
Bacteria	Actinobacteria	Actinobacteria	Bifidobacteriales	Bifidobacteriaceae			2|201174|1760|85004|31953	2.66602	2.66602	2.89721	3.04772	2.56753	4.80537	5.45006	5.3682	2.94505	4.99607	0	0	0	0	0	0	0	0	0	0	0	0	0	0	0.03875	0.07769	0.0192	0.05606	0.08884	0.21476	0.10776	0.02729	0.27879	0.00337	0.01436	0.04649	0.08535	0.27148	0.30935	0	0	0
Bacteria	Actinobacteria	Actinobacteria	Bifidobacteriales	Bifidobacteriaceae	Bifidobacterium		2|201174|1760|85004|31953|1678	2.66602	2.66602	2.89721	3.04772	2.56753	4.80537	5.45006	5.3682	2.94505	4.99607	0	0	0	0	0	0	0	0	0	0	0	0	0	0	0.03875	0.07769	0.0192	0.05606	0.08884	0.21476	0.10776	0.02729	0.27879	0.00337	0.01436	0.04649	0.08535	0.27148	0.30935	0	0	0
Bacteria	Actinobacteria	Actinobacteria	Bifidobacteriales	Bifidobacteriaceae	Bifidobacterium	Bifidobacterium_adolescentis	2|201174|1760|85004|31953|1678|1680	0	0	0	0	0	0	0	0	0	0	0	0	0	0	0	0	0	0	0	0	0	0	0	0	0	0	0	0	0	0	0	0	0	0	0	0	0	0	0	0	0	0
Bacteria	Actinobacteria	Actinobacteria	Bifidobacteriales	Bifidobacteriaceae	Bifidobacterium	Bifidobacterium_dentium	2|201174|1760|85004|31953|1678|1689	0	0	0	0	0	0	0	0	0	0	0	0	0	0	0	0	0	0	0	0	0	0	0	0	0	0	0	0	0	0	0	0	0	0	0	0	0	0	0	0	0	0
Bacteria	Actinobacteria	Actinobacteria	Bifidobacteriales	Bifidobacteriaceae	Bifidobacterium	Bifidobacterium_gallinarum	2|201174|1760|85004|31953|1678|78344	0.82534	0.82534	0.6108	0.56697	0.52776	0.83514	0.95274	0.88609	0.61349	0.85465	0	0	0	0	0	0	0	0	0	0	0	0	0	0	0.01353	0.01744	0.00414	0.00705	0.01834	0.03217	0.0174	0.0051	0.04221	0.00102	0.00326	0.00992	0.00917	0.05532	0.09055	0	0	0
Bacteria	Actinobacteria	Actinobacteria	Bifidobacteriales	Bifidobacteriaceae	Bifidobacterium	Bifidobacterium_longum	2|201174|1760|85004|31953|1678|216816	0	0	0	0	0	0	0	0	0	0	0	0	0	0	0	0	0	0	0	0	0	0	0	0	0	0	0	0	0	0	0	0	0	0	0	0	0	0	0	0	0	0
Bacteria	Actinobacteria	Actinobacteria	Bifidobacteriales	Bifidobacteriaceae	Bifidobacterium	Bifidobacterium_pseudocatenulatum	2|201174|1760|85004|31953|1678|28026	0	0	0	0	0	0	0	0	0	0	0	0	0	0	0	0	0	0	0	0	0	0	0	0	0	0	0	0	0	0	0	0	0	0	0	0	0	0	0	0	0	0
Bacteria	Actinobacteria	Actinobacteria	Bifidobacteriales	Bifidobacteriaceae	Bifidobacterium	Bifidobacterium_pseudolongum	2|201174|1760|85004|31953|1678|1694	0	0	0	0	0.00279	0	0	0	0	0	0	0	0	0	0	0	0	0	0	0	0	0	0	0	0	0	0	0	0	0.00145	0	0	0	0	0	0	0	0	0	0	0	0
Bacteria	Actinobacteria	Actinobacteria	Bifidobacteriales	Bifidobacteriaceae	Bifidobacterium	Bifidobacterium_pullorum	2|201174|1760|85004|31953|1678|78448	0.9879	0.9879	1.00766	1.2349	0.93056	2.1626	2.55171	2.51986	1.2144	2.39885	0	0	0	0	0	0	0	0	0	0	0	0	0	0	0.00981	0.02954	0.00616	0.03339	0.04351	0.11145	0.04304	0.01275	0.13245	0.00235	0.00698	0.02374	0.04565	0.11471	0.11337	0	0	0
Bacteria	Actinobacteria	Actinobacteria	Bifidobacteriales	Bifidobacteriaceae	Bifidobacterium	Bifidobacterium_saeculare	2|201174|1760|85004|31953|1678|78257	0.85278	0.85278	1.27875	1.24585	1.10642	1.80763	1.94561	1.96225	1.11716	1.74257	0	0	0	0	0	0	0	0	0	0	0	0	0	0	0.01541	0.03072	0.0089	0.01562	0.02698	0.0697	0.04733	0.00944	0.10413	0	0.00412	0.01282	0.03053	0.10145	0.10543	0	0	0
Bacteria	Actinobacteria	Actinobacteria	Bifidobacteriales	Bifidobacteriaceae	Bifidobacterium	Bifidobacterium_subtile	2|201174|1760|85004|31953|1678|77635	0	0	0	0	0	0	0	0	0	0	0	0	0	0	0	0	0	0	0	0	0	0	0	0	0	0	0	0	0	0	0	0	0	0	0	0	0	0	0	0	0	0
Bacteria	Actinobacteria	Actinobacteria	Bifidobacteriales	Bifidobacteriaceae	Gardnerella		2|201174|1760|85004|31953|2701	0	0	0	0	0	0	0	0	0	0	0	0	0	0	0	0	0	0	0	0	0	0	0	0	0	0	0	0	0	0	0	0	0	0	0	0	0	0	0	0	0	0
Bacteria	Actinobacteria	Actinobacteria	Bifidobacteriales	Bifidobacteriaceae	Gardnerella	Gardnerella_vaginalis	2|201174|1760|85004|31953|2701|2702	0	0	0	0	0	0	0	0	0	0	0	0	0	0	0	0	0	0	0	0	0	0	0	0	0	0	0	0	0	0	0	0	0	0	0	0	0	0	0	0	0	0
Bacteria	Actinobacteria	Actinobacteria	Catenulisporales				2|201174|1760|414714	0	0	0	0	0	0	0	0	0	0	0	0	0	0	0	0	0	0	0	0	0	0	0	0	0	0	0	0	0	0	0	0	0	0	0	0	0	0	0	0	0	0
Bacteria	Actinobacteria	Actinobacteria	Catenulisporales	Actinospicaceae			2|201174|1760|414714|414713	0	0	0	0	0	0	0	0	0	0	0	0	0	0	0	0	0	0	0	0	0	0	0	0	0	0	0	0	0	0	0	0	0	0	0	0	0	0	0	0	0	0
Bacteria	Actinobacteria	Actinobacteria	Catenulisporales	Actinospicaceae	Actinospica		2|201174|1760|414714|414713|414715	0	0	0	0	0	0	0	0	0	0	0	0	0	0	0	0	0	0	0	0	0	0	0	0	0	0	0	0	0	0	0	0	0	0	0	0	0	0	0	0	0	0
Bacteria	Actinobacteria	Actinobacteria	Catenulisporales	Actinospicaceae	Actinospica	Actinospica_robiniae	2|201174|1760|414714|414713|414715|304901	0	0	0	0	0	0	0	0	0	0	0	0	0	0	0	0	0	0	0	0	0	0	0	0	0	0	0	0	0	0	0	0	0	0	0	0	0	0	0	0	0	0
Bacteria	Actinobacteria	Actinobacteria	Catenulisporales	Catenulisporaceae			2|201174|1760|414714|414877	0	0	0	0	0	0	0	0	0	0	0	0	0	0	0	0	0	0	0	0	0	0	0	0	0	0	0	0	0	0	0	0	0	0	0	0	0	0	0	0	0	0
Bacteria	Actinobacteria	Actinobacteria	Catenulisporales	Catenulisporaceae	Catenulispora		2|201174|1760|414714|414877|414878	0	0	0	0	0	0	0	0	0	0	0	0	0	0	0	0	0	0	0	0	0	0	0	0	0	0	0	0	0	0	0	0	0	0	0	0	0	0	0	0	0	0
Bacteria	Actinobacteria	Actinobacteria	Catenulisporales	Catenulisporaceae	Catenulispora	Catenulispora_acidiphila	2|201174|1760|414714|414877|414878|304895	0	0	0	0	0	0	0	0	0	0	0	0	0	0	0	0	0	0	0	0	0	0	0	0	0	0	0	0	0	0	0	0	0	0	0	0	0	0	0	0	0	0
Bacteria	Actinobacteria	Actinobacteria	Corynebacteriales				2|201174|1760|85007	0.61917	0.61917	2.70345	0.71634	2.41927	12.54585	8.64797	14.33532	8.67599	6.66586	0	0	0.75147	15.7503	3.55702	14.97814	0	0	0	0	0	0	0	0	2.66733	1.56684	0.28248	0.01072	0.02192	5.75249	5.27446	2.38072	8.97176	6.7377	44.83519	38.81536	1.87572	12.88944	4.67634	0.3715	6.5241	6.93013
Bacteria	Actinobacteria	Actinobacteria	Corynebacteriales	Corynebacteriaceae			2|201174|1760|85007|1653	0.61917	0.61917	2.70345	0.71634	2.41927	12.54585	8.64797	14.33532	8.67599	6.66586	0	0	0	3.76532	1.10403	10.28928	0	0	0	0	0	0	0	0	2.66733	1.56684	0.28248	0.01072	0.02192	5.75249	5.27446	2.38072	8.97176	6.7377	44.83519	38.81536	1.87572	12.88944	4.67634	0.11365	0	0
Bacteria	Actinobacteria	Actinobacteria	Corynebacteriales	Corynebacteriaceae	Corynebacterium		2|201174|1760|85007|1653|1716	0.61917	0.61917	2.70345	0.71634	2.41927	12.54585	8.64797	14.33532	8.67599	6.66586	0	0	0	3.76532	1.10403	10.28928	0	0	0	0	0	0	0	0	2.66733	1.56684	0.28248	0.01072	0.02192	5.75249	5.27446	2.38072	8.97176	6.7377	44.83519	38.81536	1.87572	12.88944	4.67634	0.11365	0	0
Bacteria	Actinobacteria	Actinobacteria	Corynebacteriales	Corynebacteriaceae	Corynebacterium	Corynebacterium_ammoniagenes	2|201174|1760|85007|1653|1716|1697	0	0	0	0	0	0.00046	0	0	0.0046	0	0	0	0	0	0	0.01015	0	0	0	0	0	0	0	0	0	0	0	0	0	0	0	0	0	0	0.00089	0	0	0	0	0	0	0
Bacteria	Actinobacteria	Actinobacteria	Corynebacteriales	Corynebacteriaceae	Corynebacterium	Corynebacterium_amycolatum	2|201174|1760|85007|1653|1716|43765	0.06091	0.06091	0.41416	0.05768	0.1471	0.10451	0.05339	0.13396	0.15517	0.04229	0	0	0	0	0	0	0	0	0	0	0	0	0	0	0	0	0	0	0	0.01052	0.00704	0.00867	0	0.02536	0.00021	0	0	0	0	0	0	0
Bacteria	Actinobacteria	Actinobacteria	Corynebacteriales	Corynebacteriaceae	Corynebacterium	Corynebacterium_callunae	2|201174|1760|85007|1653|1716|1721	0	0	0	0	0	0	0	0	0	0	0	0	0	0	0	0	0	0	0	0	0	0	0	0	0	0	0	0	0	0	0	0	0	0	0	0	0	0	0	0	0	0
Bacteria	Actinobacteria	Actinobacteria	Corynebacteriales	Corynebacteriaceae	Corynebacterium	Corynebacterium_casei	2|201174|1760|85007|1653|1716|160386	0	0	0	0	0	0	0	0	0	0	0	0	0	0	0	0.19134	0	0	0	0	0	0	0	0	0	0	0	0	0	0	0	0	0.00461	0.17678	0.01462	0.00471	0	0	0	0	0	0
Bacteria	Actinobacteria	Actinobacteria	Corynebacteriales	Corynebacteriaceae	Corynebacterium	Corynebacterium_crudilactis	2|201174|1760|85007|1653|1716|1652495	0	0	0	0	0	0	0	0	0	0	0	0	0	0	0	0	0	0	0	0	0	0	0	0	0	0	0	0	0	0	0	0	0	0	0.00178	0.0076	0	0	0	0	0	0
Bacteria	Actinobacteria	Actinobacteria	Corynebacteriales	Corynebacteriaceae	Corynebacterium	Corynebacterium_deserti	2|201174|1760|85007|1653|1716|1408191	0	0	0	0	0	0	0	0	0	0	0	0	0	0	0	0	0	0	0	0	0	0	0	0	0	0	0	0	0	0	0	0	0.00056	0	0	0	0	0	0	0	0	0
Bacteria	Actinobacteria	Actinobacteria	Corynebacteriales	Corynebacteriaceae	Corynebacterium	Corynebacterium_efficiens	2|201174|1760|85007|1653|1716|152794	0	0	0	0	0	0	0	0	0	0	0	0	0	0	0	0.02856	0	0	0	0	0	0	0	0	0	0	0	0	0	0	0	0	0	0	0	0	0	0	0	0	0	0
Bacteria	Actinobacteria	Actinobacteria	Corynebacteriales	Corynebacteriaceae	Corynebacterium	Corynebacterium_falsenii	2|201174|1760|85007|1653|1716|108486	0	0	0	0	0	0	0	0	0	0	0	0	0	0	0	0	0	0	0	0	0	0	0	0	0	0	0	0	0	0	0	0	0	0	0	0	0	0	0	0	0	0
Bacteria	Actinobacteria	Actinobacteria	Corynebacteriales	Corynebacteriaceae	Corynebacterium	Corynebacterium_freneyi	2|201174|1760|85007|1653|1716|134034	0	0	0.00428	0	0.01784	0.03446	0.01674	0.02235	0.01279	0.02475	0	0	0	0	0	0.0544	0	0	0	0	0	0	0	0	0.00326	0.02575	0.00455	0	0	0.2372	0.13123	0.04601	0.05617	0.05953	0.20803	0.99415	0.01473	0.03999	0.01441	0	0	0
Bacteria	Actinobacteria	Actinobacteria	Corynebacteriales	Corynebacteriaceae	Corynebacterium	Corynebacterium_glutamicum	2|201174|1760|85007|1653|1716|1718	0.06	0.06	0.31952	0.08184	0.29503	3.13888	2.1116	3.38629	2.05299	1.60737	0	0	0	0	0	0.86607	0	0	0	0	0	0	0	0	0.41761	1.18778	0.1403	0.00287	0.00287	1.71144	1.12898	0.69586	4.4482	2.59234	11.21537	18.0529	0.71383	8.56277	3.82661	0	0	0
Bacteria	Actinobacteria	Actinobacteria	Corynebacteriales	Corynebacteriaceae	Corynebacterium	Corynebacterium_humireducens	2|201174|1760|85007|1653|1716|1223514	0	0	0	0	0	0	0	0	0	0	0	0	0	0	0	0.0216	0	0	0	0	0	0	0	0	0	0	0	0	0	0.00878	0.00082	0	0.00132	0	0.01621	0.08336	0	0	0	0	0	0
Bacteria	Actinobacteria	Actinobacteria	Corynebacteriales	Corynebacteriaceae	Corynebacterium	Corynebacterium_kroppenstedtii	2|201174|1760|85007|1653|1716|161879	0	0	0	0	0	0	0	0	0	0	0	0	0	0	0	0	0	0	0	0	0	0	0	0	0	0	0	0	0	0	0	0	0	0	0	0	0	0	0	0	0	0
Bacteria	Actinobacteria	Actinobacteria	Corynebacteriales	Corynebacteriaceae	Corynebacterium	Corynebacterium_nuruki	2|201174|1760|85007|1653|1716|1032851	0	0	0	0	0	0	0	0	0	0	0	0	0	0	0	0.42277	0	0	0	0	0	0	0	0	0	0	0	0	0	0	0	0	0	0	0	0	0	0	0	0	0	0
Bacteria	Actinobacteria	Actinobacteria	Corynebacteriales	Corynebacteriaceae	Corynebacterium	Corynebacterium_pollutisoli	2|201174|1760|85007|1653|1716|1610489	0	0	0.02259	0.00047	0.02346	0.04385	0.01042	0.06497	0.05316	0.0062	0	0	0	0	0	0.0691	0	0	0	0	0	0	0	0	0.00349	0.00841	0.01495	0	0	0.16024	0.15719	0.01431	0.2591	0.07727	0.43987	2.2745	0.01001	0.05214	0.00221	0	0	0
Bacteria	Actinobacteria	Actinobacteria	Corynebacteriales	Corynebacteriaceae	Corynebacterium	Corynebacterium_stationis	2|201174|1760|85007|1653|1716|1705	0.31286	0.31286	1.00328	0.3287	1.05102	8.28019	5.83437	9.77994	5.68942	4.52812	0	0	0	0.81886	0.09873	7.89781	0	0	0	0	0	0	0	0	2.18592	0.09498	0.06109	0.00488	0.01587	1.43262	1.44058	0.42341	3.5972	3.30734	31.13243	6.8788	1.00037	4.05232	0.76541	0	0	0
Bacteria	Actinobacteria	Actinobacteria	Corynebacteriales	Corynebacteriaceae	Corynebacterium	Corynebacterium_testudinoris	2|201174|1760|85007|1653|1716|136857	0	0	0	0	0	0	0	0	0	0	0	0	0	0	0	0	0	0	0	0	0	0	0	0	0	0	0	0	0	0	0	0	0	0	0	0	0	0	0	0.11365	0	0
Bacteria	Actinobacteria	Actinobacteria	Corynebacteriales	Corynebacteriaceae	Corynebacterium	Corynebacterium_urealyticum	2|201174|1760|85007|1653|1716|43771	0	0	0	0	0.00097	0	0	0	0	0	0	0	0	0	0	0	0	0	0	0	0	0	0	0	0.00045	0	0	0	0	0.00153	0.00064	0	0	0	0	0	0	0	0	0	0	0
Bacteria	Actinobacteria	Actinobacteria	Corynebacteriales	Corynebacteriaceae	Corynebacterium	Corynebacterium_variabile	2|201174|1760|85007|1653|1716|1727	0.02701	0.02701	0.11784	0.02808	0.10364	0.00053	0	0.0007	0.01077	0	0	0	0	0	0	0	0	0	0	0	0	0	0	0	0.0147	0	0	0.00296	0.00114	0.10441	0.07673	0.10413	0	0	0	0	0	0	0	0	0	0
Bacteria	Actinobacteria	Actinobacteria	Corynebacteriales	Corynebacteriaceae	Corynebacterium	Corynebacterium_xerosis	2|201174|1760|85007|1653|1716|1725	0.15839	0.15839	0.82178	0.21956	0.78022	0.94297	0.62144	0.94711	0.69709	0.45713	0	0	0	2.94646	1.0053	0.72749	0	0	0	0	0	0	0	0	0.04189	0.24991	0.06159	0	0.00203	2.08576	2.33124	1.08833	0.6046	0.49908	1.80579	10.51933	0.13679	0.18222	0.06771	0	0	0
Bacteria	Actinobacteria	Actinobacteria	Corynebacteriales	Dietziaceae			2|201174|1760|85007|85029	0	0	0	0	0	0	0	0	0	0	0	0	0	1.27571	0.30152	0.19118	0	0	0	0	0	0	0	0	0	0	0	0	0	0	0	0	0	0	0	0	0	0	0	0	0	0
Bacteria	Actinobacteria	Actinobacteria	Corynebacteriales	Dietziaceae	Dietzia		2|201174|1760|85007|85029|37914	0	0	0	0	0	0	0	0	0	0	0	0	0	1.27571	0.30152	0.19118	0	0	0	0	0	0	0	0	0	0	0	0	0	0	0	0	0	0	0	0	0	0	0	0	0	0
Bacteria	Actinobacteria	Actinobacteria	Corynebacteriales	Dietziaceae	Dietzia	Dietzia_alimentaria	2|201174|1760|85007|85029|37914|665550	0	0	0	0	0	0	0	0	0	0	0	0	0	1.27571	0.30152	0.06209	0	0	0	0	0	0	0	0	0	0	0	0	0	0	0	0	0	0	0	0	0	0	0	0	0	0
Bacteria	Actinobacteria	Actinobacteria	Corynebacteriales	Dietziaceae	Dietzia	Dietzia_cinnamea	2|201174|1760|85007|85029|37914|321318	0	0	0	0	0	0	0	0	0	0	0	0	0	0	0	0.09775	0	0	0	0	0	0	0	0	0	0	0	0	0	0	0	0	0	0	0	0	0	0	0	0	0	0
Bacteria	Actinobacteria	Actinobacteria	Corynebacteriales	Dietziaceae	Dietzia	Dietzia_maris	2|201174|1760|85007|85029|37914|37915	0	0	0	0	0	0	0	0	0	0	0	0	0	0	0	0.03135	0	0	0	0	0	0	0	0	0	0	0	0	0	0	0	0	0	0	0	0	0	0	0	0	0	0
Bacteria	Actinobacteria	Actinobacteria	Corynebacteriales	Dietziaceae	Dietzia	Dietzia_natronolimnaea	2|201174|1760|85007|85029|37914|161920	0	0	0	0	0	0	0	0	0	0	0	0	0	0	0	0	0	0	0	0	0	0	0	0	0	0	0	0	0	0	0	0	0	0	0	0	0	0	0	0	0	0
Bacteria	Actinobacteria	Actinobacteria	Corynebacteriales	Dietziaceae	Dietzia	Dietzia_psychralcaliphila	2|201174|1760|85007|85029|37914|139021	0	0	0	0	0	0	0	0	0	0	0	0	0	0	0	0	0	0	0	0	0	0	0	0	0	0	0	0	0	0	0	0	0	0	0	0	0	0	0	0	0	0
Bacteria	Actinobacteria	Actinobacteria	Corynebacteriales	Gordoniaceae			2|201174|1760|85007|85026	0	0	0	0	0	0	0	0	0	0	0	0	0.03727	1.59596	0.70229	0.11632	0	0	0	0	0	0	0	0	0	0	0	0	0	0	0	0	0	0	0	0	0	0	0	0	0	0
Bacteria	Actinobacteria	Actinobacteria	Corynebacteriales	Gordoniaceae	Gordonia		2|201174|1760|85007|85026|2053	0	0	0	0	0	0	0	0	0	0	0	0	0.03727	1.59596	0.70229	0.11632	0	0	0	0	0	0	0	0	0	0	0	0	0	0	0	0	0	0	0	0	0	0	0	0	0	0
Bacteria	Actinobacteria	Actinobacteria	Corynebacteriales	Gordoniaceae	Gordonia	Gordonia_alkanivorans	2|201174|1760|85007|85026|2053|84096	0	0	0	0	0	0	0	0	0	0	0	0	0	1.59596	0.70229	0.10541	0	0	0	0	0	0	0	0	0	0	0	0	0	0	0	0	0	0	0	0	0	0	0	0	0	0
Bacteria	Actinobacteria	Actinobacteria	Corynebacteriales	Gordoniaceae	Gordonia	Gordonia_neofelifaecis	2|201174|1760|85007|85026|2053|945692	0	0	0	0	0	0	0	0	0	0	0	0	0	0	0	0	0	0	0	0	0	0	0	0	0	0	0	0	0	0	0	0	0	0	0	0	0	0	0	0	0	0
Bacteria	Actinobacteria	Actinobacteria	Corynebacteriales	Gordoniaceae	Gordonia	Gordonia_terrae	2|201174|1760|85007|85026|2053|2055	0	0	0	0	0	0	0	0	0	0	0	0	0.03727	0	0	0.01091	0	0	0	0	0	0	0	0	0	0	0	0	0	0	0	0	0	0	0	0	0	0	0	0	0	0
Bacteria	Actinobacteria	Actinobacteria	Corynebacteriales	Mycobacteriaceae			2|201174|1760|85007|1762	0	0	0	0	0	0	0	0	0	0	0	0	0.59618	7.49233	1.34634	0.77442	0	0	0	0	0	0	0	0	0	0	0	0	0	0	0	0	0	0	0	0	0	0	0	0	0	0
Bacteria	Actinobacteria	Actinobacteria	Corynebacteriales	Mycobacteriaceae	Mycobacterium		2|201174|1760|85007|1762|1763	0	0	0	0	0	0	0	0	0	0	0	0	0	0.56773	0	0.02793	0	0	0	0	0	0	0	0	0	0	0	0	0	0	0	0	0	0	0	0	0	0	0	0	0	0
Bacteria	Actinobacteria	Actinobacteria	Corynebacteriales	Mycobacteriaceae	Mycobacterium	Mycobacterium_lehmannii	2|201174|1760|85007|1762|1763|2048550	0	0	0	0	0	0	0	0	0	0	0	0	0	0	0	0	0	0	0	0	0	0	0	0	0	0	0	0	0	0	0	0	0	0	0	0	0	0	0	0	0	0
Bacteria	Actinobacteria	Actinobacteria	Corynebacteriales	Mycobacteriaceae	Mycobacterium	Mycobacterium_lepraemurium	2|201174|1760|85007|1762|1763|64667	0	0	0	0	0	0	0	0	0	0	0	0	0	0	0	0	0	0	0	0	0	0	0	0	0	0	0	0	0	0	0	0	0	0	0	0	0	0	0	0	0	0
Bacteria	Actinobacteria	Actinobacteria	Corynebacteriales	Mycobacteriaceae	Mycobacterium	Mycobacterium_sp_1165178_9	2|201174|1760|85007|1762|1763|1834070	0	0	0	0	0	0	0	0	0	0	0	0	0	0	0	0	0	0	0	0	0	0	0	0	0	0	0	0	0	0	0	0	0	0	0	0	0	0	0	0	0	0
Bacteria	Actinobacteria	Actinobacteria	Corynebacteriales	Mycobacteriaceae	Mycobacterium	Mycobacterium_sp_1245111_1	2|201174|1760|85007|1762|1763|1834073	0	0	0	0	0	0	0	0	0	0	0	0	0	0	0	0	0	0	0	0	0	0	0	0	0	0	0	0	0	0	0	0	0	0	0	0	0	0	0	0	0	0
Bacteria	Actinobacteria	Actinobacteria	Corynebacteriales	Mycobacteriaceae	Mycobacterium	Mycobacterium_sp_852002_10029_SCH5224772	2|201174|1760|85007|1762|1763|1834083	0	0	0	0	0	0	0	0	0	0	0	0	0	0	0	0	0	0	0	0	0	0	0	0	0	0	0	0	0	0	0	0	0	0	0	0	0	0	0	0	0	0
Bacteria	Actinobacteria	Actinobacteria	Corynebacteriales	Mycobacteriaceae	Mycobacterium	Mycobacterium_sp_852013_51886_SCH5428379	2|201174|1760|85007|1762|1763|1834111	0	0	0	0	0	0	0	0	0	0	0	0	0	0.56773	0	0.02793	0	0	0	0	0	0	0	0	0	0	0	0	0	0	0	0	0	0	0	0	0	0	0	0	0	0
Bacteria	Actinobacteria	Actinobacteria	Corynebacteriales	Mycobacteriaceae	Mycobacterium	Mycobacterium_sp_ACS1612	2|201174|1760|85007|1762|1763|1834117	0	0	0	0	0	0	0	0	0	0	0	0	0	0	0	0	0	0	0	0	0	0	0	0	0	0	0	0	0	0	0	0	0	0	0	0	0	0	0	0	0	0
Bacteria	Actinobacteria	Actinobacteria	Corynebacteriales	Mycobacteriaceae	Mycobacterium	Mycobacterium_sp_IS_1590	2|201174|1760|85007|1762|1763|1772286	0	0	0	0	0	0	0	0	0	0	0	0	0	0	0	0	0	0	0	0	0	0	0	0	0	0	0	0	0	0	0	0	0	0	0	0	0	0	0	0	0	0
Bacteria	Actinobacteria	Actinobacteria	Corynebacteriales	Mycobacteriaceae	Mycobacterium	Mycobacterium_sp_Root265	2|201174|1760|85007|1762|1763|1736504	0	0	0	0	0	0	0	0	0	0	0	0	0	0	0	0	0	0	0	0	0	0	0	0	0	0	0	0	0	0	0	0	0	0	0	0	0	0	0	0	0	0
Bacteria	Actinobacteria	Actinobacteria	Corynebacteriales	Mycobacteriaceae	Mycolicibacillus		2|201174|1760|85007|1762|2126281	0	0	0	0	0	0	0	0	0	0	0	0	0	0	0	0	0	0	0	0	0	0	0	0	0	0	0	0	0	0	0	0	0	0	0	0	0	0	0	0	0	0
Bacteria	Actinobacteria	Actinobacteria	Corynebacteriales	Mycobacteriaceae	Mycolicibacillus	Mycolicibacillus_koreensis	2|201174|1760|85007|1762|2126281|1069220	0	0	0	0	0	0	0	0	0	0	0	0	0	0	0	0	0	0	0	0	0	0	0	0	0	0	0	0	0	0	0	0	0	0	0	0	0	0	0	0	0	0
Bacteria	Actinobacteria	Actinobacteria	Corynebacteriales	Mycobacteriaceae	Mycolicibacillus	Mycolicibacillus_trivialis	2|201174|1760|85007|1762|2126281|1798	0	0	0	0	0	0	0	0	0	0	0	0	0	0	0	0	0	0	0	0	0	0	0	0	0	0	0	0	0	0	0	0	0	0	0	0	0	0	0	0	0	0
Bacteria	Actinobacteria	Actinobacteria	Corynebacteriales	Mycobacteriaceae	Mycolicibacter		2|201174|1760|85007|1762|1073531	0	0	0	0	0	0	0	0	0	0	0	0	0	0	0	0.057	0	0	0	0	0	0	0	0	0	0	0	0	0	0	0	0	0	0	0	0	0	0	0	0	0	0
Bacteria	Actinobacteria	Actinobacteria	Corynebacteriales	Mycobacteriaceae	Mycolicibacterium		2|201174|1760|85007|1762|1866885	0	0	0	0	0	0	0	0	0	0	0	0	0.59618	6.9246	1.34634	0.68948	0	0	0	0	0	0	0	0	0	0	0	0	0	0	0	0	0	0	0	0	0	0	0	0	0	0
Bacteria	Actinobacteria	Actinobacteria	Corynebacteriales	Mycobacteriaceae	Mycolicibacterium	Mycolicibacterium_acapulense	2|201174|1760|85007|1762|1866885|114977	0	0	0	0	0	0	0	0	0	0	0	0	0	0	0	0	0	0	0	0	0	0	0	0	0	0	0	0	0	0	0	0	0	0	0	0	0	0	0	0	0	0
Bacteria	Actinobacteria	Actinobacteria	Corynebacteriales	Mycobacteriaceae	Mycolicibacterium	Mycolicibacterium_bacteremicum	2|201174|1760|85007|1762|1866885|564198	0	0	0	0	0	0	0	0	0	0	0	0	0.068	0.1929	0	0	0	0	0	0	0	0	0	0	0	0	0	0	0	0	0	0	0	0	0	0	0	0	0	0	0	0
Bacteria	Actinobacteria	Actinobacteria	Corynebacteriales	Mycobacteriaceae	Mycolicibacterium	Mycolicibacterium_duvalii	2|201174|1760|85007|1762|1866885|39688	0	0	0	0	0	0	0	0	0	0	0	0	0	0.05688	0	0	0	0	0	0	0	0	0	0	0	0	0	0	0	0	0	0	0	0	0	0	0	0	0	0	0	0
Bacteria	Actinobacteria	Actinobacteria	Corynebacteriales	Mycobacteriaceae	Mycolicibacterium	Mycolicibacterium_elephantis	2|201174|1760|85007|1762|1866885|81858	0	0	0	0	0	0	0	0	0	0	0	0	0	0	0	0	0	0	0	0	0	0	0	0	0	0	0	0	0	0	0	0	0	0	0	0	0	0	0	0	0	0
Bacteria	Actinobacteria	Actinobacteria	Corynebacteriales	Mycobacteriaceae	Mycolicibacterium	Mycolicibacterium_flavescens	2|201174|1760|85007|1762|1866885|1776	0	0	0	0	0	0	0	0	0	0	0	0	0	0	0	0	0	0	0	0	0	0	0	0	0	0	0	0	0	0	0	0	0	0	0	0	0	0	0	0	0	0
Bacteria	Actinobacteria	Actinobacteria	Corynebacteriales	Mycobacteriaceae	Mycolicibacterium	Mycolicibacterium_fortuitum	2|201174|1760|85007|1762|1866885|1766	0	0	0	0	0	0	0	0	0	0	0	0	0	0	0	0	0	0	0	0	0	0	0	0	0	0	0	0	0	0	0	0	0	0	0	0	0	0	0	0	0	0
Bacteria	Actinobacteria	Actinobacteria	Corynebacteriales	Mycobacteriaceae	Mycolicibacterium	Mycolicibacterium_gilvum	2|201174|1760|85007|1762|1866885|1804	0	0	0	0	0	0	0	0	0	0	0	0	0.47674	4.62067	1.19837	0.48402	0	0	0	0	0	0	0	0	0	0	0	0	0	0	0	0	0	0	0	0	0	0	0	0	0	0
Bacteria	Actinobacteria	Actinobacteria	Corynebacteriales	Mycobacteriaceae	Mycolicibacterium	Mycolicibacterium_holsaticum	2|201174|1760|85007|1762|1866885|152142	0	0	0	0	0	0	0	0	0	0	0	0	0	0	0	0.05322	0	0	0	0	0	0	0	0	0	0	0	0	0	0	0	0	0	0	0	0	0	0	0	0	0	0
Bacteria	Actinobacteria	Actinobacteria	Corynebacteriales	Mycobacteriaceae	Mycolicibacterium	Mycolicibacterium_monacense	2|201174|1760|85007|1762|1866885|85693	0	0	0	0	0	0	0	0	0	0	0	0	0	1.76999	0.14797	0.10358	0	0	0	0	0	0	0	0	0	0	0	0	0	0	0	0	0	0	0	0	0	0	0	0	0	0
Bacteria	Actinobacteria	Actinobacteria	Corynebacteriales	Mycobacteriaceae	Mycolicibacterium	Mycolicibacterium_novocastrense	2|201174|1760|85007|1762|1866885|59813	0	0	0	0	0	0	0	0	0	0	0	0	0	0	0	0	0	0	0	0	0	0	0	0	0	0	0	0	0	0	0	0	0	0	0	0	0	0	0	0	0	0
Bacteria	Actinobacteria	Actinobacteria	Corynebacteriales	Mycobacteriaceae	Mycolicibacterium	Mycolicibacterium_peregrinum	2|201174|1760|85007|1762|1866885|43304	0	0	0	0	0	0	0	0	0	0	0	0	0.05144	0	0	0.04867	0	0	0	0	0	0	0	0	0	0	0	0	0	0	0	0	0	0	0	0	0	0	0	0	0	0
Bacteria	Actinobacteria	Actinobacteria	Corynebacteriales	Mycobacteriaceae	Mycolicibacterium	Mycolicibacterium_sp_GF69	2|201174|1760|85007|1762|1866885|2267251	0	0	0	0	0	0	0	0	0	0	0	0	0	0	0	0	0	0	0	0	0	0	0	0	0	0	0	0	0	0	0	0	0	0	0	0	0	0	0	0	0	0
Bacteria	Actinobacteria	Actinobacteria	Corynebacteriales	Mycobacteriaceae	Mycolicibacterium	Mycolicibacterium_tokaiense	2|201174|1760|85007|1762|1866885|39695	0	0	0	0	0	0	0	0	0	0	0	0	0	0.28417	0	0	0	0	0	0	0	0	0	0	0	0	0	0	0	0	0	0	0	0	0	0	0	0	0	0	0	0
Bacteria	Actinobacteria	Actinobacteria	Corynebacteriales	Mycobacteriaceae	Mycolicibacterium	Mycolicibacterium_tusciae	2|201174|1760|85007|1762|1866885|75922	0	0	0	0	0	0	0	0	0	0	0	0	0	0	0	0	0	0	0	0	0	0	0	0	0	0	0	0	0	0	0	0	0	0	0	0	0	0	0	0	0	0
Bacteria	Actinobacteria	Actinobacteria	Corynebacteriales	Mycobacteriaceae	Mycolicibacter	Mycolicibacter_heraklionensis	2|201174|1760|85007|1762|1073531|512402	0	0	0	0	0	0	0	0	0	0	0	0	0	0	0	0	0	0	0	0	0	0	0	0	0	0	0	0	0	0	0	0	0	0	0	0	0	0	0	0	0	0
Bacteria	Actinobacteria	Actinobacteria	Corynebacteriales	Mycobacteriaceae	Mycolicibacter	Mycolicibacter_kumamotonensis	2|201174|1760|85007|1762|1073531|354243	0	0	0	0	0	0	0	0	0	0	0	0	0	0	0	0.01833	0	0	0	0	0	0	0	0	0	0	0	0	0	0	0	0	0	0	0	0	0	0	0	0	0	0
Bacteria	Actinobacteria	Actinobacteria	Corynebacteriales	Mycobacteriaceae	Mycolicibacter	Mycolicibacter_senuensis	2|201174|1760|85007|1762|1073531|386913	0	0	0	0	0	0	0	0	0	0	0	0	0	0	0	0.03181	0	0	0	0	0	0	0	0	0	0	0	0	0	0	0	0	0	0	0	0	0	0	0	0	0	0
Bacteria	Actinobacteria	Actinobacteria	Corynebacteriales	Mycobacteriaceae	Mycolicibacter	Mycolicibacter_sinensis	2|201174|1760|85007|1762|1073531|875328	0	0	0	0	0	0	0	0	0	0	0	0	0	0	0	0	0	0	0	0	0	0	0	0	0	0	0	0	0	0	0	0	0	0	0	0	0	0	0	0	0	0
Bacteria	Actinobacteria	Actinobacteria	Corynebacteriales	Mycobacteriaceae	Mycolicibacter	Mycolicibacter_terrae	2|201174|1760|85007|1762|1073531|1788	0	0	0	0	0	0	0	0	0	0	0	0	0	0	0	0.00687	0	0	0	0	0	0	0	0	0	0	0	0	0	0	0	0	0	0	0	0	0	0	0	0	0	0
Bacteria	Actinobacteria	Actinobacteria	Corynebacteriales	Nocardiaceae			2|201174|1760|85007|85025	0	0	0	0	0	0	0	0	0	0	0	0	0.11802	1.56469	0.10283	3.60693	0	0	0	0	0	0	0	0	0	0	0	0	0	0	0	0	0	0	0	0	0	0	0	0.25785	6.5241	6.93013
Bacteria	Actinobacteria	Actinobacteria	Corynebacteriales	Nocardiaceae	Nocardia		2|201174|1760|85007|85025|1817	0	0	0	0	0	0	0	0	0	0	0	0	0.05993	0	0	0	0	0	0	0	0	0	0	0	0	0	0	0	0	0	0	0	0	0	0	0	0	0	0	0	0	0
Bacteria	Actinobacteria	Actinobacteria	Corynebacteriales	Nocardiaceae	Nocardia	Nocardia_asteroides	2|201174|1760|85007|85025|1817|1824	0	0	0	0	0	0	0	0	0	0	0	0	0.05993	0	0	0	0	0	0	0	0	0	0	0	0	0	0	0	0	0	0	0	0	0	0	0	0	0	0	0	0	0
Bacteria	Actinobacteria	Actinobacteria	Corynebacteriales	Nocardiaceae	Rhodococcus		2|201174|1760|85007|85025|1827	0	0	0	0	0	0	0	0	0	0	0	0	0.05809	1.56469	0.10283	3.60693	0	0	0	0	0	0	0	0	0	0	0	0	0	0	0	0	0	0	0	0	0	0	0	0.25785	6.5241	6.93013
Bacteria	Actinobacteria	Actinobacteria	Corynebacteriales	Nocardiaceae	Rhodococcus	Rhodococcus_aetherivorans	2|201174|1760|85007|85025|1827|191292	0	0	0	0	0	0	0	0	0	0	0	0	0	0	0	0.03385	0	0	0	0	0	0	0	0	0	0	0	0	0	0	0	0	0	0	0	0	0	0	0	0	0	0
Bacteria	Actinobacteria	Actinobacteria	Corynebacteriales	Nocardiaceae	Rhodococcus	Rhodococcus_biphenylivorans	2|201174|1760|85007|85025|1827|1500843	0	0	0	0	0	0	0	0	0	0	0	0	0	0	0	0.08352	0	0	0	0	0	0	0	0	0	0	0	0	0	0	0	0	0	0	0	0	0	0	0	0	0	0
Bacteria	Actinobacteria	Actinobacteria	Corynebacteriales	Nocardiaceae	Rhodococcus	Rhodococcus_enclensis	2|201174|1760|85007|85025|1827|1049584	0	0	0	0	0	0	0	0	0	0	0	0	0	0	0	0	0	0	0	0	0	0	0	0	0	0	0	0	0	0	0	0	0	0	0	0	0	0	0	0	0	0.17
Bacteria	Actinobacteria	Actinobacteria	Corynebacteriales	Nocardiaceae	Rhodococcus	Rhodococcus_erythropolis	2|201174|1760|85007|85025|1827|1833	0	0	0	0	0	0	0	0	0	0	0	0	0	0	0	0	0	0	0	0	0	0	0	0	0	0	0	0	0	0	0	0	0	0	0	0	0	0	0	0.25785	4.87786	5.05972
Bacteria	Actinobacteria	Actinobacteria	Corynebacteriales	Nocardiaceae	Rhodococcus	Rhodococcus_fascians	2|201174|1760|85007|85025|1827|1828	0	0	0	0	0	0	0	0	0	0	0	0	0	0	0	0	0	0	0	0	0	0	0	0	0	0	0	0	0	0	0	0	0	0	0	0	0	0	0	0	0	0
Bacteria	Actinobacteria	Actinobacteria	Corynebacteriales	Nocardiaceae	Rhodococcus	Rhodococcus_gordoniae	2|201174|1760|85007|85025|1827|223392	0	0	0	0	0	0	0	0	0	0	0	0	0	0	0	0.04995	0	0	0	0	0	0	0	0	0	0	0	0	0	0	0	0	0	0	0	0	0	0	0	0	0	0
Bacteria	Actinobacteria	Actinobacteria	Corynebacteriales	Nocardiaceae	Rhodococcus	Rhodococcus_hoagii	2|201174|1760|85007|85025|1827|43767	0	0	0	0	0	0	0	0	0	0	0	0	0	0	0	0	0	0	0	0	0	0	0	0	0	0	0	0	0	0	0	0	0	0	0	0	0	0	0	0	0	0
Bacteria	Actinobacteria	Actinobacteria	Corynebacteriales	Nocardiaceae	Rhodococcus	Rhodococcus_pyridinivorans	2|201174|1760|85007|85025|1827|103816	0	0	0	0	0	0	0	0	0	0	0	0	0.05809	0.51405	0.10283	3.43962	0	0	0	0	0	0	0	0	0	0	0	0	0	0	0	0	0	0	0	0	0	0	0	0	0	0
Bacteria	Actinobacteria	Actinobacteria	Corynebacteriales	Nocardiaceae	Rhodococcus	Rhodococcus_qingshengii	2|201174|1760|85007|85025|1827|334542	0	0	0	0	0	0	0	0	0	0	0	0	0	0	0	0	0	0	0	0	0	0	0	0	0	0	0	0	0	0	0	0	0	0	0	0	0	0	0	0	1.64624	1.70042
Bacteria	Actinobacteria	Actinobacteria	Corynebacteriales	Nocardiaceae	Rhodococcus	Rhodococcus_ruber	2|201174|1760|85007|85025|1827|1830	0	0	0	0	0	0	0	0	0	0	0	0	0	1.05064	0	0	0	0	0	0	0	0	0	0	0	0	0	0	0	0	0	0	0	0	0	0	0	0	0	0	0	0
Bacteria	Actinobacteria	Actinobacteria	Corynebacteriales	Tsukamurellaceae			2|201174|1760|85007|85028	0	0	0	0	0	0	0	0	0	0	0	0	0	0	0	0	0	0	0	0	0	0	0	0	0	0	0	0	0	0	0	0	0	0	0	0	0	0	0	0	0	0
Bacteria	Actinobacteria	Actinobacteria	Corynebacteriales	Tsukamurellaceae	Tsukamurella		2|201174|1760|85007|85028|2060	0	0	0	0	0	0	0	0	0	0	0	0	0	0	0	0	0	0	0	0	0	0	0	0	0	0	0	0	0	0	0	0	0	0	0	0	0	0	0	0	0	0
Bacteria	Actinobacteria	Actinobacteria	Corynebacteriales	Tsukamurellaceae	Tsukamurella	Tsukamurella_pulmonis	2|201174|1760|85007|85028|2060|47312	0	0	0	0	0	0	0	0	0	0	0	0	0	0	0	0	0	0	0	0	0	0	0	0	0	0	0	0	0	0	0	0	0	0	0	0	0	0	0	0	0	0
Bacteria	Actinobacteria	Actinobacteria	Corynebacteriales	Williamsiaceae			2|201174|1760|85007|182102	0	0	0	0	0	0	0	0	0	0	0	0	0	0.05629	0	0	0	0	0	0	0	0	0	0	0	0	0	0	0	0	0	0	0	0	0	0	0	0	0	0	0	0
Bacteria	Actinobacteria	Actinobacteria	Corynebacteriales	Williamsiaceae	Williamsia		2|201174|1760|85007|182102|85043	0	0	0	0	0	0	0	0	0	0	0	0	0	0.05629	0	0	0	0	0	0	0	0	0	0	0	0	0	0	0	0	0	0	0	0	0	0	0	0	0	0	0	0
Bacteria	Actinobacteria	Actinobacteria	Corynebacteriales	Williamsiaceae	Williamsia	Williamsia_marianensis	2|201174|1760|85007|182102|85043|322609	0	0	0	0	0	0	0	0	0	0	0	0	0	0	0	0	0	0	0	0	0	0	0	0	0	0	0	0	0	0	0	0	0	0	0	0	0	0	0	0	0	0
Bacteria	Actinobacteria	Actinobacteria	Corynebacteriales	Williamsiaceae	Williamsia	Williamsia_sp_1138	2|201174|1760|85007|182102|85043|1903117	0	0	0	0	0	0	0	0	0	0	0	0	0	0.05629	0	0	0	0	0	0	0	0	0	0	0	0	0	0	0	0	0	0	0	0	0	0	0	0	0	0	0	0
Bacteria	Actinobacteria	Actinobacteria	Frankiales				2|201174|1760|85013	0	0	0	0	0	0	0	0	0	0	0	0	0	0.02031	0	0	0	0	0	0	0	0	0	0	0	0	0	0	0	0	0	0	0	0	0	0	0	0	0	0	0	0
Bacteria	Actinobacteria	Actinobacteria	Frankiales	Cryptosporangiaceae			2|201174|1760|85013|622454	0	0	0	0	0	0	0	0	0	0	0	0	0	0.02031	0	0	0	0	0	0	0	0	0	0	0	0	0	0	0	0	0	0	0	0	0	0	0	0	0	0	0	0
Bacteria	Actinobacteria	Actinobacteria	Frankiales	Cryptosporangiaceae	Cryptosporangium		2|201174|1760|85013|622454|65502	0	0	0	0	0	0	0	0	0	0	0	0	0	0.02031	0	0	0	0	0	0	0	0	0	0	0	0	0	0	0	0	0	0	0	0	0	0	0	0	0	0	0	0
Bacteria	Actinobacteria	Actinobacteria	Frankiales	Cryptosporangiaceae	Cryptosporangium	Cryptosporangium_arvum	2|201174|1760|85013|622454|65502|80871	0	0	0	0	0	0	0	0	0	0	0	0	0	0.02031	0	0	0	0	0	0	0	0	0	0	0	0	0	0	0	0	0	0	0	0	0	0	0	0	0	0	0	0
Bacteria	Actinobacteria	Actinobacteria	Geodermatophilales				2|201174|1760|1643682	0	0	0	0	0	0	0	0	0	0	0	0	0	0.86072	0	0	0	0	0	0	0	0	0	0	0	0	0	0	0	0	0	0	0	0	0	0	0	0	0	0	0	0
Bacteria	Actinobacteria	Actinobacteria	Geodermatophilales	Geodermatophilaceae			2|201174|1760|1643682|85030	0	0	0	0	0	0	0	0	0	0	0	0	0	0.86072	0	0	0	0	0	0	0	0	0	0	0	0	0	0	0	0	0	0	0	0	0	0	0	0	0	0	0	0
Bacteria	Actinobacteria	Actinobacteria	Geodermatophilales	Geodermatophilaceae	Blastococcus		2|201174|1760|1643682|85030|38501	0	0	0	0	0	0	0	0	0	0	0	0	0	0.23935	0	0	0	0	0	0	0	0	0	0	0	0	0	0	0	0	0	0	0	0	0	0	0	0	0	0	0	0
Bacteria	Actinobacteria	Actinobacteria	Geodermatophilales	Geodermatophilaceae	Blastococcus	Blastococcus_aggregatus	2|201174|1760|1643682|85030|38501|38502	0	0	0	0	0	0	0	0	0	0	0	0	0	0.18637	0	0	0	0	0	0	0	0	0	0	0	0	0	0	0	0	0	0	0	0	0	0	0	0	0	0	0	0
Bacteria	Actinobacteria	Actinobacteria	Geodermatophilales	Geodermatophilaceae	Blastococcus	Blastococcus_sp_DSM_44205	2|201174|1760|1643682|85030|38501|1550233	0	0	0	0	0	0	0	0	0	0	0	0	0	0.04184	0	0	0	0	0	0	0	0	0	0	0	0	0	0	0	0	0	0	0	0	0	0	0	0	0	0	0	0
Bacteria	Actinobacteria	Actinobacteria	Geodermatophilales	Geodermatophilaceae	Blastococcus	Blastococcus_sp_DSM_46838	2|201174|1760|1643682|85030|38501|1798228	0	0	0	0	0	0	0	0	0	0	0	0	0	0.01113	0	0	0	0	0	0	0	0	0	0	0	0	0	0	0	0	0	0	0	0	0	0	0	0	0	0	0	0
Bacteria	Actinobacteria	Actinobacteria	Geodermatophilales	Geodermatophilaceae	Geodermatophilus		2|201174|1760|1643682|85030|1860	0	0	0	0	0	0	0	0	0	0	0	0	0	0.19455	0	0	0	0	0	0	0	0	0	0	0	0	0	0	0	0	0	0	0	0	0	0	0	0	0	0	0	0
Bacteria	Actinobacteria	Actinobacteria	Geodermatophilales	Geodermatophilaceae	Geodermatophilus	Geodermatophilus_obscurus	2|201174|1760|1643682|85030|1860|1861	0	0	0	0	0	0	0	0	0	0	0	0	0	0	0	0	0	0	0	0	0	0	0	0	0	0	0	0	0	0	0	0	0	0	0	0	0	0	0	0	0	0
Bacteria	Actinobacteria	Actinobacteria	Geodermatophilales	Geodermatophilaceae	Geodermatophilus	Geodermatophilus_sp_DSM_45219	2|201174|1760|1643682|85030|1860|1881103	0	0	0	0	0	0	0	0	0	0	0	0	0	0.19455	0	0	0	0	0	0	0	0	0	0	0	0	0	0	0	0	0	0	0	0	0	0	0	0	0	0	0	0
Bacteria	Actinobacteria	Actinobacteria	Geodermatophilales	Geodermatophilaceae	Klenkia		2|201174|1760|1643682|85030|2183612	0	0	0	0	0	0	0	0	0	0	0	0	0	0.42682	0	0	0	0	0	0	0	0	0	0	0	0	0	0	0	0	0	0	0	0	0	0	0	0	0	0	0	0
Bacteria	Actinobacteria	Actinobacteria	Geodermatophilales	Geodermatophilaceae	Klenkia	Klenkia_taihuensis	2|201174|1760|1643682|85030|2183612|1225127	0	0	0	0	0	0	0	0	0	0	0	0	0	0.42682	0	0	0	0	0	0	0	0	0	0	0	0	0	0	0	0	0	0	0	0	0	0	0	0	0	0	0	0
Bacteria	Actinobacteria	Actinobacteria	Geodermatophilales	Geodermatophilaceae	Modestobacter		2|201174|1760|1643682|85030|88138	0	0	0	0	0	0	0	0	0	0	0	0	0	0	0	0	0	0	0	0	0	0	0	0	0	0	0	0	0	0	0	0	0	0	0	0	0	0	0	0	0	0
Bacteria	Actinobacteria	Actinobacteria	Geodermatophilales	Geodermatophilaceae	Modestobacter	Modestobacter_marinus	2|201174|1760|1643682|85030|88138|477641	0	0	0	0	0	0	0	0	0	0	0	0	0	0	0	0	0	0	0	0	0	0	0	0	0	0	0	0	0	0	0	0	0	0	0	0	0	0	0	0	0	0
Bacteria	Actinobacteria	Actinobacteria	Micrococcales				2|201174|1760|85006	0	0	0.00089	0	0.00528	0.0805	0.00865	0.02256	0.08589	0.00355	0.0044	0.15668	0.93843	27.82987	8.28701	9.38248	0	0	0	0	0	4.67362	0	1.55774	0.00154	0	0	0	0	0.04197	0.16393	0.00383	0.0561	0.00232	0.32337	0.32373	0	0.03248	0	0	0	0
Bacteria	Actinobacteria	Actinobacteria	Micrococcales	Bogoriellaceae			2|201174|1760|85006|145358	0	0	0	0	0	0	0	0	0	0	0	0	0	0	0	0.01551	0	0	0	0	0	0	0	0	0	0	0	0	0	0	0	0	0	0	0	0	0	0	0	0	0	0
Bacteria	Actinobacteria	Actinobacteria	Micrococcales	Bogoriellaceae	Georgenia		2|201174|1760|85006|145358|154116	0	0	0	0	0	0	0	0	0	0	0	0	0	0	0	0.01551	0	0	0	0	0	0	0	0	0	0	0	0	0	0	0	0	0	0	0	0	0	0	0	0	0	0
Bacteria	Actinobacteria	Actinobacteria	Micrococcales	Bogoriellaceae	Georgenia	Georgenia_satyanarayanai	2|201174|1760|85006|145358|154116|860221	0	0	0	0	0	0	0	0	0	0	0	0	0	0	0	0.01551	0	0	0	0	0	0	0	0	0	0	0	0	0	0	0	0	0	0	0	0	0	0	0	0	0	0
Bacteria	Actinobacteria	Actinobacteria	Micrococcales	Brevibacteriaceae			2|201174|1760|85006|85019	0	0	0	0	0	0.00115	0	0	0.00269	0	0	0	0	0	0	0.33139	0	0	0	0	0	4.35586	0	0	0	0	0	0	0	0.01237	0.12078	0.00342	0.00542	0	0.0215	0.09162	0	0	0	0	0	0
Bacteria	Actinobacteria	Actinobacteria	Micrococcales	Brevibacteriaceae	Brevibacterium		2|201174|1760|85006|85019|1696	0	0	0	0	0	0.00115	0	0	0.00269	0	0	0	0	0	0	0.33139	0	0	0	0	0	4.35586	0	0	0	0	0	0	0	0.01237	0.12078	0.00342	0.00542	0	0.0215	0.09162	0	0	0	0	0	0
Bacteria	Actinobacteria	Actinobacteria	Micrococcales	Brevibacteriaceae	Brevibacterium	Brevibacterium_aurantiacum	2|201174|1760|85006|85019|1696|273384	0	0	0	0	0	0	0	0	0	0	0	0	0	0	0	0	0	0	0	0	0	0	0	0	0	0	0	0	0	0	0	0	0	0	0	0	0	0	0	0	0	0
Bacteria	Actinobacteria	Actinobacteria	Micrococcales	Brevibacteriaceae	Brevibacterium	Brevibacterium_casei	2|201174|1760|85006|85019|1696|33889	0	0	0	0	0	0	0	0	0	0	0	0	0	0	0	0	0	0	0	0	0	0	0	0	0	0	0	0	0	0	0	0	0	0	0	0	0	0	0	0	0	0
Bacteria	Actinobacteria	Actinobacteria	Micrococcales	Brevibacteriaceae	Brevibacterium	Brevibacterium_celere	2|201174|1760|85006|85019|1696|225845	0	0	0	0	0	0	0	0	0	0	0	0	0	0	0	0	0	0	0	0	0	0	0	0	0	0	0	0	0	0	0	0	0	0	0	0	0	0	0	0	0	0
Bacteria	Actinobacteria	Actinobacteria	Micrococcales	Brevibacteriaceae	Brevibacterium	Brevibacterium_iodinum	2|201174|1760|85006|85019|1696|31943	0	0	0	0	0	0.00115	0	0	0.00269	0	0	0	0	0	0	0.02995	0	0	0	0	0	0	0	0	0	0	0	0	0	0	0	0	0	0	0.00468	0.00126	0	0	0	0	0	0
Bacteria	Actinobacteria	Actinobacteria	Micrococcales	Brevibacteriaceae	Brevibacterium	Brevibacterium_linens	2|201174|1760|85006|85019|1696|1703	0	0	0	0	0	0	0	0	0	0	0	0	0	0	0	0	0	0	0	0	0	4.35586	0	0	0	0	0	0	0	0	0	0	0	0	0	0	0	0	0	0	0	0
Bacteria	Actinobacteria	Actinobacteria	Micrococcales	Brevibacteriaceae	Brevibacterium	Brevibacterium_luteolum	2|201174|1760|85006|85019|1696|199591	0	0	0	0	0	0	0	0	0	0	0	0	0	0	0	0.28837	0	0	0	0	0	0	0	0	0	0	0	0	0	0.01237	0.12078	0.00342	0.00542	0	0.01646	0.09037	0	0	0	0	0	0
Bacteria	Actinobacteria	Actinobacteria	Micrococcales	Brevibacteriaceae	Brevibacterium	Brevibacterium_sanguinis	2|201174|1760|85006|85019|1696|232444	0	0	0	0	0	0	0	0	0	0	0	0	0	0	0	0	0	0	0	0	0	0	0	0	0	0	0	0	0	0	0	0	0	0	0	0	0	0	0	0	0	0
Bacteria	Actinobacteria	Actinobacteria	Micrococcales	Brevibacteriaceae	Brevibacterium	Brevibacterium_siliguriense	2|201174|1760|85006|85019|1696|1136497	0	0	0	0	0	0	0	0	0	0	0	0	0	0	0	0.01307	0	0	0	0	0	0	0	0	0	0	0	0	0	0	0	0	0	0	0.00036	0	0	0	0	0	0	0
Bacteria	Actinobacteria	Actinobacteria	Micrococcales	Cellulomonadaceae			2|201174|1760|85006|85016	0	0	0	0	0	0	0	0	0	0	0	0	0.36832	0.70948	0	0.00908	0	0	0	0	0	0	0	0	0	0	0	0	0	0	0	0	0	0	0	0	0	0	0	0	0	0
Bacteria	Actinobacteria	Actinobacteria	Micrococcales	Cellulomonadaceae	Cellulomonas		2|201174|1760|85006|85016|1707	0	0	0	0	0	0	0	0	0	0	0	0	0.36832	0.70948	0	0.00908	0	0	0	0	0	0	0	0	0	0	0	0	0	0	0	0	0	0	0	0	0	0	0	0	0	0
Bacteria	Actinobacteria	Actinobacteria	Micrococcales	Cellulomonadaceae	Cellulomonas	Cellulomonas_carbonis	2|201174|1760|85006|85016|1707|1386092	0	0	0	0	0	0	0	0	0	0	0	0	0	0.02023	0	0	0	0	0	0	0	0	0	0	0	0	0	0	0	0	0	0	0	0	0	0	0	0	0	0	0	0
Bacteria	Actinobacteria	Actinobacteria	Micrococcales	Cellulomonadaceae	Cellulomonas	Cellulomonas_cellasea	2|201174|1760|85006|85016|1707|43670	0	0	0	0	0	0	0	0	0	0	0	0	0.36832	0.31376	0	0	0	0	0	0	0	0	0	0	0	0	0	0	0	0	0	0	0	0	0	0	0	0	0	0	0	0
Bacteria	Actinobacteria	Actinobacteria	Micrococcales	Cellulomonadaceae	Cellulomonas	Cellulomonas_fimi	2|201174|1760|85006|85016|1707|1708	0	0	0	0	0	0	0	0	0	0	0	0	0	0	0	0	0	0	0	0	0	0	0	0	0	0	0	0	0	0	0	0	0	0	0	0	0	0	0	0	0	0
Bacteria	Actinobacteria	Actinobacteria	Micrococcales	Cellulomonadaceae	Cellulomonas	Cellulomonas_gilvus	2|201174|1760|85006|85016|1707|11	0	0	0	0	0	0	0	0	0	0	0	0	0	0.37549	0	0	0	0	0	0	0	0	0	0	0	0	0	0	0	0	0	0	0	0	0	0	0	0	0	0	0	0
Bacteria	Actinobacteria	Actinobacteria	Micrococcales	Cellulomonadaceae	Cellulomonas	Cellulomonas_sp_B6	2|201174|1760|85006|85016|1707|1295626	0	0	0	0	0	0	0	0	0	0	0	0	0	0	0	0	0	0	0	0	0	0	0	0	0	0	0	0	0	0	0	0	0	0	0	0	0	0	0	0	0	0
Bacteria	Actinobacteria	Actinobacteria	Micrococcales	Cellulomonadaceae	Cellulomonas	Cellulomonas_sp_PSBB021	2|201174|1760|85006|85016|1707|2003551	0	0	0	0	0	0	0	0	0	0	0	0	0	0	0	0.00908	0	0	0	0	0	0	0	0	0	0	0	0	0	0	0	0	0	0	0	0	0	0	0	0	0	0
Bacteria	Actinobacteria	Actinobacteria	Micrococcales	Cellulomonadaceae	Oerskovia		2|201174|1760|85006|85016|162491	0	0	0	0	0	0	0	0	0	0	0	0	0	0	0	0	0	0	0	0	0	0	0	0	0	0	0	0	0	0	0	0	0	0	0	0	0	0	0	0	0	0
Bacteria	Actinobacteria	Actinobacteria	Micrococcales	Cellulomonadaceae	Oerskovia	Oerskovia_enterophila	2|201174|1760|85006|85016|162491|43678	0	0	0	0	0	0	0	0	0	0	0	0	0	0	0	0	0	0	0	0	0	0	0	0	0	0	0	0	0	0	0	0	0	0	0	0	0	0	0	0	0	0
Bacteria	Actinobacteria	Actinobacteria	Micrococcales	Dermabacteraceae			2|201174|1760|85006|85020	0	0	0	0	0	0.06821	0.00532	0.0159	0.07392	0.00239	0	0	0	0	0	6.73529	0	0	0	0	0	0	0	0	0.00154	0	0	0	0	0.01303	0.00175	0	0.05001	0	0.2815	0.15025	0	0.0304	0	0	0	0
Bacteria	Actinobacteria	Actinobacteria	Micrococcales	Dermabacteraceae	Brachybacterium		2|201174|1760|85006|85020|43668	0	0	0	0	0	0.06821	0.00532	0.0159	0.07392	0.00239	0	0	0	0	0	6.73529	0	0	0	0	0	0	0	0	0.00154	0	0	0	0	0.01303	0.00175	0	0.05001	0	0.2815	0.15025	0	0.0304	0	0	0	0
Bacteria	Actinobacteria	Actinobacteria	Micrococcales	Dermabacteraceae	Brachybacterium	Brachybacterium_faecium	2|201174|1760|85006|85020|43668|43669	0	0	0	0	0	0.06821	0.00532	0.0159	0.07392	0.00239	0	0	0	0	0	6.73529	0	0	0	0	0	0	0	0	0.00154	0	0	0	0	0.01303	0.00175	0	0.05001	0	0.2815	0.15025	0	0.0304	0	0	0	0
Bacteria	Actinobacteria	Actinobacteria	Micrococcales	Dermabacteraceae	Brachybacterium	Brachybacterium_muris	2|201174|1760|85006|85020|43668|219301	0	0	0	0	0	0	0	0	0	0	0	0	0	0	0	0	0	0	0	0	0	0	0	0	0	0	0	0	0	0	0	0	0	0	0	0	0	0	0	0	0	0
Bacteria	Actinobacteria	Actinobacteria	Micrococcales	Dermabacteraceae	Brachybacterium	Brachybacterium_nesterenkovii	2|201174|1760|85006|85020|43668|47847	0	0	0	0	0	0	0	0	0	0	0	0	0	0	0	0	0	0	0	0	0	0	0	0	0	0	0	0	0	0	0	0	0	0	0	0	0	0	0	0	0	0
Bacteria	Actinobacteria	Actinobacteria	Micrococcales	Dermabacteraceae	Brachybacterium	Brachybacterium_sp_P6_10_X1	2|201174|1760|85006|85020|43668|1903186	0	0	0	0	0	0	0	0	0	0	0	0	0	0	0	0	0	0	0	0	0	0	0	0	0	0	0	0	0	0	0	0	0	0	0	0	0	0	0	0	0	0
Bacteria	Actinobacteria	Actinobacteria	Micrococcales	Dermabacteraceae	Brachybacterium	Brachybacterium_sp_VM2412	2|201174|1760|85006|85020|43668|2017484	0	0	0	0	0	0	0	0	0	0	0	0	0	0	0	0	0	0	0	0	0	0	0	0	0	0	0	0	0	0	0	0	0	0	0	0	0	0	0	0	0	0
Bacteria	Actinobacteria	Actinobacteria	Micrococcales	Dermacoccaceae			2|201174|1760|85006|145357	0	0	0	0	0	0	0	0	0	0	0	0	0	0	0	0	0	0	0	0	0	0	0	0	0	0	0	0	0	0	0	0	0	0	0	0	0	0	0	0	0	0
Bacteria	Actinobacteria	Actinobacteria	Micrococcales	Dermacoccaceae	Dermacoccus		2|201174|1760|85006|145357|57495	0	0	0	0	0	0	0	0	0	0	0	0	0	0	0	0	0	0	0	0	0	0	0	0	0	0	0	0	0	0	0	0	0	0	0	0	0	0	0	0	0	0
Bacteria	Actinobacteria	Actinobacteria	Micrococcales	Dermacoccaceae	Dermacoccus	Dermacoccus_nishinomiyaensis	2|201174|1760|85006|145357|57495|1274	0	0	0	0	0	0	0	0	0	0	0	0	0	0	0	0	0	0	0	0	0	0	0	0	0	0	0	0	0	0	0	0	0	0	0	0	0	0	0	0	0	0
Bacteria	Actinobacteria	Actinobacteria	Micrococcales	Dermatophilaceae			2|201174|1760|85006|85018	0	0	0	0	0	0	0	0	0	0	0	0	0	0	0	0	0	0	0	0	0	0	0	0	0	0	0	0	0	0	0	0	0	0	0	0	0	0	0	0	0	0
Bacteria	Actinobacteria	Actinobacteria	Micrococcales	Dermatophilaceae	Mobilicoccus		2|201174|1760|85006|85018|984996	0	0	0	0	0	0	0	0	0	0	0	0	0	0	0	0	0	0	0	0	0	0	0	0	0	0	0	0	0	0	0	0	0	0	0	0	0	0	0	0	0	0
Bacteria	Actinobacteria	Actinobacteria	Micrococcales	Dermatophilaceae	Mobilicoccus	Mobilicoccus_pelagius	2|201174|1760|85006|85018|984996|746032	0	0	0	0	0	0	0	0	0	0	0	0	0	0	0	0	0	0	0	0	0	0	0	0	0	0	0	0	0	0	0	0	0	0	0	0	0	0	0	0	0	0
Bacteria	Actinobacteria	Actinobacteria	Micrococcales	Intrasporangiaceae			2|201174|1760|85006|85021	0	0	0	0	0	0	0	0	0	0	0	0	0.08927	1.0402	0	0.07845	0	0	0	0	0	0	0	0	0	0	0	0	0	0	0	0	0	0	0	0	0	0	0	0	0	0
Bacteria	Actinobacteria	Actinobacteria	Micrococcales	Intrasporangiaceae	Intrasporangium		2|201174|1760|85006|85021|53357	0	0	0	0	0	0	0	0	0	0	0	0	0	0	0	0	0	0	0	0	0	0	0	0	0	0	0	0	0	0	0	0	0	0	0	0	0	0	0	0	0	0
Bacteria	Actinobacteria	Actinobacteria	Micrococcales	Intrasporangiaceae	Intrasporangium	Intrasporangium_calvum	2|201174|1760|85006|85021|53357|53358	0	0	0	0	0	0	0	0	0	0	0	0	0	0	0	0	0	0	0	0	0	0	0	0	0	0	0	0	0	0	0	0	0	0	0	0	0	0	0	0	0	0
Bacteria	Actinobacteria	Actinobacteria	Micrococcales	Intrasporangiaceae	Janibacter		2|201174|1760|85006|85021|53457	0	0	0	0	0	0	0	0	0	0	0	0	0.08927	0.79897	0	0.07845	0	0	0	0	0	0	0	0	0	0	0	0	0	0	0	0	0	0	0	0	0	0	0	0	0	0
Bacteria	Actinobacteria	Actinobacteria	Micrococcales	Intrasporangiaceae	Janibacter	Janibacter_hoylei	2|201174|1760|85006|85021|53457|364298	0	0	0	0	0	0	0	0	0	0	0	0	0	0	0	0	0	0	0	0	0	0	0	0	0	0	0	0	0	0	0	0	0	0	0	0	0	0	0	0	0	0
Bacteria	Actinobacteria	Actinobacteria	Micrococcales	Intrasporangiaceae	Janibacter	Janibacter_indicus	2|201174|1760|85006|85021|53457|857417	0	0	0	0	0	0	0	0	0	0	0	0	0	0	0	0	0	0	0	0	0	0	0	0	0	0	0	0	0	0	0	0	0	0	0	0	0	0	0	0	0	0
Bacteria	Actinobacteria	Actinobacteria	Micrococcales	Intrasporangiaceae	Janibacter	Janibacter_melonis	2|201174|1760|85006|85021|53457|262209	0	0	0	0	0	0	0	0	0	0	0	0	0.08927	0.79897	0	0.07845	0	0	0	0	0	0	0	0	0	0	0	0	0	0	0	0	0	0	0	0	0	0	0	0	0	0
Bacteria	Actinobacteria	Actinobacteria	Micrococcales	Intrasporangiaceae	Janibacter	Janibacter_terrae	2|201174|1760|85006|85021|53457|103817	0	0	0	0	0	0	0	0	0	0	0	0	0	0	0	0	0	0	0	0	0	0	0	0	0	0	0	0	0	0	0	0	0	0	0	0	0	0	0	0	0	0
Bacteria	Actinobacteria	Actinobacteria	Micrococcales	Intrasporangiaceae	Knoellia		2|201174|1760|85006|85021|136099	0	0	0	0	0	0	0	0	0	0	0	0	0	0.03554	0	0	0	0	0	0	0	0	0	0	0	0	0	0	0	0	0	0	0	0	0	0	0	0	0	0	0	0
Bacteria	Actinobacteria	Actinobacteria	Micrococcales	Intrasporangiaceae	Knoellia	Knoellia_aerolata	2|201174|1760|85006|85021|136099|442954	0	0	0	0	0	0	0	0	0	0	0	0	0	0.03554	0	0	0	0	0	0	0	0	0	0	0	0	0	0	0	0	0	0	0	0	0	0	0	0	0	0	0	0
Bacteria	Actinobacteria	Actinobacteria	Micrococcales	Intrasporangiaceae	Knoellia	Knoellia_flava	2|201174|1760|85006|85021|136099|913969	0	0	0	0	0	0	0	0	0	0	0	0	0	0	0	0	0	0	0	0	0	0	0	0	0	0	0	0	0	0	0	0	0	0	0	0	0	0	0	0	0	0
Bacteria	Actinobacteria	Actinobacteria	Micrococcales	Intrasporangiaceae	Ornithinimicrobium		2|201174|1760|85006|85021|125287	0	0	0	0	0	0	0	0	0	0	0	0	0	0.20568	0	0	0	0	0	0	0	0	0	0	0	0	0	0	0	0	0	0	0	0	0	0	0	0	0	0	0	0
Bacteria	Actinobacteria	Actinobacteria	Micrococcales	Intrasporangiaceae	Ornithinimicrobium	Ornithinimicrobium_pekingense	2|201174|1760|85006|85021|125287|384677	0	0	0	0	0	0	0	0	0	0	0	0	0	0.20568	0	0	0	0	0	0	0	0	0	0	0	0	0	0	0	0	0	0	0	0	0	0	0	0	0	0	0	0
Bacteria	Actinobacteria	Actinobacteria	Micrococcales	Intrasporangiaceae	Ornithinimicrobium	Ornithinimicrobium_sp_AMA3305	2|201174|1760|85006|85021|125287|2283195	0	0	0	0	0	0	0	0	0	0	0	0	0	0	0	0	0	0	0	0	0	0	0	0	0	0	0	0	0	0	0	0	0	0	0	0	0	0	0	0	0	0
Bacteria	Actinobacteria	Actinobacteria	Micrococcales	Intrasporangiaceae	Phycicoccus		2|201174|1760|85006|85021|367298	0	0	0	0	0	0	0	0	0	0	0	0	0	0	0	0	0	0	0	0	0	0	0	0	0	0	0	0	0	0	0	0	0	0	0	0	0	0	0	0	0	0
Bacteria	Actinobacteria	Actinobacteria	Micrococcales	Intrasporangiaceae	Phycicoccus	Phycicoccus_cremeus	2|201174|1760|85006|85021|367298|587636	0	0	0	0	0	0	0	0	0	0	0	0	0	0	0	0	0	0	0	0	0	0	0	0	0	0	0	0	0	0	0	0	0	0	0	0	0	0	0	0	0	0
Bacteria	Actinobacteria	Actinobacteria	Micrococcales	Intrasporangiaceae	Terrabacter		2|201174|1760|85006|85021|53355	0	0	0	0	0	0	0	0	0	0	0	0	0	0	0	0	0	0	0	0	0	0	0	0	0	0	0	0	0	0	0	0	0	0	0	0	0	0	0	0	0	0
Bacteria	Actinobacteria	Actinobacteria	Micrococcales	Intrasporangiaceae	Terrabacter	Terrabacter_sp_28	2|201174|1760|85006|85021|53355|1619947	0	0	0	0	0	0	0	0	0	0	0	0	0	0	0	0	0	0	0	0	0	0	0	0	0	0	0	0	0	0	0	0	0	0	0	0	0	0	0	0	0	0
Bacteria	Actinobacteria	Actinobacteria	Micrococcales	Jonesiaceae			2|201174|1760|85006|85022	0	0	0	0	0	0	0	0	0	0	0	0	0	0	0	0	0	0	0	0	0	0	0	0	0	0	0	0	0	0.00704	0	0	0	0	0	0.01601	0	0	0	0	0	0
Bacteria	Actinobacteria	Actinobacteria	Micrococcales	Jonesiaceae	Jonesia		2|201174|1760|85006|85022|43673	0	0	0	0	0	0	0	0	0	0	0	0	0	0	0	0	0	0	0	0	0	0	0	0	0	0	0	0	0	0.00704	0	0	0	0	0	0.01601	0	0	0	0	0	0
Bacteria	Actinobacteria	Actinobacteria	Micrococcales	Jonesiaceae	Jonesia	Jonesia_denitrificans	2|201174|1760|85006|85022|43673|43674	0	0	0	0	0	0	0	0	0	0	0	0	0	0	0	0	0	0	0	0	0	0	0	0	0	0	0	0	0	0.00704	0	0	0	0	0	0.01601	0	0	0	0	0	0
Bacteria	Actinobacteria	Actinobacteria	Micrococcales	Microbacteriaceae			2|201174|1760|85006|85023	0	0	0	0	0	0	0	0	0.0038	0	0	0	0.2795	1.87077	0	0.30819	0	0	0	0	0	0	0	0	0	0	0	0	0	0	0	0	0	0	0	0	0	0	0	0	0	0
Bacteria	Actinobacteria	Actinobacteria	Micrococcales	Microbacteriaceae	Agrococcus		2|201174|1760|85006|85023|46352	0	0	0	0	0	0	0	0	0	0	0	0	0	0	0	0	0	0	0	0	0	0	0	0	0	0	0	0	0	0	0	0	0	0	0	0	0	0	0	0	0	0
Bacteria	Actinobacteria	Actinobacteria	Micrococcales	Microbacteriaceae	Agrococcus	Agrococcus_baldri	2|201174|1760|85006|85023|46352|153730	0	0	0	0	0	0	0	0	0	0	0	0	0	0	0	0	0	0	0	0	0	0	0	0	0	0	0	0	0	0	0	0	0	0	0	0	0	0	0	0	0	0
Bacteria	Actinobacteria	Actinobacteria	Micrococcales	Microbacteriaceae	Agrococcus	Agrococcus_pavilionensis	2|201174|1760|85006|85023|46352|1346502	0	0	0	0	0	0	0	0	0	0	0	0	0	0	0	0	0	0	0	0	0	0	0	0	0	0	0	0	0	0	0	0	0	0	0	0	0	0	0	0	0	0
Bacteria	Actinobacteria	Actinobacteria	Micrococcales	Microbacteriaceae	Agromyces		2|201174|1760|85006|85023|33877	0	0	0	0	0	0	0	0	0	0	0	0	0	0.02377	0	0	0	0	0	0	0	0	0	0	0	0	0	0	0	0	0	0	0	0	0	0	0	0	0	0	0	0
Bacteria	Actinobacteria	Actinobacteria	Micrococcales	Microbacteriaceae	Agromyces	Agromyces_sp_NDB4Y10	2|201174|1760|85006|85023|33877|1775951	0	0	0	0	0	0	0	0	0	0	0	0	0	0.02377	0	0	0	0	0	0	0	0	0	0	0	0	0	0	0	0	0	0	0	0	0	0	0	0	0	0	0	0
Bacteria	Actinobacteria	Actinobacteria	Micrococcales	Microbacteriaceae	Cryobacterium		2|201174|1760|85006|85023|69578	0	0	0	0	0	0	0	0	0	0	0	0	0	0	0	0	0	0	0	0	0	0	0	0	0	0	0	0	0	0	0	0	0	0	0	0	0	0	0	0	0	0
Bacteria	Actinobacteria	Actinobacteria	Micrococcales	Microbacteriaceae	Cryobacterium	Cryobacterium_arcticum	2|201174|1760|85006|85023|69578|670052	0	0	0	0	0	0	0	0	0	0	0	0	0	0	0	0	0	0	0	0	0	0	0	0	0	0	0	0	0	0	0	0	0	0	0	0	0	0	0	0	0	0
Bacteria	Actinobacteria	Actinobacteria	Micrococcales	Microbacteriaceae	Gulosibacter		2|201174|1760|85006|85023|256818	0	0	0	0	0	0	0	0	0	0	0	0	0	0	0	0	0	0	0	0	0	0	0	0	0	0	0	0	0	0	0	0	0	0	0	0	0	0	0	0	0	0
Bacteria	Actinobacteria	Actinobacteria	Micrococcales	Microbacteriaceae	Gulosibacter	Gulosibacter_molinativorax	2|201174|1760|85006|85023|256818|256821	0	0	0	0	0	0	0	0	0	0	0	0	0	0	0	0	0	0	0	0	0	0	0	0	0	0	0	0	0	0	0	0	0	0	0	0	0	0	0	0	0	0
Bacteria	Actinobacteria	Actinobacteria	Micrococcales	Microbacteriaceae	Leucobacter		2|201174|1760|85006|85023|55968	0	0	0	0	0	0	0	0	0	0	0	0	0	0	0	0	0	0	0	0	0	0	0	0	0	0	0	0	0	0	0	0	0	0	0	0	0	0	0	0	0	0
Bacteria	Actinobacteria	Actinobacteria	Micrococcales	Microbacteriaceae	Leucobacter	Leucobacter_komagatae	2|201174|1760|85006|85023|55968|55969	0	0	0	0	0	0	0	0	0	0	0	0	0	0	0	0	0	0	0	0	0	0	0	0	0	0	0	0	0	0	0	0	0	0	0	0	0	0	0	0	0	0
Bacteria	Actinobacteria	Actinobacteria	Micrococcales	Microbacteriaceae	Leucobacter	Leucobacter_massiliensis	2|201174|1760|85006|85023|55968|1686285	0	0	0	0	0	0	0	0	0	0	0	0	0	0	0	0	0	0	0	0	0	0	0	0	0	0	0	0	0	0	0	0	0	0	0	0	0	0	0	0	0	0
Bacteria	Actinobacteria	Actinobacteria	Micrococcales	Microbacteriaceae	Leucobacter	Leucobacter_sp_G161	2|201174|1760|85006|85023|55968|663704	0	0	0	0	0	0	0	0	0	0	0	0	0	0	0	0	0	0	0	0	0	0	0	0	0	0	0	0	0	0	0	0	0	0	0	0	0	0	0	0	0	0
Bacteria	Actinobacteria	Actinobacteria	Micrococcales	Microbacteriaceae	Leucobacter	Leucobacter_sp_UCD_THU	2|201174|1760|85006|85023|55968|1292023	0	0	0	0	0	0	0	0	0	0	0	0	0	0	0	0	0	0	0	0	0	0	0	0	0	0	0	0	0	0	0	0	0	0	0	0	0	0	0	0	0	0
Bacteria	Actinobacteria	Actinobacteria	Micrococcales	Microbacteriaceae	Microbacterium		2|201174|1760|85006|85023|33882	0	0	0	0	0	0	0	0	0.0038	0	0	0	0.2795	1.847	0	0.30819	0	0	0	0	0	0	0	0	0	0	0	0	0	0	0	0	0	0	0	0	0	0	0	0	0	0
Bacteria	Actinobacteria	Actinobacteria	Micrococcales	Microbacteriaceae	Microbacterium	Microbacterium_agarici	2|201174|1760|85006|85023|33882|630514	0	0	0	0	0	0	0	0	0	0	0	0	0	0	0	0	0	0	0	0	0	0	0	0	0	0	0	0	0	0	0	0	0	0	0	0	0	0	0	0	0	0
Bacteria	Actinobacteria	Actinobacteria	Micrococcales	Microbacteriaceae	Microbacterium	Microbacterium_chocolatum	2|201174|1760|85006|85023|33882|84292	0	0	0	0	0	0	0	0	0	0	0	0	0	0.14208	0	0	0	0	0	0	0	0	0	0	0	0	0	0	0	0	0	0	0	0	0	0	0	0	0	0	0	0
Bacteria	Actinobacteria	Actinobacteria	Micrococcales	Microbacteriaceae	Microbacterium	Microbacterium_laevaniformans	2|201174|1760|85006|85023|33882|36807	0	0	0	0	0	0	0	0	0	0	0	0	0	0	0	0	0	0	0	0	0	0	0	0	0	0	0	0	0	0	0	0	0	0	0	0	0	0	0	0	0	0
Bacteria	Actinobacteria	Actinobacteria	Micrococcales	Microbacteriaceae	Microbacterium	Microbacterium_maritypicum	2|201174|1760|85006|85023|33882|300020	0	0	0	0	0	0	0	0	0	0	0	0	0	0	0	0	0	0	0	0	0	0	0	0	0	0	0	0	0	0	0	0	0	0	0	0	0	0	0	0	0	0
Bacteria	Actinobacteria	Actinobacteria	Micrococcales	Microbacteriaceae	Microbacterium	Microbacterium_oxydans	2|201174|1760|85006|85023|33882|82380	0	0	0	0	0	0	0	0	0	0	0	0	0	0	0	0	0	0	0	0	0	0	0	0	0	0	0	0	0	0	0	0	0	0	0	0	0	0	0	0	0	0
Bacteria	Actinobacteria	Actinobacteria	Micrococcales	Microbacteriaceae	Microbacterium	Microbacterium_paraoxydans	2|201174|1760|85006|85023|33882|199592	0	0	0	0	0	0	0	0	0	0	0	0	0	0	0	0	0	0	0	0	0	0	0	0	0	0	0	0	0	0	0	0	0	0	0	0	0	0	0	0	0	0
Bacteria	Actinobacteria	Actinobacteria	Micrococcales	Microbacteriaceae	Microbacterium	Microbacterium_sorbitolivorans	2|201174|1760|85006|85023|33882|1867410	0	0	0	0	0	0	0	0	0	0	0	0	0	0	0	0	0	0	0	0	0	0	0	0	0	0	0	0	0	0	0	0	0	0	0	0	0	0	0	0	0	0
Bacteria	Actinobacteria	Actinobacteria	Micrococcales	Microbacteriaceae	Microbacterium	Microbacterium_sp_AR7_10	2|201174|1760|85006|85023|33882|1891970	0	0	0	0	0	0	0	0	0.0038	0	0	0	0	0.2626	0	0.02887	0	0	0	0	0	0	0	0	0	0	0	0	0	0	0	0	0	0	0	0	0	0	0	0	0	0
Bacteria	Actinobacteria	Actinobacteria	Micrococcales	Microbacteriaceae	Microbacterium	Microbacterium_sp_H83	2|201174|1760|85006|85023|33882|1827324	0	0	0	0	0	0	0	0	0	0	0	0	0	0	0	0	0	0	0	0	0	0	0	0	0	0	0	0	0	0	0	0	0	0	0	0	0	0	0	0	0	0
Bacteria	Actinobacteria	Actinobacteria	Micrococcales	Microbacteriaceae	Microbacterium	Microbacterium_sp_HM58_2	2|201174|1760|85006|85023|33882|1778770	0	0	0	0	0	0	0	0	0	0	0	0	0	0	0	0	0	0	0	0	0	0	0	0	0	0	0	0	0	0	0	0	0	0	0	0	0	0	0	0	0	0
Bacteria	Actinobacteria	Actinobacteria	Micrococcales	Microbacteriaceae	Microbacterium	Microbacterium_sp_LKL04	2|201174|1760|85006|85023|33882|912630	0	0	0	0	0	0	0	0	0	0	0	0	0.2795	1.44231	0	0.27932	0	0	0	0	0	0	0	0	0	0	0	0	0	0	0	0	0	0	0	0	0	0	0	0	0	0
Bacteria	Actinobacteria	Actinobacteria	Micrococcales	Microbacteriaceae	Microbacterium	Microbacterium_sp_MYb45	2|201174|1760|85006|85023|33882|1827294	0	0	0	0	0	0	0	0	0	0	0	0	0	0	0	0	0	0	0	0	0	0	0	0	0	0	0	0	0	0	0	0	0	0	0	0	0	0	0	0	0	0
Bacteria	Actinobacteria	Actinobacteria	Micrococcales	Microbacteriaceae	Microbacterium	Microbacterium_sp_MYb62	2|201174|1760|85006|85023|33882|1848690	0	0	0	0	0	0	0	0	0	0	0	0	0	0	0	0	0	0	0	0	0	0	0	0	0	0	0	0	0	0	0	0	0	0	0	0	0	0	0	0	0	0
Bacteria	Actinobacteria	Actinobacteria	Micrococcales	Microbacteriaceae	Microbacterium	Microbacterium_sp_MYb72	2|201174|1760|85006|85023|33882|1848693	0	0	0	0	0	0	0	0	0	0	0	0	0	0	0	0	0	0	0	0	0	0	0	0	0	0	0	0	0	0	0	0	0	0	0	0	0	0	0	0	0	0
Bacteria	Actinobacteria	Actinobacteria	Micrococcales	Microbacteriaceae	Microbacterium	Microbacterium_sp_NEAU_LLE	2|201174|1760|85006|85023|33882|2293570	0	0	0	0	0	0	0	0	0	0	0	0	0	0	0	0	0	0	0	0	0	0	0	0	0	0	0	0	0	0	0	0	0	0	0	0	0	0	0	0	0	0
Bacteria	Actinobacteria	Actinobacteria	Micrococcales	Microbacteriaceae	Microbacterium	Microbacterium_sp_TPD7012	2|201174|1760|85006|85023|33882|2171975	0	0	0	0	0	0	0	0	0	0	0	0	0	0	0	0	0	0	0	0	0	0	0	0	0	0	0	0	0	0	0	0	0	0	0	0	0	0	0	0	0	0
Bacteria	Actinobacteria	Actinobacteria	Micrococcales	Microbacteriaceae	Plantibacter		2|201174|1760|85006|85023|190323	0	0	0	0	0	0	0	0	0	0	0	0	0	0	0	0	0	0	0	0	0	0	0	0	0	0	0	0	0	0	0	0	0	0	0	0	0	0	0	0	0	0
Bacteria	Actinobacteria	Actinobacteria	Micrococcales	Microbacteriaceae	Plantibacter	Plantibacter_flavus	2|201174|1760|85006|85023|190323|150123	0	0	0	0	0	0	0	0	0	0	0	0	0	0	0	0	0	0	0	0	0	0	0	0	0	0	0	0	0	0	0	0	0	0	0	0	0	0	0	0	0	0
Bacteria	Actinobacteria	Actinobacteria	Micrococcales	Microbacteriaceae	Pseudoclavibacter		2|201174|1760|85006|85023|255204	0	0	0	0	0	0	0	0	0	0	0	0	0	0	0	0	0	0	0	0	0	0	0	0	0	0	0	0	0	0	0	0	0	0	0	0	0	0	0	0	0	0
Bacteria	Actinobacteria	Actinobacteria	Micrococcales	Microbacteriaceae	Pseudoclavibacter	Pseudoclavibacter_sp_AY1F1	2|201174|1760|85006|85023|255204|2080583	0	0	0	0	0	0	0	0	0	0	0	0	0	0	0	0	0	0	0	0	0	0	0	0	0	0	0	0	0	0	0	0	0	0	0	0	0	0	0	0	0	0
Bacteria	Actinobacteria	Actinobacteria	Micrococcales	Micrococcaceae			2|201174|1760|85006|1268	0	0	0.00089	0	0.00528	0.01114	0.00333	0.00666	0.00548	0.00116	0.0044	0.15668	0	23.04038	8.28701	0.21566	0	0	0	0	0	0.31777	0	1.55774	0	0	0	0	0	0.00952	0.04139	0.00042	0.00067	0.00232	0.02037	0.06585	0	0.00208	0	0	0	0
Bacteria	Actinobacteria	Actinobacteria	Micrococcales	Micrococcaceae	Arthrobacter		2|201174|1760|85006|1268|1663	0	0	0	0	0	0	0	0	0	0	0	0	0	0.26956	0	0	0	0	0	0	0	0	0	0	0	0	0	0	0	0	0	0	0	0	0	0	0	0	0	0	0	0
Bacteria	Actinobacteria	Actinobacteria	Micrococcales	Micrococcaceae	Arthrobacter	Arthrobacter_alpinus	2|201174|1760|85006|1268|1663|656366	0	0	0	0	0	0	0	0	0	0	0	0	0	0	0	0	0	0	0	0	0	0	0	0	0	0	0	0	0	0	0	0	0	0	0	0	0	0	0	0	0	0
Bacteria	Actinobacteria	Actinobacteria	Micrococcales	Micrococcaceae	Arthrobacter	Arthrobacter_crystallopoietes	2|201174|1760|85006|1268|1663|37928	0	0	0	0	0	0	0	0	0	0	0	0	0	0	0	0	0	0	0	0	0	0	0	0	0	0	0	0	0	0	0	0	0	0	0	0	0	0	0	0	0	0
Bacteria	Actinobacteria	Actinobacteria	Micrococcales	Micrococcaceae	Arthrobacter	Arthrobacter_globiformis	2|201174|1760|85006|1268|1663|1665	0	0	0	0	0	0	0	0	0	0	0	0	0	0	0	0	0	0	0	0	0	0	0	0	0	0	0	0	0	0	0	0	0	0	0	0	0	0	0	0	0	0
Bacteria	Actinobacteria	Actinobacteria	Micrococcales	Micrococcaceae	Arthrobacter	Arthrobacter_sp_49Tsu3_1M3	2|201174|1760|85006|1268|1663|1279029	0	0	0	0	0	0	0	0	0	0	0	0	0	0	0	0	0	0	0	0	0	0	0	0	0	0	0	0	0	0	0	0	0	0	0	0	0	0	0	0	0	0
Bacteria	Actinobacteria	Actinobacteria	Micrococcales	Micrococcaceae	Arthrobacter	Arthrobacter_sp_AFG7_2	2|201174|1760|85006|1268|1663|1688693	0	0	0	0	0	0	0	0	0	0	0	0	0	0	0	0	0	0	0	0	0	0	0	0	0	0	0	0	0	0	0	0	0	0	0	0	0	0	0	0	0	0
Bacteria	Actinobacteria	Actinobacteria	Micrococcales	Micrococcaceae	Arthrobacter	Arthrobacter_sp_Leaf69	2|201174|1760|85006|1268|1663|1736232	0	0	0	0	0	0	0	0	0	0	0	0	0	0	0	0	0	0	0	0	0	0	0	0	0	0	0	0	0	0	0	0	0	0	0	0	0	0	0	0	0	0
Bacteria	Actinobacteria	Actinobacteria	Micrococcales	Micrococcaceae	Arthrobacter	Arthrobacter_sp_OY3WO11	2|201174|1760|85006|1268|1663|1835723	0	0	0	0	0	0	0	0	0	0	0	0	0	0	0	0	0	0	0	0	0	0	0	0	0	0	0	0	0	0	0	0	0	0	0	0	0	0	0	0	0	0
Bacteria	Actinobacteria	Actinobacteria	Micrococcales	Micrococcaceae	Arthrobacter	Arthrobacter_sp_PGP41	2|201174|1760|85006|1268|1663|2079227	0	0	0	0	0	0	0	0	0	0	0	0	0	0	0	0	0	0	0	0	0	0	0	0	0	0	0	0	0	0	0	0	0	0	0	0	0	0	0	0	0	0
Bacteria	Actinobacteria	Actinobacteria	Micrococcales	Micrococcaceae	Arthrobacter	Arthrobacter_sp_Soil782	2|201174|1760|85006|1268|1663|1736410	0	0	0	0	0	0	0	0	0	0	0	0	0	0	0	0	0	0	0	0	0	0	0	0	0	0	0	0	0	0	0	0	0	0	0	0	0	0	0	0	0	0
Bacteria	Actinobacteria	Actinobacteria	Micrococcales	Micrococcaceae	Arthrobacter	Arthrobacter_subterraneus	2|201174|1760|85006|1268|1663|335973	0	0	0	0	0	0	0	0	0	0	0	0	0	0.26956	0	0	0	0	0	0	0	0	0	0	0	0	0	0	0	0	0	0	0	0	0	0	0	0	0	0	0	0
Bacteria	Actinobacteria	Actinobacteria	Micrococcales	Micrococcaceae	Citricoccus		2|201174|1760|85006|1268|169133	0	0	0	0	0	0	0	0	0	0	0	0	0	0	0	0	0	0	0	0	0	0	0	0	0	0	0	0	0	0	0	0	0	0	0	0	0	0	0	0	0	0
Bacteria	Actinobacteria	Actinobacteria	Micrococcales	Micrococcaceae	Citricoccus	Citricoccus_muralis	2|201174|1760|85006|1268|169133|169134	0	0	0	0	0	0	0	0	0	0	0	0	0	0	0	0	0	0	0	0	0	0	0	0	0	0	0	0	0	0	0	0	0	0	0	0	0	0	0	0	0	0
Bacteria	Actinobacteria	Actinobacteria	Micrococcales	Micrococcaceae	Enteractinococcus		2|201174|1760|85006|1268|1164863	0	0	0	0	0	0.0016	0	0	0.00379	0	0	0	0	0	0	0.01945	0	0	0	0	0	0	0	0	0	0	0	0	0	0.00952	0.04139	0.00042	0.00019	0	0.02037	0.06585	0	0.00208	0	0	0	0
Bacteria	Actinobacteria	Actinobacteria	Micrococcales	Micrococcaceae	Enteractinococcus	Enteractinococcus_helveticum	2|201174|1760|85006|1268|1164863|1837282	0	0	0	0	0	0.0016	0	0	0.00379	0	0	0	0	0	0	0.01945	0	0	0	0	0	0	0	0	0	0	0	0	0	0.00952	0.04139	0.00042	0.00019	0	0.02037	0.06585	0	0.00208	0	0	0	0
Bacteria	Actinobacteria	Actinobacteria	Micrococcales	Micrococcaceae	Glutamicibacter		2|201174|1760|85006|1268|1742989	0	0	0	0	0	0	0	0	0	0	0	0	0	0	0	0.10382	0	0	0	0	0	0	0	0	0	0	0	0	0	0	0	0	0.00048	0.00069	0	0	0	0	0	0	0	0
Bacteria	Actinobacteria	Actinobacteria	Micrococcales	Micrococcaceae	Glutamicibacter	Glutamicibacter_arilaitensis	2|201174|1760|85006|1268|1742989|256701	0	0	0	0	0	0	0	0	0	0	0	0	0	0	0	0	0	0	0	0	0	0	0	0	0	0	0	0	0	0	0	0	0	0	0	0	0	0	0	0	0	0
Bacteria	Actinobacteria	Actinobacteria	Micrococcales	Micrococcaceae	Glutamicibacter	Glutamicibacter_mysorens	2|201174|1760|85006|1268|1742989|257984	0	0	0	0	0	0	0	0	0	0	0	0	0	0	0	0	0	0	0	0	0	0	0	0	0	0	0	0	0	0	0	0	0.00048	0.00069	0	0	0	0	0	0	0	0
Bacteria	Actinobacteria	Actinobacteria	Micrococcales	Micrococcaceae	Glutamicibacter	Glutamicibacter_soli	2|201174|1760|85006|1268|1742989|453836	0	0	0	0	0	0	0	0	0	0	0	0	0	0	0	0.10382	0	0	0	0	0	0	0	0	0	0	0	0	0	0	0	0	0	0	0	0	0	0	0	0	0	0
Bacteria	Actinobacteria	Actinobacteria	Micrococcales	Micrococcaceae	Glutamicibacter	Glutamicibacter_sp	2|201174|1760|85006|1268|1742989|1931995	0	0	0	0	0	0	0	0	0	0	0	0	0	0	0	0	0	0	0	0	0	0	0	0	0	0	0	0	0	0	0	0	0	0	0	0	0	0	0	0	0	0
Bacteria	Actinobacteria	Actinobacteria	Micrococcales	Micrococcaceae	Glutamicibacter	Glutamicibacter_sp_BW77	2|201174|1760|85006|1268|1742989|2024402	0	0	0	0	0	0	0	0	0	0	0	0	0	0	0	0	0	0	0	0	0	0	0	0	0	0	0	0	0	0	0	0	0	0	0	0	0	0	0	0	0	0
Bacteria	Actinobacteria	Actinobacteria	Micrococcales	Micrococcaceae	Kocuria		2|201174|1760|85006|1268|57493	0	0	0	0	0	0	0	0	0	0	0	0	0	22.77082	8.28701	0.08333	0	0	0	0	0	0	0	0	0	0	0	0	0	0	0	0	0	0	0	0	0	0	0	0	0	0
Bacteria	Actinobacteria	Actinobacteria	Micrococcales	Micrococcaceae	Kocuria	Kocuria_indica	2|201174|1760|85006|1268|57493|1049583	0	0	0	0	0	0	0	0	0	0	0	0	0	0.14594	0	0	0	0	0	0	0	0	0	0	0	0	0	0	0	0	0	0	0	0	0	0	0	0	0	0	0	0
Bacteria	Actinobacteria	Actinobacteria	Micrococcales	Micrococcaceae	Kocuria	Kocuria_marina	2|201174|1760|85006|1268|57493|223184	0	0	0	0	0	0	0	0	0	0	0	0	0	0.04233	0	0	0	0	0	0	0	0	0	0	0	0	0	0	0	0	0	0	0	0	0	0	0	0	0	0	0	0
Bacteria	Actinobacteria	Actinobacteria	Micrococcales	Micrococcaceae	Kocuria	Kocuria_palustris	2|201174|1760|85006|1268|57493|71999	0	0	0	0	0	0	0	0	0	0	0	0	0	0	0	0	0	0	0	0	0	0	0	0	0	0	0	0	0	0	0	0	0	0	0	0	0	0	0	0	0	0
Bacteria	Actinobacteria	Actinobacteria	Micrococcales	Micrococcaceae	Kocuria	Kocuria_polaris	2|201174|1760|85006|1268|57493|136273	0	0	0	0	0	0	0	0	0	0	0	0	0	12.04228	6.30659	0.04905	0	0	0	0	0	0	0	0	0	0	0	0	0	0	0	0	0	0	0	0	0	0	0	0	0	0
Bacteria	Actinobacteria	Actinobacteria	Micrococcales	Micrococcaceae	Kocuria	Kocuria_rhizophila	2|201174|1760|85006|1268|57493|72000	0	0	0	0	0	0	0	0	0	0	0	0	0	0	0	0	0	0	0	0	0	0	0	0	0	0	0	0	0	0	0	0	0	0	0	0	0	0	0	0	0	0
Bacteria	Actinobacteria	Actinobacteria	Micrococcales	Micrococcaceae	Kocuria	Kocuria_rosea	2|201174|1760|85006|1268|57493|1275	0	0	0	0	0	0	0	0	0	0	0	0	0	10.54028	1.98043	0.03428	0	0	0	0	0	0	0	0	0	0	0	0	0	0	0	0	0	0	0	0	0	0	0	0	0	0
Bacteria	Actinobacteria	Actinobacteria	Micrococcales	Micrococcaceae	Kocuria	Kocuria_varians	2|201174|1760|85006|1268|57493|1272	0	0	0	0	0	0	0	0	0	0	0	0	0	0	0	0	0	0	0	0	0	0	0	0	0	0	0	0	0	0	0	0	0	0	0	0	0	0	0	0	0	0
Bacteria	Actinobacteria	Actinobacteria	Micrococcales	Micrococcaceae	Micrococcus		2|201174|1760|85006|1268|1269	0	0	0	0	0	0	0	0	0	0	0	0	0	0	0	0	0	0	0	0	0	0	0	0	0	0	0	0	0	0	0	0	0	0.00163	0	0	0	0	0	0	0	0
Bacteria	Actinobacteria	Actinobacteria	Micrococcales	Micrococcaceae	Micrococcus	Micrococcus_aloeverae	2|201174|1760|85006|1268|1269|1391911	0	0	0	0	0	0	0	0	0	0	0	0	0	0	0	0	0	0	0	0	0	0	0	0	0	0	0	0	0	0	0	0	0	0	0	0	0	0	0	0	0	0
Bacteria	Actinobacteria	Actinobacteria	Micrococcales	Micrococcaceae	Micrococcus	Micrococcus_luteus	2|201174|1760|85006|1268|1269|1270	0	0	0	0	0	0	0	0	0	0	0	0	0	0	0	0	0	0	0	0	0	0	0	0	0	0	0	0	0	0	0	0	0	0	0	0	0	0	0	0	0	0
Bacteria	Actinobacteria	Actinobacteria	Micrococcales	Micrococcaceae	Micrococcus	Micrococcus_terreus	2|201174|1760|85006|1268|1269|574650	0	0	0	0	0	0	0	0	0	0	0	0	0	0	0	0	0	0	0	0	0	0	0	0	0	0	0	0	0	0	0	0	0	0.00163	0	0	0	0	0	0	0	0
Bacteria	Actinobacteria	Actinobacteria	Micrococcales	Micrococcaceae	Nesterenkonia		2|201174|1760|85006|1268|57494	0	0	0	0	0	0	0	0	0	0	0	0	0	0	0	0	0	0	0	0	0	0	0	0	0	0	0	0	0	0	0	0	0	0	0	0	0	0	0	0	0	0
Bacteria	Actinobacteria	Actinobacteria	Micrococcales	Micrococcaceae	Nesterenkonia	Nesterenkonia_jeotgali	2|201174|1760|85006|1268|57494|317018	0	0	0	0	0	0	0	0	0	0	0	0	0	0	0	0	0	0	0	0	0	0	0	0	0	0	0	0	0	0	0	0	0	0	0	0	0	0	0	0	0	0
Bacteria	Actinobacteria	Actinobacteria	Micrococcales	Micrococcaceae	Nesterenkonia	Nesterenkonia_sandarakina	2|201174|1760|85006|1268|57494|272918	0	0	0	0	0	0	0	0	0	0	0	0	0	0	0	0	0	0	0	0	0	0	0	0	0	0	0	0	0	0	0	0	0	0	0	0	0	0	0	0	0	0
Bacteria	Actinobacteria	Actinobacteria	Micrococcales	Micrococcaceae	Paenarthrobacter		2|201174|1760|85006|1268|1742992	0	0	0	0	0	0	0	0	0	0	0	0	0	0	0	0	0	0	0	0	0	0	0	0	0	0	0	0	0	0	0	0	0	0	0	0	0	0	0	0	0	0
Bacteria	Actinobacteria	Actinobacteria	Micrococcales	Micrococcaceae	Paenarthrobacter	Paenarthrobacter_nicotinovorans	2|201174|1760|85006|1268|1742992|29320	0	0	0	0	0	0	0	0	0	0	0	0	0	0	0	0	0	0	0	0	0	0	0	0	0	0	0	0	0	0	0	0	0	0	0	0	0	0	0	0	0	0
Bacteria	Actinobacteria	Actinobacteria	Micrococcales	Micrococcaceae	Pseudarthrobacter		2|201174|1760|85006|1268|1742993	0	0	0	0	0	0	0	0	0	0	0	0	0	0	0	0.00907	0	0	0	0	0	0	0	0	0	0	0	0	0	0	0	0	0	0	0	0	0	0	0	0	0	0
Bacteria	Actinobacteria	Actinobacteria	Micrococcales	Micrococcaceae	Pseudarthrobacter	Pseudarthrobacter_phenanthrenivorans	2|201174|1760|85006|1268|1742993|361575	0	0	0	0	0	0	0	0	0	0	0	0	0	0	0	0.00907	0	0	0	0	0	0	0	0	0	0	0	0	0	0	0	0	0	0	0	0	0	0	0	0	0	0
Bacteria	Actinobacteria	Actinobacteria	Micrococcales	Micrococcaceae	Rothia		2|201174|1760|85006|1268|32207	0	0	0.00089	0	0.00528	0.00954	0.00333	0.00666	0.00169	0.00116	0.0044	0.15668	0	0	0	0	0	0	0	0	0	0.31777	0	1.55774	0	0	0	0	0	0	0	0	0	0	0	0	0	0	0	0	0	0
Bacteria	Actinobacteria	Actinobacteria	Micrococcales	Micrococcaceae	Rothia	Rothia_mucilaginosa	2|201174|1760|85006|1268|32207|43675	0	0	0	0	0	0	0	0	0	0	0	0	0	0	0	0	0	0	0	0	0	0	0	0	0	0	0	0	0	0	0	0	0	0	0	0	0	0	0	0	0	0
Bacteria	Actinobacteria	Actinobacteria	Micrococcales	Micrococcaceae	Rothia	Rothia_sp	2|201174|1760|85006|1268|32207|1885016	0	0	0.00089	0	0.00528	0.00954	0.00333	0.00666	0.00169	0.00116	0.0044	0.15668	0	0	0	0	0	0	0	0	0	0.31777	0	1.55774	0	0	0	0	0	0	0	0	0	0	0	0	0	0	0	0	0	0
Bacteria	Actinobacteria	Actinobacteria	Micrococcales	Promicromonosporaceae			2|201174|1760|85006|85017	0	0	0	0	0	0	0	0	0	0	0	0	0.20134	0.94975	0	1.66935	0	0	0	0	0	0	0	0	0	0	0	0	0	0	0	0	0	0	0	0	0	0	0	0	0	0
Bacteria	Actinobacteria	Actinobacteria	Micrococcales	Promicromonosporaceae	Cellulosimicrobium		2|201174|1760|85006|85017|157920	0	0	0	0	0	0	0	0	0	0	0	0	0.20134	0.94975	0	1.66935	0	0	0	0	0	0	0	0	0	0	0	0	0	0	0	0	0	0	0	0	0	0	0	0	0	0
Bacteria	Actinobacteria	Actinobacteria	Micrococcales	Promicromonosporaceae	Cellulosimicrobium	Cellulosimicrobium_aquatile	2|201174|1760|85006|85017|157920|1612203	0	0	0	0	0	0	0	0	0	0	0	0	0	0	0	0.01736	0	0	0	0	0	0	0	0	0	0	0	0	0	0	0	0	0	0	0	0	0	0	0	0	0	0
Bacteria	Actinobacteria	Actinobacteria	Micrococcales	Promicromonosporaceae	Cellulosimicrobium	Cellulosimicrobium_cellulans	2|201174|1760|85006|85017|157920|1710	0	0	0	0	0	0	0	0	0	0	0	0	0.20134	0.94975	0	1.61939	0	0	0	0	0	0	0	0	0	0	0	0	0	0	0	0	0	0	0	0	0	0	0	0	0	0
Bacteria	Actinobacteria	Actinobacteria	Micrococcales	Promicromonosporaceae	Cellulosimicrobium	Cellulosimicrobium_funkei	2|201174|1760|85006|85017|157920|264251	0	0	0	0	0	0	0	0	0	0	0	0	0	0	0	0.0326	0	0	0	0	0	0	0	0	0	0	0	0	0	0	0	0	0	0	0	0	0	0	0	0	0	0
Bacteria	Actinobacteria	Actinobacteria	Micrococcales	Promicromonosporaceae	Krasilnikoviella		2|201174|1760|85006|85017|1914244	0	0	0	0	0	0	0	0	0	0	0	0	0	0	0	0	0	0	0	0	0	0	0	0	0	0	0	0	0	0	0	0	0	0	0	0	0	0	0	0	0	0
Bacteria	Actinobacteria	Actinobacteria	Micrococcales	Promicromonosporaceae	Krasilnikoviella	Krasilnikoviella_flava	2|201174|1760|85006|85017|1914244|526729	0	0	0	0	0	0	0	0	0	0	0	0	0	0	0	0	0	0	0	0	0	0	0	0	0	0	0	0	0	0	0	0	0	0	0	0	0	0	0	0	0	0
Bacteria	Actinobacteria	Actinobacteria	Micrococcales	Promicromonosporaceae	Promicromonospora		2|201174|1760|85006|85017|43676	0	0	0	0	0	0	0	0	0	0	0	0	0	0	0	0	0	0	0	0	0	0	0	0	0	0	0	0	0	0	0	0	0	0	0	0	0	0	0	0	0	0
Bacteria	Actinobacteria	Actinobacteria	Micrococcales	Promicromonosporaceae	Promicromonospora	Promicromonospora_sukumoe	2|201174|1760|85006|85017|43676|88382	0	0	0	0	0	0	0	0	0	0	0	0	0	0	0	0	0	0	0	0	0	0	0	0	0	0	0	0	0	0	0	0	0	0	0	0	0	0	0	0	0	0
Bacteria	Actinobacteria	Actinobacteria	Micrococcales	Promicromonosporaceae	Promicromonospora	Promicromonospora_thailandica	2|201174|1760|85006|85017|43676|765201	0	0	0	0	0	0	0	0	0	0	0	0	0	0	0	0	0	0	0	0	0	0	0	0	0	0	0	0	0	0	0	0	0	0	0	0	0	0	0	0	0	0
Bacteria	Actinobacteria	Actinobacteria	Micrococcales	Ruaniaceae			2|201174|1760|85006|1331736	0	0	0	0	0	0	0	0	0	0	0	0	0	0	0	0	0	0	0	0	0	0	0	0	0	0	0	0	0	0	0	0	0	0	0	0	0	0	0	0	0	0
Bacteria	Actinobacteria	Actinobacteria	Micrococcales	Ruaniaceae	Ruaniaceae_unclassified			0	0	0	0	0	0	0	0	0	0	0	0	0	0	0	0	0	0	0	0	0	0	0	0	0	0	0	0	0	0	0	0	0	0	0	0	0	0	0	0	0	0
Bacteria	Actinobacteria	Actinobacteria	Micrococcales	Ruaniaceae	Ruaniaceae_unclassified		2|201174|1760|85006|1331736|	0	0	0	0	0	0	0	0	0	0	0	0	0	0	0	0	0	0	0	0	0	0	0	0	0	0	0	0	0	0	0	0	0	0	0	0	0	0	0	0	0	0
Bacteria	Actinobacteria	Actinobacteria	Micrococcales	Ruaniaceae	Ruaniaceae_unclassified	Ruaniaceae_bacterium_KH17	2|201174|1760|85006|1331736||1945888	0	0	0	0	0	0	0	0	0	0	0	0	0	0	0	0	0	0	0	0	0	0	0	0	0	0	0	0	0	0	0	0	0	0	0	0	0	0	0	0	0	0
Bacteria	Actinobacteria	Actinobacteria	Micrococcales	Sanguibacteraceae			2|201174|1760|85006|145360	0	0	0	0	0	0	0	0	0	0	0	0	0	0.2193	0	0.01955	0	0	0	0	0	0	0	0	0	0	0	0	0	0	0	0	0	0	0	0	0	0	0	0	0	0
Bacteria	Actinobacteria	Actinobacteria	Micrococcales	Sanguibacteraceae	Sanguibacter		2|201174|1760|85006|145360|60919	0	0	0	0	0	0	0	0	0	0	0	0	0	0.2193	0	0.01955	0	0	0	0	0	0	0	0	0	0	0	0	0	0	0	0	0	0	0	0	0	0	0	0	0	0
Bacteria	Actinobacteria	Actinobacteria	Micrococcales	Sanguibacteraceae	Sanguibacter	Sanguibacter_keddieii	2|201174|1760|85006|145360|60919|60920	0	0	0	0	0	0	0	0	0	0	0	0	0	0	0	0	0	0	0	0	0	0	0	0	0	0	0	0	0	0	0	0	0	0	0	0	0	0	0	0	0	0
Bacteria	Actinobacteria	Actinobacteria	Micrococcales	Sanguibacteraceae	Sanguibacter	Sanguibacter_marinus	2|201174|1760|85006|145360|60919|285351	0	0	0	0	0	0	0	0	0	0	0	0	0	0.2193	0	0.00634	0	0	0	0	0	0	0	0	0	0	0	0	0	0	0	0	0	0	0	0	0	0	0	0	0	0
Bacteria	Actinobacteria	Actinobacteria	Micrococcales	Sanguibacteraceae	Sanguibacter	Sanguibacter_soli	2|201174|1760|85006|145360|60919|442709	0	0	0	0	0	0	0	0	0	0	0	0	0	0	0	0.01322	0	0	0	0	0	0	0	0	0	0	0	0	0	0	0	0	0	0	0	0	0	0	0	0	0	0
Bacteria	Actinobacteria	Actinobacteria	Micrococcales	Sanguibacteraceae	Sanguibacter	Sanguibacter_sp_Leaf3	2|201174|1760|85006|145360|60919|1736209	0	0	0	0	0	0	0	0	0	0	0	0	0	0	0	0	0	0	0	0	0	0	0	0	0	0	0	0	0	0	0	0	0	0	0	0	0	0	0	0	0	0
Bacteria	Actinobacteria	Actinobacteria	Micromonosporales				2|201174|1760|85008	0	0	0	0	0	0	0	0	0	0	0	0	0	2.32727	0	0.23847	0	0	0	0	0	0	0	0	0	0	0	0	0	0	0	0	0	0	0	0	0	0	0	0	0	0
Bacteria	Actinobacteria	Actinobacteria	Micromonosporales	Micromonosporaceae			2|201174|1760|85008|28056	0	0	0	0	0	0	0	0	0	0	0	0	0	2.32727	0	0.23847	0	0	0	0	0	0	0	0	0	0	0	0	0	0	0	0	0	0	0	0	0	0	0	0	0	0
Bacteria	Actinobacteria	Actinobacteria	Micromonosporales	Micromonosporaceae	Actinoplanes		2|201174|1760|85008|28056|1865	0	0	0	0	0	0	0	0	0	0	0	0	0	0	0	0	0	0	0	0	0	0	0	0	0	0	0	0	0	0	0	0	0	0	0	0	0	0	0	0	0	0
Bacteria	Actinobacteria	Actinobacteria	Micromonosporales	Micromonosporaceae	Actinoplanes	Actinoplanes_atraurantiacus	2|201174|1760|85008|28056|1865|1036182	0	0	0	0	0	0	0	0	0	0	0	0	0	0	0	0	0	0	0	0	0	0	0	0	0	0	0	0	0	0	0	0	0	0	0	0	0	0	0	0	0	0
Bacteria	Actinobacteria	Actinobacteria	Micromonosporales	Micromonosporaceae	Actinoplanes	Actinoplanes_italicus	2|201174|1760|85008|28056|1865|113567	0	0	0	0	0	0	0	0	0	0	0	0	0	0	0	0	0	0	0	0	0	0	0	0	0	0	0	0	0	0	0	0	0	0	0	0	0	0	0	0	0	0
Bacteria	Actinobacteria	Actinobacteria	Micromonosporales	Micromonosporaceae	Micromonospora		2|201174|1760|85008|28056|1873	0	0	0	0	0	0	0	0	0	0	0	0	0	2.32727	0	0.23847	0	0	0	0	0	0	0	0	0	0	0	0	0	0	0	0	0	0	0	0	0	0	0	0	0	0
Bacteria	Actinobacteria	Actinobacteria	Micromonosporales	Micromonosporaceae	Micromonospora	Micromonospora_aurantiaca	2|201174|1760|85008|28056|1873|47850	0	0	0	0	0	0	0	0	0	0	0	0	0	2.32727	0	0.23847	0	0	0	0	0	0	0	0	0	0	0	0	0	0	0	0	0	0	0	0	0	0	0	0	0	0
Bacteria	Actinobacteria	Actinobacteria	Micromonosporales	Micromonosporaceae	Micromonospora	Micromonospora_avicenniae	2|201174|1760|85008|28056|1873|1198245	0	0	0	0	0	0	0	0	0	0	0	0	0	0	0	0	0	0	0	0	0	0	0	0	0	0	0	0	0	0	0	0	0	0	0	0	0	0	0	0	0	0
Bacteria	Actinobacteria	Actinobacteria	Micromonosporales	Micromonosporaceae	Micromonospora	Micromonospora_echinaurantiaca	2|201174|1760|85008|28056|1873|47857	0	0	0	0	0	0	0	0	0	0	0	0	0	0	0	0	0	0	0	0	0	0	0	0	0	0	0	0	0	0	0	0	0	0	0	0	0	0	0	0	0	0
Bacteria	Actinobacteria	Actinobacteria	Micromonosporales	Micromonosporaceae	Micromonospora	Micromonospora_echinofusca	2|201174|1760|85008|28056|1873|47858	0	0	0	0	0	0	0	0	0	0	0	0	0	0	0	0	0	0	0	0	0	0	0	0	0	0	0	0	0	0	0	0	0	0	0	0	0	0	0	0	0	0
Bacteria	Actinobacteria	Actinobacteria	Micromonosporales	Micromonosporaceae	Micromonospora	Micromonospora_peucetia	2|201174|1760|85008|28056|1873|47871	0	0	0	0	0	0	0	0	0	0	0	0	0	0	0	0	0	0	0	0	0	0	0	0	0	0	0	0	0	0	0	0	0	0	0	0	0	0	0	0	0	0
Bacteria	Actinobacteria	Actinobacteria	Micromonosporales	Micromonosporaceae	Micromonospora	Micromonospora_purpureochromogenes	2|201174|1760|85008|28056|1873|47872	0	0	0	0	0	0	0	0	0	0	0	0	0	0	0	0	0	0	0	0	0	0	0	0	0	0	0	0	0	0	0	0	0	0	0	0	0	0	0	0	0	0
Bacteria	Actinobacteria	Actinobacteria	Micromonosporales	Micromonosporaceae	Micromonospora	Micromonospora_saelicesensis	2|201174|1760|85008|28056|1873|285676	0	0	0	0	0	0	0	0	0	0	0	0	0	0	0	0	0	0	0	0	0	0	0	0	0	0	0	0	0	0	0	0	0	0	0	0	0	0	0	0	0	0
Bacteria	Actinobacteria	Actinobacteria	Micromonosporales	Micromonosporaceae	Pseudosporangium		2|201174|1760|85008|28056|439698	0	0	0	0	0	0	0	0	0	0	0	0	0	0	0	0	0	0	0	0	0	0	0	0	0	0	0	0	0	0	0	0	0	0	0	0	0	0	0	0	0	0
Bacteria	Actinobacteria	Actinobacteria	Micromonosporales	Micromonosporaceae	Pseudosporangium	Pseudosporangium_ferrugineum	2|201174|1760|85008|28056|439698|439699	0	0	0	0	0	0	0	0	0	0	0	0	0	0	0	0	0	0	0	0	0	0	0	0	0	0	0	0	0	0	0	0	0	0	0	0	0	0	0	0	0	0
Bacteria	Actinobacteria	Actinobacteria	Nakamurellales				2|201174|1760|1643684	0	0	0	0	0	0	0	0	0	0	0	0	0	0	0	0	0	0	0	0	0	0	0	0	0	0	0	0	0	0	0	0	0	0	0	0	0	0	0	0	0	0
Bacteria	Actinobacteria	Actinobacteria	Nakamurellales	Nakamurellaceae			2|201174|1760|1643684|85031	0	0	0	0	0	0	0	0	0	0	0	0	0	0	0	0	0	0	0	0	0	0	0	0	0	0	0	0	0	0	0	0	0	0	0	0	0	0	0	0	0	0
Bacteria	Actinobacteria	Actinobacteria	Nakamurellales	Nakamurellaceae	Nakamurella		2|201174|1760|1643684|85031|53460	0	0	0	0	0	0	0	0	0	0	0	0	0	0	0	0	0	0	0	0	0	0	0	0	0	0	0	0	0	0	0	0	0	0	0	0	0	0	0	0	0	0
Bacteria	Actinobacteria	Actinobacteria	Nakamurellales	Nakamurellaceae	Nakamurella	Nakamurella_multipartita	2|201174|1760|1643684|85031|53460|53461	0	0	0	0	0	0	0	0	0	0	0	0	0	0	0	0	0	0	0	0	0	0	0	0	0	0	0	0	0	0	0	0	0	0	0	0	0	0	0	0	0	0
Bacteria	Actinobacteria	Actinobacteria	Propionibacteriales				2|201174|1760|85009	0	0	0	0	0	0.00828	0.00543	0.01569	0.00324	0.00185	0	0	0.01789	0.11296	0	0	0	0	0	0	0	0	0	0	0	0	0	0	0	0	0	0	0	0	0	0	0	0	0	0	0	0
Bacteria	Actinobacteria	Actinobacteria	Propionibacteriales	Nocardioidaceae			2|201174|1760|85009|85015	0	0	0	0	0	0	0	0	0	0	0	0	0.01789	0.07428	0	0	0	0	0	0	0	0	0	0	0	0	0	0	0	0	0	0	0	0	0	0	0	0	0	0	0	0
Bacteria	Actinobacteria	Actinobacteria	Propionibacteriales	Nocardioidaceae	Aeromicrobium		2|201174|1760|85009|85015|2040	0	0	0	0	0	0	0	0	0	0	0	0	0.01789	0.07428	0	0	0	0	0	0	0	0	0	0	0	0	0	0	0	0	0	0	0	0	0	0	0	0	0	0	0	0
Bacteria	Actinobacteria	Actinobacteria	Propionibacteriales	Nocardioidaceae	Aeromicrobium	Aeromicrobium_choanae	2|201174|1760|85009|85015|2040|1736691	0	0	0	0	0	0	0	0	0	0	0	0	0.01789	0.07428	0	0	0	0	0	0	0	0	0	0	0	0	0	0	0	0	0	0	0	0	0	0	0	0	0	0	0	0
Bacteria	Actinobacteria	Actinobacteria	Propionibacteriales	Nocardioidaceae	Aeromicrobium	Aeromicrobium_sp_PE09_221	2|201174|1760|85009|85015|2040|1898043	0	0	0	0	0	0	0	0	0	0	0	0	0	0	0	0	0	0	0	0	0	0	0	0	0	0	0	0	0	0	0	0	0	0	0	0	0	0	0	0	0	0
Bacteria	Actinobacteria	Actinobacteria	Propionibacteriales	Nocardioidaceae	Aeromicrobium	Aeromicrobium_sp_Root236	2|201174|1760|85009|85015|2040|1736498	0	0	0	0	0	0	0	0	0	0	0	0	0	0	0	0	0	0	0	0	0	0	0	0	0	0	0	0	0	0	0	0	0	0	0	0	0	0	0	0	0	0
Bacteria	Actinobacteria	Actinobacteria	Propionibacteriales	Nocardioidaceae	Nocardioidaceae_unclassified		2|201174|1760|85009|85015|	0	0	0	0	0	0	0	0	0	0	0	0	0	0	0	0	0	0	0	0	0	0	0	0	0	0	0	0	0	0	0	0	0	0	0	0	0	0	0	0	0	0
Bacteria	Actinobacteria	Actinobacteria	Propionibacteriales	Nocardioidaceae	Nocardioidaceae_unclassified	Nocardioidaceae_bacterium_Broad_1	2|201174|1760|85009|85015||408672	0	0	0	0	0	0	0	0	0	0	0	0	0	0	0	0	0	0	0	0	0	0	0	0	0	0	0	0	0	0	0	0	0	0	0	0	0	0	0	0	0	0
Bacteria	Actinobacteria	Actinobacteria	Propionibacteriales	Nocardioidaceae	Nocardioides		2|201174|1760|85009|85015|1839	0	0	0	0	0	0	0	0	0	0	0	0	0	0	0	0	0	0	0	0	0	0	0	0	0	0	0	0	0	0	0	0	0	0	0	0	0	0	0	0	0	0
Bacteria	Actinobacteria	Actinobacteria	Propionibacteriales	Nocardioidaceae	Nocardioides	Nocardioides_currus	2|201174|1760|85009|85015|1839|2133958	0	0	0	0	0	0	0	0	0	0	0	0	0	0	0	0	0	0	0	0	0	0	0	0	0	0	0	0	0	0	0	0	0	0	0	0	0	0	0	0	0	0
Bacteria	Actinobacteria	Actinobacteria	Propionibacteriales	Nocardioidaceae	Nocardioides	Nocardioides_lianchengensis	2|201174|1760|85009|85015|1839|1045774	0	0	0	0	0	0	0	0	0	0	0	0	0	0	0	0	0	0	0	0	0	0	0	0	0	0	0	0	0	0	0	0	0	0	0	0	0	0	0	0	0	0
Bacteria	Actinobacteria	Actinobacteria	Propionibacteriales	Nocardioidaceae	Nocardioides	Nocardioides_luteus	2|201174|1760|85009|85015|1839|1844	0	0	0	0	0	0	0	0	0	0	0	0	0	0	0	0	0	0	0	0	0	0	0	0	0	0	0	0	0	0	0	0	0	0	0	0	0	0	0	0	0	0
Bacteria	Actinobacteria	Actinobacteria	Propionibacteriales	Propionibacteriaceae			2|201174|1760|85009|31957	0	0	0	0	0	0.00828	0.00543	0.01569	0.00324	0.00185	0	0	0	0.03868	0	0	0	0	0	0	0	0	0	0	0	0	0	0	0	0	0	0	0	0	0	0	0	0	0	0	0	0
Bacteria	Actinobacteria	Actinobacteria	Propionibacteriales	Propionibacteriaceae	Cutibacterium		2|201174|1760|85009|31957|1912216	0	0	0	0	0	0	0	0	0	0	0	0	0	0	0	0	0	0	0	0	0	0	0	0	0	0	0	0	0	0	0	0	0	0	0	0	0	0	0	0	0	0
Bacteria	Actinobacteria	Actinobacteria	Propionibacteriales	Propionibacteriaceae	Cutibacterium	Cutibacterium_acnes	2|201174|1760|85009|31957|1912216|1747	0	0	0	0	0	0	0	0	0	0	0	0	0	0	0	0	0	0	0	0	0	0	0	0	0	0	0	0	0	0	0	0	0	0	0	0	0	0	0	0	0	0
Bacteria	Actinobacteria	Actinobacteria	Propionibacteriales	Propionibacteriaceae	Luteococcus		2|201174|1760|85009|31957|33983	0	0	0	0	0	0	0	0	0	0	0	0	0	0	0	0	0	0	0	0	0	0	0	0	0	0	0	0	0	0	0	0	0	0	0	0	0	0	0	0	0	0
Bacteria	Actinobacteria	Actinobacteria	Propionibacteriales	Propionibacteriaceae	Luteococcus	Luteococcus_japonicus	2|201174|1760|85009|31957|33983|33984	0	0	0	0	0	0	0	0	0	0	0	0	0	0	0	0	0	0	0	0	0	0	0	0	0	0	0	0	0	0	0	0	0	0	0	0	0	0	0	0	0	0
Bacteria	Actinobacteria	Actinobacteria	Propionibacteriales	Propionibacteriaceae	Tessaracoccus		2|201174|1760|85009|31957|72763	0	0	0	0	0	0.00828	0.00543	0.01569	0.00324	0.00185	0	0	0	0.03868	0	0	0	0	0	0	0	0	0	0	0	0	0	0	0	0	0	0	0	0	0	0	0	0	0	0	0	0
Bacteria	Actinobacteria	Actinobacteria	Propionibacteriales	Propionibacteriaceae	Tessaracoccus	Tessaracoccus_aquimaris	2|201174|1760|85009|31957|72763|1332264	0	0	0	0	0	0	0	0	0	0	0	0	0	0	0	0	0	0	0	0	0	0	0	0	0	0	0	0	0	0	0	0	0	0	0	0	0	0	0	0	0	0
Bacteria	Actinobacteria	Actinobacteria	Propionibacteriales	Propionibacteriaceae	Tessaracoccus	Tessaracoccus_flavescens	2|201174|1760|85009|31957|72763|399497	0	0	0	0	0	0.00828	0.00543	0.01569	0.00324	0.00185	0	0	0	0	0	0	0	0	0	0	0	0	0	0	0	0	0	0	0	0	0	0	0	0	0	0	0	0	0	0	0	0
Bacteria	Actinobacteria	Actinobacteria	Propionibacteriales	Propionibacteriaceae	Tessaracoccus	Tessaracoccus_flavus	2|201174|1760|85009|31957|72763|1610493	0	0	0	0	0	0	0	0	0	0	0	0	0	0.03868	0	0	0	0	0	0	0	0	0	0	0	0	0	0	0	0	0	0	0	0	0	0	0	0	0	0	0	0
Bacteria	Actinobacteria	Actinobacteria	Propionibacteriales	Propionibacteriaceae	Tessaracoccus	Tessaracoccus_oleiagri	2|201174|1760|85009|31957|72763|686624	0	0	0	0	0	0	0	0	0	0	0	0	0	0	0	0	0	0	0	0	0	0	0	0	0	0	0	0	0	0	0	0	0	0	0	0	0	0	0	0	0	0
Bacteria	Actinobacteria	Actinobacteria	Pseudonocardiales				2|201174|1760|85010	0	0	0	0	0	0	0	0	0	0	0	0	0	0.14396	0	0	0	0	0	0	0	0	0	0	0	0	0	0	0	0	0	0	0	0	0	0	0	0	0	0	0	0
Bacteria	Actinobacteria	Actinobacteria	Pseudonocardiales	Pseudonocardiaceae			2|201174|1760|85010|2070	0	0	0	0	0	0	0	0	0	0	0	0	0	0.14396	0	0	0	0	0	0	0	0	0	0	0	0	0	0	0	0	0	0	0	0	0	0	0	0	0	0	0	0
Bacteria	Actinobacteria	Actinobacteria	Pseudonocardiales	Pseudonocardiaceae	Actinokineospora		2|201174|1760|85010|2070|39845	0	0	0	0	0	0	0	0	0	0	0	0	0	0	0	0	0	0	0	0	0	0	0	0	0	0	0	0	0	0	0	0	0	0	0	0	0	0	0	0	0	0
Bacteria	Actinobacteria	Actinobacteria	Pseudonocardiales	Pseudonocardiaceae	Actinokineospora	Actinokineospora_spheciospongiae	2|201174|1760|85010|2070|39845|909613	0	0	0	0	0	0	0	0	0	0	0	0	0	0	0	0	0	0	0	0	0	0	0	0	0	0	0	0	0	0	0	0	0	0	0	0	0	0	0	0	0	0
Bacteria	Actinobacteria	Actinobacteria	Pseudonocardiales	Pseudonocardiaceae	Actinomycetospora		2|201174|1760|85010|2070|402649	0	0	0	0	0	0	0	0	0	0	0	0	0	0.14396	0	0	0	0	0	0	0	0	0	0	0	0	0	0	0	0	0	0	0	0	0	0	0	0	0	0	0	0
Bacteria	Actinobacteria	Actinobacteria	Pseudonocardiales	Pseudonocardiaceae	Actinomycetospora	Actinomycetospora_cinnamomea	2|201174|1760|85010|2070|402649|663609	0	0	0	0	0	0	0	0	0	0	0	0	0	0.14396	0	0	0	0	0	0	0	0	0	0	0	0	0	0	0	0	0	0	0	0	0	0	0	0	0	0	0	0
Bacteria	Actinobacteria	Actinobacteria	Pseudonocardiales	Pseudonocardiaceae	Allokutzneria		2|201174|1760|85010|2070|1137960	0	0	0	0	0	0	0	0	0	0	0	0	0	0	0	0	0	0	0	0	0	0	0	0	0	0	0	0	0	0	0	0	0	0	0	0	0	0	0	0	0	0
Bacteria	Actinobacteria	Actinobacteria	Pseudonocardiales	Pseudonocardiaceae	Allokutzneria	Allokutzneria_albata	2|201174|1760|85010|2070|1137960|211114	0	0	0	0	0	0	0	0	0	0	0	0	0	0	0	0	0	0	0	0	0	0	0	0	0	0	0	0	0	0	0	0	0	0	0	0	0	0	0	0	0	0
Bacteria	Actinobacteria	Actinobacteria	Pseudonocardiales	Pseudonocardiaceae	Amycolatopsis		2|201174|1760|85010|2070|1813	0	0	0	0	0	0	0	0	0	0	0	0	0	0	0	0	0	0	0	0	0	0	0	0	0	0	0	0	0	0	0	0	0	0	0	0	0	0	0	0	0	0
Bacteria	Actinobacteria	Actinobacteria	Pseudonocardiales	Pseudonocardiaceae	Amycolatopsis	Amycolatopsis_lurida	2|201174|1760|85010|2070|1813|31959	0	0	0	0	0	0	0	0	0	0	0	0	0	0	0	0	0	0	0	0	0	0	0	0	0	0	0	0	0	0	0	0	0	0	0	0	0	0	0	0	0	0
Bacteria	Actinobacteria	Actinobacteria	Pseudonocardiales	Pseudonocardiaceae	Amycolatopsis	Amycolatopsis_orientalis	2|201174|1760|85010|2070|1813|31958	0	0	0	0	0	0	0	0	0	0	0	0	0	0	0	0	0	0	0	0	0	0	0	0	0	0	0	0	0	0	0	0	0	0	0	0	0	0	0	0	0	0
Bacteria	Actinobacteria	Actinobacteria	Pseudonocardiales	Pseudonocardiaceae	Amycolatopsis	Amycolatopsis_pretoriensis	2|201174|1760|85010|2070|1813|218821	0	0	0	0	0	0	0	0	0	0	0	0	0	0	0	0	0	0	0	0	0	0	0	0	0	0	0	0	0	0	0	0	0	0	0	0	0	0	0	0	0	0
Bacteria	Actinobacteria	Actinobacteria	Pseudonocardiales	Pseudonocardiaceae	Amycolatopsis	Amycolatopsis_vancoresmycina	2|201174|1760|85010|2070|1813|208444	0	0	0	0	0	0	0	0	0	0	0	0	0	0	0	0	0	0	0	0	0	0	0	0	0	0	0	0	0	0	0	0	0	0	0	0	0	0	0	0	0	0
Bacteria	Actinobacteria	Actinobacteria	Pseudonocardiales	Pseudonocardiaceae	Amycolatopsis	Amycolatopsis_xylanica	2|201174|1760|85010|2070|1813|589385	0	0	0	0	0	0	0	0	0	0	0	0	0	0	0	0	0	0	0	0	0	0	0	0	0	0	0	0	0	0	0	0	0	0	0	0	0	0	0	0	0	0
Bacteria	Actinobacteria	Actinobacteria	Pseudonocardiales	Pseudonocardiaceae	Kutzneria		2|201174|1760|85010|2070|43356	0	0	0	0	0	0	0	0	0	0	0	0	0	0	0	0	0	0	0	0	0	0	0	0	0	0	0	0	0	0	0	0	0	0	0	0	0	0	0	0	0	0
Bacteria	Actinobacteria	Actinobacteria	Pseudonocardiales	Pseudonocardiaceae	Kutzneria	Kutzneria_buriramensis	2|201174|1760|85010|2070|43356|1045776	0	0	0	0	0	0	0	0	0	0	0	0	0	0	0	0	0	0	0	0	0	0	0	0	0	0	0	0	0	0	0	0	0	0	0	0	0	0	0	0	0	0
Bacteria	Actinobacteria	Actinobacteria	Pseudonocardiales	Pseudonocardiaceae	Lechevalieria		2|201174|1760|85010|2070|166974	0	0	0	0	0	0	0	0	0	0	0	0	0	0	0	0	0	0	0	0	0	0	0	0	0	0	0	0	0	0	0	0	0	0	0	0	0	0	0	0	0	0
Bacteria	Actinobacteria	Actinobacteria	Pseudonocardiales	Pseudonocardiaceae	Lechevalieria	Lechevalieria_atacamensis	2|201174|1760|85010|2070|166974|531938	0	0	0	0	0	0	0	0	0	0	0	0	0	0	0	0	0	0	0	0	0	0	0	0	0	0	0	0	0	0	0	0	0	0	0	0	0	0	0	0	0	0
Bacteria	Actinobacteria	Actinobacteria	Pseudonocardiales	Pseudonocardiaceae	Lentzea		2|201174|1760|85010|2070|165301	0	0	0	0	0	0	0	0	0	0	0	0	0	0	0	0	0	0	0	0	0	0	0	0	0	0	0	0	0	0	0	0	0	0	0	0	0	0	0	0	0	0
Bacteria	Actinobacteria	Actinobacteria	Pseudonocardiales	Pseudonocardiaceae	Lentzea	Lentzea_flaviverrucosa	2|201174|1760|85010|2070|165301|200379	0	0	0	0	0	0	0	0	0	0	0	0	0	0	0	0	0	0	0	0	0	0	0	0	0	0	0	0	0	0	0	0	0	0	0	0	0	0	0	0	0	0
Bacteria	Actinobacteria	Actinobacteria	Pseudonocardiales	Pseudonocardiaceae	Pseudonocardia		2|201174|1760|85010|2070|1847	0	0	0	0	0	0	0	0	0	0	0	0	0	0	0	0	0	0	0	0	0	0	0	0	0	0	0	0	0	0	0	0	0	0	0	0	0	0	0	0	0	0
Bacteria	Actinobacteria	Actinobacteria	Pseudonocardiales	Pseudonocardiaceae	Pseudonocardia	Pseudonocardia_alni	2|201174|1760|85010|2070|1847|33907	0	0	0	0	0	0	0	0	0	0	0	0	0	0	0	0	0	0	0	0	0	0	0	0	0	0	0	0	0	0	0	0	0	0	0	0	0	0	0	0	0	0
Bacteria	Actinobacteria	Actinobacteria	Pseudonocardiales	Pseudonocardiaceae	Pseudonocardia	Pseudonocardia_ammonioxydans	2|201174|1760|85010|2070|1847|260086	0	0	0	0	0	0	0	0	0	0	0	0	0	0	0	0	0	0	0	0	0	0	0	0	0	0	0	0	0	0	0	0	0	0	0	0	0	0	0	0	0	0
Bacteria	Actinobacteria	Actinobacteria	Pseudonocardiales	Pseudonocardiaceae	Pseudonocardia	Pseudonocardia_autotrophica	2|201174|1760|85010|2070|1847|2074	0	0	0	0	0	0	0	0	0	0	0	0	0	0	0	0	0	0	0	0	0	0	0	0	0	0	0	0	0	0	0	0	0	0	0	0	0	0	0	0	0	0
Bacteria	Actinobacteria	Actinobacteria	Pseudonocardiales	Pseudonocardiaceae	Saccharomonospora		2|201174|1760|85010|2070|1851	0	0	0	0	0	0	0	0	0	0	0	0	0	0	0	0	0	0	0	0	0	0	0	0	0	0	0	0	0	0	0	0	0	0	0	0	0	0	0	0	0	0
Bacteria	Actinobacteria	Actinobacteria	Pseudonocardiales	Pseudonocardiaceae	Saccharomonospora	Saccharomonospora_azurea	2|201174|1760|85010|2070|1851|40988	0	0	0	0	0	0	0	0	0	0	0	0	0	0	0	0	0	0	0	0	0	0	0	0	0	0	0	0	0	0	0	0	0	0	0	0	0	0	0	0	0	0
Bacteria	Actinobacteria	Actinobacteria	Pseudonocardiales	Pseudonocardiaceae	Saccharopolyspora		2|201174|1760|85010|2070|1835	0	0	0	0	0	0	0	0	0	0	0	0	0	0	0	0	0	0	0	0	0	0	0	0	0	0	0	0	0	0	0	0	0	0	0	0	0	0	0	0	0	0
Bacteria	Actinobacteria	Actinobacteria	Pseudonocardiales	Pseudonocardiaceae	Saccharopolyspora	Saccharopolyspora_rectivirgula	2|201174|1760|85010|2070|1835|28042	0	0	0	0	0	0	0	0	0	0	0	0	0	0	0	0	0	0	0	0	0	0	0	0	0	0	0	0	0	0	0	0	0	0	0	0	0	0	0	0	0	0
Bacteria	Actinobacteria	Actinobacteria	Pseudonocardiales	Pseudonocardiaceae	Saccharothrix		2|201174|1760|85010|2070|2071	0	0	0	0	0	0	0	0	0	0	0	0	0	0	0	0	0	0	0	0	0	0	0	0	0	0	0	0	0	0	0	0	0	0	0	0	0	0	0	0	0	0
Bacteria	Actinobacteria	Actinobacteria	Pseudonocardiales	Pseudonocardiaceae	Saccharothrix	Saccharothrix_sp_NRRL_B_16348	2|201174|1760|85010|2070|2071|1415542	0	0	0	0	0	0	0	0	0	0	0	0	0	0	0	0	0	0	0	0	0	0	0	0	0	0	0	0	0	0	0	0	0	0	0	0	0	0	0	0	0	0
Bacteria	Actinobacteria	Actinobacteria	Pseudonocardiales	Pseudonocardiales_unclassified			2|201174|1760|85010|	0	0	0	0	0	0	0	0	0	0	0	0	0	0	0	0	0	0	0	0	0	0	0	0	0	0	0	0	0	0	0	0	0	0	0	0	0	0	0	0	0	0
Bacteria	Actinobacteria	Actinobacteria	Pseudonocardiales	Pseudonocardiales_unclassified	Pseudonocardiales_unclassified		2|201174|1760|85010||	0	0	0	0	0	0	0	0	0	0	0	0	0	0	0	0	0	0	0	0	0	0	0	0	0	0	0	0	0	0	0	0	0	0	0	0	0	0	0	0	0	0
Bacteria	Actinobacteria	Actinobacteria	Pseudonocardiales	Pseudonocardiales_unclassified	Pseudonocardiales_unclassified	Pseudonocardiales_bacterium	2|201174|1760|85010|||2201155	0	0	0	0	0	0	0	0	0	0	0	0	0	0	0	0	0	0	0	0	0	0	0	0	0	0	0	0	0	0	0	0	0	0	0	0	0	0	0	0	0	0
Bacteria	Actinobacteria	Actinobacteria	Streptomycetales				2|201174|1760|85011	0	0	0	0	0	0	0	0	0	0	0	0	0.03484	0.12191	0	0.58035	0	0	0	0	0	0	0	0	0	0	0	0	0	0	0	0	0	0	0	0	0	0	0	0	0	0
Bacteria	Actinobacteria	Actinobacteria	Streptomycetales	Streptomycetaceae			2|201174|1760|85011|2062	0	0	0	0	0	0	0	0	0	0	0	0	0.03484	0.12191	0	0.58035	0	0	0	0	0	0	0	0	0	0	0	0	0	0	0	0	0	0	0	0	0	0	0	0	0	0
Bacteria	Actinobacteria	Actinobacteria	Streptomycetales	Streptomycetaceae	Streptomyces		2|201174|1760|85011|2062|1883	0	0	0	0	0	0	0	0	0	0	0	0	0.03484	0.12191	0	0.58035	0	0	0	0	0	0	0	0	0	0	0	0	0	0	0	0	0	0	0	0	0	0	0	0	0	0
Bacteria	Actinobacteria	Actinobacteria	Streptomycetales	Streptomycetaceae	Streptomyces	Streptomyces_afghaniensis	2|201174|1760|85011|2062|1883|66865	0	0	0	0	0	0	0	0	0	0	0	0	0	0	0	0	0	0	0	0	0	0	0	0	0	0	0	0	0	0	0	0	0	0	0	0	0	0	0	0	0	0
Bacteria	Actinobacteria	Actinobacteria	Streptomycetales	Streptomycetaceae	Streptomyces	Streptomyces_albidoflavus	2|201174|1760|85011|2062|1883|1886	0	0	0	0	0	0	0	0	0	0	0	0	0	0	0	0	0	0	0	0	0	0	0	0	0	0	0	0	0	0	0	0	0	0	0	0	0	0	0	0	0	0
Bacteria	Actinobacteria	Actinobacteria	Streptomycetales	Streptomycetaceae	Streptomyces	Streptomyces_albus	2|201174|1760|85011|2062|1883|1888	0	0	0	0	0	0	0	0	0	0	0	0	0	0	0	0	0	0	0	0	0	0	0	0	0	0	0	0	0	0	0	0	0	0	0	0	0	0	0	0	0	0
Bacteria	Actinobacteria	Actinobacteria	Streptomycetales	Streptomycetaceae	Streptomyces	Streptomyces_aurantiacus	2|201174|1760|85011|2062|1883|47760	0	0	0	0	0	0	0	0	0	0	0	0	0	0	0	0	0	0	0	0	0	0	0	0	0	0	0	0	0	0	0	0	0	0	0	0	0	0	0	0	0	0
Bacteria	Actinobacteria	Actinobacteria	Streptomycetales	Streptomycetaceae	Streptomyces	Streptomyces_badius	2|201174|1760|85011|2062|1883|1941	0	0	0	0	0	0	0	0	0	0	0	0	0	0	0	0	0	0	0	0	0	0	0	0	0	0	0	0	0	0	0	0	0	0	0	0	0	0	0	0	0	0
Bacteria	Actinobacteria	Actinobacteria	Streptomycetales	Streptomycetaceae	Streptomyces	Streptomyces_cavourensis	2|201174|1760|85011|2062|1883|67258	0	0	0	0	0	0	0	0	0	0	0	0	0	0	0	0	0	0	0	0	0	0	0	0	0	0	0	0	0	0	0	0	0	0	0	0	0	0	0	0	0	0
Bacteria	Actinobacteria	Actinobacteria	Streptomycetales	Streptomycetaceae	Streptomyces	Streptomyces_coelicoflavus	2|201174|1760|85011|2062|1883|285562	0	0	0	0	0	0	0	0	0	0	0	0	0	0	0	0	0	0	0	0	0	0	0	0	0	0	0	0	0	0	0	0	0	0	0	0	0	0	0	0	0	0
Bacteria	Actinobacteria	Actinobacteria	Streptomycetales	Streptomycetaceae	Streptomyces	Streptomyces_filamentosus	2|201174|1760|85011|2062|1883|67294	0	0	0	0	0	0	0	0	0	0	0	0	0	0	0	0	0	0	0	0	0	0	0	0	0	0	0	0	0	0	0	0	0	0	0	0	0	0	0	0	0	0
Bacteria	Actinobacteria	Actinobacteria	Streptomycetales	Streptomycetaceae	Streptomyces	Streptomyces_gancidicus	2|201174|1760|85011|2062|1883|68204	0	0	0	0	0	0	0	0	0	0	0	0	0	0	0	0.04063	0	0	0	0	0	0	0	0	0	0	0	0	0	0	0	0	0	0	0	0	0	0	0	0	0	0
Bacteria	Actinobacteria	Actinobacteria	Streptomycetales	Streptomycetaceae	Streptomyces	Streptomyces_globisporus	2|201174|1760|85011|2062|1883|1908	0	0	0	0	0	0	0	0	0	0	0	0	0	0	0	0	0	0	0	0	0	0	0	0	0	0	0	0	0	0	0	0	0	0	0	0	0	0	0	0	0	0
Bacteria	Actinobacteria	Actinobacteria	Streptomycetales	Streptomycetaceae	Streptomyces	Streptomyces_globosus	2|201174|1760|85011|2062|1883|68209	0	0	0	0	0	0	0	0	0	0	0	0	0	0.12191	0	0	0	0	0	0	0	0	0	0	0	0	0	0	0	0	0	0	0	0	0	0	0	0	0	0	0	0
Bacteria	Actinobacteria	Actinobacteria	Streptomycetales	Streptomycetaceae	Streptomyces	Streptomyces_griseoaurantiacus	2|201174|1760|85011|2062|1883|68213	0	0	0	0	0	0	0	0	0	0	0	0	0	0	0	0	0	0	0	0	0	0	0	0	0	0	0	0	0	0	0	0	0	0	0	0	0	0	0	0	0	0
Bacteria	Actinobacteria	Actinobacteria	Streptomycetales	Streptomycetaceae	Streptomyces	Streptomyces_griseorubens	2|201174|1760|85011|2062|1883|66897	0	0	0	0	0	0	0	0	0	0	0	0	0	0	0	0.53972	0	0	0	0	0	0	0	0	0	0	0	0	0	0	0	0	0	0	0	0	0	0	0	0	0	0
Bacteria	Actinobacteria	Actinobacteria	Streptomycetales	Streptomycetaceae	Streptomyces	Streptomyces_griseorubiginosus	2|201174|1760|85011|2062|1883|67304	0	0	0	0	0	0	0	0	0	0	0	0	0	0	0	0	0	0	0	0	0	0	0	0	0	0	0	0	0	0	0	0	0	0	0	0	0	0	0	0	0	0
Bacteria	Actinobacteria	Actinobacteria	Streptomycetales	Streptomycetaceae	Streptomyces	Streptomyces_griseus	2|201174|1760|85011|2062|1883|1911	0	0	0	0	0	0	0	0	0	0	0	0	0.03484	0	0	0	0	0	0	0	0	0	0	0	0	0	0	0	0	0	0	0	0	0	0	0	0	0	0	0	0	0
Bacteria	Actinobacteria	Actinobacteria	Streptomycetales	Streptomycetaceae	Streptomyces	Streptomyces_lincolnensis	2|201174|1760|85011|2062|1883|1915	0	0	0	0	0	0	0	0	0	0	0	0	0	0	0	0	0	0	0	0	0	0	0	0	0	0	0	0	0	0	0	0	0	0	0	0	0	0	0	0	0	0
Bacteria	Actinobacteria	Actinobacteria	Streptomycetales	Streptomycetaceae	Streptomyces	Streptomyces_lividans	2|201174|1760|85011|2062|1883|1916	0	0	0	0	0	0	0	0	0	0	0	0	0	0	0	0	0	0	0	0	0	0	0	0	0	0	0	0	0	0	0	0	0	0	0	0	0	0	0	0	0	0
Bacteria	Actinobacteria	Actinobacteria	Streptomycetales	Streptomycetaceae	Streptomyces	Streptomyces_radiopugnans	2|201174|1760|85011|2062|1883|403935	0	0	0	0	0	0	0	0	0	0	0	0	0	0	0	0	0	0	0	0	0	0	0	0	0	0	0	0	0	0	0	0	0	0	0	0	0	0	0	0	0	0
Bacteria	Actinobacteria	Actinobacteria	Streptomycetales	Streptomycetaceae	Streptomyces	Streptomyces_scabiei	2|201174|1760|85011|2062|1883|1930	0	0	0	0	0	0	0	0	0	0	0	0	0	0	0	0	0	0	0	0	0	0	0	0	0	0	0	0	0	0	0	0	0	0	0	0	0	0	0	0	0	0
Bacteria	Actinobacteria	Actinobacteria	Streptomycetales	Streptomycetaceae	Streptomyces	Streptomyces_sp_Ag82_G6_1	2|201174|1760|85011|2062|1883|1938853	0	0	0	0	0	0	0	0	0	0	0	0	0	0	0	0	0	0	0	0	0	0	0	0	0	0	0	0	0	0	0	0	0	0	0	0	0	0	0	0	0	0
Bacteria	Actinobacteria	Actinobacteria	Streptomycetales	Streptomycetaceae	Streptomyces	Streptomyces_sp_CS113	2|201174|1760|85011|2062|1883|1982761	0	0	0	0	0	0	0	0	0	0	0	0	0	0	0	0	0	0	0	0	0	0	0	0	0	0	0	0	0	0	0	0	0	0	0	0	0	0	0	0	0	0
Bacteria	Actinobacteria	Actinobacteria	Streptomycetales	Streptomycetaceae	Streptomyces	Streptomyces_sp_DJ	2|201174|1760|85011|2062|1883|2067551	0	0	0	0	0	0	0	0	0	0	0	0	0	0	0	0	0	0	0	0	0	0	0	0	0	0	0	0	0	0	0	0	0	0	0	0	0	0	0	0	0	0
Bacteria	Actinobacteria	Actinobacteria	Streptomycetales	Streptomycetaceae	Streptomyces	Streptomyces_toyocaensis	2|201174|1760|85011|2062|1883|55952	0	0	0	0	0	0	0	0	0	0	0	0	0	0	0	0	0	0	0	0	0	0	0	0	0	0	0	0	0	0	0	0	0	0	0	0	0	0	0	0	0	0
Bacteria	Actinobacteria	Actinobacteria	Streptomycetales	Streptomycetaceae	Streptomyces	Streptomyces_viridochromogenes	2|201174|1760|85011|2062|1883|1938	0	0	0	0	0	0	0	0	0	0	0	0	0	0	0	0	0	0	0	0	0	0	0	0	0	0	0	0	0	0	0	0	0	0	0	0	0	0	0	0	0	0
Bacteria	Actinobacteria	Actinobacteria	Streptomycetales	Streptomycetaceae	Streptomyces	Streptomyces_wadayamensis	2|201174|1760|85011|2062|1883|141454	0	0	0	0	0	0	0	0	0	0	0	0	0	0	0	0	0	0	0	0	0	0	0	0	0	0	0	0	0	0	0	0	0	0	0	0	0	0	0	0	0	0
Bacteria	Actinobacteria	Actinobacteria	Streptosporangiales				2|201174|1760|85012	0	0	0	0	0	0	0	0	0	0	0	0	0	0	0	0	0	0	0	0	0	0	0	0	0	0	0	0	0	0	0	0	0	0	0	0	0	0	0	0	0	0
Bacteria	Actinobacteria	Actinobacteria	Streptosporangiales	Streptosporangiaceae			2|201174|1760|85012|2004	0	0	0	0	0	0	0	0	0	0	0	0	0	0	0	0	0	0	0	0	0	0	0	0	0	0	0	0	0	0	0	0	0	0	0	0	0	0	0	0	0	0
Bacteria	Actinobacteria	Actinobacteria	Streptosporangiales	Streptosporangiaceae	Microbispora		2|201174|1760|85012|2004|2005	0	0	0	0	0	0	0	0	0	0	0	0	0	0	0	0	0	0	0	0	0	0	0	0	0	0	0	0	0	0	0	0	0	0	0	0	0	0	0	0	0	0
Bacteria	Actinobacteria	Actinobacteria	Streptosporangiales	Streptosporangiaceae	Microbispora	Microbispora_rosea	2|201174|1760|85012|2004|2005|58117	0	0	0	0	0	0	0	0	0	0	0	0	0	0	0	0	0	0	0	0	0	0	0	0	0	0	0	0	0	0	0	0	0	0	0	0	0	0	0	0	0	0
Bacteria	Actinobacteria	Actinobacteria	Streptosporangiales	Streptosporangiaceae	Nonomuraea		2|201174|1760|85012|2004|83681	0	0	0	0	0	0	0	0	0	0	0	0	0	0	0	0	0	0	0	0	0	0	0	0	0	0	0	0	0	0	0	0	0	0	0	0	0	0	0	0	0	0
Bacteria	Actinobacteria	Actinobacteria	Streptosporangiales	Streptosporangiaceae	Nonomuraea	Nonomuraea_fuscirosea	2|201174|1760|85012|2004|83681|1291556	0	0	0	0	0	0	0	0	0	0	0	0	0	0	0	0	0	0	0	0	0	0	0	0	0	0	0	0	0	0	0	0	0	0	0	0	0	0	0	0	0	0
Bacteria	Actinobacteria	Actinobacteria	Streptosporangiales	Streptosporangiaceae	Sphaerisporangium		2|201174|1760|85012|2004|321315	0	0	0	0	0	0	0	0	0	0	0	0	0	0	0	0	0	0	0	0	0	0	0	0	0	0	0	0	0	0	0	0	0	0	0	0	0	0	0	0	0	0
Bacteria	Actinobacteria	Actinobacteria	Streptosporangiales	Streptosporangiaceae	Sphaerisporangium	Sphaerisporangium_cinnabarinum	2|201174|1760|85012|2004|321315|47482	0	0	0	0	0	0	0	0	0	0	0	0	0	0	0	0	0	0	0	0	0	0	0	0	0	0	0	0	0	0	0	0	0	0	0	0	0	0	0	0	0	0
Bacteria	Actinobacteria	Coriobacteriia					2|201174|84998	0.25143	0.25143	0.77732	0.41722	0.76373	0.44933	0.50825	0.56176	0.44915	0.46192	0	0	0	0	0	0	0	0	0	0	0	0	0	0	0.00755	0.00587	0.01039	0.07833	0.01234	0.01179	0.0174	0.00109	0.00625	0	0	0.00613	0.01232	0	0.00422	0	0	0
Bacteria	Actinobacteria	Coriobacteriia	Coriobacteriales				2|201174|84998|84999	0.07344	0.07344	0.48661	0.22839	0.5298	0.36359	0.42313	0.45488	0.34235	0.39708	0	0	0	0	0	0	0	0	0	0	0	0	0	0	0.00376	0.00502	0.00468	0.06632	0.00729	0.00854	0.00764	0.00103	0.00475	0	0	0.00358	0.00366	0	0.00137	0	0	0
Bacteria	Actinobacteria	Coriobacteriia	Coriobacteriales	Atopobiaceae			2|201174|84998|84999|1643824	0	0	0	0	0	0	0	0	0	0	0	0	0	0	0	0	0	0	0	0	0	0	0	0	0	0	0	0	0	0.00031	0	0	0	0	0	0.00119	0	0	0	0	0	0
Bacteria	Actinobacteria	Coriobacteriia	Coriobacteriales	Atopobiaceae	Atopobium		2|201174|84998|84999|1643824|1380	0	0	0	0	0	0	0	0	0	0	0	0	0	0	0	0	0	0	0	0	0	0	0	0	0	0	0	0	0	0.00031	0	0	0	0	0	0.00119	0	0	0	0	0	0
Bacteria	Actinobacteria	Coriobacteriia	Coriobacteriales	Atopobiaceae	Atopobium	Atopobium_deltae	2|201174|84998|84999|1643824|1380|1393034	0	0	0	0	0	0	0	0	0	0	0	0	0	0	0	0	0	0	0	0	0	0	0	0	0	0	0	0	0	0.00031	0	0	0	0	0	0.00119	0	0	0	0	0	0
Bacteria	Actinobacteria	Coriobacteriia	Coriobacteriales	Coriobacteriaceae			2|201174|84998|84999|84107	0.07344	0.07344	0.48661	0.22839	0.5298	0.36359	0.42313	0.45488	0.34235	0.39708	0	0	0	0	0	0	0	0	0	0	0	0	0	0	0.00376	0.00502	0.00468	0.06632	0.00729	0.00822	0.00764	0.00103	0.00475	0	0	0.0024	0.00366	0	0.00137	0	0	0
Bacteria	Actinobacteria	Coriobacteriia	Coriobacteriales	Coriobacteriaceae	Collinsella		2|201174|84998|84999|84107|102106	0	0	0.00174	0	0.0018	0.00668	0.00605	0.00503	0	0.00602	0	0	0	0	0	0	0	0	0	0	0	0	0	0	0	0	0	0	0	0	0	0	0	0	0	0	0	0	0	0	0	0
Bacteria	Actinobacteria	Coriobacteriia	Coriobacteriales	Coriobacteriaceae	Collinsella	Collinsella_aerofaciens	2|201174|84998|84999|84107|102106|74426	0	0	0	0	0	0.00184	0	0.00212	0	0	0	0	0	0	0	0	0	0	0	0	0	0	0	0	0	0	0	0	0	0	0	0	0	0	0	0	0	0	0	0	0	0
Bacteria	Actinobacteria	Coriobacteriia	Coriobacteriales	Coriobacteriaceae	Collinsella	Collinsella_intestinalis	2|201174|84998|84999|84107|102106|147207	0	0	0	0	0	0.00103	0	0	0	0	0	0	0	0	0	0	0	0	0	0	0	0	0	0	0	0	0	0	0	0	0	0	0	0	0	0	0	0	0	0	0	0
Bacteria	Actinobacteria	Coriobacteriia	Coriobacteriales	Coriobacteriaceae	Collinsella	Collinsella_stercoris	2|201174|84998|84999|84107|102106|147206	0	0	0.00174	0	0.0018	0.00381	0.00605	0.00291	0	0.00602	0	0	0	0	0	0	0	0	0	0	0	0	0	0	0	0	0	0	0	0	0	0	0	0	0	0	0	0	0	0	0	0
Bacteria	Actinobacteria	Coriobacteriia	Coriobacteriales	Coriobacteriaceae	Enorma		2|201174|84998|84999|84107|1472762	0.07344	0.07344	0.48488	0.22839	0.528	0.35691	0.41708	0.44985	0.34235	0.39106	0	0	0	0	0	0	0	0	0	0	0	0	0	0	0.00376	0.00502	0.00468	0.06632	0.00729	0.00822	0.00764	0.00103	0.00475	0	0	0.0024	0.00366	0	0.00137	0	0	0
Bacteria	Actinobacteria	Coriobacteriia	Coriobacteriales	Coriobacteriaceae	Enorma	Enorma_massiliensis	2|201174|84998|84999|84107|1472762|1472761	0.07207	0.07207	0.47129	0.22162	0.50583	0.32687	0.38708	0.42183	0.33853	0.36307	0	0	0	0	0	0	0	0	0	0	0	0	0	0	0.00376	0.00502	0.00468	0.06447	0.00729	0.00822	0.00764	0.00103	0.00475	0	0	0.0024	0.00351	0	0.00137	0	0	0
Bacteria	Actinobacteria	Coriobacteriia	Coriobacteriales	Coriobacteriaceae	Enorma	[Collinsella]_massiliensis	2|201174|84998|84999|84107|1472762|1232426	0.00137	0.00137	0.01358	0.00676	0.02217	0.03004	0.03	0.02802	0.00382	0.028	0	0	0	0	0	0	0	0	0	0	0	0	0	0	0	0	0	0.00185	0	0	0	0	0	0	0	0	0.00015	0	0	0	0	0
Bacteria	Actinobacteria	Coriobacteriia	Eggerthellales				2|201174|84998|1643822	0.17799	0.17799	0.29071	0.18884	0.23393	0.08574	0.08512	0.10688	0.1068	0.06484	0	0	0	0	0	0	0	0	0	0	0	0	0	0	0.00379	0.00085	0.00571	0.01201	0.00505	0.00325	0.00976	5e-05	0.0015	0	0	0.00254	0.00866	0	0.00285	0	0	0
Bacteria	Actinobacteria	Coriobacteriia	Eggerthellales	Eggerthellaceae			2|201174|84998|1643822|1643826	0.17799	0.17799	0.29071	0.18884	0.23393	0.08574	0.08512	0.10688	0.1068	0.06484	0	0	0	0	0	0	0	0	0	0	0	0	0	0	0.00379	0.00085	0.00571	0.01201	0.00505	0.00325	0.00976	5e-05	0.0015	0	0	0.00254	0.00866	0	0.00285	0	0	0
Bacteria	Actinobacteria	Coriobacteriia	Eggerthellales	Eggerthellaceae	Adlercreutzia		2|201174|84998|1643822|1643826|447020	0	0	0	0	0	0	0	0	0	0	0	0	0	0	0	0	0	0	0	0	0	0	0	0	0	0	0	0	0	0	0	0	0	0	0	0	0	0	0	0	0	0
Bacteria	Actinobacteria	Coriobacteriia	Eggerthellales	Eggerthellaceae	Adlercreutzia	Adlercreutzia_equolifaciens	2|201174|84998|1643822|1643826|447020|446660	0	0	0	0	0	0	0	0	0	0	0	0	0	0	0	0	0	0	0	0	0	0	0	0	0	0	0	0	0	0	0	0	0	0	0	0	0	0	0	0	0	0
Bacteria	Actinobacteria	Coriobacteriia	Eggerthellales	Eggerthellaceae	Asaccharobacter		2|201174|84998|1643822|1643826|553372	0	0	0	0	0	0	0	0	0	0	0	0	0	0	0	0	0	0	0	0	0	0	0	0	0	0	0	0	0	0	0	0	0	0	0	0	0	0	0	0	0	0
Bacteria	Actinobacteria	Coriobacteriia	Eggerthellales	Eggerthellaceae	Asaccharobacter	Asaccharobacter_celatus	2|201174|84998|1643822|1643826|553372|394340	0	0	0	0	0	0	0	0	0	0	0	0	0	0	0	0	0	0	0	0	0	0	0	0	0	0	0	0	0	0	0	0	0	0	0	0	0	0	0	0	0	0
Bacteria	Actinobacteria	Coriobacteriia	Eggerthellales	Eggerthellaceae	Gordonibacter		2|201174|84998|1643822|1643826|644652	0.17799	0.17799	0.29071	0.18884	0.23393	0.08574	0.08512	0.10688	0.1068	0.06484	0	0	0	0	0	0	0	0	0	0	0	0	0	0	0.00379	0.00085	0.00571	0.01201	0.00505	0.00325	0.00976	5e-05	0.0015	0	0	0.00254	0.00866	0	0.00285	0	0	0
Bacteria	Actinobacteria	Coriobacteriia	Eggerthellales	Eggerthellaceae	Gordonibacter	Gordonibacter_pamelaeae	2|201174|84998|1643822|1643826|644652|471189	0.17799	0.17799	0.29071	0.18884	0.23393	0.08574	0.08512	0.10688	0.1068	0.06484	0	0	0	0	0	0	0	0	0	0	0	0	0	0	0.00379	0.00085	0.00571	0.01201	0.00505	0.00325	0.00976	5e-05	0.0015	0	0	0.00254	0.00866	0	0.00285	0	0	0
Bacteria	Actinobacteria	Rubrobacteria					2|201174|84995	0	0	0	0	0	0	0	0	0	0	0	0	0	0	0	0	0	0	0	0	0	0	0	0	0	0	0	0	0	0	0	0	0	0	0	0	0	0	0	0	0	0
Bacteria	Actinobacteria	Rubrobacteria	Rubrobacterales				2|201174|84995|84996	0	0	0	0	0	0	0	0	0	0	0	0	0	0	0	0	0	0	0	0	0	0	0	0	0	0	0	0	0	0	0	0	0	0	0	0	0	0	0	0	0	0
Bacteria	Actinobacteria	Rubrobacteria	Rubrobacterales	Rubrobacteraceae			2|201174|84995|84996|84997	0	0	0	0	0	0	0	0	0	0	0	0	0	0	0	0	0	0	0	0	0	0	0	0	0	0	0	0	0	0	0	0	0	0	0	0	0	0	0	0	0	0
Bacteria	Actinobacteria	Rubrobacteria	Rubrobacterales	Rubrobacteraceae	Rubrobacter		2|201174|84995|84996|84997|42255	0	0	0	0	0	0	0	0	0	0	0	0	0	0	0	0	0	0	0	0	0	0	0	0	0	0	0	0	0	0	0	0	0	0	0	0	0	0	0	0	0	0
Bacteria	Actinobacteria	Rubrobacteria	Rubrobacterales	Rubrobacteraceae	Rubrobacter	Rubrobacter_radiotolerans	2|201174|84995|84996|84997|42255|42256	0	0	0	0	0	0	0	0	0	0	0	0	0	0	0	0	0	0	0	0	0	0	0	0	0	0	0	0	0	0	0	0	0	0	0	0	0	0	0	0	0	0
Bacteria	Actinobacteria	Thermoleophilia					2|201174|1497346	0	0	0	0	0	0	0	0	0	0	0	0	0.13635	0.34257	0	0.01034	0	0	0	0	0	0	0	0	0	0	0	0	0	0	0	0	0	0	0	0	0	0	0	0	0	0
Bacteria	Actinobacteria	Thermoleophilia	Solirubrobacterales				2|201174|1497346|588673	0	0	0	0	0	0	0	0	0	0	0	0	0	0.21439	0	0	0	0	0	0	0	0	0	0	0	0	0	0	0	0	0	0	0	0	0	0	0	0	0	0	0	0
Bacteria	Actinobacteria	Thermoleophilia	Solirubrobacterales	Conexibacteraceae			2|201174|1497346|588673|320583	0	0	0	0	0	0	0	0	0	0	0	0	0	0.06795	0	0	0	0	0	0	0	0	0	0	0	0	0	0	0	0	0	0	0	0	0	0	0	0	0	0	0	0
Bacteria	Actinobacteria	Thermoleophilia	Solirubrobacterales	Conexibacteraceae	Conexibacter		2|201174|1497346|588673|320583|191494	0	0	0	0	0	0	0	0	0	0	0	0	0	0.06795	0	0	0	0	0	0	0	0	0	0	0	0	0	0	0	0	0	0	0	0	0	0	0	0	0	0	0	0
Bacteria	Actinobacteria	Thermoleophilia	Solirubrobacterales	Conexibacteraceae	Conexibacter	Conexibacter_woesei	2|201174|1497346|588673|320583|191494|191495	0	0	0	0	0	0	0	0	0	0	0	0	0	0.06795	0	0	0	0	0	0	0	0	0	0	0	0	0	0	0	0	0	0	0	0	0	0	0	0	0	0	0	0
Bacteria	Actinobacteria	Thermoleophilia	Solirubrobacterales	Patulibacteraceae			2|201174|1497346|588673|361606	0	0	0	0	0	0	0	0	0	0	0	0	0	0.14644	0	0	0	0	0	0	0	0	0	0	0	0	0	0	0	0	0	0	0	0	0	0	0	0	0	0	0	0
Bacteria	Actinobacteria	Thermoleophilia	Solirubrobacterales	Patulibacteraceae	Patulibacter		2|201174|1497346|588673|361606|361607	0	0	0	0	0	0	0	0	0	0	0	0	0	0.14644	0	0	0	0	0	0	0	0	0	0	0	0	0	0	0	0	0	0	0	0	0	0	0	0	0	0	0	0
Bacteria	Actinobacteria	Thermoleophilia	Solirubrobacterales	Patulibacteraceae	Patulibacter	Patulibacter_medicamentivorans	2|201174|1497346|588673|361606|361607|1097667	0	0	0	0	0	0	0	0	0	0	0	0	0	0.14644	0	0	0	0	0	0	0	0	0	0	0	0	0	0	0	0	0	0	0	0	0	0	0	0	0	0	0	0
Bacteria	Actinobacteria	Thermoleophilia	Thermoleophilales				2|201174|1497346|588674	0	0	0	0	0	0	0	0	0	0	0	0	0.13635	0.12818	0	0.01034	0	0	0	0	0	0	0	0	0	0	0	0	0	0	0	0	0	0	0	0	0	0	0	0	0	0
Bacteria	Actinobacteria	Thermoleophilia	Thermoleophilales	Thermoleophilaceae			2|201174|1497346|588674|320796	0	0	0	0	0	0	0	0	0	0	0	0	0.13635	0.12818	0	0.01034	0	0	0	0	0	0	0	0	0	0	0	0	0	0	0	0	0	0	0	0	0	0	0	0	0	0
Bacteria	Actinobacteria	Thermoleophilia	Thermoleophilales	Thermoleophilaceae	Thermoleophilum		2|201174|1497346|588674|320796|192992	0	0	0	0	0	0	0	0	0	0	0	0	0.13635	0.12818	0	0.01034	0	0	0	0	0	0	0	0	0	0	0	0	0	0	0	0	0	0	0	0	0	0	0	0	0	0
Bacteria	Actinobacteria	Thermoleophilia	Thermoleophilales	Thermoleophilaceae	Thermoleophilum	Thermoleophilum_album	2|201174|1497346|588674|320796|192992|29539	0	0	0	0	0	0	0	0	0	0	0	0	0.13635	0.12818	0	0.01034	0	0	0	0	0	0	0	0	0	0	0	0	0	0	0	0	0	0	0	0	0	0	0	0	0	0
Bacteria	Bacteroidetes						2|976	48.67513	48.67513	30.55924	60.66982	32.09134	17.72782	33.52504	16.74542	23.71455	39.81508	2.59416	1.92316	27.9118	0.75818	26.60352	14.75008	3.28042	7.09223	8.57492	0.12912	0	6.8148	0	9.79256	2.99312	8.99362	15.97819	35.23867	6.6239	0.43376	0.4777	0.27889	5.14188	2.67442	0.30635	0.27527	40.55751	2.39253	6.59745	0	0	0
Bacteria	Bacteroidetes	Bacteroidetes_unclassified						0	0	0	0	0	0	0	0	0	0	0	0	0	0	0	0	0	0	0	0	0	0	0	0	0	0	0	0	0	0	0	0	0	0	0	0	0	0	0	0	0	0
Bacteria	Bacteroidetes	Bacteroidetes_unclassified	Bacteroidetes_unclassified					0	0	0	0	0	0	0	0	0	0	0	0	0	0	0	0	0	0	0	0	0	0	0	0	0	0	0	0	0	0	0	0	0	0	0	0	0	0	0	0	0	0
Bacteria	Bacteroidetes	Bacteroidetes_unclassified	Bacteroidetes_unclassified	Bacteroidetes_unclassified				0	0	0	0	0	0	0	0	0	0	0	0	0	0	0	0	0	0	0	0	0	0	0	0	0	0	0	0	0	0	0	0	0	0	0	0	0	0	0	0	0	0
Bacteria	Bacteroidetes	Bacteroidetes_unclassified	Bacteroidetes_unclassified	Bacteroidetes_unclassified	Bacteroidetes_unclassified			0	0	0	0	0	0	0	0	0	0	0	0	0	0	0	0	0	0	0	0	0	0	0	0	0	0	0	0	0	0	0	0	0	0	0	0	0	0	0	0	0	0
Bacteria	Bacteroidetes	Bacteroidetes_unclassified	Bacteroidetes_unclassified	Bacteroidetes_unclassified	Bacteroidetes_unclassified	Bacteroidetes_bacterium_37_13	2|976|||||1895921	0	0	0	0	0	0	0	0	0	0	0	0	0	0	0	0	0	0	0	0	0	0	0	0	0	0	0	0	0	0	0	0	0	0	0	0	0	0	0	0	0	0
Bacteria	Bacteroidetes	Bacteroidia					2|976|200643	48.67513	48.67513	30.55137	60.66982	32.0799	17.62969	33.49604	16.69656	23.59993	39.78714	2.32754	1.92316	0	0	0	0.3464	3.28042	7.09223	8.57492	0.12912	0	6.8148	0	9.79256	2.68567	7.93397	15.18591	35.15435	6.61209	0.42424	0.45715	0.20496	4.61383	0.3185	0.23636	0.25967	40.5518	0.41269	5.0451	0	0	0
Bacteria	Bacteroidetes	Bacteroidia	Bacteroidales				2|976|200643|171549	48.67513	48.67513	30.55137	60.66982	32.0799	17.62969	33.49604	16.69656	23.59993	39.78714	2.32754	1.92316	0	0	0	0.3464	3.28042	7.09223	8.57492	0.12912	0	6.8148	0	9.79256	2.68567	7.93397	15.18591	35.15435	6.61209	0.42424	0.45715	0.20496	4.61383	0.3185	0.23636	0.25967	40.5518	0.41269	5.0451	0	0	0
Bacteria	Bacteroidetes	Bacteroidia	Bacteroidales	Bacteroidaceae			2|976|200643|171549|815	22.41945	22.41945	14.17322	31.38923	16.88819	8.32336	14.99382	7.71714	7.00433	17.79011	0.49647	0.31277	0	0	0	0	1.10188	0.55055	2.78182	0.12912	0	3.0345	0	5.44018	1.20694	7.42126	9.28469	22.18305	4.66368	0.39942	0.36974	0.18432	2.71594	0.1608	0.20103	0.15628	28.06501	0.25482	2.56509	0	0	0
Bacteria	Bacteroidetes	Bacteroidia	Bacteroidales	Bacteroidaceae	Bacteroides		2|976|200643|171549|815|816	22.41945	22.41945	14.17322	31.38923	16.88819	8.32336	14.99382	7.71714	7.00433	17.79011	0.49647	0.31277	0	0	0	0	1.10188	0.55055	2.78182	0.12912	0	3.0345	0	5.44018	1.20694	7.42126	9.28469	22.18305	4.66368	0.39942	0.36974	0.18432	2.71594	0.1608	0.20103	0.15628	28.06501	0.25482	2.56509	0	0	0
Bacteria	Bacteroidetes	Bacteroidia	Bacteroidales	Bacteroidaceae	Bacteroides	Bacteroides_caccae	2|976|200643|171549|815|816|47678	0	0	0.02849	0.02328	0.01242	0	0	0.00145	0	0	0	0	0	0	0	0	0	0	0	0	0	0	0	0	0.00043	0	0	0.02079	0	0	0	0	0	0	0	0	0	0	0	0	0	0
Bacteria	Bacteroidetes	Bacteroidia	Bacteroidales	Bacteroidaceae	Bacteroides	Bacteroides_cellulosilyticus	2|976|200643|171549|815|816|246787	0	0	0	0	0.00913	0	0	0	0	0	0	0	0	0	0	0	0	0	0	0	0	0	0	0	0.00244	0	0.04079	0	0	0	0	0	0	0	0	0	0	0	0	0	0	0
Bacteria	Bacteroidetes	Bacteroidia	Bacteroidales	Bacteroidaceae	Bacteroides	Bacteroides_clarus	2|976|200643|171549|815|816|626929	0.02779	0.02779	0.23524	0.01987	0.30538	0.00245	0	0.0003	0	0	0	0	0	0	0	0	0	0	0	0	0	0	0	0	0	0	0	0.33785	0.15898	0	0.00229	0.0006	0	0	0	0	0	0	0	0	0	0
Bacteria	Bacteroidetes	Bacteroidia	Bacteroidales	Bacteroidaceae	Bacteroides	Bacteroides_coprocola	2|976|200643|171549|815|816|310298	0	0	0	0	0	0	0	0	0	0	0	0	0	0	0	0	0	0	0	0	0	0	0	0	0	0	0	0	0	0	0	0	0	0	0	0	0	0	0	0	0	0
Bacteria	Bacteroidetes	Bacteroidia	Bacteroidales	Bacteroidaceae	Bacteroides	Bacteroides_coprophilus	2|976|200643|171549|815|816|387090	0	0	0	0	0	0	0	0	0	0	0	0	0	0	0	0	0	0	0	0	0	0	0	0	0	0	0	0	0	0	0	0	0	0	0	0	0	0	0	0	0	0
Bacteria	Bacteroidetes	Bacteroidia	Bacteroidales	Bacteroidaceae	Bacteroides	Bacteroides_coprosuis	2|976|200643|171549|815|816|151276	0.02556	0.02556	0	0	0.00693	0.00453	0	0	0	0	0	0	0	0	0	0	0	0	0	0	0	0	0	0	0.2205	5.91803	3.12498	0.01448	0.07786	0.39579	0.25768	0.13523	0.05583	0	0.19615	0.14608	0	0.15542	0.08098	0	0	0
Bacteria	Bacteroidetes	Bacteroidia	Bacteroidales	Bacteroidaceae	Bacteroides	Bacteroides_dorei	2|976|200643|171549|815|816|357276	0.80438	0.80438	0.99312	2.85708	0.82873	0.01789	0.02463	0.01159	0.66827	0.01732	0.1944	0.26159	0	0	0	0	1.10188	0.55055	2.78182	0	0	2.76478	0	3.83448	0.06598	0.12797	0.56543	0.33229	0.02574	0	0	0	0	0	0	0	0	0	0	0	0	0
Bacteria	Bacteroidetes	Bacteroidia	Bacteroidales	Bacteroidaceae	Bacteroides	Bacteroides_eggerthii	2|976|200643|171549|815|816|28111	1.4998	1.4998	1.09876	2.42581	1.5775	0.04117	0.06951	0.05136	0.04254	0.04218	0.01864	0	0	0	0	0	0	0	0	0	0	0	0	0	0.01934	0.05285	0.20425	0.34916	0.26673	0	0.00231	0.00024	0	0	0	0	3.74291	0	0.01438	0	0	0
Bacteria	Bacteroidetes	Bacteroidia	Bacteroidales	Bacteroidaceae	Bacteroides	Bacteroides_faecis	2|976|200643|171549|815|816|674529	0.07661	0.07661	0.04378	0.09603	0.09339	0.02224	0.02986	0.01511	0.14124	0.03162	0	0	0	0	0	0	0	0	0	0	0	0	0	0	0	0.02018	0.00606	0.17495	0.04626	0	0	0	0.00217	0	0	0	0.0135	0	0	0	0	0
Bacteria	Bacteroidetes	Bacteroidia	Bacteroidales	Bacteroidaceae	Bacteroides	Bacteroides_finegoldii	2|976|200643|171549|815|816|338188	0.00696	0.00696	0.01025	0	0.00045	0	0	0	0	0	0	0	0	0	0	0	0	0	0	0	0	0	0	0	0	0	0	0.02597	0	0	0	0	0	0	0	0	0	0	0	0	0	0
Bacteria	Bacteroidetes	Bacteroidia	Bacteroidales	Bacteroidaceae	Bacteroides	Bacteroides_fragilis	2|976|200643|171549|815|816|817	1.16619	1.16619	0.47558	0.7575	0.34198	0.93679	1.27762	0.84022	3.15624	1.01966	0	0	0	0	0	0	0	0	0	0	0	0	0	0	0.02728	0.65571	0.25942	0.7075	0.1677	0	0.00719	0.0007	0.07271	0.13959	0.00026	0.00171	0.30755	0.02608	0.24606	0	0	0
Bacteria	Bacteroidetes	Bacteroidia	Bacteroidales	Bacteroidaceae	Bacteroides	Bacteroides_graminisolvens	2|976|200643|171549|815|816|477666	0	0	0	0	0	0	0	0	0	0	0	0	0	0	0	0	0	0	0	0	0	0	0	0	0	0	0	0	0	0	0	0	0	0	0	0	0	0	0	0	0	0
Bacteria	Bacteroidetes	Bacteroidia	Bacteroidales	Bacteroidaceae	Bacteroides	Bacteroides_intestinalis	2|976|200643|171549|815|816|329854	0.01319	0.01319	0.02328	0.0886	0.10323	0	0	0	0	0	0	0	0	0	0	0	0	0	0	0	0	0	0	0	0	0.0149	0	0	0	0	0	0	0	0	0	0	0	0	0	0	0	0
Bacteria	Bacteroidetes	Bacteroidia	Bacteroidales	Bacteroidaceae	Bacteroides	Bacteroides_massiliensis	2|976|200643|171549|815|816|204516	0.08024	0.08024	0.23029	0.22527	0.30095	0.02059	0.01334	0.01139	0.0035	0.01103	0	0	0	0	0	0	0	0	0	0	0	0	0	0	0.00693	0.00117	0.1037	0.82117	0.00969	0	0	0	0	0	0	0	0	0	0	0	0	0
Bacteria	Bacteroidetes	Bacteroidia	Bacteroidales	Bacteroidaceae	Bacteroides	Bacteroides_ovatus	2|976|200643|171549|815|816|28116	0	0	0	0	0	0	0.0141	0	0	0	0	0	0	0	0	0	0	0	0	0	0	0	0	0	0	0	0	0.00285	0	0	0	0	0	0	0	0	0	0	0	0	0	0
Bacteria	Bacteroidetes	Bacteroidia	Bacteroidales	Bacteroidaceae	Bacteroides	Bacteroides_plebeius	2|976|200643|171549|815|816|310297	0	0	0	0	0	0	0	0	0	0	0	0	0	0	0	0	0	0	0	0	0	0	0	0	0	0	0	0	0	0	0	0	0	0	0	0	0	0	0	0	0	0
Bacteria	Bacteroidetes	Bacteroidia	Bacteroidales	Bacteroidaceae	Bacteroides	Bacteroides_pyogenes	2|976|200643|171549|815|816|310300	0	0	0	0	0	0	0	0	0	0	0	0	0	0	0	0	0	0	0	0	0	0	0	0	0	0	0	0	0	0	0	0	0	0	0	0	0	0	0	0	0	0
Bacteria	Bacteroidetes	Bacteroidia	Bacteroidales	Bacteroidaceae	Bacteroides	Bacteroides_reticulotermitis	2|976|200643|171549|815|816|1133319	0	0	0	0	0	0.0027	0.00168	0.00421	0	0	0	0	0	0	0	0	0	0	0	0	0	0	0	0	0	0	0	0	0	0	0	0	0	0.00222	0	0	0	0	0	0	0	0
Bacteria	Bacteroidetes	Bacteroidia	Bacteroidales	Bacteroidaceae	Bacteroides	Bacteroides_salyersiae	2|976|200643|171549|815|816|291644	0.99456	0.99456	0.27048	0.40774	0.22297	0	0	0	0.09027	0	0	0	0	0	0	0	0	0	0	0	0	0	0	0	0.01249	0.00806	0.01244	0.02095	0.02986	0	0	0	0	0	0	0	0	0	0	0	0	0
Bacteria	Bacteroidetes	Bacteroidia	Bacteroidales	Bacteroidaceae	Bacteroides	Bacteroides_sp_CAG_144	2|976|200643|171549|815|816|1262736	1.39877	1.39877	1.00418	2.72368	0.98551	0.53153	0.9588	0.46637	0.26729	0.74831	0	0	0	0	0	0	0	0	0	0	0	0	0	0	0.00725	0	0.31151	0.24337	0.01307	0	0	0	0	0	0	0	0.17567	0	0.02053	0	0	0
Bacteria	Bacteroidetes	Bacteroidia	Bacteroidales	Bacteroidaceae	Bacteroides	Bacteroides_sp_CAG_598	2|976|200643|171549|815|816|1262743	0	0	0	0	0	0	0	0	0	0	0	0	0	0	0	0	0	0	0	0	0	0	0	0	0	0	0	0	0	0	0	0	0	0	0	0	0	0	0	0	0	0
Bacteria	Bacteroidetes	Bacteroidia	Bacteroidales	Bacteroidaceae	Bacteroides	Bacteroides_stercorirosoris	2|976|200643|171549|815|816|871324	0.00426	0.00426	0.01741	0.00515	0.05997	0	0	0	0.07885	0	0	0	0	0	0	0	0	0	0	0	0	0	0	0	0	0	0.01013	0	0	0	0	0	0.16117	0	0	0	0	0	0	0	0	0
Bacteria	Bacteroidetes	Bacteroidia	Bacteroidales	Bacteroidaceae	Bacteroides	Bacteroides_stercoris	2|976|200643|171549|815|816|46506	0	0	0	0	0	0	0	0	0	0	0	0	0	0	0	0	0	0	0	0	0	0	0	0	0	0	0	0	0	0	0	0	0	0	0	0	0	0	0	0	0	0
Bacteria	Bacteroidetes	Bacteroidia	Bacteroidales	Bacteroidaceae	Bacteroides	Bacteroides_thetaiotaomicron	2|976|200643|171549|815|816|818	0	0	0	0	0.01127	0	0	0	0	0	0	0	0	0	0	0	0	0	0	0	0	0	0	0	0.03902	0	0	0	0	0	0	0	0	0	0	0	0	0	0	0	0	0
Bacteria	Bacteroidetes	Bacteroidia	Bacteroidales	Bacteroidaceae	Bacteroides	Bacteroides_uniformis	2|976|200643|171549|815|816|820	13.59376	13.59376	5.9083	19.44267	8.82696	4.23848	9.26623	4.43301	2.12336	12.43182	0.28343	0.05117	0	0	0	0	0	0	0	0.12912	0	0.26973	0	1.6057	0.6743	0.28132	3.94357	8.64219	1.80262	0.00114	0.03457	0.01753	2.39127	0.01762	0.00462	0.00849	19.13999	0.05116	1.58186	0	0	0
Bacteria	Bacteroidetes	Bacteroidia	Bacteroidales	Bacteroidaceae	Bacteroides	Bacteroides_vulgatus	2|976|200643|171549|815|816|821	2.67591	2.67591	3.70953	2.22599	3.11809	2.47613	3.27148	1.85439	0.35105	3.44887	0	0	0	0	0	0	0	0	0	0	0	0	0	0	0.13088	0.31996	0.68396	10.45514	2.01763	0.00248	0.0657	0.03002	0	0	0	0	4.67268	0.02216	0.61872	0	0	0
Bacteria	Bacteroidetes	Bacteroidia	Bacteroidales	Bacteroidaceae	Bacteroides	Bacteroides_xylanisolvens	2|976|200643|171549|815|816|371601	0.05147	0.05147	0.12454	0.09057	0.08334	0.02886	0.06655	0.02776	0.08173	0.0393	0	0	0	0	0	0	0	0	0	0	0	0	0	0	8e-05	0.0211	0.01845	0.03439	0.04753	0	0	0	0.03279	0.00137	0	0	0.01271	0	0.00256	0	0	0
Bacteria	Bacteroidetes	Bacteroidia	Bacteroidales	Bacteroidales_unclassified				0	0	0	0	0	0	0	0	0	0	0	0	0	0	0	0	0	0	0	0	0	0	0	0	0	0	0	0	0	0	0	0	0	0	0	0	0	0	0	0	0	0
Bacteria	Bacteroidetes	Bacteroidia	Bacteroidales	Bacteroidales_unclassified	Bacteroidales_unclassified			0	0	0	0	0	0	0	0	0	0	0	0	0	0	0	0	0	0	0	0	0	0	0	0	0	0	0	0	0	0	0	0	0	0	0	0	0	0	0	0	0	0
Bacteria	Bacteroidetes	Bacteroidia	Bacteroidales	Bacteroidales_unclassified	Bacteroidales_unclassified	Bacteroidales_bacterium_KA00344	2|976|200643|171549|||1497954	0	0	0	0	0	0	0	0	0	0	0	0	0	0	0	0	0	0	0	0	0	0	0	0	0	0	0	0	0	0	0	0	0	0	0	0	0	0	0	0	0	0
Bacteria	Bacteroidetes	Bacteroidia	Bacteroidales	Barnesiellaceae			2|976|200643|171549|2005519	3.0275	3.0275	1.35579	2.41586	1.31849	5.4085	11.71867	4.64364	2.50114	14.44029	0.12005	0	0	0	0	0	0	0	0	0	0	0	0	0	0.08457	0.13071	0.36615	0.58782	0.05802	0	0.01272	0.0033	1.28407	0.0135	0	0.00071	8.90249	0.1296	1.65277	0	0	0
Bacteria	Bacteroidetes	Bacteroidia	Bacteroidales	Barnesiellaceae	Barnesiella		2|976|200643|171549|2005519|397864	2.45474	2.45474	0.81676	1.23158	1.02778	4.72006	10.69493	4.10016	2.26022	13.38281	0.12005	0	0	0	0	0	0	0	0	0	0	0	0	0	0.05774	0.09709	0.32358	0.58782	0.05596	0	0.01272	0.0033	1.26816	0.0135	0	0.00071	8.40307	0.11903	1.59266	0	0	0
Bacteria	Bacteroidetes	Bacteroidia	Bacteroidales	Barnesiellaceae	Barnesiella	Barnesiella_intestinihominis	2|976|200643|171549|2005519|397864|487174	2.45474	2.45474	0.81676	1.23158	1.02778	4.72006	10.69493	4.10016	2.26022	13.38281	0.12005	0	0	0	0	0	0	0	0	0	0	0	0	0	0.05774	0.09709	0.32358	0.58782	0.05596	0	0.01272	0.0033	1.26816	0.0135	0	0.00071	8.40307	0.11903	1.59266	0	0	0
Bacteria	Bacteroidetes	Bacteroidia	Bacteroidales	Barnesiellaceae	Barnesiella	Barnesiella_sp_An22	2|976|200643|171549|2005519|397864|1965590	0	0	0	0	0	0	0	0	0	0	0	0	0	0	0	0	0	0	0	0	0	0	0	0	0	0	0	0	0	0	0	0	0	0	0	0	0	0	0	0	0	0
Bacteria	Bacteroidetes	Bacteroidia	Bacteroidales	Barnesiellaceae	Barnesiella	Barnesiella_viscericola	2|976|200643|171549|2005519|397864|397865	0	0	0	0	0	0	0	0	0	0	0	0	0	0	0	0	0	0	0	0	0	0	0	0	0	0	0	0	0	0	0	0	0	0	0	0	0	0	0	0	0	0
Bacteria	Bacteroidetes	Bacteroidia	Bacteroidales	Barnesiellaceae	Coprobacter		2|976|200643|171549|2005519|1348911	0.57276	0.57276	0.53903	1.18428	0.29072	0.68844	1.02374	0.54348	0.24092	1.05748	0	0	0	0	0	0	0	0	0	0	0	0	0	0	0.02683	0.03362	0.04257	0	0.00206	0	0	0	0.01591	0	0	0	0.49942	0.01058	0.06012	0	0	0
Bacteria	Bacteroidetes	Bacteroidia	Bacteroidales	Barnesiellaceae	Coprobacter	Coprobacter_fastidiosus	2|976|200643|171549|2005519|1348911|1099853	0.57276	0.57276	0.53903	1.18428	0.29072	0.68844	1.02374	0.54348	0.24092	1.05748	0	0	0	0	0	0	0	0	0	0	0	0	0	0	0.02683	0.03362	0.04257	0	0.00206	0	0	0	0.01591	0	0	0	0.49942	0.01058	0.06012	0	0	0
Bacteria	Bacteroidetes	Bacteroidia	Bacteroidales	Barnesiellaceae	Coprobacter	Coprobacter_secundus	2|976|200643|171549|2005519|1348911|1501392	0	0	0	0	0	0	0	0	0	0	0	0	0	0	0	0	0	0	0	0	0	0	0	0	0	0	0	0	0	0	0	0	0	0	0	0	0	0	0	0	0	0
Bacteria	Bacteroidetes	Bacteroidia	Bacteroidales	Dysgonamonadaceae			2|976|200643|171549|2005520	0	0	0	0	0	0	0	0	0	0	0	0	0	0	0	0	0	0	0	0	0	0	0	0	0	0	0	0	0	0	0	0	0	0.00223	0	0	0	0	0	0	0	0
Bacteria	Bacteroidetes	Bacteroidia	Bacteroidales	Dysgonamonadaceae	Proteiniphilum		2|976|200643|171549|2005520|294702	0	0	0	0	0	0	0	0	0	0	0	0	0	0	0	0	0	0	0	0	0	0	0	0	0	0	0	0	0	0	0	0	0	0.00223	0	0	0	0	0	0	0	0
Bacteria	Bacteroidetes	Bacteroidia	Bacteroidales	Dysgonamonadaceae	Proteiniphilum	Proteiniphilum_saccharofermentans	2|976|200643|171549|2005520|294702|1642647	0	0	0	0	0	0	0	0	0	0	0	0	0	0	0	0	0	0	0	0	0	0	0	0	0	0	0	0	0	0	0	0	0	0.00223	0	0	0	0	0	0	0	0
Bacteria	Bacteroidetes	Bacteroidia	Bacteroidales	Odoribacteraceae			2|976|200643|171549|1853231	1.68937	1.68937	0.60955	0.78277	0.41194	0.07562	0.29999	0.08167	0.41588	0.37802	0	0	0	0	0	0	0	0	0	0	0	0	0	0	0.01171	0.00162	0.04561	0.31455	0.09315	0	0	0	0.02197	0	0	0	0	0	0.00424	0	0	0
Bacteria	Bacteroidetes	Bacteroidia	Bacteroidales	Odoribacteraceae	Butyricimonas		2|976|200643|171549|1853231|574697	0.41139	0.41139	0.13838	0.12853	0.08598	0	0	0	0	0	0	0	0	0	0	0	0	0	0	0	0	0	0	0	0.00033	0	0.01577	0.23118	0.01307	0	0	0	0	0	0	0	0	0	0	0	0	0
Bacteria	Bacteroidetes	Bacteroidia	Bacteroidales	Odoribacteraceae	Butyricimonas	Butyricimonas_synergistica	2|976|200643|171549|1853231|574697|544644	0.03251	0.03251	0.01062	0.01971	0.00884	0	0	0	0	0	0	0	0	0	0	0	0	0	0	0	0	0	0	0	0	0	0.00276	0.02562	0.0015	0	0	0	0	0	0	0	0	0	0	0	0	0
Bacteria	Bacteroidetes	Bacteroidia	Bacteroidales	Odoribacteraceae	Butyricimonas	Butyricimonas_virosa	2|976|200643|171549|1853231|574697|544645	0.37888	0.37888	0.12776	0.10882	0.07715	0	0	0	0	0	0	0	0	0	0	0	0	0	0	0	0	0	0	0	0.00033	0	0.01301	0.20556	0.01157	0	0	0	0	0	0	0	0	0	0	0	0	0
Bacteria	Bacteroidetes	Bacteroidia	Bacteroidales	Odoribacteraceae	Odoribacter		2|976|200643|171549|1853231|283168	1.27798	1.27798	0.47117	0.65424	0.32596	0.07562	0.29999	0.08167	0.41588	0.37802	0	0	0	0	0	0	0	0	0	0	0	0	0	0	0.01138	0.00162	0.02984	0.08337	0.08008	0	0	0	0.02197	0	0	0	0	0	0.00424	0	0	0
Bacteria	Bacteroidetes	Bacteroidia	Bacteroidales	Odoribacteraceae	Odoribacter	Odoribacter_splanchnicus	2|976|200643|171549|1853231|283168|28118	1.27798	1.27798	0.47117	0.65424	0.32596	0.07562	0.29999	0.08167	0.41588	0.37802	0	0	0	0	0	0	0	0	0	0	0	0	0	0	0.01138	0.00162	0.02984	0.08337	0.08008	0	0	0	0.02197	0	0	0	0	0	0.00424	0	0	0
Bacteria	Bacteroidetes	Bacteroidia	Bacteroidales	Porphyromonadaceae			2|976|200643|171549|171551	0	0	0	0	0	0	0	0	0	0	0	0	0	0	0	0.3464	0	0	0	0	0	0	0	0	0	0.00059	0.00772	0	0	0.0008	0.00196	0	0.02131	0.04372	0.00254	0.03091	0	0.00311	0.00121	0	0	0
Bacteria	Bacteroidetes	Bacteroidia	Bacteroidales	Porphyromonadaceae	Fermentimonas		2|976|200643|171549|171551|1784836	0	0	0	0	0	0	0	0	0	0	0	0	0	0	0	0.34039	0	0	0	0	0	0	0	0	0	0	0	0	0	0	0	0	0.00074	0.01157	0	0.00545	0	0	0	0	0	0
Bacteria	Bacteroidetes	Bacteroidia	Bacteroidales	Porphyromonadaceae	Fermentimonas	Fermentimonas_caenicola	2|976|200643|171549|171551|1784836|1562970	0	0	0	0	0	0	0	0	0	0	0	0	0	0	0	0.34039	0	0	0	0	0	0	0	0	0	0	0	0	0	0	0	0	0.00074	0.01157	0	0.00545	0	0	0	0	0	0
Bacteria	Bacteroidetes	Bacteroidia	Bacteroidales	Porphyromonadaceae	Petrimonas		2|976|200643|171549|171551|307628	0	0	0	0	0	0	0	0	0	0	0	0	0	0	0	0.00601	0	0	0	0	0	0	0	0	0	0.00059	0.00772	0	0	0.0008	0.00196	0	0.02057	0.03216	0.00254	0.02546	0	0.00311	0.00121	0	0	0
Bacteria	Bacteroidetes	Bacteroidia	Bacteroidales	Porphyromonadaceae	Petrimonas	Petrimonas_mucosa	2|976|200643|171549|171551|307628|1642646	0	0	0	0	0	0	0	0	0	0	0	0	0	0	0	0.00601	0	0	0	0	0	0	0	0	0	0.00059	0.00772	0	0	0.0008	0.00196	0	0.02057	0.03216	0.00254	0.02546	0	0.00311	0.00121	0	0	0
Bacteria	Bacteroidetes	Bacteroidia	Bacteroidales	Prevotellaceae			2|976|200643|171549|171552	0	0	0	0	0	0	0	0	0	0	0	0	0	0	0	0	0	0	0	0	0	0	0	0	0	0	0	0	0	0	0	0	0	0	0	0	0	0	0	0	0	0
Bacteria	Bacteroidetes	Bacteroidia	Bacteroidales	Prevotellaceae	Alloprevotella		2|976|200643|171549|171552|1283313	0	0	0	0	0	0	0	0	0	0	0	0	0	0	0	0	0	0	0	0	0	0	0	0	0	0	0	0	0	0	0	0	0	0	0	0	0	0	0	0	0	0
Bacteria	Bacteroidetes	Bacteroidia	Bacteroidales	Prevotellaceae	Alloprevotella	Alloprevotella_rava	2|976|200643|171549|171552|1283313|671218	0	0	0	0	0	0	0	0	0	0	0	0	0	0	0	0	0	0	0	0	0	0	0	0	0	0	0	0	0	0	0	0	0	0	0	0	0	0	0	0	0	0
Bacteria	Bacteroidetes	Bacteroidia	Bacteroidales	Prevotellaceae	Alloprevotella	Alloprevotella_tannerae	2|976|200643|171549|171552|1283313|76122	0	0	0	0	0	0	0	0	0	0	0	0	0	0	0	0	0	0	0	0	0	0	0	0	0	0	0	0	0	0	0	0	0	0	0	0	0	0	0	0	0	0
Bacteria	Bacteroidetes	Bacteroidia	Bacteroidales	Prevotellaceae	Paraprevotella		2|976|200643|171549|171552|577309	0	0	0	0	0	0	0	0	0	0	0	0	0	0	0	0	0	0	0	0	0	0	0	0	0	0	0	0	0	0	0	0	0	0	0	0	0	0	0	0	0	0
Bacteria	Bacteroidetes	Bacteroidia	Bacteroidales	Prevotellaceae	Paraprevotella	Paraprevotella_xylaniphila	2|976|200643|171549|171552|577309|454155	0	0	0	0	0	0	0	0	0	0	0	0	0	0	0	0	0	0	0	0	0	0	0	0	0	0	0	0	0	0	0	0	0	0	0	0	0	0	0	0	0	0
Bacteria	Bacteroidetes	Bacteroidia	Bacteroidales	Prevotellaceae	Prevotella		2|976|200643|171549|171552|838	0	0	0	0	0	0	0	0	0	0	0	0	0	0	0	0	0	0	0	0	0	0	0	0	0	0	0	0	0	0	0	0	0	0	0	0	0	0	0	0	0	0
Bacteria	Bacteroidetes	Bacteroidia	Bacteroidales	Prevotellaceae	Prevotella	Prevotella_copri	2|976|200643|171549|171552|838|165179	0	0	0	0	0	0	0	0	0	0	0	0	0	0	0	0	0	0	0	0	0	0	0	0	0	0	0	0	0	0	0	0	0	0	0	0	0	0	0	0	0	0
Bacteria	Bacteroidetes	Bacteroidia	Bacteroidales	Prevotellaceae	Prevotella	Prevotella_melaninogenica	2|976|200643|171549|171552|838|28132	0	0	0	0	0	0	0	0	0	0	0	0	0	0	0	0	0	0	0	0	0	0	0	0	0	0	0	0	0	0	0	0	0	0	0	0	0	0	0	0	0	0
Bacteria	Bacteroidetes	Bacteroidia	Bacteroidales	Prevotellaceae	Prevotella	Prevotella_sp_AM42_24	2|976|200643|171549|171552|838|2293125	0	0	0	0	0	0	0	0	0	0	0	0	0	0	0	0	0	0	0	0	0	0	0	0	0	0	0	0	0	0	0	0	0	0	0	0	0	0	0	0	0	0
Bacteria	Bacteroidetes	Bacteroidia	Bacteroidales	Prevotellaceae	Prevotella	Prevotella_sp_CAG_1058	2|976|200643|171549|171552|838|1262918	0	0	0	0	0	0	0	0	0	0	0	0	0	0	0	0	0	0	0	0	0	0	0	0	0	0	0	0	0	0	0	0	0	0	0	0	0	0	0	0	0	0
Bacteria	Bacteroidetes	Bacteroidia	Bacteroidales	Prevotellaceae	Prevotella	Prevotella_sp_CAG_1124	2|976|200643|171549|171552|838|1262920	0	0	0	0	0	0	0	0	0	0	0	0	0	0	0	0	0	0	0	0	0	0	0	0	0	0	0	0	0	0	0	0	0	0	0	0	0	0	0	0	0	0
Bacteria	Bacteroidetes	Bacteroidia	Bacteroidales	Prevotellaceae	Prevotella	Prevotella_sp_CAG_1320	2|976|200643|171549|171552|838|1262922	0	0	0	0	0	0	0	0	0	0	0	0	0	0	0	0	0	0	0	0	0	0	0	0	0	0	0	0	0	0	0	0	0	0	0	0	0	0	0	0	0	0
Bacteria	Bacteroidetes	Bacteroidia	Bacteroidales	Prevotellaceae	Prevotella	Prevotella_sp_CAG_5226	2|976|200643|171549|171552|838|1262930	0	0	0	0	0	0	0	0	0	0	0	0	0	0	0	0	0	0	0	0	0	0	0	0	0	0	0	0	0	0	0	0	0	0	0	0	0	0	0	0	0	0
Bacteria	Bacteroidetes	Bacteroidia	Bacteroidales	Prevotellaceae	Prevotella	Prevotella_sp_CAG_617	2|976|200643|171549|171552|838|1262933	0	0	0	0	0	0	0	0	0	0	0	0	0	0	0	0	0	0	0	0	0	0	0	0	0	0	0	0	0	0	0	0	0	0	0	0	0	0	0	0	0	0
Bacteria	Bacteroidetes	Bacteroidia	Bacteroidales	Prevotellaceae	Prevotella	Prevotella_sp_CAG_755	2|976|200643|171549|171552|838|1262935	0	0	0	0	0	0	0	0	0	0	0	0	0	0	0	0	0	0	0	0	0	0	0	0	0	0	0	0	0	0	0	0	0	0	0	0	0	0	0	0	0	0
Bacteria	Bacteroidetes	Bacteroidia	Bacteroidales	Prevotellaceae	Prevotella	Prevotella_sp_CAG_891	2|976|200643|171549|171552|838|1262937	0	0	0	0	0	0	0	0	0	0	0	0	0	0	0	0	0	0	0	0	0	0	0	0	0	0	0	0	0	0	0	0	0	0	0	0	0	0	0	0	0	0
Bacteria	Bacteroidetes	Bacteroidia	Bacteroidales	Prevotellaceae	Prevotella	Prevotella_sp_MGM2	2|976|200643|171549|171552|838|2033406	0	0	0	0	0	0	0	0	0	0	0	0	0	0	0	0	0	0	0	0	0	0	0	0	0	0	0	0	0	0	0	0	0	0	0	0	0	0	0	0	0	0
Bacteria	Bacteroidetes	Bacteroidia	Bacteroidales	Prevotellaceae	Prevotella	Prevotella_stercorea	2|976|200643|171549|171552|838|363265	0	0	0	0	0	0	0	0	0	0	0	0	0	0	0	0	0	0	0	0	0	0	0	0	0	0	0	0	0	0	0	0	0	0	0	0	0	0	0	0	0	0
Bacteria	Bacteroidetes	Bacteroidia	Bacteroidales	Rikenellaceae			2|976|200643|171549|171550	14.5742	14.5742	10.91744	22.63913	11.25526	3.04239	4.35184	3.31872	10.34669	5.34747	1.27157	0.08293	0	0	0	0	0	0	0	0	0	0	0	1.55103	1.17577	0.07269	5.00794	7.18515	1.42525	0.02402	0.06849	0.01518	0.30018	0.0876	0.03063	0.06283	1.99953	0.01964	0.68062	0	0	0
Bacteria	Bacteroidetes	Bacteroidia	Bacteroidales	Rikenellaceae	Alistipes		2|976|200643|171549|171550|239759	14.5742	14.5742	10.91744	22.63913	11.25526	3.04239	4.35184	3.31872	10.34669	5.34747	1.27157	0.08293	0	0	0	0	0	0	0	0	0	0	0	1.55103	1.17577	0.07269	5.00794	7.18515	1.42525	0.02402	0.06849	0.01518	0.30018	0.0876	0.03063	0.06283	1.99953	0.01964	0.68062	0	0	0
Bacteria	Bacteroidetes	Bacteroidia	Bacteroidales	Rikenellaceae	Alistipes	Alistipes_finegoldii	2|976|200643|171549|171550|239759|214856	0	0	0	0	0	0	0	0	0	0	0	0	0	0	0	0	0	0	0	0	0	0	0	0	0	0	0	0	0	0	0	0	0	0	0	0	0	0	0	0	0	0
Bacteria	Bacteroidetes	Bacteroidia	Bacteroidales	Rikenellaceae	Alistipes	Alistipes_indistinctus	2|976|200643|171549|171550|239759|626932	0	0	0	0	0	0	0	0	0	0	0	0	0	0	0	0	0	0	0	0	0	0	0	0	0	0	0	0.01012	0	0	0	0	0	0	0	0	0	0	0	0	0	0
Bacteria	Bacteroidetes	Bacteroidia	Bacteroidales	Rikenellaceae	Alistipes	Alistipes_inops	2|976|200643|171549|171550|239759|1501391	2.18385	2.18385	1.99301	3.49351	2.35537	0.15996	0.40923	0.21256	0.46338	0.37596	0.57228	0	0	0	0	0	0	0	0	0	0	0	0	0.9956	0.58628	0.03228	1.73845	1.39772	0.33821	0.0227	0.05612	0.01008	0.03435	0.00935	0	0	0.01033	0.00028	0.11901	0	0	0
Bacteria	Bacteroidetes	Bacteroidia	Bacteroidales	Rikenellaceae	Alistipes	Alistipes_onderdonkii	2|976|200643|171549|171550|239759|328813	0	0	0	0	0	0	0	0	0	0	0	0	0	0	0	0	0	0	0	0	0	0	0	0	0	0	0	0	0	0	0	0	0	0	0	0	0	0	0	0	0	0
Bacteria	Bacteroidetes	Bacteroidia	Bacteroidales	Rikenellaceae	Alistipes	Alistipes_putredinis	2|976|200643|171549|171550|239759|28117	0.06936	0.06936	0.06621	0.12681	0.05862	0.06911	0.13222	0.0609	0.05291	0.14804	0	0	0	0	0	0	0	0	0	0	0	0	0	0	0.0046	0	0.01554	0.08685	0.00738	0	0	0	0.00315	0	0	0	0.04958	0	0.03766	0	0	0
Bacteria	Bacteroidetes	Bacteroidia	Bacteroidales	Rikenellaceae	Alistipes	Alistipes_shahii	2|976|200643|171549|171550|239759|328814	0	0	0	0	0	0	0	0	0	0	0	0	0	0	0	0	0	0	0	0	0	0	0	0	0	0	0	0	0	0	0	0	0	0	0	0	0	0	0	0	0	0
Bacteria	Bacteroidetes	Bacteroidia	Bacteroidales	Rikenellaceae	Alistipes	Alistipes_sp_An66	2|976|200643|171549|171550|239759|1965650	9.601	9.601	6.11201	14.36132	6.68947	0.80669	0.63669	0.83479	6.66086	0.60235	0.38536	0.08293	0	0	0	0	0	0	0	0	0	0	0	0.55543	0.46742	0.02493	2.72147	4.21632	0.57774	0.00054	0.00789	0.00349	0.10043	0.012	0.01093	0.01949	0.07936	0	0.02182	0	0	0
Bacteria	Bacteroidetes	Bacteroidia	Bacteroidales	Rikenellaceae	Alistipes	Alistipes_sp_CHKCI003	2|976|200643|171549|171550|239759|1780376	2.72	2.72	2.74621	4.65749	2.15179	2.00664	3.17371	2.21047	3.16954	4.22113	0.31393	0	0	0	0	0	0	0	0	0	0	0	0	0	0.11747	0.01548	0.53248	1.47414	0.50192	0.00078	0.00448	0.00162	0.16226	0.06625	0.0197	0.04334	1.86026	0.01936	0.50213	0	0	0
Bacteria	Bacteroidetes	Bacteroidia	Bacteroidales	Rikenellaceae	Alistipes	Alistipes_timonensis	2|976|200643|171549|171550|239759|1465754	0	0	0	0	0	0	0	0	0	0	0	0	0	0	0	0	0	0	0	0	0	0	0	0	0	0	0	0	0	0	0	0	0	0	0	0	0	0	0	0	0	0
Bacteria	Bacteroidetes	Bacteroidia	Bacteroidales	Rikenellaceae	Rikenella		2|976|200643|171549|171550|28138	0	0	0	0	0	0	0	0	0	0	0	0	0	0	0	0	0	0	0	0	0	0	0	0	0	0	0	0	0	0	0	0	0	0	0	0	0	0	0	0	0	0
Bacteria	Bacteroidetes	Bacteroidia	Bacteroidales	Rikenellaceae	Rikenella	Rikenella_microfusus	2|976|200643|171549|171550|28138|28139	0	0	0	0	0	0	0	0	0	0	0	0	0	0	0	0	0	0	0	0	0	0	0	0	0	0	0	0	0	0	0	0	0	0	0	0	0	0	0	0	0	0
Bacteria	Bacteroidetes	Bacteroidia	Bacteroidales	Tannerellaceae			2|976|200643|171549|2005525	6.96461	6.96461	3.49536	3.44283	2.20602	0.77982	2.13172	0.93539	3.33189	1.83124	0.43945	1.52746	0	0	0	0	2.17854	6.54168	5.7931	0	0	3.7803	0	2.80135	0.2067	0.30709	0.4738	4.88378	0.37199	0	0.00424	0.00216	0.27036	0.01065	0.00216	0.00893	1.58476	0.00551	0.14116	0	0	0
Bacteria	Bacteroidetes	Bacteroidia	Bacteroidales	Tannerellaceae	Parabacteroides		2|976|200643|171549|2005525|375288	6.96461	6.96461	3.49536	3.44283	2.20602	0.77982	2.13172	0.93539	3.33189	1.83124	0.43945	1.52746	0	0	0	0	2.17854	6.54168	5.7931	0	0	3.7803	0	2.80135	0.2067	0.30709	0.4738	4.88378	0.37199	0	0.00424	0.00216	0.27036	0.01065	0.00216	0.00893	1.58476	0.00551	0.14116	0	0	0
Bacteria	Bacteroidetes	Bacteroidia	Bacteroidales	Tannerellaceae	Parabacteroides	Parabacteroides_distasonis	2|976|200643|171549|2005525|375288|823	0.5564	0.5564	0.94207	1.52253	1.12338	0.00175	0.01448	0.00448	0.42773	0.01407	0	0	0	0	0	0	0	0	0	0	0	0	0	0	0.04801	0.15153	0.25773	3.22515	0.25455	0	0.00118	0.00163	0.16457	0	0	0	0.04041	0	0	0	0	0
Bacteria	Bacteroidetes	Bacteroidia	Bacteroidales	Tannerellaceae	Parabacteroides	Parabacteroides_goldsteinii	2|976|200643|171549|2005525|375288|328812	0	0	0	0	0	0	0	0	0	0	0	0	0	0	0	0	0	0	0	0	0	0	0	0	0	0	0	0	0	0	0	0	0	0	0	0	0	0	0	0	0	0
Bacteria	Bacteroidetes	Bacteroidia	Bacteroidales	Tannerellaceae	Parabacteroides	Parabacteroides_johnsonii	2|976|200643|171549|2005525|375288|387661	6.39195	6.39195	2.38818	1.9203	1.05023	0.77652	2.11198	0.9295	2.90416	1.81527	0.43945	1.52746	0	0	0	0	2.17854	6.54168	5.7931	0	0	3.7803	0	2.80135	0.15868	0.15556	0.21607	0.66409	0.07411	0	0.00215	0	0.10579	0.01065	0.00216	0.00893	1.54435	0.00551	0.14116	0	0	0
Bacteria	Bacteroidetes	Bacteroidia	Bacteroidales	Tannerellaceae	Parabacteroides	Parabacteroides_merdae	2|976|200643|171549|2005525|375288|46503	0.01626	0.01626	0.1614	0	0.03129	0.00156	0.00526	0.00141	0	0.0019	0	0	0	0	0	0	0	0	0	0	0	0	0	0	0	0	0	0.99454	0.04333	0	0.00092	0.00053	0	0	0	0	0	0	0	0	0	0
Bacteria	Bacteroidetes	Bacteroidia	Bacteroidales	Tannerellaceae	Parabacteroides	Parabacteroides_sp_CAG_409	2|976|200643|171549|2005525|375288|1262913	0	0	0.00371	0	0.00112	0	0	0	0	0	0	0	0	0	0	0	0	0	0	0	0	0	0	0	0	0	0	0	0	0	0	0	0	0	0	0	0	0	0	0	0	0
Bacteria	Bacteroidetes	Bacteroidia	Marinilabiliales				2|976|200643|1970189	0	0	0	0	0	0	0	0	0	0	0	0	0	0	0	0	0	0	0	0	0	0	0	0	0	0	0	0	0	0	0	0	0	0	0	0	0	0	0	0	0	0
Bacteria	Bacteroidetes	Bacteroidia	Marinilabiliales	Prolixibacteraceae			2|976|200643|1970189|1471398	0	0	0	0	0	0	0	0	0	0	0	0	0	0	0	0	0	0	0	0	0	0	0	0	0	0	0	0	0	0	0	0	0	0	0	0	0	0	0	0	0	0
Bacteria	Bacteroidetes	Bacteroidia	Marinilabiliales	Prolixibacteraceae	Mariniphaga		2|976|200643|1970189|1471398|1573806	0	0	0	0	0	0	0	0	0	0	0	0	0	0	0	0	0	0	0	0	0	0	0	0	0	0	0	0	0	0	0	0	0	0	0	0	0	0	0	0	0	0
Bacteria	Bacteroidetes	Bacteroidia	Marinilabiliales	Prolixibacteraceae	Mariniphaga	Mariniphaga_sediminis	2|976|200643|1970189|1471398|1573806|1628158	0	0	0	0	0	0	0	0	0	0	0	0	0	0	0	0	0	0	0	0	0	0	0	0	0	0	0	0	0	0	0	0	0	0	0	0	0	0	0	0	0	0
Bacteria	Bacteroidetes	Bacteroidia	Marinilabiliales	Prolixibacteraceae	Sunxiuqinia		2|976|200643|1970189|1471398|1254401	0	0	0	0	0	0	0	0	0	0	0	0	0	0	0	0	0	0	0	0	0	0	0	0	0	0	0	0	0	0	0	0	0	0	0	0	0	0	0	0	0	0
Bacteria	Bacteroidetes	Bacteroidia	Marinilabiliales	Prolixibacteraceae	Sunxiuqinia	Sunxiuqinia_dokdonensis	2|976|200643|1970189|1471398|1254401|1409788	0	0	0	0	0	0	0	0	0	0	0	0	0	0	0	0	0	0	0	0	0	0	0	0	0	0	0	0	0	0	0	0	0	0	0	0	0	0	0	0	0	0
Bacteria	Bacteroidetes	Chitinophagia					2|976|1853228	0	0	0	0	0	0	0	0	0	0	0	0	0.17043	0	0	0	0	0	0	0	0	0	0	0	0	0	0	0	0	0	0	0	0	0	0	0	0	0	0	0	0	0
Bacteria	Bacteroidetes	Chitinophagia	Chitinophagales				2|976|1853228|1853229	0	0	0	0	0	0	0	0	0	0	0	0	0.17043	0	0	0	0	0	0	0	0	0	0	0	0	0	0	0	0	0	0	0	0	0	0	0	0	0	0	0	0	0
Bacteria	Bacteroidetes	Chitinophagia	Chitinophagales	Chitinophagaceae			2|976|1853228|1853229|563835	0	0	0	0	0	0	0	0	0	0	0	0	0.17043	0	0	0	0	0	0	0	0	0	0	0	0	0	0	0	0	0	0	0	0	0	0	0	0	0	0	0	0	0
Bacteria	Bacteroidetes	Chitinophagia	Chitinophagales	Chitinophagaceae	Chitinophaga		2|976|1853228|1853229|563835|79328	0	0	0	0	0	0	0	0	0	0	0	0	0	0	0	0	0	0	0	0	0	0	0	0	0	0	0	0	0	0	0	0	0	0	0	0	0	0	0	0	0	0
Bacteria	Bacteroidetes	Chitinophagia	Chitinophagales	Chitinophagaceae	Chitinophaga	Chitinophaga_rupis	2|976|1853228|1853229|563835|79328|573321	0	0	0	0	0	0	0	0	0	0	0	0	0	0	0	0	0	0	0	0	0	0	0	0	0	0	0	0	0	0	0	0	0	0	0	0	0	0	0	0	0	0
Bacteria	Bacteroidetes	Chitinophagia	Chitinophagales	Chitinophagaceae	Flavihumibacter		2|976|1853228|1853229|563835|1004301	0	0	0	0	0	0	0	0	0	0	0	0	0.17043	0	0	0	0	0	0	0	0	0	0	0	0	0	0	0	0	0	0	0	0	0	0	0	0	0	0	0	0	0
Bacteria	Bacteroidetes	Chitinophagia	Chitinophagales	Chitinophagaceae	Flavihumibacter	Flavihumibacter_solisilvae	2|976|1853228|1853229|563835|1004301|1349421	0	0	0	0	0	0	0	0	0	0	0	0	0.17043	0	0	0	0	0	0	0	0	0	0	0	0	0	0	0	0	0	0	0	0	0	0	0	0	0	0	0	0	0
Bacteria	Bacteroidetes	Chitinophagia	Chitinophagales	Chitinophagaceae	Flavihumibacter	Flavihumibacter_sp_ZG627	2|976|1853228|1853229|563835|1004301|1463156	0	0	0	0	0	0	0	0	0	0	0	0	0	0	0	0	0	0	0	0	0	0	0	0	0	0	0	0	0	0	0	0	0	0	0	0	0	0	0	0	0	0
Bacteria	Bacteroidetes	Chitinophagia	Chitinophagales	Chitinophagaceae	Flavisolibacter		2|976|1853228|1853229|563835|398041	0	0	0	0	0	0	0	0	0	0	0	0	0	0	0	0	0	0	0	0	0	0	0	0	0	0	0	0	0	0	0	0	0	0	0	0	0	0	0	0	0	0
Bacteria	Bacteroidetes	Chitinophagia	Chitinophagales	Chitinophagaceae	Flavisolibacter	Flavisolibacter_ginsengisoli	2|976|1853228|1853229|563835|398041|462367	0	0	0	0	0	0	0	0	0	0	0	0	0	0	0	0	0	0	0	0	0	0	0	0	0	0	0	0	0	0	0	0	0	0	0	0	0	0	0	0	0	0
Bacteria	Bacteroidetes	Chitinophagia	Chitinophagales	Chitinophagaceae	Niastella		2|976|1853228|1853229|563835|354354	0	0	0	0	0	0	0	0	0	0	0	0	0	0	0	0	0	0	0	0	0	0	0	0	0	0	0	0	0	0	0	0	0	0	0	0	0	0	0	0	0	0
Bacteria	Bacteroidetes	Chitinophagia	Chitinophagales	Chitinophagaceae	Niastella	Niastella_populi	2|976|1853228|1853229|563835|354354|550983	0	0	0	0	0	0	0	0	0	0	0	0	0	0	0	0	0	0	0	0	0	0	0	0	0	0	0	0	0	0	0	0	0	0	0	0	0	0	0	0	0	0
Bacteria	Bacteroidetes	Chitinophagia	Chitinophagales	Chitinophagaceae	Parafilimonas		2|976|1853228|1853229|563835|1649476	0	0	0	0	0	0	0	0	0	0	0	0	0	0	0	0	0	0	0	0	0	0	0	0	0	0	0	0	0	0	0	0	0	0	0	0	0	0	0	0	0	0
Bacteria	Bacteroidetes	Chitinophagia	Chitinophagales	Chitinophagaceae	Parafilimonas	Parafilimonas_terrae	2|976|1853228|1853229|563835|1649476|1465490	0	0	0	0	0	0	0	0	0	0	0	0	0	0	0	0	0	0	0	0	0	0	0	0	0	0	0	0	0	0	0	0	0	0	0	0	0	0	0	0	0	0
Bacteria	Bacteroidetes	Cytophagia					2|976|768503	0	0	0	0	0	0	0	0	0	0	0	0	0	0.1213	0.15249	0.0128	0	0	0	0	0	0	0	0	0	0	0	0	0	0	0	0	0	0	0	0	0	0	0	0	0	0
Bacteria	Bacteroidetes	Cytophagia	Cytophagales				2|976|768503|768507	0	0	0	0	0	0	0	0	0	0	0	0	0	0.1213	0.15249	0.0128	0	0	0	0	0	0	0	0	0	0	0	0	0	0	0	0	0	0	0	0	0	0	0	0	0	0
Bacteria	Bacteroidetes	Cytophagia	Cytophagales	Amoebophilaceae			2|976|768503|768507|1501348	0	0	0	0	0	0	0	0	0	0	0	0	0	0	0	0	0	0	0	0	0	0	0	0	0	0	0	0	0	0	0	0	0	0	0	0	0	0	0	0	0	0
Bacteria	Bacteroidetes	Cytophagia	Cytophagales	Amoebophilaceae	Candidatus_Amoebophilus		2|976|768503|768507|1501348|281119	0	0	0	0	0	0	0	0	0	0	0	0	0	0	0	0	0	0	0	0	0	0	0	0	0	0	0	0	0	0	0	0	0	0	0	0	0	0	0	0	0	0
Bacteria	Bacteroidetes	Cytophagia	Cytophagales	Amoebophilaceae	Candidatus_Amoebophilus	Candidatus_Amoebophilus_asiaticus	2|976|768503|768507|1501348|281119|281120	0	0	0	0	0	0	0	0	0	0	0	0	0	0	0	0	0	0	0	0	0	0	0	0	0	0	0	0	0	0	0	0	0	0	0	0	0	0	0	0	0	0
Bacteria	Bacteroidetes	Cytophagia	Cytophagales	Cytophagaceae			2|976|768503|768507|89373	0	0	0	0	0	0	0	0	0	0	0	0	0	0	0	0.0128	0	0	0	0	0	0	0	0	0	0	0	0	0	0	0	0	0	0	0	0	0	0	0	0	0	0
Bacteria	Bacteroidetes	Cytophagia	Cytophagales	Cytophagaceae	Cytophaga		2|976|768503|768507|89373|978	0	0	0	0	0	0	0	0	0	0	0	0	0	0	0	0	0	0	0	0	0	0	0	0	0	0	0	0	0	0	0	0	0	0	0	0	0	0	0	0	0	0
Bacteria	Bacteroidetes	Cytophagia	Cytophagales	Cytophagaceae	Cytophaga	Cytophaga_hutchinsonii	2|976|768503|768507|89373|978|985	0	0	0	0	0	0	0	0	0	0	0	0	0	0	0	0	0	0	0	0	0	0	0	0	0	0	0	0	0	0	0	0	0	0	0	0	0	0	0	0	0	0
Bacteria	Bacteroidetes	Cytophagia	Cytophagales	Cytophagaceae	Cytophaga	Cytophaga_xylanolytica	2|976|768503|768507|89373|978|990	0	0	0	0	0	0	0	0	0	0	0	0	0	0	0	0	0	0	0	0	0	0	0	0	0	0	0	0	0	0	0	0	0	0	0	0	0	0	0	0	0	0
Bacteria	Bacteroidetes	Cytophagia	Cytophagales	Cytophagaceae	Dyadobacter		2|976|768503|768507|89373|120831	0	0	0	0	0	0	0	0	0	0	0	0	0	0	0	0.0128	0	0	0	0	0	0	0	0	0	0	0	0	0	0	0	0	0	0	0	0	0	0	0	0	0	0
Bacteria	Bacteroidetes	Cytophagia	Cytophagales	Cytophagaceae	Dyadobacter	Dyadobacter_fermentans	2|976|768503|768507|89373|120831|94254	0	0	0	0	0	0	0	0	0	0	0	0	0	0	0	0	0	0	0	0	0	0	0	0	0	0	0	0	0	0	0	0	0	0	0	0	0	0	0	0	0	0
Bacteria	Bacteroidetes	Cytophagia	Cytophagales	Cytophagaceae	Dyadobacter	Dyadobacter_sp_Leaf189	2|976|768503|768507|89373|120831|1736295	0	0	0	0	0	0	0	0	0	0	0	0	0	0	0	0.0128	0	0	0	0	0	0	0	0	0	0	0	0	0	0	0	0	0	0	0	0	0	0	0	0	0	0
Bacteria	Bacteroidetes	Cytophagia	Cytophagales	Cytophagaceae	Flectobacillus		2|976|768503|768507|89373|101	0	0	0	0	0	0	0	0	0	0	0	0	0	0	0	0	0	0	0	0	0	0	0	0	0	0	0	0	0	0	0	0	0	0	0	0	0	0	0	0	0	0
Bacteria	Bacteroidetes	Cytophagia	Cytophagales	Cytophagaceae	Flectobacillus	Flectobacillus_sp_BAB_3569	2|976|768503|768507|89373|101|1509483	0	0	0	0	0	0	0	0	0	0	0	0	0	0	0	0	0	0	0	0	0	0	0	0	0	0	0	0	0	0	0	0	0	0	0	0	0	0	0	0	0	0
Bacteria	Bacteroidetes	Cytophagia	Cytophagales	Cytophagaceae	Larkinella		2|976|768503|768507|89373|332157	0	0	0	0	0	0	0	0	0	0	0	0	0	0	0	0	0	0	0	0	0	0	0	0	0	0	0	0	0	0	0	0	0	0	0	0	0	0	0	0	0	0
Bacteria	Bacteroidetes	Cytophagia	Cytophagales	Cytophagaceae	Larkinella	Larkinella_arboricola	2|976|768503|768507|89373|332157|643671	0	0	0	0	0	0	0	0	0	0	0	0	0	0	0	0	0	0	0	0	0	0	0	0	0	0	0	0	0	0	0	0	0	0	0	0	0	0	0	0	0	0
Bacteria	Bacteroidetes	Cytophagia	Cytophagales	Cytophagales_unclassified				0	0	0	0	0	0	0	0	0	0	0	0	0	0	0	0	0	0	0	0	0	0	0	0	0	0	0	0	0	0	0	0	0	0	0	0	0	0	0	0	0	0
Bacteria	Bacteroidetes	Cytophagia	Cytophagales	Cytophagales_unclassified	Chryseolinea		2|976|768503|768507||1433993	0	0	0	0	0	0	0	0	0	0	0	0	0	0	0	0	0	0	0	0	0	0	0	0	0	0	0	0	0	0	0	0	0	0	0	0	0	0	0	0	0	0
Bacteria	Bacteroidetes	Cytophagia	Cytophagales	Cytophagales_unclassified	Chryseolinea	Chryseolinea_flava	2|976|768503|768507||1433993|2059302	0	0	0	0	0	0	0	0	0	0	0	0	0	0	0	0	0	0	0	0	0	0	0	0	0	0	0	0	0	0	0	0	0	0	0	0	0	0	0	0	0	0
Bacteria	Bacteroidetes	Cytophagia	Cytophagales	Flammeovirgaceae			2|976|768503|768507|200667	0	0	0	0	0	0	0	0	0	0	0	0	0	0	0	0	0	0	0	0	0	0	0	0	0	0	0	0	0	0	0	0	0	0	0	0	0	0	0	0	0	0
Bacteria	Bacteroidetes	Cytophagia	Cytophagales	Flammeovirgaceae	Marivirga		2|976|768503|768507|200667|869806	0	0	0	0	0	0	0	0	0	0	0	0	0	0	0	0	0	0	0	0	0	0	0	0	0	0	0	0	0	0	0	0	0	0	0	0	0	0	0	0	0	0
Bacteria	Bacteroidetes	Cytophagia	Cytophagales	Flammeovirgaceae	Marivirga	Marivirga_lumbricoides	2|976|768503|768507|200667|869806|1046115	0	0	0	0	0	0	0	0	0	0	0	0	0	0	0	0	0	0	0	0	0	0	0	0	0	0	0	0	0	0	0	0	0	0	0	0	0	0	0	0	0	0
Bacteria	Bacteroidetes	Cytophagia	Cytophagales	Hymenobacteraceae			2|976|768503|768507|1853232	0	0	0	0	0	0	0	0	0	0	0	0	0	0.1213	0.15249	0	0	0	0	0	0	0	0	0	0	0	0	0	0	0	0	0	0	0	0	0	0	0	0	0	0	0
Bacteria	Bacteroidetes	Cytophagia	Cytophagales	Hymenobacteraceae	Hymenobacter		2|976|768503|768507|1853232|89966	0	0	0	0	0	0	0	0	0	0	0	0	0	0	0	0	0	0	0	0	0	0	0	0	0	0	0	0	0	0	0	0	0	0	0	0	0	0	0	0	0	0
Bacteria	Bacteroidetes	Cytophagia	Cytophagales	Hymenobacteraceae	Hymenobacter	Hymenobacter_mucosus	2|976|768503|768507|1853232|89966|1411120	0	0	0	0	0	0	0	0	0	0	0	0	0	0	0	0	0	0	0	0	0	0	0	0	0	0	0	0	0	0	0	0	0	0	0	0	0	0	0	0	0	0
Bacteria	Bacteroidetes	Cytophagia	Cytophagales	Hymenobacteraceae	Hymenobacter	Hymenobacter_psychrotolerans	2|976|768503|768507|1853232|89966|344998	0	0	0	0	0	0	0	0	0	0	0	0	0	0	0	0	0	0	0	0	0	0	0	0	0	0	0	0	0	0	0	0	0	0	0	0	0	0	0	0	0	0
Bacteria	Bacteroidetes	Cytophagia	Cytophagales	Hymenobacteraceae	Hymenobacter	Hymenobacter_sedentarius	2|976|768503|768507|1853232|89966|1411621	0	0	0	0	0	0	0	0	0	0	0	0	0	0	0	0	0	0	0	0	0	0	0	0	0	0	0	0	0	0	0	0	0	0	0	0	0	0	0	0	0	0
Bacteria	Bacteroidetes	Cytophagia	Cytophagales	Hymenobacteraceae	Hymenobacter	Hymenobacter_sp_APR13	2|976|768503|768507|1853232|89966|1356852	0	0	0	0	0	0	0	0	0	0	0	0	0	0	0	0	0	0	0	0	0	0	0	0	0	0	0	0	0	0	0	0	0	0	0	0	0	0	0	0	0	0
Bacteria	Bacteroidetes	Cytophagia	Cytophagales	Hymenobacteraceae	Hymenobacter	Hymenobacter_swuensis	2|976|768503|768507|1853232|89966|1446467	0	0	0	0	0	0	0	0	0	0	0	0	0	0	0	0	0	0	0	0	0	0	0	0	0	0	0	0	0	0	0	0	0	0	0	0	0	0	0	0	0	0
Bacteria	Bacteroidetes	Cytophagia	Cytophagales	Hymenobacteraceae	Pontibacter		2|976|768503|768507|1853232|323449	0	0	0	0	0	0	0	0	0	0	0	0	0	0.1213	0.15249	0	0	0	0	0	0	0	0	0	0	0	0	0	0	0	0	0	0	0	0	0	0	0	0	0	0	0
Bacteria	Bacteroidetes	Cytophagia	Cytophagales	Hymenobacteraceae	Pontibacter	Pontibacter_lucknowensis	2|976|768503|768507|1853232|323449|1077936	0	0	0	0	0	0	0	0	0	0	0	0	0	0.1213	0.15249	0	0	0	0	0	0	0	0	0	0	0	0	0	0	0	0	0	0	0	0	0	0	0	0	0	0	0
Bacteria	Bacteroidetes	Cytophagia	Cytophagales	Hymenobacteraceae	Pontibacter	Pontibacter_sp_2b14	2|976|768503|768507|1853232|323449|2080288	0	0	0	0	0	0	0	0	0	0	0	0	0	0	0	0	0	0	0	0	0	0	0	0	0	0	0	0	0	0	0	0	0	0	0	0	0	0	0	0	0	0
Bacteria	Bacteroidetes	Cytophagia	Cytophagales	Hymenobacteraceae	Rufibacter		2|976|768503|768507|1853232|1379908	0	0	0	0	0	0	0	0	0	0	0	0	0	0	0	0	0	0	0	0	0	0	0	0	0	0	0	0	0	0	0	0	0	0	0	0	0	0	0	0	0	0
Bacteria	Bacteroidetes	Cytophagia	Cytophagales	Hymenobacteraceae	Rufibacter	Rufibacter_sp_DG15C	2|976|768503|768507|1853232|1379908|1379909	0	0	0	0	0	0	0	0	0	0	0	0	0	0	0	0	0	0	0	0	0	0	0	0	0	0	0	0	0	0	0	0	0	0	0	0	0	0	0	0	0	0
Bacteria	Bacteroidetes	Cytophagia	Cytophagales	Hymenobacteraceae	Rufibacter	Rufibacter_sp_DG31D	2|976|768503|768507|1853232|1379908|1379910	0	0	0	0	0	0	0	0	0	0	0	0	0	0	0	0	0	0	0	0	0	0	0	0	0	0	0	0	0	0	0	0	0	0	0	0	0	0	0	0	0	0
Bacteria	Bacteroidetes	Flavobacteriia					2|976|117743	0	0	0.00787	0	0.01145	0.09216	0.029	0.04776	0.09974	0.02794	0.26662	0	26.69329	0.63688	26.45103	9.88885	0	0	0	0	0	0	0	0	0.30745	1.05965	0.79228	0.08433	0.01181	0.00953	0.02055	0.07393	0.52804	2.26594	0.06999	0.0156	0.00571	1.97984	1.55235	0	0	0
Bacteria	Bacteroidetes	Flavobacteriia	Flavobacteriales				2|976|117743|200644	0	0	0.00787	0	0.01145	0.09216	0.029	0.04776	0.09974	0.02794	0.26662	0	26.69329	0.63688	26.45103	9.88885	0	0	0	0	0	0	0	0	0.30745	1.05965	0.79228	0.08433	0.01181	0.00953	0.02055	0.07393	0.52804	2.26594	0.06999	0.0156	0.00571	1.97984	1.55235	0	0	0
Bacteria	Bacteroidetes	Flavobacteriia	Flavobacteriales	Crocinitomicaceae			2|976|117743|200644|1853230	0	0	0	0	0	0	0	0	0	0	0	0	0	0	0	0	0	0	0	0	0	0	0	0	0	0	0	0	0	0	0	0	0	0	0	0	0	0	0	0	0	0
Bacteria	Bacteroidetes	Flavobacteriia	Flavobacteriales	Crocinitomicaceae	Fluviicola		2|976|117743|200644|1853230|332102	0	0	0	0	0	0	0	0	0	0	0	0	0	0	0	0	0	0	0	0	0	0	0	0	0	0	0	0	0	0	0	0	0	0	0	0	0	0	0	0	0	0
Bacteria	Bacteroidetes	Flavobacteriia	Flavobacteriales	Crocinitomicaceae	Fluviicola	Fluviicola_taffensis	2|976|117743|200644|1853230|332102|191579	0	0	0	0	0	0	0	0	0	0	0	0	0	0	0	0	0	0	0	0	0	0	0	0	0	0	0	0	0	0	0	0	0	0	0	0	0	0	0	0	0	0
Bacteria	Bacteroidetes	Flavobacteriia	Flavobacteriales	Flavobacteriaceae			2|976|117743|200644|49546	0	0	0.00787	0	0.01145	0.09216	0.029	0.04776	0.09974	0.02794	0.26662	0	26.69329	0.63688	26.45103	9.88885	0	0	0	0	0	0	0	0	0.30745	1.05965	0.79228	0.08433	0.01181	0.00953	0.02055	0.07393	0.52804	2.26594	0.06999	0.0156	0.00571	1.97984	1.55235	0	0	0
Bacteria	Bacteroidetes	Flavobacteriia	Flavobacteriales	Flavobacteriaceae	Aequorivita		2|976|117743|200644|49546|153265	0	0	0	0	0	0	0	0	0	0	0	0	0	0	0	0	0	0	0	0	0	0	0	0	0	0	0	0	0	0	0	0	0	0.13607	0	0	0	0	0	0	0	0
Bacteria	Bacteroidetes	Flavobacteriia	Flavobacteriales	Flavobacteriaceae	Aequorivita	Aequorivita_sp	2|976|117743|200644|49546|153265|1872390	0	0	0	0	0	0	0	0	0	0	0	0	0	0	0	0	0	0	0	0	0	0	0	0	0	0	0	0	0	0	0	0	0	0	0	0	0	0	0	0	0	0
Bacteria	Bacteroidetes	Flavobacteriia	Flavobacteriales	Flavobacteriaceae	Aequorivita	Aequorivita_viscosa	2|976|117743|200644|49546|153265|797419	0	0	0	0	0	0	0	0	0	0	0	0	0	0	0	0	0	0	0	0	0	0	0	0	0	0	0	0	0	0	0	0	0	0.13607	0	0	0	0	0	0	0	0
Bacteria	Bacteroidetes	Flavobacteriia	Flavobacteriales	Flavobacteriaceae	Aequorivita	Aequorivita_vladivostokensis	2|976|117743|200644|49546|153265|171194	0	0	0	0	0	0	0	0	0	0	0	0	0	0	0	0	0	0	0	0	0	0	0	0	0	0	0	0	0	0	0	0	0	0	0	0	0	0	0	0	0	0
Bacteria	Bacteroidetes	Flavobacteriia	Flavobacteriales	Flavobacteriaceae	Aequorivita	Vitellibacter_aquimaris	2|976|117743|200644|49546|153265|1548749	0	0	0	0	0	0	0	0	0	0	0	0	0	0	0	0	0	0	0	0	0	0	0	0	0	0	0	0	0	0	0	0	0	0	0	0	0	0	0	0	0	0
Bacteria	Bacteroidetes	Flavobacteriia	Flavobacteriales	Flavobacteriaceae	Algoriella		2|976|117743|200644|49546|1762932	0	0	0	0	0	0	0	0	0	0	0	0	0	0	0	0	0	0	0	0	0	0	0	0	0	0	0	0	0	0	0	0	0	0	0	0	0	0	0	0	0	0
Bacteria	Bacteroidetes	Flavobacteriia	Flavobacteriales	Flavobacteriaceae	Algoriella	Algoriella_xinjiangensis	2|976|117743|200644|49546|1762932|684065	0	0	0	0	0	0	0	0	0	0	0	0	0	0	0	0	0	0	0	0	0	0	0	0	0	0	0	0	0	0	0	0	0	0	0	0	0	0	0	0	0	0
Bacteria	Bacteroidetes	Flavobacteriia	Flavobacteriales	Flavobacteriaceae	Chryseobacterium		2|976|117743|200644|49546|59732	0	0	0	0	0	0.01271	0.00134	0.00551	0.01184	0	0.26662	0	25.41647	0.00762	0	9.8458	0	0	0	0	0	0	0	0	0	0	0	0	0	0	0	0	0	0.0627	0	0	0	0	0	0	0	0
Bacteria	Bacteroidetes	Flavobacteriia	Flavobacteriales	Flavobacteriaceae	Chryseobacterium	Chryseobacterium_antarcticum	2|976|117743|200644|49546|59732|266748	0	0	0	0	0	0	0	0	0	0	0	0	0	0	0	0	0	0	0	0	0	0	0	0	0	0	0	0	0	0	0	0	0	0	0	0	0	0	0	0	0	0
Bacteria	Bacteroidetes	Flavobacteriia	Flavobacteriales	Flavobacteriaceae	Chryseobacterium	Chryseobacterium_aquaticum	2|976|117743|200644|49546|59732|452084	0	0	0	0	0	0	0	0	0	0	0	0	0	0	0	0	0	0	0	0	0	0	0	0	0	0	0	0	0	0	0	0	0	0	0	0	0	0	0	0	0	0
Bacteria	Bacteroidetes	Flavobacteriia	Flavobacteriales	Flavobacteriaceae	Chryseobacterium	Chryseobacterium_artocarpi	2|976|117743|200644|49546|59732|1414727	0	0	0	0	0	0	0	0	0	0	0	0	0	0	0	0	0	0	0	0	0	0	0	0	0	0	0	0	0	0	0	0	0	0	0	0	0	0	0	0	0	0
Bacteria	Bacteroidetes	Flavobacteriia	Flavobacteriales	Flavobacteriaceae	Chryseobacterium	Chryseobacterium_balustinum	2|976|117743|200644|49546|59732|246	0	0	0	0	0	0	0	0	0	0	0	0	0	0	0	0	0	0	0	0	0	0	0	0	0	0	0	0	0	0	0	0	0	0	0	0	0	0	0	0	0	0
Bacteria	Bacteroidetes	Flavobacteriia	Flavobacteriales	Flavobacteriaceae	Chryseobacterium	Chryseobacterium_carnipullorum	2|976|117743|200644|49546|59732|1124835	0	0	0	0	0	0	0	0	0	0	0	0	0	0	0	0	0	0	0	0	0	0	0	0	0	0	0	0	0	0	0	0	0	0	0	0	0	0	0	0	0	0
Bacteria	Bacteroidetes	Flavobacteriia	Flavobacteriales	Flavobacteriaceae	Chryseobacterium	Chryseobacterium_chaponense	2|976|117743|200644|49546|59732|713588	0	0	0	0	0	0	0	0	0	0	0.26662	0	0	0	0	0	0	0	0	0	0	0	0	0	0	0	0	0	0	0	0	0	0	0	0	0	0	0	0	0	0	0
Bacteria	Bacteroidetes	Flavobacteriia	Flavobacteriales	Flavobacteriaceae	Chryseobacterium	Chryseobacterium_gambrini	2|976|117743|200644|49546|59732|373672	0	0	0	0	0	0	0	0	0	0	0	0	0	0	0	0	0	0	0	0	0	0	0	0	0	0	0	0	0	0	0	0	0	0	0	0	0	0	0	0	0	0
Bacteria	Bacteroidetes	Flavobacteriia	Flavobacteriales	Flavobacteriaceae	Chryseobacterium	Chryseobacterium_greenlandense	2|976|117743|200644|49546|59732|345663	0	0	0	0	0	0	0	0	0	0	0	0	0	0	0	0	0	0	0	0	0	0	0	0	0	0	0	0	0	0	0	0	0	0	0	0	0	0	0	0	0	0
Bacteria	Bacteroidetes	Flavobacteriia	Flavobacteriales	Flavobacteriaceae	Chryseobacterium	Chryseobacterium_haifense	2|976|117743|200644|49546|59732|421525	0	0	0	0	0	0	0	0	0	0	0	0	0	0	0	0.09584	0	0	0	0	0	0	0	0	0	0	0	0	0	0	0	0	0	0	0	0	0	0	0	0	0	0
Bacteria	Bacteroidetes	Flavobacteriia	Flavobacteriales	Flavobacteriaceae	Chryseobacterium	Chryseobacterium_halperniae	2|976|117743|200644|49546|59732|421072	0	0	0	0	0	0	0	0	0	0	0	0	0.13516	0	0	0	0	0	0	0	0	0	0	0	0	0	0	0	0	0	0	0	0	0	0	0	0	0	0	0	0	0
Bacteria	Bacteroidetes	Flavobacteriia	Flavobacteriales	Flavobacteriaceae	Chryseobacterium	Chryseobacterium_hispanicum	2|976|117743|200644|49546|59732|358687	0	0	0	0	0	0	0	0	0	0	0	0	0	0	0	0	0	0	0	0	0	0	0	0	0	0	0	0	0	0	0	0	0	0	0	0	0	0	0	0	0	0
Bacteria	Bacteroidetes	Flavobacteriia	Flavobacteriales	Flavobacteriaceae	Chryseobacterium	Chryseobacterium_hominis	2|976|117743|200644|49546|59732|420404	0	0	0	0	0	0	0	0	0	0	0	0	0	0	0	0	0	0	0	0	0	0	0	0	0	0	0	0	0	0	0	0	0	0	0	0	0	0	0	0	0	0
Bacteria	Bacteroidetes	Flavobacteriia	Flavobacteriales	Flavobacteriaceae	Chryseobacterium	Chryseobacterium_indologenes	2|976|117743|200644|49546|59732|253	0	0	0	0	0	0	0	0	0	0	0	0	0	0	0	0	0	0	0	0	0	0	0	0	0	0	0	0	0	0	0	0	0	0	0	0	0	0	0	0	0	0
Bacteria	Bacteroidetes	Flavobacteriia	Flavobacteriales	Flavobacteriaceae	Chryseobacterium	Chryseobacterium_indoltheticum	2|976|117743|200644|49546|59732|254	0	0	0	0	0	0	0	0	0	0	0	0	24.84261	0	0	2.18319	0	0	0	0	0	0	0	0	0	0	0	0	0	0	0	0	0	0	0	0	0	0	0	0	0	0
Bacteria	Bacteroidetes	Flavobacteriia	Flavobacteriales	Flavobacteriaceae	Chryseobacterium	Chryseobacterium_jejuense	2|976|117743|200644|49546|59732|445960	0	0	0	0	0	0	0	0	0	0	0	0	0	0	0	0	0	0	0	0	0	0	0	0	0	0	0	0	0	0	0	0	0	0	0	0	0	0	0	0	0	0
Bacteria	Bacteroidetes	Flavobacteriia	Flavobacteriales	Flavobacteriaceae	Chryseobacterium	Chryseobacterium_jeonii	2|976|117743|200644|49546|59732|266749	0	0	0	0	0	0	0	0	0	0	0	0	0	0	0	0	0	0	0	0	0	0	0	0	0	0	0	0	0	0	0	0	0	0	0	0	0	0	0	0	0	0
Bacteria	Bacteroidetes	Flavobacteriia	Flavobacteriales	Flavobacteriaceae	Chryseobacterium	Chryseobacterium_mucoviscidosis	2|976|117743|200644|49546|59732|1945581	0	0	0	0	0	0	0	0	0	0	0	0	0	0	0	0	0	0	0	0	0	0	0	0	0	0	0	0	0	0	0	0	0	0	0	0	0	0	0	0	0	0
Bacteria	Bacteroidetes	Flavobacteriia	Flavobacteriales	Flavobacteriaceae	Chryseobacterium	Chryseobacterium_oncorhynchi	2|976|117743|200644|49546|59732|741074	0	0	0	0	0	0	0	0	0	0	0	0	0	0	0	0	0	0	0	0	0	0	0	0	0	0	0	0	0	0	0	0	0	0	0	0	0	0	0	0	0	0
Bacteria	Bacteroidetes	Flavobacteriia	Flavobacteriales	Flavobacteriaceae	Chryseobacterium	Chryseobacterium_piscicola	2|976|117743|200644|49546|59732|551459	0	0	0	0	0	0	0	0	0	0	0	0	0	0	0	0	0	0	0	0	0	0	0	0	0	0	0	0	0	0	0	0	0	0	0	0	0	0	0	0	0	0
Bacteria	Bacteroidetes	Flavobacteriia	Flavobacteriales	Flavobacteriaceae	Chryseobacterium	Chryseobacterium_piscium	2|976|117743|200644|49546|59732|333702	0	0	0	0	0	0	0	0	0	0	0	0	0	0	0	0	0	0	0	0	0	0	0	0	0	0	0	0	0	0	0	0	0	0	0	0	0	0	0	0	0	0
Bacteria	Bacteroidetes	Flavobacteriia	Flavobacteriales	Flavobacteriaceae	Chryseobacterium	Chryseobacterium_scophthalmum	2|976|117743|200644|49546|59732|59733	0	0	0	0	0	0	0	0	0	0	0	0	0	0	0	0	0	0	0	0	0	0	0	0	0	0	0	0	0	0	0	0	0	0	0	0	0	0	0	0	0	0
Bacteria	Bacteroidetes	Flavobacteriia	Flavobacteriales	Flavobacteriaceae	Chryseobacterium	Chryseobacterium_solincola	2|976|117743|200644|49546|59732|510955	0	0	0	0	0	0	0	0	0	0	0	0	0	0	0	0.07051	0	0	0	0	0	0	0	0	0	0	0	0	0	0	0	0	0	0	0	0	0	0	0	0	0	0
Bacteria	Bacteroidetes	Flavobacteriia	Flavobacteriales	Flavobacteriaceae	Chryseobacterium	Chryseobacterium_sp_36_9	2|976|117743|200644|49546|59732|1895905	0	0	0	0	0	0	0	0	0	0	0	0	0	0	0	0	0	0	0	0	0	0	0	0	0	0	0	0	0	0	0	0	0	0	0	0	0	0	0	0	0	0
Bacteria	Bacteroidetes	Flavobacteriia	Flavobacteriales	Flavobacteriaceae	Chryseobacterium	Chryseobacterium_sp_39_10	2|976|117743|200644|49546|59732|1895745	0	0	0	0	0	0	0	0	0	0	0	0	0	0	0	0	0	0	0	0	0	0	0	0	0	0	0	0	0	0	0	0	0	0	0	0	0	0	0	0	0	0
Bacteria	Bacteroidetes	Flavobacteriia	Flavobacteriales	Flavobacteriaceae	Chryseobacterium	Chryseobacterium_sp_FP211_J200	2|976|117743|200644|49546|59732|1792309	0	0	0	0	0	0	0	0	0	0	0	0	0	0	0	0	0	0	0	0	0	0	0	0	0	0	0	0	0	0	0	0	0	0	0	0	0	0	0	0	0	0
Bacteria	Bacteroidetes	Flavobacteriia	Flavobacteriales	Flavobacteriaceae	Chryseobacterium	Chryseobacterium_sp_JAH	2|976|117743|200644|49546|59732|1742858	0	0	0	0	0	0	0	0	0	0	0	0	0	0	0	0	0	0	0	0	0	0	0	0	0	0	0	0	0	0	0	0	0	0	0	0	0	0	0	0	0	0
Bacteria	Bacteroidetes	Flavobacteriia	Flavobacteriales	Flavobacteriaceae	Chryseobacterium	Chryseobacterium_sp_Leaf394	2|976|117743|200644|49546|59732|1736361	0	0	0	0	0	0	0	0	0	0	0	0	0.4387	0	0	0	0	0	0	0	0	0	0	0	0	0	0	0	0	0	0	0	0	0	0	0	0	0	0	0	0	0
Bacteria	Bacteroidetes	Flavobacteriia	Flavobacteriales	Flavobacteriaceae	Chryseobacterium	Chryseobacterium_sp_VAUSW3	2|976|117743|200644|49546|59732|2010998	0	0	0	0	0	0.01271	0.00134	0.00551	0.01184	0	0	0	0	0.00762	0	5.76138	0	0	0	0	0	0	0	0	0	0	0	0	0	0	0	0	0	0.01305	0	0	0	0	0	0	0	0
Bacteria	Bacteroidetes	Flavobacteriia	Flavobacteriales	Flavobacteriaceae	Chryseobacterium	Chryseobacterium_sp_YLOS41	2|976|117743|200644|49546|59732|2058346	0	0	0	0	0	0	0	0	0	0	0	0	0	0	0	1.68645	0	0	0	0	0	0	0	0	0	0	0	0	0	0	0	0	0	0.04965	0	0	0	0	0	0	0	0
Bacteria	Bacteroidetes	Flavobacteriia	Flavobacteriales	Flavobacteriaceae	Chryseobacterium	Chryseobacterium_treverense	2|976|117743|200644|49546|59732|631455	0	0	0	0	0	0	0	0	0	0	0	0	0	0	0	0.04845	0	0	0	0	0	0	0	0	0	0	0	0	0	0	0	0	0	0	0	0	0	0	0	0	0	0
Bacteria	Bacteroidetes	Flavobacteriia	Flavobacteriales	Flavobacteriaceae	Chryseobacterium	Chryseobacterium_ureilyticum	2|976|117743|200644|49546|59732|373668	0	0	0	0	0	0	0	0	0	0	0	0	0	0	0	0	0	0	0	0	0	0	0	0	0	0	0	0	0	0	0	0	0	0	0	0	0	0	0	0	0	0
Bacteria	Bacteroidetes	Flavobacteriia	Flavobacteriales	Flavobacteriaceae	Chryseobacterium	Chryseobacterium_vrystaatense	2|976|117743|200644|49546|59732|307480	0	0	0	0	0	0	0	0	0	0	0	0	0	0	0	0	0	0	0	0	0	0	0	0	0	0	0	0	0	0	0	0	0	0	0	0	0	0	0	0	0	0
Bacteria	Bacteroidetes	Flavobacteriia	Flavobacteriales	Flavobacteriaceae	Cloacibacterium		2|976|117743|200644|49546|501783	0	0	0	0	0	0	0	0	0	0	0	0	0	0	0	0	0	0	0	0	0	0	0	0	0	0	0	0	0	0	0	0	0	0	0	0	0	0	0	0	0	0
Bacteria	Bacteroidetes	Flavobacteriia	Flavobacteriales	Flavobacteriaceae	Cloacibacterium	Cloacibacterium_normanense	2|976|117743|200644|49546|501783|237258	0	0	0	0	0	0	0	0	0	0	0	0	0	0	0	0	0	0	0	0	0	0	0	0	0	0	0	0	0	0	0	0	0	0	0	0	0	0	0	0	0	0
Bacteria	Bacteroidetes	Flavobacteriia	Flavobacteriales	Flavobacteriaceae	Elizabethkingia		2|976|117743|200644|49546|308865	0	0	0	0	0	0	0	0	0	0	0	0	0	0	0	0	0	0	0	0	0	0	0	0	0	0	0	0	0	0	0	0	0	0	0	0	0	0	0	0	0	0
Bacteria	Bacteroidetes	Flavobacteriia	Flavobacteriales	Flavobacteriaceae	Elizabethkingia	Elizabethkingia_anophelis	2|976|117743|200644|49546|308865|1117645	0	0	0	0	0	0	0	0	0	0	0	0	0	0	0	0	0	0	0	0	0	0	0	0	0	0	0	0	0	0	0	0	0	0	0	0	0	0	0	0	0	0
Bacteria	Bacteroidetes	Flavobacteriia	Flavobacteriales	Flavobacteriaceae	Elizabethkingia	Elizabethkingia_meningoseptica	2|976|117743|200644|49546|308865|238	0	0	0	0	0	0	0	0	0	0	0	0	0	0	0	0	0	0	0	0	0	0	0	0	0	0	0	0	0	0	0	0	0	0	0	0	0	0	0	0	0	0
Bacteria	Bacteroidetes	Flavobacteriia	Flavobacteriales	Flavobacteriaceae	Empedobacter		2|976|117743|200644|49546|59734	0	0	0	0	0	0	0	0	0	0	0	0	0	0	0	0	0	0	0	0	0	0	0	0	0	0.00027	0	0	0	0	0	0	0.00257	0.00032	0	0	0	0.00095	0	0	0	0
Bacteria	Bacteroidetes	Flavobacteriia	Flavobacteriales	Flavobacteriaceae	Empedobacter	Empedobacter_falsenii	2|976|117743|200644|49546|59734|343874	0	0	0	0	0	0	0	0	0	0	0	0	0	0	0	0	0	0	0	0	0	0	0	0	0	0.00027	0	0	0	0	0	0	0.00257	0.00032	0	0	0	0.00095	0	0	0	0
Bacteria	Bacteroidetes	Flavobacteriia	Flavobacteriales	Flavobacteriaceae	Flavobacteriaceae_unclassified			0	0	0	0	0	0	0	0	0	0	0	0	0	0	0	0.02871	0	0	0	0	0	0	0	0	0	0	0	0	0	0	0	0	0	0.04475	0	0	0	0.05985	0	0	0	0
Bacteria	Bacteroidetes	Flavobacteriia	Flavobacteriales	Flavobacteriaceae	Flavobacteriaceae_unclassified	Flavobacteriaceae_bacterium_3519_10	2|976|117743|200644|49546||531844	0	0	0	0	0	0	0	0	0	0	0	0	0	0	0	0.02419	0	0	0	0	0	0	0	0	0	0	0	0	0	0	0	0	0	0	0	0	0	0	0	0	0	0
Bacteria	Bacteroidetes	Flavobacteriia	Flavobacteriales	Flavobacteriaceae	Flavobacteriaceae_unclassified	Flavobacteriaceae_bacterium_UR159	2|976|117743|200644|49546||2008672	0	0	0	0	0	0	0	0	0	0	0	0	0	0	0	0.00452	0	0	0	0	0	0	0	0	0	0	0	0	0	0	0	0	0	0.04475	0	0	0	0.05985	0	0	0	0
Bacteria	Bacteroidetes	Flavobacteriia	Flavobacteriales	Flavobacteriaceae	Flavobacterium		2|976|117743|200644|49546|237	0	0	0	0	0	0	0	0	0	0	0	0	1.27681	0	0	0.01433	0	0	0	0	0	0	0	0	0	0	0	0	0	0	0	0	0	0	0	0	0	0	0	0	0	0
Bacteria	Bacteroidetes	Flavobacteriia	Flavobacteriales	Flavobacteriaceae	Flavobacterium	Flavobacterium_aquaticum	2|976|117743|200644|49546|237|1236486	0	0	0	0	0	0	0	0	0	0	0	0	0	0	0	0	0	0	0	0	0	0	0	0	0	0	0	0	0	0	0	0	0	0	0	0	0	0	0	0	0	0
Bacteria	Bacteroidetes	Flavobacteriia	Flavobacteriales	Flavobacteriaceae	Flavobacterium	Flavobacterium_aquatile	2|976|117743|200644|49546|237|245	0	0	0	0	0	0	0	0	0	0	0	0	0	0	0	0	0	0	0	0	0	0	0	0	0	0	0	0	0	0	0	0	0	0	0	0	0	0	0	0	0	0
Bacteria	Bacteroidetes	Flavobacteriia	Flavobacteriales	Flavobacteriaceae	Flavobacterium	Flavobacterium_aquidurense	2|976|117743|200644|49546|237|362413	0	0	0	0	0	0	0	0	0	0	0	0	0	0	0	0	0	0	0	0	0	0	0	0	0	0	0	0	0	0	0	0	0	0	0	0	0	0	0	0	0	0
Bacteria	Bacteroidetes	Flavobacteriia	Flavobacteriales	Flavobacteriaceae	Flavobacterium	Flavobacterium_commune	2|976|117743|200644|49546|237|1306519	0	0	0	0	0	0	0	0	0	0	0	0	0	0	0	0	0	0	0	0	0	0	0	0	0	0	0	0	0	0	0	0	0	0	0	0	0	0	0	0	0	0
Bacteria	Bacteroidetes	Flavobacteriia	Flavobacteriales	Flavobacteriaceae	Flavobacterium	Flavobacterium_cucumis	2|976|117743|200644|49546|237|416016	0	0	0	0	0	0	0	0	0	0	0	0	0	0	0	0	0	0	0	0	0	0	0	0	0	0	0	0	0	0	0	0	0	0	0	0	0	0	0	0	0	0
Bacteria	Bacteroidetes	Flavobacteriia	Flavobacteriales	Flavobacteriaceae	Flavobacterium	Flavobacterium_flevense	2|976|117743|200644|49546|237|983	0	0	0	0	0	0	0	0	0	0	0	0	0	0	0	0	0	0	0	0	0	0	0	0	0	0	0	0	0	0	0	0	0	0	0	0	0	0	0	0	0	0
Bacteria	Bacteroidetes	Flavobacteriia	Flavobacteriales	Flavobacteriaceae	Flavobacterium	Flavobacterium_frigoris	2|976|117743|200644|49546|237|229204	0	0	0	0	0	0	0	0	0	0	0	0	0	0	0	0	0	0	0	0	0	0	0	0	0	0	0	0	0	0	0	0	0	0	0	0	0	0	0	0	0	0
Bacteria	Bacteroidetes	Flavobacteriia	Flavobacteriales	Flavobacteriaceae	Flavobacterium	Flavobacterium_oncorhynchi	2|976|117743|200644|49546|237|728056	0	0	0	0	0	0	0	0	0	0	0	0	0	0	0	0	0	0	0	0	0	0	0	0	0	0	0	0	0	0	0	0	0	0	0	0	0	0	0	0	0	0
Bacteria	Bacteroidetes	Flavobacteriia	Flavobacteriales	Flavobacteriaceae	Flavobacterium	Flavobacterium_piscis	2|976|117743|200644|49546|237|1114874	0	0	0	0	0	0	0	0	0	0	0	0	0	0	0	0	0	0	0	0	0	0	0	0	0	0	0	0	0	0	0	0	0	0	0	0	0	0	0	0	0	0
Bacteria	Bacteroidetes	Flavobacteriia	Flavobacteriales	Flavobacteriaceae	Flavobacterium	Flavobacterium_plurextorum	2|976|117743|200644|49546|237|1114867	0	0	0	0	0	0	0	0	0	0	0	0	0	0	0	0	0	0	0	0	0	0	0	0	0	0	0	0	0	0	0	0	0	0	0	0	0	0	0	0	0	0
Bacteria	Bacteroidetes	Flavobacteriia	Flavobacteriales	Flavobacteriaceae	Flavobacterium	Flavobacterium_seoulense	2|976|117743|200644|49546|237|1492738	0	0	0	0	0	0	0	0	0	0	0	0	1.09148	0	0	0	0	0	0	0	0	0	0	0	0	0	0	0	0	0	0	0	0	0	0	0	0	0	0	0	0	0
Bacteria	Bacteroidetes	Flavobacteriia	Flavobacteriales	Flavobacteriaceae	Flavobacterium	Flavobacterium_sp_11	2|976|117743|200644|49546|237|357523	0	0	0	0	0	0	0	0	0	0	0	0	0	0	0	0	0	0	0	0	0	0	0	0	0	0	0	0	0	0	0	0	0	0	0	0	0	0	0	0	0	0
Bacteria	Bacteroidetes	Flavobacteriia	Flavobacteriales	Flavobacteriaceae	Flavobacterium	Flavobacterium_sp_HTF	2|976|117743|200644|49546|237|2170732	0	0	0	0	0	0	0	0	0	0	0	0	0	0	0	0	0	0	0	0	0	0	0	0	0	0	0	0	0	0	0	0	0	0	0	0	0	0	0	0	0	0
Bacteria	Bacteroidetes	Flavobacteriia	Flavobacteriales	Flavobacteriaceae	Flavobacterium	Flavobacterium_sp_IMCC34762	2|976|117743|200644|49546|237|2217670	0	0	0	0	0	0	0	0	0	0	0	0	0	0	0	0	0	0	0	0	0	0	0	0	0	0	0	0	0	0	0	0	0	0	0	0	0	0	0	0	0	0
Bacteria	Bacteroidetes	Flavobacteriia	Flavobacteriales	Flavobacteriaceae	Flavobacterium	Flavobacterium_succinicans	2|976|117743|200644|49546|237|29536	0	0	0	0	0	0	0	0	0	0	0	0	0	0	0	0	0	0	0	0	0	0	0	0	0	0	0	0	0	0	0	0	0	0	0	0	0	0	0	0	0	0
Bacteria	Bacteroidetes	Flavobacteriia	Flavobacteriales	Flavobacteriaceae	Flavobacterium	Flavobacterium_ummariense	2|976|117743|200644|49546|237|913024	0	0	0	0	0	0	0	0	0	0	0	0	0.18533	0	0	0.01433	0	0	0	0	0	0	0	0	0	0	0	0	0	0	0	0	0	0	0	0	0	0	0	0	0	0
Bacteria	Bacteroidetes	Flavobacteriia	Flavobacteriales	Flavobacteriaceae	Galbibacter		2|976|117743|200644|49546|379068	0	0	0	0	0	0	0	0	0	0	0	0	0	0	0	0	0	0	0	0	0	0	0	0	0	0	0	0	0	0.00953	0	0	0.00148	1.46979	0.00324	0.0156	0	0.05451	0.00549	0	0	0
Bacteria	Bacteroidetes	Flavobacteriia	Flavobacteriales	Flavobacteriaceae	Galbibacter	Galbibacter_marinus	2|976|117743|200644|49546|379068|555500	0	0	0	0	0	0	0	0	0	0	0	0	0	0	0	0	0	0	0	0	0	0	0	0	0	0	0	0	0	0.00953	0	0	0.00148	1.46979	0.00324	0.0156	0	0.05451	0.00549	0	0	0
Bacteria	Bacteroidetes	Flavobacteriia	Flavobacteriales	Flavobacteriaceae	Myroides		2|976|117743|200644|49546|76831	0	0	0.00787	0	0.01145	0.07945	0.02766	0.04225	0.0879	0.02794	0	0	0	0	0	0	0	0	0	0	0	0	0	0	0.30745	1.05938	0.79228	0.08433	0.01181	0	0.02055	0.07393	0.52399	0.55231	0.06674	0	0.00571	1.86454	1.54686	0	0	0
Bacteria	Bacteroidetes	Flavobacteriia	Flavobacteriales	Flavobacteriaceae	Myroides	Myroides_guanonis	2|976|117743|200644|49546|76831|1150112	0	0	0	0	0	0	0	0	0	0	0	0	0	0	0	0	0	0	0	0	0	0	0	0	0	0	0	0	0	0	0	0	0	0	0	0	0	0	0	0	0	0
Bacteria	Bacteroidetes	Flavobacteriia	Flavobacteriales	Flavobacteriaceae	Myroides	Myroides_marinus	2|976|117743|200644|49546|76831|703342	0	0	0	0	0	0	0	0	0	0	0	0	0	0	0	0	0	0	0	0	0	0	0	0	0	0	0	0	0	0	0	0	0	0	0	0	0	0	0	0	0	0
Bacteria	Bacteroidetes	Flavobacteriia	Flavobacteriales	Flavobacteriaceae	Myroides	Myroides_odoratimimus	2|976|117743|200644|49546|76831|76832	0	0	0.00787	0	0.01145	0.07945	0.02766	0.04225	0.0879	0.02794	0	0	0	0	0	0	0	0	0	0	0	0	0	0	0.30745	1.05938	0.79228	0.08433	0.01181	0	0.02055	0.07393	0.52399	0.55231	0.06674	0	0.00571	1.86454	1.54686	0	0	0
Bacteria	Bacteroidetes	Flavobacteriia	Flavobacteriales	Flavobacteriaceae	Myroides	Myroides_odoratus	2|976|117743|200644|49546|76831|256	0	0	0	0	0	0	0	0	0	0	0	0	0	0	0	0	0	0	0	0	0	0	0	0	0	0	0	0	0	0	0	0	0	0	0	0	0	0	0	0	0	0
Bacteria	Bacteroidetes	Flavobacteriia	Flavobacteriales	Flavobacteriaceae	Myroides	Myroides_phaeus	2|976|117743|200644|49546|76831|702745	0	0	0	0	0	0	0	0	0	0	0	0	0	0	0	0	0	0	0	0	0	0	0	0	0	0	0	0	0	0	0	0	0	0	0	0	0	0	0	0	0	0
Bacteria	Bacteroidetes	Flavobacteriia	Flavobacteriales	Flavobacteriaceae	Riemerella		2|976|117743|200644|49546|34084	0	0	0	0	0	0	0	0	0	0	0	0	0	0	0	0	0	0	0	0	0	0	0	0	0	0	0	0	0	0	0	0	0	0	0	0	0	0	0	0	0	0
Bacteria	Bacteroidetes	Flavobacteriia	Flavobacteriales	Flavobacteriaceae	Riemerella	Riemerella_anatipestifer	2|976|117743|200644|49546|34084|34085	0	0	0	0	0	0	0	0	0	0	0	0	0	0	0	0	0	0	0	0	0	0	0	0	0	0	0	0	0	0	0	0	0	0	0	0	0	0	0	0	0	0
Bacteria	Bacteroidetes	Flavobacteriia	Flavobacteriales	Flavobacteriaceae	Salinimicrobium		2|976|117743|200644|49546|561367	0	0	0	0	0	0	0	0	0	0	0	0	0	0.62925	26.45103	0	0	0	0	0	0	0	0	0	0	0	0	0	0	0	0	0	0	0	0	0	0	0	0	0	0	0
Bacteria	Bacteroidetes	Flavobacteriia	Flavobacteriales	Flavobacteriaceae	Salinimicrobium	Salinimicrobium_sediminis	2|976|117743|200644|49546|561367|1343891	0	0	0	0	0	0	0	0	0	0	0	0	0	0.62925	26.45103	0	0	0	0	0	0	0	0	0	0	0	0	0	0	0	0	0	0	0	0	0	0	0	0	0	0	0
Bacteria	Bacteroidetes	Flavobacteriia	Flavobacteriales	Flavobacteriaceae	Soonwooa		2|976|117743|200644|49546|944321	0	0	0	0	0	0	0	0	0	0	0	0	0	0	0	0	0	0	0	0	0	0	0	0	0	0	0	0	0	0	0	0	0	0	0	0	0	0	0	0	0	0
Bacteria	Bacteroidetes	Flavobacteriia	Flavobacteriales	Flavobacteriaceae	Soonwooa	Soonwooa_buanensis	2|976|117743|200644|49546|944321|619805	0	0	0	0	0	0	0	0	0	0	0	0	0	0	0	0	0	0	0	0	0	0	0	0	0	0	0	0	0	0	0	0	0	0	0	0	0	0	0	0	0	0
Bacteria	Bacteroidetes	Flavobacteriia	Flavobacteriales	Flavobacteriaceae	Tenacibaculum		2|976|117743|200644|49546|104267	0	0	0	0	0	0	0	0	0	0	0	0	0	0	0	0	0	0	0	0	0	0	0	0	0	0	0	0	0	0	0	0	0	0	0	0	0	0	0	0	0	0
Bacteria	Bacteroidetes	Flavobacteriia	Flavobacteriales	Flavobacteriaceae	Tenacibaculum	Tenacibaculum_maritimum	2|976|117743|200644|49546|104267|107401	0	0	0	0	0	0	0	0	0	0	0	0	0	0	0	0	0	0	0	0	0	0	0	0	0	0	0	0	0	0	0	0	0	0	0	0	0	0	0	0	0	0
Bacteria	Bacteroidetes	Flavobacteriia	Flavobacteriales	Flavobacteriaceae	Xanthomarina		2|976|117743|200644|49546|1868329	0	0	0	0	0	0	0	0	0	0	0	0	0	0	0	0	0	0	0	0	0	0	0	0	0	0	0	0	0	0	0	0	0	0	0	0	0	0	0	0	0	0
Bacteria	Bacteroidetes	Flavobacteriia	Flavobacteriales	Flavobacteriaceae	Xanthomarina	Xanthomarina_gelatinilytica	2|976|117743|200644|49546|1868329|1137281	0	0	0	0	0	0	0	0	0	0	0	0	0	0	0	0	0	0	0	0	0	0	0	0	0	0	0	0	0	0	0	0	0	0	0	0	0	0	0	0	0	0
Bacteria	Bacteroidetes	Flavobacteriia	Flavobacteriales	Flavobacteriaceae	Xanthomarina	Xanthomarina_sp	2|976|117743|200644|49546|1868329|1931211	0	0	0	0	0	0	0	0	0	0	0	0	0	0	0	0	0	0	0	0	0	0	0	0	0	0	0	0	0	0	0	0	0	0	0	0	0	0	0	0	0	0
Bacteria	Bacteroidetes	Sphingobacteriia					2|976|117747	0	0	0	0	0	0.00596	0	0.0011	0.01488	0	0	0	1.04808	0	0	4.50204	0	0	0	0	0	0	0	0	0	0	0	0	0	0	0	0	0	0.08998	0	0	0	0	0	0	0	0
Bacteria	Bacteroidetes	Sphingobacteriia	Sphingobacteriales				2|976|117747|200666	0	0	0	0	0	0.00596	0	0.0011	0.01488	0	0	0	1.04808	0	0	4.50204	0	0	0	0	0	0	0	0	0	0	0	0	0	0	0	0	0	0.08998	0	0	0	0	0	0	0	0
Bacteria	Bacteroidetes	Sphingobacteriia	Sphingobacteriales	Sphingobacteriaceae			2|976|117747|200666|84566	0	0	0	0	0	0.00596	0	0.0011	0.01488	0	0	0	1.04808	0	0	4.50204	0	0	0	0	0	0	0	0	0	0	0	0	0	0	0	0	0	0.08998	0	0	0	0	0	0	0	0
Bacteria	Bacteroidetes	Sphingobacteriia	Sphingobacteriales	Sphingobacteriaceae	Arcticibacter		2|976|117747|200666|84566|1288026	0	0	0	0	0	0	0	0	0	0	0	0	0	0	0	0.02123	0	0	0	0	0	0	0	0	0	0	0	0	0	0	0	0	0	0	0	0	0	0	0	0	0	0
Bacteria	Bacteroidetes	Sphingobacteriia	Sphingobacteriales	Sphingobacteriaceae	Arcticibacter	Arcticibacter_pallidicorallinus	2|976|117747|200666|84566|1288026|1259464	0	0	0	0	0	0	0	0	0	0	0	0	0	0	0	0.02123	0	0	0	0	0	0	0	0	0	0	0	0	0	0	0	0	0	0	0	0	0	0	0	0	0	0
Bacteria	Bacteroidetes	Sphingobacteriia	Sphingobacteriales	Sphingobacteriaceae	Mucilaginibacter		2|976|117747|200666|84566|423349	0	0	0	0	0	0	0	0	0	0	0	0	0	0	0	0	0	0	0	0	0	0	0	0	0	0	0	0	0	0	0	0	0	0	0	0	0	0	0	0	0	0
Bacteria	Bacteroidetes	Sphingobacteriia	Sphingobacteriales	Sphingobacteriaceae	Mucilaginibacter	Mucilaginibacter_rubeus	2|976|117747|200666|84566|423349|2027860	0	0	0	0	0	0	0	0	0	0	0	0	0	0	0	0	0	0	0	0	0	0	0	0	0	0	0	0	0	0	0	0	0	0	0	0	0	0	0	0	0	0
Bacteria	Bacteroidetes	Sphingobacteriia	Sphingobacteriales	Sphingobacteriaceae	Parapedobacter		2|976|117747|200666|84566|416949	0	0	0	0	0	0	0	0	0	0	0	0	0	0	0	0	0	0	0	0	0	0	0	0	0	0	0	0	0	0	0	0	0	0	0	0	0	0	0	0	0	0
Bacteria	Bacteroidetes	Sphingobacteriia	Sphingobacteriales	Sphingobacteriaceae	Parapedobacter	Parapedobacter_indicus	2|976|117747|200666|84566|416949|1477437	0	0	0	0	0	0	0	0	0	0	0	0	0	0	0	0	0	0	0	0	0	0	0	0	0	0	0	0	0	0	0	0	0	0	0	0	0	0	0	0	0	0
Bacteria	Bacteroidetes	Sphingobacteriia	Sphingobacteriales	Sphingobacteriaceae	Pedobacter		2|976|117747|200666|84566|84567	0	0	0	0	0	0	0	0	0	0	0	0	0.44365	0	0	0.01064	0	0	0	0	0	0	0	0	0	0	0	0	0	0	0	0	0	0	0	0	0	0	0	0	0	0
Bacteria	Bacteroidetes	Sphingobacteriia	Sphingobacteriales	Sphingobacteriaceae	Pedobacter	Pedobacter_himalayensis	2|976|117747|200666|84566|84567|246796	0	0	0	0	0	0	0	0	0	0	0	0	0	0	0	0	0	0	0	0	0	0	0	0	0	0	0	0	0	0	0	0	0	0	0	0	0	0	0	0	0	0
Bacteria	Bacteroidetes	Sphingobacteriia	Sphingobacteriales	Sphingobacteriaceae	Pedobacter	Pedobacter_luteus	2|976|117747|200666|84566|84567|572036	0	0	0	0	0	0	0	0	0	0	0	0	0	0	0	0	0	0	0	0	0	0	0	0	0	0	0	0	0	0	0	0	0	0	0	0	0	0	0	0	0	0
Bacteria	Bacteroidetes	Sphingobacteriia	Sphingobacteriales	Sphingobacteriaceae	Pedobacter	Pedobacter_sp_V48	2|976|117747|200666|84566|84567|509635	0	0	0	0	0	0	0	0	0	0	0	0	0	0	0	0	0	0	0	0	0	0	0	0	0	0	0	0	0	0	0	0	0	0	0	0	0	0	0	0	0	0
Bacteria	Bacteroidetes	Sphingobacteriia	Sphingobacteriales	Sphingobacteriaceae	Pedobacter	Pedobacter_sp_YR510	2|976|117747|200666|84566|84567|2135720	0	0	0	0	0	0	0	0	0	0	0	0	0.44365	0	0	0.01064	0	0	0	0	0	0	0	0	0	0	0	0	0	0	0	0	0	0	0	0	0	0	0	0	0	0
Bacteria	Bacteroidetes	Sphingobacteriia	Sphingobacteriales	Sphingobacteriaceae	Pedobacter	Pedobacter_steynii	2|976|117747|200666|84566|84567|430522	0	0	0	0	0	0	0	0	0	0	0	0	0	0	0	0	0	0	0	0	0	0	0	0	0	0	0	0	0	0	0	0	0	0	0	0	0	0	0	0	0	0
Bacteria	Bacteroidetes	Sphingobacteriia	Sphingobacteriales	Sphingobacteriaceae	Sphingobacteriaceae_unclassified			0	0	0	0	0	0	0	0	0	0	0	0	0.05906	0	0	0	0	0	0	0	0	0	0	0	0	0	0	0	0	0	0	0	0	0	0	0	0	0	0	0	0	0
Bacteria	Bacteroidetes	Sphingobacteriia	Sphingobacteriales	Sphingobacteriaceae	Sphingobacteriaceae_unclassified	Sphingobacteriaceae_bacterium_GW460_11_11_14_LB5	2|976|117747|200666|84566||1986952	0	0	0	0	0	0	0	0	0	0	0	0	0.05906	0	0	0	0	0	0	0	0	0	0	0	0	0	0	0	0	0	0	0	0	0	0	0	0	0	0	0	0	0
Bacteria	Bacteroidetes	Sphingobacteriia	Sphingobacteriales	Sphingobacteriaceae	Sphingobacterium		2|976|117747|200666|84566|28453	0	0	0	0	0	0.00596	0	0.0011	0.01488	0	0	0	0.54537	0	0	4.47016	0	0	0	0	0	0	0	0	0	0	0	0	0	0	0	0	0	0.08998	0	0	0	0	0	0	0	0
Bacteria	Bacteroidetes	Sphingobacteriia	Sphingobacteriales	Sphingobacteriaceae	Sphingobacterium	Sphingobacterium_cellulitidis	2|976|117747|200666|84566|28453|1768011	0	0	0	0	0	0.00068	0	0	0.00286	0	0	0	0	0	0	0.3248	0	0	0	0	0	0	0	0	0	0	0	0	0	0	0	0	0	0.00146	0	0	0	0	0	0	0	0
Bacteria	Bacteroidetes	Sphingobacteriia	Sphingobacteriales	Sphingobacteriaceae	Sphingobacterium	Sphingobacterium_deserti	2|976|117747|200666|84566|28453|1229276	0	0	0	0	0	0	0	0	0	0	0	0	0.24214	0	0	0	0	0	0	0	0	0	0	0	0	0	0	0	0	0	0	0	0	0	0	0	0	0	0	0	0	0
Bacteria	Bacteroidetes	Sphingobacteriia	Sphingobacteriales	Sphingobacteriaceae	Sphingobacterium	Sphingobacterium_faecium	2|976|117747|200666|84566|28453|34087	0	0	0	0	0	0	0	0	0	0	0	0	0	0	0	0	0	0	0	0	0	0	0	0	0	0	0	0	0	0	0	0	0	0	0	0	0	0	0	0	0	0
Bacteria	Bacteroidetes	Sphingobacteriia	Sphingobacteriales	Sphingobacteriaceae	Sphingobacterium	Sphingobacterium_lactis	2|976|117747|200666|84566|28453|797291	0	0	0	0	0	0	0	0	0.00277	0	0	0	0	0	0	0	0	0	0	0	0	0	0	0	0	0	0	0	0	0	0	0	0	0	0	0	0	0	0	0	0	0
Bacteria	Bacteroidetes	Sphingobacteriia	Sphingobacteriales	Sphingobacteriaceae	Sphingobacterium	Sphingobacterium_mizutaii	2|976|117747|200666|84566|28453|1010	0	0	0	0	0	0.00528	0	0.0011	0.00925	0	0	0	0.12418	0	0	4.06399	0	0	0	0	0	0	0	0	0	0	0	0	0	0	0	0	0	0.05575	0	0	0	0	0	0	0	0
Bacteria	Bacteroidetes	Sphingobacteriia	Sphingobacteriales	Sphingobacteriaceae	Sphingobacterium	Sphingobacterium_multivorum	2|976|117747|200666|84566|28453|28454	0	0	0	0	0	0	0	0	0	0	0	0	0	0	0	0	0	0	0	0	0	0	0	0	0	0	0	0	0	0	0	0	0	0	0	0	0	0	0	0	0	0
Bacteria	Bacteroidetes	Sphingobacteriia	Sphingobacteriales	Sphingobacteriaceae	Sphingobacterium	Sphingobacterium_nematocida	2|976|117747|200666|84566|28453|1513896	0	0	0	0	0	0	0	0	0	0	0	0	0	0	0	0.0501	0	0	0	0	0	0	0	0	0	0	0	0	0	0	0	0	0	0	0	0	0	0	0	0	0	0
Bacteria	Bacteroidetes	Sphingobacteriia	Sphingobacteriales	Sphingobacteriaceae	Sphingobacterium	Sphingobacterium_paucimobilis	2|976|117747|200666|84566|28453|1385985	0	0	0	0	0	0	0	0	0	0	0	0	0	0	0	0.00965	0	0	0	0	0	0	0	0	0	0	0	0	0	0	0	0	0	0.03277	0	0	0	0	0	0	0	0
Bacteria	Bacteroidetes	Sphingobacteriia	Sphingobacteriales	Sphingobacteriaceae	Sphingobacterium	Sphingobacterium_sp_21	2|976|117747|200666|84566|28453|743722	0	0	0	0	0	0	0	0	0	0	0	0	0	0	0	0.02163	0	0	0	0	0	0	0	0	0	0	0	0	0	0	0	0	0	0	0	0	0	0	0	0	0	0
Bacteria	Bacteroidetes	Sphingobacteriia	Sphingobacteriales	Sphingobacteriaceae	Sphingobacterium	Sphingobacterium_sp_B29	2|976|117747|200666|84566|28453|1933220	0	0	0	0	0	0	0	0	0	0	0	0	0	0	0	0	0	0	0	0	0	0	0	0	0	0	0	0	0	0	0	0	0	0	0	0	0	0	0	0	0	0
Bacteria	Bacteroidetes	Sphingobacteriia	Sphingobacteriales	Sphingobacteriaceae	Sphingobacterium	Sphingobacterium_spiritivorum	2|976|117747|200666|84566|28453|258	0	0	0	0	0	0	0	0	0	0	0	0	0.17905	0	0	0	0	0	0	0	0	0	0	0	0	0	0	0	0	0	0	0	0	0	0	0	0	0	0	0	0	0
Bacteria	Bacteroidetes	Sphingobacteriia	Sphingobacteriales	Sphingobacteriaceae	Sphingobacterium	Sphingobacterium_wenxiniae	2|976|117747|200666|84566|28453|683125	0	0	0	0	0	0	0	0	0	0	0	0	0	0	0	0	0	0	0	0	0	0	0	0	0	0	0	0	0	0	0	0	0	0	0	0	0	0	0	0	0	0
Bacteria	Bacteroidetes	Sphingobacteriia	Sphingobacteriales	Sphingobacteriales_unclassified				0	0	0	0	0	0	0	0	0	0	0	0	0	0	0	0	0	0	0	0	0	0	0	0	0	0	0	0	0	0	0	0	0	0	0	0	0	0	0	0	0	0
Bacteria	Bacteroidetes	Sphingobacteriia	Sphingobacteriales	Sphingobacteriales_unclassified	Sphingobacteriales_unclassified			0	0	0	0	0	0	0	0	0	0	0	0	0	0	0	0	0	0	0	0	0	0	0	0	0	0	0	0	0	0	0	0	0	0	0	0	0	0	0	0	0	0
Bacteria	Bacteroidetes	Sphingobacteriia	Sphingobacteriales	Sphingobacteriales_unclassified	Sphingobacteriales_unclassified	Sphingobacteriales_bacterium_44_61	2|976|117747|200666|||1895838	0	0	0	0	0	0	0	0	0	0	0	0	0	0	0	0	0	0	0	0	0	0	0	0	0	0	0	0	0	0	0	0	0	0	0	0	0	0	0	0	0	0
Bacteria	Candidatus_Melainabacteria						2|1798710	0.07834	0.07834	0.02691	0.14406	0.03972	0	0	0	0.01224	0	0	0	0	0	0	0	0	0	0	0	0	0	0	0	0	0	0	0	0	0	0	0	0	0	0	0	0	0	0	0	0	0
Bacteria	Candidatus_Melainabacteria	Candidatus_Melainabacteria_unclassified						0.07834	0.07834	0.02691	0.14406	0.03972	0	0	0	0.01224	0	0	0	0	0	0	0	0	0	0	0	0	0	0	0	0	0	0	0	0	0	0	0	0	0	0	0	0	0	0	0	0	0
Bacteria	Candidatus_Melainabacteria	Candidatus_Melainabacteria_unclassified					2|1798710|	0	0	0	0	0	0	0	0	0	0	0	0	0	0	0	0	0	0	0	0	0	0	0	0	0	0	0	0	0	0	0	0	0	0	0	0	0	0	0	0	0	0
Bacteria	Candidatus_Melainabacteria	Candidatus_Melainabacteria_unclassified	Candidatus_Gastranaerophilales				2|1798710||1906119	0.07834	0.07834	0.02691	0.14406	0.03972	0	0	0	0.01224	0	0	0	0	0	0	0	0	0	0	0	0	0	0	0	0	0	0	0	0	0	0	0	0	0	0	0	0	0	0	0	0	0
Bacteria	Candidatus_Melainabacteria	Candidatus_Melainabacteria_unclassified	Candidatus_Gastranaerophilales	Candidatus_Gastranaerophilales_unclassified				0.07834	0.07834	0.02691	0.14406	0.03972	0	0	0	0.01224	0	0	0	0	0	0	0	0	0	0	0	0	0	0	0	0	0	0	0	0	0	0	0	0	0	0	0	0	0	0	0	0	0
Bacteria	Candidatus_Melainabacteria	Candidatus_Melainabacteria_unclassified	Candidatus_Gastranaerophilales	Candidatus_Gastranaerophilales_unclassified			2|1798710||1906119|	0	0	0	0	0	0	0	0	0	0	0	0	0	0	0	0	0	0	0	0	0	0	0	0	0	0	0	0	0	0	0	0	0	0	0	0	0	0	0	0	0	0
Bacteria	Candidatus_Melainabacteria	Candidatus_Melainabacteria_unclassified	Candidatus_Gastranaerophilales	Candidatus_Gastranaerophilales_unclassified	Candidatus_Gastranaerophilales_unclassified			0.07834	0.07834	0.02691	0.14406	0.03972	0	0	0	0.01224	0	0	0	0	0	0	0	0	0	0	0	0	0	0	0	0	0	0	0	0	0	0	0	0	0	0	0	0	0	0	0	0	0
Bacteria	Candidatus_Melainabacteria	Candidatus_Melainabacteria_unclassified	Candidatus_Gastranaerophilales	Candidatus_Gastranaerophilales_unclassified	Candidatus_Gastranaerophilales_unclassified		2|1798710||1906119||	0	0	0	0	0	0	0	0	0	0	0	0	0	0	0	0	0	0	0	0	0	0	0	0	0	0	0	0	0	0	0	0	0	0	0	0	0	0	0	0	0	0
Bacteria	Candidatus_Melainabacteria	Candidatus_Melainabacteria_unclassified	Candidatus_Gastranaerophilales	Candidatus_Gastranaerophilales_unclassified	Candidatus_Gastranaerophilales_unclassified	Candidatus_Gastranaerophilales_bacterium	2|1798710||1906119|||2137880	0.07834	0.07834	0.02691	0.14406	0.03972	0	0	0	0.01224	0	0	0	0	0	0	0	0	0	0	0	0	0	0	0	0	0	0	0	0	0	0	0	0	0	0	0	0	0	0	0	0	0
Bacteria	Chlamydiae						2|204428	0	0	0	0	0	0	0	0	0	0	82.80728	91.62	0	0	0	0	0	0	0	0	0.46309	0	0	0	0	0	0	0	0	0	0	0	0	0	0	0	0	0	0	96.9282	86.79462	92.65346
Bacteria	Chlamydiae	Chlamydiia					2|204428|204429	0	0	0	0	0	0	0	0	0	0	82.80728	91.62	0	0	0	0	0	0	0	0	0.46309	0	0	0	0	0	0	0	0	0	0	0	0	0	0	0	0	0	0	96.9282	86.79462	92.65346
Bacteria	Chlamydiae	Chlamydiia	Chlamydiales				2|204428|204429|51291	0	0	0	0	0	0	0	0	0	0	82.80728	91.62	0	0	0	0	0	0	0	0	0.46309	0	0	0	0	0	0	0	0	0	0	0	0	0	0	0	0	0	0	96.9282	86.79462	92.65346
Bacteria	Chlamydiae	Chlamydiia	Chlamydiales	Chlamydiaceae			2|204428|204429|51291|809	0	0	0	0	0	0	0	0	0	0	82.80728	91.62	0	0	0	0	0	0	0	0	0.46309	0	0	0	0	0	0	0	0	0	0	0	0	0	0	0	0	0	0	96.9282	86.79462	92.65346
Bacteria	Chlamydiae	Chlamydiia	Chlamydiales	Chlamydiaceae	Chlamydia		2|204428|204429|51291|809|810	0	0	0	0	0	0	0	0	0	0	82.80728	91.62	0	0	0	0	0	0	0	0	0.46309	0	0	0	0	0	0	0	0	0	0	0	0	0	0	0	0	0	0	96.9282	86.79462	92.65346
Bacteria	Chlamydiae	Chlamydiia	Chlamydiales	Chlamydiaceae	Chlamydia	Chlamydia_ibidis	2|204428|204429|51291|809|810|1405396	0	0	0	0	0	0	0	0	0	0	82.80728	91.62	0	0	0	0	0	0	0	0	0.46309	0	0	0	0	0	0	0	0	0	0	0	0	0	0	0	0	0	0	96.9282	86.79462	92.65346
Bacteria	Chlamydiae	Chlamydiia	Parachlamydiales				2|204428|204429|1963360	0	0	0	0	0	0	0	0	0	0	0	0	0	0	0	0	0	0	0	0	0	0	0	0	0	0	0	0	0	0	0	0	0	0	0	0	0	0	0	0	0	0
Bacteria	Chlamydiae	Chlamydiia	Parachlamydiales	Criblamydiaceae			2|204428|204429|1963360|412447	0	0	0	0	0	0	0	0	0	0	0	0	0	0	0	0	0	0	0	0	0	0	0	0	0	0	0	0	0	0	0	0	0	0	0	0	0	0	0	0	0	0
Bacteria	Chlamydiae	Chlamydiia	Parachlamydiales	Criblamydiaceae	Estrella		2|204428|204429|1963360|412447|483422	0	0	0	0	0	0	0	0	0	0	0	0	0	0	0	0	0	0	0	0	0	0	0	0	0	0	0	0	0	0	0	0	0	0	0	0	0	0	0	0	0	0
Bacteria	Chlamydiae	Chlamydiia	Parachlamydiales	Criblamydiaceae	Estrella	Estrella_lausannensis	2|204428|204429|1963360|412447|483422|483423	0	0	0	0	0	0	0	0	0	0	0	0	0	0	0	0	0	0	0	0	0	0	0	0	0	0	0	0	0	0	0	0	0	0	0	0	0	0	0	0	0	0
Bacteria	Chloroflexi						2|200795	0	0	0	0	0	0	0	0	0	0	0	0	0	0	0	0.07259	0	0	0	0	0	0	0	0	0	0	0	0	0	0	0	0	0	0	0	0	0	0	0	0	0	0
Bacteria	Chloroflexi	Chloroflexi_unclassified					2|200795|	0	0	0	0	0	0	0	0	0	0	0	0	0	0	0	0	0	0	0	0	0	0	0	0	0	0	0	0	0	0	0	0	0	0	0	0	0	0	0	0	0	0
Bacteria	Chloroflexi	Chloroflexi_unclassified	Chloroflexi_unclassified				2|200795||	0	0	0	0	0	0	0	0	0	0	0	0	0	0	0	0	0	0	0	0	0	0	0	0	0	0	0	0	0	0	0	0	0	0	0	0	0	0	0	0	0	0
Bacteria	Chloroflexi	Chloroflexi_unclassified	Chloroflexi_unclassified	Chloroflexi_unclassified			2|200795|||	0	0	0	0	0	0	0	0	0	0	0	0	0	0	0	0	0	0	0	0	0	0	0	0	0	0	0	0	0	0	0	0	0	0	0	0	0	0	0	0	0	0
Bacteria	Chloroflexi	Chloroflexi_unclassified	Chloroflexi_unclassified	Chloroflexi_unclassified	Chloroflexi_unclassified		2|200795||||	0	0	0	0	0	0	0	0	0	0	0	0	0	0	0	0	0	0	0	0	0	0	0	0	0	0	0	0	0	0	0	0	0	0	0	0	0	0	0	0	0	0
Bacteria	Chloroflexi	Chloroflexi_unclassified	Chloroflexi_unclassified	Chloroflexi_unclassified	Chloroflexi_unclassified	Chloroflexi_bacterium_44_23	2|200795|||||1895927	0	0	0	0	0	0	0	0	0	0	0	0	0	0	0	0	0	0	0	0	0	0	0	0	0	0	0	0	0	0	0	0	0	0	0	0	0	0	0	0	0	0
Bacteria	Chloroflexi	Chloroflexi_unclassified	Chloroflexi_unclassified	Chloroflexi_unclassified	Chloroflexi_unclassified	Chloroflexi_bacterium_54_19	2|200795|||||1895928	0	0	0	0	0	0	0	0	0	0	0	0	0	0	0	0	0	0	0	0	0	0	0	0	0	0	0	0	0	0	0	0	0	0	0	0	0	0	0	0	0	0
Bacteria	Chloroflexi	Chloroflexia					2|200795|32061	0	0	0	0	0	0	0	0	0	0	0	0	0	0	0	0	0	0	0	0	0	0	0	0	0	0	0	0	0	0	0	0	0	0	0	0	0	0	0	0	0	0
Bacteria	Chloroflexi	Chloroflexia	Chloroflexales				2|200795|32061|32064	0	0	0	0	0	0	0	0	0	0	0	0	0	0	0	0	0	0	0	0	0	0	0	0	0	0	0	0	0	0	0	0	0	0	0	0	0	0	0	0	0	0
Bacteria	Chloroflexi	Chloroflexia	Chloroflexales	Roseiflexaceae			2|200795|32061|32064|1508635	0	0	0	0	0	0	0	0	0	0	0	0	0	0	0	0	0	0	0	0	0	0	0	0	0	0	0	0	0	0	0	0	0	0	0	0	0	0	0	0	0	0
Bacteria	Chloroflexi	Chloroflexia	Chloroflexales	Roseiflexaceae	Kouleothrix		2|200795|32061|32064|1508635|186475	0	0	0	0	0	0	0	0	0	0	0	0	0	0	0	0	0	0	0	0	0	0	0	0	0	0	0	0	0	0	0	0	0	0	0	0	0	0	0	0	0	0
Bacteria	Chloroflexi	Chloroflexia	Chloroflexales	Roseiflexaceae	Kouleothrix	Kouleothrix_aurantiaca	2|200795|32061|32064|1508635|186475|186479	0	0	0	0	0	0	0	0	0	0	0	0	0	0	0	0	0	0	0	0	0	0	0	0	0	0	0	0	0	0	0	0	0	0	0	0	0	0	0	0	0	0
Bacteria	Chloroflexi	Thermomicrobia					2|200795|189775	0	0	0	0	0	0	0	0	0	0	0	0	0	0	0	0.07259	0	0	0	0	0	0	0	0	0	0	0	0	0	0	0	0	0	0	0	0	0	0	0	0	0	0
Bacteria	Chloroflexi	Thermomicrobia	Sphaerobacterales				2|200795|189775|85001	0	0	0	0	0	0	0	0	0	0	0	0	0	0	0	0.07259	0	0	0	0	0	0	0	0	0	0	0	0	0	0	0	0	0	0	0	0	0	0	0	0	0	0
Bacteria	Chloroflexi	Thermomicrobia	Sphaerobacterales	Sphaerobacteraceae			2|200795|189775|85001|85002	0	0	0	0	0	0	0	0	0	0	0	0	0	0	0	0.07259	0	0	0	0	0	0	0	0	0	0	0	0	0	0	0	0	0	0	0	0	0	0	0	0	0	0
Bacteria	Chloroflexi	Thermomicrobia	Sphaerobacterales	Sphaerobacteraceae	Nitrolancea		2|200795|189775|85001|85002|1206748	0	0	0	0	0	0	0	0	0	0	0	0	0	0	0	0	0	0	0	0	0	0	0	0	0	0	0	0	0	0	0	0	0	0	0	0	0	0	0	0	0	0
Bacteria	Chloroflexi	Thermomicrobia	Sphaerobacterales	Sphaerobacteraceae	Nitrolancea	Nitrolancea_hollandica	2|200795|189775|85001|85002|1206748|1206749	0	0	0	0	0	0	0	0	0	0	0	0	0	0	0	0	0	0	0	0	0	0	0	0	0	0	0	0	0	0	0	0	0	0	0	0	0	0	0	0	0	0
Bacteria	Chloroflexi	Thermomicrobia	Sphaerobacterales	Sphaerobacteraceae	Sphaerobacter		2|200795|189775|85001|85002|2056	0	0	0	0	0	0	0	0	0	0	0	0	0	0	0	0.07259	0	0	0	0	0	0	0	0	0	0	0	0	0	0	0	0	0	0	0	0	0	0	0	0	0	0
Bacteria	Chloroflexi	Thermomicrobia	Sphaerobacterales	Sphaerobacteraceae	Sphaerobacter	Sphaerobacter_thermophilus	2|200795|189775|85001|85002|2056|2057	0	0	0	0	0	0	0	0	0	0	0	0	0	0	0	0.07259	0	0	0	0	0	0	0	0	0	0	0	0	0	0	0	0	0	0	0	0	0	0	0	0	0	0
Bacteria	Cyanobacteria						2|1117	0	0	0	0	0	0	0	0	0	0	0	0	1.0288	7.44399	1.83545	0	0	0	0	0	0	0	0	0	0	0	0	0	0	0	0	0	0	0	0	0	0	0	0	0	0	0
Bacteria	Cyanobacteria	Cyanobacteria_unclassified						0	0	0	0	0	0	0	0	0	0	0	0	1.0288	7.44399	1.83545	0	0	0	0	0	0	0	0	0	0	0	0	0	0	0	0	0	0	0	0	0	0	0	0	0	0	0
Bacteria	Cyanobacteria	Cyanobacteria_unclassified					2|1117|	0	0	0	0	0	0	0	0	0	0	0	0	0	0	0	0	0	0	0	0	0	0	0	0	0	0	0	0	0	0	0	0	0	0	0	0	0	0	0	0	0	0
Bacteria	Cyanobacteria	Cyanobacteria_unclassified	Chroococcidiopsidales				2|1117||1890505	0	0	0	0	0	0	0	0	0	0	0	0	0	0.03287	0	0	0	0	0	0	0	0	0	0	0	0	0	0	0	0	0	0	0	0	0	0	0	0	0	0	0	0
Bacteria	Cyanobacteria	Cyanobacteria_unclassified	Chroococcidiopsidales	Chroococcidiopsidaceae			2|1117||1890505|1890528	0	0	0	0	0	0	0	0	0	0	0	0	0	0.03287	0	0	0	0	0	0	0	0	0	0	0	0	0	0	0	0	0	0	0	0	0	0	0	0	0	0	0	0
Bacteria	Cyanobacteria	Cyanobacteria_unclassified	Chroococcidiopsidales	Chroococcidiopsidaceae	Chroococcidiopsis		2|1117||1890505|1890528|54298	0	0	0	0	0	0	0	0	0	0	0	0	0	0.03287	0	0	0	0	0	0	0	0	0	0	0	0	0	0	0	0	0	0	0	0	0	0	0	0	0	0	0	0
Bacteria	Cyanobacteria	Cyanobacteria_unclassified	Chroococcidiopsidales	Chroococcidiopsidaceae	Chroococcidiopsis	Chroococcidiopsis_thermalis	2|1117||1890505|1890528|54298|54299	0	0	0	0	0	0	0	0	0	0	0	0	0	0.03287	0	0	0	0	0	0	0	0	0	0	0	0	0	0	0	0	0	0	0	0	0	0	0	0	0	0	0	0
Bacteria	Cyanobacteria	Cyanobacteria_unclassified	Cyanobacteria_unclassified					0	0	0	0	0	0	0	0	0	0	0	0	0	0	0	0	0	0	0	0	0	0	0	0	0	0	0	0	0	0	0	0	0	0	0	0	0	0	0	0	0	0
Bacteria	Cyanobacteria	Cyanobacteria_unclassified	Cyanobacteria_unclassified	Cyanobacteria_unclassified				0	0	0	0	0	0	0	0	0	0	0	0	0	0	0	0	0	0	0	0	0	0	0	0	0	0	0	0	0	0	0	0	0	0	0	0	0	0	0	0	0	0
Bacteria	Cyanobacteria	Cyanobacteria_unclassified	Cyanobacteria_unclassified	Cyanobacteria_unclassified	Cyanobacteria_unclassified			0	0	0	0	0	0	0	0	0	0	0	0	0	0	0	0	0	0	0	0	0	0	0	0	0	0	0	0	0	0	0	0	0	0	0	0	0	0	0	0	0	0
Bacteria	Cyanobacteria	Cyanobacteria_unclassified	Cyanobacteria_unclassified	Cyanobacteria_unclassified	Cyanobacteria_unclassified	filamentous_cyanobacterium_Phorm_6	2|1117|||||2107706	0	0	0	0	0	0	0	0	0	0	0	0	0	0	0	0	0	0	0	0	0	0	0	0	0	0	0	0	0	0	0	0	0	0	0	0	0	0	0	0	0	0
Bacteria	Cyanobacteria	Cyanobacteria_unclassified	Nostocales				2|1117||1161	0	0	0	0	0	0	0	0	0	0	0	0	0	0	0	0	0	0	0	0	0	0	0	0	0	0	0	0	0	0	0	0	0	0	0	0	0	0	0	0	0	0
Bacteria	Cyanobacteria	Cyanobacteria_unclassified	Nostocales	Tolypothrichaceae			2|1117||1161|119859	0	0	0	0	0	0	0	0	0	0	0	0	0	0	0	0	0	0	0	0	0	0	0	0	0	0	0	0	0	0	0	0	0	0	0	0	0	0	0	0	0	0
Bacteria	Cyanobacteria	Cyanobacteria_unclassified	Nostocales	Tolypothrichaceae	Tolypothrix		2|1117||1161|119859|111782	0	0	0	0	0	0	0	0	0	0	0	0	0	0	0	0	0	0	0	0	0	0	0	0	0	0	0	0	0	0	0	0	0	0	0	0	0	0	0	0	0	0
Bacteria	Cyanobacteria	Cyanobacteria_unclassified	Nostocales	Tolypothrichaceae	Tolypothrix	Tolypothrix_campylonemoides	2|1117||1161|119859|111782|1136105	0	0	0	0	0	0	0	0	0	0	0	0	0	0	0	0	0	0	0	0	0	0	0	0	0	0	0	0	0	0	0	0	0	0	0	0	0	0	0	0	0	0
Bacteria	Cyanobacteria	Cyanobacteria_unclassified	Oscillatoriales				2|1117||1150	0	0	0	0	0	0	0	0	0	0	0	0	1.0288	1.86661	1.83545	0	0	0	0	0	0	0	0	0	0	0	0	0	0	0	0	0	0	0	0	0	0	0	0	0	0	0
Bacteria	Cyanobacteria	Cyanobacteria_unclassified	Oscillatoriales	Coleofasciculaceae			2|1117||1150|1892251	0	0	0	0	0	0	0	0	0	0	0	0	0	0.02694	0	0	0	0	0	0	0	0	0	0	0	0	0	0	0	0	0	0	0	0	0	0	0	0	0	0	0	0
Bacteria	Cyanobacteria	Cyanobacteria_unclassified	Oscillatoriales	Coleofasciculaceae	Geitlerinema		2|1117||1150|1892251|63132	0	0	0	0	0	0	0	0	0	0	0	0	0	0.02694	0	0	0	0	0	0	0	0	0	0	0	0	0	0	0	0	0	0	0	0	0	0	0	0	0	0	0	0
Bacteria	Cyanobacteria	Cyanobacteria_unclassified	Oscillatoriales	Coleofasciculaceae	Geitlerinema	Geitlerinema_sp_PCC_7407	2|1117||1150|1892251|63132|1173025	0	0	0	0	0	0	0	0	0	0	0	0	0	0.02694	0	0	0	0	0	0	0	0	0	0	0	0	0	0	0	0	0	0	0	0	0	0	0	0	0	0	0	0
Bacteria	Cyanobacteria	Cyanobacteria_unclassified	Oscillatoriales	Microcoleaceae			2|1117||1150|1892252	0	0	0	0	0	0	0	0	0	0	0	0	0.95093	0.84385	1.55273	0	0	0	0	0	0	0	0	0	0	0	0	0	0	0	0	0	0	0	0	0	0	0	0	0	0	0
Bacteria	Cyanobacteria	Cyanobacteria_unclassified	Oscillatoriales	Microcoleaceae	Microcoleus		2|1117||1150|1892252|44471	0	0	0	0	0	0	0	0	0	0	0	0	0.95093	0.84385	1.55273	0	0	0	0	0	0	0	0	0	0	0	0	0	0	0	0	0	0	0	0	0	0	0	0	0	0	0
Bacteria	Cyanobacteria	Cyanobacteria_unclassified	Oscillatoriales	Microcoleaceae	Microcoleus	Microcoleus_sp_PCC_7113	2|1117||1150|1892252|44471|1173027	0	0	0	0	0	0	0	0	0	0	0	0	0.24709	0.84385	1.28873	0	0	0	0	0	0	0	0	0	0	0	0	0	0	0	0	0	0	0	0	0	0	0	0	0	0	0
Bacteria	Cyanobacteria	Cyanobacteria_unclassified	Oscillatoriales	Microcoleaceae	Microcoleus	Microcoleus_vaginatus	2|1117||1150|1892252|44471|119532	0	0	0	0	0	0	0	0	0	0	0	0	0.70384	0	0.264	0	0	0	0	0	0	0	0	0	0	0	0	0	0	0	0	0	0	0	0	0	0	0	0	0	0	0
Bacteria	Cyanobacteria	Cyanobacteria_unclassified	Oscillatoriales	Oscillatoriaceae			2|1117||1150|1892254	0	0	0	0	0	0	0	0	0	0	0	0	0.07786	0.99582	0.28272	0	0	0	0	0	0	0	0	0	0	0	0	0	0	0	0	0	0	0	0	0	0	0	0	0	0	0
Bacteria	Cyanobacteria	Cyanobacteria_unclassified	Oscillatoriales	Oscillatoriaceae	Oscillatoria		2|1117||1150|1892254|1158	0	0	0	0	0	0	0	0	0	0	0	0	0.07786	0.36933	0.19486	0	0	0	0	0	0	0	0	0	0	0	0	0	0	0	0	0	0	0	0	0	0	0	0	0	0	0
Bacteria	Cyanobacteria	Cyanobacteria_unclassified	Oscillatoriales	Oscillatoriaceae	Oscillatoria	Oscillatoria_acuminata	2|1117||1150|1892254|1158|118323	0	0	0	0	0	0	0	0	0	0	0	0	0	0.36933	0	0	0	0	0	0	0	0	0	0	0	0	0	0	0	0	0	0	0	0	0	0	0	0	0	0	0	0
Bacteria	Cyanobacteria	Cyanobacteria_unclassified	Oscillatoriales	Oscillatoriaceae	Oscillatoria	Oscillatoria_nigro_viridis	2|1117||1150|1892254|1158|482564	0	0	0	0	0	0	0	0	0	0	0	0	0.07786	0	0.19486	0	0	0	0	0	0	0	0	0	0	0	0	0	0	0	0	0	0	0	0	0	0	0	0	0	0	0
Bacteria	Cyanobacteria	Cyanobacteria_unclassified	Oscillatoriales	Oscillatoriaceae	Phormidium		2|1117||1150|1892254|1198	0	0	0	0	0	0	0	0	0	0	0	0	0	0.6265	0.08787	0	0	0	0	0	0	0	0	0	0	0	0	0	0	0	0	0	0	0	0	0	0	0	0	0	0	0
Bacteria	Cyanobacteria	Cyanobacteria_unclassified	Oscillatoriales	Oscillatoriaceae	Phormidium	Phormidium_ambiguum	2|1117||1150|1892254|1198|71191	0	0	0	0	0	0	0	0	0	0	0	0	0	0.6265	0	0	0	0	0	0	0	0	0	0	0	0	0	0	0	0	0	0	0	0	0	0	0	0	0	0	0	0
Bacteria	Cyanobacteria	Cyanobacteria_unclassified	Oscillatoriales	Oscillatoriaceae	Phormidium	Phormidium_tenue	2|1117||1150|1892254|1198|126344	0	0	0	0	0	0	0	0	0	0	0	0	0	0	0.08787	0	0	0	0	0	0	0	0	0	0	0	0	0	0	0	0	0	0	0	0	0	0	0	0	0	0	0
Bacteria	Cyanobacteria	Cyanobacteria_unclassified	Synechococcales				2|1117||1890424	0	0	0	0	0	0	0	0	0	0	0	0	0	5.54452	0	0	0	0	0	0	0	0	0	0	0	0	0	0	0	0	0	0	0	0	0	0	0	0	0	0	0	0
Bacteria	Cyanobacteria	Cyanobacteria_unclassified	Synechococcales	Leptolyngbyaceae			2|1117||1890424|1890438	0	0	0	0	0	0	0	0	0	0	0	0	0	5.54452	0	0	0	0	0	0	0	0	0	0	0	0	0	0	0	0	0	0	0	0	0	0	0	0	0	0	0	0
Bacteria	Cyanobacteria	Cyanobacteria_unclassified	Synechococcales	Leptolyngbyaceae	Leptolyngbya		2|1117||1890424|1890438|47251	0	0	0	0	0	0	0	0	0	0	0	0	0	5.54452	0	0	0	0	0	0	0	0	0	0	0	0	0	0	0	0	0	0	0	0	0	0	0	0	0	0	0	0
Bacteria	Cyanobacteria	Cyanobacteria_unclassified	Synechococcales	Leptolyngbyaceae	Leptolyngbya	Leptolyngbya_sp_NIES_2104	2|1117||1890424|1890438|47251|1552121	0	0	0	0	0	0	0	0	0	0	0	0	0	5.54452	0	0	0	0	0	0	0	0	0	0	0	0	0	0	0	0	0	0	0	0	0	0	0	0	0	0	0	0
Bacteria	Deinococcus-Thermus						2|1297	0	0	0	0	0	0	0	0	0	0	0	0	0	0.23234	0.20478	0	0	0	0	0	0	0	0	0	0	0	0	0	0	0	0	0	0	0	0	0	0	0	0	0	0	0
Bacteria	Deinococcus-Thermus	Deinococci					2|1297|188787	0	0	0	0	0	0	0	0	0	0	0	0	0	0.23234	0.20478	0	0	0	0	0	0	0	0	0	0	0	0	0	0	0	0	0	0	0	0	0	0	0	0	0	0	0
Bacteria	Deinococcus-Thermus	Deinococci	Deinococcales				2|1297|188787|118964	0	0	0	0	0	0	0	0	0	0	0	0	0	0.23234	0.20478	0	0	0	0	0	0	0	0	0	0	0	0	0	0	0	0	0	0	0	0	0	0	0	0	0	0	0
Bacteria	Deinococcus-Thermus	Deinococci	Deinococcales	Deinococcaceae			2|1297|188787|118964|183710	0	0	0	0	0	0	0	0	0	0	0	0	0	0.23234	0.20478	0	0	0	0	0	0	0	0	0	0	0	0	0	0	0	0	0	0	0	0	0	0	0	0	0	0	0
Bacteria	Deinococcus-Thermus	Deinococci	Deinococcales	Deinococcaceae	Deinococcus		2|1297|188787|118964|183710|1298	0	0	0	0	0	0	0	0	0	0	0	0	0	0.23234	0.20478	0	0	0	0	0	0	0	0	0	0	0	0	0	0	0	0	0	0	0	0	0	0	0	0	0	0	0
Bacteria	Deinococcus-Thermus	Deinococci	Deinococcales	Deinococcaceae	Deinococcus	Deinococcus_swuensis	2|1297|188787|118964|183710|1298|1182571	0	0	0	0	0	0	0	0	0	0	0	0	0	0.23234	0.20478	0	0	0	0	0	0	0	0	0	0	0	0	0	0	0	0	0	0	0	0	0	0	0	0	0	0	0
Bacteria	Deinococcus_Thermus						2|1297	0	0	0	0	0	0	0	0	0	0	0	0	0	0.23666	0.38032	0	0	0	0	0	0	0	0	0	0	0	0	0	0	0	0	0	0	0	0	0	0	0	0	0	0	0
Bacteria	Deinococcus_Thermus	Deinococci	Deinococcales	Deinococcaceae	Deinococcus	Deinococcus_actinosclerus	2|1297|188787|118964|183710|1298|1768108	0	0	0	0	0	0	0	0	0	0	0	0	0	0	0	0	0	0	0	0	0	0	0	0	0	0	0	0	0	0	0	0	0	0	0	0	0	0	0	0	0	0
Bacteria	Deinococcus_Thermus	Deinococci	Deinococcales	Deinococcaceae	Deinococcus	Deinococcus_ficus	2|1297|188787|118964|183710|1298|317577	0	0	0	0	0	0	0	0	0	0	0	0	0	0.23666	0.38032	0	0	0	0	0	0	0	0	0	0	0	0	0	0	0	0	0	0	0	0	0	0	0	0	0	0	0
Bacteria	Deinococcus_Thermus	Deinococci	Deinococcales	Deinococcaceae	Deinococcus	Deinococcus_grandis	2|1297|188787|118964|183710|1298|57498	0	0	0	0	0	0	0	0	0	0	0	0	0	0	0	0	0	0	0	0	0	0	0	0	0	0	0	0	0	0	0	0	0	0	0	0	0	0	0	0	0	0
Bacteria	Deinococcus_Thermus	Deinococci	Deinococcales	Deinococcaceae	Deinococcus	Deinococcus_indicus	2|1297|188787|118964|183710|1298|223556	0	0	0	0	0	0	0	0	0	0	0	0	0	0	0	0	0	0	0	0	0	0	0	0	0	0	0	0	0	0	0	0	0	0	0	0	0	0	0	0	0	0
Bacteria	Deinococcus_Thermus	Deinococci	Deinococcales	Deinococcaceae	Deinococcus	Deinococcus_soli_Cha_et_al_2016	2|1297|188787|118964|183710|1298|1309411	0	0	0	0	0	0	0	0	0	0	0	0	0	0	0	0	0	0	0	0	0	0	0	0	0	0	0	0	0	0	0	0	0	0	0	0	0	0	0	0	0	0
Bacteria	Deinococcus_Thermus	Deinococci	Thermales	Thermaceae	Thermus		2|1297|188787|68933|188786|270	0	0	0	0	0	0	0	0	0	0	0	0	0	0	0	0	0	0	0	0	0	0	0	0	0	0	0	0	0	0	0	0	0	0	0	0	0	0	0	0	0	0
Bacteria	Deinococcus_Thermus	Deinococci	Thermales	Thermaceae	Thermus	Thermus_parvatiensis	2|1297|188787|68933|188786|270|456163	0	0	0	0	0	0	0	0	0	0	0	0	0	0	0	0	0	0	0	0	0	0	0	0	0	0	0	0	0	0	0	0	0	0	0	0	0	0	0	0	0	0
Bacteria	Deinococcus_Thermus	Deinococci	Thermales	Thermaceae	Thermus	Thermus_thermophilus	2|1297|188787|68933|188786|270|274	0	0	0	0	0	0	0	0	0	0	0	0	0	0	0	0	0	0	0	0	0	0	0	0	0	0	0	0	0	0	0	0	0	0	0	0	0	0	0	0	0	0
Bacteria	Firmicutes						2|1239	36.96193	36.96193	58.35073	30.9358	55.29673	60.86937	48.70309	59.73154	60.87015	44.80244	1.47281	0.01022	0	0.23304	3.90473	12.91915	3.57285	0	0	16.48871	0	7.72874	1.29511	6.50541	78.06244	43.38807	18.50148	57.41592	87.43596	85.14676	81.88817	76.301	71.87668	75.54901	50.75274	57.01721	56.42335	49.23704	56.68186	0	0	0
Bacteria	Firmicutes	Bacilli					2|1239|91061	11.23249	11.23249	36.46664	11.67066	32.27573	51.22407	37.10313	50.65861	46.77427	33.08766	1.17226	0.01022	0	0.11263	3.90473	11.7696	3.57285	0	0	16.48871	0	7.72874	1.29511	3.55096	76.81018	40.35513	10.15778	52.53312	86.47682	82.44964	79.9204	75.47804	69.44304	74.45424	49.56371	52.5114	54.51897	43.1612	55.35386	0	0	0
Bacteria	Firmicutes	Bacilli	Bacillales				2|1239|91061|1385	0.01613	0.01613	0.13535	0.0398	0.08885	0.85396	0.25902	0.35028	0.67631	0.2929	0	0	0	0.11263	2.11048	0.88095	3.57285	0	0	15.62546	0	0	1.29511	0	0.62917	3.96594	1.28913	0.23145	0.01015	0.6059	0.45446	0.12898	0.51988	3.00723	9.31313	1.0308	0.10609	1.97685	0.27301	0	0	0
Bacteria	Firmicutes	Bacilli	Bacillales	Bacillaceae			2|1239|91061|1385|186817	0	0	0	0	0	0.01169	0.00585	0.01416	0.01153	0.00468	0	0	0	0	0	0	3.57285	0	0	13.01317	0	0	1.29511	0	0.51496	3.87233	1.24301	0.00417	0.00758	0.03341	0.05644	0.00871	0.08768	0.01295	0.21987	0.01011	0.00087	1.0355	0.19826	0	0	0
Bacteria	Firmicutes	Bacilli	Bacillales	Bacillaceae	Anoxybacillus		2|1239|91061|1385|186817|150247	0	0	0	0	0	0	0	0	0	0	0	0	0	0	0	0	3.57285	0	0	13.01317	0	0	1.29511	0	0	0	0	0	0	0	0	0	0	0	0	0	0	0	0	0	0	0
Bacteria	Firmicutes	Bacilli	Bacillales	Bacillaceae	Anoxybacillus	Anoxybacillus_flavithermus	2|1239|91061|1385|186817|150247|33934	0	0	0	0	0	0	0	0	0	0	0	0	0	0	0	0	3.57285	0	0	13.01317	0	0	1.29511	0	0	0	0	0	0	0	0	0	0	0	0	0	0	0	0	0	0	0
Bacteria	Firmicutes	Bacilli	Bacillales	Bacillaceae	Anoxybacillus	Anoxybacillus_pushchinoensis	2|1239|91061|1385|186817|150247|150248	0	0	0	0	0	0	0	0	0	0	0	0	0	0	0	0	0	0	0	0	0	0	0	0	0	0	0	0	0	0	0	0	0	0	0	0	0	0	0	0	0	0
Bacteria	Firmicutes	Bacilli	Bacillales	Bacillaceae	Anoxybacillus	Anoxybacillus_suryakundensis	2|1239|91061|1385|186817|150247|1325335	0	0	0	0	0	0	0	0	0	0	0	0	0	0	0	0	0	0	0	0	0	0	0	0	0	0	0	0	0	0	0	0	0	0	0	0	0	0	0	0	0	0
Bacteria	Firmicutes	Bacilli	Bacillales	Bacillaceae	Bacillus		2|1239|91061|1385|186817|1386	0	0	0	0	0	0	0	0	0	0	0	0	0	0	0	0	0	0	0	0	0	0	0	0	0	0	0	0	0	0	0	0	0	0	0.00025	0	0	0	0.0009	0	0	0
Bacteria	Firmicutes	Bacilli	Bacillales	Bacillaceae	Bacillus	Bacillus_aryabhattai	2|1239|91061|1385|186817|1386|412384	0	0	0	0	0	0	0	0	0	0	0	0	0	0	0	0	0	0	0	0	0	0	0	0	0	0	0	0	0	0	0	0	0	0	0	0	0	0	0	0	0	0
Bacteria	Firmicutes	Bacilli	Bacillales	Bacillaceae	Bacillus	Bacillus_cereus_group	2|1239|91061|1385|186817|1386|86661	0	0	0	0	0	0	0	0	0	0	0	0	0	0	0	0	0	0	0	0	0	0	0	0	0	0	0	0	0	0	0	0	0	0	0	0	0	0	0	0	0	0
Bacteria	Firmicutes	Bacilli	Bacillales	Bacillaceae	Bacillus	Bacillus_circulans	2|1239|91061|1385|186817|1386|1397	0	0	0	0	0	0	0	0	0	0	0	0	0	0	0	0	0	0	0	0	0	0	0	0	0	0	0	0	0	0	0	0	0	0	0	0	0	0	0	0	0	0
Bacteria	Firmicutes	Bacilli	Bacillales	Bacillaceae	Bacillus	Bacillus_filamentosus	2|1239|91061|1385|186817|1386|1402861	0	0	0	0	0	0	0	0	0	0	0	0	0	0	0	0	0	0	0	0	0	0	0	0	0	0	0	0	0	0	0	0	0	0	0.00025	0	0	0	0.0009	0	0	0
Bacteria	Firmicutes	Bacilli	Bacillales	Bacillaceae	Bacillus	Bacillus_haynesii	2|1239|91061|1385|186817|1386|1925021	0	0	0	0	0	0	0	0	0	0	0	0	0	0	0	0	0	0	0	0	0	0	0	0	0	0	0	0	0	0	0	0	0	0	0	0	0	0	0	0	0	0
Bacteria	Firmicutes	Bacilli	Bacillales	Bacillaceae	Bacillus	Bacillus_kochii	2|1239|91061|1385|186817|1386|859143	0	0	0	0	0	0	0	0	0	0	0	0	0	0	0	0	0	0	0	0	0	0	0	0	0	0	0	0	0	0	0	0	0	0	0	0	0	0	0	0	0	0
Bacteria	Firmicutes	Bacilli	Bacillales	Bacillaceae	Bacillus	Bacillus_megaterium	2|1239|91061|1385|186817|1386|1404	0	0	0	0	0	0	0	0	0	0	0	0	0	0	0	0	0	0	0	0	0	0	0	0	0	0	0	0	0	0	0	0	0	0	0	0	0	0	0	0	0	0
Bacteria	Firmicutes	Bacilli	Bacillales	Bacillaceae	Bacillus	Bacillus_murimartini	2|1239|91061|1385|186817|1386|171685	0	0	0	0	0	0	0	0	0	0	0	0	0	0	0	0	0	0	0	0	0	0	0	0	0	0	0	0	0	0	0	0	0	0	0	0	0	0	0	0	0	0
Bacteria	Firmicutes	Bacilli	Bacillales	Bacillaceae	Bacillus	Bacillus_oceanisediminis	2|1239|91061|1385|186817|1386|665099	0	0	0	0	0	0	0	0	0	0	0	0	0	0	0	0	0	0	0	0	0	0	0	0	0	0	0	0	0	0	0	0	0	0	0	0	0	0	0	0	0	0
Bacteria	Firmicutes	Bacilli	Bacillales	Bacillaceae	Bacillus	Bacillus_sporothermodurans	2|1239|91061|1385|186817|1386|46224	0	0	0	0	0	0	0	0	0	0	0	0	0	0	0	0	0	0	0	0	0	0	0	0	0	0	0	0	0	0	0	0	0	0	0	0	0	0	0	0	0	0
Bacteria	Firmicutes	Bacilli	Bacillales	Bacillaceae	Bacillus	Bacillus_thermoamylovorans	2|1239|91061|1385|186817|1386|35841	0	0	0	0	0	0	0	0	0	0	0	0	0	0	0	0	0	0	0	0	0	0	0	0	0	0	0	0	0	0	0	0	0	0	0	0	0	0	0	0	0	0
Bacteria	Firmicutes	Bacilli	Bacillales	Bacillaceae	Fictibacillus		2|1239|91061|1385|186817|1329200	0	0	0	0	0	0	0	0	0	0	0	0	0	0	0	0	0	0	0	0	0	0	0	0	0	0	0	0	0	0	0	0	0	0	0	0	0	0	0	0	0	0
Bacteria	Firmicutes	Bacilli	Bacillales	Bacillaceae	Fictibacillus	Fictibacillus_arsenicus	2|1239|91061|1385|186817|1329200|255247	0	0	0	0	0	0	0	0	0	0	0	0	0	0	0	0	0	0	0	0	0	0	0	0	0	0	0	0	0	0	0	0	0	0	0	0	0	0	0	0	0	0
Bacteria	Firmicutes	Bacilli	Bacillales	Bacillaceae	Lysinibacillus		2|1239|91061|1385|186817|400634	0	0	0	0	0	0.01169	0.00585	0.01416	0.01153	0.00468	0	0	0	0	0	0	0	0	0	0	0	0	0	0	0.51496	3.87233	1.24301	0.00417	0.00758	0.03341	0.05644	0.00871	0.08768	0.01295	0.21961	0.01011	0.00087	1.0355	0.19736	0	0	0
Bacteria	Firmicutes	Bacilli	Bacillales	Bacillaceae	Lysinibacillus	Lysinibacillus_sp_BF_4	2|1239|91061|1385|186817|400634|1473546	0	0	0	0	0	0.01169	0.00585	0.01416	0.01153	0.00468	0	0	0	0	0	0	0	0	0	0	0	0	0	0	0.51496	3.87233	1.24301	0.00417	0.00758	0.03341	0.05644	0.00871	0.08768	0.01295	0.21961	0.01011	0.00087	1.0355	0.19736	0	0	0
Bacteria	Firmicutes	Bacilli	Bacillales	Bacillaceae	Oceanobacillus		2|1239|91061|1385|186817|182709	0	0	0	0	0	0	0	0	0	0	0	0	0	0	0	0	0	0	0	0	0	0	0	0	0	0	0	0	0	0	0	0	0	0	0	0	0	0	0	0	0	0
Bacteria	Firmicutes	Bacilli	Bacillales	Bacillaceae	Oceanobacillus	Oceanobacillus_picturae	2|1239|91061|1385|186817|182709|171693	0	0	0	0	0	0	0	0	0	0	0	0	0	0	0	0	0	0	0	0	0	0	0	0	0	0	0	0	0	0	0	0	0	0	0	0	0	0	0	0	0	0
Bacteria	Firmicutes	Bacilli	Bacillales	Bacillaceae	Virgibacillus		2|1239|91061|1385|186817|84406	0	0	0	0	0	0	0	0	0	0	0	0	0	0	0	0	0	0	0	0	0	0	0	0	0	0	0	0	0	0	0	0	0	0	0	0	0	0	0	0	0	0
Bacteria	Firmicutes	Bacilli	Bacillales	Bacillaceae	Virgibacillus	Virgibacillus_indicus	2|1239|91061|1385|186817|84406|2024554	0	0	0	0	0	0	0	0	0	0	0	0	0	0	0	0	0	0	0	0	0	0	0	0	0	0	0	0	0	0	0	0	0	0	0	0	0	0	0	0	0	0
Bacteria	Firmicutes	Bacilli	Bacillales	Bacillales_unclassified				0	0	0.00262	0	0.00373	0.01019	0.00982	0.00114	0	0.0018	0	0	0	0.01189	0	0	0	0	0	0	0	0	0	0	0.00485	0.09205	0.04275	0	0.00065	0.52609	0.37013	0.11248	0.08169	0.06461	0.18723	0.66869	0.00672	0.57165	0.03011	0	0	0
Bacteria	Firmicutes	Bacilli	Bacillales	Bacillales_unclassified			2|1239|91061|1385|	0	0	0	0	0	0	0	0	0	0	0	0	0	0	0	0	0	0	0	0	0	0	0	0	0	0	0	0	0	0	0	0	0	0	0	0	0	0	0	0	0	0
Bacteria	Firmicutes	Bacilli	Bacillales	Bacillales_unclassified	Bacillales_unclassified			0	0	0	0	0	0	0	0	0	0	0	0	0	0	0	0	0	0	0	0	0	0	0	0	0	0	0	0	0	0	0	0	0	0	0	0	0	0	0	0	0	0
Bacteria	Firmicutes	Bacilli	Bacillales	Bacillales_unclassified	Bacillales_unclassified		2|1239|91061|1385||	0	0	0	0	0	0	0	0	0	0	0	0	0	0	0	0	0	0	0	0	0	0	0	0	0	0	0	0	0	0	0	0	0	0	0	0	0	0	0	0	0	0
Bacteria	Firmicutes	Bacilli	Bacillales	Bacillales_unclassified	Bacillales_unclassified	Flavobacterium_thermophilum	2|1239|91061|1385|||1414643	0	0	0	0	0	0	0	0	0	0	0	0	0	0	0	0	0	0	0	0	0	0	0	0	0	0	0	0	0	0	0	0	0	0	0	0	0	0	0	0	0	0
Bacteria	Firmicutes	Bacilli	Bacillales	Bacillales_unclassified	Exiguobacterium		2|1239|91061|1385||33986	0	0	0	0	0	0	0	0	0	0	0	0	0	0.01189	0	0	0	0	0	0	0	0	0	0	0	0	0	0	0	0	0	0	0	0	0	0	0	0	0	0	0	0
Bacteria	Firmicutes	Bacilli	Bacillales	Bacillales_unclassified	Exiguobacterium	Exiguobacterium_acetylicum	2|1239|91061|1385||33986|41170	0	0	0	0	0	0	0	0	0	0	0	0	0	0	0	0	0	0	0	0	0	0	0	0	0	0	0	0	0	0	0	0	0	0	0	0	0	0	0	0	0	0
Bacteria	Firmicutes	Bacilli	Bacillales	Bacillales_unclassified	Exiguobacterium	Exiguobacterium_antarcticum	2|1239|91061|1385||33986|132920	0	0	0	0	0	0	0	0	0	0	0	0	0	0	0	0	0	0	0	0	0	0	0	0	0	0	0	0	0	0	0	0	0	0	0	0	0	0	0	0	0	0
Bacteria	Firmicutes	Bacilli	Bacillales	Bacillales_unclassified	Exiguobacterium	Exiguobacterium_aurantiacum	2|1239|91061|1385||33986|33987	0	0	0	0	0	0	0	0	0	0	0	0	0	0	0	0	0	0	0	0	0	0	0	0	0	0	0	0	0	0	0	0	0	0	0	0	0	0	0	0	0	0
Bacteria	Firmicutes	Bacilli	Bacillales	Bacillales_unclassified	Exiguobacterium	Exiguobacterium_chiriqhucha	2|1239|91061|1385||33986|1385984	0	0	0	0	0	0	0	0	0	0	0	0	0	0	0	0	0	0	0	0	0	0	0	0	0	0	0	0	0	0	0	0	0	0	0	0	0	0	0	0	0	0
Bacteria	Firmicutes	Bacilli	Bacillales	Bacillales_unclassified	Exiguobacterium	Exiguobacterium_enclense	2|1239|91061|1385||33986|1017277	0	0	0	0	0	0	0	0	0	0	0	0	0	0	0	0	0	0	0	0	0	0	0	0	0	0	0	0	0	0	0	0	0	0	0	0	0	0	0	0	0	0
Bacteria	Firmicutes	Bacilli	Bacillales	Bacillales_unclassified	Exiguobacterium	Exiguobacterium_indicum	2|1239|91061|1385||33986|296995	0	0	0	0	0	0	0	0	0	0	0	0	0	0.01189	0	0	0	0	0	0	0	0	0	0	0	0	0	0	0	0	0	0	0	0	0	0	0	0	0	0	0	0
Bacteria	Firmicutes	Bacilli	Bacillales	Bacillales_unclassified	Exiguobacterium	Exiguobacterium_mexicanum	2|1239|91061|1385||33986|340146	0	0	0	0	0	0	0	0	0	0	0	0	0	0	0	0	0	0	0	0	0	0	0	0	0	0	0	0	0	0	0	0	0	0	0	0	0	0	0	0	0	0
Bacteria	Firmicutes	Bacilli	Bacillales	Bacillales_unclassified	Exiguobacterium	Exiguobacterium_sp_AB2	2|1239|91061|1385||33986|1484479	0	0	0	0	0	0	0	0	0	0	0	0	0	0	0	0	0	0	0	0	0	0	0	0	0	0	0	0	0	0	0	0	0	0	0	0	0	0	0	0	0	0
Bacteria	Firmicutes	Bacilli	Bacillales	Bacillales_unclassified	Exiguobacterium	Exiguobacterium_sp_AT1b	2|1239|91061|1385||33986|360911	0	0	0	0	0	0	0	0	0	0	0	0	0	0	0	0	0	0	0	0	0	0	0	0	0	0	0	0	0	0	0	0	0	0	0	0	0	0	0	0	0	0
Bacteria	Firmicutes	Bacilli	Bacillales	Bacillales_unclassified	Gemella		2|1239|91061|1385||1378	0	0	0.00262	0	0.00373	0.01019	0.00982	0.00114	0	0.0018	0	0	0	0	0	0	0	0	0	0	0	0	0	0	0.00485	0.09205	0.04275	0	0.00065	0.52609	0.37013	0.11248	0.08169	0.06461	0.18723	0.66869	0.00672	0.57165	0.03011	0	0	0
Bacteria	Firmicutes	Bacilli	Bacillales	Bacillales_unclassified	Gemella	Gemella_asaccharolytica	2|1239|91061|1385||1378|502393	0	0	0.00262	0	0.00373	0.01019	0.00982	0.00114	0	0.0018	0	0	0	0	0	0	0	0	0	0	0	0	0	0	0.00485	0.09205	0.04275	0	0.00065	0.52609	0.37013	0.11248	0.08169	0.06461	0.18723	0.66869	0.00672	0.57165	0.03011	0	0	0
Bacteria	Firmicutes	Bacilli	Bacillales	Bacillales_unclassified	Gemella	Gemella_sanguinis	2|1239|91061|1385||1378|84135	0	0	0	0	0	0	0	0	0	0	0	0	0	0	0	0	0	0	0	0	0	0	0	0	0	0	0	0	0	0	0	0	0	0	0	0	0	0	0	0	0	0
Bacteria	Firmicutes	Bacilli	Bacillales	Listeriaceae			2|1239|91061|1385|186820	0	0	0	0	0	0	0	0	0	0	0	0	0	0	0	0	0	0	0	2.61228	0	0	0	0	0	0	0	0	0	0	0	0	0	0	0	0	0	0	0	0	0	0
Bacteria	Firmicutes	Bacilli	Bacillales	Listeriaceae	Brochothrix		2|1239|91061|1385|186820|2755	0	0	0	0	0	0	0	0	0	0	0	0	0	0	0	0	0	0	0	2.61228	0	0	0	0	0	0	0	0	0	0	0	0	0	0	0	0	0	0	0	0	0	0
Bacteria	Firmicutes	Bacilli	Bacillales	Listeriaceae	Brochothrix	Brochothrix_thermosphacta	2|1239|91061|1385|186820|2755|2756	0	0	0	0	0	0	0	0	0	0	0	0	0	0	0	0	0	0	0	2.61228	0	0	0	0	0	0	0	0	0	0	0	0	0	0	0	0	0	0	0	0	0	0
Bacteria	Firmicutes	Bacilli	Bacillales	Paenibacillaceae			2|1239|91061|1385|186822	0	0	0	0	0	0	0	0	0	0	0	0	0	0	0	0	0	0	0	0	0	0	0	0	0	0	0	0	0	0	0	0	0	0	0	0	0	0	0	0	0	0
Bacteria	Firmicutes	Bacilli	Bacillales	Paenibacillaceae	Paenibacillus		2|1239|91061|1385|186822|44249	0	0	0	0	0	0	0	0	0	0	0	0	0	0	0	0	0	0	0	0	0	0	0	0	0	0	0	0	0	0	0	0	0	0	0	0	0	0	0	0	0	0
Bacteria	Firmicutes	Bacilli	Bacillales	Paenibacillaceae	Paenibacillus	Paenibacillus_lautus	2|1239|91061|1385|186822|44249|1401	0	0	0	0	0	0	0	0	0	0	0	0	0	0	0	0	0	0	0	0	0	0	0	0	0	0	0	0	0	0	0	0	0	0	0	0	0	0	0	0	0	0
Bacteria	Firmicutes	Bacilli	Bacillales	Paenibacillaceae	Paenibacillus	Paenibacillus_sp_7884_2	2|1239|91061|1385|186822|44249|2022552	0	0	0	0	0	0	0	0	0	0	0	0	0	0	0	0	0	0	0	0	0	0	0	0	0	0	0	0	0	0	0	0	0	0	0	0	0	0	0	0	0	0
Bacteria	Firmicutes	Bacilli	Bacillales	Planococcaceae			2|1239|91061|1385|186818	0	0	0	0	0	0.00732	0	0	0.01257	0	0	0	0	0.10074	2.11048	0.04989	0	0	0	0	0	0	0	0	0.00173	0.00155	0.00337	0.22728	0.00192	0	0.01736	0.0014	0	0.01205	0.00037	0.00065	0	0.02069	0.00023	0	0	0
Bacteria	Firmicutes	Bacilli	Bacillales	Planococcaceae	Bhargavaea		2|1239|91061|1385|186818|941338	0	0	0	0	0	0	0	0	0	0	0	0	0	0	0	0	0	0	0	0	0	0	0	0	0	0	0	0	0	0	0	0	0	0	0	0	0	0	0	0	0	0
Bacteria	Firmicutes	Bacilli	Bacillales	Planococcaceae	Bhargavaea	Bhargavaea_beijingensis	2|1239|91061|1385|186818|941338|426756	0	0	0	0	0	0	0	0	0	0	0	0	0	0	0	0	0	0	0	0	0	0	0	0	0	0	0	0	0	0	0	0	0	0	0	0	0	0	0	0	0	0
Bacteria	Firmicutes	Bacilli	Bacillales	Planococcaceae	Kurthia		2|1239|91061|1385|186818|1649	0	0	0	0	0	0.00732	0	0	0.01257	0	0	0	0	0	0	0	0	0	0	0	0	0	0	0	0.00173	0.00155	0.00337	0.22728	0.00192	0	0.01736	0.0014	0	0.01205	0.00037	0.00065	0	0.02069	0.00023	0	0	0
Bacteria	Firmicutes	Bacilli	Bacillales	Planococcaceae	Kurthia	Kurthia_sp_11kri321	2|1239|91061|1385|186818|1649|1750719	0	0	0	0	0	0.00732	0	0	0.00823	0	0	0	0	0	0	0	0	0	0	0	0	0	0	0	0	0	0	0	0	0	0	0	0	0.01205	0	0.00065	0	0.02069	0.00023	0	0	0
Bacteria	Firmicutes	Bacilli	Bacillales	Planococcaceae	Kurthia	Kurthia_zopfii	2|1239|91061|1385|186818|1649|1650	0	0	0	0	0	0	0	0	0.00434	0	0	0	0	0	0	0	0	0	0	0	0	0	0	0	0.00173	0.00155	0.00337	0.22728	0.00192	0	0.01736	0.0014	0	0	0.00037	0	0	0	0	0	0	0
Bacteria	Firmicutes	Bacilli	Bacillales	Planococcaceae	Planococcus		2|1239|91061|1385|186818|1372	0	0	0	0	0	0	0	0	0	0	0	0	0	0.10074	0.36057	0	0	0	0	0	0	0	0	0	0	0	0	0	0	0	0	0	0	0	0	0	0	0	0	0	0	0
Bacteria	Firmicutes	Bacilli	Bacillales	Planococcaceae	Planococcus	Planococcus_plakortidis	2|1239|91061|1385|186818|1372|1038856	0	0	0	0	0	0	0	0	0	0	0	0	0	0.10074	0.36057	0	0	0	0	0	0	0	0	0	0	0	0	0	0	0	0	0	0	0	0	0	0	0	0	0	0	0
Bacteria	Firmicutes	Bacilli	Bacillales	Planococcaceae	Planomicrobium		2|1239|91061|1385|186818|162291	0	0	0	0	0	0	0	0	0	0	0	0	0	0	1.74991	0.04989	0	0	0	0	0	0	0	0	0	0	0	0	0	0	0	0	0	0	0	0	0	0	0	0	0	0
Bacteria	Firmicutes	Bacilli	Bacillales	Planococcaceae	Planomicrobium	Planomicrobium_glaciei	2|1239|91061|1385|186818|162291|459472	0	0	0	0	0	0	0	0	0	0	0	0	0	0	0.7986	0.04989	0	0	0	0	0	0	0	0	0	0	0	0	0	0	0	0	0	0	0	0	0	0	0	0	0	0
Bacteria	Firmicutes	Bacilli	Bacillales	Planococcaceae	Planomicrobium	Planomicrobium_sp_MB_3u_38	2|1239|91061|1385|186818|162291|2058318	0	0	0	0	0	0	0	0	0	0	0	0	0	0	0.95131	0	0	0	0	0	0	0	0	0	0	0	0	0	0	0	0	0	0	0	0	0	0	0	0	0	0	0
Bacteria	Firmicutes	Bacilli	Bacillales	Planococcaceae	Tetzosporium		2|1239|91061|1385|186818|2079189	0	0	0	0	0	0	0	0	0	0	0	0	0	0	0	0	0	0	0	0	0	0	0	0	0	0	0	0	0	0	0	0	0	0	0	0	0	0	0	0	0	0
Bacteria	Firmicutes	Bacilli	Bacillales	Planococcaceae	Tetzosporium	Tetzosporium_hominis	2|1239|91061|1385|186818|2079189|2020506	0	0	0	0	0	0	0	0	0	0	0	0	0	0	0	0	0	0	0	0	0	0	0	0	0	0	0	0	0	0	0	0	0	0	0	0	0	0	0	0	0	0
Bacteria	Firmicutes	Bacilli	Bacillales	Staphylococcaceae			2|1239|91061|1385|90964	0.01613	0.01613	0.13274	0.0398	0.08512	0.82476	0.24334	0.33498	0.65221	0.28642	0	0	0	0	0	0.83106	0	0	0	0	0	0	0	0	0.10763	0	0	0	0	0.0464	0.01053	0.00639	0.35051	2.91761	8.90567	0.35136	0.09849	0.349	0.04442	0	0	0
Bacteria	Firmicutes	Bacilli	Bacillales	Staphylococcaceae	Jeotgalicoccus		2|1239|91061|1385|90964|227979	0	0	0.00625	0	0.00881	0.24306	0.0976	0.16126	0.21808	0.11627	0	0	0	0	0	0.62381	0	0	0	0	0	0	0	0	0.06805	0	0	0	0	0.01305	0.00314	0.00142	0.24124	0.4843	3.26958	0.14667	0.07682	0.27254	0.03935	0	0	0
Bacteria	Firmicutes	Bacilli	Bacillales	Staphylococcaceae	Jeotgalicoccus	Jeotgalicoccus_halophilus	2|1239|91061|1385|90964|227979|586411	0	0	0.00625	0	0.00881	0.22084	0.09624	0.15518	0.17693	0.11419	0	0	0	0	0	0.58709	0	0	0	0	0	0	0	0	0.05891	0	0	0	0	0.01201	0.00314	0.00142	0.23204	0.44393	3.04443	0.13243	0.07479	0.25566	0.03935	0	0	0
Bacteria	Firmicutes	Bacilli	Bacillales	Staphylococcaceae	Jeotgalicoccus	Jeotgalicoccus_halotolerans	2|1239|91061|1385|90964|227979|157227	0	0	0	0	0	0.0198	0.00136	0.00607	0.03947	0.00207	0	0	0	0	0	0.03672	0	0	0	0	0	0	0	0	0.00915	0	0	0	0	0.00104	0	0	0.0092	0.03725	0.21894	0.01424	0.00204	0.01688	0	0	0	0
Bacteria	Firmicutes	Bacilli	Bacillales	Staphylococcaceae	Jeotgalicoccus	Jeotgalicoccus_saudimassiliensis	2|1239|91061|1385|90964|227979|1461582	0	0	0	0	0	0	0	0	0	0	0	0	0	0	0	0	0	0	0	0	0	0	0	0	0	0	0	0	0	0	0	0	0	0	0.00026	0	0	0	0	0	0	0
Bacteria	Firmicutes	Bacilli	Bacillales	Staphylococcaceae	Jeotgalicoccus	Jeotgalicoccus_sp	2|1239|91061|1385|90964|227979|1871619	0	0	0	0	0	0.00242	0	0	0.00167	0	0	0	0	0	0	0	0	0	0	0	0	0	0	0	0	0	0	0	0	0	0	0	0	0.00312	0.00596	0	0	0	0	0	0	0
Bacteria	Firmicutes	Bacilli	Bacillales	Staphylococcaceae	Macrococcus		2|1239|91061|1385|90964|69965	0	0	0	0	0	0	0	0	0	0	0	0	0	0	0	0	0	0	0	0	0	0	0	0	0	0	0	0	0	0	0	0	0	0	0	0	0	0	0	0	0	0
Bacteria	Firmicutes	Bacilli	Bacillales	Staphylococcaceae	Macrococcus	Macrococcus_bohemicus	2|1239|91061|1385|90964|69965|1903056	0	0	0	0	0	0	0	0	0	0	0	0	0	0	0	0	0	0	0	0	0	0	0	0	0	0	0	0	0	0	0	0	0	0	0	0	0	0	0	0	0	0
Bacteria	Firmicutes	Bacilli	Bacillales	Staphylococcaceae	Macrococcus	Macrococcus_caseolyticus	2|1239|91061|1385|90964|69965|69966	0	0	0	0	0	0	0	0	0	0	0	0	0	0	0	0	0	0	0	0	0	0	0	0	0	0	0	0	0	0	0	0	0	0	0	0	0	0	0	0	0	0
Bacteria	Firmicutes	Bacilli	Bacillales	Staphylococcaceae	Macrococcus	Macrococcus_goetzii	2|1239|91061|1385|90964|69965|1891097	0	0	0	0	0	0	0	0	0	0	0	0	0	0	0	0	0	0	0	0	0	0	0	0	0	0	0	0	0	0	0	0	0	0	0	0	0	0	0	0	0	0
Bacteria	Firmicutes	Bacilli	Bacillales	Staphylococcaceae	Salinicoccus		2|1239|91061|1385|90964|45669	0	0	0	0	0	0.00039	0	0	0.00647	0	0	0	0	0	0	0	0	0	0	0	0	0	0	0	0	0	0	0	0	0	0	0	0	0	0	0	0	0	0	0	0	0
Bacteria	Firmicutes	Bacilli	Bacillales	Staphylococcaceae	Salinicoccus	Salinicoccus_halodurans	2|1239|91061|1385|90964|45669|407035	0	0	0	0	0	0.00039	0	0	0.00647	0	0	0	0	0	0	0	0	0	0	0	0	0	0	0	0	0	0	0	0	0	0	0	0	0	0	0	0	0	0	0	0	0
Bacteria	Firmicutes	Bacilli	Bacillales	Staphylococcaceae	Salinicoccus	Salinicoccus_roseus	2|1239|91061|1385|90964|45669|45670	0	0	0	0	0	0	0	0	0	0	0	0	0	0	0	0	0	0	0	0	0	0	0	0	0	0	0	0	0	0	0	0	0	0	0	0	0	0	0	0	0	0
Bacteria	Firmicutes	Bacilli	Bacillales	Staphylococcaceae	Salinicoccus	Salinicoccus_sediminis	2|1239|91061|1385|90964|45669|1432562	0	0	0	0	0	0	0	0	0	0	0	0	0	0	0	0	0	0	0	0	0	0	0	0	0	0	0	0	0	0	0	0	0	0	0	0	0	0	0	0	0	0
Bacteria	Firmicutes	Bacilli	Bacillales	Staphylococcaceae	Staphylococcus		2|1239|91061|1385|90964|1279	0.01613	0.01613	0.12649	0.0398	0.07631	0.58131	0.14574	0.17372	0.42766	0.17015	0	0	0	0	0	0.20725	0	0	0	0	0	0	0	0	0.03958	0	0	0	0	0.03336	0.00738	0.00497	0.10927	2.43331	5.63609	0.20469	0.02167	0.07647	0.00507	0	0	0
Bacteria	Firmicutes	Bacilli	Bacillales	Staphylococcaceae	Staphylococcus	Staphylococcus_agnetis	2|1239|91061|1385|90964|1279|985762	0	0	0	0	0	0.03523	0.01873	0.01969	0	0.00982	0	0	0	0	0	0	0	0	0	0	0	0	0	0	0	0	0	0	0	0.01442	0	0	0	0	0	0	0	0	0	0	0	0
Bacteria	Firmicutes	Bacilli	Bacillales	Staphylococcaceae	Staphylococcus	Staphylococcus_argenteus	2|1239|91061|1385|90964|1279|985002	0	0	0	0	0	0	0	0	0	0	0	0	0	0	0	0	0	0	0	0	0	0	0	0	0	0	0	0	0	0	0	0	0	0	0	0	0	0	0	0	0	0
Bacteria	Firmicutes	Bacilli	Bacillales	Staphylococcaceae	Staphylococcus	Staphylococcus_arlettae	2|1239|91061|1385|90964|1279|29378	0	0	0	0	0	0.01142	0	0	0.00089	0.00322	0	0	0	0	0	0	0	0	0	0	0	0	0	0	0	0	0	0	0	0	0	0	0	0.00299	0.05254	0	0	0	0	0	0	0
Bacteria	Firmicutes	Bacilli	Bacillales	Staphylococcaceae	Staphylococcus	Staphylococcus_aureus	2|1239|91061|1385|90964|1279|1280	0.01613	0.01613	0.119	0.0398	0.07631	0	0	0	0.023	0	0	0	0	0	0	0	0	0	0	0	0	0	0	0	0	0	0	0	0	0	0	0.00313	0	0	0	0	0	0	0	0	0	0
Bacteria	Firmicutes	Bacilli	Bacillales	Staphylococcaceae	Staphylococcus	Staphylococcus_chromogenes	2|1239|91061|1385|90964|1279|46126	0	0	0.00241	0	0	0	0	0.00084	0.00427	0	0	0	0	0	0	0	0	0	0	0	0	0	0	0	0	0	0	0	0	0	0	0	0	0	0	0	0	0	0	0	0	0
Bacteria	Firmicutes	Bacilli	Bacillales	Staphylococcaceae	Staphylococcus	Staphylococcus_cohnii	2|1239|91061|1385|90964|1279|29382	0	0	0.00508	0	0	0.11322	0.02745	0.05191	0.07721	0.04728	0	0	0	0	0	0	0	0	0	0	0	0	0	0	0.00348	0	0	0	0	0.00518	0.00613	0.00089	0	0.05483	0.28093	0.01247	0	0	0	0	0	0
Bacteria	Firmicutes	Bacilli	Bacillales	Staphylococcaceae	Staphylococcus	Staphylococcus_condimenti	2|1239|91061|1385|90964|1279|70255	0	0	0	0	0	0	0	0	0	0	0	0	0	0	0	0	0	0	0	0	0	0	0	0	0	0	0	0	0	0	0	0	0	0	0	0	0	0	0	0	0	0
Bacteria	Firmicutes	Bacilli	Bacillales	Staphylococcaceae	Staphylococcus	Staphylococcus_epidermidis	2|1239|91061|1385|90964|1279|1282	0	0	0	0	0	0	0	0	0	0	0	0	0	0	0	0	0	0	0	0	0	0	0	0	0	0	0	0	0	0	0	0	0	0	0	0	0	0	0	0	0	0
Bacteria	Firmicutes	Bacilli	Bacillales	Staphylococcaceae	Staphylococcus	Staphylococcus_equorum	2|1239|91061|1385|90964|1279|246432	0	0	0	0	0	0.19023	0.0327	0.03669	0.1264	0.04101	0	0	0	0	0	0	0	0	0	0	0	0	0	0	0	0	0	0	0	0	0	0	0.00835	0.15834	3.61672	0.02889	0.00274	0.00519	0	0	0	0
Bacteria	Firmicutes	Bacilli	Bacillales	Staphylococcaceae	Staphylococcus	Staphylococcus_gallinarum	2|1239|91061|1385|90964|1279|1293	0	0	0	0	0	0	0	0	0	0	0	0	0	0	0	0	0	0	0	0	0	0	0	0	0	0	0	0	0	0	0	0	0	0	0	0	0	0	0	0	0	0
Bacteria	Firmicutes	Bacilli	Bacillales	Staphylococcaceae	Staphylococcus	Staphylococcus_hominis	2|1239|91061|1385|90964|1279|1290	0	0	0	0	0	0	0	0	0	0	0	0	0	0	0	0	0	0	0	0	0	0	0	0	0	0	0	0	0	0	0	0	0	0	0	0	0	0	0	0	0	0
Bacteria	Firmicutes	Bacilli	Bacillales	Staphylococcaceae	Staphylococcus	Staphylococcus_lentus	2|1239|91061|1385|90964|1279|42858	0	0	0	0	0	0.0784	0.02176	0.03368	0.07879	0.02566	0	0	0	0	0	0.20725	0	0	0	0	0	0	0	0	0.0361	0	0	0	0	0.01018	0.00125	0.00095	0.10055	1.94584	1.64847	0.12816	0.01829	0.07127	0.00188	0	0	0
Bacteria	Firmicutes	Bacilli	Bacillales	Staphylococcaceae	Staphylococcus	Staphylococcus_nepalensis	2|1239|91061|1385|90964|1279|214473	0	0	0	0	0	0.13789	0.04454	0.02976	0.10618	0.03389	0	0	0	0	0	0	0	0	0	0	0	0	0	0	0	0	0	0	0	0.00358	0	0	0.00037	0.26265	0.02429	0.03517	0.00063	0	0.00319	0	0	0
Bacteria	Firmicutes	Bacilli	Bacillales	Staphylococcaceae	Staphylococcus	Staphylococcus_piscifermentans	2|1239|91061|1385|90964|1279|70258	0	0	0	0	0	0	0	0	0	0	0	0	0	0	0	0	0	0	0	0	0	0	0	0	0	0	0	0	0	0	0	0	0	0	0	0	0	0	0	0	0	0
Bacteria	Firmicutes	Bacilli	Bacillales	Staphylococcaceae	Staphylococcus	Staphylococcus_saprophyticus	2|1239|91061|1385|90964|1279|29385	0	0	0	0	0	0	0	0	0	0	0	0	0	0	0	0	0	0	0	0	0	0	0	0	0	0	0	0	0	0	0	0	0	0	0.01163	0	0	0	0	0	0	0
Bacteria	Firmicutes	Bacilli	Bacillales	Staphylococcaceae	Staphylococcus	Staphylococcus_sciuri	2|1239|91061|1385|90964|1279|1296	0	0	0	0	0	0.00112	0	0	0	0	0	0	0	0	0	0	0	0	0	0	0	0	0	0	0	0	0	0	0	0	0	0	0	0.00772	0	0	0	0	0	0	0	0
Bacteria	Firmicutes	Bacilli	Bacillales	Staphylococcaceae	Staphylococcus	Staphylococcus_simulans	2|1239|91061|1385|90964|1279|1286	0	0	0	0	0	0.01381	0.00055	0.00116	0.01092	0.00927	0	0	0	0	0	0	0	0	0	0	0	0	0	0	0	0	0	0	0	0	0	0	0	0	0.00028	0	0	0	0	0	0	0
Bacteria	Firmicutes	Bacilli	Bacillales	Staphylococcaceae	Staphylococcus	Staphylococcus_vitulinus	2|1239|91061|1385|90964|1279|71237	0	0	0	0	0	0	0	0	0	0	0	0	0	0	0	0	0	0	0	0	0	0	0	0	0	0	0	0	0	0	0	0	0	0	0	0	0	0	0	0	0	0
Bacteria	Firmicutes	Bacilli	Bacillales	Staphylococcaceae	Staphylococcus	Staphylococcus_xylosus	2|1239|91061|1385|90964|1279|1288	0	0	0	0	0	0	0	0	0	0	0	0	0	0	0	0	0	0	0	0	0	0	0	0	0	0	0	0	0	0	0	0	0	0.00094	0.00123	0	0	0	0	0	0	0
Bacteria	Firmicutes	Bacilli	Lactobacillales				2|1239|91061|186826	11.21637	11.21637	36.33129	11.63086	32.18688	50.3701	36.84411	50.30833	46.09796	32.79477	1.17226	0.01022	0	0	1.79425	10.88864	0	0	0	0.86325	0	7.72874	0	3.55096	76.18101	36.3892	8.86865	52.30167	86.46667	81.84374	79.46593	75.34906	68.92316	71.44702	40.25057	51.48059	54.41289	41.18435	55.08085	0	0	0
Bacteria	Firmicutes	Bacilli	Lactobacillales	Aerococcaceae			2|1239|91061|186826|186827	0.12934	0.12934	0.56842	0.14521	0.46734	5.00575	3.40211	4.43082	4.05307	2.86228	0	0	0	0	0.05111	6.35661	0	0	0	0	0	0	0	0	2.05635	0.3046	0.11846	0.12008	0.04632	0.97601	0.63756	0.16402	3.88902	7.82348	19.36434	5.78062	1.884	13.62334	3.92393	0	0	0
Bacteria	Firmicutes	Bacilli	Lactobacillales	Aerococcaceae	Aerococcaceae_unclassified			0	0	0.02363	0.00777	0.02522	0.75397	0.58229	0.80184	0.53001	0.49957	0	0	0	0	0	2.76531	0	0	0	0	0	0	0	0	0.16962	0.04087	0.0348	0	0.0001	0.10786	0.08237	0.02895	1.26218	1.58892	8.32928	3.16169	0.19085	4.83637	0.56103	0	0	0
Bacteria	Firmicutes	Bacilli	Lactobacillales	Aerococcaceae	Aerococcaceae_unclassified		2|1239|91061|186826|186827|	0	0	0	0	0	0	0	0	0	0	0	0	0	0	0	0	0	0	0	0	0	0	0	0	0	0	0	0	0	0	0	0	0	0	0	0	0	0	0	0	0	0
Bacteria	Firmicutes	Bacilli	Lactobacillales	Aerococcaceae	Aerococcaceae_unclassified	Aerococcaceae_bacterium	2|1239|91061|186826|186827||2053495	0	0	0.02363	0.00777	0.02522	0.75397	0.58229	0.80184	0.53001	0.49957	0	0	0	0	0	2.76531	0	0	0	0	0	0	0	0	0.16962	0.04087	0.0348	0	0.0001	0.10786	0.08237	0.02895	1.26218	1.58892	8.32928	3.16169	0.19085	4.83637	0.56103	0	0	0
Bacteria	Firmicutes	Bacilli	Lactobacillales	Aerococcaceae	Aerococcus		2|1239|91061|186826|186827|1375	0.12258	0.12258	0.50961	0.13415	0.4129	4.09843	2.69785	3.50592	3.48809	2.27175	0	0	0	0	0.05111	3.59131	0	0	0	0	0	0	0	0	1.7511	0.18234	0.04089	0.12008	0.04606	0.81402	0.4987	0.10271	2.49712	6.07399	10.89657	2.29555	1.6829	8.39544	3.34874	0	0	0
Bacteria	Firmicutes	Bacilli	Lactobacillales	Aerococcaceae	Aerococcus	Aerococcus_urinaeequi	2|1239|91061|186826|186827|1375|51665	0.07973	0.07973	0.22315	0.05835	0.15344	1.904	1.17125	1.63735	1.48333	1.18973	0	0	0	0	0.05111	1.6524	0	0	0	0	0	0	0	0	0.79213	0.0977	0.02143	0.05175	0.02908	0.40237	0.22139	0.0593	1.2306	2.70032	4.81064	1.09836	0.7842	3.60091	1.48742	0	0	0
Bacteria	Firmicutes	Bacilli	Lactobacillales	Aerococcaceae	Aerococcus	Aerococcus_viridans	2|1239|91061|186826|186827|1375|1377	0.04284	0.04284	0.28646	0.0758	0.25946	2.19442	1.52661	1.86857	2.00476	1.08202	0	0	0	0	0	1.93891	0	0	0	0	0	0	0	0	0.95896	0.08464	0.01946	0.06833	0.01698	0.41165	0.27731	0.04341	1.26652	3.37367	6.08593	1.1972	0.8987	4.79453	1.86133	0	0	0
Bacteria	Firmicutes	Bacilli	Lactobacillales	Aerococcaceae	Facklamia		2|1239|91061|186826|186827|66831	0	0	0	0	0	0	0	0.00029	0	0	0	0	0	0	0	0	0	0	0	0	0	0	0	0	0.00155	0.00023	0	0	0	0	0	0	0.00055	0.00053	0.00174	0.00483	0	0.00427	0	0	0	0
Bacteria	Firmicutes	Bacilli	Lactobacillales	Aerococcaceae	Facklamia	Facklamia_ignava	2|1239|91061|186826|186827|66831|137730	0	0	0	0	0	0	0	0.00029	0	0	0	0	0	0	0	0	0	0	0	0	0	0	0	0	0.00155	0.00023	0	0	0	0	0	0	0.00055	0.00053	0.00174	0.00483	0	0.00427	0	0	0	0
Bacteria	Firmicutes	Bacilli	Lactobacillales	Aerococcaceae	Globicatella		2|1239|91061|186826|186827|13075	0.00676	0.00676	0.03518	0.00328	0.02922	0.15335	0.12196	0.12276	0.03498	0.09096	0	0	0	0	0	0	0	0	0	0	0	0	0	0	0.13408	0.08116	0.04277	0	0.00016	0.05413	0.05649	0.03237	0.12917	0.16004	0.13675	0.31855	0.01026	0.38726	0.01416	0	0	0
Bacteria	Firmicutes	Bacilli	Lactobacillales	Aerococcaceae	Globicatella	Globicatella_sanguinis	2|1239|91061|186826|186827|13075|13076	0	0	0.00675	0	0.00505	0.01837	0.01094	0.01323	0.00459	0.01111	0	0	0	0	0	0	0	0	0	0	0	0	0	0	0.01221	0.00776	0.00266	0	0	0.00513	0.0116	0.00548	0.01675	0.01752	0.01921	0.03714	0.00048	0.04702	0.00253	0	0	0
Bacteria	Firmicutes	Bacilli	Lactobacillales	Aerococcaceae	Globicatella	Globicatella_sulfidifaciens	2|1239|91061|186826|186827|13075|136093	0.00676	0.00676	0.02842	0.00328	0.02418	0.13498	0.11103	0.10954	0.03039	0.07985	0	0	0	0	0	0	0	0	0	0	0	0	0	0	0.12187	0.0734	0.0401	0	0.00016	0.049	0.04489	0.02689	0.11242	0.14252	0.11754	0.28141	0.00978	0.34025	0.01163	0	0	0
Bacteria	Firmicutes	Bacilli	Lactobacillales	Carnobacteriaceae			2|1239|91061|186826|186828	0.03126	0.03126	0.03353	0.00621	0.03566	0.29981	0.18858	0.26452	0.19383	0.16797	0.09628	0	0	0	0	2.20455	0	0	0	0.86325	0	0	0	0	1.04768	2.25282	0.41448	0.01014	0	0.34446	0.53735	0.11709	0.8591	1.92144	1.25345	1.49928	0.09755	11.37906	1.79077	0	0	0
Bacteria	Firmicutes	Bacilli	Lactobacillales	Carnobacteriaceae	Alkalibacterium		2|1239|91061|186826|186828|99906	0	0	0	0	0	0	0	0	0	0	0	0	0	0	0	0	0	0	0	0	0	0	0	0	0	0	0	0	0	0	0	0	0	0	0	0	0	0	0	0	0	0
Bacteria	Firmicutes	Bacilli	Lactobacillales	Carnobacteriaceae	Alkalibacterium	Alkalibacterium_olivapovliticus	2|1239|91061|186826|186828|99906|99907	0	0	0	0	0	0	0	0	0	0	0	0	0	0	0	0	0	0	0	0	0	0	0	0	0	0	0	0	0	0	0	0	0	0	0	0	0	0	0	0	0	0
Bacteria	Firmicutes	Bacilli	Lactobacillales	Carnobacteriaceae	Alkalibacterium	Alkalibacterium_thalassium	2|1239|91061|186826|186828|99906|426701	0	0	0	0	0	0	0	0	0	0	0	0	0	0	0	0	0	0	0	0	0	0	0	0	0	0	0	0	0	0	0	0	0	0	0	0	0	0	0	0	0	0
Bacteria	Firmicutes	Bacilli	Lactobacillales	Carnobacteriaceae	Atopostipes		2|1239|91061|186826|186828|292480	0.03126	0.03126	0.03353	0.00621	0.03566	0.08973	0.04836	0.076	0.06216	0.04302	0	0	0	0	0	0.93761	0	0	0	0	0	0	0	0	0.83447	0.06252	0.07801	0	0	0.22914	0.42973	0.05755	0.0389	0.10701	0.1346	0.23424	0.00849	0.73611	0.01874	0	0	0
Bacteria	Firmicutes	Bacilli	Lactobacillales	Carnobacteriaceae	Atopostipes	Atopostipes_suicloacalis	2|1239|91061|186826|186828|292480|180295	0.03126	0.03126	0.03353	0.00621	0.03566	0.08973	0.04836	0.076	0.06216	0.04302	0	0	0	0	0	0.93761	0	0	0	0	0	0	0	0	0.83447	0.06252	0.07801	0	0	0.22914	0.42973	0.05755	0.0389	0.10701	0.1346	0.23424	0.00849	0.73611	0.01874	0	0	0
Bacteria	Firmicutes	Bacilli	Lactobacillales	Carnobacteriaceae	Carnobacterium		2|1239|91061|186826|186828|2747	0	0	0	0	0	0	0	0	0	0	0	0	0	0	0	0	0	0	0	0.86325	0	0	0	0	0	0	0	0	0	0	0	0	0	0	0	0	0	0	0	0	0	0
Bacteria	Firmicutes	Bacilli	Lactobacillales	Carnobacteriaceae	Carnobacterium	Carnobacterium_divergens	2|1239|91061|186826|186828|2747|2748	0	0	0	0	0	0	0	0	0	0	0	0	0	0	0	0	0	0	0	0.86325	0	0	0	0	0	0	0	0	0	0	0	0	0	0	0	0	0	0	0	0	0	0
Bacteria	Firmicutes	Bacilli	Lactobacillales	Carnobacteriaceae	Carnobacterium	Carnobacterium_inhibens	2|1239|91061|186826|186828|2747|147709	0	0	0	0	0	0	0	0	0	0	0	0	0	0	0	0	0	0	0	0	0	0	0	0	0	0	0	0	0	0	0	0	0	0	0	0	0	0	0	0	0	0
Bacteria	Firmicutes	Bacilli	Lactobacillales	Carnobacteriaceae	Carnobacterium	Carnobacterium_maltaromaticum	2|1239|91061|186826|186828|2747|2751	0	0	0	0	0	0	0	0	0	0	0	0	0	0	0	0	0	0	0	0	0	0	0	0	0	0	0	0	0	0	0	0	0	0	0	0	0	0	0	0	0	0
Bacteria	Firmicutes	Bacilli	Lactobacillales	Carnobacteriaceae	Carnobacterium	Carnobacterium_sp_AT7	2|1239|91061|186826|186828|2747|333990	0	0	0	0	0	0	0	0	0	0	0	0	0	0	0	0	0	0	0	0	0	0	0	0	0	0	0	0	0	0	0	0	0	0	0	0	0	0	0	0	0	0
Bacteria	Firmicutes	Bacilli	Lactobacillales	Carnobacteriaceae	Desemzia		2|1239|91061|186826|186828|82800	0	0	0	0	0	0	0	0	0	0	0	0	0	0	0	0.52176	0	0	0	0	0	0	0	0	0	0	0	0	0	0	0	0	0	0.28511	0	0	0	0	0	0	0	0
Bacteria	Firmicutes	Bacilli	Lactobacillales	Carnobacteriaceae	Desemzia	Desemzia_incerta	2|1239|91061|186826|186828|82800|82801	0	0	0	0	0	0	0	0	0	0	0	0	0	0	0	0.52176	0	0	0	0	0	0	0	0	0	0	0	0	0	0	0	0	0	0.28511	0	0	0	0	0	0	0	0
Bacteria	Firmicutes	Bacilli	Lactobacillales	Carnobacteriaceae	Granulicatella		2|1239|91061|186826|186828|117563	0	0	0	0	0	0	0	0	0	0	0	0	0	0	0	0	0	0	0	0	0	0	0	0	0	0	0	0	0	0	0	0	0	0	0	0	0	0	0	0	0	0
Bacteria	Firmicutes	Bacilli	Lactobacillales	Carnobacteriaceae	Granulicatella	Granulicatella_adiacens	2|1239|91061|186826|186828|117563|46124	0	0	0	0	0	0	0	0	0	0	0	0	0	0	0	0	0	0	0	0	0	0	0	0	0	0	0	0	0	0	0	0	0	0	0	0	0	0	0	0	0	0
Bacteria	Firmicutes	Bacilli	Lactobacillales	Carnobacteriaceae	Jeotgalibaca		2|1239|91061|186826|186828|1470540	0	0	0	0	0	0.20155	0.14022	0.17875	0.13167	0.12495	0	0	0	0	0	0.74519	0	0	0	0	0	0	0	0	0.15953	2.1903	0.33647	0.01014	0	0.11201	0.10638	0.05954	0.82021	1.51311	1.10168	1.2476	0.08219	10.64295	1.77203	0	0	0
Bacteria	Firmicutes	Bacilli	Lactobacillales	Carnobacteriaceae	Jeotgalibaca	Jeotgalibaca_dankookensis	2|1239|91061|186826|186828|1470540|708126	0	0	0	0	0	0	0	0	0	0	0	0	0	0	0	0	0	0	0	0	0	0	0	0	0	0	0	0	0	0	0	0	0	0	0	0	0	0	0	0	0	0
Bacteria	Firmicutes	Bacilli	Lactobacillales	Carnobacteriaceae	Jeotgalibaca	Jeotgalibaca_sp_PTS2502	2|1239|91061|186826|186828|1470540|1903686	0	0	0	0	0	0.20155	0.14022	0.17875	0.13167	0.12495	0	0	0	0	0	0.74519	0	0	0	0	0	0	0	0	0.15953	2.1903	0.33647	0.01014	0	0.11201	0.10638	0.05954	0.82021	1.51311	1.10168	1.2476	0.08219	10.64295	1.77203	0	0	0
Bacteria	Firmicutes	Bacilli	Lactobacillales	Carnobacteriaceae	Pisciglobus		2|1239|91061|186826|186828|1384499	0	0	0	0	0	0.00853	0	0.00977	0	0	0	0	0	0	0	0	0	0	0	0	0	0	0	0	0.05368	0	0	0	0	0.00331	0.00124	0	0	0.01621	0.01717	0.01744	0.00687	0	0	0	0	0
Bacteria	Firmicutes	Bacilli	Lactobacillales	Carnobacteriaceae	Pisciglobus	Pisciglobus_halotolerans	2|1239|91061|186826|186828|1384499|745365	0	0	0	0	0	0.00853	0	0.00977	0	0	0	0	0	0	0	0	0	0	0	0	0	0	0	0	0.05368	0	0	0	0	0.00331	0.00124	0	0	0.01621	0.01717	0.01744	0.00687	0	0	0	0	0
Bacteria	Firmicutes	Bacilli	Lactobacillales	Carnobacteriaceae	Trichococcus		2|1239|91061|186826|186828|82802	0	0	0	0	0	0	0	0	0	0	0.09628	0	0	0	0	0	0	0	0	0	0	0	0	0	0	0	0	0	0	0	0	0	0	0	0	0	0	0	0	0	0	0
Bacteria	Firmicutes	Bacilli	Lactobacillales	Carnobacteriaceae	Trichococcus	Trichococcus_collinsii	2|1239|91061|186826|186828|82802|157076	0	0	0	0	0	0	0	0	0	0	0	0	0	0	0	0	0	0	0	0	0	0	0	0	0	0	0	0	0	0	0	0	0	0	0	0	0	0	0	0	0	0
Bacteria	Firmicutes	Bacilli	Lactobacillales	Carnobacteriaceae	Trichococcus	Trichococcus_flocculiformis	2|1239|91061|186826|186828|82802|82803	0	0	0	0	0	0	0	0	0	0	0.09628	0	0	0	0	0	0	0	0	0	0	0	0	0	0	0	0	0	0	0	0	0	0	0	0	0	0	0	0	0	0	0
Bacteria	Firmicutes	Bacilli	Lactobacillales	Carnobacteriaceae	Trichococcus	Trichococcus_pasteurii	2|1239|91061|186826|186828|82802|43064	0	0	0	0	0	0	0	0	0	0	0	0	0	0	0	0	0	0	0	0	0	0	0	0	0	0	0	0	0	0	0	0	0	0	0	0	0	0	0	0	0	0
Bacteria	Firmicutes	Bacilli	Lactobacillales	Enterococcaceae			2|1239|91061|186826|81852	0.2719	0.2719	0.972	0.30376	1.68473	2.24826	1.91917	2.08433	1.64848	1.6319	0	0	0	0	1.5345	0.01297	0	0	0	0	0	0	0	0	0.99232	0.74857	0.34099	0.32402	3.48071	0.84626	0.54123	1.22269	0.513	0.52276	0.70355	2.3659	0.51393	2.28308	2.4188	0	0	0
Bacteria	Firmicutes	Bacilli	Lactobacillales	Enterococcaceae	Bavariicoccus		2|1239|91061|186826|81852|697279	0	0	0	0	0	0	0	0	0	0	0	0	0	0	0	0	0	0	0	0	0	0	0	0	0	0.03612	0.00291	0	0	0.00683	0	0	0	0	0.00343	0.00432	0	0.03045	0	0	0	0
Bacteria	Firmicutes	Bacilli	Lactobacillales	Enterococcaceae	Bavariicoccus	Bavariicoccus_seileri	2|1239|91061|186826|81852|697279|549685	0	0	0	0	0	0	0	0	0	0	0	0	0	0	0	0	0	0	0	0	0	0	0	0	0	0.03612	0.00291	0	0	0.00683	0	0	0	0	0.00343	0.00432	0	0.03045	0	0	0	0
Bacteria	Firmicutes	Bacilli	Lactobacillales	Enterococcaceae	Enterococcus		2|1239|91061|186826|81852|1350	0.2719	0.2719	0.972	0.30376	1.68473	2.24826	1.91917	2.08433	1.64848	1.6319	0	0	0	0	1.5345	0.01297	0	0	0	0	0	0	0	0	0.99232	0.71244	0.33808	0.32402	3.48071	0.83943	0.54123	1.22269	0.513	0.52276	0.70011	2.36158	0.51393	2.25263	2.4188	0	0	0
Bacteria	Firmicutes	Bacilli	Lactobacillales	Enterococcaceae	Enterococcus	Enterococcus_aquimarinus	2|1239|91061|186826|81852|1350|328396	0	0	0	0	0	0	0	0	0	0	0	0	0	0	0	0	0	0	0	0	0	0	0	0	0	0.00447	0	0	0	0	0	0	0.00307	0.07808	0.01032	0.12125	0	0.04268	0	0	0	0
Bacteria	Firmicutes	Bacilli	Lactobacillales	Enterococcaceae	Enterococcus	Enterococcus_asini	2|1239|91061|186826|81852|1350|57732	0	0	0	0	0	0	0	0	0	0	0	0	0	0	0	0	0	0	0	0	0	0	0	0	0	0.0042	0	0.00566	0	0.00303	0.01103	0.00179	0.01045	0.00119	0	0	0	0.00479	0	0	0	0
Bacteria	Firmicutes	Bacilli	Lactobacillales	Enterococcaceae	Enterococcus	Enterococcus_avium	2|1239|91061|186826|81852|1350|33945	0	0	0	0	0	0	0	0	0	0	0	0	0	0	0	0	0	0	0	0	0	0	0	0	0.00423	0.01036	0	0	0	0	0.00233	0.00141	0	0	0	0	0	0	0	0	0	0
Bacteria	Firmicutes	Bacilli	Lactobacillales	Enterococcaceae	Enterococcus	Enterococcus_casseliflavus	2|1239|91061|186826|81852|1350|37734	0	0	0	0	0	0	0	0	0	0	0	0	0	0	0	0	0	0	0	0	0	0	0	0	0	0	0	0	0	0	0	0	0	0	0	0	0	0	0	0	0	0
Bacteria	Firmicutes	Bacilli	Lactobacillales	Enterococcaceae	Enterococcus	Enterococcus_cecorum	2|1239|91061|186826|81852|1350|44008	0.26958	0.26958	0.84661	0.30376	1.66844	1.74137	1.54772	1.50586	1.18444	1.3144	0	0	0	0	0	0.00584	0	0	0	0	0	0	0	0	0.53531	0.48462	0.20778	0.24656	3.40663	0.57553	0.399	0.9164	0.18001	0.05361	0.10443	0.40807	0.28501	0.70862	0.91512	0	0	0
Bacteria	Firmicutes	Bacilli	Lactobacillales	Enterococcaceae	Enterococcus	Enterococcus_dispar	2|1239|91061|186826|81852|1350|44009	0	0	0	0	0	0	0	0	0	0	0	0	0	0	0	0	0	0	0	0	0	0	0	0	0	0	0	0	0	0	0	0	0	0	0	0	0	0	0	0	0	0
Bacteria	Firmicutes	Bacilli	Lactobacillales	Enterococcaceae	Enterococcus	Enterococcus_durans	2|1239|91061|186826|81852|1350|53345	0	0	0	0	0	0.06523	0.05234	0.06785	0.08535	0.03704	0	0	0	0	0	0	0	0	0	0	0	0	0	0	0	0	0	0	0	0	0.00744	0	0.19503	0.03816	0.07112	0.20343	0.14798	1.04179	0.52712	0	0	0
Bacteria	Firmicutes	Bacilli	Lactobacillales	Enterococcaceae	Enterococcus	Enterococcus_faecalis	2|1239|91061|186826|81852|1350|1351	0.00232	0.00232	0.12539	0	0.01629	0.02686	0.02124	0.02172	0.03727	0.03904	0	0	0	0	0	0	0	0	0	0	0	0	0	0	0.45278	0.1985	0.12936	0.0718	0.07409	0.04481	0.0914	0.28688	0.06527	0.13196	0.04909	0.10365	0.0521	0.28452	0.69546	0	0	0
Bacteria	Firmicutes	Bacilli	Lactobacillales	Enterococcaceae	Enterococcus	Enterococcus_faecium	2|1239|91061|186826|81852|1350|1352	0	0	0	0	0	0.05685	0.02646	0.07969	0.05796	0.03082	0	0	0	0	1.5345	0	0	0	0	0	0	0	0	0	0	0.00234	0	0	0	0.09771	0.01466	0.0054	0.0173	0.06744	0.14282	0.91265	0.00542	0.02864	0.08904	0	0	0
Bacteria	Firmicutes	Bacilli	Lactobacillales	Enterococcaceae	Enterococcus	Enterococcus_gallinarum	2|1239|91061|186826|81852|1350|1353	0	0	0	0	0	0.03081	0.02809	0.03558	0.03632	0.01211	0	0	0	0	0	0	0	0	0	0	0	0	0	0	0	0.00795	0	0	0	0.00347	0.00042	0.00216	0.00153	0	0.01071	0.10728	0	0.00129	0	0	0	0
Bacteria	Firmicutes	Bacilli	Lactobacillales	Enterococcaceae	Enterococcus	Enterococcus_hirae	2|1239|91061|186826|81852|1350|1354	0	0	0	0	0	0.32714	0.24332	0.37362	0.24714	0.19849	0	0	0	0	0	0.00713	0	0	0	0	0	0	0	0	0	0	0.00094	0	0	0.11487	0.01494	0.00864	0.04034	0.15231	0.31163	0.50526	0.02342	0.1403	0.19205	0	0	0
Bacteria	Firmicutes	Bacilli	Lactobacillales	Enterococcaceae	Enterococcus	Enterococcus_italicus	2|1239|91061|186826|81852|1350|246144	0	0	0	0	0	0	0	0	0	0	0	0	0	0	0	0	0	0	0	0	0	0	0	0	0	0	0	0	0	0	0	0	0	0	0	0	0	0	0	0	0	0
Bacteria	Firmicutes	Bacilli	Lactobacillales	Enterococcaceae	Enterococcus	Enterococcus_pseudoavium	2|1239|91061|186826|81852|1350|44007	0	0	0	0	0	0	0	0	0	0	0	0	0	0	0	0	0	0	0	0	0	0	0	0	0	0	0	0	0	0	0	0	0	0	0	0	0	0	0	0	0	0
Bacteria	Firmicutes	Bacilli	Lactobacillales	Enterococcaceae	Enterococcus	Enterococcus_raffinosus	2|1239|91061|186826|81852|1350|71452	0	0	0	0	0	0	0	0	0	0	0	0	0	0	0	0	0	0	0	0	0	0	0	0	0	0	0	0	0	0	0	0	0	0	0	0	0	0	0	0	0	0
Bacteria	Firmicutes	Bacilli	Lactobacillales	Enterococcaceae	Enterococcus	Enterococcus_saccharolyticus	2|1239|91061|186826|81852|1350|41997	0	0	0	0	0	0	0	0	0	0	0	0	0	0	0	0	0	0	0	0	0	0	0	0	0	0	0	0	0	0	0	0	0	0	0	0	0	0	0	0	0	0
Bacteria	Firmicutes	Bacilli	Lactobacillales	Enterococcaceae	Enterococcus	Enterococcus_sp_RIT_PI_f	2|1239|91061|186826|81852|1350|1690244	0	0	0	0	0	0	0	0	0	0	0	0	0	0	0	0	0	0	0	0	0	0	0	0	0	0	0	0	0	0	0	0	0	0	0	0	0	0	0	0	0	0
Bacteria	Firmicutes	Bacilli	Lactobacillales	Enterococcaceae	Enterococcus	Enterococcus_thailandicus	2|1239|91061|186826|81852|1350|417368	0	0	0	0	0	0	0	0	0	0	0	0	0	0	0	0	0	0	0	0	0	0	0	0	0	0	0	0	0	0	0	0	0	0	0	0	0	0	0	0	0	0
Bacteria	Firmicutes	Bacilli	Lactobacillales	Enterococcaceae	Melissococcus		2|1239|91061|186826|81852|33969	0	0	0	0	0	0	0	0	0	0	0	0	0	0	0	0	0	0	0	0	0	0	0	0	0	0	0	0	0	0	0	0	0	0	0	0	0	0	0	0	0	0
Bacteria	Firmicutes	Bacilli	Lactobacillales	Enterococcaceae	Melissococcus	Melissococcus_sp_OM08_11BH	2|1239|91061|186826|81852|33969|2293110	0	0	0	0	0	0	0	0	0	0	0	0	0	0	0	0	0	0	0	0	0	0	0	0	0	0	0	0	0	0	0	0	0	0	0	0	0	0	0	0	0	0
Bacteria	Firmicutes	Bacilli	Lactobacillales	Enterococcaceae	Tetragenococcus		2|1239|91061|186826|81852|51668	0	0	0	0	0	0	0	0	0	0	0	0	0	0	0	0	0	0	0	0	0	0	0	0	0	0	0	0	0	0	0	0	0	0	0	0	0	0	0	0	0	0
Bacteria	Firmicutes	Bacilli	Lactobacillales	Enterococcaceae	Tetragenococcus	Tetragenococcus_halophilus	2|1239|91061|186826|81852|51668|51669	0	0	0	0	0	0	0	0	0	0	0	0	0	0	0	0	0	0	0	0	0	0	0	0	0	0	0	0	0	0	0	0	0	0	0	0	0	0	0	0	0	0
Bacteria	Firmicutes	Bacilli	Lactobacillales	Enterococcaceae	Vagococcus		2|1239|91061|186826|81852|2737	0	0	0	0	0	0	0	0	0	0	0	0	0	0	0	0	0	0	0	0	0	0	0	0	0	0	0	0	0	0	0	0	0	0	0	0	0	0	0	0	0	0
Bacteria	Firmicutes	Bacilli	Lactobacillales	Enterococcaceae	Vagococcus	Vagococcus_lutrae	2|1239|91061|186826|81852|2737|81947	0	0	0	0	0	0	0	0	0	0	0	0	0	0	0	0	0	0	0	0	0	0	0	0	0	0	0	0	0	0	0	0	0	0	0	0	0	0	0	0	0	0
Bacteria	Firmicutes	Bacilli	Lactobacillales	Enterococcaceae	Vagococcus	Vagococcus_teuberi	2|1239|91061|186826|81852|2737|519472	0	0	0	0	0	0	0	0	0	0	0	0	0	0	0	0	0	0	0	0	0	0	0	0	0	0	0	0	0	0	0	0	0	0	0	0	0	0	0	0	0	0
Bacteria	Firmicutes	Bacilli	Lactobacillales	Lactobacillaceae			2|1239|91061|186826|33958	10.76474	10.76474	34.60407	11.16496	29.94328	42.62126	31.1758	43.29912	39.9906	27.99366	1.06636	0	0	0	0	2.3145	0	0	0	0	0	2.10947	0	3.55096	71.59294	33.04959	7.99364	45.78208	82.18451	77.69324	77.48955	73.66658	62.95011	60.7941	18.81468	41.62567	51.56115	13.86467	46.9418	0	0	0
Bacteria	Firmicutes	Bacilli	Lactobacillales	Lactobacillaceae	Lactobacillus		2|1239|91061|186826|33958|1578	10.76474	10.76474	34.60407	11.16496	29.94328	42.62126	31.1758	43.29912	39.9906	27.99366	1.06636	0	0	0	0	2.3145	0	0	0	0	0	2.10947	0	3.55096	71.59294	33.04959	7.99364	45.78208	82.18451	77.69324	77.48955	73.66658	62.95011	60.7941	18.81468	41.62567	51.56115	13.86467	46.9418	0	0	0
Bacteria	Firmicutes	Bacilli	Lactobacillales	Lactobacillaceae	Lactobacillus	Lactobacillus_acidipiscis	2|1239|91061|186826|33958|1578|89059	0	0	0	0	0	0	0	0	0	0	0	0	0	0	0	0.02614	0	0	0	0	0	0	0	0	0	0	0	0	0	0	0	0	0	0	0	0	0	0	0	0	0	0
Bacteria	Firmicutes	Bacilli	Lactobacillales	Lactobacillaceae	Lactobacillus	Lactobacillus_agilis	2|1239|91061|186826|33958|1578|1601	0	0	0	0	0	0.00204	0.00423	0.00386	0.04283	0	0	0	0	0	0	0	0	0	0	0	0	0	0	0	0	0	0	0	0	0	0	0	0	0	0	0	0	0	0	0	0	0
Bacteria	Firmicutes	Bacilli	Lactobacillales	Lactobacillaceae	Lactobacillus	Lactobacillus_amylovorus	2|1239|91061|186826|33958|1578|1604	0	0	0	0	0	0	0	0	0	0	0	0	0	0	0	0	0	0	0	0	0	0	0	0	0	0	0	0	0	0	0	0	0	0	0	0	0	0	0	0	0	0
Bacteria	Firmicutes	Bacilli	Lactobacillales	Lactobacillaceae	Lactobacillus	Lactobacillus_antri	2|1239|91061|186826|33958|1578|227943	0	0	0	0	0	0	0	0	0	0	0	0	0	0	0	0	0	0	0	0	0	0	0	0	0.00012	0	0	0	0	0	0	0	0	0	0	0	0	0	0	0	0	0
Bacteria	Firmicutes	Bacilli	Lactobacillales	Lactobacillaceae	Lactobacillus	Lactobacillus_aviarius	2|1239|91061|186826|33958|1578|1606	1.75281	1.75281	4.98841	2.04134	5.12395	3.65949	2.57607	3.59836	3.80156	2.32036	0.21427	0	0	0	0	0.03615	0	0	0	0	0	1.94402	0	1.92795	1.42774	8.30302	2.36665	3.11878	32.98952	1.61246	7.23575	14.94545	26.21622	4.42916	1.09188	4.39875	14.38551	2.15332	12.35955	0	0	0
Bacteria	Firmicutes	Bacilli	Lactobacillales	Lactobacillaceae	Lactobacillus	Lactobacillus_brevis	2|1239|91061|186826|33958|1578|1580	0	0	0	0	0	0	0	0	0	0	0	0	0	0	0	0	0	0	0	0	0	0	0	0	0	0	0	0.3389	0.24033	0.11992	0.1434	0.13512	0.00368	0	0	0	0	0	0	0	0	0
Bacteria	Firmicutes	Bacilli	Lactobacillales	Lactobacillaceae	Lactobacillus	Lactobacillus_buchneri	2|1239|91061|186826|33958|1578|1581	0	0	0	0	0	0	0	0	0	0	0	0	0	0	0	0	0	0	0	0	0	0	0	0	0	0	0	0	0	0	0	0	0	0	0	0	0	0	0	0	0	0
Bacteria	Firmicutes	Bacilli	Lactobacillales	Lactobacillaceae	Lactobacillus	Lactobacillus_coleohominis	2|1239|91061|186826|33958|1578|181675	0	0	0	0	0	0	0	0	0	0	0	0	0	0	0	0	0	0	0	0	0	0	0	0	0	0	0	0	0	0	0	0	0	0	0	0	0	0	0	0	0	0
Bacteria	Firmicutes	Bacilli	Lactobacillales	Lactobacillaceae	Lactobacillus	Lactobacillus_coryniformis	2|1239|91061|186826|33958|1578|1610	0	0	0	0	0	0	0	0	0	0	0	0	0	0	0	0	0	0	0	0	0	0	0	0	0	0	0	0	0	0	0	0	0	0	0	0	0	0	0	0	0	0
Bacteria	Firmicutes	Bacilli	Lactobacillales	Lactobacillaceae	Lactobacillus	Lactobacillus_crispatus	2|1239|91061|186826|33958|1578|47770	3.34455	3.34455	11.36835	3.44652	8.68191	14.68508	10.89029	14.89857	10.66316	9.8108	0.24304	0	0	0	0	0.71122	0	0	0	0	0	0.16545	0	1.62301	18.30209	7.25664	2.14344	9.29147	7.17684	25.69764	15.29795	11.44237	8.79084	13.26351	3.28224	7.79487	14.81831	3.49388	12.83339	0	0	0
Bacteria	Firmicutes	Bacilli	Lactobacillales	Lactobacillaceae	Lactobacillus	Lactobacillus_curvatus	2|1239|91061|186826|33958|1578|28038	0	0	0	0	0	0	0	0	0	0	0	0	0	0	0	0	0	0	0	0	0	0	0	0	0	0	0	0.20755	0.23926	0.04153	0.05693	0.01593	0.00112	0	0	0	0	0	0	0	0	0
Bacteria	Firmicutes	Bacilli	Lactobacillales	Lactobacillaceae	Lactobacillus	Lactobacillus_delbrueckii	2|1239|91061|186826|33958|1578|1584	0	0	0	0	0	0	0	0	0	0	0	0	0	0	0	0	0	0	0	0	0	0	0	0	0	0	0	0	0	0	0	0	0	0	0	0	0	0	0	0	0	0
Bacteria	Firmicutes	Bacilli	Lactobacillales	Lactobacillaceae	Lactobacillus	Lactobacillus_dextrinicus	2|1239|91061|186826|33958|1578|51664	0	0	0	0	0	0	0	0	0	0	0	0	0	0	0	0	0	0	0	0	0	0	0	0	0	0.01166	0	0.84511	0.51203	0.0762	0.1337	0.02418	0.03301	0	0	0.01718	0	0.0071	0	0	0	0
Bacteria	Firmicutes	Bacilli	Lactobacillales	Lactobacillaceae	Lactobacillus	Lactobacillus_farciminis	2|1239|91061|186826|33958|1578|1612	0	0	0	0	0	0	0	0	0	0	0	0	0	0	0	0	0	0	0	0	0	0	0	0	0	0.00322	0	0.10987	0.11736	0.14211	0.07148	0.01148	0.05235	0	0	0.00411	0	0	0	0	0	0
Bacteria	Firmicutes	Bacilli	Lactobacillales	Lactobacillaceae	Lactobacillus	Lactobacillus_fermentum	2|1239|91061|186826|33958|1578|1613	0	0	0	0	0	0	0	0	0	0	0	0	0	0	0	0	0	0	0	0	0	0	0	0	0	0	0	0	0	0	0	0	0	0	0	0	0	0	0	0	0	0
Bacteria	Firmicutes	Bacilli	Lactobacillales	Lactobacillaceae	Lactobacillus	Lactobacillus_fuchuensis	2|1239|91061|186826|33958|1578|164393	0	0	0	0	0	0	0	0	0	0	0	0	0	0	0	0	0	0	0	0	0	0	0	0	0	0	0	0	0	0	0	0	0	0	0	0	0	0	0	0	0	0
Bacteria	Firmicutes	Bacilli	Lactobacillales	Lactobacillaceae	Lactobacillus	Lactobacillus_futsaii	2|1239|91061|186826|33958|1578|938155	0	0	0	0	0	0	0	0	0	0	0	0	0	0	0	0	0	0	0	0	0	0	0	0	0	0	0	0.01427	0.01363	0.01256	0.01598	0.00077	0.00044	0	0	0	0	0	0	0	0	0
Bacteria	Firmicutes	Bacilli	Lactobacillales	Lactobacillaceae	Lactobacillus	Lactobacillus_gallinarum	2|1239|91061|186826|33958|1578|52242	1.54731	1.54731	5.31244	1.51453	5.21515	0.03026	0.02138	0.01697	0.34786	0.02006	0.17014	0	0	0	0	0	0	0	0	0	0	0	0	0	40.89969	6.75239	0.98379	5.4825	26.66098	12.61088	20.81482	21.97278	0.28767	0.06506	0.20703	0.38376	0	0	0.00953	0	0	0
Bacteria	Firmicutes	Bacilli	Lactobacillales	Lactobacillaceae	Lactobacillus	Lactobacillus_ingluviei	2|1239|91061|186826|33958|1578|148604	0	0	0	0	0	0	0	0	0	0	0	0	0	0	0	0	0	0	0	0	0	0	0	0	0	0	0	0	0	0	0	0	0	0	0	0	0	0	0	0	0	0
Bacteria	Firmicutes	Bacilli	Lactobacillales	Lactobacillaceae	Lactobacillus	Lactobacillus_intestinalis	2|1239|91061|186826|33958|1578|151781	0	0	0	0	0	0	0	0	0	0	0	0	0	0	0	0	0	0	0	0	0	0	0	0	0	0	0	0	0	0	0	0	0	0.46857	0	0	0	0	0	0	0	0
Bacteria	Firmicutes	Bacilli	Lactobacillales	Lactobacillaceae	Lactobacillus	Lactobacillus_johnsonii	2|1239|91061|186826|33958|1578|33959	1.21501	1.21501	3.60226	1.19692	2.89831	8.44776	6.17274	7.78705	11.53251	5.47825	0.04429	0	0	0	0	0.67374	0	0	0	0	0	0	0	0	5.94195	2.24289	1.02415	13.6186	5.89938	11.95005	14.26274	10.38043	11.9839	16.78931	5.99886	13.48466	6.19456	4.74424	10.3367	0	0	0
Bacteria	Firmicutes	Bacilli	Lactobacillales	Lactobacillaceae	Lactobacillus	Lactobacillus_manihotivorans	2|1239|91061|186826|33958|1578|88233	0	0	0	0	0	0	0	0	0	0	0	0	0	0	0	0	0	0	0	0	0	0	0	0	0	0	0	0.00661	0.00216	0	0	0	0.00046	0	0	0	0	0	0	0	0	0
Bacteria	Firmicutes	Bacilli	Lactobacillales	Lactobacillaceae	Lactobacillus	Lactobacillus_murinus	2|1239|91061|186826|33958|1578|1622	0	0	0	0	0	0	0	0	0	0	0	0	0	0	0	0	0	0	0	0	0	0	0	0	0	0	0	0	0	0	0	0	0	0.59372	0	0	0	0	0	0	0	0
Bacteria	Firmicutes	Bacilli	Lactobacillales	Lactobacillaceae	Lactobacillus	Lactobacillus_nantensis	2|1239|91061|186826|33958|1578|305793	0	0	0	0	0	0	0	0	0	0	0	0	0	0	0	0	0	0	0	0	0	0	0	0	0	0	0	0	0	0	0	0	0	0	0	0	0	0	0	0	0	0
Bacteria	Firmicutes	Bacilli	Lactobacillales	Lactobacillaceae	Lactobacillus	Lactobacillus_nodensis	2|1239|91061|186826|33958|1578|460870	0	0	0	0	0	0	0	0	0	0	0	0	0	0	0	0	0	0	0	0	0	0	0	0	0	0	0	0	0	0	0	0	0	0	0	0	0	0	0	0	0	0
Bacteria	Firmicutes	Bacilli	Lactobacillales	Lactobacillaceae	Lactobacillus	Lactobacillus_odoratitofui	2|1239|91061|186826|33958|1578|480930	0	0	0	0	0	0	0	0	0	0	0	0	0	0	0	0	0	0	0	0	0	0	0	0	0	0	0	0	0	0	0	0	0	0	0	0	0	0	0	0	0	0
Bacteria	Firmicutes	Bacilli	Lactobacillales	Lactobacillaceae	Lactobacillus	Lactobacillus_oris	2|1239|91061|186826|33958|1578|1632	0.02126	0.02126	0.10602	0.02681	0.10226	0	0	0	0.02497	0	0	0	0	0	0	0	0	0	0	0	0	0	0	0	0.20082	0.17621	0.00811	0.0106	0.07516	0.58334	0.20918	0.03374	0.05667	0	0.01388	0.03558	0	0	0	0	0	0
Bacteria	Firmicutes	Bacilli	Lactobacillales	Lactobacillaceae	Lactobacillus	Lactobacillus_oryzae	2|1239|91061|186826|33958|1578|1202668	0	0	0	0	0	0	0	0	0	0	0	0	0	0	0	0	0	0	0	0	0	0	0	0	0	0	0	0	0	0	0	0	0	0	0	0	0	0	0	0	0	0
Bacteria	Firmicutes	Bacilli	Lactobacillales	Lactobacillaceae	Lactobacillus	Lactobacillus_panis	2|1239|91061|186826|33958|1578|47493	0	0	0	0	0	0	0	0	0	0	0	0	0	0	0	0	0	0	0	0	0	0	0	0	0	0	0	0	0	0	0	0	0	0	0	0	0	0	0	0	0	0
Bacteria	Firmicutes	Bacilli	Lactobacillales	Lactobacillaceae	Lactobacillus	Lactobacillus_parabrevis	2|1239|91061|186826|33958|1578|357278	0	0	0	0	0	0	0	0	0	0	0	0	0	0	0	0	0	0	0	0	0	0	0	0	0	0	0	0	0	0	0	0	0	0	0	0	0	0	0	0	0	0
Bacteria	Firmicutes	Bacilli	Lactobacillales	Lactobacillaceae	Lactobacillus	Lactobacillus_paralimentarius	2|1239|91061|186826|33958|1578|83526	0	0	0	0	0	0	0	0	0	0	0	0	0	0	0	0	0	0	0	0	0	0	0	0	0	0	0	0.00077	0	0	0	0	0	0	0	0	0	0	0	0	0	0
Bacteria	Firmicutes	Bacilli	Lactobacillales	Lactobacillaceae	Lactobacillus	Lactobacillus_paraplantarum	2|1239|91061|186826|33958|1578|60520	0	0	0	0	0	0	0	0	0	0	0	0	0	0	0	0	0	0	0	0	0	0	0	0	0	0	0	0	0	0	0	0	0	0	0	0	0	0	0	0	0	0
Bacteria	Firmicutes	Bacilli	Lactobacillales	Lactobacillaceae	Lactobacillus	Lactobacillus_paucivorans	2|1239|91061|186826|33958|1578|616990	0	0	0	0	0	0	0	0	0	0	0	0	0	0	0	0	0	0	0	0	0	0	0	0	0	0	0	0	0	0	0	0	0	0	0	0	0	0	0	0	0	0
Bacteria	Firmicutes	Bacilli	Lactobacillales	Lactobacillaceae	Lactobacillus	Lactobacillus_plantarum	2|1239|91061|186826|33958|1578|1590	0	0	0	0	0	0	0	0	0	0	0	0	0	0	0	0	0	0	0	0	0	0	0	0	0	0	0	0.0382	0.01124	0	0.00421	0	0	0	0	0	0	0	0	0	0	0
Bacteria	Firmicutes	Bacilli	Lactobacillales	Lactobacillaceae	Lactobacillus	Lactobacillus_pontis	2|1239|91061|186826|33958|1578|35787	0	0	0	0	0	0	0	0	0	0	0	0	0	0	0	0	0	0	0	0	0	0	0	0	0	0	0	0	0	0	0	0	0	0	0	0	0	0	0	0	0	0
Bacteria	Firmicutes	Bacilli	Lactobacillales	Lactobacillaceae	Lactobacillus	Lactobacillus_reuteri	2|1239|91061|186826|33958|1578|1598	0.96109	0.96109	2.48326	0.96491	2.13534	3.59117	2.82514	3.67724	3.13717	2.48185	0.14629	0	0	0	0	0.14954	0	0	0	0	0	0	0	0	0.84522	1.07464	0.38187	0.45163	2.03015	12.15299	6.99264	6.25305	1.10879	3.12369	2.42701	5.29553	0.68267	0.59854	1.47699	0	0	0
Bacteria	Firmicutes	Bacilli	Lactobacillales	Lactobacillaceae	Lactobacillus	Lactobacillus_saerimneri	2|1239|91061|186826|33958|1578|228229	0.04373	0.04373	0.19089	0.06257	0.16645	0.20521	0.15629	0.21474	0.23987	0.13944	0	0	0	0	0	0	0	0	0	0	0	0	0	0	0.16387	0.22019	0.10153	0.22701	0.43164	0.38623	0.52023	0.34314	0.29103	0.23485	0.07362	0.16828	0.30377	0.07704	0.1976	0	0	0
Bacteria	Firmicutes	Bacilli	Lactobacillales	Lactobacillaceae	Lactobacillus	Lactobacillus_sakei	2|1239|91061|186826|33958|1578|1599	0	0	0	0	0	0	0	0	0	0	0	0	0	0	0	0	0	0	0	0	0	0	0	0	0	0	0	0	0	0	0	0	0	0	0	0	0	0	0	0	0	0
Bacteria	Firmicutes	Bacilli	Lactobacillales	Lactobacillaceae	Lactobacillus	Lactobacillus_salivarius	2|1239|91061|186826|33958|1578|1624	1.06497	1.06497	5.1387	1.45689	4.41465	11.39759	8.09794	12.46905	9.85751	7.31281	0.03998	0	0	0	0	0.71771	0	0	0	0	0	0	0	0	1.30067	5.89905	0.66572	10.50003	1.94449	7.07955	3.12916	2.1729	13.36704	21.47976	5.38845	8.74138	15.06905	2.717	9.36515	0	0	0
Bacteria	Firmicutes	Bacilli	Lactobacillales	Lactobacillaceae	Lactobacillus	Lactobacillus_senioris	2|1239|91061|186826|33958|1578|931534	0	0	0	0	0	0	0	0	0	0	0	0	0	0	0	0	0	0	0	0	0	0	0	0	0	0	0	0	0	0	0	0	0	0	0	0	0	0	0	0	0	0
Bacteria	Firmicutes	Bacilli	Lactobacillales	Lactobacillaceae	Lactobacillus	Lactobacillus_senmaizukei	2|1239|91061|186826|33958|1578|431273	0	0	0	0	0	0	0	0	0	0	0	0	0	0	0	0	0	0	0	0	0	0	0	0	0	0	0	0	0	0	0	0	0	0	0	0	0	0	0	0	0	0
Bacteria	Firmicutes	Bacilli	Lactobacillales	Lactobacillaceae	Lactobacillus	Lactobacillus_similis	2|1239|91061|186826|33958|1578|414682	0	0	0	0	0	0	0	0	0	0	0	0	0	0	0	0	0	0	0	0	0	0	0	0	0.00225	0	0	0.09723	0.00831	0.0116	0.01729	0.00092	0.21394	0	0	0	0	0	0	0	0	0
Bacteria	Firmicutes	Bacilli	Lactobacillales	Lactobacillaceae	Lactobacillus	Lactobacillus_tucceti	2|1239|91061|186826|33958|1578|238012	0	0	0	0	0	0	0	0	0	0	0	0	0	0	0	0	0	0	0	0	0	0	0	0	0	0	0	0	0	0	0	0	0	0	0	0	0	0	0	0	0	0
Bacteria	Firmicutes	Bacilli	Lactobacillales	Lactobacillaceae	Lactobacillus	Lactobacillus_vaccinostercus	2|1239|91061|186826|33958|1578|176291	0	0	0	0	0	0	0	0	0	0	0	0	0	0	0	0	0	0	0	0	0	0	0	0	0.01369	0.01618	0	0.82176	0.92938	0.0561	0.08345	0.00479	0.09818	0	0	0.0491	0	0	0	0	0	0
Bacteria	Firmicutes	Bacilli	Lactobacillales	Lactobacillaceae	Lactobacillus	Lactobacillus_vaginalis	2|1239|91061|186826|33958|1578|1633	0.814	0.814	1.41374	0.45446	1.20527	0.60267	0.43172	0.63327	0.34316	0.43009	0.20835	0	0	0	0	0	0	0	0	0	0	0	0	0	2.49482	1.09349	0.31838	0.6012	2.90265	5.16008	8.50065	5.92954	0.44475	0.34647	0.3317	1.25246	0.10728	0.07354	0.3629	0	0	0
Bacteria	Firmicutes	Bacilli	Lactobacillales	Lactobacillaceae	Pediococcus		2|1239|91061|186826|33958|1253	0	0	0	0	0	0	0	0	0	0	0	0	0	0	0	0	0	0	0	0	0	0	0	0	0	0	0	0	0	0	0	0	0	0	0	0	0	0	0	0	0	0
Bacteria	Firmicutes	Bacilli	Lactobacillales	Lactobacillaceae	Pediococcus	Pediococcus_acidilactici	2|1239|91061|186826|33958|1253|1254	0	0	0	0	0	0	0	0	0	0	0	0	0	0	0	0	0	0	0	0	0	0	0	0	0	0	0	0	0	0	0	0	0	0	0	0	0	0	0	0	0	0
Bacteria	Firmicutes	Bacilli	Lactobacillales	Lactobacillaceae	Pediococcus	Pediococcus_pentosaceus	2|1239|91061|186826|33958|1253|1255	0	0	0	0	0	0	0	0	0	0	0	0	0	0	0	0	0	0	0	0	0	0	0	0	0	0	0	0	0	0	0	0	0	0	0	0	0	0	0	0	0	0
Bacteria	Firmicutes	Bacilli	Lactobacillales	Lactobacillaceae	Pediococcus	Pediococcus_stilesii	2|1239|91061|186826|33958|1253|331679	0	0	0	0	0	0	0	0	0	0	0	0	0	0	0	0	0	0	0	0	0	0	0	0	0	0	0	0	0	0	0	0	0	0	0	0	0	0	0	0	0	0
Bacteria	Firmicutes	Bacilli	Lactobacillales	Leuconostocaceae			2|1239|91061|186826|81850	0.01913	0.01913	0.15327	0.01073	0.05586	0.19503	0.15846	0.22954	0.21198	0.13896	0	0	0	0	0.20865	0	0	0	0	0	0	0	0	0	0.49173	0.03363	0.00107	6.06534	0.75513	1.98377	0.26025	0.17868	0.71193	0.36982	0.11456	0.15231	0.35625	0.0342	0.00554	0	0	0
Bacteria	Firmicutes	Bacilli	Lactobacillales	Leuconostocaceae	Leuconostoc		2|1239|91061|186826|81850|1243	0	0	0	0	0	0	0	0	0	0	0	0	0	0	0	0	0	0	0	0	0	0	0	0	0.00724	0	0	0	0	0	0	0	0	0	0	0	0	0	0	0	0	0
Bacteria	Firmicutes	Bacilli	Lactobacillales	Leuconostocaceae	Leuconostoc	Leuconostoc_citreum	2|1239|91061|186826|81850|1243|33964	0	0	0	0	0	0	0	0	0	0	0	0	0	0	0	0	0	0	0	0	0	0	0	0	0.00724	0	0	0	0	0	0	0	0	0	0	0	0	0	0	0	0	0
Bacteria	Firmicutes	Bacilli	Lactobacillales	Leuconostocaceae	Oenococcus		2|1239|91061|186826|81850|46254	0	0	0	0	0	0	0	0	0	0	0	0	0	0	0	0	0	0	0	0	0	0	0	0	0	0	0	0.00527	0.00641	0.00156	0	0	0	0	0	0	0	0	0	0	0	0
Bacteria	Firmicutes	Bacilli	Lactobacillales	Leuconostocaceae	Oenococcus	Oenococcus_alcoholitolerans	2|1239|91061|186826|81850|46254|931074	0	0	0	0	0	0	0	0	0	0	0	0	0	0	0	0	0	0	0	0	0	0	0	0	0	0	0	0.00527	0.00641	0.00156	0	0	0	0	0	0	0	0	0	0	0	0
Bacteria	Firmicutes	Bacilli	Lactobacillales	Leuconostocaceae	Weissella		2|1239|91061|186826|81850|46255	0.01913	0.01913	0.15327	0.01073	0.05586	0.19503	0.15846	0.22954	0.21198	0.13896	0	0	0	0	0.20865	0	0	0	0	0	0	0	0	0	0.48449	0.03363	0.00107	6.06007	0.74872	1.98222	0.26025	0.17868	0.71193	0.36982	0.11456	0.15231	0.35625	0.0342	0.00554	0	0	0
Bacteria	Firmicutes	Bacilli	Lactobacillales	Leuconostocaceae	Weissella	Weissella_ceti	2|1239|91061|186826|81850|46255|759620	0	0	0	0	0	0	0	0	0	0	0	0	0	0	0	0	0	0	0	0	0	0	0	0	0	0	0	0	0	0	0	0	0	0	0	0	0	0	0	0	0	0
Bacteria	Firmicutes	Bacilli	Lactobacillales	Leuconostocaceae	Weissella	Weissella_cibaria	2|1239|91061|186826|81850|46255|137591	0	0	0	0	0	0	0	0	0	0	0	0	0	0	0	0	0	0	0	0	0	0	0	0	0	0	0	0	0	0	0	0	0	0	0	0	0	0	0	0	0	0
Bacteria	Firmicutes	Bacilli	Lactobacillales	Leuconostocaceae	Weissella	Weissella_confusa	2|1239|91061|186826|81850|46255|1583	0	0	0	0	0	0	0	0	0	0	0	0	0	0	0	0	0	0	0	0	0	0	0	0	0	0	0	0	0	0	0	0	0	0	0	0	0	0	0	0	0	0
Bacteria	Firmicutes	Bacilli	Lactobacillales	Leuconostocaceae	Weissella	Weissella_hellenica	2|1239|91061|186826|81850|46255|46256	0	0	0	0	0	0	0	0	0	0	0	0	0	0	0	0	0	0	0	0	0	0	0	0	0	0	0	0.0192	0	0	0	0	0	0	0	0	0	0	0	0	0	0
Bacteria	Firmicutes	Bacilli	Lactobacillales	Leuconostocaceae	Weissella	Weissella_jogaejeotgali	2|1239|91061|186826|81850|46255|1631871	0.00302	0.00302	0.03227	0.00323	0.01412	0.03707	0.04437	0.05353	0.05478	0.04579	0	0	0	0	0	0	0	0	0	0	0	0	0	0	0.07917	0.00808	0	1.1402	0.14598	0.41832	0.05909	0.04764	0.12397	0.08546	0.02668	0.04103	0.08412	0.00668	0	0	0	0
Bacteria	Firmicutes	Bacilli	Lactobacillales	Leuconostocaceae	Weissella	Weissella_paramesenteroides	2|1239|91061|186826|81850|46255|1249	0	0	0.00065	0	0	0.0474	0.02137	0.01892	0.06869	0.01243	0	0	0	0	0	0	0	0	0	0	0	0	0	0	0.07673	0.00907	0	3.03091	0.34252	0.2027	0.04719	0.02897	0.42999	0.08752	0.01542	0.05291	0.11243	0.01303	0	0	0	0
Bacteria	Firmicutes	Bacilli	Lactobacillales	Leuconostocaceae	Weissella	Weissella_thailandensis	2|1239|91061|186826|81850|46255|89061	0.01611	0.01611	0.12035	0.0075	0.04174	0.11056	0.09272	0.15708	0.08852	0.08074	0	0	0	0	0.20865	0	0	0	0	0	0	0	0	0	0.32859	0.01648	0.00107	1.86976	0.26022	1.3612	0.15397	0.10207	0.15796	0.19685	0.07246	0.05838	0.1597	0.01449	0.00554	0	0	0
Bacteria	Firmicutes	Bacilli	Lactobacillales	Streptococcaceae			2|1239|91061|186826|1300	0	0	0	0	0	0	0	0	0	0	0.00962	0.01022	0	0	0	0	0	0	0	0	0	5.61927	0	0	0	0	0	0	0	0	0	0	0	0.01542	0	0.0568	0	0	0	0	0	0
Bacteria	Firmicutes	Bacilli	Lactobacillales	Streptococcaceae	Lactococcus		2|1239|91061|186826|1300|1357	0	0	0	0	0	0	0	0	0	0	0.00962	0	0	0	0	0	0	0	0	0	0	5.61927	0	0	0	0	0	0	0	0	0	0	0	0	0	0.0568	0	0	0	0	0	0
Bacteria	Firmicutes	Bacilli	Lactobacillales	Streptococcaceae	Lactococcus	Lactococcus_chungangensis	2|1239|91061|186826|1300|1357|451457	0	0	0	0	0	0	0	0	0	0	0	0	0	0	0	0	0	0	0	0	0	0	0	0	0	0	0	0	0	0	0	0	0	0	0	0	0	0	0	0	0	0
Bacteria	Firmicutes	Bacilli	Lactobacillales	Streptococcaceae	Lactococcus	Lactococcus_garvieae	2|1239|91061|186826|1300|1357|1363	0	0	0	0	0	0	0	0	0	0	0	0	0	0	0	0	0	0	0	0	0	0	0	0	0	0	0	0	0	0	0	0	0	0	0	0.0568	0	0	0	0	0	0
Bacteria	Firmicutes	Bacilli	Lactobacillales	Streptococcaceae	Lactococcus	Lactococcus_lactis	2|1239|91061|186826|1300|1357|1358	0	0	0	0	0	0	0	0	0	0	0	0	0	0	0	0	0	0	0	0	0	0	0	0	0	0	0	0	0	0	0	0	0	0	0	0	0	0	0	0	0	0
Bacteria	Firmicutes	Bacilli	Lactobacillales	Streptococcaceae	Lactococcus	Lactococcus_petauri	2|1239|91061|186826|1300|1357|1940789	0	0	0	0	0	0	0	0	0	0	0	0	0	0	0	0	0	0	0	0	0	0	0	0	0	0	0	0	0	0	0	0	0	0	0	0	0	0	0	0	0	0
Bacteria	Firmicutes	Bacilli	Lactobacillales	Streptococcaceae	Lactococcus	Lactococcus_piscium	2|1239|91061|186826|1300|1357|1364	0	0	0	0	0	0	0	0	0	0	0.00962	0	0	0	0	0	0	0	0	0	0	5.61927	0	0	0	0	0	0	0	0	0	0	0	0	0	0	0	0	0	0	0	0
Bacteria	Firmicutes	Bacilli	Lactobacillales	Streptococcaceae	Lactococcus	Lactococcus_raffinolactis	2|1239|91061|186826|1300|1357|1366	0	0	0	0	0	0	0	0	0	0	0	0	0	0	0	0	0	0	0	0	0	0	0	0	0	0	0	0	0	0	0	0	0	0	0	0	0	0	0	0	0	0
Bacteria	Firmicutes	Bacilli	Lactobacillales	Streptococcaceae	Streptococcus		2|1239|91061|186826|1300|1301	0	0	0	0	0	0	0	0	0	0	0	0.01022	0	0	0	0	0	0	0	0	0	0	0	0	0	0	0	0	0	0	0	0	0	0.01542	0	0	0	0	0	0	0	0
Bacteria	Firmicutes	Bacilli	Lactobacillales	Streptococcaceae	Streptococcus	Streptococcus_ferus	2|1239|91061|186826|1300|1301|1345	0	0	0	0	0	0	0	0	0	0	0	0	0	0	0	0	0	0	0	0	0	0	0	0	0	0	0	0	0	0	0	0	0	0.01542	0	0	0	0	0	0	0	0
Bacteria	Firmicutes	Bacilli	Lactobacillales	Streptococcaceae	Streptococcus	Streptococcus_henryi	2|1239|91061|186826|1300|1301|439219	0	0	0	0	0	0	0	0	0	0	0	0	0	0	0	0	0	0	0	0	0	0	0	0	0	0	0	0	0	0	0	0	0	0	0	0	0	0	0	0	0	0
Bacteria	Firmicutes	Bacilli	Lactobacillales	Streptococcaceae	Streptococcus	Streptococcus_hongkongensis	2|1239|91061|186826|1300|1301|910939	0	0	0	0	0	0	0	0	0	0	0	0	0	0	0	0	0	0	0	0	0	0	0	0	0	0	0	0	0	0	0	0	0	0	0	0	0	0	0	0	0	0
Bacteria	Firmicutes	Bacilli	Lactobacillales	Streptococcaceae	Streptococcus	Streptococcus_infantarius	2|1239|91061|186826|1300|1301|102684	0	0	0	0	0	0	0	0	0	0	0	0	0	0	0	0	0	0	0	0	0	0	0	0	0	0	0	0	0	0	0	0	0	0	0	0	0	0	0	0	0	0
Bacteria	Firmicutes	Bacilli	Lactobacillales	Streptococcaceae	Streptococcus	Streptococcus_infantis	2|1239|91061|186826|1300|1301|68892	0	0	0	0	0	0	0	0	0	0	0	0	0	0	0	0	0	0	0	0	0	0	0	0	0	0	0	0	0	0	0	0	0	0	0	0	0	0	0	0	0	0
Bacteria	Firmicutes	Bacilli	Lactobacillales	Streptococcaceae	Streptococcus	Streptococcus_iniae	2|1239|91061|186826|1300|1301|1346	0	0	0	0	0	0	0	0	0	0	0	0	0	0	0	0	0	0	0	0	0	0	0	0	0	0	0	0	0	0	0	0	0	0	0	0	0	0	0	0	0	0
Bacteria	Firmicutes	Bacilli	Lactobacillales	Streptococcaceae	Streptococcus	Streptococcus_oralis	2|1239|91061|186826|1300|1301|1303	0	0	0	0	0	0	0	0	0	0	0	0	0	0	0	0	0	0	0	0	0	0	0	0	0	0	0	0	0	0	0	0	0	0	0	0	0	0	0	0	0	0
Bacteria	Firmicutes	Bacilli	Lactobacillales	Streptococcaceae	Streptococcus	Streptococcus_parasanguinis	2|1239|91061|186826|1300|1301|1318	0	0	0	0	0	0	0	0	0	0	0	0	0	0	0	0	0	0	0	0	0	0	0	0	0	0	0	0	0	0	0	0	0	0	0	0	0	0	0	0	0	0
Bacteria	Firmicutes	Bacilli	Lactobacillales	Streptococcaceae	Streptococcus	Streptococcus_parauberis	2|1239|91061|186826|1300|1301|1348	0	0	0	0	0	0	0	0	0	0	0	0.01022	0	0	0	0	0	0	0	0	0	0	0	0	0	0	0	0	0	0	0	0	0	0	0	0	0	0	0	0	0	0
Bacteria	Firmicutes	Bacilli	Lactobacillales	Streptococcaceae	Streptococcus	Streptococcus_pluranimalium	2|1239|91061|186826|1300|1301|82348	0	0	0	0	0	0	0	0	0	0	0	0	0	0	0	0	0	0	0	0	0	0	0	0	0	0	0	0	0	0	0	0	0	0	0	0	0	0	0	0	0	0
Bacteria	Firmicutes	Bacilli	Lactobacillales	Streptococcaceae	Streptococcus	Streptococcus_pyogenes	2|1239|91061|186826|1300|1301|1314	0	0	0	0	0	0	0	0	0	0	0	0	0	0	0	0	0	0	0	0	0	0	0	0	0	0	0	0	0	0	0	0	0	0	0	0	0	0	0	0	0	0
Bacteria	Firmicutes	Bacilli	Lactobacillales	Streptococcaceae	Streptococcus	Streptococcus_suis	2|1239|91061|186826|1300|1301|1307	0	0	0	0	0	0	0	0	0	0	0	0	0	0	0	0	0	0	0	0	0	0	0	0	0	0	0	0	0	0	0	0	0	0	0	0	0	0	0	0	0	0
Bacteria	Firmicutes	Bacilli	Lactobacillales	Streptococcaceae	Streptococcus	Streptococcus_uberis	2|1239|91061|186826|1300|1301|1349	0	0	0	0	0	0	0	0	0	0	0	0	0	0	0	0	0	0	0	0	0	0	0	0	0	0	0	0	0	0	0	0	0	0	0	0	0	0	0	0	0	0
Bacteria	Firmicutes	Bacilli	Lactobacillales	Streptococcaceae	Streptococcus	Streptococcus_varani	2|1239|91061|186826|1300|1301|1608583	0	0	0	0	0	0	0	0	0	0	0	0	0	0	0	0	0	0	0	0	0	0	0	0	0	0	0	0	0	0	0	0	0	0	0	0	0	0	0	0	0	0
Bacteria	Firmicutes	Clostridia					2|1239|186801	19.12616	19.12616	17.49234	15.84183	18.77379	7.61476	9.24803	7.28014	11.37939	9.33446	0.03179	0	0	0	0	0.3248	0	0	0	0	0	0	0	0	0.78294	0.2943	2.97467	3.85709	0.6019	0.10927	0.28097	0.02294	0.63501	0.04371	0.01062	0.13489	1.64961	0.11754	0.67489	0	0	0
Bacteria	Firmicutes	Clostridia	Clostridiales				2|1239|186801|186802	19.12616	19.12616	17.49234	15.84183	18.77379	7.61476	9.24803	7.28014	11.37939	9.33446	0.03179	0	0	0	0	0.3248	0	0	0	0	0	0	0	0	0.78294	0.2943	2.97467	3.85709	0.6019	0.10927	0.28097	0.02294	0.63501	0.04371	0.01062	0.13489	1.64961	0.11754	0.67489	0	0	0
Bacteria	Firmicutes	Clostridia	Clostridiales	Clostridiaceae			2|1239|186801|186802|31979	0.67536	0.67536	0.6569	0.64279	1.21813	0.84284	1.07499	0.89938	1.20615	0.99689	0	0	0	0	0	0.2716	0	0	0	0	0	0	0	0	0.02902	0.08921	0.03537	0.07162	0.04345	0.01454	0	0.00027	0.2439	0	0	0.01792	0.14411	0	0.09551	0	0	0
Bacteria	Firmicutes	Clostridia	Clostridiales	Clostridiaceae	Butyricicoccus		2|1239|186801|186802|31979|580596	0.65627	0.65627	0.41601	0.61412	0.78535	0.74387	0.93079	0.83559	1.14066	0.79595	0	0	0	0	0	0	0	0	0	0	0	0	0	0	0.02902	0.08568	0.03277	0.06256	0.04254	0.00518	0	0.00027	0.03225	0	0	0.01792	0.06047	0	0.09551	0	0	0
Bacteria	Firmicutes	Clostridia	Clostridiales	Clostridiaceae	Butyricicoccus	Butyricicoccus_pullicaecorum	2|1239|186801|186802|31979|580596|501571	0.65627	0.65627	0.41601	0.61412	0.78535	0.74387	0.93079	0.83559	1.14066	0.79595	0	0	0	0	0	0	0	0	0	0	0	0	0	0	0.02902	0.08568	0.03277	0.06256	0.04254	0.00518	0	0.00027	0.03225	0	0	0.01792	0.06047	0	0.09551	0	0	0
Bacteria	Firmicutes	Clostridia	Clostridiales	Clostridiaceae	Candidatus_Arthromitus		2|1239|186801|186802|31979|49082	0	0	0	0	0	0	0	0	0	0	0	0	0	0	0	0	0	0	0	0	0	0	0	0	0	0	0	0	0	0	0	0	0	0	0	0	0	0	0	0	0	0
Bacteria	Firmicutes	Clostridia	Clostridiales	Clostridiaceae	Candidatus_Arthromitus	Candidatus_Arthromitus_sp_SFB_turkey	2|1239|186801|186802|31979|49082|1840217	0	0	0	0	0	0	0	0	0	0	0	0	0	0	0	0	0	0	0	0	0	0	0	0	0	0	0	0	0	0	0	0	0	0	0	0	0	0	0	0	0	0
Bacteria	Firmicutes	Clostridia	Clostridiales	Clostridiaceae	Clostridiaceae_unclassified			0	0	0	0	0	0	0	0	0	0	0	0	0	0	0	0	0	0	0	0	0	0	0	0	0	0	0	0	0	0	0	0	0	0	0	0	0	0	0	0	0	0
Bacteria	Firmicutes	Clostridia	Clostridiales	Clostridiaceae	Clostridiaceae_unclassified	Clostridiaceae_bacterium_14S0207	2|1239|186801|186802|31979||2082193	0	0	0	0	0	0	0	0	0	0	0	0	0	0	0	0	0	0	0	0	0	0	0	0	0	0	0	0	0	0	0	0	0	0	0	0	0	0	0	0	0	0
Bacteria	Firmicutes	Clostridia	Clostridiales	Clostridiaceae	Clostridium		2|1239|186801|186802|31979|1485	0.01909	0.01909	0.24089	0.02867	0.43279	0.09897	0.1442	0.0638	0.06549	0.20095	0	0	0	0	0	0	0	0	0	0	0	0	0	0	0	0.00353	0.0026	0.00906	0.00091	0.00936	0	0	0.21165	0	0	0	0.08364	0	0	0	0	0
Bacteria	Firmicutes	Clostridia	Clostridiales	Clostridiaceae	Clostridium	Clostridium_baratii	2|1239|186801|186802|31979|1485|1561	0	0	0	0	0	0	0	0	0	0	0	0	0	0	0	0	0	0	0	0	0	0	0	0	0	0	0	0	0	0	0	0	0	0	0	0	0	0	0	0	0	0
Bacteria	Firmicutes	Clostridia	Clostridiales	Clostridiaceae	Clostridium	Clostridium_butyricum	2|1239|186801|186802|31979|1485|1492	0	0	0	0	0	0	0	0	0	0	0	0	0	0	0	0	0	0	0	0	0	0	0	0	0	0	0	0	0	0	0	0	0	0	0	0	0	0	0	0	0	0
Bacteria	Firmicutes	Clostridia	Clostridiales	Clostridiaceae	Clostridium	Clostridium_combesii	2|1239|186801|186802|31979|1485|39481	0	0	0	0	0	0	0	0	0	0	0	0	0	0	0	0	0	0	0	0	0	0	0	0	0	0	0	0	0	0	0	0	0	0	0	0	0	0	0	0	0	0
Bacteria	Firmicutes	Clostridia	Clostridiales	Clostridiaceae	Clostridium	Clostridium_novyi	2|1239|186801|186802|31979|1485|1542	0	0	0	0	0	0	0	0	0	0	0	0	0	0	0	0	0	0	0	0	0	0	0	0	0	0	0	0	0	0	0	0	0	0	0	0	0	0	0	0	0	0
Bacteria	Firmicutes	Clostridia	Clostridiales	Clostridiaceae	Clostridium	Clostridium_paraputrificum	2|1239|186801|186802|31979|1485|29363	0	0	0	0	0	0	0	0	0	0	0	0	0	0	0	0	0	0	0	0	0	0	0	0	0	0	0	0	0	0	0	0	0	0	0	0	0	0	0	0	0	0
Bacteria	Firmicutes	Clostridia	Clostridiales	Clostridiaceae	Clostridium	Clostridium_perfringens	2|1239|186801|186802|31979|1485|1502	0	0	0	0	0	0	0	0	0	0	0	0	0	0	0	0	0	0	0	0	0	0	0	0	0	0	0	0	0	0.00936	0	0	0	0	0	0	0	0	0	0	0	0
Bacteria	Firmicutes	Clostridia	Clostridiales	Clostridiaceae	Clostridium	Clostridium_sp_7_2_43FAA	2|1239|186801|186802|31979|1485|457396	0	0	0	0	0	0	0	0	0	0	0	0	0	0	0	0	0	0	0	0	0	0	0	0	0	0	0	0	0	0	0	0	0	0	0	0	0	0	0	0	0	0
Bacteria	Firmicutes	Clostridia	Clostridiales	Clostridiaceae	Clostridium	Clostridium_sp_C105KSO13	2|1239|186801|186802|31979|1485|1776045	0	0	0	0	0	0	0	0	0	0	0	0	0	0	0	0	0	0	0	0	0	0	0	0	0	0	0	0	0	0	0	0	0	0	0	0	0	0	0	0	0	0
Bacteria	Firmicutes	Clostridia	Clostridiales	Clostridiaceae	Clostridium	Clostridium_sp_CAG_242	2|1239|186801|186802|31979|1485|1262783	0	0	0	0	0	0	0	0	0	0	0	0	0	0	0	0	0	0	0	0	0	0	0	0	0	0	0	0	0	0	0	0	0	0	0	0	0	0	0	0	0	0
Bacteria	Firmicutes	Clostridia	Clostridiales	Clostridiaceae	Clostridium	Clostridium_sp_CAG_253	2|1239|186801|186802|31979|1485|1262785	0	0	0	0	0	0	0	0	0	0	0	0	0	0	0	0	0	0	0	0	0	0	0	0	0	0	0	0	0	0	0	0	0	0	0	0	0	0	0	0	0	0
Bacteria	Firmicutes	Clostridia	Clostridiales	Clostridiaceae	Clostridium	Clostridium_sp_CAG_678	2|1239|186801|186802|31979|1485|1262831	0.01909	0.01909	0.24089	0.02867	0.43279	0.09897	0.1442	0.0638	0.06549	0.20095	0	0	0	0	0	0	0	0	0	0	0	0	0	0	0	0.00353	0.0026	0.00906	0.00091	0	0	0	0.21165	0	0	0	0.08364	0	0	0	0	0
Bacteria	Firmicutes	Clostridia	Clostridiales	Clostridiaceae	Proteiniclasticum		2|1239|186801|186802|31979|1155385	0	0	0	0	0	0	0	0	0	0	0	0	0	0	0	0.2716	0	0	0	0	0	0	0	0	0	0	0	0	0	0	0	0	0	0	0	0	0	0	0	0	0	0
Bacteria	Firmicutes	Clostridia	Clostridiales	Clostridiaceae	Proteiniclasticum	Proteiniclasticum_ruminis	2|1239|186801|186802|31979|1155385|398199	0	0	0	0	0	0	0	0	0	0	0	0	0	0	0	0.2716	0	0	0	0	0	0	0	0	0	0	0	0	0	0	0	0	0	0	0	0	0	0	0	0	0	0
Bacteria	Firmicutes	Clostridia	Clostridiales	Clostridiaceae	Proteiniclasticum	Proteiniclasticum_sp	2|1239|186801|186802|31979|1155385|2053595	0	0	0	0	0	0	0	0	0	0	0	0	0	0	0	0	0	0	0	0	0	0	0	0	0	0	0	0	0	0	0	0	0	0	0	0	0	0	0	0	0	0
Bacteria	Firmicutes	Clostridia	Clostridiales	Clostridiales_unclassified				0.73699	0.73699	0.86862	0.54157	0.82038	0.3386	0.36266	0.34613	0.39122	0.46725	0	0	0	0	0	0	0	0	0	0	0	0	0	0	0.02193	0.0016	0.05724	0.02925	0.03767	0.05107	0.05233	0.01499	0.01973	0.00286	0.00894	0.03693	0.29494	0.00794	0.02312	0	0	0
Bacteria	Firmicutes	Clostridia	Clostridiales	Clostridiales_unclassified			2|1239|186801|186802|	0	0	0	0	0	0	0	0	0	0	0	0	0	0	0	0	0	0	0	0	0	0	0	0	0	0	0	0	0	0	0	0	0	0	0	0	0	0	0	0	0	0
Bacteria	Firmicutes	Clostridia	Clostridiales	Clostridiales_unclassified	Clostridiales_unclassified			0.73699	0.73699	0.86862	0.54157	0.82038	0.3386	0.36266	0.34613	0.39122	0.46725	0	0	0	0	0	0	0	0	0	0	0	0	0	0	0.02193	0.0016	0.05724	0.02925	0.03767	0.05107	0.05233	0.01499	0.01973	0.00286	0.00894	0.03693	0.29494	0.00794	0.02312	0	0	0
Bacteria	Firmicutes	Clostridia	Clostridiales	Clostridiales_unclassified	Clostridiales_unclassified		2|1239|186801|186802||	0	0	0	0	0	0	0	0	0	0	0	0	0	0	0	0	0	0	0	0	0	0	0	0	0	0	0	0	0	0	0	0	0	0	0	0	0	0	0	0	0	0
Bacteria	Firmicutes	Clostridia	Clostridiales	Clostridiales_unclassified	Clostridiales_unclassified	Clostridiales_bacterium_CHKCI001	2|1239|186801|186802|||1780378	0.39658	0.39658	0.17176	0.1336	0.14466	0.2227	0.2013	0.23194	0.2178	0.31637	0	0	0	0	0	0	0	0	0	0	0	0	0	0	0.00291	0	0.01581	0.00157	0.00532	0.05107	0.03864	0.01499	0.01973	0.00286	0.00894	0.03693	0.27837	0.00794	0.02312	0	0	0
Bacteria	Firmicutes	Clostridia	Clostridiales	Clostridiales_unclassified	Clostridiales_unclassified	Clostridiales_bacterium_CHKCI006	2|1239|186801|186802|||1780379	0.34041	0.34041	0.69686	0.40797	0.67572	0.1159	0.16137	0.11419	0.17342	0.15088	0	0	0	0	0	0	0	0	0	0	0	0	0	0	0.01902	0.0016	0.04142	0.02768	0.03236	0	0.0137	0	0	0	0	0	0.01657	0	0	0	0	0
Bacteria	Firmicutes	Clostridia	Clostridiales	Eubacteriaceae			2|1239|186801|186802|186806	0.00565	0.00565	0.02963	0.0439	0.02976	0.04308	0.06959	0.04593	0.0293	0.09556	0	0	0	0	0	0	0	0	0	0	0	0	0	0	0	0	0	0.0008	0	0.01563	0.01093	0.0022	0.01803	0.04085	0.00168	0.0761	0	0.10533	0.00803	0	0	0
Bacteria	Firmicutes	Clostridia	Clostridiales	Eubacteriaceae	Alkalibaculum		2|1239|186801|186802|186806|696745	0	0	0	0	0	0	0	0	0	0	0	0	0	0	0	0	0	0	0	0	0	0	0	0	0	0	0	0	0	0.00374	0.00794	0.00067	0.01803	0.04085	0.00168	0.0761	0	0.10533	0.00803	0	0	0
Bacteria	Firmicutes	Clostridia	Clostridiales	Eubacteriaceae	Alkalibaculum	Alkalibaculum_bacchi	2|1239|186801|186802|186806|696745|645887	0	0	0	0	0	0	0	0	0	0	0	0	0	0	0	0	0	0	0	0	0	0	0	0	0	0	0	0	0	0.00374	0.00794	0.00067	0.01803	0.04085	0.00168	0.0761	0	0.10533	0.00803	0	0	0
Bacteria	Firmicutes	Clostridia	Clostridiales	Eubacteriaceae	Eubacteriaceae_unclassified			0	0	0	0	0	0	0	0	0	0	0	0	0	0	0	0	0	0	0	0	0	0	0	0	0	0	0	0	0	0	0	0	0	0	0	0	0	0	0	0	0	0
Bacteria	Firmicutes	Clostridia	Clostridiales	Eubacteriaceae	Eubacteriaceae_unclassified	Eubacteriaceae_bacterium_CHKCI005	2|1239|186801|186802|186806||1780381	0	0	0	0	0	0	0	0	0	0	0	0	0	0	0	0	0	0	0	0	0	0	0	0	0	0	0	0	0	0	0	0	0	0	0	0	0	0	0	0	0	0
Bacteria	Firmicutes	Clostridia	Clostridiales	Eubacteriaceae	Eubacterium		2|1239|186801|186802|186806|1730	0.00565	0.00565	0.02963	0.0439	0.02976	0.04308	0.06959	0.04593	0.0293	0.09556	0	0	0	0	0	0	0	0	0	0	0	0	0	0	0	0	0	0.0008	0	0.0119	0.00299	0.00153	0	0	0	0	0	0	0	0	0	0
Bacteria	Firmicutes	Clostridia	Clostridiales	Eubacteriaceae	Eubacterium	Eubacterium_aggregans	2|1239|186801|186802|186806|1730|81409	0	0	0	0	0	0	0	0	0	0	0	0	0	0	0	0	0	0	0	0	0	0	0	0	0	0	0	0	0	0.00556	0.00255	0.00153	0	0	0	0	0	0	0	0	0	0
Bacteria	Firmicutes	Clostridia	Clostridiales	Eubacteriaceae	Eubacterium	Eubacterium_eligens	2|1239|186801|186802|186806|1730|39485	0	0	0	0	0	0	0	0	0	0	0	0	0	0	0	0	0	0	0	0	0	0	0	0	0	0	0	0	0	0	0	0	0	0	0	0	0	0	0	0	0	0
Bacteria	Firmicutes	Clostridia	Clostridiales	Eubacteriaceae	Eubacterium	Eubacterium_hallii	2|1239|186801|186802|186806|1730|39488	0	0	0	0	0	0	0	0	0	0	0	0	0	0	0	0	0	0	0	0	0	0	0	0	0	0	0	0	0	0	0	0	0	0	0	0	0	0	0	0	0	0
Bacteria	Firmicutes	Clostridia	Clostridiales	Eubacteriaceae	Eubacterium	Eubacterium_limosum	2|1239|186801|186802|186806|1730|1736	0	0	0	0	0	0	0	0	0	0	0	0	0	0	0	0	0	0	0	0	0	0	0	0	0	0	0	0	0	0	0	0	0	0	0	0	0	0	0	0	0	0
Bacteria	Firmicutes	Clostridia	Clostridiales	Eubacteriaceae	Eubacterium	Eubacterium_maltosivorans	2|1239|186801|186802|186806|1730|2041044	0	0	0	0	0	0	0	0	0	0	0	0	0	0	0	0	0	0	0	0	0	0	0	0	0	0	0	0	0	0	0	0	0	0	0	0	0	0	0	0	0	0
Bacteria	Firmicutes	Clostridia	Clostridiales	Eubacteriaceae	Eubacterium	Eubacterium_sp_An11	2|1239|186801|186802|186806|1730|1965542	0.00565	0.00565	0.02963	0.0439	0.02976	0.04308	0.06959	0.04593	0.0293	0.09556	0	0	0	0	0	0	0	0	0	0	0	0	0	0	0	0	0	0.0008	0	0.00633	0.00044	0	0	0	0	0	0	0	0	0	0	0
Bacteria	Firmicutes	Clostridia	Clostridiales	Eubacteriaceae	Eubacterium	Eubacterium_sp_CAG_180	2|1239|186801|186802|186806|1730|1262882	0	0	0	0	0	0	0	0	0	0	0	0	0	0	0	0	0	0	0	0	0	0	0	0	0	0	0	0	0	0	0	0	0	0	0	0	0	0	0	0	0	0
Bacteria	Firmicutes	Clostridia	Clostridiales	Eubacteriaceae	Eubacterium	Eubacterium_sp_CAG_38	2|1239|186801|186802|186806|1730|1262889	0	0	0	0	0	0	0	0	0	0	0	0	0	0	0	0	0	0	0	0	0	0	0	0	0	0	0	0	0	0	0	0	0	0	0	0	0	0	0	0	0	0
Bacteria	Firmicutes	Clostridia	Clostridiales	Lachnospiraceae			2|1239|186801|186802|186803	8.29	8.29	8.85745	8.1214	9.84701	3.04428	3.22111	2.66618	4.52188	2.89843	0.03179	0	0	0	0	0	0	0	0	0	0	0	0	0	0.4744	0.10502	1.51445	2.54793	0.3172	0.02803	0.14666	0.00549	0.11663	0	0	0.00098	0.40439	0	0.0848	0	0	0
Bacteria	Firmicutes	Clostridia	Clostridiales	Lachnospiraceae	Anaerostipes		2|1239|186801|186802|186803|207244	0	0	0	0	0	0	0	0	0	0	0	0	0	0	0	0	0	0	0	0	0	0	0	0	0	0	0	0	0	0	0	0	0	0	0	0	0	0	0	0	0	0
Bacteria	Firmicutes	Clostridia	Clostridiales	Lachnospiraceae	Anaerostipes	Anaerostipes_caccae	2|1239|186801|186802|186803|207244|105841	0	0	0	0	0	0	0	0	0	0	0	0	0	0	0	0	0	0	0	0	0	0	0	0	0	0	0	0	0	0	0	0	0	0	0	0	0	0	0	0	0	0
Bacteria	Firmicutes	Clostridia	Clostridiales	Lachnospiraceae	Anaerostipes	Anaerostipes_hadrus	2|1239|186801|186802|186803|207244|649756	0	0	0	0	0	0	0	0	0	0	0	0	0	0	0	0	0	0	0	0	0	0	0	0	0	0	0	0	0	0	0	0	0	0	0	0	0	0	0	0	0	0
Bacteria	Firmicutes	Clostridia	Clostridiales	Lachnospiraceae	Anaerotignum		2|1239|186801|186802|186803|2039240	0.88792	0.88792	0.82117	0.39128	1.18771	0.30899	0.27278	0.23806	0.71322	0.26269	0	0	0	0	0	0	0	0	0	0	0	0	0	0	0.05333	0.03671	0.10628	0.13307	0.0947	0	0.01466	0	0.04535	0	0	0	0.06191	0	0.0048	0	0	0
Bacteria	Firmicutes	Clostridia	Clostridiales	Lachnospiraceae	Anaerotignum	Anaerotignum_lactatifermentans	2|1239|186801|186802|186803|2039240|160404	0.88792	0.88792	0.82117	0.39128	1.18771	0.30899	0.27278	0.23806	0.71322	0.26269	0	0	0	0	0	0	0	0	0	0	0	0	0	0	0.05333	0.03671	0.10628	0.13307	0.0947	0	0.01466	0	0.04535	0	0	0	0.06191	0	0.0048	0	0	0
Bacteria	Firmicutes	Clostridia	Clostridiales	Lachnospiraceae	Blautia		2|1239|186801|186802|186803|572511	0.89404	0.89404	2.24119	0.50741	1.46525	0.12871	0.08423	0.10889	0.25878	0.09972	0	0	0	0	0	0	0	0	0	0	0	0	0	0	0.11145	0.00374	0.07022	0.20365	0.04978	0.02658	0.04433	0.00549	0.00016	0	0	0.00098	0	0	0	0	0	0
Bacteria	Firmicutes	Clostridia	Clostridiales	Lachnospiraceae	Blautia	Blautia_obeum	2|1239|186801|186802|186803|572511|40520	0	0	0	0	0	0	0	0	0	0	0	0	0	0	0	0	0	0	0	0	0	0	0	0	0	0	0	0	0	0	0	0	0	0	0	0	0	0	0	0	0	0
Bacteria	Firmicutes	Clostridia	Clostridiales	Lachnospiraceae	Blautia	Blautia_sp_An249	2|1239|186801|186802|186803|572511|1965603	0.89404	0.89404	2.24119	0.50741	1.46525	0.12871	0.08423	0.10889	0.25878	0.09972	0	0	0	0	0	0	0	0	0	0	0	0	0	0	0.11145	0.00374	0.07022	0.20365	0.04978	0.02658	0.04433	0.00549	0.00016	0	0	0.00098	0	0	0	0	0	0
Bacteria	Firmicutes	Clostridia	Clostridiales	Lachnospiraceae	Blautia	Blautia_wexlerae	2|1239|186801|186802|186803|572511|418240	0	0	0	0	0	0	0	0	0	0	0	0	0	0	0	0	0	0	0	0	0	0	0	0	0	0	0	0	0	0	0	0	0	0	0	0	0	0	0	0	0	0
Bacteria	Firmicutes	Clostridia	Clostridiales	Lachnospiraceae	Blautia	Ruminococcus_gnavus	2|1239|186801|186802|186803|572511|33038	0	0	0	0	0	0	0	0	0	0	0	0	0	0	0	0	0	0	0	0	0	0	0	0	0	0	0	0	0	0	0	0	0	0	0	0	0	0	0	0	0	0
Bacteria	Firmicutes	Clostridia	Clostridiales	Lachnospiraceae	Blautia	Ruminococcus_torques	2|1239|186801|186802|186803|572511|33039	0	0	0	0	0	0	0	0	0	0	0	0	0	0	0	0	0	0	0	0	0	0	0	0	0	0	0	0	0	0	0	0	0	0	0	0	0	0	0	0	0	0
Bacteria	Firmicutes	Clostridia	Clostridiales	Lachnospiraceae	Coprococcus		2|1239|186801|186802|186803|33042	0	0	0	0	0	0	0	0	0	0	0	0	0	0	0	0	0	0	0	0	0	0	0	0	0	0	0	0	0	0	0	0	0	0	0	0	0	0	0	0	0	0
Bacteria	Firmicutes	Clostridia	Clostridiales	Lachnospiraceae	Coprococcus	Coprococcus_comes	2|1239|186801|186802|186803|33042|410072	0	0	0	0	0	0	0	0	0	0	0	0	0	0	0	0	0	0	0	0	0	0	0	0	0	0	0	0	0	0	0	0	0	0	0	0	0	0	0	0	0	0
Bacteria	Firmicutes	Clostridia	Clostridiales	Lachnospiraceae	Dorea		2|1239|186801|186802|186803|189330	0	0	0	0	0	0	0	0	0	0	0	0	0	0	0	0	0	0	0	0	0	0	0	0	0	0	0	0	0	0	0	0	0	0	0	0	0	0	0	0	0	0
Bacteria	Firmicutes	Clostridia	Clostridiales	Lachnospiraceae	Dorea	Dorea_formicigenerans	2|1239|186801|186802|186803|189330|39486	0	0	0	0	0	0	0	0	0	0	0	0	0	0	0	0	0	0	0	0	0	0	0	0	0	0	0	0	0	0	0	0	0	0	0	0	0	0	0	0	0	0
Bacteria	Firmicutes	Clostridia	Clostridiales	Lachnospiraceae	Dorea	Dorea_longicatena	2|1239|186801|186802|186803|189330|88431	0	0	0	0	0	0	0	0	0	0	0	0	0	0	0	0	0	0	0	0	0	0	0	0	0	0	0	0	0	0	0	0	0	0	0	0	0	0	0	0	0	0
Bacteria	Firmicutes	Clostridia	Clostridiales	Lachnospiraceae	Fusicatenibacter		2|1239|186801|186802|186803|1407607	0	0	0	0	0	0	0	0	0	0	0	0	0	0	0	0	0	0	0	0	0	0	0	0	0	0	0	0	0	0	0	0	0	0	0	0	0	0	0	0	0	0
Bacteria	Firmicutes	Clostridia	Clostridiales	Lachnospiraceae	Fusicatenibacter	Fusicatenibacter_saccharivorans	2|1239|186801|186802|186803|1407607|1150298	0	0	0	0	0	0	0	0	0	0	0	0	0	0	0	0	0	0	0	0	0	0	0	0	0	0	0	0	0	0	0	0	0	0	0	0	0	0	0	0	0	0
Bacteria	Firmicutes	Clostridia	Clostridiales	Lachnospiraceae	Lachnoclostridium		2|1239|186801|186802|186803|1506553	5.86977	5.86977	5.59841	7.11903	6.97625	2.60496	2.86409	2.31923	3.51338	2.53602	0.03179	0	0	0	0	0	0	0	0	0	0	0	0	0	0.30843	0.06457	1.07709	2.21122	0.11965	0.00097	0.08766	0	0.07112	0	0	0	0.34248	0	0.08	0	0	0
Bacteria	Firmicutes	Clostridia	Clostridiales	Lachnospiraceae	Lachnoclostridium	Clostridium_saccharolyticum	2|1239|186801|186802|186803|1506553|84030	0	0	0.00182	0.03144	0.04515	0.12328	0.10675	0.09693	0.13407	0.10392	0	0	0	0	0	0	0	0	0	0	0	0	0	0	0	0	0	0	0	0	0	0	0.00322	0	0	0	0	0	0	0	0	0
Bacteria	Firmicutes	Clostridia	Clostridiales	Lachnospiraceae	Lachnoclostridium	Lachnoclostridium_sp_An118	2|1239|186801|186802|186803|1506553|1965547	0.38906	0.38906	0.44723	0.2744	0.47145	0.17215	0.15563	0.1403	0.22285	0.14837	0	0	0	0	0	0	0	0	0	0	0	0	0	0	0.01801	0.00218	0.01488	0.02951	0.0115	0	0.00881	0	0.00415	0	0	0	0.00607	0	0.00304	0	0	0
Bacteria	Firmicutes	Clostridia	Clostridiales	Lachnospiraceae	Lachnoclostridium	Lachnoclostridium_sp_An131	2|1239|186801|186802|186803|1506553|1965555	0.28629	0.28629	0.44177	0.40708	0.51218	0.13716	0.18204	0.13823	0.23368	0.17553	0	0	0	0	0	0	0	0	0	0	0	0	0	0	0.05709	0	0.21022	0.24263	0.02572	0	0.0191	0	0.0031	0	0	0	0.02809	0	0.00362	0	0	0
Bacteria	Firmicutes	Clostridia	Clostridiales	Lachnospiraceae	Lachnoclostridium	Lachnoclostridium_sp_An138	2|1239|186801|186802|186803|1506553|1965560	1.16808	1.16808	1.51221	0.77139	1.54063	0.41982	0.49901	0.328	0.69189	0.62113	0	0	0	0	0	0	0	0	0	0	0	0	0	0	0.09541	0.03564	0.52701	0.65818	0.01935	0.00097	0.01815	0	0.00965	0	0	0	0.00713	0	0.00508	0	0	0
Bacteria	Firmicutes	Clostridia	Clostridiales	Lachnospiraceae	Lachnoclostridium	Lachnoclostridium_sp_An14	2|1239|186801|186802|186803|1506553|1965562	0	0	0	0	0.00053	0.01144	0.0108	0.01113	0.02187	0.01167	0	0	0	0	0	0	0	0	0	0	0	0	0	0	0	0	0	0	0	0	0	0	0	0	0	0	0	0	0	0	0	0
Bacteria	Firmicutes	Clostridia	Clostridiales	Lachnospiraceae	Lachnoclostridium	Lachnoclostridium_sp_An169	2|1239|186801|186802|186803|1506553|1965569	0	0	0	0	0.00571	0	0	0	0	0	0	0	0	0	0	0	0	0	0	0	0	0	0	0	0	0	0	0	0	0	0	0	0	0	0	0	0	0	0	0	0	0
Bacteria	Firmicutes	Clostridia	Clostridiales	Lachnospiraceae	Lachnoclostridium	Lachnoclostridium_sp_An181	2|1239|186801|186802|186803|1506553|1965575	0	0	0	0	0	0	0	0	0	0	0	0	0	0	0	0	0	0	0	0	0	0	0	0	0	0	0	0	0	0	0	0	0	0	0	0	0	0	0	0	0	0
Bacteria	Firmicutes	Clostridia	Clostridiales	Lachnospiraceae	Lachnoclostridium	Lachnoclostridium_sp_An196	2|1239|186801|186802|186803|1506553|1965583	3.81029	3.81029	2.32656	5.33531	3.69624	1.49135	1.63859	1.32682	1.87656	1.22519	0.03179	0	0	0	0	0	0	0	0	0	0	0	0	0	0.12217	0.02286	0.29491	1.27484	0.04153	0	0.03976	0	0.04068	0	0	0	0.10783	0	0.066	0	0	0
Bacteria	Firmicutes	Clostridia	Clostridiales	Lachnospiraceae	Lachnoclostridium	Lachnoclostridium_sp_An298	2|1239|186801|186802|186803|1506553|1965627	0.09819	0.09819	0.3507	0.07467	0.28653	0.09043	0.11058	0.10556	0.15172	0.11118	0	0	0	0	0	0	0	0	0	0	0	0	0	0	0.0058	0	0.00931	0.00265	0.01308	0	0	0	0.0048	0	0	0	0.11497	0	0	0	0	0
Bacteria	Firmicutes	Clostridia	Clostridiales	Lachnospiraceae	Lachnoclostridium	Lachnoclostridium_sp_An76	2|1239|186801|186802|186803|1506553|1965654	0.11786	0.11786	0.51811	0.22473	0.41783	0.15931	0.1607	0.17225	0.18073	0.13902	0	0	0	0	0	0	0	0	0	0	0	0	0	0	0.00995	0.00389	0.02076	0.00341	0.00847	0	0.00185	0	0.00552	0	0	0	0.07838	0	0.00226	0	0	0
Bacteria	Firmicutes	Clostridia	Clostridiales	Lachnospiraceae	Lachnospiraceae_unclassified			0	0	0	0	0	0	0	0	0	0	0	0	0	0	0	0	0	0	0	0	0	0	0	0	0	0	0	0	0	0	0	0	0	0	0	0	0	0	0	0	0	0
Bacteria	Firmicutes	Clostridia	Clostridiales	Lachnospiraceae	Lachnospiraceae_unclassified		2|1239|186801|186802|186803|	0	0	0	0	0	0	0	0	0	0	0	0	0	0	0	0	0	0	0	0	0	0	0	0	0	0	0	0	0	0	0	0	0	0	0	0	0	0	0	0	0	0
Bacteria	Firmicutes	Clostridia	Clostridiales	Lachnospiraceae	Lachnospiraceae_unclassified	Eubacterium_rectale	2|1239|186801|186802|186803||39491	0	0	0	0	0	0	0	0	0	0	0	0	0	0	0	0	0	0	0	0	0	0	0	0	0	0	0	0	0	0	0	0	0	0	0	0	0	0	0	0	0	0
Bacteria	Firmicutes	Clostridia	Clostridiales	Lachnospiraceae	Lachnospiraceae_unclassified	Lachnospiraceae_bacterium_28_4	2|1239|186801|186802|186803||397287	0	0	0	0	0	0	0	0	0	0	0	0	0	0	0	0	0	0	0	0	0	0	0	0	0	0	0	0	0	0	0	0	0	0	0	0	0	0	0	0	0	0
Bacteria	Firmicutes	Clostridia	Clostridiales	Lachnospiraceae	Roseburia		2|1239|186801|186802|186803|841	0	0	0	0	0	0	0	0	0	0	0	0	0	0	0	0	0	0	0	0	0	0	0	0	0	0	0	0	0	0	0	0	0	0	0	0	0	0	0	0	0	0
Bacteria	Firmicutes	Clostridia	Clostridiales	Lachnospiraceae	Roseburia	Roseburia_faecis	2|1239|186801|186802|186803|841|301302	0	0	0	0	0	0	0	0	0	0	0	0	0	0	0	0	0	0	0	0	0	0	0	0	0	0	0	0	0	0	0	0	0	0	0	0	0	0	0	0	0	0
Bacteria	Firmicutes	Clostridia	Clostridiales	Lachnospiraceae	Roseburia	Roseburia_intestinalis	2|1239|186801|186802|186803|841|166486	0	0	0	0	0	0	0	0	0	0	0	0	0	0	0	0	0	0	0	0	0	0	0	0	0	0	0	0	0	0	0	0	0	0	0	0	0	0	0	0	0	0
Bacteria	Firmicutes	Clostridia	Clostridiales	Lachnospiraceae	Roseburia	Roseburia_inulinivorans	2|1239|186801|186802|186803|841|360807	0	0	0	0	0	0	0	0	0	0	0	0	0	0	0	0	0	0	0	0	0	0	0	0	0	0	0	0	0	0	0	0	0	0	0	0	0	0	0	0	0	0
Bacteria	Firmicutes	Clostridia	Clostridiales	Lachnospiraceae	Sellimonas		2|1239|186801|186802|186803|1769710	0	0	0	0	0	0	0	0	0	0	0	0	0	0	0	0	0	0	0	0	0	0	0	0	0	0	0	0	0	0	0	0	0	0	0	0	0	0	0	0	0	0
Bacteria	Firmicutes	Clostridia	Clostridiales	Lachnospiraceae	Sellimonas	Sellimonas_intestinalis	2|1239|186801|186802|186803|1769710|1653434	0	0	0	0	0	0	0	0	0	0	0	0	0	0	0	0	0	0	0	0	0	0	0	0	0	0	0	0	0	0	0	0	0	0	0	0	0	0	0	0	0	0
Bacteria	Firmicutes	Clostridia	Clostridiales	Lachnospiraceae	Tyzzerella		2|1239|186801|186802|186803|1506577	0.63827	0.63827	0.19668	0.10368	0.21779	0.00162	0	0	0.03649	0	0	0	0	0	0	0	0	0	0	0	0	0	0	0	0.00119	0	0.26087	0	0.05307	0.00048	0	0	0	0	0	0	0	0	0	0	0	0
Bacteria	Firmicutes	Clostridia	Clostridiales	Lachnospiraceae	Tyzzerella	Tyzzerella_sp_An114	2|1239|186801|186802|186803|1506577|1965545	0.63827	0.63827	0.19668	0.10368	0.21779	0.00162	0	0	0.03649	0	0	0	0	0	0	0	0	0	0	0	0	0	0	0	0.00119	0	0.26087	0	0.05307	0.00048	0	0	0	0	0	0	0	0	0	0	0	0
Bacteria	Firmicutes	Clostridia	Clostridiales	Oscillospiraceae			2|1239|186801|186802|216572	0	0	0	0	0	0	0	0	0	0	0	0	0	0	0	0	0	0	0	0	0	0	0	0	0	0	0	0	0	0	0	0	0	0	0	0	0	0	0	0	0	0
Bacteria	Firmicutes	Clostridia	Clostridiales	Oscillospiraceae	Oscillibacter		2|1239|186801|186802|216572|459786	0	0	0	0	0	0	0	0	0	0	0	0	0	0	0	0	0	0	0	0	0	0	0	0	0	0	0	0	0	0	0	0	0	0	0	0	0	0	0	0	0	0
Bacteria	Firmicutes	Clostridia	Clostridiales	Oscillospiraceae	Oscillibacter	Oscillibacter_sp_57_20	2|1239|186801|186802|216572|459786|1897011	0	0	0	0	0	0	0	0	0	0	0	0	0	0	0	0	0	0	0	0	0	0	0	0	0	0	0	0	0	0	0	0	0	0	0	0	0	0	0	0	0	0
Bacteria	Firmicutes	Clostridia	Clostridiales	Peptostreptococcaceae			2|1239|186801|186802|186804	0	0	0	0	0	0	0	0	0	0	0	0	0	0	0	0.05319	0	0	0	0	0	0	0	0	0	0	0	0	0	0	0	0	0	0	0	0	0	0	0	0	0	0
Bacteria	Firmicutes	Clostridia	Clostridiales	Peptostreptococcaceae	Acetoanaerobium		2|1239|186801|186802|186804|186831	0	0	0	0	0	0	0	0	0	0	0	0	0	0	0	0.05319	0	0	0	0	0	0	0	0	0	0	0	0	0	0	0	0	0	0	0	0	0	0	0	0	0	0
Bacteria	Firmicutes	Clostridia	Clostridiales	Peptostreptococcaceae	Acetoanaerobium	Acetoanaerobium_noterae	2|1239|186801|186802|186804|186831|745369	0	0	0	0	0	0	0	0	0	0	0	0	0	0	0	0.04896	0	0	0	0	0	0	0	0	0	0	0	0	0	0	0	0	0	0	0	0	0	0	0	0	0	0
Bacteria	Firmicutes	Clostridia	Clostridiales	Peptostreptococcaceae	Acetoanaerobium	Acetoanaerobium_sticklandii	2|1239|186801|186802|186804|186831|1511	0	0	0	0	0	0	0	0	0	0	0	0	0	0	0	0.00424	0	0	0	0	0	0	0	0	0	0	0	0	0	0	0	0	0	0	0	0	0	0	0	0	0	0
Bacteria	Firmicutes	Clostridia	Clostridiales	Peptostreptococcaceae	Clostridioides		2|1239|186801|186802|186804|1870884	0	0	0	0	0	0	0	0	0	0	0	0	0	0	0	0	0	0	0	0	0	0	0	0	0	0	0	0	0	0	0	0	0	0	0	0	0	0	0	0	0	0
Bacteria	Firmicutes	Clostridia	Clostridiales	Peptostreptococcaceae	Clostridioides	Clostridioides_difficile	2|1239|186801|186802|186804|1870884|1496	0	0	0	0	0	0	0	0	0	0	0	0	0	0	0	0	0	0	0	0	0	0	0	0	0	0	0	0	0	0	0	0	0	0	0	0	0	0	0	0	0	0
Bacteria	Firmicutes	Clostridia	Clostridiales	Peptostreptococcaceae	Paraclostridium		2|1239|186801|186802|186804|1849822	0	0	0	0	0	0	0	0	0	0	0	0	0	0	0	0	0	0	0	0	0	0	0	0	0	0	0	0	0	0	0	0	0	0	0	0	0	0	0	0	0	0
Bacteria	Firmicutes	Clostridia	Clostridiales	Peptostreptococcaceae	Paraclostridium	Paraclostridium_benzoelyticum	2|1239|186801|186802|186804|1849822|1629550	0	0	0	0	0	0	0	0	0	0	0	0	0	0	0	0	0	0	0	0	0	0	0	0	0	0	0	0	0	0	0	0	0	0	0	0	0	0	0	0	0	0
Bacteria	Firmicutes	Clostridia	Clostridiales	Peptostreptococcaceae	Paraclostridium	Paraclostridium_bifermentans	2|1239|186801|186802|186804|1849822|1490	0	0	0	0	0	0	0	0	0	0	0	0	0	0	0	0	0	0	0	0	0	0	0	0	0	0	0	0	0	0	0	0	0	0	0	0	0	0	0	0	0	0
Bacteria	Firmicutes	Clostridia	Clostridiales	Peptostreptococcaceae	Romboutsia		2|1239|186801|186802|186804|1501226	0	0	0	0	0	0	0	0	0	0	0	0	0	0	0	0	0	0	0	0	0	0	0	0	0	0	0	0	0	0	0	0	0	0	0	0	0	0	0	0	0	0
Bacteria	Firmicutes	Clostridia	Clostridiales	Peptostreptococcaceae	Romboutsia	Romboutsia_ilealis	2|1239|186801|186802|186804|1501226|1115758	0	0	0	0	0	0	0	0	0	0	0	0	0	0	0	0	0	0	0	0	0	0	0	0	0	0	0	0	0	0	0	0	0	0	0	0	0	0	0	0	0	0
Bacteria	Firmicutes	Clostridia	Clostridiales	Peptostreptococcaceae	Terrisporobacter		2|1239|186801|186802|186804|1505652	0	0	0	0	0	0	0	0	0	0	0	0	0	0	0	0	0	0	0	0	0	0	0	0	0	0	0	0	0	0	0	0	0	0	0	0	0	0	0	0	0	0
Bacteria	Firmicutes	Clostridia	Clostridiales	Peptostreptococcaceae	Terrisporobacter	Terrisporobacter_othiniensis	2|1239|186801|186802|186804|1505652|1577792	0	0	0	0	0	0	0	0	0	0	0	0	0	0	0	0	0	0	0	0	0	0	0	0	0	0	0	0	0	0	0	0	0	0	0	0	0	0	0	0	0	0
Bacteria	Firmicutes	Clostridia	Clostridiales	Ruminococcaceae			2|1239|186801|186802|541000	9.41815	9.41815	7.07974	6.49218	6.85852	3.34595	4.51968	3.32251	5.23085	4.87632	0	0	0	0	0	0	0	0	0	0	0	0	0	0	0.2576	0.09847	1.36761	1.20748	0.20358	0	0.07104	0	0.23672	0	0	0.00295	0.80617	0.00427	0.46343	0	0	0
Bacteria	Firmicutes	Clostridia	Clostridiales	Ruminococcaceae	Agathobaculum		2|1239|186801|186802|541000|2048137	0	0	0	0	0	0	0	0	0	0	0	0	0	0	0	0	0	0	0	0	0	0	0	0	0	0	0	0	0	0	0	0	0	0	0	0	0	0	0	0	0	0
Bacteria	Firmicutes	Clostridia	Clostridiales	Ruminococcaceae	Agathobaculum	Agathobaculum_butyriciproducens	2|1239|186801|186802|541000|2048137|1628085	0	0	0	0	0	0	0	0	0	0	0	0	0	0	0	0	0	0	0	0	0	0	0	0	0	0	0	0	0	0	0	0	0	0	0	0	0	0	0	0	0	0
Bacteria	Firmicutes	Clostridia	Clostridiales	Ruminococcaceae	Anaerofilum		2|1239|186801|186802|541000|52784	0.45222	0.45222	0.27595	0.1671	0.23731	0.19601	0.3312	0.25185	0.51978	0.362	0	0	0	0	0	0	0	0	0	0	0	0	0	0	0.00644	0.00585	0.00894	0.07686	0.01225	0	0.00544	0	0.07582	0	0	0	0.02336	0	0.00431	0	0	0
Bacteria	Firmicutes	Clostridia	Clostridiales	Ruminococcaceae	Anaerofilum	Anaerofilum_sp_An201	2|1239|186801|186802|541000|52784|1965588	0.45222	0.45222	0.27595	0.1671	0.23731	0.19601	0.3312	0.25185	0.51978	0.362	0	0	0	0	0	0	0	0	0	0	0	0	0	0	0.00644	0.00585	0.00894	0.07686	0.01225	0	0.00544	0	0.07582	0	0	0	0.02336	0	0.00431	0	0	0
Bacteria	Firmicutes	Clostridia	Clostridiales	Ruminococcaceae	Anaeromassilibacillus		2|1239|186801|186802|541000|1924093	4.05007	4.05007	2.44076	1.50472	1.61098	1.08195	1.28295	0.99902	1.38004	1.33111	0	0	0	0	0	0	0	0	0	0	0	0	0	0	0.14057	0.04992	0.37152	0.43678	0.06147	0	0.0306	0	0.03864	0	0	0.00295	0.28856	0.00427	0.17077	0	0	0
Bacteria	Firmicutes	Clostridia	Clostridiales	Ruminococcaceae	Anaeromassilibacillus	Anaeromassilibacillus_sp_An172	2|1239|186801|186802|541000|1924093|1965570	2.47885	2.47885	1.37908	0.2691	0.55487	0.43415	0.58359	0.34819	0.43263	0.54397	0	0	0	0	0	0	0	0	0	0	0	0	0	0	0.02803	0.01981	0.01714	0.18561	0.02918	0	0.0171	0	0.00993	0	0	0	0.15854	0.00427	0.0905	0	0	0
Bacteria	Firmicutes	Clostridia	Clostridiales	Ruminococcaceae	Anaeromassilibacillus	Anaeromassilibacillus_sp_An200	2|1239|186801|186802|541000|1924093|1965587	0.25699	0.25699	0.14165	0.15174	0.18991	0.27987	0.27892	0.28377	0.51335	0.33742	0	0	0	0	0	0	0	0	0	0	0	0	0	0	0.00814	0	0.00118	0.00753	0	0	0	0	0.01233	0	0	0	0.0102	0	0.01872	0	0	0
Bacteria	Firmicutes	Clostridia	Clostridiales	Ruminococcaceae	Anaeromassilibacillus	Anaeromassilibacillus_sp_An250	2|1239|186801|186802|541000|1924093|1965604	1.31423	1.31423	0.92003	1.08388	0.86619	0.36793	0.42044	0.36706	0.43406	0.44972	0	0	0	0	0	0	0	0	0	0	0	0	0	0	0.1044	0.03011	0.3532	0.24364	0.03229	0	0.0135	0	0.01638	0	0	0.00295	0.11982	0	0.06155	0	0	0
Bacteria	Firmicutes	Clostridia	Clostridiales	Ruminococcaceae	Anaerotruncus		2|1239|186801|186802|541000|244127	0.07358	0.07358	0.02988	0.01299	0.03747	0.19772	0.20227	0.20065	0.35237	0.15013	0	0	0	0	0	0	0	0	0	0	0	0	0	0	0	0	0	0.00092	0	0	0	0	0	0	0	0	0.00519	0	0.02755	0	0	0
Bacteria	Firmicutes	Clostridia	Clostridiales	Ruminococcaceae	Anaerotruncus	Anaerotruncus_colihominis	2|1239|186801|186802|541000|244127|169435	0.07358	0.07358	0.02988	0.01299	0.03747	0.19772	0.20227	0.20065	0.35237	0.15013	0	0	0	0	0	0	0	0	0	0	0	0	0	0	0	0	0	0.00092	0	0	0	0	0	0	0	0	0.00519	0	0.02755	0	0	0
Bacteria	Firmicutes	Clostridia	Clostridiales	Ruminococcaceae	Faecalibacterium		2|1239|186801|186802|541000|216851	0	0	0	0	0	0	0	0	0	0	0	0	0	0	0	0	0	0	0	0	0	0	0	0	0	0	0	0	0	0	0	0	0	0	0	0	0	0	0	0	0	0
Bacteria	Firmicutes	Clostridia	Clostridiales	Ruminococcaceae	Faecalibacterium	Faecalibacterium_prausnitzii	2|1239|186801|186802|541000|216851|853	0	0	0	0	0	0	0	0	0	0	0	0	0	0	0	0	0	0	0	0	0	0	0	0	0	0	0	0	0	0	0	0	0	0	0	0	0	0	0	0	0	0
Bacteria	Firmicutes	Clostridia	Clostridiales	Ruminococcaceae	Flavonifractor		2|1239|186801|186802|541000|946234	1.40977	1.40977	1.11621	1.21957	1.36208	0.44933	0.57175	0.49097	0.89434	0.70386	0	0	0	0	0	0	0	0	0	0	0	0	0	0	0.03977	0.0039	0.17771	0.11649	0.02	0	0.00313	0	0.00208	0	0	0	0.28186	0	0.07519	0	0	0
Bacteria	Firmicutes	Clostridia	Clostridiales	Ruminococcaceae	Flavonifractor	Flavonifractor_plautii	2|1239|186801|186802|541000|946234|292800	0	0	0	0	0	0	0	0	0	0	0	0	0	0	0	0	0	0	0	0	0	0	0	0	0	0	0	0	0	0	0	0	0	0	0	0	0	0	0	0	0	0
Bacteria	Firmicutes	Clostridia	Clostridiales	Ruminococcaceae	Flavonifractor	Flavonifractor_sp_An10	2|1239|186801|186802|541000|946234|1965537	1.09702	1.09702	0.94809	1.08482	1.22563	0.35338	0.48624	0.37008	0.71763	0.58491	0	0	0	0	0	0	0	0	0	0	0	0	0	0	0.03643	0.0039	0.11066	0.08325	0.01702	0	0.00313	0	0.0019	0	0	0	0.28026	0	0.04797	0	0	0
Bacteria	Firmicutes	Clostridia	Clostridiales	Ruminococcaceae	Flavonifractor	Flavonifractor_sp_An100	2|1239|186801|186802|541000|946234|1965538	0.00514	0.00514	0.00761	0.02384	0.01578	0	0	0	0	0	0	0	0	0	0	0	0	0	0	0	0	0	0	0	0	0	0	0.00026	0.00056	0	0	0	0	0	0	0	0	0	0	0	0	0
Bacteria	Firmicutes	Clostridia	Clostridiales	Ruminococcaceae	Flavonifractor	Flavonifractor_sp_An306	2|1239|186801|186802|541000|946234|1965629	0.30761	0.30761	0.15616	0.10516	0.11551	0.0948	0.08552	0.12061	0.17637	0.11775	0	0	0	0	0	0	0	0	0	0	0	0	0	0	0.00334	0	0.06704	0.03298	0.00242	0	0	0	0.00018	0	0	0	0.0016	0	0.02721	0	0	0
Bacteria	Firmicutes	Clostridia	Clostridiales	Ruminococcaceae	Flavonifractor	Flavonifractor_sp_An82	2|1239|186801|186802|541000|946234|1965660	0	0	0.00436	0.00576	0.00515	0.00116	0	0.00028	0.00034	0.0012	0	0	0	0	0	0	0	0	0	0	0	0	0	0	0	0	0	0	0	0	0	0	0	0	0	0	0	0	0	0	0	0
Bacteria	Firmicutes	Clostridia	Clostridiales	Ruminococcaceae	Gemmiger		2|1239|186801|186802|541000|204475	0.97966	0.97966	0.60492	0.95411	0.60419	0.61754	1.14253	0.56887	0.61256	1.226	0	0	0	0	0	0	0	0	0	0	0	0	0	0	0.0124	0.02929	0.4073	0.251	0.03434	0	0.00848	0	0.09938	0	0	0	0.15788	0	0.16005	0	0	0
Bacteria	Firmicutes	Clostridia	Clostridiales	Ruminococcaceae	Gemmiger	Gemmiger_formicilis	2|1239|186801|186802|541000|204475|745368	0	0	0	0	0	0	0	0	0	0	0	0	0	0	0	0	0	0	0	0	0	0	0	0	0	0	0	0	0	0	0	0	0	0	0	0	0	0	0	0	0	0
Bacteria	Firmicutes	Clostridia	Clostridiales	Ruminococcaceae	Gemmiger	Gemmiger_sp_An120	2|1239|186801|186802|541000|204475|1965549	0.17992	0.17992	0.17808	0.0229	0.23362	0.31162	0.69723	0.32079	0.34764	0.73321	0	0	0	0	0	0	0	0	0	0	0	0	0	0	0	0	0.03469	0.00132	0.00099	0	0	0	0.09816	0	0	0	0.08249	0	0.15218	0	0	0
Bacteria	Firmicutes	Clostridia	Clostridiales	Ruminococcaceae	Gemmiger	Gemmiger_sp_An194	2|1239|186801|186802|541000|204475|1965582	0.00648	0.00648	0.00762	0.00943	0.00218	0.00281	0.00384	0.00194	0.00352	0.0048	0	0	0	0	0	0	0	0	0	0	0	0	0	0	0	0	0.00113	0.0003	0	0	0	0	0	0	0	0	0	0	0	0	0	0
Bacteria	Firmicutes	Clostridia	Clostridiales	Ruminococcaceae	Gemmiger	Gemmiger_sp_An50	2|1239|186801|186802|541000|204475|1965639	0.76784	0.76784	0.39727	0.90614	0.35666	0.29517	0.43055	0.2421	0.25675	0.48069	0	0	0	0	0	0	0	0	0	0	0	0	0	0	0.0124	0.02929	0.36658	0.24828	0.03259	0	0.00848	0	0.00121	0	0	0	0.07329	0	0.00787	0	0	0
Bacteria	Firmicutes	Clostridia	Clostridiales	Ruminococcaceae	Gemmiger	Gemmiger_sp_An87	2|1239|186801|186802|541000|204475|1965662	0.02542	0.02542	0.02195	0.01563	0.01173	0.00794	0.01091	0.00404	0.00466	0.0073	0	0	0	0	0	0	0	0	0	0	0	0	0	0	0	0	0.0049	0.0011	0.00076	0	0	0	0	0	0	0	0.0021	0	0	0	0	0
Bacteria	Firmicutes	Clostridia	Clostridiales	Ruminococcaceae	Pseudoflavonifractor		2|1239|186801|186802|541000|1017280	2.44116	2.44116	2.60708	2.62742	2.99601	0.79684	0.98067	0.79848	1.46318	1.09239	0	0	0	0	0	0	0	0	0	0	0	0	0	0	0.05842	0.00951	0.40215	0.32425	0.07552	0	0.02339	0	0.0208	0	0	0	0.04932	0	0.02516	0	0	0
Bacteria	Firmicutes	Clostridia	Clostridiales	Ruminococcaceae	Pseudoflavonifractor	Pseudoflavonifractor_capillosus	2|1239|186801|186802|541000|1017280|106588	0.19899	0.19899	0.21322	0.07758	0.2091	0.01788	0.04142	0.01931	0.05879	0.03641	0	0	0	0	0	0	0	0	0	0	0	0	0	0	0.00515	0.00221	0.09473	0.04785	0.01512	0	0	0	0.01175	0	0	0	0.00106	0	0	0	0	0
Bacteria	Firmicutes	Clostridia	Clostridiales	Ruminococcaceae	Pseudoflavonifractor	Pseudoflavonifractor_sp_An184	2|1239|186801|186802|541000|1017280|1965576	2.21432	2.21432	2.28063	2.47234	2.71578	0.75856	0.91983	0.75466	1.37813	1.03327	0	0	0	0	0	0	0	0	0	0	0	0	0	0	0.05221	0.0073	0.29991	0.27391	0.06017	0	0.02339	0	0.00905	0	0	0	0.04826	0	0.02516	0	0	0
Bacteria	Firmicutes	Clostridia	Clostridiales	Ruminococcaceae	Pseudoflavonifractor	Pseudoflavonifractor_sp_An85	2|1239|186801|186802|541000|1017280|1965661	0.02785	0.02785	0.11323	0.0775	0.07114	0.0204	0.01942	0.02451	0.02626	0.02271	0	0	0	0	0	0	0	0	0	0	0	0	0	0	0.00107	0	0.00751	0.0025	0.00023	0	0	0	0	0	0	0	0	0	0	0	0	0
Bacteria	Firmicutes	Clostridia	Clostridiales	Ruminococcaceae	Ruminococcaceae_unclassified			0.00549	0.00549	0.0013	0.00419	0.00199	0.00099	0.00276	0.00082	0.00141	0.00183	0	0	0	0	0	0	0	0	0	0	0	0	0	0	0	0	0	0	0	0	0	0	0	0	0	0	0	0	0	0	0	0
Bacteria	Firmicutes	Clostridia	Clostridiales	Ruminococcaceae	Ruminococcaceae_unclassified		2|1239|186801|186802|541000|	0	0	0	0	0	0	0	0	0	0	0	0	0	0	0	0	0	0	0	0	0	0	0	0	0	0	0	0	0	0	0	0	0	0	0	0	0	0	0	0	0	0
Bacteria	Firmicutes	Clostridia	Clostridiales	Ruminococcaceae	Ruminococcaceae_unclassified	Clostridium_leptum	2|1239|186801|186802|541000||1535	0	0	0	0	0	0	0	0	0	0	0	0	0	0	0	0	0	0	0	0	0	0	0	0	0	0	0	0	0	0	0	0	0	0	0	0	0	0	0	0	0	0
Bacteria	Firmicutes	Clostridia	Clostridiales	Ruminococcaceae	Ruminococcaceae_unclassified	Clostridium_methylpentosum	2|1239|186801|186802|541000||84026	0	0	0	0	0	0	0	0	0	0	0	0	0	0	0	0	0	0	0	0	0	0	0	0	0	0	0	0	0	0	0	0	0	0	0	0	0	0	0	0	0	0
Bacteria	Firmicutes	Clostridia	Clostridiales	Ruminococcaceae	Ruminococcaceae_unclassified	Ruminococcaceae_bacterium_D16	2|1239|186801|186802|541000||552398	0.00549	0.00549	0.0013	0.00419	0.00199	0.00099	0.00276	0.00082	0.00141	0.00183	0	0	0	0	0	0	0	0	0	0	0	0	0	0	0	0	0	0	0	0	0	0	0	0	0	0	0	0	0	0	0	0
Bacteria	Firmicutes	Clostridia	Clostridiales	Ruminococcaceae	Ruminococcus		2|1239|186801|186802|541000|1263	0	0	0	0	0	0	0	0	0	0	0	0	0	0	0	0	0	0	0	0	0	0	0	0	0	0	0	0	0	0	0	0	0	0	0	0	0	0	0	0	0	0
Bacteria	Firmicutes	Clostridia	Clostridiales	Ruminococcaceae	Ruminococcus	Ruminococcus_bicirculans	2|1239|186801|186802|541000|1263|1160721	0	0	0	0	0	0	0	0	0	0	0	0	0	0	0	0	0	0	0	0	0	0	0	0	0	0	0	0	0	0	0	0	0	0	0	0	0	0	0	0	0	0
Bacteria	Firmicutes	Clostridia	Clostridiales	Ruminococcaceae	Ruminococcus	Ruminococcus_bromii	2|1239|186801|186802|541000|1263|40518	0	0	0	0	0	0	0	0	0	0	0	0	0	0	0	0	0	0	0	0	0	0	0	0	0	0	0	0	0	0	0	0	0	0	0	0	0	0	0	0	0	0
Bacteria	Firmicutes	Clostridia	Clostridiales	Ruminococcaceae	Ruminococcus	Ruminococcus_lactaris	2|1239|186801|186802|541000|1263|46228	0	0	0	0	0	0	0	0	0	0	0	0	0	0	0	0	0	0	0	0	0	0	0	0	0	0	0	0	0	0	0	0	0	0	0	0	0	0	0	0	0	0
Bacteria	Firmicutes	Clostridia	Clostridiales	Ruminococcaceae	Ruminococcus	Ruminococcus_obeum_CAG_39	2|1239|186801|186802|541000|1263|1263107	0	0	0	0	0	0	0	0	0	0	0	0	0	0	0	0	0	0	0	0	0	0	0	0	0	0	0	0	0	0	0	0	0	0	0	0	0	0	0	0	0	0
Bacteria	Firmicutes	Clostridia	Clostridiales	Ruminococcaceae	Ruthenibacterium		2|1239|186801|186802|541000|1905344	0	0	0	0	0	0	0	0	0	0	0	0	0	0	0	0	0	0	0	0	0	0	0	0	0	0	0	0	0	0	0	0	0	0	0	0	0	0	0	0	0	0
Bacteria	Firmicutes	Clostridia	Clostridiales	Ruminococcaceae	Ruthenibacterium	Ruthenibacterium_lactatiformans	2|1239|186801|186802|541000|1905344|1550024	0	0	0	0	0	0	0	0	0	0	0	0	0	0	0	0	0	0	0	0	0	0	0	0	0	0	0	0	0	0	0	0	0	0	0	0	0	0	0	0	0	0
Bacteria	Firmicutes	Clostridia	Clostridiales	Ruminococcaceae	Subdoligranulum		2|1239|186801|186802|541000|292632	0.00621	0.00621	0.00364	0.00209	0.00849	0.00557	0.00554	0.01185	0.00716	0.00901	0	0	0	0	0	0	0	0	0	0	0	0	0	0	0	0	0	0.00119	0	0	0	0	0	0	0	0	0	0	0.00041	0	0	0
Bacteria	Firmicutes	Clostridia	Clostridiales	Ruminococcaceae	Subdoligranulum	Subdoligranulum_variabile	2|1239|186801|186802|541000|292632|214851	0.00621	0.00621	0.00364	0.00209	0.00849	0.00557	0.00554	0.01185	0.00716	0.00901	0	0	0	0	0	0	0	0	0	0	0	0	0	0	0	0	0	0.00119	0	0	0	0	0	0	0	0	0	0	0.00041	0	0	0
Bacteria	Firmicutes	Erysipelotrichia					2|1239|526524	2.16838	2.16838	0.93622	0.7693	0.69654	1.01097	1.18748	0.7599	0.89907	1.26985	0	0	0	0.12041	0	0.82476	0	0	0	0	0	0	0	0	0.25264	2.51102	4.59284	0.24536	0.03805	2.58634	1.65098	0.79982	1.68446	1.05106	1.17842	4.37054	0.15436	5.94777	0.54667	0	0	0
Bacteria	Firmicutes	Erysipelotrichia	Erysipelotrichales				2|1239|526524|526525	2.16838	2.16838	0.93622	0.7693	0.69654	1.01097	1.18748	0.7599	0.89907	1.26985	0	0	0	0.12041	0	0.82476	0	0	0	0	0	0	0	0	0.25264	2.51102	4.59284	0.24536	0.03805	2.58634	1.65098	0.79982	1.68446	1.05106	1.17842	4.37054	0.15436	5.94777	0.54667	0	0	0
Bacteria	Firmicutes	Erysipelotrichia	Erysipelotrichales	Erysipelotrichaceae			2|1239|526524|526525|128827	2.16838	2.16838	0.93622	0.7693	0.69654	1.01097	1.18748	0.7599	0.89907	1.26985	0	0	0	0.12041	0	0.82476	0	0	0	0	0	0	0	0	0.25264	2.51102	4.59284	0.24536	0.03805	2.58634	1.65098	0.79982	1.68446	1.05106	1.17842	4.37054	0.15436	5.94777	0.54667	0	0	0
Bacteria	Firmicutes	Erysipelotrichia	Erysipelotrichales	Erysipelotrichaceae	Catenibacterium		2|1239|526524|526525|128827|135858	0	0	0	0	0	0	0	0	0	0	0	0	0	0	0	0	0	0	0	0	0	0	0	0	0	0	0	0	0	0	0	0	0	0	0	0	0	0	0	0	0	0
Bacteria	Firmicutes	Erysipelotrichia	Erysipelotrichales	Erysipelotrichaceae	Catenibacterium	Catenibacterium_mitsuokai	2|1239|526524|526525|128827|135858|100886	0	0	0	0	0	0	0	0	0	0	0	0	0	0	0	0	0	0	0	0	0	0	0	0	0	0	0	0	0	0	0	0	0	0	0	0	0	0	0	0	0	0
Bacteria	Firmicutes	Erysipelotrichia	Erysipelotrichales	Erysipelotrichaceae	Erysipelatoclostridium		2|1239|526524|526525|128827|1505663	2.14451	2.14451	0.82299	0.74529	0.58877	0.71615	0.86721	0.55684	0.82284	1.04923	0	0	0	0	0	0	0	0	0	0	0	0	0	0	0.01471	0.0576	0.08631	0.20067	0.01237	0.00212	0.02717	0.00142	0.14211	0.00603	0	0.01489	0.08342	0.02046	0.0367	0	0	0
Bacteria	Firmicutes	Erysipelotrichia	Erysipelotrichales	Erysipelotrichaceae	Erysipelatoclostridium	Clostridium_innocuum	2|1239|526524|526525|128827|1505663|1522	0	0	0	0	0	0	0	0	0	0	0	0	0	0	0	0	0	0	0	0	0	0	0	0	0	0	0	0	0	0	0	0	0	0	0	0	0	0	0	0	0	0
Bacteria	Firmicutes	Erysipelotrichia	Erysipelotrichales	Erysipelotrichaceae	Erysipelatoclostridium	Clostridium_spiroforme	2|1239|526524|526525|128827|1505663|29348	2.14451	2.14451	0.82299	0.74529	0.58877	0.71615	0.86721	0.55684	0.82284	1.04923	0	0	0	0	0	0	0	0	0	0	0	0	0	0	0.01471	0.0576	0.08631	0.20067	0.01237	0.00212	0.02717	0.00142	0.14211	0.00603	0	0.01489	0.08342	0.02046	0.0367	0	0	0
Bacteria	Firmicutes	Erysipelotrichia	Erysipelotrichales	Erysipelotrichaceae	Erysipelatoclostridium	Erysipelatoclostridium_ramosum	2|1239|526524|526525|128827|1505663|1547	0	0	0	0	0	0	0	0	0	0	0	0	0	0	0	0	0	0	0	0	0	0	0	0	0	0	0	0	0	0	0	0	0	0	0	0	0	0	0	0	0	0
Bacteria	Firmicutes	Erysipelotrichia	Erysipelotrichales	Erysipelotrichaceae	Erysipelothrix		2|1239|526524|526525|128827|1647	0.00427	0.00427	0.08994	0.01355	0.07613	0.2798	0.30324	0.19561	0.0617	0.20406	0	0	0	0.12041	0	0.82476	0	0	0	0	0	0	0	0	0.23793	2.43436	4.50653	0.0447	0.02568	2.57982	1.62267	0.79231	1.54116	1.04503	1.17842	4.35565	0.06948	5.9273	0.50997	0	0	0
Bacteria	Firmicutes	Erysipelotrichia	Erysipelotrichales	Erysipelotrichaceae	Erysipelothrix	Erysipelothrix_larvae	2|1239|526524|526525|128827|1647|1514105	0.00427	0.00427	0.08994	0.01355	0.07613	0.2798	0.30324	0.19561	0.0617	0.20406	0	0	0	0.12041	0	0.82476	0	0	0	0	0	0	0	0	0.23793	2.43436	4.50653	0.0447	0.02568	2.57982	1.62267	0.79231	1.54116	1.04503	1.17842	4.35565	0.06948	5.9273	0.50997	0	0	0
Bacteria	Firmicutes	Erysipelotrichia	Erysipelotrichales	Erysipelotrichaceae	Erysipelotrichaceae_unclassified			0	0	0	0	0	0	0	0	0	0	0	0	0	0	0	0	0	0	0	0	0	0	0	0	0	0.01906	0	0	0	0.0044	0.00114	0.00609	0	0	0	0	0	0	0	0	0	0
Bacteria	Firmicutes	Erysipelotrichia	Erysipelotrichales	Erysipelotrichaceae	Erysipelotrichaceae_unclassified	Erysipelotrichaceae_bacterium_MTC7	2|1239|526524|526525|128827||1768196	0	0	0	0	0	0	0	0	0	0	0	0	0	0	0	0	0	0	0	0	0	0	0	0	0	0.01906	0	0	0	0.0044	0.00114	0.00609	0	0	0	0	0	0	0	0	0	0
Bacteria	Firmicutes	Erysipelotrichia	Erysipelotrichales	Erysipelotrichaceae	Massiliomicrobiota		2|1239|526524|526525|128827|1924110	0.0196	0.0196	0.0233	0.01047	0.03163	0.01502	0.01703	0.00744	0.01453	0.01656	0	0	0	0	0	0	0	0	0	0	0	0	0	0	0	0	0	0	0	0	0	0	0.0012	0	0	0	0.00146	0	0	0	0	0
Bacteria	Firmicutes	Erysipelotrichia	Erysipelotrichales	Erysipelotrichaceae	Massiliomicrobiota	Massiliomicrobiota_timonensis	2|1239|526524|526525|128827|1924110|1776392	0.0196	0.0196	0.0233	0.01047	0.03163	0.01502	0.01703	0.00744	0.01453	0.01656	0	0	0	0	0	0	0	0	0	0	0	0	0	0	0	0	0	0	0	0	0	0	0.0012	0	0	0	0.00146	0	0	0	0	0
Bacteria	Firmicutes	Erysipelotrichia	Erysipelotrichales	Erysipelotrichaceae	Turicibacter		2|1239|526524|526525|128827|191303	0	0	0	0	0	0	0	0	0	0	0	0	0	0	0	0	0	0	0	0	0	0	0	0	0	0	0	0	0	0	0	0	0	0	0	0	0	0	0	0	0	0
Bacteria	Firmicutes	Erysipelotrichia	Erysipelotrichales	Erysipelotrichaceae	Turicibacter	Turicibacter_sanguinis	2|1239|526524|526525|128827|191303|154288	0	0	0	0	0	0	0	0	0	0	0	0	0	0	0	0	0	0	0	0	0	0	0	0	0	0	0	0	0	0	0	0	0	0	0	0	0	0	0	0	0	0
Bacteria	Firmicutes	Firmicutes_unclassified						4.414	4.414	3.26577	2.62383	3.25526	1.01957	1.16446	1.0329	1.81741	1.11047	0	0	0	0	0	0	0	0	0	0	0	0	0	0	0.18225	0.10068	0.7225	0.78035	0.31672	0	0.03476	0	0.11416	0	0	0.00038	0.10041	0.01053	0.10644	0	0	0
Bacteria	Firmicutes	Firmicutes_unclassified					2|1239|	0	0	0	0	0	0	0	0	0	0	0	0	0	0	0	0	0	0	0	0	0	0	0	0	0	0	0	0	0	0	0	0	0	0	0	0	0	0	0	0	0	0
Bacteria	Firmicutes	Firmicutes_unclassified	Firmicutes_unclassified					4.414	4.414	3.26577	2.62383	3.25526	1.01957	1.16446	1.0329	1.81741	1.11047	0	0	0	0	0	0	0	0	0	0	0	0	0	0	0.18225	0.10068	0.7225	0.78035	0.31672	0	0.03476	0	0.11416	0	0	0.00038	0.10041	0.01053	0.10644	0	0	0
Bacteria	Firmicutes	Firmicutes_unclassified	Firmicutes_unclassified				2|1239||	0	0	0	0	0	0	0	0	0	0	0	0	0	0	0	0	0	0	0	0	0	0	0	0	0	0	0	0	0	0	0	0	0	0	0	0	0	0	0	0	0	0
Bacteria	Firmicutes	Firmicutes_unclassified	Firmicutes_unclassified	Firmicutes_unclassified				4.414	4.414	3.26577	2.62383	3.25526	1.01957	1.16446	1.0329	1.81741	1.11047	0	0	0	0	0	0	0	0	0	0	0	0	0	0	0.18225	0.10068	0.7225	0.78035	0.31672	0	0.03476	0	0.11416	0	0	0.00038	0.10041	0.01053	0.10644	0	0	0
Bacteria	Firmicutes	Firmicutes_unclassified	Firmicutes_unclassified	Firmicutes_unclassified			2|1239|||	0	0	0	0	0	0	0	0	0	0	0	0	0	0	0	0	0	0	0	0	0	0	0	0	0	0	0	0	0	0	0	0	0	0	0	0	0	0	0	0	0	0
Bacteria	Firmicutes	Firmicutes_unclassified	Firmicutes_unclassified	Firmicutes_unclassified	Firmicutes_unclassified			4.414	4.414	3.26577	2.62383	3.25526	1.01957	1.16446	1.0329	1.81741	1.11047	0	0	0	0	0	0	0	0	0	0	0	0	0	0	0.18225	0.10068	0.7225	0.78035	0.31672	0	0.03476	0	0.11416	0	0	0.00038	0.10041	0.01053	0.10644	0	0	0
Bacteria	Firmicutes	Firmicutes_unclassified	Firmicutes_unclassified	Firmicutes_unclassified	Firmicutes_unclassified		2|1239||||	0	0	0	0	0	0	0	0	0	0	0	0	0	0	0	0	0	0	0	0	0	0	0	0	0	0	0	0	0	0	0	0	0	0	0	0	0	0	0	0	0	0
Bacteria	Firmicutes	Firmicutes_unclassified	Firmicutes_unclassified	Firmicutes_unclassified	Firmicutes_unclassified	Firmicutes_bacterium_CAG_83	2|1239|||||1262992	0	0	0	0	0	0	0	0	0	0	0	0	0	0	0	0	0	0	0	0	0	0	0	0	0	0	0	0	0	0	0	0	0	0	0	0	0	0	0	0	0	0
Bacteria	Firmicutes	Firmicutes_unclassified	Firmicutes_unclassified	Firmicutes_unclassified	Firmicutes_unclassified	Firmicutes_bacterium_CAG_94	2|1239|||||1262989	4.414	4.414	3.26577	2.62383	3.25526	1.01957	1.16446	1.0329	1.81741	1.11047	0	0	0	0	0	0	0	0	0	0	0	0	0	0	0.18225	0.10068	0.7225	0.78035	0.31672	0	0.03476	0	0.11416	0	0	0.00038	0.10041	0.01053	0.10644	0	0	0
Bacteria	Firmicutes	Negativicutes					2|1239|909932	0.0209	0.0209	0.18976	0.03018	0.29541	0	0	0	0	0	0.26876	0	0	0	0	0	0	0	0	0	0	0	0	2.95445	0.03441	0.12693	0.05369	0	0.00247	0	0	0	0	0	0	0	0	0	0	0	0	0
Bacteria	Firmicutes	Negativicutes	Acidaminococcales				2|1239|909932|1843488	0.0209	0.0209	0.15278	0.02821	0.26889	0	0	0	0	0	0	0	0	0	0	0	0	0	0	0	0	0	0	0	0.03441	0.12693	0.05369	0	0.00247	0	0	0	0	0	0	0	0	0	0	0	0	0
Bacteria	Firmicutes	Negativicutes	Acidaminococcales	Acidaminococcaceae			2|1239|909932|1843488|909930	0.0209	0.0209	0.15278	0.02821	0.26889	0	0	0	0	0	0	0	0	0	0	0	0	0	0	0	0	0	0	0	0.03441	0.12693	0.05369	0	0.00247	0	0	0	0	0	0	0	0	0	0	0	0	0
Bacteria	Firmicutes	Negativicutes	Acidaminococcales	Acidaminococcaceae	Phascolarctobacterium		2|1239|909932|1843488|909930|33024	0.0209	0.0209	0.15278	0.02821	0.26889	0	0	0	0	0	0	0	0	0	0	0	0	0	0	0	0	0	0	0	0.03441	0.12693	0.05369	0	0.00247	0	0	0	0	0	0	0	0	0	0	0	0	0
Bacteria	Firmicutes	Negativicutes	Acidaminococcales	Acidaminococcaceae	Phascolarctobacterium	Phascolarctobacterium_faecium	2|1239|909932|1843488|909930|33024|33025	0.0209	0.0209	0.15278	0.02821	0.26889	0	0	0	0	0	0	0	0	0	0	0	0	0	0	0	0	0	0	0	0.03441	0.12693	0.05369	0	0.00247	0	0	0	0	0	0	0	0	0	0	0	0	0
Bacteria	Firmicutes	Negativicutes	Acidaminococcales	Acidaminococcaceae	Phascolarctobacterium	Phascolarctobacterium_sp_CAG_266	2|1239|909932|1843488|909930|33024|1262915	0	0	0	0	0	0	0	0	0	0	0	0	0	0	0	0	0	0	0	0	0	0	0	0	0	0	0	0	0	0	0	0	0	0	0	0	0	0	0	0	0	0
Bacteria	Firmicutes	Negativicutes	Acidaminococcales	Acidaminococcaceae	Phascolarctobacterium	Phascolarctobacterium_succinatutens	2|1239|909932|1843488|909930|33024|626940	0	0	0	0	0	0	0	0	0	0	0	0	0	0	0	0	0	0	0	0	0	0	0	0	0	0	0	0	0	0	0	0	0	0	0	0	0	0	0	0	0	0
Bacteria	Firmicutes	Negativicutes	Selenomonadales				2|1239|909932|909929	0	0	0.03698	0.00197	0.02652	0	0	0	0	0	0.26876	0	0	0	0	0	0	0	0	0	0	0	0	2.95445	0	0	0	0	0	0	0	0	0	0	0	0	0	0	0	0	0	0
Bacteria	Firmicutes	Negativicutes	Selenomonadales	Selenomonadaceae			2|1239|909932|909929|1843491	0	0	0.03698	0.00197	0.02652	0	0	0	0	0	0.26876	0	0	0	0	0	0	0	0	0	0	0	0	2.95445	0	0	0	0	0	0	0	0	0	0	0	0	0	0	0	0	0	0
Bacteria	Firmicutes	Negativicutes	Selenomonadales	Selenomonadaceae	Megamonas		2|1239|909932|909929|1843491|158846	0	0	0.03698	0.00197	0.02652	0	0	0	0	0	0.26876	0	0	0	0	0	0	0	0	0	0	0	0	2.95445	0	0	0	0	0	0	0	0	0	0	0	0	0	0	0	0	0	0
Bacteria	Firmicutes	Negativicutes	Selenomonadales	Selenomonadaceae	Megamonas	Megamonas_funiformis	2|1239|909932|909929|1843491|158846|437897	0	0	0.03698	0.00197	0.02652	0	0	0	0	0	0.04612	0	0	0	0	0	0	0	0	0	0	0	0	2.95445	0	0	0	0	0	0	0	0	0	0	0	0	0	0	0	0	0	0
Bacteria	Firmicutes	Negativicutes	Selenomonadales	Selenomonadaceae	Megamonas	Megamonas_hypermegale	2|1239|909932|909929|1843491|158846|158847	0	0	0	0	0	0	0	0	0	0	0.17578	0	0	0	0	0	0	0	0	0	0	0	0	0	0	0	0	0	0	0	0	0	0	0	0	0	0	0	0	0	0	0
Bacteria	Firmicutes	Negativicutes	Selenomonadales	Selenomonadaceae	Megamonas	Megamonas_rupellensis	2|1239|909932|909929|1843491|158846|491921	0	0	0	0	0	0	0	0	0	0	0.04687	0	0	0	0	0	0	0	0	0	0	0	0	0	0	0	0	0	0	0	0	0	0	0	0	0	0	0	0	0	0	0
Bacteria	Firmicutes	Negativicutes	Selenomonadales	Selenomonadaceae	Mitsuokella		2|1239|909932|909929|1843491|52225	0	0	0	0	0	0	0	0	0	0	0	0	0	0	0	0	0	0	0	0	0	0	0	0	0	0	0	0	0	0	0	0	0	0	0	0	0	0	0	0	0	0
Bacteria	Firmicutes	Negativicutes	Selenomonadales	Selenomonadaceae	Mitsuokella	Mitsuokella_multacida	2|1239|909932|909929|1843491|52225|52226	0	0	0	0	0	0	0	0	0	0	0	0	0	0	0	0	0	0	0	0	0	0	0	0	0	0	0	0	0	0	0	0	0	0	0	0	0	0	0	0	0	0
Bacteria	Firmicutes	Negativicutes	Veillonellales				2|1239|909932|1843489	0	0	0	0	0	0	0	0	0	0	0	0	0	0	0	0	0	0	0	0	0	0	0	0	0	0	0	0	0	0	0	0	0	0	0	0	0	0	0	0	0	0
Bacteria	Firmicutes	Negativicutes	Veillonellales	Veillonellaceae			2|1239|909932|1843489|31977	0	0	0	0	0	0	0	0	0	0	0	0	0	0	0	0	0	0	0	0	0	0	0	0	0	0	0	0	0	0	0	0	0	0	0	0	0	0	0	0	0	0
Bacteria	Firmicutes	Negativicutes	Veillonellales	Veillonellaceae	Dialister		2|1239|909932|1843489|31977|39948	0	0	0	0	0	0	0	0	0	0	0	0	0	0	0	0	0	0	0	0	0	0	0	0	0	0	0	0	0	0	0	0	0	0	0	0	0	0	0	0	0	0
Bacteria	Firmicutes	Negativicutes	Veillonellales	Veillonellaceae	Dialister	Dialister_sp_CAG_357	2|1239|909932|1843489|31977|39948|1262869	0	0	0	0	0	0	0	0	0	0	0	0	0	0	0	0	0	0	0	0	0	0	0	0	0	0	0	0	0	0	0	0	0	0	0	0	0	0	0	0	0	0
Bacteria	Firmicutes	Tissierellia					2|1239|1737404	0	0	0	0	0	0	0	0	0	0	0	0	0	0	0	0	0	0	0	0	0	0	0	0	0	0	0	0	0	0.00151	0.00107	0.00019	0	0	0	0	0	0	0	0	0	0
Bacteria	Firmicutes	Tissierellia	Tissierellales				2|1239|1737404|1737405	0	0	0	0	0	0	0	0	0	0	0	0	0	0	0	0	0	0	0	0	0	0	0	0	0	0	0	0	0	0.00151	0.00107	0.00019	0	0	0	0	0	0	0	0	0	0
Bacteria	Firmicutes	Tissierellia	Tissierellales	Gottschalkiaceae			2|1239|1737404|1737405|2042895	0	0	0	0	0	0	0	0	0	0	0	0	0	0	0	0	0	0	0	0	0	0	0	0	0	0	0	0	0	0	0	0	0	0	0	0	0	0	0	0	0	0
Bacteria	Firmicutes	Tissierellia	Tissierellales	Gottschalkiaceae	Andreesenia		2|1239|1737404|1737405|2042895|2042899	0	0	0	0	0	0	0	0	0	0	0	0	0	0	0	0	0	0	0	0	0	0	0	0	0	0	0	0	0	0	0	0	0	0	0	0	0	0	0	0	0	0
Bacteria	Firmicutes	Tissierellia	Tissierellales	Gottschalkiaceae	Andreesenia	Andreesenia_angusta	2|1239|1737404|1737405|2042895|2042899|39480	0	0	0	0	0	0	0	0	0	0	0	0	0	0	0	0	0	0	0	0	0	0	0	0	0	0	0	0	0	0	0	0	0	0	0	0	0	0	0	0	0	0
Bacteria	Firmicutes	Tissierellia	Tissierellales	Peptoniphilaceae			2|1239|1737404|1737405|1570339	0	0	0	0	0	0	0	0	0	0	0	0	0	0	0	0	0	0	0	0	0	0	0	0	0	0	0	0	0	0.00151	0.00107	0.00019	0	0	0	0	0	0	0	0	0	0
Bacteria	Firmicutes	Tissierellia	Tissierellales	Peptoniphilaceae	Anaerococcus		2|1239|1737404|1737405|1570339|165779	0	0	0	0	0	0	0	0	0	0	0	0	0	0	0	0	0	0	0	0	0	0	0	0	0	0	0	0	0	0	0	0	0	0	0	0	0	0	0	0	0	0
Bacteria	Firmicutes	Tissierellia	Tissierellales	Peptoniphilaceae	Anaerococcus	Anaerococcus_vaginalis	2|1239|1737404|1737405|1570339|165779|33037	0	0	0	0	0	0	0	0	0	0	0	0	0	0	0	0	0	0	0	0	0	0	0	0	0	0	0	0	0	0	0	0	0	0	0	0	0	0	0	0	0	0
Bacteria	Firmicutes	Tissierellia	Tissierellales	Peptoniphilaceae	Anaerosphaera		2|1239|1737404|1737405|1570339|1273095	0	0	0	0	0	0	0	0	0	0	0	0	0	0	0	0	0	0	0	0	0	0	0	0	0	0	0	0	0	0	0	0	0	0	0	0	0	0	0	0	0	0
Bacteria	Firmicutes	Tissierellia	Tissierellales	Peptoniphilaceae	Anaerosphaera	Anaerosphaera_aminiphila	2|1239|1737404|1737405|1570339|1273095|1120994	0	0	0	0	0	0	0	0	0	0	0	0	0	0	0	0	0	0	0	0	0	0	0	0	0	0	0	0	0	0	0	0	0	0	0	0	0	0	0	0	0	0
Bacteria	Firmicutes	Tissierellia	Tissierellales	Peptoniphilaceae	Finegoldia		2|1239|1737404|1737405|1570339|150022	0	0	0	0	0	0	0	0	0	0	0	0	0	0	0	0	0	0	0	0	0	0	0	0	0	0	0	0	0	0	0	0	0	0	0	0	0	0	0	0	0	0
Bacteria	Firmicutes	Tissierellia	Tissierellales	Peptoniphilaceae	Finegoldia	Finegoldia_magna	2|1239|1737404|1737405|1570339|150022|1260	0	0	0	0	0	0	0	0	0	0	0	0	0	0	0	0	0	0	0	0	0	0	0	0	0	0	0	0	0	0	0	0	0	0	0	0	0	0	0	0	0	0
Bacteria	Firmicutes	Tissierellia	Tissierellales	Peptoniphilaceae	Peptoniphilus		2|1239|1737404|1737405|1570339|162289	0	0	0	0	0	0	0	0	0	0	0	0	0	0	0	0	0	0	0	0	0	0	0	0	0	0	0	0	0	0.00151	0.00107	0.00019	0	0	0	0	0	0	0	0	0	0
Bacteria	Firmicutes	Tissierellia	Tissierellales	Peptoniphilaceae	Peptoniphilus	Peptoniphilus_harei	2|1239|1737404|1737405|1570339|162289|54005	0	0	0	0	0	0	0	0	0	0	0	0	0	0	0	0	0	0	0	0	0	0	0	0	0	0	0	0	0	0.00036	0.00107	0.00019	0	0	0	0	0	0	0	0	0	0
Bacteria	Firmicutes	Tissierellia	Tissierellales	Peptoniphilaceae	Peptoniphilus	Peptoniphilus_sp_ING2_D1G	2|1239|1737404|1737405|1570339|162289|1912856	0	0	0	0	0	0	0	0	0	0	0	0	0	0	0	0	0	0	0	0	0	0	0	0	0	0	0	0	0	0.00115	0	0	0	0	0	0	0	0	0	0	0	0
Bacteria	Fusobacteria						2|32066	0.03505	0.03505	0	0.01194	0.00907	0	0	0	0	0	0	0	0	0	0	0	0	0	0	0	0	0	0	0	0	0.0065	0	0	0	0	0	0	0.01769	0	0	0	0	0	0	0	0	0
Bacteria	Fusobacteria	Fusobacteriia					2|32066|203490	0.03505	0.03505	0	0.01194	0.00907	0	0	0	0	0	0	0	0	0	0	0	0	0	0	0	0	0	0	0	0	0.0065	0	0	0	0	0	0	0.01769	0	0	0	0	0	0	0	0	0
Bacteria	Fusobacteria	Fusobacteriia	Fusobacteriales				2|32066|203490|203491	0.03505	0.03505	0	0.01194	0.00907	0	0	0	0	0	0	0	0	0	0	0	0	0	0	0	0	0	0	0	0	0.0065	0	0	0	0	0	0	0.01769	0	0	0	0	0	0	0	0	0
Bacteria	Fusobacteria	Fusobacteriia	Fusobacteriales	Fusobacteriaceae			2|32066|203490|203491|203492	0.03505	0.03505	0	0.01194	0.00907	0	0	0	0	0	0	0	0	0	0	0	0	0	0	0	0	0	0	0	0	0.0065	0	0	0	0	0	0	0.01769	0	0	0	0	0	0	0	0	0
Bacteria	Fusobacteria	Fusobacteriia	Fusobacteriales	Fusobacteriaceae	Fusobacterium		2|32066|203490|203491|203492|848	0.03505	0.03505	0	0.01194	0.00907	0	0	0	0	0	0	0	0	0	0	0	0	0	0	0	0	0	0	0	0	0.0065	0	0	0	0	0	0	0.01769	0	0	0	0	0	0	0	0	0
Bacteria	Fusobacteria	Fusobacteriia	Fusobacteriales	Fusobacteriaceae	Fusobacterium	Fusobacterium_sp_CAG_439	2|32066|203490|203491|203492|848|1262899	0.03505	0.03505	0	0.01194	0.00907	0	0	0	0	0	0	0	0	0	0	0	0	0	0	0	0	0	0	0	0	0	0	0	0	0	0	0	0	0	0	0	0	0	0	0	0	0
Bacteria	Fusobacteria	Fusobacteriia	Fusobacteriales	Fusobacteriaceae	Fusobacterium	Fusobacterium_ulcerans	2|32066|203490|203491|203492|848|861	0	0	0	0	0	0	0	0	0	0	0	0	0	0	0	0	0	0	0	0	0	0	0	0	0	0.0065	0	0	0	0	0	0	0.01769	0	0	0	0	0	0	0	0	0
Bacteria	Gemmatimonadetes						2|142182	0	0	0	0	0	0	0	0	0	0	0	0	0	0	0	0	0	0	0	0	0	0	0	0	0	0	0	0	0	0	0	0	0	0	0	0	0	0	0	0	0	0
Bacteria	Gemmatimonadetes	Gemmatimonadetes					2|142182|219685	0	0	0	0	0	0	0	0	0	0	0	0	0	0	0	0	0	0	0	0	0	0	0	0	0	0	0	0	0	0	0	0	0	0	0	0	0	0	0	0	0	0
Bacteria	Gemmatimonadetes	Gemmatimonadetes	Gemmatimonadales				2|142182|219685|219686	0	0	0	0	0	0	0	0	0	0	0	0	0	0	0	0	0	0	0	0	0	0	0	0	0	0	0	0	0	0	0	0	0	0	0	0	0	0	0	0	0	0
Bacteria	Gemmatimonadetes	Gemmatimonadetes	Gemmatimonadales	Gemmatimonadaceae			2|142182|219685|219686|219687	0	0	0	0	0	0	0	0	0	0	0	0	0	0	0	0	0	0	0	0	0	0	0	0	0	0	0	0	0	0	0	0	0	0	0	0	0	0	0	0	0	0
Bacteria	Gemmatimonadetes	Gemmatimonadetes	Gemmatimonadales	Gemmatimonadaceae	Gemmatirosa		2|142182|219685|219686|219687|1706036	0	0	0	0	0	0	0	0	0	0	0	0	0	0	0	0	0	0	0	0	0	0	0	0	0	0	0	0	0	0	0	0	0	0	0	0	0	0	0	0	0	0
Bacteria	Gemmatimonadetes	Gemmatimonadetes	Gemmatimonadales	Gemmatimonadaceae	Gemmatirosa	Gemmatirosa_kalamazoonesis	2|142182|219685|219686|219687|1706036|861299	0	0	0	0	0	0	0	0	0	0	0	0	0	0	0	0	0	0	0	0	0	0	0	0	0	0	0	0	0	0	0	0	0	0	0	0	0	0	0	0	0	0
Bacteria	Lentisphaerae						2|256845	0.07372	0.07372	0.01605	0.00687	0.03166	0	0	0	0	0	0	0	0	0	0	0	0	0	0	0	0	0	0	0	0	0	0	0.00014	0	0	0	0	0	0	0	0	0	0	0.00032	0	0	0
Bacteria	Lentisphaerae	Lentisphaeria					2|256845|1313211	0.07372	0.07372	0.01605	0.00687	0.03166	0	0	0	0	0	0	0	0	0	0	0	0	0	0	0	0	0	0	0	0	0	0	0.00014	0	0	0	0	0	0	0	0	0	0	0.00032	0	0	0
Bacteria	Lentisphaerae	Lentisphaeria	Victivallales				2|256845|1313211|278082	0.07372	0.07372	0.01605	0.00687	0.03166	0	0	0	0	0	0	0	0	0	0	0	0	0	0	0	0	0	0	0	0	0	0	0.00014	0	0	0	0	0	0	0	0	0	0	0.00032	0	0	0
Bacteria	Lentisphaerae	Lentisphaeria	Victivallales	Victivallaceae			2|256845|1313211|278082|255528	0.07372	0.07372	0.01605	0.00687	0.03166	0	0	0	0	0	0	0	0	0	0	0	0	0	0	0	0	0	0	0	0	0	0	0.00014	0	0	0	0	0	0	0	0	0	0	0.00032	0	0	0
Bacteria	Lentisphaerae	Lentisphaeria	Victivallales	Victivallaceae	Victivallis		2|256845|1313211|278082|255528|172900	0.07372	0.07372	0.01605	0.00687	0.03166	0	0	0	0	0	0	0	0	0	0	0	0	0	0	0	0	0	0	0	0	0	0	0.00014	0	0	0	0	0	0	0	0	0	0	0.00032	0	0	0
Bacteria	Lentisphaerae	Lentisphaeria	Victivallales	Victivallaceae	Victivallis	Victivallis_vadensis	2|256845|1313211|278082|255528|172900|172901	0.07372	0.07372	0.01605	0.00687	0.03166	0	0	0	0	0	0	0	0	0	0	0	0	0	0	0	0	0	0	0	0	0	0	0.00014	0	0	0	0	0	0	0	0	0	0	0.00032	0	0	0
Bacteria	Nitrospirae						2|40117	0	0	0	0	0	0	0	0	0	0	0	0	0	0	0	0	0	0	0	0	0	0	0	0	0	0	0	0	0	0	0	0	0	0	0	0	0	0	0	0	0	0
Bacteria	Nitrospirae	Nitrospira					2|40117|203693	0	0	0	0	0	0	0	0	0	0	0	0	0	0	0	0	0	0	0	0	0	0	0	0	0	0	0	0	0	0	0	0	0	0	0	0	0	0	0	0	0	0
Bacteria	Nitrospirae	Nitrospira	Nitrospirales				2|40117|203693|189778	0	0	0	0	0	0	0	0	0	0	0	0	0	0	0	0	0	0	0	0	0	0	0	0	0	0	0	0	0	0	0	0	0	0	0	0	0	0	0	0	0	0
Bacteria	Nitrospirae	Nitrospira	Nitrospirales	Nitrospiraceae			2|40117|203693|189778|189779	0	0	0	0	0	0	0	0	0	0	0	0	0	0	0	0	0	0	0	0	0	0	0	0	0	0	0	0	0	0	0	0	0	0	0	0	0	0	0	0	0	0
Bacteria	Nitrospirae	Nitrospira	Nitrospirales	Nitrospiraceae	Nitrospira		2|40117|203693|189778|189779|1234	0	0	0	0	0	0	0	0	0	0	0	0	0	0	0	0	0	0	0	0	0	0	0	0	0	0	0	0	0	0	0	0	0	0	0	0	0	0	0	0	0	0
Bacteria	Nitrospirae	Nitrospira	Nitrospirales	Nitrospiraceae	Nitrospira	Nitrospira_sp_CG24D	2|40117|203693|189778|189779|1234|1985130	0	0	0	0	0	0	0	0	0	0	0	0	0	0	0	0	0	0	0	0	0	0	0	0	0	0	0	0	0	0	0	0	0	0	0	0	0	0	0	0	0	0
Bacteria	Nitrospirae	Nitrospira	Nitrospirales	Nitrospiraceae	Nitrospira	Nitrospira_sp_ST_bin4	2|40117|203693|189778|189779|1234|1978764	0	0	0	0	0	0	0	0	0	0	0	0	0	0	0	0	0	0	0	0	0	0	0	0	0	0	0	0	0	0	0	0	0	0	0	0	0	0	0	0	0	0
Bacteria	Planctomycetes						2|203682	0	0	0	0	0	0	0	0	0	0	0	0	0.29045	0.33194	0.60713	0.03392	0	0	0	0	0	0	0	0	0	0	0	0	0	0	0	0	0	0	0	0	0	0	0	0	0	0
Bacteria	Planctomycetes	Planctomycetia					2|203682|203683	0	0	0	0	0	0	0	0	0	0	0	0	0.29045	0.33194	0.60713	0.03392	0	0	0	0	0	0	0	0	0	0	0	0	0	0	0	0	0	0	0	0	0	0	0	0	0	0
Bacteria	Planctomycetes	Planctomycetia	Planctomycetales				2|203682|203683|112	0	0	0	0	0	0	0	0	0	0	0	0	0.29045	0.33194	0.60713	0.03392	0	0	0	0	0	0	0	0	0	0	0	0	0	0	0	0	0	0	0	0	0	0	0	0	0	0
Bacteria	Planctomycetes	Planctomycetia	Planctomycetales	Gemmataceae			2|203682|203683|112|1914233	0	0	0	0	0	0	0	0	0	0	0	0	0.09652	0.0892	0.07825	0.01699	0	0	0	0	0	0	0	0	0	0	0	0	0	0	0	0	0	0	0	0	0	0	0	0	0	0
Bacteria	Planctomycetes	Planctomycetia	Planctomycetales	Gemmataceae	Fimbriiglobus		2|203682|203683|112|1914233|1914234	0	0	0	0	0	0	0	0	0	0	0	0	0.09652	0.0892	0.07825	0.01699	0	0	0	0	0	0	0	0	0	0	0	0	0	0	0	0	0	0	0	0	0	0	0	0	0	0
Bacteria	Planctomycetes	Planctomycetia	Planctomycetales	Gemmataceae	Fimbriiglobus	Fimbriiglobus_ruber	2|203682|203683|112|1914233|1914234|1908690	0	0	0	0	0	0	0	0	0	0	0	0	0.09652	0.0892	0.07825	0.01699	0	0	0	0	0	0	0	0	0	0	0	0	0	0	0	0	0	0	0	0	0	0	0	0	0	0
Bacteria	Planctomycetes	Planctomycetia	Planctomycetales	Gemmataceae	Gemmata		2|203682|203683|112|1914233|113	0	0	0	0	0	0	0	0	0	0	0	0	0	0	0	0	0	0	0	0	0	0	0	0	0	0	0	0	0	0	0	0	0	0	0	0	0	0	0	0	0	0
Bacteria	Planctomycetes	Planctomycetia	Planctomycetales	Gemmataceae	Gemmata	Gemmata_obscuriglobus	2|203682|203683|112|1914233|113|114	0	0	0	0	0	0	0	0	0	0	0	0	0	0	0	0	0	0	0	0	0	0	0	0	0	0	0	0	0	0	0	0	0	0	0	0	0	0	0	0	0	0
Bacteria	Planctomycetes	Planctomycetia	Planctomycetales	Isosphaeraceae			2|203682|203683|112|1763524	0	0	0	0	0	0	0	0	0	0	0	0	0.19393	0.24274	0.52888	0.01693	0	0	0	0	0	0	0	0	0	0	0	0	0	0	0	0	0	0	0	0	0	0	0	0	0	0
Bacteria	Planctomycetes	Planctomycetia	Planctomycetales	Isosphaeraceae	Paludisphaera		2|203682|203683|112|1763524|1763521	0	0	0	0	0	0	0	0	0	0	0	0	0.19393	0.24274	0.52888	0.01693	0	0	0	0	0	0	0	0	0	0	0	0	0	0	0	0	0	0	0	0	0	0	0	0	0	0
Bacteria	Planctomycetes	Planctomycetia	Planctomycetales	Isosphaeraceae	Paludisphaera	Paludisphaera_borealis	2|203682|203683|112|1763524|1763521|1387353	0	0	0	0	0	0	0	0	0	0	0	0	0.19393	0.24274	0.52888	0.01693	0	0	0	0	0	0	0	0	0	0	0	0	0	0	0	0	0	0	0	0	0	0	0	0	0	0
Bacteria	Planctomycetes	Planctomycetia	Planctomycetales	Isosphaeraceae	Singulisphaera		2|203682|203683|112|1763524|466152	0	0	0	0	0	0	0	0	0	0	0	0	0	0	0	0	0	0	0	0	0	0	0	0	0	0	0	0	0	0	0	0	0	0	0	0	0	0	0	0	0	0
Bacteria	Planctomycetes	Planctomycetia	Planctomycetales	Isosphaeraceae	Singulisphaera	Singulisphaera_acidiphila	2|203682|203683|112|1763524|466152|466153	0	0	0	0	0	0	0	0	0	0	0	0	0	0	0	0	0	0	0	0	0	0	0	0	0	0	0	0	0	0	0	0	0	0	0	0	0	0	0	0	0	0
Bacteria	Proteobacteria						2|1224	10.56191	10.56191	4.40126	3.85198	6.26967	3.48237	3.14122	3.1834	3.19542	3.24428	12.38024	5.06358	68.60794	43.20825	54.62005	46.92735	68.59612	75.43672	75.22817	82.98958	3.34573	66.4637	98.70489	80.11519	16.06687	45.89852	64.90099	7.18262	3.80204	8.06929	11.58447	20.62234	13.54629	14.93587	3.70271	3.17731	1.04192	35.17486	31.73046	2.63035	6.31442	0.27316
Bacteria	Proteobacteria	Alphaproteobacteria					2|1224|28211	0	0	0	0	0.00116	0.14471	0.0426	0.08458	0.61472	0.02276	0.11661	0.19086	11.0008	32.63794	36.54858	9.264	0	4.41858	0	0	0	0	0	0	0	0	0.0089	0	0	0.02245	0.45171	0.00341	0.29257	0.93819	0.02139	0.15845	0.0317	0.11378	0.02575	0	3.12069	0.05802
Bacteria	Proteobacteria	Alphaproteobacteria	Alphaproteobacteria_unclassified					0	0	0	0	0	0	0	0	0	0	0	0	0	0.24231	0	0	0	0	0	0	0	0	0	0	0	0	0	0	0	0	0	0	0	0	0	0	0	0	0	0	0	0
Bacteria	Proteobacteria	Alphaproteobacteria	Alphaproteobacteria_unclassified				2|1224|28211|	0	0	0	0	0	0	0	0	0	0	0	0	0	0	0	0	0	0	0	0	0	0	0	0	0	0	0	0	0	0	0	0	0	0	0	0	0	0	0	0	0	0
Bacteria	Proteobacteria	Alphaproteobacteria	Alphaproteobacteria_unclassified	Alphaproteobacteria_unclassified				0	0	0	0	0	0	0	0	0	0	0	0	0	0.24231	0	0	0	0	0	0	0	0	0	0	0	0	0	0	0	0	0	0	0	0	0	0	0	0	0	0	0	0
Bacteria	Proteobacteria	Alphaproteobacteria	Alphaproteobacteria_unclassified	Alphaproteobacteria_unclassified			2|1224|28211||	0	0	0	0	0	0	0	0	0	0	0	0	0	0	0	0	0	0	0	0	0	0	0	0	0	0	0	0	0	0	0	0	0	0	0	0	0	0	0	0	0	0
Bacteria	Proteobacteria	Alphaproteobacteria	Alphaproteobacteria_unclassified	Alphaproteobacteria_unclassified	Alphaproteobacteria_unclassified			0	0	0	0	0	0	0	0	0	0	0	0	0	0	0	0	0	0	0	0	0	0	0	0	0	0	0	0	0	0	0	0	0	0	0	0	0	0	0	0	0	0
Bacteria	Proteobacteria	Alphaproteobacteria	Alphaproteobacteria_unclassified	Alphaproteobacteria_unclassified	Alphaproteobacteria_unclassified		2|1224|28211|||	0	0	0	0	0	0	0	0	0	0	0	0	0	0	0	0	0	0	0	0	0	0	0	0	0	0	0	0	0	0	0	0	0	0	0	0	0	0	0	0	0	0
Bacteria	Proteobacteria	Alphaproteobacteria	Alphaproteobacteria_unclassified	Alphaproteobacteria_unclassified	Alphaproteobacteria_unclassified	Alphaproteobacteria_bacterium_13_2_20CM_2_64_7	2|1224|28211||||1803507	0	0	0	0	0	0	0	0	0	0	0	0	0	0	0	0	0	0	0	0	0	0	0	0	0	0	0	0	0	0	0	0	0	0	0	0	0	0	0	0	0	0
Bacteria	Proteobacteria	Alphaproteobacteria	Alphaproteobacteria_unclassified	Alphaproteobacteria_unclassified	Phreatobacter		2|1224|28211|||1632780	0	0	0	0	0	0	0	0	0	0	0	0	0	0.24231	0	0	0	0	0	0	0	0	0	0	0	0	0	0	0	0	0	0	0	0	0	0	0	0	0	0	0	0
Bacteria	Proteobacteria	Alphaproteobacteria	Alphaproteobacteria_unclassified	Alphaproteobacteria_unclassified	Phreatobacter	Phreatobacter_cathodiphilus	2|1224|28211|||1632780|1868589	0	0	0	0	0	0	0	0	0	0	0	0	0	0.24231	0	0	0	0	0	0	0	0	0	0	0	0	0	0	0	0	0	0	0	0	0	0	0	0	0	0	0	0
Bacteria	Proteobacteria	Alphaproteobacteria	Caulobacterales				2|1224|28211|204458	0	0	0	0	0.00116	0.13895	0.0426	0.08207	0.57701	0.02276	0	0	9.05501	11.55795	16.86926	5.19778	0	0	0	0	0	0	0	0	0	0	0	0	0	0	0	0	0	0.05142	0	0	0	0	0	0	0	0
Bacteria	Proteobacteria	Alphaproteobacteria	Caulobacterales	Caulobacteraceae			2|1224|28211|204458|76892	0	0	0	0	0.00116	0.13895	0.0426	0.08207	0.57701	0.02276	0	0	9.05501	11.55795	16.86926	5.19778	0	0	0	0	0	0	0	0	0	0	0	0	0	0	0	0	0	0.05142	0	0	0	0	0	0	0	0
Bacteria	Proteobacteria	Alphaproteobacteria	Caulobacterales	Caulobacteraceae	Brevundimonas		2|1224|28211|204458|76892|41275	0	0	0	0	0.00116	0.13895	0.0426	0.08207	0.57701	0.02276	0	0	9.05501	11.11378	16.86926	5.19592	0	0	0	0	0	0	0	0	0	0	0	0	0	0	0	0	0	0.05142	0	0	0	0	0	0	0	0
Bacteria	Proteobacteria	Alphaproteobacteria	Caulobacterales	Caulobacteraceae	Brevundimonas	Brevundimonas_abyssalis	2|1224|28211|204458|76892|41275|1125965	0	0	0	0	0	0	0	0	0	0	0	0	0	0.47017	0	0	0	0	0	0	0	0	0	0	0	0	0	0	0	0	0	0	0	0	0	0	0	0	0	0	0	0
Bacteria	Proteobacteria	Alphaproteobacteria	Caulobacterales	Caulobacteraceae	Brevundimonas	Brevundimonas_diminuta	2|1224|28211|204458|76892|41275|293	0	0	0	0	0.00116	0.1245	0.0426	0.08119	0.54329	0.02276	0	0	0.06877	0	0	3.31556	0	0	0	0	0	0	0	0	0	0	0	0	0	0	0	0	0	0.05142	0	0	0	0	0	0	0	0
Bacteria	Proteobacteria	Alphaproteobacteria	Caulobacterales	Caulobacteraceae	Brevundimonas	Brevundimonas_naejangsanensis	2|1224|28211|204458|76892|41275|588932	0	0	0	0	0	0.01445	0	0.00088	0.03372	0	0	0	0	0	0	0.70386	0	0	0	0	0	0	0	0	0	0	0	0	0	0	0	0	0	0	0	0	0	0	0	0	0	0
Bacteria	Proteobacteria	Alphaproteobacteria	Caulobacterales	Caulobacteraceae	Brevundimonas	Brevundimonas_subvibrioides	2|1224|28211|204458|76892|41275|74313	0	0	0	0	0	0	0	0	0	0	0	0	0.16734	0.07389	0.31117	0.01783	0	0	0	0	0	0	0	0	0	0	0	0	0	0	0	0	0	0	0	0	0	0	0	0	0	0
Bacteria	Proteobacteria	Alphaproteobacteria	Caulobacterales	Caulobacteraceae	Brevundimonas	Brevundimonas_vesicularis	2|1224|28211|204458|76892|41275|41276	0	0	0	0	0	0	0	0	0	0	0	0	8.8189	1.61144	3.16032	1.0394	0	0	0	0	0	0	0	0	0	0	0	0	0	0	0	0	0	0	0	0	0	0	0	0	0	0
Bacteria	Proteobacteria	Alphaproteobacteria	Caulobacterales	Caulobacteraceae	Brevundimonas	Brevundimonas_viscosa	2|1224|28211|204458|76892|41275|871741	0	0	0	0	0	0	0	0	0	0	0	0	0	8.95827	13.39778	0.11926	0	0	0	0	0	0	0	0	0	0	0	0	0	0	0	0	0	0	0	0	0	0	0	0	0	0
Bacteria	Proteobacteria	Alphaproteobacteria	Caulobacterales	Caulobacteraceae	Phenylobacterium		2|1224|28211|204458|76892|20	0	0	0	0	0	0	0	0	0	0	0	0	0	0.44418	0	0.00186	0	0	0	0	0	0	0	0	0	0	0	0	0	0	0	0	0	0	0	0	0	0	0	0	0	0
Bacteria	Proteobacteria	Alphaproteobacteria	Caulobacterales	Caulobacteraceae	Phenylobacterium	Phenylobacterium_sp_RIFCSPHIGHO2_01_FULL_69_31	2|1224|28211|204458|76892|20|1801944	0	0	0	0	0	0	0	0	0	0	0	0	0	0.44418	0	0.00186	0	0	0	0	0	0	0	0	0	0	0	0	0	0	0	0	0	0	0	0	0	0	0	0	0	0
Bacteria	Proteobacteria	Alphaproteobacteria	Rhizobiales				2|1224|28211|356	0	0	0	0	0	0.00576	0	0	0.03771	0	0	0	1.43949	11.23001	9.28494	2.17962	0	0	0	0	0	0	0	0	0	0	0.00365	0	0	0.00061	0.0004	0	0.06841	0.45529	0.00345	0.01728	0.00193	0.01252	0.00655	0	0	0
Bacteria	Proteobacteria	Alphaproteobacteria	Rhizobiales	Aurantimonadaceae			2|1224|28211|356|255475	0	0	0	0	0	0	0	0	0	0	0	0	0	0.13407	0	0	0	0	0	0	0	0	0	0	0	0	0	0	0	0	0	0	0	0	0	0	0	0	0	0	0	0
Bacteria	Proteobacteria	Alphaproteobacteria	Rhizobiales	Aurantimonadaceae	Aurantimonas		2|1224|28211|356|255475|182269	0	0	0	0	0	0	0	0	0	0	0	0	0	0.03083	0	0	0	0	0	0	0	0	0	0	0	0	0	0	0	0	0	0	0	0	0	0	0	0	0	0	0	0
Bacteria	Proteobacteria	Alphaproteobacteria	Rhizobiales	Aurantimonadaceae	Aurantimonas	Aureimonas_jatrophae	2|1224|28211|356|255475|182269|1166073	0	0	0	0	0	0	0	0	0	0	0	0	0	0.03083	0	0	0	0	0	0	0	0	0	0	0	0	0	0	0	0	0	0	0	0	0	0	0	0	0	0	0	0
Bacteria	Proteobacteria	Alphaproteobacteria	Rhizobiales	Aurantimonadaceae	Aureimonas		2|1224|28211|356|255475|414371	0	0	0	0	0	0	0	0	0	0	0	0	0	0.10324	0	0	0	0	0	0	0	0	0	0	0	0	0	0	0	0	0	0	0	0	0	0	0	0	0	0	0	0
Bacteria	Proteobacteria	Alphaproteobacteria	Rhizobiales	Aurantimonadaceae	Aureimonas	Aureimonas_altamirensis	2|1224|28211|356|255475|414371|370622	0	0	0	0	0	0	0	0	0	0	0	0	0	0.10324	0	0	0	0	0	0	0	0	0	0	0	0	0	0	0	0	0	0	0	0	0	0	0	0	0	0	0	0
Bacteria	Proteobacteria	Alphaproteobacteria	Rhizobiales	Aurantimonadaceae	Martelella		2|1224|28211|356|255475|293088	0	0	0	0	0	0	0	0	0	0	0	0	0	0	0	0	0	0	0	0	0	0	0	0	0	0	0	0	0	0	0	0	0	0	0	0	0	0	0	0	0	0
Bacteria	Proteobacteria	Alphaproteobacteria	Rhizobiales	Aurantimonadaceae	Martelella	Martelella_mediterranea	2|1224|28211|356|255475|293088|293089	0	0	0	0	0	0	0	0	0	0	0	0	0	0	0	0	0	0	0	0	0	0	0	0	0	0	0	0	0	0	0	0	0	0	0	0	0	0	0	0	0	0
Bacteria	Proteobacteria	Alphaproteobacteria	Rhizobiales	Aurantimonadaceae	Martelella	Martelella_sp	2|1224|28211|356|255475|293088|1969699	0	0	0	0	0	0	0	0	0	0	0	0	0	0	0	0	0	0	0	0	0	0	0	0	0	0	0	0	0	0	0	0	0	0	0	0	0	0	0	0	0	0
Bacteria	Proteobacteria	Alphaproteobacteria	Rhizobiales	Bradyrhizobiaceae			2|1224|28211|356|41294	0	0	0	0	0	0	0	0	0	0	0	0	0.49684	5.60428	3.15144	0.08001	0	0	0	0	0	0	0	0	0	0	0	0	0	0	0	0	0	0	0	0	0	0	0	0	0	0
Bacteria	Proteobacteria	Alphaproteobacteria	Rhizobiales	Bradyrhizobiaceae	Afipia		2|1224|28211|356|41294|1033	0	0	0	0	0	0	0	0	0	0	0	0	0	0	0	0	0	0	0	0	0	0	0	0	0	0	0	0	0	0	0	0	0	0	0	0	0	0	0	0	0	0
Bacteria	Proteobacteria	Alphaproteobacteria	Rhizobiales	Bradyrhizobiaceae	Afipia	Afipia_sp_Root123D2	2|1224|28211|356|41294|1033|1736436	0	0	0	0	0	0	0	0	0	0	0	0	0	0	0	0	0	0	0	0	0	0	0	0	0	0	0	0	0	0	0	0	0	0	0	0	0	0	0	0	0	0
Bacteria	Proteobacteria	Alphaproteobacteria	Rhizobiales	Bradyrhizobiaceae	Bosea		2|1224|28211|356|41294|85413	0	0	0	0	0	0	0	0	0	0	0	0	0	5.60428	2.45324	0.07578	0	0	0	0	0	0	0	0	0	0	0	0	0	0	0	0	0	0	0	0	0	0	0	0	0	0
Bacteria	Proteobacteria	Alphaproteobacteria	Rhizobiales	Bradyrhizobiaceae	Bosea	Bosea_lupini	2|1224|28211|356|41294|85413|1036779	0	0	0	0	0	0	0	0	0	0	0	0	0	0	0	0	0	0	0	0	0	0	0	0	0	0	0	0	0	0	0	0	0	0	0	0	0	0	0	0	0	0
Bacteria	Proteobacteria	Alphaproteobacteria	Rhizobiales	Bradyrhizobiaceae	Bosea	Bosea_sp_DSM_18164	2|1224|28211|356|41294|85413|1881058	0	0	0	0	0	0	0	0	0	0	0	0	0	0	0	0	0	0	0	0	0	0	0	0	0	0	0	0	0	0	0	0	0	0	0	0	0	0	0	0	0	0
Bacteria	Proteobacteria	Alphaproteobacteria	Rhizobiales	Bradyrhizobiaceae	Bosea	Bosea_sp_Leaf344	2|1224|28211|356|41294|85413|1736346	0	0	0	0	0	0	0	0	0	0	0	0	0	5.51977	2.45324	0	0	0	0	0	0	0	0	0	0	0	0	0	0	0	0	0	0	0	0	0	0	0	0	0	0	0
Bacteria	Proteobacteria	Alphaproteobacteria	Rhizobiales	Bradyrhizobiaceae	Bosea	Bosea_sp_WAO	2|1224|28211|356|41294|85413|406341	0	0	0	0	0	0	0	0	0	0	0	0	0	0	0	0	0	0	0	0	0	0	0	0	0	0	0	0	0	0	0	0	0	0	0	0	0	0	0	0	0	0
Bacteria	Proteobacteria	Alphaproteobacteria	Rhizobiales	Bradyrhizobiaceae	Bosea	Bosea_thiooxidans	2|1224|28211|356|41294|85413|53254	0	0	0	0	0	0	0	0	0	0	0	0	0	0	0	0.07578	0	0	0	0	0	0	0	0	0	0	0	0	0	0	0	0	0	0	0	0	0	0	0	0	0	0
Bacteria	Proteobacteria	Alphaproteobacteria	Rhizobiales	Bradyrhizobiaceae	Bosea	Bosea_vaviloviae	2|1224|28211|356|41294|85413|1526658	0	0	0	0	0	0	0	0	0	0	0	0	0	0.08451	0	0	0	0	0	0	0	0	0	0	0	0	0	0	0	0	0	0	0	0	0	0	0	0	0	0	0	0
Bacteria	Proteobacteria	Alphaproteobacteria	Rhizobiales	Bradyrhizobiaceae	Bradyrhizobium		2|1224|28211|356|41294|374	0	0	0	0	0	0	0	0	0	0	0	0	0	0	0	0	0	0	0	0	0	0	0	0	0	0	0	0	0	0	0	0	0	0	0	0	0	0	0	0	0	0
Bacteria	Proteobacteria	Alphaproteobacteria	Rhizobiales	Bradyrhizobiaceae	Bradyrhizobium	Bradyrhizobium_arachidis	2|1224|28211|356|41294|374|858423	0	0	0	0	0	0	0	0	0	0	0	0	0	0	0	0	0	0	0	0	0	0	0	0	0	0	0	0	0	0	0	0	0	0	0	0	0	0	0	0	0	0
Bacteria	Proteobacteria	Alphaproteobacteria	Rhizobiales	Bradyrhizobiaceae	Bradyrhizobium	Bradyrhizobium_diazoefficiens	2|1224|28211|356|41294|374|1355477	0	0	0	0	0	0	0	0	0	0	0	0	0	0	0	0	0	0	0	0	0	0	0	0	0	0	0	0	0	0	0	0	0	0	0	0	0	0	0	0	0	0
Bacteria	Proteobacteria	Alphaproteobacteria	Rhizobiales	Bradyrhizobiaceae	Bradyrhizobium	Bradyrhizobium_elkanii	2|1224|28211|356|41294|374|29448	0	0	0	0	0	0	0	0	0	0	0	0	0	0	0	0	0	0	0	0	0	0	0	0	0	0	0	0	0	0	0	0	0	0	0	0	0	0	0	0	0	0
Bacteria	Proteobacteria	Alphaproteobacteria	Rhizobiales	Bradyrhizobiaceae	Bradyrhizobium	Bradyrhizobium_japonicum	2|1224|28211|356|41294|374|375	0	0	0	0	0	0	0	0	0	0	0	0	0	0	0	0	0	0	0	0	0	0	0	0	0	0	0	0	0	0	0	0	0	0	0	0	0	0	0	0	0	0
Bacteria	Proteobacteria	Alphaproteobacteria	Rhizobiales	Bradyrhizobiaceae	Bradyrhizobium	Bradyrhizobium_lablabi	2|1224|28211|356|41294|374|722472	0	0	0	0	0	0	0	0	0	0	0	0	0	0	0	0	0	0	0	0	0	0	0	0	0	0	0	0	0	0	0	0	0	0	0	0	0	0	0	0	0	0
Bacteria	Proteobacteria	Alphaproteobacteria	Rhizobiales	Bradyrhizobiaceae	Bradyrhizobium	Bradyrhizobium_ottawaense	2|1224|28211|356|41294|374|931866	0	0	0	0	0	0	0	0	0	0	0	0	0	0	0	0	0	0	0	0	0	0	0	0	0	0	0	0	0	0	0	0	0	0	0	0	0	0	0	0	0	0
Bacteria	Proteobacteria	Alphaproteobacteria	Rhizobiales	Bradyrhizobiaceae	Bradyrhizobium	Bradyrhizobium_yuanmingense	2|1224|28211|356|41294|374|108015	0	0	0	0	0	0	0	0	0	0	0	0	0	0	0	0	0	0	0	0	0	0	0	0	0	0	0	0	0	0	0	0	0	0	0	0	0	0	0	0	0	0
Bacteria	Proteobacteria	Alphaproteobacteria	Rhizobiales	Bradyrhizobiaceae	Nitrobacter		2|1224|28211|356|41294|911	0	0	0	0	0	0	0	0	0	0	0	0	0.49684	0	0.69821	0.00422	0	0	0	0	0	0	0	0	0	0	0	0	0	0	0	0	0	0	0	0	0	0	0	0	0	0
Bacteria	Proteobacteria	Alphaproteobacteria	Rhizobiales	Bradyrhizobiaceae	Nitrobacter	Nitrobacter_hamburgensis	2|1224|28211|356|41294|911|912	0	0	0	0	0	0	0	0	0	0	0	0	0	0	0	0	0	0	0	0	0	0	0	0	0	0	0	0	0	0	0	0	0	0	0	0	0	0	0	0	0	0
Bacteria	Proteobacteria	Alphaproteobacteria	Rhizobiales	Bradyrhizobiaceae	Nitrobacter	Nitrobacter_sp_Nb_311A	2|1224|28211|356|41294|911|314253	0	0	0	0	0	0	0	0	0	0	0	0	0	0	0.03205	0	0	0	0	0	0	0	0	0	0	0	0	0	0	0	0	0	0	0	0	0	0	0	0	0	0	0
Bacteria	Proteobacteria	Alphaproteobacteria	Rhizobiales	Bradyrhizobiaceae	Nitrobacter	Nitrobacter_vulgaris	2|1224|28211|356|41294|911|29421	0	0	0	0	0	0	0	0	0	0	0	0	0.49684	0	0.66616	0.00422	0	0	0	0	0	0	0	0	0	0	0	0	0	0	0	0	0	0	0	0	0	0	0	0	0	0
Bacteria	Proteobacteria	Alphaproteobacteria	Rhizobiales	Bradyrhizobiaceae	Nitrobacter	Nitrobacter_winogradskyi	2|1224|28211|356|41294|911|913	0	0	0	0	0	0	0	0	0	0	0	0	0	0	0	0	0	0	0	0	0	0	0	0	0	0	0	0	0	0	0	0	0	0	0	0	0	0	0	0	0	0
Bacteria	Proteobacteria	Alphaproteobacteria	Rhizobiales	Bradyrhizobiaceae	Oligotropha		2|1224|28211|356|41294|40136	0	0	0	0	0	0	0	0	0	0	0	0	0	0	0	0	0	0	0	0	0	0	0	0	0	0	0	0	0	0	0	0	0	0	0	0	0	0	0	0	0	0
Bacteria	Proteobacteria	Alphaproteobacteria	Rhizobiales	Bradyrhizobiaceae	Oligotropha	Oligotropha_carboxidovorans	2|1224|28211|356|41294|40136|40137	0	0	0	0	0	0	0	0	0	0	0	0	0	0	0	0	0	0	0	0	0	0	0	0	0	0	0	0	0	0	0	0	0	0	0	0	0	0	0	0	0	0
Bacteria	Proteobacteria	Alphaproteobacteria	Rhizobiales	Bradyrhizobiaceae	Rhodopseudomonas		2|1224|28211|356|41294|1073	0	0	0	0	0	0	0	0	0	0	0	0	0	0	0	0	0	0	0	0	0	0	0	0	0	0	0	0	0	0	0	0	0	0	0	0	0	0	0	0	0	0
Bacteria	Proteobacteria	Alphaproteobacteria	Rhizobiales	Bradyrhizobiaceae	Rhodopseudomonas	Rhodopseudomonas_faecalis	2|1224|28211|356|41294|1073|99655	0	0	0	0	0	0	0	0	0	0	0	0	0	0	0	0	0	0	0	0	0	0	0	0	0	0	0	0	0	0	0	0	0	0	0	0	0	0	0	0	0	0
Bacteria	Proteobacteria	Alphaproteobacteria	Rhizobiales	Bradyrhizobiaceae	Variibacter		2|1224|28211|356|41294|1649510	0	0	0	0	0	0	0	0	0	0	0	0	0	0	0	0	0	0	0	0	0	0	0	0	0	0	0	0	0	0	0	0	0	0	0	0	0	0	0	0	0	0
Bacteria	Proteobacteria	Alphaproteobacteria	Rhizobiales	Bradyrhizobiaceae	Variibacter	Variibacter_gotjawalensis	2|1224|28211|356|41294|1649510|1333996	0	0	0	0	0	0	0	0	0	0	0	0	0	0	0	0	0	0	0	0	0	0	0	0	0	0	0	0	0	0	0	0	0	0	0	0	0	0	0	0	0	0
Bacteria	Proteobacteria	Alphaproteobacteria	Rhizobiales	Brucellaceae			2|1224|28211|356|118882	0	0	0	0	0	0	0	0	0	0	0	0	0	0	0	1.2876	0	0	0	0	0	0	0	0	0	0	0	0	0	0	0	0	0	0.03181	0	0	0	0	0	0	0	0
Bacteria	Proteobacteria	Alphaproteobacteria	Rhizobiales	Brucellaceae	Falsochrobactrum		2|1224|28211|356|118882|1649292	0	0	0	0	0	0	0	0	0	0	0	0	0	0	0	0.19065	0	0	0	0	0	0	0	0	0	0	0	0	0	0	0	0	0	0.02054	0	0	0	0	0	0	0	0
Bacteria	Proteobacteria	Alphaproteobacteria	Rhizobiales	Brucellaceae	Falsochrobactrum	Falsochrobactrum_ovis	2|1224|28211|356|118882|1649292|1293442	0	0	0	0	0	0	0	0	0	0	0	0	0	0	0	0.14554	0	0	0	0	0	0	0	0	0	0	0	0	0	0	0	0	0	0	0	0	0	0	0	0	0	0
Bacteria	Proteobacteria	Alphaproteobacteria	Rhizobiales	Brucellaceae	Falsochrobactrum	Falsochrobactrum_sp_HN4	2|1224|28211|356|118882|1649292|2201899	0	0	0	0	0	0	0	0	0	0	0	0	0	0	0	0.04511	0	0	0	0	0	0	0	0	0	0	0	0	0	0	0	0	0	0.02054	0	0	0	0	0	0	0	0
Bacteria	Proteobacteria	Alphaproteobacteria	Rhizobiales	Brucellaceae	Ochrobactrum		2|1224|28211|356|118882|528	0	0	0	0	0	0	0	0	0	0	0	0	0	0	0	1.09695	0	0	0	0	0	0	0	0	0	0	0	0	0	0	0	0	0	0	0	0	0	0	0	0	0	0
Bacteria	Proteobacteria	Alphaproteobacteria	Rhizobiales	Brucellaceae	Ochrobactrum	Ochrobactrum_anthropi	2|1224|28211|356|118882|528|529	0	0	0	0	0	0	0	0	0	0	0	0	0	0	0	0.09259	0	0	0	0	0	0	0	0	0	0	0	0	0	0	0	0	0	0	0	0	0	0	0	0	0	0
Bacteria	Proteobacteria	Alphaproteobacteria	Rhizobiales	Brucellaceae	Ochrobactrum	Ochrobactrum_cytisi	2|1224|28211|356|118882|528|407152	0	0	0	0	0	0	0	0	0	0	0	0	0	0	0	0	0	0	0	0	0	0	0	0	0	0	0	0	0	0	0	0	0	0	0	0	0	0	0	0	0	0
Bacteria	Proteobacteria	Alphaproteobacteria	Rhizobiales	Brucellaceae	Ochrobactrum	Ochrobactrum_haematophilum	2|1224|28211|356|118882|528|419474	0	0	0	0	0	0	0	0	0	0	0	0	0	0	0	0	0	0	0	0	0	0	0	0	0	0	0	0	0	0	0	0	0	0	0	0	0	0	0	0	0	0
Bacteria	Proteobacteria	Alphaproteobacteria	Rhizobiales	Brucellaceae	Ochrobactrum	Ochrobactrum_intermedium	2|1224|28211|356|118882|528|94625	0	0	0	0	0	0	0	0	0	0	0	0	0	0	0	0.99077	0	0	0	0	0	0	0	0	0	0	0	0	0	0	0	0	0	0	0	0	0	0	0	0	0	0
Bacteria	Proteobacteria	Alphaproteobacteria	Rhizobiales	Brucellaceae	Ochrobactrum	Ochrobactrum_lupini	2|1224|28211|356|118882|528|255457	0	0	0	0	0	0	0	0	0	0	0	0	0	0	0	0	0	0	0	0	0	0	0	0	0	0	0	0	0	0	0	0	0	0	0	0	0	0	0	0	0	0
Bacteria	Proteobacteria	Alphaproteobacteria	Rhizobiales	Brucellaceae	Ochrobactrum	Ochrobactrum_oryzae	2|1224|28211|356|118882|528|335286	0	0	0	0	0	0	0	0	0	0	0	0	0	0	0	0	0	0	0	0	0	0	0	0	0	0	0	0	0	0	0	0	0	0	0	0	0	0	0	0	0	0
Bacteria	Proteobacteria	Alphaproteobacteria	Rhizobiales	Brucellaceae	Ochrobactrum	Ochrobactrum_pituitosum	2|1224|28211|356|118882|528|571256	0	0	0	0	0	0	0	0	0	0	0	0	0	0	0	0	0	0	0	0	0	0	0	0	0	0	0	0	0	0	0	0	0	0	0	0	0	0	0	0	0	0
Bacteria	Proteobacteria	Alphaproteobacteria	Rhizobiales	Brucellaceae	Ochrobactrum	Ochrobactrum_pseudogrignonense	2|1224|28211|356|118882|528|419475	0	0	0	0	0	0	0	0	0	0	0	0	0	0	0	0	0	0	0	0	0	0	0	0	0	0	0	0	0	0	0	0	0	0	0	0	0	0	0	0	0	0
Bacteria	Proteobacteria	Alphaproteobacteria	Rhizobiales	Brucellaceae	Ochrobactrum	Ochrobactrum_sp_POC9	2|1224|28211|356|118882|528|2203419	0	0	0	0	0	0	0	0	0	0	0	0	0	0	0	0.01359	0	0	0	0	0	0	0	0	0	0	0	0	0	0	0	0	0	0	0	0	0	0	0	0	0	0
Bacteria	Proteobacteria	Alphaproteobacteria	Rhizobiales	Brucellaceae	Ochrobactrum	Ochrobactrum_thiophenivorans	2|1224|28211|356|118882|528|571255	0	0	0	0	0	0	0	0	0	0	0	0	0	0	0	0	0	0	0	0	0	0	0	0	0	0	0	0	0	0	0	0	0	0	0	0	0	0	0	0	0	0
Bacteria	Proteobacteria	Alphaproteobacteria	Rhizobiales	Brucellaceae	Pseudochrobactrum		2|1224|28211|356|118882|354349	0	0	0	0	0	0	0	0	0	0	0	0	0	0	0	0	0	0	0	0	0	0	0	0	0	0	0	0	0	0	0	0	0	0.01127	0	0	0	0	0	0	0	0
Bacteria	Proteobacteria	Alphaproteobacteria	Rhizobiales	Brucellaceae	Pseudochrobactrum	Pseudochrobactrum_asaccharolyticum	2|1224|28211|356|118882|354349|354351	0	0	0	0	0	0	0	0	0	0	0	0	0	0	0	0	0	0	0	0	0	0	0	0	0	0	0	0	0	0	0	0	0	0.01127	0	0	0	0	0	0	0	0
Bacteria	Proteobacteria	Alphaproteobacteria	Rhizobiales	Hyphomicrobiaceae			2|1224|28211|356|45401	0	0	0	0	0	0	0	0	0	0	0	0	0.08083	0	0	0.00715	0	0	0	0	0	0	0	0	0	0	0	0	0	0	0	0	0	0.00431	0	0	0	0	0	0	0	0
Bacteria	Proteobacteria	Alphaproteobacteria	Rhizobiales	Hyphomicrobiaceae	Devosia		2|1224|28211|356|45401|46913	0	0	0	0	0	0	0	0	0	0	0	0	0.08083	0	0	0	0	0	0	0	0	0	0	0	0	0	0	0	0	0	0	0	0	0	0	0	0	0	0	0	0	0
Bacteria	Proteobacteria	Alphaproteobacteria	Rhizobiales	Hyphomicrobiaceae	Devosia	Devosia_elaeis	2|1224|28211|356|45401|46913|1770058	0	0	0	0	0	0	0	0	0	0	0	0	0	0	0	0	0	0	0	0	0	0	0	0	0	0	0	0	0	0	0	0	0	0	0	0	0	0	0	0	0	0
Bacteria	Proteobacteria	Alphaproteobacteria	Rhizobiales	Hyphomicrobiaceae	Devosia	Devosia_epidermidihirudinis	2|1224|28211|356|45401|46913|1293439	0	0	0	0	0	0	0	0	0	0	0	0	0	0	0	0	0	0	0	0	0	0	0	0	0	0	0	0	0	0	0	0	0	0	0	0	0	0	0	0	0	0
Bacteria	Proteobacteria	Alphaproteobacteria	Rhizobiales	Hyphomicrobiaceae	Devosia	Devosia_riboflavina	2|1224|28211|356|45401|46913|46914	0	0	0	0	0	0	0	0	0	0	0	0	0.07435	0	0	0	0	0	0	0	0	0	0	0	0	0	0	0	0	0	0	0	0	0	0	0	0	0	0	0	0	0
Bacteria	Proteobacteria	Alphaproteobacteria	Rhizobiales	Hyphomicrobiaceae	Devosia	Devosia_soli	2|1224|28211|356|45401|46913|361041	0	0	0	0	0	0	0	0	0	0	0	0	0.00648	0	0	0	0	0	0	0	0	0	0	0	0	0	0	0	0	0	0	0	0	0	0	0	0	0	0	0	0	0
Bacteria	Proteobacteria	Alphaproteobacteria	Rhizobiales	Hyphomicrobiaceae	Pelagibacterium		2|1224|28211|356|45401|1082930	0	0	0	0	0	0	0	0	0	0	0	0	0	0	0	0.00715	0	0	0	0	0	0	0	0	0	0	0	0	0	0	0	0	0	0.00431	0	0	0	0	0	0	0	0
Bacteria	Proteobacteria	Alphaproteobacteria	Rhizobiales	Hyphomicrobiaceae	Pelagibacterium	Pelagibacterium_sp_SCN_63_23	2|1224|28211|356|45401|1082930|1660124	0	0	0	0	0	0	0	0	0	0	0	0	0	0	0	0.00715	0	0	0	0	0	0	0	0	0	0	0	0	0	0	0	0	0	0	0	0	0	0	0	0	0	0
Bacteria	Proteobacteria	Alphaproteobacteria	Rhizobiales	Hyphomicrobiaceae	Pelagibacterium	Pelagibacterium_sp_XYN52	2|1224|28211|356|45401|1082930|2282655	0	0	0	0	0	0	0	0	0	0	0	0	0	0	0	0	0	0	0	0	0	0	0	0	0	0	0	0	0	0	0	0	0	0.00431	0	0	0	0	0	0	0	0
Bacteria	Proteobacteria	Alphaproteobacteria	Rhizobiales	Hyphomicrobiaceae	Rhodoplanes		2|1224|28211|356|45401|29407	0	0	0	0	0	0	0	0	0	0	0	0	0	0	0	0	0	0	0	0	0	0	0	0	0	0	0	0	0	0	0	0	0	0	0	0	0	0	0	0	0	0
Bacteria	Proteobacteria	Alphaproteobacteria	Rhizobiales	Hyphomicrobiaceae	Rhodoplanes	Rhodoplanes_sp_Z2_YC6860	2|1224|28211|356|45401|29407|674703	0	0	0	0	0	0	0	0	0	0	0	0	0	0	0	0	0	0	0	0	0	0	0	0	0	0	0	0	0	0	0	0	0	0	0	0	0	0	0	0	0	0
Bacteria	Proteobacteria	Alphaproteobacteria	Rhizobiales	Methylobacteriaceae			2|1224|28211|356|119045	0	0	0	0	0	0	0	0	0	0	0	0	0	1.73683	0	0.05563	0	0	0	0	0	0	0	0	0	0	0	0	0	0	0	0	0	0	0	0	0	0	0	0	0	0
Bacteria	Proteobacteria	Alphaproteobacteria	Rhizobiales	Methylobacteriaceae	Methylobacterium		2|1224|28211|356|119045|407	0	0	0	0	0	0	0	0	0	0	0	0	0	1.11742	0	0	0	0	0	0	0	0	0	0	0	0	0	0	0	0	0	0	0	0	0	0	0	0	0	0	0	0
Bacteria	Proteobacteria	Alphaproteobacteria	Rhizobiales	Methylobacteriaceae	Methylobacterium	Methylobacterium_radiotolerans	2|1224|28211|356|119045|407|31998	0	0	0	0	0	0	0	0	0	0	0	0	0	1.11742	0	0	0	0	0	0	0	0	0	0	0	0	0	0	0	0	0	0	0	0	0	0	0	0	0	0	0	0
Bacteria	Proteobacteria	Alphaproteobacteria	Rhizobiales	Methylobacteriaceae	Methylobacterium	Methylobacterium_sp_B4	2|1224|28211|356|119045|407|1938755	0	0	0	0	0	0	0	0	0	0	0	0	0	0	0	0	0	0	0	0	0	0	0	0	0	0	0	0	0	0	0	0	0	0	0	0	0	0	0	0	0	0
Bacteria	Proteobacteria	Alphaproteobacteria	Rhizobiales	Methylobacteriaceae	Methylobacterium	Methylobacterium_sp_DM1	2|1224|28211|356|119045|407|2067957	0	0	0	0	0	0	0	0	0	0	0	0	0	0	0	0	0	0	0	0	0	0	0	0	0	0	0	0	0	0	0	0	0	0	0	0	0	0	0	0	0	0
Bacteria	Proteobacteria	Alphaproteobacteria	Rhizobiales	Methylobacteriaceae	Methylorubrum		2|1224|28211|356|119045|2282523	0	0	0	0	0	0	0	0	0	0	0	0	0	0.55216	0	0.05563	0	0	0	0	0	0	0	0	0	0	0	0	0	0	0	0	0	0	0	0	0	0	0	0	0	0
Bacteria	Proteobacteria	Alphaproteobacteria	Rhizobiales	Methylobacteriaceae	Methylorubrum	Methylorubrum_extorquens	2|1224|28211|356|119045|2282523|408	0	0	0	0	0	0	0	0	0	0	0	0	0	0.55216	0	0.05563	0	0	0	0	0	0	0	0	0	0	0	0	0	0	0	0	0	0	0	0	0	0	0	0	0	0
Bacteria	Proteobacteria	Alphaproteobacteria	Rhizobiales	Methylobacteriaceae	Microvirga		2|1224|28211|356|119045|186650	0	0	0	0	0	0	0	0	0	0	0	0	0	0.06725	0	0	0	0	0	0	0	0	0	0	0	0	0	0	0	0	0	0	0	0	0	0	0	0	0	0	0	0
Bacteria	Proteobacteria	Alphaproteobacteria	Rhizobiales	Methylobacteriaceae	Microvirga	Microvirga_guangxiensis	2|1224|28211|356|119045|186650|549386	0	0	0	0	0	0	0	0	0	0	0	0	0	0.06725	0	0	0	0	0	0	0	0	0	0	0	0	0	0	0	0	0	0	0	0	0	0	0	0	0	0	0	0
Bacteria	Proteobacteria	Alphaproteobacteria	Rhizobiales	Methylobacteriaceae	Microvirga	Microvirga_sp_BSC39	2|1224|28211|356|119045|186650|1549810	0	0	0	0	0	0	0	0	0	0	0	0	0	0	0	0	0	0	0	0	0	0	0	0	0	0	0	0	0	0	0	0	0	0	0	0	0	0	0	0	0	0
Bacteria	Proteobacteria	Alphaproteobacteria	Rhizobiales	Methylocystaceae			2|1224|28211|356|31993	0	0	0	0	0	0	0	0	0	0	0	0	0	0	0	0	0	0	0	0	0	0	0	0	0	0	0	0	0	0	0	0	0	0	0	0	0	0	0	0	0	0
Bacteria	Proteobacteria	Alphaproteobacteria	Rhizobiales	Methylocystaceae	Methylopila		2|1224|28211|356|31993|61653	0	0	0	0	0	0	0	0	0	0	0	0	0	0	0	0	0	0	0	0	0	0	0	0	0	0	0	0	0	0	0	0	0	0	0	0	0	0	0	0	0	0
Bacteria	Proteobacteria	Alphaproteobacteria	Rhizobiales	Methylocystaceae	Methylopila	Methylopila_sp_Yamaguchi	2|1224|28211|356|31993|61653|1437817	0	0	0	0	0	0	0	0	0	0	0	0	0	0	0	0	0	0	0	0	0	0	0	0	0	0	0	0	0	0	0	0	0	0	0	0	0	0	0	0	0	0
Bacteria	Proteobacteria	Alphaproteobacteria	Rhizobiales	Phyllobacteriaceae			2|1224|28211|356|69277	0	0	0	0	0	0.00576	0	0	0.03771	0	0	0	0	0	0.21731	0.52416	0	0	0	0	0	0	0	0	0	0	0.00365	0	0	0.00061	0.0004	0	0.06841	0.41917	0.00345	0.01728	0.00193	0.01252	0.00655	0	0	0
Bacteria	Proteobacteria	Alphaproteobacteria	Rhizobiales	Phyllobacteriaceae	Aminobacter		2|1224|28211|356|69277|31988	0	0	0	0	0	0	0	0	0	0	0	0	0	0	0.21731	0	0	0	0	0	0	0	0	0	0	0	0	0	0	0	0	0	0	0	0	0	0	0	0	0	0	0
Bacteria	Proteobacteria	Alphaproteobacteria	Rhizobiales	Phyllobacteriaceae	Aminobacter	Aminobacter_aminovorans	2|1224|28211|356|69277|31988|83263	0	0	0	0	0	0	0	0	0	0	0	0	0	0	0.21731	0	0	0	0	0	0	0	0	0	0	0	0	0	0	0	0	0	0	0	0	0	0	0	0	0	0	0
Bacteria	Proteobacteria	Alphaproteobacteria	Rhizobiales	Phyllobacteriaceae	Aquamicrobium		2|1224|28211|356|69277|69278	0	0	0	0	0	0.00576	0	0	0.03771	0	0	0	0	0	0	0.52416	0	0	0	0	0	0	0	0	0	0	0.00365	0	0	0.00061	0.0004	0	0.06841	0.41917	0.00345	0.01728	0.00193	0.01252	0.00655	0	0	0
Bacteria	Proteobacteria	Alphaproteobacteria	Rhizobiales	Phyllobacteriaceae	Aquamicrobium	Aquamicrobium_aerolatum	2|1224|28211|356|69277|69278|561088	0	0	0	0	0	0.00576	0	0	0.03771	0	0	0	0	0	0	0.40264	0	0	0	0	0	0	0	0	0	0	0.00365	0	0	0.00061	0.0004	0	0.06841	0.41917	0.00345	0.01728	0.00193	0.01252	0.00655	0	0	0
Bacteria	Proteobacteria	Alphaproteobacteria	Rhizobiales	Phyllobacteriaceae	Aquamicrobium	Aquamicrobium_defluvii	2|1224|28211|356|69277|69278|69279	0	0	0	0	0	0	0	0	0	0	0	0	0	0	0	0.12152	0	0	0	0	0	0	0	0	0	0	0	0	0	0	0	0	0	0	0	0	0	0	0	0	0	0
Bacteria	Proteobacteria	Alphaproteobacteria	Rhizobiales	Phyllobacteriaceae	Mesorhizobium		2|1224|28211|356|69277|68287	0	0	0	0	0	0	0	0	0	0	0	0	0	0	0	0	0	0	0	0	0	0	0	0	0	0	0	0	0	0	0	0	0	0	0	0	0	0	0	0	0	0
Bacteria	Proteobacteria	Alphaproteobacteria	Rhizobiales	Phyllobacteriaceae	Mesorhizobium	Mesorhizobium_alhagi	2|1224|28211|356|69277|68287|475067	0	0	0	0	0	0	0	0	0	0	0	0	0	0	0	0	0	0	0	0	0	0	0	0	0	0	0	0	0	0	0	0	0	0	0	0	0	0	0	0	0	0
Bacteria	Proteobacteria	Alphaproteobacteria	Rhizobiales	Phyllobacteriaceae	Mesorhizobium	Mesorhizobium_huakuii	2|1224|28211|356|69277|68287|28104	0	0	0	0	0	0	0	0	0	0	0	0	0	0	0	0	0	0	0	0	0	0	0	0	0	0	0	0	0	0	0	0	0	0	0	0	0	0	0	0	0	0
Bacteria	Proteobacteria	Alphaproteobacteria	Rhizobiales	Phyllobacteriaceae	Mesorhizobium	Mesorhizobium_japonicum	2|1224|28211|356|69277|68287|2066070	0	0	0	0	0	0	0	0	0	0	0	0	0	0	0	0	0	0	0	0	0	0	0	0	0	0	0	0	0	0	0	0	0	0	0	0	0	0	0	0	0	0
Bacteria	Proteobacteria	Alphaproteobacteria	Rhizobiales	Phyllobacteriaceae	Mesorhizobium	Mesorhizobium_loti	2|1224|28211|356|69277|68287|381	0	0	0	0	0	0	0	0	0	0	0	0	0	0	0	0	0	0	0	0	0	0	0	0	0	0	0	0	0	0	0	0	0	0	0	0	0	0	0	0	0	0
Bacteria	Proteobacteria	Alphaproteobacteria	Rhizobiales	Phyllobacteriaceae	Mesorhizobium	Mesorhizobium_plurifarium	2|1224|28211|356|69277|68287|69974	0	0	0	0	0	0	0	0	0	0	0	0	0	0	0	0	0	0	0	0	0	0	0	0	0	0	0	0	0	0	0	0	0	0	0	0	0	0	0	0	0	0
Bacteria	Proteobacteria	Alphaproteobacteria	Rhizobiales	Phyllobacteriaceae	Phyllobacterium		2|1224|28211|356|69277|28100	0	0	0	0	0	0	0	0	0	0	0	0	0	0	0	0	0	0	0	0	0	0	0	0	0	0	0	0	0	0	0	0	0	0	0	0	0	0	0	0	0	0
Bacteria	Proteobacteria	Alphaproteobacteria	Rhizobiales	Phyllobacteriaceae	Phyllobacterium	Phyllobacterium_myrsinacearum	2|1224|28211|356|69277|28100|28101	0	0	0	0	0	0	0	0	0	0	0	0	0	0	0	0	0	0	0	0	0	0	0	0	0	0	0	0	0	0	0	0	0	0	0	0	0	0	0	0	0	0
Bacteria	Proteobacteria	Alphaproteobacteria	Rhizobiales	Phyllobacteriaceae	Phyllobacterium	Phyllobacterium_sophorae	2|1224|28211|356|69277|28100|1520277	0	0	0	0	0	0	0	0	0	0	0	0	0	0	0	0	0	0	0	0	0	0	0	0	0	0	0	0	0	0	0	0	0	0	0	0	0	0	0	0	0	0
Bacteria	Proteobacteria	Alphaproteobacteria	Rhizobiales	Phyllobacteriaceae	Pseudaminobacter		2|1224|28211|356|69277|93368	0	0	0	0	0	0	0	0	0	0	0	0	0	0	0	0	0	0	0	0	0	0	0	0	0	0	0	0	0	0	0	0	0	0	0	0	0	0	0	0	0	0
Bacteria	Proteobacteria	Alphaproteobacteria	Rhizobiales	Phyllobacteriaceae	Pseudaminobacter	Pseudaminobacter_manganicus	2|1224|28211|356|69277|93368|1873176	0	0	0	0	0	0	0	0	0	0	0	0	0	0	0	0	0	0	0	0	0	0	0	0	0	0	0	0	0	0	0	0	0	0	0	0	0	0	0	0	0	0
Bacteria	Proteobacteria	Alphaproteobacteria	Rhizobiales	Rhizobiaceae			2|1224|28211|356|82115	0	0	0	0	0	0	0	0	0	0	0	0	0.86182	1.73065	5.91619	0.22508	0	0	0	0	0	0	0	0	0	0	0	0	0	0	0	0	0	0	0	0	0	0	0	0	0	0
Bacteria	Proteobacteria	Alphaproteobacteria	Rhizobiales	Rhizobiaceae	Agrobacterium		2|1224|28211|356|82115|357	0	0	0	0	0	0	0	0	0	0	0	0	0	0	0	0	0	0	0	0	0	0	0	0	0	0	0	0	0	0	0	0	0	0	0	0	0	0	0	0	0	0
Bacteria	Proteobacteria	Alphaproteobacteria	Rhizobiales	Rhizobiaceae	Agrobacterium	Agrobacterium_deltaense	2|1224|28211|356|82115|357|1183412	0	0	0	0	0	0	0	0	0	0	0	0	0	0	0	0	0	0	0	0	0	0	0	0	0	0	0	0	0	0	0	0	0	0	0	0	0	0	0	0	0	0
Bacteria	Proteobacteria	Alphaproteobacteria	Rhizobiales	Rhizobiaceae	Agrobacterium	Agrobacterium_fabrum	2|1224|28211|356|82115|357|1176649	0	0	0	0	0	0	0	0	0	0	0	0	0	0	0	0	0	0	0	0	0	0	0	0	0	0	0	0	0	0	0	0	0	0	0	0	0	0	0	0	0	0
Bacteria	Proteobacteria	Alphaproteobacteria	Rhizobiales	Rhizobiaceae	Agrobacterium	Agrobacterium_salinitolerans	2|1224|28211|356|82115|357|1183413	0	0	0	0	0	0	0	0	0	0	0	0	0	0	0	0	0	0	0	0	0	0	0	0	0	0	0	0	0	0	0	0	0	0	0	0	0	0	0	0	0	0
Bacteria	Proteobacteria	Alphaproteobacteria	Rhizobiales	Rhizobiaceae	Agrobacterium	Agrobacterium_sp_SCN_61_19	2|1224|28211|356|82115|357|1660088	0	0	0	0	0	0	0	0	0	0	0	0	0	0	0	0	0	0	0	0	0	0	0	0	0	0	0	0	0	0	0	0	0	0	0	0	0	0	0	0	0	0
Bacteria	Proteobacteria	Alphaproteobacteria	Rhizobiales	Rhizobiaceae	Agrobacterium	Agrobacterium_tumefaciens	2|1224|28211|356|82115|357|358	0	0	0	0	0	0	0	0	0	0	0	0	0	0	0	0	0	0	0	0	0	0	0	0	0	0	0	0	0	0	0	0	0	0	0	0	0	0	0	0	0	0
Bacteria	Proteobacteria	Alphaproteobacteria	Rhizobiales	Rhizobiaceae	Ensifer		2|1224|28211|356|82115|106591	0	0	0	0	0	0	0	0	0	0	0	0	0.79969	0	3.212	0	0	0	0	0	0	0	0	0	0	0	0	0	0	0	0	0	0	0	0	0	0	0	0	0	0	0
Bacteria	Proteobacteria	Alphaproteobacteria	Rhizobiales	Rhizobiaceae	Ensifer	Ensifer_adhaerens	2|1224|28211|356|82115|106591|106592	0	0	0	0	0	0	0	0	0	0	0	0	0.79969	0	3.212	0	0	0	0	0	0	0	0	0	0	0	0	0	0	0	0	0	0	0	0	0	0	0	0	0	0	0
Bacteria	Proteobacteria	Alphaproteobacteria	Rhizobiales	Rhizobiaceae	Neorhizobium		2|1224|28211|356|82115|1525371	0	0	0	0	0	0	0	0	0	0	0	0	0	0	0	0.00343	0	0	0	0	0	0	0	0	0	0	0	0	0	0	0	0	0	0	0	0	0	0	0	0	0	0
Bacteria	Proteobacteria	Alphaproteobacteria	Rhizobiales	Rhizobiaceae	Neorhizobium	Neorhizobium_galegae	2|1224|28211|356|82115|1525371|399	0	0	0	0	0	0	0	0	0	0	0	0	0	0	0	0	0	0	0	0	0	0	0	0	0	0	0	0	0	0	0	0	0	0	0	0	0	0	0	0	0	0
Bacteria	Proteobacteria	Alphaproteobacteria	Rhizobiales	Rhizobiaceae	Neorhizobium	Neorhizobium_sp_SOG26	2|1224|28211|356|82115|1525371|2060726	0	0	0	0	0	0	0	0	0	0	0	0	0	0	0	0.00343	0	0	0	0	0	0	0	0	0	0	0	0	0	0	0	0	0	0	0	0	0	0	0	0	0	0
Bacteria	Proteobacteria	Alphaproteobacteria	Rhizobiales	Rhizobiaceae	Rhizobium		2|1224|28211|356|82115|379	0	0	0	0	0	0	0	0	0	0	0	0	0.05397	1.73065	2.6136	0.22165	0	0	0	0	0	0	0	0	0	0	0	0	0	0	0	0	0	0	0	0	0	0	0	0	0	0
Bacteria	Proteobacteria	Alphaproteobacteria	Rhizobiales	Rhizobiaceae	Rhizobium	Rhizobium_anhuiense	2|1224|28211|356|82115|379|1184720	0	0	0	0	0	0	0	0	0	0	0	0	0	0	0	0	0	0	0	0	0	0	0	0	0	0	0	0	0	0	0	0	0	0	0	0	0	0	0	0	0	0
Bacteria	Proteobacteria	Alphaproteobacteria	Rhizobiales	Rhizobiaceae	Rhizobium	Rhizobium_leguminosarum	2|1224|28211|356|82115|379|384	0	0	0	0	0	0	0	0	0	0	0	0	0	0	0	0	0	0	0	0	0	0	0	0	0	0	0	0	0	0	0	0	0	0	0	0	0	0	0	0	0	0
Bacteria	Proteobacteria	Alphaproteobacteria	Rhizobiales	Rhizobiaceae	Rhizobium	Rhizobium_naphthalenivorans	2|1224|28211|356|82115|379|1118451	0	0	0	0	0	0	0	0	0	0	0	0	0	0.09501	0.10618	0.08158	0	0	0	0	0	0	0	0	0	0	0	0	0	0	0	0	0	0	0	0	0	0	0	0	0	0
Bacteria	Proteobacteria	Alphaproteobacteria	Rhizobiales	Rhizobiaceae	Rhizobium	Rhizobium_pusense	2|1224|28211|356|82115|379|648995	0	0	0	0	0	0	0	0	0	0	0	0	0	0	0	0	0	0	0	0	0	0	0	0	0	0	0	0	0	0	0	0	0	0	0	0	0	0	0	0	0	0
Bacteria	Proteobacteria	Alphaproteobacteria	Rhizobiales	Rhizobiaceae	Rhizobium	Rhizobium_sp_Leaf311	2|1224|28211|356|82115|379|1736332	0	0	0	0	0	0	0	0	0	0	0	0	0.05397	0.02483	0	0.01029	0	0	0	0	0	0	0	0	0	0	0	0	0	0	0	0	0	0	0	0	0	0	0	0	0	0
Bacteria	Proteobacteria	Alphaproteobacteria	Rhizobiales	Rhizobiaceae	Rhizobium	Rhizobium_sp_NT_26	2|1224|28211|356|82115|379|1125847	0	0	0	0	0	0	0	0	0	0	0	0	0	1.61082	2.50742	0.12978	0	0	0	0	0	0	0	0	0	0	0	0	0	0	0	0	0	0	0	0	0	0	0	0	0	0
Bacteria	Proteobacteria	Alphaproteobacteria	Rhizobiales	Rhizobiaceae	Rhizobium	Rhizobium_sp_TH135	2|1224|28211|356|82115|379|2067451	0	0	0	0	0	0	0	0	0	0	0	0	0	0	0	0	0	0	0	0	0	0	0	0	0	0	0	0	0	0	0	0	0	0	0	0	0	0	0	0	0	0
Bacteria	Proteobacteria	Alphaproteobacteria	Rhizobiales	Rhizobiaceae	Shinella		2|1224|28211|356|82115|323620	0	0	0	0	0	0	0	0	0	0	0	0	0	0	0	0	0	0	0	0	0	0	0	0	0	0	0	0	0	0	0	0	0	0	0	0	0	0	0	0	0	0
Bacteria	Proteobacteria	Alphaproteobacteria	Rhizobiales	Rhizobiaceae	Shinella	Shinella_sp_HZN7	2|1224|28211|356|82115|323620|879274	0	0	0	0	0	0	0	0	0	0	0	0	0	0	0	0	0	0	0	0	0	0	0	0	0	0	0	0	0	0	0	0	0	0	0	0	0	0	0	0	0	0
Bacteria	Proteobacteria	Alphaproteobacteria	Rhizobiales	Rhizobiaceae	Sinorhizobium		2|1224|28211|356|82115|28105	0	0	0	0	0	0	0	0	0	0	0	0	0.00816	0	0.09059	0	0	0	0	0	0	0	0	0	0	0	0	0	0	0	0	0	0	0	0	0	0	0	0	0	0	0
Bacteria	Proteobacteria	Alphaproteobacteria	Rhizobiales	Rhizobiaceae	Sinorhizobium	Sinorhizobium_fredii	2|1224|28211|356|82115|28105|380	0	0	0	0	0	0	0	0	0	0	0	0	0.00816	0	0.09059	0	0	0	0	0	0	0	0	0	0	0	0	0	0	0	0	0	0	0	0	0	0	0	0	0	0	0
Bacteria	Proteobacteria	Alphaproteobacteria	Rhizobiales	Rhizobiaceae	Sinorhizobium	Sinorhizobium_meliloti	2|1224|28211|356|82115|28105|382	0	0	0	0	0	0	0	0	0	0	0	0	0	0	0	0	0	0	0	0	0	0	0	0	0	0	0	0	0	0	0	0	0	0	0	0	0	0	0	0	0	0
Bacteria	Proteobacteria	Alphaproteobacteria	Rhizobiales	Rhizobiales_unclassified				0	0	0	0	0	0	0	0	0	0	0	0	0	2.02418	0	0	0	0	0	0	0	0	0	0	0	0	0	0	0	0	0	0	0	0	0	0	0	0	0	0	0	0
Bacteria	Proteobacteria	Alphaproteobacteria	Rhizobiales	Rhizobiales_unclassified			2|1224|28211|356|	0	0	0	0	0	0	0	0	0	0	0	0	0	0	0	0	0	0	0	0	0	0	0	0	0	0	0	0	0	0	0	0	0	0	0	0	0	0	0	0	0	0
Bacteria	Proteobacteria	Alphaproteobacteria	Rhizobiales	Rhizobiales_unclassified	Methyloceanibacter		2|1224|28211|356||1484898	0	0	0	0	0	0	0	0	0	0	0	0	0	2.02418	0	0	0	0	0	0	0	0	0	0	0	0	0	0	0	0	0	0	0	0	0	0	0	0	0	0	0	0
Bacteria	Proteobacteria	Alphaproteobacteria	Rhizobiales	Rhizobiales_unclassified	Methyloceanibacter	Methyloceanibacter_marginalis	2|1224|28211|356||1484898|1774971	0	0	0	0	0	0	0	0	0	0	0	0	0	2.02418	0	0	0	0	0	0	0	0	0	0	0	0	0	0	0	0	0	0	0	0	0	0	0	0	0	0	0	0
Bacteria	Proteobacteria	Alphaproteobacteria	Rhizobiales	Rhizobiales_unclassified	Methyloceanibacter	Methyloceanibacter_superfactus	2|1224|28211|356||1484898|1774969	0	0	0	0	0	0	0	0	0	0	0	0	0	0	0	0	0	0	0	0	0	0	0	0	0	0	0	0	0	0	0	0	0	0	0	0	0	0	0	0	0	0
Bacteria	Proteobacteria	Alphaproteobacteria	Rhizobiales	Xanthobacteraceae			2|1224|28211|356|335928	0	0	0	0	0	0	0	0	0	0	0	0	0	0	0	0	0	0	0	0	0	0	0	0	0	0	0	0	0	0	0	0	0	0	0	0	0	0	0	0	0	0
Bacteria	Proteobacteria	Alphaproteobacteria	Rhizobiales	Xanthobacteraceae	Pseudolabrys		2|1224|28211|356|335928|556257	0	0	0	0	0	0	0	0	0	0	0	0	0	0	0	0	0	0	0	0	0	0	0	0	0	0	0	0	0	0	0	0	0	0	0	0	0	0	0	0	0	0
Bacteria	Proteobacteria	Alphaproteobacteria	Rhizobiales	Xanthobacteraceae	Pseudolabrys	Pseudolabrys_sp_Root1462	2|1224|28211|356|335928|556257|1736466	0	0	0	0	0	0	0	0	0	0	0	0	0	0	0	0	0	0	0	0	0	0	0	0	0	0	0	0	0	0	0	0	0	0	0	0	0	0	0	0	0	0
Bacteria	Proteobacteria	Alphaproteobacteria	Rhodobacterales				2|1224|28211|204455	0	0	0	0	0	0	0	0.00251	0	0	0	0	0	3.22679	7.49096	1.79704	0	0	0	0	0	0	0	0	0	0	0.00525	0	0	0.02184	0.45131	0.00341	0.22416	0.43148	0.01794	0.14117	0.02977	0.10126	0.0192	0	0	0
Bacteria	Proteobacteria	Alphaproteobacteria	Rhodobacterales	Hyphomonadaceae			2|1224|28211|204455|69657	0	0	0	0	0	0	0	0	0	0	0	0	0	0	0	0	0	0	0	0	0	0	0	0	0	0	0	0	0	0	0	0	0	0	0	0	0	0	0	0	0	0
Bacteria	Proteobacteria	Alphaproteobacteria	Rhodobacterales	Hyphomonadaceae	Hyphomonas		2|1224|28211|204455|69657|85	0	0	0	0	0	0	0	0	0	0	0	0	0	0	0	0	0	0	0	0	0	0	0	0	0	0	0	0	0	0	0	0	0	0	0	0	0	0	0	0	0	0
Bacteria	Proteobacteria	Alphaproteobacteria	Rhodobacterales	Hyphomonadaceae	Hyphomonas	Hyphomonas_sp_34_62_18	2|1224|28211|204455|69657|85|1970392	0	0	0	0	0	0	0	0	0	0	0	0	0	0	0	0	0	0	0	0	0	0	0	0	0	0	0	0	0	0	0	0	0	0	0	0	0	0	0	0	0	0
Bacteria	Proteobacteria	Alphaproteobacteria	Rhodobacterales	Rhodobacteraceae			2|1224|28211|204455|31989	0	0	0	0	0	0	0	0.00251	0	0	0	0	0	3.22679	7.49096	1.79704	0	0	0	0	0	0	0	0	0	0	0.00525	0	0	0.02184	0.45131	0.00341	0.22416	0.43148	0.01794	0.14117	0.02977	0.10126	0.0192	0	0	0
Bacteria	Proteobacteria	Alphaproteobacteria	Rhodobacterales	Rhodobacteraceae	Haematobacter		2|1224|28211|204455|31989|366614	0	0	0	0	0	0	0	0	0	0	0	0	0	0	0	0	0	0	0	0	0	0	0	0	0	0	0	0	0	0	0	0	0	0	0	0	0	0	0	0	0	0
Bacteria	Proteobacteria	Alphaproteobacteria	Rhodobacterales	Rhodobacteraceae	Haematobacter	Haematobacter_massiliensis	2|1224|28211|204455|31989|366614|195105	0	0	0	0	0	0	0	0	0	0	0	0	0	0	0	0	0	0	0	0	0	0	0	0	0	0	0	0	0	0	0	0	0	0	0	0	0	0	0	0	0	0
Bacteria	Proteobacteria	Alphaproteobacteria	Rhodobacterales	Rhodobacteraceae	Limimaricola		2|1224|28211|204455|31989|2211638	0	0	0	0	0	0	0	0	0	0	0	0	0	0	0	0	0	0	0	0	0	0	0	0	0	0	0	0	0	0	0	0	0	0	0	0	0	0	0	0	0	0
Bacteria	Proteobacteria	Alphaproteobacteria	Rhodobacterales	Rhodobacteraceae	Limimaricola	Limimaricola_soesokkakensis	2|1224|28211|204455|31989|2211638|1343159	0	0	0	0	0	0	0	0	0	0	0	0	0	0	0	0	0	0	0	0	0	0	0	0	0	0	0	0	0	0	0	0	0	0	0	0	0	0	0	0	0	0
Bacteria	Proteobacteria	Alphaproteobacteria	Rhodobacterales	Rhodobacteraceae	Palleronia		2|1224|28211|204455|31989|315422	0	0	0	0	0	0	0	0	0	0	0	0	0	0	0	0	0	0	0	0	0	0	0	0	0	0	0	0	0	0	0	0	0	0	0	0	0	0	0	0	0	0
Bacteria	Proteobacteria	Alphaproteobacteria	Rhodobacterales	Rhodobacteraceae	Palleronia	Palleronia_marisminoris	2|1224|28211|204455|31989|315422|315423	0	0	0	0	0	0	0	0	0	0	0	0	0	0	0	0	0	0	0	0	0	0	0	0	0	0	0	0	0	0	0	0	0	0	0	0	0	0	0	0	0	0
Bacteria	Proteobacteria	Alphaproteobacteria	Rhodobacterales	Rhodobacteraceae	Pannonibacter		2|1224|28211|204455|31989|227873	0	0	0	0	0	0	0	0	0	0	0	0	0	0	0	0	0	0	0	0	0	0	0	0	0	0	0	0	0	0	0	0	0	0	0	0	0	0	0	0	0	0
Bacteria	Proteobacteria	Alphaproteobacteria	Rhodobacterales	Rhodobacteraceae	Pannonibacter	Pannonibacter_phragmitetus	2|1224|28211|204455|31989|227873|121719	0	0	0	0	0	0	0	0	0	0	0	0	0	0	0	0	0	0	0	0	0	0	0	0	0	0	0	0	0	0	0	0	0	0	0	0	0	0	0	0	0	0
Bacteria	Proteobacteria	Alphaproteobacteria	Rhodobacterales	Rhodobacteraceae	Paracoccus		2|1224|28211|204455|31989|265	0	0	0	0	0	0	0	0.00251	0	0	0	0	0	2.64063	7.49096	1.78223	0	0	0	0	0	0	0	0	0	0	0.00305	0	0	0.0158	0.3028	0.00341	0.18588	0.2658	0.015	0.07551	0.02184	0.06188	0.0087	0	0	0
Bacteria	Proteobacteria	Alphaproteobacteria	Rhodobacterales	Rhodobacteraceae	Paracoccus	Paracoccus_alcaliphilus	2|1224|28211|204455|31989|265|34002	0	0	0	0	0	0	0	0	0	0	0	0	0	0	0	0.09168	0	0	0	0	0	0	0	0	0	0	0.00305	0	0	0.01153	0.29859	0.00341	0.18222	0.13552	0.015	0.07551	0.02184	0.06188	0.0087	0	0	0
Bacteria	Proteobacteria	Alphaproteobacteria	Rhodobacterales	Rhodobacteraceae	Paracoccus	Paracoccus_alkenifer	2|1224|28211|204455|31989|265|65735	0	0	0	0	0	0	0	0	0	0	0	0	0	0	0	0.00643	0	0	0	0	0	0	0	0	0	0	0	0	0	0.00293	0.00157	0	0.00296	0.03964	0	0	0	0	0	0	0	0
Bacteria	Proteobacteria	Alphaproteobacteria	Rhodobacterales	Rhodobacteraceae	Paracoccus	Paracoccus_chinensis	2|1224|28211|204455|31989|265|525640	0	0	0	0	0	0	0	0	0	0	0	0	0	2.64063	7.49096	0.02671	0	0	0	0	0	0	0	0	0	0	0	0	0	0	0	0	0	0	0	0	0	0	0	0	0	0
Bacteria	Proteobacteria	Alphaproteobacteria	Rhodobacterales	Rhodobacteraceae	Paracoccus	Paracoccus_lutimaris	2|1224|28211|204455|31989|265|1490030	0	0	0	0	0	0	0	0	0	0	0	0	0	0	0	0	0	0	0	0	0	0	0	0	0	0	0	0	0	0	0	0	0	0	0	0	0	0	0	0	0	0
Bacteria	Proteobacteria	Alphaproteobacteria	Rhodobacterales	Rhodobacteraceae	Paracoccus	Paracoccus_pantotrophus	2|1224|28211|204455|31989|265|82367	0	0	0	0	0	0	0	0	0	0	0	0	0	0	0	0.0024	0	0	0	0	0	0	0	0	0	0	0	0	0	0	0	0	0	0	0	0	0	0	0	0	0	0
Bacteria	Proteobacteria	Alphaproteobacteria	Rhodobacterales	Rhodobacteraceae	Paracoccus	Paracoccus_sanguinis	2|1224|28211|204455|31989|265|1545044	0	0	0	0	0	0	0	0	0	0	0	0	0	0	0	0	0	0	0	0	0	0	0	0	0	0	0	0	0	0	0	0	0	0	0	0	0	0	0	0	0	0
Bacteria	Proteobacteria	Alphaproteobacteria	Rhodobacterales	Rhodobacteraceae	Paracoccus	Paracoccus_sediminis	2|1224|28211|204455|31989|265|1214787	0	0	0	0	0	0	0	0	0	0	0	0	0	0	0	0	0	0	0	0	0	0	0	0	0	0	0	0	0	0	0	0	0	0	0	0	0	0	0	0	0	0
Bacteria	Proteobacteria	Alphaproteobacteria	Rhodobacterales	Rhodobacteraceae	Paracoccus	Paracoccus_solventivorans	2|1224|28211|204455|31989|265|53463	0	0	0	0	0	0	0	0	0	0	0	0	0	0	0	1.63603	0	0	0	0	0	0	0	0	0	0	0	0	0	0.00134	0.00264	0	0.0007	0.07693	0	0	0	0	0	0	0	0
Bacteria	Proteobacteria	Alphaproteobacteria	Rhodobacterales	Rhodobacteraceae	Paracoccus	Paracoccus_sp_CBA4604	2|1224|28211|204455|31989|265|2065379	0	0	0	0	0	0	0	0	0	0	0	0	0	0	0	0	0	0	0	0	0	0	0	0	0	0	0	0	0	0	0	0	0	0.0137	0	0	0	0	0	0	0	0
Bacteria	Proteobacteria	Alphaproteobacteria	Rhodobacterales	Rhodobacteraceae	Paracoccus	Paracoccus_sp_SCN_68_21	2|1224|28211|204455|31989|265|1660154	0	0	0	0	0	0	0	0	0	0	0	0	0	0	0	0	0	0	0	0	0	0	0	0	0	0	0	0	0	0	0	0	0	0	0	0	0	0	0	0	0	0
Bacteria	Proteobacteria	Alphaproteobacteria	Rhodobacterales	Rhodobacteraceae	Paracoccus	Paracoccus_sp_WN007	2|1224|28211|204455|31989|265|2032623	0	0	0	0	0	0	0	0	0	0	0	0	0	0	0	0	0	0	0	0	0	0	0	0	0	0	0	0	0	0	0	0	0	0	0	0	0	0	0	0	0	0
Bacteria	Proteobacteria	Alphaproteobacteria	Rhodobacterales	Rhodobacteraceae	Paracoccus	Paracoccus_sphaerophysae	2|1224|28211|204455|31989|265|690417	0	0	0	0	0	0	0	0	0	0	0	0	0	0	0	0	0	0	0	0	0	0	0	0	0	0	0	0	0	0	0	0	0	0	0	0	0	0	0	0	0	0
Bacteria	Proteobacteria	Alphaproteobacteria	Rhodobacterales	Rhodobacteraceae	Paracoccus	Paracoccus_thiocyanatus	2|1224|28211|204455|31989|265|34006	0	0	0	0	0	0	0	0	0	0	0	0	0	0	0	0	0	0	0	0	0	0	0	0	0	0	0	0	0	0	0	0	0	0	0	0	0	0	0	0	0	0
Bacteria	Proteobacteria	Alphaproteobacteria	Rhodobacterales	Rhodobacteraceae	Paracoccus	Paracoccus_tibetensis	2|1224|28211|204455|31989|265|336292	0	0	0	0	0	0	0	0	0	0	0	0	0	0	0	0	0	0	0	0	0	0	0	0	0	0	0	0	0	0	0	0	0	0	0	0	0	0	0	0	0	0
Bacteria	Proteobacteria	Alphaproteobacteria	Rhodobacterales	Rhodobacteraceae	Paracoccus	Paracoccus_versutus	2|1224|28211|204455|31989|265|34007	0	0	0	0	0	0	0	0	0	0	0	0	0	0	0	0.01898	0	0	0	0	0	0	0	0	0	0	0	0	0	0	0	0	0	0	0	0	0	0	0	0	0	0
Bacteria	Proteobacteria	Alphaproteobacteria	Rhodobacterales	Rhodobacteraceae	Paracoccus	Paracoccus_yeei	2|1224|28211|204455|31989|265|147645	0	0	0	0	0	0	0	0.00251	0	0	0	0	0	0	0	0	0	0	0	0	0	0	0	0	0	0	0	0	0	0	0	0	0	0	0	0	0	0	0	0	0	0
Bacteria	Proteobacteria	Alphaproteobacteria	Rhodobacterales	Rhodobacteraceae	Pontibaca		2|1224|28211|204455|31989|1400059	0	0	0	0	0	0	0	0	0	0	0	0	0	0	0	0.01481	0	0	0	0	0	0	0	0	0	0	0.0022	0	0	0.00604	0.14851	0	0.03828	0.16568	0.00294	0.06566	0.00794	0.03937	0.01051	0	0	0
Bacteria	Proteobacteria	Alphaproteobacteria	Rhodobacterales	Rhodobacteraceae	Pontibaca	Pontibaca_methylaminivorans	2|1224|28211|204455|31989|1400059|515897	0	0	0	0	0	0	0	0	0	0	0	0	0	0	0	0.01481	0	0	0	0	0	0	0	0	0	0	0.0022	0	0	0.00604	0.14851	0	0.03828	0.16568	0.00294	0.06566	0.00794	0.03937	0.01051	0	0	0
Bacteria	Proteobacteria	Alphaproteobacteria	Rhodobacterales	Rhodobacteraceae	Pseudorhodobacter		2|1224|28211|204455|31989|238783	0	0	0	0	0	0	0	0	0	0	0	0	0	0	0	0	0	0	0	0	0	0	0	0	0	0	0	0	0	0	0	0	0	0	0	0	0	0	0	0	0	0
Bacteria	Proteobacteria	Alphaproteobacteria	Rhodobacterales	Rhodobacteraceae	Pseudorhodobacter	Pseudorhodobacter_sp_MZDSW_24AT	2|1224|28211|204455|31989|238783|2052957	0	0	0	0	0	0	0	0	0	0	0	0	0	0	0	0	0	0	0	0	0	0	0	0	0	0	0	0	0	0	0	0	0	0	0	0	0	0	0	0	0	0
Bacteria	Proteobacteria	Alphaproteobacteria	Rhodobacterales	Rhodobacteraceae	Rhodobacter		2|1224|28211|204455|31989|1060	0	0	0	0	0	0	0	0	0	0	0	0	0	0.58617	0	0	0	0	0	0	0	0	0	0	0	0	0	0	0	0	0	0	0	0	0	0	0	0	0	0	0	0
Bacteria	Proteobacteria	Alphaproteobacteria	Rhodobacterales	Rhodobacteraceae	Rhodobacter	Rhodobacter_capsulatus	2|1224|28211|204455|31989|1060|1061	0	0	0	0	0	0	0	0	0	0	0	0	0	0	0	0	0	0	0	0	0	0	0	0	0	0	0	0	0	0	0	0	0	0	0	0	0	0	0	0	0	0
Bacteria	Proteobacteria	Alphaproteobacteria	Rhodobacterales	Rhodobacteraceae	Rhodobacter	Rhodobacter_johrii	2|1224|28211|204455|31989|1060|445629	0	0	0	0	0	0	0	0	0	0	0	0	0	0.58617	0	0	0	0	0	0	0	0	0	0	0	0	0	0	0	0	0	0	0	0	0	0	0	0	0	0	0	0
Bacteria	Proteobacteria	Alphaproteobacteria	Rhodobacterales	Rhodobacteraceae	Rhodobacter	Rhodobacter_megalophilus	2|1224|28211|204455|31989|1060|418630	0	0	0	0	0	0	0	0	0	0	0	0	0	0	0	0	0	0	0	0	0	0	0	0	0	0	0	0	0	0	0	0	0	0	0	0	0	0	0	0	0	0
Bacteria	Proteobacteria	Alphaproteobacteria	Rhodobacterales	Rhodobacteraceae	Rhodobacter	Rhodobacter_sphaeroides	2|1224|28211|204455|31989|1060|1063	0	0	0	0	0	0	0	0	0	0	0	0	0	0	0	0	0	0	0	0	0	0	0	0	0	0	0	0	0	0	0	0	0	0	0	0	0	0	0	0	0	0
Bacteria	Proteobacteria	Alphaproteobacteria	Rhodobacterales	Rhodobacteraceae	Rubellimicrobium		2|1224|28211|204455|31989|295418	0	0	0	0	0	0	0	0	0	0	0	0	0	0	0	0	0	0	0	0	0	0	0	0	0	0	0	0	0	0	0	0	0	0	0	0	0	0	0	0	0	0
Bacteria	Proteobacteria	Alphaproteobacteria	Rhodobacterales	Rhodobacteraceae	Rubellimicrobium	Rubellimicrobium_mesophilum	2|1224|28211|204455|31989|295418|1123067	0	0	0	0	0	0	0	0	0	0	0	0	0	0	0	0	0	0	0	0	0	0	0	0	0	0	0	0	0	0	0	0	0	0	0	0	0	0	0	0	0	0
Bacteria	Proteobacteria	Alphaproteobacteria	Rhodobacterales	Rhodobacteraceae	Silicimonas		2|1224|28211|204455|31989|1955420	0	0	0	0	0	0	0	0	0	0	0	0	0	0	0	0	0	0	0	0	0	0	0	0	0	0	0	0	0	0	0	0	0	0	0	0	0	0	0	0	0	0
Bacteria	Proteobacteria	Alphaproteobacteria	Rhodobacterales	Rhodobacteraceae	Silicimonas	Silicimonas_algicola	2|1224|28211|204455|31989|1955420|1826607	0	0	0	0	0	0	0	0	0	0	0	0	0	0	0	0	0	0	0	0	0	0	0	0	0	0	0	0	0	0	0	0	0	0	0	0	0	0	0	0	0	0
Bacteria	Proteobacteria	Alphaproteobacteria	Rhodospirillales				2|1224|28211|204441	0	0	0	0	0	0	0	0	0	0	0	0	0.05065	3.78517	0.04276	0	0	4.41858	0	0	0	0	0	0	0	0	0	0	0	0	0	0	0	0	0	0	0	0	0	0	0	0
Bacteria	Proteobacteria	Alphaproteobacteria	Rhodospirillales	Acetobacteraceae			2|1224|28211|204441|433	0	0	0	0	0	0	0	0	0	0	0	0	0	1.01854	0	0	0	0	0	0	0	0	0	0	0	0	0	0	0	0	0	0	0	0	0	0	0	0	0	0	0	0
Bacteria	Proteobacteria	Alphaproteobacteria	Rhodospirillales	Acetobacteraceae	Belnapia		2|1224|28211|204441|433|365532	0	0	0	0	0	0	0	0	0	0	0	0	0	1.01854	0	0	0	0	0	0	0	0	0	0	0	0	0	0	0	0	0	0	0	0	0	0	0	0	0	0	0	0
Bacteria	Proteobacteria	Alphaproteobacteria	Rhodospirillales	Acetobacteraceae	Belnapia	Belnapia_rosea	2|1224|28211|204441|433|365532|938405	0	0	0	0	0	0	0	0	0	0	0	0	0	1.01854	0	0	0	0	0	0	0	0	0	0	0	0	0	0	0	0	0	0	0	0	0	0	0	0	0	0	0	0
Bacteria	Proteobacteria	Alphaproteobacteria	Rhodospirillales	Rhodospirillaceae			2|1224|28211|204441|41295	0	0	0	0	0	0	0	0	0	0	0	0	0.05065	2.76662	0	0	0	0	0	0	0	0	0	0	0	0	0	0	0	0	0	0	0	0	0	0	0	0	0	0	0	0
Bacteria	Proteobacteria	Alphaproteobacteria	Rhodospirillales	Rhodospirillaceae	Inquilinus		2|1224|28211|204441|41295|171673	0	0	0	0	0	0	0	0	0	0	0	0	0	0	0	0	0	0	0	0	0	0	0	0	0	0	0	0	0	0	0	0	0	0	0	0	0	0	0	0	0	0
Bacteria	Proteobacteria	Alphaproteobacteria	Rhodospirillales	Rhodospirillaceae	Inquilinus	Inquilinus_limosus	2|1224|28211|204441|41295|171673|171674	0	0	0	0	0	0	0	0	0	0	0	0	0	0	0	0	0	0	0	0	0	0	0	0	0	0	0	0	0	0	0	0	0	0	0	0	0	0	0	0	0	0
Bacteria	Proteobacteria	Alphaproteobacteria	Rhodospirillales	Rhodospirillaceae	Insolitispirillum		2|1224|28211|204441|41295|660628	0	0	0	0	0	0	0	0	0	0	0	0	0	0	0	0	0	0	0	0	0	0	0	0	0	0	0	0	0	0	0	0	0	0	0	0	0	0	0	0	0	0
Bacteria	Proteobacteria	Alphaproteobacteria	Rhodospirillales	Rhodospirillaceae	Insolitispirillum	Insolitispirillum_peregrinum	2|1224|28211|204441|41295|660628|80876	0	0	0	0	0	0	0	0	0	0	0	0	0	0	0	0	0	0	0	0	0	0	0	0	0	0	0	0	0	0	0	0	0	0	0	0	0	0	0	0	0	0
Bacteria	Proteobacteria	Alphaproteobacteria	Rhodospirillales	Rhodospirillaceae	Skermanella		2|1224|28211|204441|41295|204447	0	0	0	0	0	0	0	0	0	0	0	0	0.05065	2.76662	0	0	0	0	0	0	0	0	0	0	0	0	0	0	0	0	0	0	0	0	0	0	0	0	0	0	0	0
Bacteria	Proteobacteria	Alphaproteobacteria	Rhodospirillales	Rhodospirillaceae	Skermanella	Skermanella_aerolata	2|1224|28211|204441|41295|204447|393310	0	0	0	0	0	0	0	0	0	0	0	0	0.05065	2.76662	0	0	0	0	0	0	0	0	0	0	0	0	0	0	0	0	0	0	0	0	0	0	0	0	0	0	0	0
Bacteria	Proteobacteria	Alphaproteobacteria	Rhodospirillales	Rhodospirillales_unclassified				0	0	0	0	0	0	0	0	0	0	0	0	0	0	0.04276	0	0	4.41858	0	0	0	0	0	0	0	0	0	0	0	0	0	0	0	0	0	0	0	0	0	0	0	0
Bacteria	Proteobacteria	Alphaproteobacteria	Rhodospirillales	Rhodospirillales_unclassified			2|1224|28211|204441|	0	0	0	0	0	0	0	0	0	0	0	0	0	0	0	0	0	0	0	0	0	0	0	0	0	0	0	0	0	0	0	0	0	0	0	0	0	0	0	0	0	0
Bacteria	Proteobacteria	Alphaproteobacteria	Rhodospirillales	Rhodospirillales_unclassified	Enhydrobacter		2|1224|28211|204441||212791	0	0	0	0	0	0	0	0	0	0	0	0	0	0	0	0	0	4.41858	0	0	0	0	0	0	0	0	0	0	0	0	0	0	0	0	0	0	0	0	0	0	0	0
Bacteria	Proteobacteria	Alphaproteobacteria	Rhodospirillales	Rhodospirillales_unclassified	Enhydrobacter	Enhydrobacter_aerosaccus	2|1224|28211|204441||212791|225324	0	0	0	0	0	0	0	0	0	0	0	0	0	0	0	0	0	4.41858	0	0	0	0	0	0	0	0	0	0	0	0	0	0	0	0	0	0	0	0	0	0	0	0
Bacteria	Proteobacteria	Alphaproteobacteria	Rhodospirillales	Rhodospirillales_unclassified	Rhodospirillales_unclassified			0	0	0	0	0	0	0	0	0	0	0	0	0	0	0.04276	0	0	0	0	0	0	0	0	0	0	0	0	0	0	0	0	0	0	0	0	0	0	0	0	0	0	0
Bacteria	Proteobacteria	Alphaproteobacteria	Rhodospirillales	Rhodospirillales_unclassified	Rhodospirillales_unclassified		2|1224|28211|204441||	0	0	0	0	0	0	0	0	0	0	0	0	0	0	0	0	0	0	0	0	0	0	0	0	0	0	0	0	0	0	0	0	0	0	0	0	0	0	0	0	0	0
Bacteria	Proteobacteria	Alphaproteobacteria	Rhodospirillales	Rhodospirillales_unclassified	Rhodospirillales_unclassified	Rhodospirillales_bacterium_URHD0017	2|1224|28211|204441|||1380357	0	0	0	0	0	0	0	0	0	0	0	0	0	0	0.04276	0	0	0	0	0	0	0	0	0	0	0	0	0	0	0	0	0	0	0	0	0	0	0	0	0	0	0
Bacteria	Proteobacteria	Alphaproteobacteria	Rickettsiales				2|1224|28211|766	0	0	0	0	0	0	0	0	0	0	0	0	0	0	0	0	0	0	0	0	0	0	0	0	0	0	0	0	0	0	0	0	0	0	0	0	0	0	0	0	0	0
Bacteria	Proteobacteria	Alphaproteobacteria	Rickettsiales	Rickettsiaceae			2|1224|28211|766|775	0	0	0	0	0	0	0	0	0	0	0	0	0	0	0	0	0	0	0	0	0	0	0	0	0	0	0	0	0	0	0	0	0	0	0	0	0	0	0	0	0	0
Bacteria	Proteobacteria	Alphaproteobacteria	Rickettsiales	Rickettsiaceae	Rickettsia		2|1224|28211|766|775|780	0	0	0	0	0	0	0	0	0	0	0	0	0	0	0	0	0	0	0	0	0	0	0	0	0	0	0	0	0	0	0	0	0	0	0	0	0	0	0	0	0	0
Bacteria	Proteobacteria	Alphaproteobacteria	Rickettsiales	Rickettsiaceae	Rickettsia	Rickettsia_felis	2|1224|28211|766|775|780|42862	0	0	0	0	0	0	0	0	0	0	0	0	0	0	0	0	0	0	0	0	0	0	0	0	0	0	0	0	0	0	0	0	0	0	0	0	0	0	0	0	0	0
Bacteria	Proteobacteria	Alphaproteobacteria	Sphingomonadales				2|1224|28211|204457	0	0	0	0	0	0	0	0	0	0	0.11661	0.19086	0.45565	2.59571	2.86065	0.08955	0	0	0	0	0	0	0	0	0	0	0	0	0	0	0	0	0	0	0	0	0	0	0	0	3.12069	0.05802
Bacteria	Proteobacteria	Alphaproteobacteria	Sphingomonadales	Erythrobacteraceae			2|1224|28211|204457|335929	0	0	0	0	0	0	0	0	0	0	0	0	0	2.09453	2.2268	0	0	0	0	0	0	0	0	0	0	0	0	0	0	0	0	0	0	0	0	0	0	0	0	0	0	0
Bacteria	Proteobacteria	Alphaproteobacteria	Sphingomonadales	Erythrobacteraceae	Erythrobacter		2|1224|28211|204457|335929|1041	0	0	0	0	0	0	0	0	0	0	0	0	0	0	0	0	0	0	0	0	0	0	0	0	0	0	0	0	0	0	0	0	0	0	0	0	0	0	0	0	0	0
Bacteria	Proteobacteria	Alphaproteobacteria	Sphingomonadales	Erythrobacteraceae	Erythrobacter	Erythrobacter_xanthus	2|1224|28211|204457|335929|1041|1784712	0	0	0	0	0	0	0	0	0	0	0	0	0	0	0	0	0	0	0	0	0	0	0	0	0	0	0	0	0	0	0	0	0	0	0	0	0	0	0	0	0	0
Bacteria	Proteobacteria	Alphaproteobacteria	Sphingomonadales	Erythrobacteraceae	Porphyrobacter		2|1224|28211|204457|335929|1111	0	0	0	0	0	0	0	0	0	0	0	0	0	2.09453	2.2268	0	0	0	0	0	0	0	0	0	0	0	0	0	0	0	0	0	0	0	0	0	0	0	0	0	0	0
Bacteria	Proteobacteria	Alphaproteobacteria	Sphingomonadales	Erythrobacteraceae	Porphyrobacter	Porphyrobacter_neustonensis	2|1224|28211|204457|335929|1111|1112	0	0	0	0	0	0	0	0	0	0	0	0	0	0	0	0	0	0	0	0	0	0	0	0	0	0	0	0	0	0	0	0	0	0	0	0	0	0	0	0	0	0
Bacteria	Proteobacteria	Alphaproteobacteria	Sphingomonadales	Erythrobacteraceae	Porphyrobacter	Porphyrobacter_sp_CACIAM_03H1	2|1224|28211|204457|335929|1111|2003315	0	0	0	0	0	0	0	0	0	0	0	0	0	2.09453	2.2268	0	0	0	0	0	0	0	0	0	0	0	0	0	0	0	0	0	0	0	0	0	0	0	0	0	0	0
Bacteria	Proteobacteria	Alphaproteobacteria	Sphingomonadales	Sphingomonadaceae			2|1224|28211|204457|41297	0	0	0	0	0	0	0	0	0	0	0.11661	0.19086	0.45565	0.50118	0.63386	0.08955	0	0	0	0	0	0	0	0	0	0	0	0	0	0	0	0	0	0	0	0	0	0	0	0	3.12069	0.05802
Bacteria	Proteobacteria	Alphaproteobacteria	Sphingomonadales	Sphingomonadaceae	Blastomonas		2|1224|28211|204457|41297|150203	0	0	0	0	0	0	0	0	0	0	0	0	0	0	0	0	0	0	0	0	0	0	0	0	0	0	0	0	0	0	0	0	0	0	0	0	0	0	0	0	0	0
Bacteria	Proteobacteria	Alphaproteobacteria	Sphingomonadales	Sphingomonadaceae	Blastomonas	Blastomonas_sp	2|1224|28211|204457|41297|150203|1909299	0	0	0	0	0	0	0	0	0	0	0	0	0	0	0	0	0	0	0	0	0	0	0	0	0	0	0	0	0	0	0	0	0	0	0	0	0	0	0	0	0	0
Bacteria	Proteobacteria	Alphaproteobacteria	Sphingomonadales	Sphingomonadaceae	Sphingobium		2|1224|28211|204457|41297|165695	0	0	0	0	0	0	0	0	0	0	0	0	0	0	0	0	0	0	0	0	0	0	0	0	0	0	0	0	0	0	0	0	0	0	0	0	0	0	0	0	0	0
Bacteria	Proteobacteria	Alphaproteobacteria	Sphingomonadales	Sphingomonadaceae	Sphingobium	Sphingobium_yanoikuyae	2|1224|28211|204457|41297|165695|13690	0	0	0	0	0	0	0	0	0	0	0	0	0	0	0	0	0	0	0	0	0	0	0	0	0	0	0	0	0	0	0	0	0	0	0	0	0	0	0	0	0	0
Bacteria	Proteobacteria	Alphaproteobacteria	Sphingomonadales	Sphingomonadaceae	Sphingomonas		2|1224|28211|204457|41297|13687	0	0	0	0	0	0	0	0	0	0	0.11661	0.19086	0.23087	0.50118	0	0.01095	0	0	0	0	0	0	0	0	0	0	0	0	0	0	0	0	0	0	0	0	0	0	0	0	3.12069	0.05802
Bacteria	Proteobacteria	Alphaproteobacteria	Sphingomonadales	Sphingomonadaceae	Sphingomonas	Sphingomonas_hankookensis	2|1224|28211|204457|41297|13687|563996	0	0	0	0	0	0	0	0	0	0	0	0	0	0	0	0	0	0	0	0	0	0	0	0	0	0	0	0	0	0	0	0	0	0	0	0	0	0	0	0	0	0
Bacteria	Proteobacteria	Alphaproteobacteria	Sphingomonadales	Sphingomonadaceae	Sphingomonas	Sphingomonas_indica	2|1224|28211|204457|41297|13687|941907	0	0	0	0	0	0	0	0	0	0	0	0	0	0.07419	0	0	0	0	0	0	0	0	0	0	0	0	0	0	0	0	0	0	0	0	0	0	0	0	0	0	0	0
Bacteria	Proteobacteria	Alphaproteobacteria	Sphingomonadales	Sphingomonadaceae	Sphingomonas	Sphingomonas_koreensis	2|1224|28211|204457|41297|13687|93064	0	0	0	0	0	0	0	0	0	0	0	0	0	0	0	0	0	0	0	0	0	0	0	0	0	0	0	0	0	0	0	0	0	0	0	0	0	0	0	0	0	0
Bacteria	Proteobacteria	Alphaproteobacteria	Sphingomonadales	Sphingomonadaceae	Sphingomonas	Sphingomonas_laterariae	2|1224|28211|204457|41297|13687|861865	0	0	0	0	0	0	0	0	0	0	0	0	0	0	0	0	0	0	0	0	0	0	0	0	0	0	0	0	0	0	0	0	0	0	0	0	0	0	0	0	0	0
Bacteria	Proteobacteria	Alphaproteobacteria	Sphingomonadales	Sphingomonadaceae	Sphingomonas	Sphingomonas_rubra	2|1224|28211|204457|41297|13687|634430	0	0	0	0	0	0	0	0	0	0	0	0	0	0	0	0.01095	0	0	0	0	0	0	0	0	0	0	0	0	0	0	0	0	0	0	0	0	0	0	0	0	0	0
Bacteria	Proteobacteria	Alphaproteobacteria	Sphingomonadales	Sphingomonadaceae	Sphingomonas	Sphingomonas_sanguinis	2|1224|28211|204457|41297|13687|33051	0	0	0	0	0	0	0	0	0	0	0	0	0	0	0	0	0	0	0	0	0	0	0	0	0	0	0	0	0	0	0	0	0	0	0	0	0	0	0	0	0	0
Bacteria	Proteobacteria	Alphaproteobacteria	Sphingomonadales	Sphingomonadaceae	Sphingomonas	Sphingomonas_sp_FARSPH	2|1224|28211|204457|41297|13687|2219696	0	0	0	0	0	0	0	0	0	0	0.11661	0	0	0	0	0	0	0	0	0	0	0	0	0	0	0	0	0	0	0	0	0	0	0	0	0	0	0	0	0	3.12069	0.05802
Bacteria	Proteobacteria	Alphaproteobacteria	Sphingomonadales	Sphingomonadaceae	Sphingomonas	Sphingomonas_sp_Leaf10	2|1224|28211|204457|41297|13687|1735676	0	0	0	0	0	0	0	0	0	0	0	0	0.23087	0	0	0	0	0	0	0	0	0	0	0	0	0	0	0	0	0	0	0	0	0	0	0	0	0	0	0	0	0
Bacteria	Proteobacteria	Alphaproteobacteria	Sphingomonadales	Sphingomonadaceae	Sphingomonas	Sphingomonas_sp_SCN_67_18	2|1224|28211|204457|41297|13687|1660141	0	0	0	0	0	0	0	0	0	0	0	0.19086	0	0	0	0	0	0	0	0	0	0	0	0	0	0	0	0	0	0	0	0	0	0	0	0	0	0	0	0	0	0
Bacteria	Proteobacteria	Alphaproteobacteria	Sphingomonadales	Sphingomonadaceae	Sphingomonas	Sphingomonas_spermidinifaciens	2|1224|28211|204457|41297|13687|1141889	0	0	0	0	0	0	0	0	0	0	0	0	0	0.427	0	0	0	0	0	0	0	0	0	0	0	0	0	0	0	0	0	0	0	0	0	0	0	0	0	0	0	0
Bacteria	Proteobacteria	Alphaproteobacteria	Sphingomonadales	Sphingomonadaceae	Sphingopyxis		2|1224|28211|204457|41297|165697	0	0	0	0	0	0	0	0	0	0	0	0	0.22478	0	0.63386	0	0	0	0	0	0	0	0	0	0	0	0	0	0	0	0	0	0	0	0	0	0	0	0	0	0	0
Bacteria	Proteobacteria	Alphaproteobacteria	Sphingomonadales	Sphingomonadaceae	Sphingopyxis	Sphingopyxis_flava	2|1224|28211|204457|41297|165697|1507287	0	0	0	0	0	0	0	0	0	0	0	0	0	0	0	0	0	0	0	0	0	0	0	0	0	0	0	0	0	0	0	0	0	0	0	0	0	0	0	0	0	0
Bacteria	Proteobacteria	Alphaproteobacteria	Sphingomonadales	Sphingomonadaceae	Sphingopyxis	Sphingopyxis_granuli	2|1224|28211|204457|41297|165697|267128	0	0	0	0	0	0	0	0	0	0	0	0	0	0	0	0	0	0	0	0	0	0	0	0	0	0	0	0	0	0	0	0	0	0	0	0	0	0	0	0	0	0
Bacteria	Proteobacteria	Alphaproteobacteria	Sphingomonadales	Sphingomonadaceae	Sphingopyxis	Sphingopyxis_macrogoltabida	2|1224|28211|204457|41297|165697|33050	0	0	0	0	0	0	0	0	0	0	0	0	0.01068	0	0	0	0	0	0	0	0	0	0	0	0	0	0	0	0	0	0	0	0	0	0	0	0	0	0	0	0	0
Bacteria	Proteobacteria	Alphaproteobacteria	Sphingomonadales	Sphingomonadaceae	Sphingopyxis	Sphingopyxis_sp_113P3	2|1224|28211|204457|41297|165697|292913	0	0	0	0	0	0	0	0	0	0	0	0	0	0	0	0	0	0	0	0	0	0	0	0	0	0	0	0	0	0	0	0	0	0	0	0	0	0	0	0	0	0
Bacteria	Proteobacteria	Alphaproteobacteria	Sphingomonadales	Sphingomonadaceae	Sphingopyxis	Sphingopyxis_sp_C_1	2|1224|28211|204457|41297|165697|262667	0	0	0	0	0	0	0	0	0	0	0	0	0.09412	0	0.63386	0	0	0	0	0	0	0	0	0	0	0	0	0	0	0	0	0	0	0	0	0	0	0	0	0	0	0
Bacteria	Proteobacteria	Alphaproteobacteria	Sphingomonadales	Sphingomonadaceae	Sphingopyxis	Sphingopyxis_sp_H115	2|1224|28211|204457|41297|165697|1759073	0	0	0	0	0	0	0	0	0	0	0	0	0	0	0	0	0	0	0	0	0	0	0	0	0	0	0	0	0	0	0	0	0	0	0	0	0	0	0	0	0	0
Bacteria	Proteobacteria	Alphaproteobacteria	Sphingomonadales	Sphingomonadaceae	Sphingopyxis	Sphingopyxis_sp_LC363	2|1224|28211|204457|41297|165697|1120705	0	0	0	0	0	0	0	0	0	0	0	0	0.11999	0	0	0	0	0	0	0	0	0	0	0	0	0	0	0	0	0	0	0	0	0	0	0	0	0	0	0	0	0
Bacteria	Proteobacteria	Alphaproteobacteria	Sphingomonadales	Sphingomonadaceae	Sphingopyxis	Sphingopyxis_sp_RIFCSPHIGHO2_12_FULL_65_19	2|1224|28211|204457|41297|165697|1802172	0	0	0	0	0	0	0	0	0	0	0	0	0	0	0	0	0	0	0	0	0	0	0	0	0	0	0	0	0	0	0	0	0	0	0	0	0	0	0	0	0	0
Bacteria	Proteobacteria	Alphaproteobacteria	Sphingomonadales	Sphingomonadaceae	Sphingosinicella		2|1224|28211|204457|41297|335405	0	0	0	0	0	0	0	0	0	0	0	0	0	0	0	0.0786	0	0	0	0	0	0	0	0	0	0	0	0	0	0	0	0	0	0	0	0	0	0	0	0	0	0
Bacteria	Proteobacteria	Alphaproteobacteria	Sphingomonadales	Sphingomonadaceae	Sphingosinicella	Sphingosinicella_sp_GL_C_18	2|1224|28211|204457|41297|335405|2116704	0	0	0	0	0	0	0	0	0	0	0	0	0	0	0	0	0	0	0	0	0	0	0	0	0	0	0	0	0	0	0	0	0	0	0	0	0	0	0	0	0	0
Bacteria	Proteobacteria	Alphaproteobacteria	Sphingomonadales	Sphingomonadaceae	Sphingosinicella	Sphingosinicella_sp_QZX222	2|1224|28211|204457|41297|335405|2068657	0	0	0	0	0	0	0	0	0	0	0	0	0	0	0	0.0786	0	0	0	0	0	0	0	0	0	0	0	0	0	0	0	0	0	0	0	0	0	0	0	0	0	0
Bacteria	Proteobacteria	Betaproteobacteria					2|1224|28216	0.41392	0.41392	0.03131	0.02393	0.08217	0.14305	0.10309	0.09415	0.08388	0.10714	7.63982	0.80364	8.45791	3.84577	3.07941	3.88756	0	0	0	0	0	0	0	0	0.02054	0.29519	0.38004	0.0115	0.00191	0.24976	0.26578	0.07302	4.58446	12.24486	0.77202	2.35005	0.2161	13.61506	2.17948	0	0	0
Bacteria	Proteobacteria	Betaproteobacteria	Betaproteobacteria_unclassified					0	0	0	0	0	0	0	0	0	0	0	0	0	0	0	0	0	0	0	0	0	0	0	0	0	0	0	0	0	0	0	0	0	0	0	0	0	0	0	0	0	0
Bacteria	Proteobacteria	Betaproteobacteria	Betaproteobacteria_unclassified				2|1224|28216|	0	0	0	0	0	0	0	0	0	0	0	0	0	0	0	0	0	0	0	0	0	0	0	0	0	0	0	0	0	0	0	0	0	0	0	0	0	0	0	0	0	0
Bacteria	Proteobacteria	Betaproteobacteria	Betaproteobacteria_unclassified	Betaproteobacteria_unclassified				0	0	0	0	0	0	0	0	0	0	0	0	0	0	0	0	0	0	0	0	0	0	0	0	0	0	0	0	0	0	0	0	0	0	0	0	0	0	0	0	0	0
Bacteria	Proteobacteria	Betaproteobacteria	Betaproteobacteria_unclassified	Betaproteobacteria_unclassified			2|1224|28216||	0	0	0	0	0	0	0	0	0	0	0	0	0	0	0	0	0	0	0	0	0	0	0	0	0	0	0	0	0	0	0	0	0	0	0	0	0	0	0	0	0	0
Bacteria	Proteobacteria	Betaproteobacteria	Betaproteobacteria_unclassified	Betaproteobacteria_unclassified	Betaproteobacteria_unclassified			0	0	0	0	0	0	0	0	0	0	0	0	0	0	0	0	0	0	0	0	0	0	0	0	0	0	0	0	0	0	0	0	0	0	0	0	0	0	0	0	0	0
Bacteria	Proteobacteria	Betaproteobacteria	Betaproteobacteria_unclassified	Betaproteobacteria_unclassified	Betaproteobacteria_unclassified		2|1224|28216|||	0	0	0	0	0	0	0	0	0	0	0	0	0	0	0	0	0	0	0	0	0	0	0	0	0	0	0	0	0	0	0	0	0	0	0	0	0	0	0	0	0	0
Bacteria	Proteobacteria	Betaproteobacteria	Betaproteobacteria_unclassified	Betaproteobacteria_unclassified	Betaproteobacteria_unclassified	Betaproteobacteria_bacterium_HGW_Betaproteobacteria_16	2|1224|28216||||2013707	0	0	0	0	0	0	0	0	0	0	0	0	0	0	0	0	0	0	0	0	0	0	0	0	0	0	0	0	0	0	0	0	0	0	0	0	0	0	0	0	0	0
Bacteria	Proteobacteria	Betaproteobacteria	Betaproteobacteria_unclassified	Betaproteobacteria_unclassified	Candidatus_Accumulibacter		2|1224|28216|||327159	0	0	0	0	0	0	0	0	0	0	0	0	0	0	0	0	0	0	0	0	0	0	0	0	0	0	0	0	0	0	0	0	0	0	0	0	0	0	0	0	0	0
Bacteria	Proteobacteria	Betaproteobacteria	Betaproteobacteria_unclassified	Betaproteobacteria_unclassified	Candidatus_Accumulibacter	Candidatus_Accumulibacter_sp_66_26	2|1224|28216|||327159|1895689	0	0	0	0	0	0	0	0	0	0	0	0	0	0	0	0	0	0	0	0	0	0	0	0	0	0	0	0	0	0	0	0	0	0	0	0	0	0	0	0	0	0
Bacteria	Proteobacteria	Betaproteobacteria	Burkholderiales				2|1224|28216|80840	0.41392	0.41392	0.03131	0.02393	0.08217	0.14305	0.10309	0.09415	0.08388	0.10714	7.63982	0.80364	6.45002	1.39168	0.48016	3.5483	0	0	0	0	0	0	0	0	0.02054	0.29519	0.38004	0.0115	0.00191	0.24976	0.26578	0.07302	4.58446	12.24486	0.77202	2.35005	0.2161	13.61506	2.17948	0	0	0
Bacteria	Proteobacteria	Betaproteobacteria	Burkholderiales	Alcaligenaceae			2|1224|28216|80840|506	0	0	0	0	0.0045	0.11254	0.04985	0.06626	0.06381	0.03638	7.18513	0.27405	0.60417	0	0	2.9719	0	0	0	0	0	0	0	0	0.01899	0.29371	0.38004	0.0115	0	0.24976	0.26578	0.07302	4.58446	12.24486	0.77202	2.35005	0.2161	13.61506	2.17948	0	0	0
Bacteria	Proteobacteria	Betaproteobacteria	Burkholderiales	Alcaligenaceae	Achromobacter		2|1224|28216|80840|506|222	0	0	0	0	0	0	0	0	0	0	7.18513	0.27405	0.1271	0	0	0.00105	0	0	0	0	0	0	0	0	0	0	0	0	0	0	0	0.00169	0	0	0	0	0	0	0	0	0	0
Bacteria	Proteobacteria	Betaproteobacteria	Burkholderiales	Alcaligenaceae	Achromobacter	Achromobacter_denitrificans	2|1224|28216|80840|506|222|32002	0	0	0	0	0	0	0	0	0	0	0	0	0	0	0	0	0	0	0	0	0	0	0	0	0	0	0	0	0	0	0	0	0	0	0	0	0	0	0	0	0	0
Bacteria	Proteobacteria	Betaproteobacteria	Burkholderiales	Alcaligenaceae	Achromobacter	Achromobacter_insolitus	2|1224|28216|80840|506|222|217204	0	0	0	0	0	0	0	0	0	0	0	0	0.1271	0	0	0	0	0	0	0	0	0	0	0	0	0	0	0	0	0	0	0	0	0	0	0	0	0	0	0	0	0
Bacteria	Proteobacteria	Betaproteobacteria	Burkholderiales	Alcaligenaceae	Achromobacter	Achromobacter_mucicolens	2|1224|28216|80840|506|222|1389922	0	0	0	0	0	0	0	0	0	0	0	0	0	0	0	0.00105	0	0	0	0	0	0	0	0	0	0	0	0	0	0	0	0	0	0	0	0	0	0	0	0	0	0
Bacteria	Proteobacteria	Betaproteobacteria	Burkholderiales	Alcaligenaceae	Achromobacter	Achromobacter_pulmonis	2|1224|28216|80840|506|222|1389932	0	0	0	0	0	0	0	0	0	0	0	0	0	0	0	0	0	0	0	0	0	0	0	0	0	0	0	0	0	0	0	0	0	0	0	0	0	0	0	0	0	0
Bacteria	Proteobacteria	Betaproteobacteria	Burkholderiales	Alcaligenaceae	Achromobacter	Achromobacter_spanius	2|1224|28216|80840|506|222|217203	0	0	0	0	0	0	0	0	0	0	0	0	0	0	0	0	0	0	0	0	0	0	0	0	0	0	0	0	0	0	0	0	0	0	0	0	0	0	0	0	0	0
Bacteria	Proteobacteria	Betaproteobacteria	Burkholderiales	Alcaligenaceae	Achromobacter	Achromobacter_xylosoxidans	2|1224|28216|80840|506|222|85698	0	0	0	0	0	0	0	0	0	0	7.18513	0.27405	0	0	0	0	0	0	0	0	0	0	0	0	0	0	0	0	0	0	0	0.00169	0	0	0	0	0	0	0	0	0	0
Bacteria	Proteobacteria	Betaproteobacteria	Burkholderiales	Alcaligenaceae	Alcaligenes		2|1224|28216|80840|506|507	0	0	0	0	0	0.03832	0.00685	0.01135	0.04038	0.00433	0	0	0.47707	0	0	0.19173	0	0	0	0	0	0	0	0	0.00113	0.05331	0.00358	0	0	0.08181	0.11405	0.03563	0.75307	1.1387	0.16111	0.55384	0.02434	0.86186	0.2629	0	0	0
Bacteria	Proteobacteria	Betaproteobacteria	Burkholderiales	Alcaligenaceae	Alcaligenes	Alcaligenes_aquatilis	2|1224|28216|80840|506|507|323284	0	0	0	0	0	0	0	0	0	0	0	0	0	0	0	0	0	0	0	0	0	0	0	0	0	0	0	0	0	0	0	0	0.00508	0.03411	0	0.00376	0	0	0	0	0	0
Bacteria	Proteobacteria	Betaproteobacteria	Burkholderiales	Alcaligenaceae	Alcaligenes	Alcaligenes_faecalis	2|1224|28216|80840|506|507|511	0	0	0	0	0	0.03832	0.00685	0.01135	0.04038	0.00433	0	0	0.47707	0	0	0.19173	0	0	0	0	0	0	0	0	0.00113	0.05331	0.00358	0	0	0.08181	0.11405	0.03563	0.74799	1.10459	0.16111	0.55008	0.02434	0.86186	0.2629	0	0	0
Bacteria	Proteobacteria	Betaproteobacteria	Burkholderiales	Alcaligenaceae	Bordetella		2|1224|28216|80840|506|517	0	0	0	0	0	0	0	0	0	0	0	0	0	0	0	0.59835	0	0	0	0	0	0	0	0	0	0	0	0	0	0	0	0	0	0	0	0	0	0	0	0	0	0
Bacteria	Proteobacteria	Betaproteobacteria	Burkholderiales	Alcaligenaceae	Bordetella	Bordetella_avium	2|1224|28216|80840|506|517|521	0	0	0	0	0	0	0	0	0	0	0	0	0	0	0	0	0	0	0	0	0	0	0	0	0	0	0	0	0	0	0	0	0	0	0	0	0	0	0	0	0	0
Bacteria	Proteobacteria	Betaproteobacteria	Burkholderiales	Alcaligenaceae	Bordetella	Bordetella_genomosp_2	2|1224|28216|80840|506|517|1983456	0	0	0	0	0	0	0	0	0	0	0	0	0	0	0	0.29076	0	0	0	0	0	0	0	0	0	0	0	0	0	0	0	0	0	0	0	0	0	0	0	0	0	0
Bacteria	Proteobacteria	Betaproteobacteria	Burkholderiales	Alcaligenaceae	Bordetella	Bordetella_genomosp_4	2|1224|28216|80840|506|517|463044	0	0	0	0	0	0	0	0	0	0	0	0	0	0	0	0.25231	0	0	0	0	0	0	0	0	0	0	0	0	0	0	0	0	0	0	0	0	0	0	0	0	0	0
Bacteria	Proteobacteria	Betaproteobacteria	Burkholderiales	Alcaligenaceae	Bordetella	Bordetella_genomosp_5	2|1224|28216|80840|506|517|1395608	0	0	0	0	0	0	0	0	0	0	0	0	0	0	0	0	0	0	0	0	0	0	0	0	0	0	0	0	0	0	0	0	0	0	0	0	0	0	0	0	0	0
Bacteria	Proteobacteria	Betaproteobacteria	Burkholderiales	Alcaligenaceae	Bordetella	Bordetella_genomosp_7	2|1224|28216|80840|506|517|1416805	0	0	0	0	0	0	0	0	0	0	0	0	0	0	0	0.05528	0	0	0	0	0	0	0	0	0	0	0	0	0	0	0	0	0	0	0	0	0	0	0	0	0	0
Bacteria	Proteobacteria	Betaproteobacteria	Burkholderiales	Alcaligenaceae	Bordetella	Bordetella_sp_H567	2|1224|28216|80840|506|517|1697043	0	0	0	0	0	0	0	0	0	0	0	0	0	0	0	0	0	0	0	0	0	0	0	0	0	0	0	0	0	0	0	0	0	0	0	0	0	0	0	0	0	0
Bacteria	Proteobacteria	Betaproteobacteria	Burkholderiales	Alcaligenaceae	Bordetella	Bordetella_trematum	2|1224|28216|80840|506|517|123899	0	0	0	0	0	0	0	0	0	0	0	0	0	0	0	0	0	0	0	0	0	0	0	0	0	0	0	0	0	0	0	0	0	0	0	0	0	0	0	0	0	0
Bacteria	Proteobacteria	Betaproteobacteria	Burkholderiales	Alcaligenaceae	Oligella		2|1224|28216|80840|506|90243	0	0	0	0	0.0045	0.07422	0.043	0.05491	0.02002	0.03205	0	0	0	0	0	1.55312	0	0	0	0	0	0	0	0	0.00077	0.17814	0.31034	0	0	0.15185	0.12407	0.0214	3.76575	11.06204	0.58413	1.72871	0.1908	12.60254	1.87623	0	0	0
Bacteria	Proteobacteria	Betaproteobacteria	Burkholderiales	Alcaligenaceae	Oligella	Oligella_ureolytica	2|1224|28216|80840|506|90243|90244	0	0	0	0	0.0045	0.07422	0.043	0.05491	0.02002	0.03205	0	0	0	0	0	1.55312	0	0	0	0	0	0	0	0	0.00077	0.17814	0.31034	0	0	0.15185	0.12407	0.0214	3.76575	11.06204	0.58413	1.72871	0.1908	12.60254	1.87623	0	0	0
Bacteria	Proteobacteria	Betaproteobacteria	Burkholderiales	Alcaligenaceae	Paenalcaligenes		2|1224|28216|80840|506|1100891	0	0	0	0	0	0	0	0	0.00341	0	0	0	0	0	0	0.01311	0	0	0	0	0	0	0	0	0.0171	0.06227	0.06612	0.0115	0	0.01609	0.02766	0.0143	0.06564	0.04413	0.02677	0.0675	0.00096	0.15066	0.04035	0	0	0
Bacteria	Proteobacteria	Betaproteobacteria	Burkholderiales	Alcaligenaceae	Paenalcaligenes	Paenalcaligenes_hominis	2|1224|28216|80840|506|1100891|643674	0	0	0	0	0	0	0	0	0.00341	0	0	0	0	0	0	0.01311	0	0	0	0	0	0	0	0	0.0171	0.06227	0.06612	0.0115	0	0.01609	0.02766	0.0143	0.06564	0.04413	0.02677	0.0675	0.00096	0.15066	0.04035	0	0	0
Bacteria	Proteobacteria	Betaproteobacteria	Burkholderiales	Alcaligenaceae	Pusillimonas		2|1224|28216|80840|506|305976	0	0	0	0	0	0	0	0	0	0	0	0	0	0	0	0.61455	0	0	0	0	0	0	0	0	0	0	0	0	0	0	0	0	0	0	0	0	0	0	0	0	0	0
Bacteria	Proteobacteria	Betaproteobacteria	Burkholderiales	Alcaligenaceae	Pusillimonas	Pusillimonas_sp_JR1_69_2_13	2|1224|28216|80840|506|305976|2045209	0	0	0	0	0	0	0	0	0	0	0	0	0	0	0	0.57355	0	0	0	0	0	0	0	0	0	0	0	0	0	0	0	0	0	0	0	0	0	0	0	0	0	0
Bacteria	Proteobacteria	Betaproteobacteria	Burkholderiales	Alcaligenaceae	Pusillimonas	Pusillimonas_sp_JR1_69_3_13	2|1224|28216|80840|506|305976|2045210	0	0	0	0	0	0	0	0	0	0	0	0	0	0	0	0.041	0	0	0	0	0	0	0	0	0	0	0	0	0	0	0	0	0	0	0	0	0	0	0	0	0	0
Bacteria	Proteobacteria	Betaproteobacteria	Burkholderiales	Alcaligenaceae	Pusillimonas	Pusillimonas_sp_T2	2|1224|28216|80840|506|305976|1548123	0	0	0	0	0	0	0	0	0	0	0	0	0	0	0	0	0	0	0	0	0	0	0	0	0	0	0	0	0	0	0	0	0	0	0	0	0	0	0	0	0	0
Bacteria	Proteobacteria	Betaproteobacteria	Burkholderiales	Burkholderiaceae			2|1224|28216|80840|119060	0	0	0	0	0	0	0	0	0	0	0	0	0	0	0	0	0	0	0	0	0	0	0	0	0	0	0	0	0	0	0	0	0	0	0	0	0	0	0	0	0	0
Bacteria	Proteobacteria	Betaproteobacteria	Burkholderiales	Burkholderiaceae	Caballeronia		2|1224|28216|80840|119060|1827195	0	0	0	0	0	0	0	0	0	0	0	0	0	0	0	0	0	0	0	0	0	0	0	0	0	0	0	0	0	0	0	0	0	0	0	0	0	0	0	0	0	0
Bacteria	Proteobacteria	Betaproteobacteria	Burkholderiales	Burkholderiaceae	Caballeronia	Caballeronia_turbans	2|1224|28216|80840|119060|1827195|1777134	0	0	0	0	0	0	0	0	0	0	0	0	0	0	0	0	0	0	0	0	0	0	0	0	0	0	0	0	0	0	0	0	0	0	0	0	0	0	0	0	0	0
Bacteria	Proteobacteria	Betaproteobacteria	Burkholderiales	Burkholderiaceae	Chitinimonas		2|1224|28216|80840|119060|240411	0	0	0	0	0	0	0	0	0	0	0	0	0	0	0	0	0	0	0	0	0	0	0	0	0	0	0	0	0	0	0	0	0	0	0	0	0	0	0	0	0	0
Bacteria	Proteobacteria	Betaproteobacteria	Burkholderiales	Burkholderiaceae	Chitinimonas	Chitinimonas_taiwanensis	2|1224|28216|80840|119060|240411|240412	0	0	0	0	0	0	0	0	0	0	0	0	0	0	0	0	0	0	0	0	0	0	0	0	0	0	0	0	0	0	0	0	0	0	0	0	0	0	0	0	0	0
Bacteria	Proteobacteria	Betaproteobacteria	Burkholderiales	Burkholderiaceae	Cupriavidus		2|1224|28216|80840|119060|106589	0	0	0	0	0	0	0	0	0	0	0	0	0	0	0	0	0	0	0	0	0	0	0	0	0	0	0	0	0	0	0	0	0	0	0	0	0	0	0	0	0	0
Bacteria	Proteobacteria	Betaproteobacteria	Burkholderiales	Burkholderiaceae	Cupriavidus	Cupriavidus_alkaliphilus	2|1224|28216|80840|119060|106589|942866	0	0	0	0	0	0	0	0	0	0	0	0	0	0	0	0	0	0	0	0	0	0	0	0	0	0	0	0	0	0	0	0	0	0	0	0	0	0	0	0	0	0
Bacteria	Proteobacteria	Betaproteobacteria	Burkholderiales	Burkholderiaceae	Cupriavidus	Cupriavidus_necator	2|1224|28216|80840|119060|106589|106590	0	0	0	0	0	0	0	0	0	0	0	0	0	0	0	0	0	0	0	0	0	0	0	0	0	0	0	0	0	0	0	0	0	0	0	0	0	0	0	0	0	0
Bacteria	Proteobacteria	Betaproteobacteria	Burkholderiales	Burkholderiaceae	Cupriavidus	Cupriavidus_oxalaticus	2|1224|28216|80840|119060|106589|96344	0	0	0	0	0	0	0	0	0	0	0	0	0	0	0	0	0	0	0	0	0	0	0	0	0	0	0	0	0	0	0	0	0	0	0	0	0	0	0	0	0	0
Bacteria	Proteobacteria	Betaproteobacteria	Burkholderiales	Burkholderiaceae	Cupriavidus	Cupriavidus_sp	2|1224|28216|80840|119060|106589|1873897	0	0	0	0	0	0	0	0	0	0	0	0	0	0	0	0	0	0	0	0	0	0	0	0	0	0	0	0	0	0	0	0	0	0	0	0	0	0	0	0	0	0
Bacteria	Proteobacteria	Betaproteobacteria	Burkholderiales	Burkholderiaceae	Limnobacter		2|1224|28216|80840|119060|131079	0	0	0	0	0	0	0	0	0	0	0	0	0	0	0	0	0	0	0	0	0	0	0	0	0	0	0	0	0	0	0	0	0	0	0	0	0	0	0	0	0	0
Bacteria	Proteobacteria	Betaproteobacteria	Burkholderiales	Burkholderiaceae	Limnobacter	Limnobacter_sp_CACIAM_66H1	2|1224|28216|80840|119060|131079|1813033	0	0	0	0	0	0	0	0	0	0	0	0	0	0	0	0	0	0	0	0	0	0	0	0	0	0	0	0	0	0	0	0	0	0	0	0	0	0	0	0	0	0
Bacteria	Proteobacteria	Betaproteobacteria	Burkholderiales	Burkholderiaceae	Paraburkholderia		2|1224|28216|80840|119060|1822464	0	0	0	0	0	0	0	0	0	0	0	0	0	0	0	0	0	0	0	0	0	0	0	0	0	0	0	0	0	0	0	0	0	0	0	0	0	0	0	0	0	0
Bacteria	Proteobacteria	Betaproteobacteria	Burkholderiales	Burkholderiaceae	Paraburkholderia	Paraburkholderia_caribensis	2|1224|28216|80840|119060|1822464|75105	0	0	0	0	0	0	0	0	0	0	0	0	0	0	0	0	0	0	0	0	0	0	0	0	0	0	0	0	0	0	0	0	0	0	0	0	0	0	0	0	0	0
Bacteria	Proteobacteria	Betaproteobacteria	Burkholderiales	Burkholderiaceae	Paraburkholderia	Paraburkholderia_graminis	2|1224|28216|80840|119060|1822464|60548	0	0	0	0	0	0	0	0	0	0	0	0	0	0	0	0	0	0	0	0	0	0	0	0	0	0	0	0	0	0	0	0	0	0	0	0	0	0	0	0	0	0
Bacteria	Proteobacteria	Betaproteobacteria	Burkholderiales	Burkholderiaceae	Paraburkholderia	Paraburkholderia_sp_SOS3	2|1224|28216|80840|119060|1822464|1926494	0	0	0	0	0	0	0	0	0	0	0	0	0	0	0	0	0	0	0	0	0	0	0	0	0	0	0	0	0	0	0	0	0	0	0	0	0	0	0	0	0	0
Bacteria	Proteobacteria	Betaproteobacteria	Burkholderiales	Burkholderiaceae	Paraburkholderia	Paraburkholderia_tropica	2|1224|28216|80840|119060|1822464|92647	0	0	0	0	0	0	0	0	0	0	0	0	0	0	0	0	0	0	0	0	0	0	0	0	0	0	0	0	0	0	0	0	0	0	0	0	0	0	0	0	0	0
Bacteria	Proteobacteria	Betaproteobacteria	Burkholderiales	Burkholderiaceae	Ralstonia		2|1224|28216|80840|119060|48736	0	0	0	0	0	0	0	0	0	0	0	0	0	0	0	0	0	0	0	0	0	0	0	0	0	0	0	0	0	0	0	0	0	0	0	0	0	0	0	0	0	0
Bacteria	Proteobacteria	Betaproteobacteria	Burkholderiales	Burkholderiaceae	Ralstonia	Ralstonia_pickettii	2|1224|28216|80840|119060|48736|329	0	0	0	0	0	0	0	0	0	0	0	0	0	0	0	0	0	0	0	0	0	0	0	0	0	0	0	0	0	0	0	0	0	0	0	0	0	0	0	0	0	0
Bacteria	Proteobacteria	Betaproteobacteria	Burkholderiales	Burkholderiales_unclassified				0	0	0	0	0	0	0	0	0	0	0	0	0	0	0.40024	0	0	0	0	0	0	0	0	0	0	0	0	0	0	0	0	0	0	0	0	0	0	0	0	0	0	0
Bacteria	Proteobacteria	Betaproteobacteria	Burkholderiales	Burkholderiales_unclassified			2|1224|28216|80840|	0	0	0	0	0	0	0	0	0	0	0	0	0	0	0	0	0	0	0	0	0	0	0	0	0	0	0	0	0	0	0	0	0	0	0	0	0	0	0	0	0	0
Bacteria	Proteobacteria	Betaproteobacteria	Burkholderiales	Burkholderiales_unclassified	Aquabacterium		2|1224|28216|80840||92793	0	0	0	0	0	0	0	0	0	0	0	0	0	0	0	0	0	0	0	0	0	0	0	0	0	0	0	0	0	0	0	0	0	0	0	0	0	0	0	0	0	0
Bacteria	Proteobacteria	Betaproteobacteria	Burkholderiales	Burkholderiales_unclassified	Aquabacterium	Aquabacterium_olei	2|1224|28216|80840||92793|1296669	0	0	0	0	0	0	0	0	0	0	0	0	0	0	0	0	0	0	0	0	0	0	0	0	0	0	0	0	0	0	0	0	0	0	0	0	0	0	0	0	0	0
Bacteria	Proteobacteria	Betaproteobacteria	Burkholderiales	Burkholderiales_unclassified	Burkholderiales_unclassified			0	0	0	0	0	0	0	0	0	0	0	0	0	0	0	0	0	0	0	0	0	0	0	0	0	0	0	0	0	0	0	0	0	0	0	0	0	0	0	0	0	0
Bacteria	Proteobacteria	Betaproteobacteria	Burkholderiales	Burkholderiales_unclassified	Burkholderiales_unclassified		2|1224|28216|80840||	0	0	0	0	0	0	0	0	0	0	0	0	0	0	0	0	0	0	0	0	0	0	0	0	0	0	0	0	0	0	0	0	0	0	0	0	0	0	0	0	0	0
Bacteria	Proteobacteria	Betaproteobacteria	Burkholderiales	Burkholderiales_unclassified	Burkholderiales_unclassified	Burkholderiales_bacterium_RIFCSPLOWO2_12_FULL_65_40	2|1224|28216|80840|||1797569	0	0	0	0	0	0	0	0	0	0	0	0	0	0	0	0	0	0	0	0	0	0	0	0	0	0	0	0	0	0	0	0	0	0	0	0	0	0	0	0	0	0
Bacteria	Proteobacteria	Betaproteobacteria	Burkholderiales	Burkholderiales_unclassified	Rhizobacter		2|1224|28216|80840||212743	0	0	0	0	0	0	0	0	0	0	0	0	0	0	0.40024	0	0	0	0	0	0	0	0	0	0	0	0	0	0	0	0	0	0	0	0	0	0	0	0	0	0	0
Bacteria	Proteobacteria	Betaproteobacteria	Burkholderiales	Burkholderiales_unclassified	Rhizobacter	Rhizobacter_gummiphilus	2|1224|28216|80840||212743|946333	0	0	0	0	0	0	0	0	0	0	0	0	0	0	0.40024	0	0	0	0	0	0	0	0	0	0	0	0	0	0	0	0	0	0	0	0	0	0	0	0	0	0	0
Bacteria	Proteobacteria	Betaproteobacteria	Burkholderiales	Burkholderiales_unclassified	Rubrivivax		2|1224|28216|80840||28067	0	0	0	0	0	0	0	0	0	0	0	0	0	0	0	0	0	0	0	0	0	0	0	0	0	0	0	0	0	0	0	0	0	0	0	0	0	0	0	0	0	0
Bacteria	Proteobacteria	Betaproteobacteria	Burkholderiales	Burkholderiales_unclassified	Rubrivivax	Rubrivivax_benzoatilyticus	2|1224|28216|80840||28067|316997	0	0	0	0	0	0	0	0	0	0	0	0	0	0	0	0	0	0	0	0	0	0	0	0	0	0	0	0	0	0	0	0	0	0	0	0	0	0	0	0	0	0
Bacteria	Proteobacteria	Betaproteobacteria	Burkholderiales	Burkholderiales_unclassified	Sphaerotilus		2|1224|28216|80840||34102	0	0	0	0	0	0	0	0	0	0	0	0	0	0	0	0	0	0	0	0	0	0	0	0	0	0	0	0	0	0	0	0	0	0	0	0	0	0	0	0	0	0
Bacteria	Proteobacteria	Betaproteobacteria	Burkholderiales	Burkholderiales_unclassified	Sphaerotilus	Sphaerotilus_natans	2|1224|28216|80840||34102|34103	0	0	0	0	0	0	0	0	0	0	0	0	0	0	0	0	0	0	0	0	0	0	0	0	0	0	0	0	0	0	0	0	0	0	0	0	0	0	0	0	0	0
Bacteria	Proteobacteria	Betaproteobacteria	Burkholderiales	Comamonadaceae			2|1224|28216|80840|80864	0	0	0	0	0	0.00702	0	0	0.0071	0	0.43964	0.52959	3.3954	0	0.07992	0.31727	0	0	0	0	0	0	0	0	0	0	0	0	0	0	0	0	0	0	0	0	0	0	0	0	0	0
Bacteria	Proteobacteria	Betaproteobacteria	Burkholderiales	Comamonadaceae	Acidovorax		2|1224|28216|80840|80864|12916	0	0	0	0	0	0	0	0	0	0	0.43964	0.52959	0.0472	0	0	0.02261	0	0	0	0	0	0	0	0	0	0	0	0	0	0	0	0	0	0	0	0	0	0	0	0	0	0
Bacteria	Proteobacteria	Betaproteobacteria	Burkholderiales	Comamonadaceae	Acidovorax	Acidovorax_caeni	2|1224|28216|80840|80864|12916|343013	0	0	0	0	0	0	0	0	0	0	0	0	0	0	0	0	0	0	0	0	0	0	0	0	0	0	0	0	0	0	0	0	0	0	0	0	0	0	0	0	0	0
Bacteria	Proteobacteria	Betaproteobacteria	Burkholderiales	Comamonadaceae	Acidovorax	Acidovorax_carolinensis	2|1224|28216|80840|80864|12916|553814	0	0	0	0	0	0	0	0	0	0	0	0	0	0	0	0	0	0	0	0	0	0	0	0	0	0	0	0	0	0	0	0	0	0	0	0	0	0	0	0	0	0
Bacteria	Proteobacteria	Betaproteobacteria	Burkholderiales	Comamonadaceae	Acidovorax	Acidovorax_defluvii	2|1224|28216|80840|80864|12916|86669	0	0	0	0	0	0	0	0	0	0	0.41645	0.46571	0	0	0	0	0	0	0	0	0	0	0	0	0	0	0	0	0	0	0	0	0	0	0	0	0	0	0	0	0	0
Bacteria	Proteobacteria	Betaproteobacteria	Burkholderiales	Comamonadaceae	Acidovorax	Acidovorax_ebreus	2|1224|28216|80840|80864|12916|721785	0	0	0	0	0	0	0	0	0	0	0	0	0	0	0	0.02261	0	0	0	0	0	0	0	0	0	0	0	0	0	0	0	0	0	0	0	0	0	0	0	0	0	0
Bacteria	Proteobacteria	Betaproteobacteria	Burkholderiales	Comamonadaceae	Acidovorax	Acidovorax_soli	2|1224|28216|80840|80864|12916|592050	0	0	0	0	0	0	0	0	0	0	0	0	0	0	0	0	0	0	0	0	0	0	0	0	0	0	0	0	0	0	0	0	0	0	0	0	0	0	0	0	0	0
Bacteria	Proteobacteria	Betaproteobacteria	Burkholderiales	Comamonadaceae	Acidovorax	Acidovorax_sp_GW101_3H11	2|1224|28216|80840|80864|12916|1813946	0	0	0	0	0	0	0	0	0	0	0	0	0	0	0	0	0	0	0	0	0	0	0	0	0	0	0	0	0	0	0	0	0	0	0	0	0	0	0	0	0	0
Bacteria	Proteobacteria	Betaproteobacteria	Burkholderiales	Comamonadaceae	Acidovorax	Acidovorax_sp_KKS102	2|1224|28216|80840|80864|12916|358220	0	0	0	0	0	0	0	0	0	0	0	0	0	0	0	0	0	0	0	0	0	0	0	0	0	0	0	0	0	0	0	0	0	0	0	0	0	0	0	0	0	0
Bacteria	Proteobacteria	Betaproteobacteria	Burkholderiales	Comamonadaceae	Acidovorax	Acidovorax_sp_Leaf160	2|1224|28216|80840|80864|12916|1736280	0	0	0	0	0	0	0	0	0	0	0	0	0.0472	0	0	0	0	0	0	0	0	0	0	0	0	0	0	0	0	0	0	0	0	0	0	0	0	0	0	0	0	0
Bacteria	Proteobacteria	Betaproteobacteria	Burkholderiales	Comamonadaceae	Acidovorax	Acidovorax_sp_MR_S7	2|1224|28216|80840|80864|12916|1268622	0	0	0	0	0	0	0	0	0	0	0	0	0	0	0	0	0	0	0	0	0	0	0	0	0	0	0	0	0	0	0	0	0	0	0	0	0	0	0	0	0	0
Bacteria	Proteobacteria	Betaproteobacteria	Burkholderiales	Comamonadaceae	Acidovorax	Acidovorax_sp_NO_1	2|1224|28216|80840|80864|12916|512030	0	0	0	0	0	0	0	0	0	0	0	0	0	0	0	0	0	0	0	0	0	0	0	0	0	0	0	0	0	0	0	0	0	0	0	0	0	0	0	0	0	0
Bacteria	Proteobacteria	Betaproteobacteria	Burkholderiales	Comamonadaceae	Acidovorax	Acidovorax_temperans	2|1224|28216|80840|80864|12916|80878	0	0	0	0	0	0	0	0	0	0	0.02319	0.06388	0	0	0	0	0	0	0	0	0	0	0	0	0	0	0	0	0	0	0	0	0	0	0	0	0	0	0	0	0	0
Bacteria	Proteobacteria	Betaproteobacteria	Burkholderiales	Comamonadaceae	Brachymonas		2|1224|28216|80840|80864|28219	0	0	0	0	0	0	0	0	0	0	0	0	0	0	0	0	0	0	0	0	0	0	0	0	0	0	0	0	0	0	0	0	0	0	0	0	0	0	0	0	0	0
[truncated: 714 more rows]
[truncated: 419 more columns]
