# Supplementary material for: Machine learning and metagenomics enhance surveillance of antimicrobial resistance in chicken production in China
Source: Research Square preprint supplement (doi:10.21203/rs.3.rs-2458989/v1), 2023-01-13
Supplement: Supplementary file 6 [file 873c23a9188f9ebcbb289041.xlsx]

## Sheet: Humidity
feature	Antibiotic Class (CARD)	slope	intercept	r2 value	p-value	std_err
spd	aminoglycoside	10.0404	57.8641	0.433467	1.16515e-10	1.47601
aadA14	aminoglycoside	11.6016	59.8612	0.372655	4.71978e-08	2.04281
apmA	aminoglycoside	8.08165	56.9607	0.355561	2.07158e-07	1.50218
AAC(6')-Il	aminoglycoside	10.3214	59.8533	0.348131	3.83675e-07	1.96529
APH(3')-VI	aminoglycoside	9.46298	60.0489	0.315525	4.78492e-06	2.01237
aadA9	aminoglycoside	14.665	60.7705	0.308931	7.69878e-06	3.19246
aadA16	aminoglycoside	7.83461	59.5861	0.307157	8.73274e-06	1.71642
AAC(6')-IIa	aminoglycoside	8.74955	60.039	0.301606	1.28858e-05	1.95578
aadA13	aminoglycoside	13.6808	60.829	0.288197	3.19329e-05	3.21423
aadA7	aminoglycoside	15.3822	60.9563	0.282833	4.53359e-05	3.68866
AAC(6')-Ib4	aminoglycoside	12.7038	60.887	0.267617	0.000117918	3.23422
AAC(6')-Iad	aminoglycoside	10.3464	60.7197	0.262691	0.000158781	2.68721
APH(3')-VIa	aminoglycoside	7.41753	60.3565	0.250186	0.000329381	2.02976
ANT(9)-Ia	aminoglycoside	6.06863	60.1095	0.23495	0.000763256	1.77529
ANT(2'')-Ia	aminoglycoside	5.49677	59.7096	0.233875	0.000808282	1.61582
AAC(6')-Iid	aminoglycoside	15.1141	61.1927	0.228664	0.00106327	4.54997
APH(2'')-Ie	aminoglycoside	11.5393	61.0704	0.22307	0.0014176	3.56566
AAC(6')-Iai	aminoglycoside	13.5746	61.1713	0.221261	0.00155348	4.23065
AAC(6')-Iih	aminoglycoside	6.50763	60.6752	0.206233	0.00323311	2.18329
aadA5	aminoglycoside	4.33361	59.1745	0.191236	0.00640457	1.5728
AAC(6')-Im	aminoglycoside	4.76393	58.0805	0.184438	0.00859722	1.79508
APH(4)-Ia	aminoglycoside	6.14436	56.2578	0.18032	0.0102282	2.36995
aadA11	aminoglycoside	10.7796	61.2681	0.175703	0.0123772	4.27069
AAC(6')-Ib8	aminoglycoside	10.3415	61.2833	0.168563	0.0164825	4.2761
aphA15	aminoglycoside	5.86631	61.0899	0.152608	0.0301412	2.6863
AAC(6')-Ib9	aminoglycoside	6.7465	61.2075	0.147534	0.0361425	3.1981
AAC(6')-Ia	aminoglycoside	8.05534	61.3227	0.140004	0.0468909	4.02837
DHA-1	beta lactam	10.9856	59.7382	0.370533	5.69768e-08	1.94721
ramA	beta lactam	8.50357	58.5686	0.364056	1.00395e-07	1.53831
OXA-58	beta lactam	11.5921	60.0349	0.356965	1.84043e-07	2.14497
OXA-21	beta lactam	13.1666	60.3381	0.350459	3.16842e-07	2.48809
VEB-1	beta lactam	12.8702	60.3037	0.350061	3.27407e-07	2.43522
PER-1	beta lactam	15.2225	60.5867	0.34454	5.13937e-07	2.93286
MOX-3	beta lactam	13.4781	60.5741	0.324381	2.48093e-06	2.77917
SHV-110	beta lactam	16.8234	60.8921	0.309333	7.48117e-06	3.65707
CARB-3	beta lactam	10.1466	60.3357	0.302813	1.18487e-05	2.25812
OXA-209	beta lactam	14.3372	60.79	0.302025	1.25162e-05	3.1999
Bla2	beta lactam	-14.3977	62.4257	-0.291151	2.62488e-05	3.34523
BLA1	beta lactam	-13.6872	62.4548	-0.288332	3.16494e-05	3.2141
NDM-1	beta lactam	10.2627	60.524	0.284918	3.95971e-05	2.44142
OXA-1	beta lactam	6.41696	58.9732	0.281852	4.83001e-05	1.54461
cepA_beta-lactamase	beta lactam	9.18784	60.4136	0.278629	5.93737e-05	2.23936
CTX-M-27	beta lactam	-13.0111	62.4146	-0.27409	7.9058e-05	3.2281
EBR-2	beta lactam	14.3248	61.0035	0.26339	0.000152271	3.70989
OXA-465	beta lactam	15.2891	61.1119	0.249207	0.000348207	4.20131
CARB-16	beta lactam	9.40773	60.7568	0.244736	0.000447592	2.63548
MUS-1_beta-lactamase	beta lactam	14.1461	61.1515	0.230576	0.000962158	4.22128
CTX-M-24	beta lactam	9.45906	60.9393	0.221017	0.00157266	2.95143
Klebsiella_pneumoniae_OmpK37	beta lactam	11.3457	61.08	0.219327	0.00171178	3.56876
OXA-85	beta lactam	15.0575	61.3435	0.18695	0.00771935	5.59482
CblA-1	beta lactam	5.66024	60.745	0.184181	0.00869166	2.1359
ACT-25	beta lactam	14.7785	61.349	0.183486	0.00895222	5.59854
OXA-347	beta lactam	4.19724	59.1275	0.18332	0.00901537	1.59153
CMY-59	beta lactam	6.33719	60.9515	0.175936	0.0122599	2.50725
OXA-45	beta lactam	13.2114	61.3801	0.16403	0.0196659	5.61809
CARB-4	beta lactam	9.96433	61.2964	0.162415	0.0209226	4.28058
CfxA	beta lactam	11.1801	61.3649	0.154801	0.0278242	5.04532
CTX-M-55	beta lactam	3.85893	58.8144	0.152197	0.0305942	1.77197
OXA-257	beta lactam	23.971	61.523	0.149932	0.0331908	11.1773
OXA-246	beta lactam	23.971	61.523	0.149932	0.0331908	11.1773
MUS-2_beta-lactamase	beta lactam	13.6751	61.4386	0.14741	0.0363005	6.48807
TEM-150	beta lactam	-16.4051	61.8041	-0.144751	0.0398439	7.92949
PC1_beta-lactamase_(blaZ)	beta lactam	13.0765	61.4475	0.140958	0.0453963	6.49424
QnrB26	fluoroquinolone	22.2302	61.0914	0.307803	8.3419e-06	4.85894
QnrB2	fluoroquinolone	21.8003	61.1021	0.301851	1.26686e-05	4.86867
QnrD1	fluoroquinolone	8.02479	60.0129	0.287641	3.31267e-05	1.88936
LAP-2	fluoroquinolone	9.41946	60.7557	0.245042	0.000440047	2.63527
QnrA1	fluoroquinolone	10.4975	60.9141	0.237597	0.000662082	3.03468
QnrB4	fluoroquinolone	9.03266	60.7921	0.234979	0.000762076	2.64203
QnrVC6	fluoroquinolone	6.78461	60.9699	0.180587	0.0101148	2.6129
QnrS2	fluoroquinolone	4.48484	60.8868	0.149538	0.0336613	2.09686
QnrB5	fluoroquinolone	9.09462	61.3265	0.148239	0.0352528	4.29025
QnrVC1	fluoroquinolone	7.64656	61.301	0.140597	0.0459569	3.80749
FosC2	fosfomycin	12.0132	60.3333	0.333516	1.23253e-06	2.40115
FosB	fosfomycin	-13.5444	62.3793	-0.273896	8.00251e-05	3.363
FosD	fosfomycin	10.9366	60.7213	0.270585	9.82877e-05	2.75139
FosA6	fosfomycin	8.52603	60.7975	0.226939	0.00116272	2.58727
FosB3	fosfomycin	5.09294	59.8264	0.217379	0.00188605	1.61705
FosK	fosfomycin	7.52027	61.0088	0.186061	0.00802057	2.8081
vanZF	glycopeptide	-14.2485	62.2765	-0.261988	0.000165593	3.71136
determinant_of_bleomycin_resistance	glycopeptide	6.6983	60.3484	0.235614	0.000736608	1.95364
vanC	glycopeptide	10.1433	60.9889	0.221817	0.00151047	3.15293
vanXYC	glycopeptide	7.01525	60.9471	0.186726	0.00779436	2.60986
vanTC	glycopeptide	8.81755	61.1179	0.185749	0.00812862	3.29824
vanSC	glycopeptide	7.74844	61.143	0.169445	0.0159186	3.18673
vanWG	glycopeptide	-6.48531	62.1554	-0.156084	0.02654	2.90203
vanRC	glycopeptide	6.80963	61.1697	0.154127	0.0285199	3.08681
MexD	MDR	13.7292	59.8746	0.409732	1.40243e-09	2.16134
oqxB	MDR	7.73754	57.7729	0.344775	5.04258e-07	1.48961
oqxA	MDR	6.85222	58.0799	0.305087	1.01057e-05	1.51244
sdiA	MDR	24.2119	61.2821	0.260992	0.000175705	6.33238
Klebsiella_pneumoniae_KpnF	MDR	8.58364	60.8768	0.217936	0.0018347	2.71808
AxyX	MDR	13.3359	61.1795	0.21737	0.00188693	4.23445
efrB	MDR	6.96637	60.7795	0.204444	0.00351658	2.35855
Klebsiella_pneumoniae_KpnE	MDR	8.56406	61.0057	0.200105	0.00429947	2.96506
Klebsiella_pneumoniae_acrA	MDR	8.41888	61.0165	0.196713	0.00501716	2.96714
Klebsiella_pneumoniae_KpnG	MDR	7.84196	61.0205	0.188735	0.00714517	2.88523
emeA	MDR	6.54356	60.8642	0.188687	0.00716023	2.40816
cmeR	MDR	9.17511	61.2329	0.168703	0.0163921	3.79056
AxyY	MDR	13.1693	61.3809	0.163508	0.0200651	5.61858
smeE	MDR	13.1288	61.3817	0.163004	0.0204563	5.61906
efrA	MDR	5.85357	61.0331	0.159214	0.0236191	2.56655
OprJ	MDR	23.971	61.523	0.149932	0.0331908	11.1773
ErmC	MLSB	11.4746	53.5186	0.464988	3.1312e-12	1.54482
mphE	MLSB	10.3453	57.3909	0.453595	1.20809e-11	1.43728
msrE	MLSB	10.0609	57.956	0.431983	1.36898e-10	1.48526
mefC	MLSB	12.7423	60.0016	0.38028	2.37212e-08	2.19135
mphG	MLSB	11.4441	59.7721	0.377044	3.18321e-08	1.98781
ErmA	MLSB	11.0059	52.5972	0.375354	3.70704e-08	1.92173
optrA	MLSB	8.67526	55.3714	0.34607	4.5396e-07	1.66304
EreA	MLSB	15.4703	60.7227	0.325896	2.21268e-06	3.1734
cfrA	MLSB	8.42258	59.682	0.317155	4.24668e-06	1.7809
mphF	MLSB	13.0623	60.607	0.314375	5.2027e-06	2.78907
EreA2	MLSB	16.8888	60.8892	0.310534	6.865e-06	3.65556
ErmX	MLSB	6.963	58.7462	0.305836	9.58665e-06	1.53274
vgaE	MLSB	11.2849	60.5244	0.300373	1.40337e-05	2.5339
ErmY	MLSB	11.4223	60.5673	0.297145	1.75157e-05	2.59536
Erm(35)	MLSB	11.209	60.6429	0.284592	4.04468e-05	2.66986
lnuF	MLSB	10.3909	60.5614	0.282627	4.59451e-05	2.49372
lnuD	MLSB	6.12484	58.7915	0.272259	8.86158e-05	1.53064
lsaB	MLSB	10.7199	60.6864	0.272176	8.9075e-05	2.67988
vgaC	MLSB	13.6996	60.9635	0.264832	0.000139618	3.52722
Erm(47)	MLSB	9.50338	60.6067	0.263838	0.000148229	2.45674
Erm(42)	MLSB	6.38517	59.7135	0.261251	0.000173021	1.6682
emtA	MLSB	6.00923	59.5295	0.255679	0.000240128	1.60668
mphL	MLSB	-14.1751	62.2031	-0.246367	0.000408641	3.94304
cfrC	MLSB	9.01393	60.7046	0.245174	0.000436811	2.52036
ErmQ	MLSB	-8.29542	62.5451	-0.230302	0.000976101	2.47852
Erm(36)	MLSB	13.5527	61.2391	0.205041	0.00341959	4.5745
Mef(En2)	MLSB	4.46171	59.0795	0.196603	0.00504194	1.57339
vga(E)_Staphylococcus_cohnii	MLSB	13.5499	61.3063	0.187614	0.00750113	5.01619
lsaA	MLSB	5.88377	61.0591	0.156609	0.0260292	2.6238
LnuP	MLSB	-4.51445	62.4686	-0.155618	0.0270006	2.02632
Bifidobacteria_intrinsic_ileS_conferring_resistance_to_mupirocin	mupirocin	8.99655	60.5282	0.264024	0.000146577	2.32395
MCR-3.11	peptide	16.2383	60.9986	0.282226	4.71481e-05	3.90305
catA8	phenicol	12.6379	51.8817	0.47231	1.28027e-12	1.66771
cmx	phenicol	8.6328	57.5817	0.383987	1.68688e-08	1.46785
catB2	phenicol	14.7706	60.4717	0.355488	2.0842e-07	2.74613
cmlB1	phenicol	16.4607	60.7453	0.332868	1.2962e-06	3.29731
catQ	phenicol	8.98359	60.5743	0.259046	0.000197155	2.36851
catB8	phenicol	8.5583	60.5401	0.255412	0.000243881	2.29077
catI	phenicol	6.34812	59.8818	0.253237	0.000276594	1.71479
catB11	phenicol	9.10724	60.8301	0.23123	0.000929692	2.70954
catA4	phenicol	14.5332	61.21	0.219875	0.00166553	4.55942
catB10	phenicol	13.58	61.3728	0.168606	0.0164548	5.61369
catII	phenicol	18.5237	61.4583	0.163444	0.020114	7.90613
cmlA6	phenicol	5.11666	60.9324	0.157562	0.0251241	2.26757
catII_from_Escherichia_coli_K-12	phenicol	5.37117	61.1099	0.142965	0.0423822	2.62929
arr-3	rifamycin	7.42458	59.0688	0.314861	5.02209e-06	1.58258
arr-2	rifamycin	-5.33868	64.2053	-0.237698	0.000658473	1.54264
Bifidobacterium_adolescentis_rpoB_conferring_resistance_to_rifampicin	rifamycin	6.8087	60.5631	0.221552	0.00153083	2.11907
sul4	sulfonamide	11.1018	60.8722	0.251275	0.000309557	3.02391
sul1	sulfonamide	6.56575	55.8235	0.18586	0.00809004	2.45442
tet(39)	tetracycline	16.1143	59.2485	0.510677	8.19502e-15	1.91837
tet(Y)	tetracycline	14.1642	60.1692	0.385259	1.49925e-08	2.39903
tet(33)	tetracycline	12.0751	60.0277	0.366188	8.34331e-08	2.16974
tet(G)	tetracycline	10.0634	59.7486	0.350484	3.16178e-07	1.90151
tet36	tetracycline	10.8508	59.9765	0.348539	3.7106e-07	2.06334
Tet(X4)	tetracycline	10.6267	59.9582	0.345787	4.64526e-07	2.03902
tet(Z)	tetracycline	8.66445	59.2826	0.34371	5.49572e-07	1.67392
tetS	tetracycline	10.3971	60.2005	0.320166	3.40015e-06	2.17538
tet(H)	tetracycline	9.87715	60.2237	0.308649	7.8547e-06	2.15235
Tet(X3)	tetracycline	15.6721	60.8658	0.302962	1.17261e-05	3.48592
tet(C)	tetracycline	7.78798	60.0224	0.281657	4.89098e-05	1.87603
tet(59)	tetracycline	10.7799	60.7345	0.266708	0.000124627	2.75448
tet(D)	tetracycline	9.18671	60.6411	0.255046	0.000249121	2.46275
tetX	tetracycline	5.63537	59.6051	0.241263	0.0005423	1.60286
tet(31)	tetracycline	9.77304	60.8676	0.235211	0.000752687	2.85561
tetT	tetracycline	8.16044	60.7529	0.226554	0.00118601	2.48076
tet(J)	tetracycline	11.2046	61.1425	0.20602	0.0032658	3.76319
tetU	tetracycline	6.14202	60.6383	0.202359	0.00387507	2.10181
tet(B)	tetracycline	4.89324	60.1882	0.199263	0.00446832	1.70159
tet(K)	tetracycline	8.07139	61.2022	0.16322	0.0202879	3.44983
dfrA16	trimethoprim	12.9154	59.9154	0.39167	8.21011e-09	2.14541
dfrA27	trimethoprim	8.66993	58.766	0.363773	1.02882e-07	1.56981
dfrA20	trimethoprim	14.8303	60.5404	0.34652	4.37652e-07	2.83877
dfrD	trimethoprim	12.2054	60.5541	0.309891	7.18842e-06	2.64792
dfrA15	trimethoprim	10.0314	60.6485	0.267008	0.000122371	2.56013
dfrA19	trimethoprim	13.86	61.0928	0.240891	0.000553471	3.94863
dfrA32	trimethoprim	13.8839	61.2293	0.210051	0.00269615	4.56953
dfrA17	trimethoprim	4.3724	58.9793	0.190151	0.00671712	1.59629
dfrE	trimethoprim	6.4556	60.8427	0.189454	0.00692475	2.36581
dfrA6_from_Proteus_mirabilis	trimethoprim	13.5499	61.3063	0.187614	0.00750113	5.01619
Psychrobacter_pasteurii		24.3855	61.0456	0.26069	0.000178887	6.38573
Bacillus_cereus_group		-29.8186	62.2862	-0.254828	0.000252292	8.00101
Bacteroides_vulgatus		30.2586	61.0722	0.250154	0.000329978	8.28122
Helicobacter_pullorum		-19.7169	62.1093	-0.232797	0.000855858	5.82435
Wohlfahrtiimonas_sp_G9077		21.7762	61.16	0.231806	0.00090188	6.46172
Acinetobacter_sp_WCHAc060041		25.3854	61.3097	0.226163	0.00121016	7.73117
Proteus_mirabilis		20.0427	60.8909	0.225981	0.00122155	6.10924
Klebsiella_quasipneumoniae		20.3152	61.0841	0.218658	0.00176994	6.41065
Wohlfahrtiimonas_chitiniclastica		19.2674	61.102	0.215132	0.00210705	6.1846
Klebsiella_pneumoniae		23.9424	61.0984	0.214001	0.00222699	7.72782
Proteus_hauseri		27.8069	61.1735	0.212268	0.00242285	9.05191
Klebsiella_variicola		24.0636	61.1571	0.205449	0.00335472	8.10542
Myroides_odoratimimus		20.7266	61.2132	0.202825	0.00379215	7.0757
Butyricimonas_synergistica		21.4064	61.2832	0.198583	0.00460921	7.47051
Providencia_alcalifaciens		20.2003	61.2954	0.196145	0.00514712	7.14078
Providencia_rettgeri		23.8263	61.2545	0.189626	0.00687296	8.72351
Globicatella_sulfidifaciens		16.2611	61.0973	0.18711	0.00766623	6.03668
Proteus_vulgaris		22.3229	61.2436	0.183475	0.0089566	8.45717
Butyricimonas_virosa		22.0968	61.269	0.181407	0.00977315	8.47019
Paracoccus_alcaliphilus		22.4026	61.3381	0.180912	0.0099783	8.61172
Barnesiella_intestinihominis		19.2407	61.2272	0.180442	0.0101766	7.41621
Corynebacterium_amycolatum		25.3751	61.328	0.180137	0.0103067	9.79775
Bacteroides_massiliensis		25.2182	61.3657	0.179622	0.0105306	9.76604
Alcaligenes_faecalis		17.2183	61.2726	0.178642	0.010968	6.70578
Pisciglobus_halotolerans		24.4722	61.349	0.176699	0.0118828	9.6391
Globicatella_sanguinis		14.8496	61.1494	0.174029	0.013249	5.94153
Pontibaca_methylaminivorans		19.4253	61.3589	0.173786	0.0133804	7.78357
Paenalcaligenes_hominis		15.6389	61.2115	0.17252	0.0140812	6.31381
Petrimonas_mucosa		18.8351	61.363	0.169956	0.0155991	7.72239
Corynebacterium_urealyticum		21.1662	61.3958	0.169763	0.0157193	8.68829
Ruminococcaceae_bacterium_D16		15.9496	61.1648	0.16822	0.0167069	6.6088
Parabacteroides_distasonis		15.2207	61.1262	0.167485	0.0171957	6.33526
Staphylococcus_aureus		21.1217	61.4143	0.163275	0.0202451	9.02459
Bacteroides_salyersiae		23.0511	61.4146	0.163168	0.0203286	9.85561
Bacteroides_intestinalis		19.3478	61.416	0.162635	0.020747	8.30006
Lachnoclostridium_sp_An76		-11.9176	62.6083	-0.156713	0.025929	5.31089
Lysinibacillus_sp_BF_4		22.9338	61.4262	0.156279	0.0263492	10.2492
Bacteroides_stercoris		-12.2092	62.0783	-0.1541	0.0285481	5.53545
Oligella_ureolytica		17.8267	61.4113	0.152877	0.0298492	8.14853
Lactobacillus_vaccinostercus		17.9218	61.3709	0.152818	0.0299125	8.1952
Lactobacillus_gallinarum		14.8825	61.173	0.151337	0.0315585	6.87359
Staphylococcus_piscifermentans		-18.5325	61.8531	-0.151183	0.0317349	8.56831
Jeotgalibaca_sp_PTS2502		22.7654	61.4209	0.149998	0.0331128	10.6105
Bacteroides_faecis		15.9858	61.2598	0.149724	0.0334385	7.46458
[Collinsella]_massiliensis		13.0162	61.253	0.148375	0.0350828	6.13443
Massiliomicrobiota_timonensis		-18.2039	61.8948	-0.146932	0.0369178	8.66553
Eubacterium_aggregans		20.1307	61.4689	0.142315	0.0433398	9.90034
Erysipelotrichaceae_bacterium_MTC7		20.7352	61.4764	0.139191	0.048197	10.4312

## Sheet: Temperature
feature	Antibiotic Class (CARD)	slope	intercept	r2 value	p-value	std_err
AAC(6')-Ib4	aminoglycoside	2.48916	24.7817	0.138489	0.0493481	1.25868
AAC(6')-Iad	aminoglycoside	2.07228	24.7449	0.13896	0.0485733	1.04426
ANT(9)-Ia	aminoglycoside	1.36713	24.5844	0.139791	0.0472298	0.684746
aadA5	aminoglycoside	1.21994	24.235	0.142182	0.0435381	0.600544
aadA9	aminoglycoside	2.56482	24.7772	0.142699	0.0427722	1.25792
spd	aminoglycoside	1.26095	24.4551	0.143776	0.0412129	0.613706
aadA11	aminoglycoside	3.42559	24.8108	0.147468	0.0362265	1.6246
AAC(6')-Iai	aminoglycoside	3.53273	24.8071	0.152081	0.030723	1.62346
aadA14	aminoglycoside	2.09816	24.6075	0.177998	0.0112642	0.820197
AAC(3)-IIe	aminoglycoside	2.24071	24.5857	0.190091	0.00673463	0.81831
ANT(2'')-Ia	aminoglycoside	2.19397	24.1584	0.246543	0.00040464	0.609827
CfxA2	beta lactam	-3.65399	25.8159	-0.368644	6.72973e-08	0.651519
CTX-M-9	beta lactam	-8.32823	25.0532	-0.237103	0.000679977	2.41289
Bla2	beta lactam	-4.13999	25.155	-0.22111	0.00156529	1.29119
BLA1	beta lactam	-3.08826	25.113	-0.171821	0.0144813	1.25203
OXA-45	beta lactam	-4.82713	25.0251	-0.158288	0.0244528	2.1292
DHA-1	beta lactam	1.57767	24.6562	0.140542	0.0460439	0.785894
OXA-21	beta lactam	2.00358	24.7312	0.140849	0.0455655	0.995833
VEB-1	beta lactam	2.219	24.6989	0.159405	0.0234498	0.971741
MOX-3	beta lactam	2.621	24.7219	0.166602	0.0178003	1.09688
PER-1	beta lactam	2.78966	24.7362	0.166759	0.0176911	1.16633
NDM-1	beta lactam	2.63569	24.6425	0.193259	0.0058566	0.946183
CfxA3	beta lactam	1.71766	24.0622	0.202132	0.00391611	0.588478
FosB	fosfomycin	-2.975	25.0915	-0.15889	0.0239078	1.30714
FosD	fosfomycin	2.13193	24.7501	0.13931	0.0480049	1.07157
FosC2	fosfomycin	2.69083	24.6365	0.197302	0.00488525	0.945407
vanSC	glycopeptide	-4.2337	25.202	-0.244523	0.000452938	1.18713
vanWG	glycopeptide	-3.44369	25.2023	-0.218895	0.00174909	1.08545
vanXYC	glycopeptide	-3.08682	25.2352	-0.216999	0.00192186	0.981893
vanZF	glycopeptide	-4.09709	25.1121	-0.198963	0.00453006	1.42698
vanRG	glycopeptide	-3.28984	25.1576	-0.196659	0.00502928	1.15979
vanC	glycopeptide	-3.38821	25.1476	-0.195691	0.00525354	1.20062
vanTC	glycopeptide	-3.47418	25.1359	-0.193293	0.00584763	1.24696
cmeB	MDR	-8.4557	25.1807	-0.33787	8.76003e-07	1.66557
efrB	MDR	-1.8036	25.1528	-0.139796	0.0472229	0.903329
Escherichia_coli_mdfA	MDR	1.74249	23.4631	0.14975	0.0334081	0.813512
ErmX	MLSB	-2.94941	26.156	-0.342147	6.23186e-07	0.572759
mphL	MLSB	-4.07597	25.091	-0.1871	0.00766976	1.51323
vatD	MLSB	4.86335	24.8573	0.138458	0.0493996	2.45979
cfrC	MLSB	1.95488	24.7263	0.140432	0.0462166	0.974573
mphF	MLSB	2.29886	24.7475	0.146125	0.0379781	1.10049
mefC	MLSB	1.9235	24.682	0.151611	0.0312487	0.886739
lsaB	MLSB	2.36174	24.7191	0.15837	0.0243777	1.04118
Erm(35)	MLSB	2.46439	24.7099	0.165254	0.0187582	1.03999
vgaE	MLSB	2.41668	24.6903	0.16989	0.0156405	0.991238
ErmY	MLSB	2.56876	24.6879	0.176491	0.0119848	1.01301
msrC	MLSB	2.49933	24.6697	0.179544	0.0105649	0.968332
vgaC	MLSB	3.71391	24.7457	0.189618	0.00687552	1.35984
linG	MLSB	2.16472	23.3864	0.230512	0.000965412	0.646156
Bifidobacteria_intrinsic_ileS_conferring_resistance_to_mupirocin	mupirocin	-3.86761	25.4082	-0.299775	1.46247e-05	0.870331
SAT-1	nucleoside	1.84602	24.2533	0.20934	0.00278958	0.609729
catB2	phenicol	2.34101	24.7441	0.148804	0.0345525	1.10004
Bifidobacterium_adolescentis_rpoB_conferring_resistance_to_rifampicin	rifamycin	-4.25252	25.6032	-0.365463	8.88719e-08	0.765874
tet(H)	tetracycline	1.68603	24.6875	0.13915	0.0482639	0.848439
tet36	tetracycline	1.77064	24.6578	0.150212	0.0328599	0.82405
tet(33)	tetracycline	2.36078	24.614	0.189084	0.00703761	0.866925
dfrA19	trimethoprim	3.23924	24.8013	0.148691	0.0346915	1.52331
dfrA1	trimethoprim	1.28954	24.2401	0.151394	0.0314941	0.595357
dfrA16	trimethoprim	1.9558	24.6681	0.156647	0.0259929	0.871952
dfrA20	trimethoprim	2.58141	24.7379	0.159302	0.0235415	1.1312
Campylobacter_coli		-12.328	25.1709	-0.330151	1.59913e-06	2.49233
Alistipes_sp_An66		-6.48765	25.1719	-0.230946	0.000943635	1.93267
Faecalibacterium_prausnitzii		-7.01645	25.198	-0.225645	0.00124287	2.14205
Halomonas_campaniensis		-8.59937	25.0115	-0.192958	0.00593532	3.09207
Enorma_massiliensis		-9.57204	25.0642	-0.182368	0.00938586	3.64919
Bacillus_cereus_group		-7.85777	25.0994	-0.177356	0.0115664	3.08318
Eubacterium_sp_CAG_180		-10.168	24.9939	-0.171	0.0149648	4.14267
Streptococcus_infantarius		-9.46504	24.9984	-0.170058	0.0155362	3.87826
Romboutsia_ilealis		-8.45208	25.0446	-0.170055	0.0155379	3.46327
Mycoplasma_yeatsii		-9.74072	24.9901	-0.165879	0.0183082	4.09473
Enterococcus_cecorum		-4.97498	25.1983	-0.165439	0.0186239	2.09707
Prevotella_sp_AM42_24		-8.70086	24.9961	-0.153762	0.028902	3.95368
Lactobacillus_aviarius		-3.32918	25.3916	-0.151827	0.0310062	1.53253
Bacteroides_stercoris		-4.35371	25.0852	-0.14513	0.0393208	2.09876
Helicobacter_pullorum		-4.51289	25.0366	-0.140727	0.0457544	2.24501
Staphylococcus_chromogenes		-8.34663	24.9916	-0.140603	0.0459481	4.15591
Bacteroides_xylanisolvens		6.07657	24.7485	0.14072	0.0457658	3.02304
Alcaligenes_faecalis		5.39161	24.814	0.147739	0.0358814	2.5522
Clostridium_paraputrificum		9.08063	24.8794	0.150908	0.0320504	4.20618
Sellimonas_intestinalis		7.01359	24.8496	0.158398	0.0243524	3.09141
Clostridium_sp_7_2_43FAA		10.075	24.86	0.17692	0.0117756	3.96324
Acinetobacter_radioresistens		8.45584	24.8423	0.186773	0.00777856	3.14497
Paraclostridium_benzoelyticum		9.33584	24.8494	0.190793	0.00653061	3.39644
