# Supplementary material for: Machine learning and metagenomics enhance surveillance of antimicrobial resistance in chicken production in China
Source: Research Square preprint supplement (doi:10.21203/rs.3.rs-2458989/v1), 2023-01-13
Supplement: Supplementary file 7 [file c3623521c74c3b6d3d7cb14a.xlsx]

## Sheet: Sheet1
Sample ID	SRA ID	BioSample	BioProject	Reads counts (paired reads)	Reads counts	Filtered reads		Number of contigs	Number of contigs (>= 1000 bp)	# contigs (>= 50000 bp)	Total length	Total length (>= 1000 bp)	GC (%)	N50	Timepoint	Sample Collection Date	Sample Source	Sample Collection Place	Cultured E.coli	E.coli ID	AMP	AMS	TET	CHL	SXT	CFZ	CTX	CAZ	CFX	GEN	IMI	NAL	Sul	CIP	AMC	CTX-C	CAZ-C	MIN	AMI	AZM	FEP	MEM	LEV	DOX	KAN	STR
HAYS1JTT3-10	SRR20950884	SAMN28667168	PRJNA841806	44347010	88694020	1895596	HAYS1JTT3-10	56795	7834	0	38580125	15230295	48.64	1143	t3	2020.07.13	Chicken carcass	Henan 1
HAYS1JTT3-11	SRR20950895	SAMN28667167	PRJNA841806	46081891	92163782	2151612	HAYS1JTT3-11	72071	7421	0	44083491	14023611	45.36	971	t3	2020.07.13	Chicken carcass	Henan 1
HAYS1JTT3-12	SRR20950775	SAMN28667166	PRJNA841806	42525330	85050660	1219240	HAYS1JTT3-12	36328	3968	0	22089623	6452789	49.48	904	t3	2020.07.13	Chicken carcass	Henan 1
HAYS1JTT3-3	SRR20950749	SAMN28667165	PRJNA841806	46414749	92829498	1755512	HAYS1JTT3-3	48559	5559	0	31526060	10809547	46.87	1007	t3	2020.07.13	Chicken carcass	Henan 1
HAYS1JTT3-5	SRR20950997	SAMN28667164	PRJNA841806	41736824	83473648	1762662	HAYS1JTT3-5	54275	5237	0	33315462	10220453	47.42	959	t3	2020.07.13	Chicken carcass	Henan 1
HAYS1JTT3-6	SRR20950998	SAMN28667163	PRJNA841806	42157866	84315732	4020477	HAYS1JTT3-6	151953	15573	0	96910531	31587334	52.10	986	t3	2020.07.13	Chicken carcass	Henan 1
HAYS1JFT1-1	SRR20950737	SAMN28667184	PRJNA841806	40206324	80412648	40102870	HAYS1JFT1-1	50873	4835	90	45945258	24540127	46.61	4929	t1	2020.06.19	Chicken faeces	Henan 1	Yes	HAYS1JFT1-1	R	R	R	R	R	I	S	S	S	S	S	R	R	R	S	S	S	S	S	S	S	S	S	I	S	R
HAYS1JFT1-2	SRR20950748	SAMN28667183	PRJNA841806	40055635	80111270	40025239	HAYS1JFT1-2	220299	44142	201	225673749	141608838	44.89	2493	t1	2020.06.19	Chicken faeces	Henan 1	Yes	HAYS1JFT1-2	R	R	R	R	R	R	R	R	S	R	S	R	R	R	I	R	R	S	S	R	R	S	R	I	R	R
HAYS1JFT1-3	SRR20950760	SAMN28667182	PRJNA841806	43633756	87267512	43625349	HAYS1JFT1-3	237509	33524	141	201704086	104031458	48.55	1838	t1	2020.06.19	Chicken faeces	Henan 1	Yes	HAYS1JFT1-3	S	S	S	S	S	S	S	S	S	S	S	R	S	S	S	S	S	S	S	S	S	S	S	S	S	S
HAYS1JFT1-4	SRR20950844	SAMN28667181	PRJNA841806	42770098	85540196	42763661	HAYS1JFT1-4	50615	7639	189	75689207	57442658	47.90	20067	t1	2020.06.19	Chicken faeces	Henan 1	Yes	HAYS1JFT1-4	R	R	R	R	R	R	S	S	S	R	S	R	R	R	S	S	S	S	S	S	S	S	R	I	R	R
HAYS1JFT1-5	SRR20950855	SAMN28667180	PRJNA841806	45382891	90765782	45297695	HAYS1JFT1-5	186627	65412	486	351784802	269563689	47.17	4240	t1	2020.06.19	Chicken faeces	Henan 1	Yes	HAYS1JFT1-5	R	R	R	R	R	R	R	R	S	R	S	R	R	R	S	R	R	S	R	R	R	S	R	I	R	R
HAYS1JFT1-6	SRR20950866	SAMN28667179	PRJNA841806	42070207	84140414	42055172	HAYS1JFT1-6	229120	41414	255	246501566	158815586	45.56	3837	t1	2020.06.19	Chicken faeces	Henan 1	Yes	HAYS1JFT1-6	R	R	R	R	S	R	R	R	I	R	S	R	R	R	S	R	R	S	R	R	R	S	R	R	R	R
HAYS1JFT1-7	SRR20950909	SAMN28667178	PRJNA841806	58151778	116303556	58104304	HAYS1JFT1-7	123989	23297	261	141509484	92617483	46.79	3573	t1	2020.06.19	Chicken faeces	Henan 1	Yes	HAYS1JFT1-7	R	I	R	S	S	R	S	S	S	S	S	S	S	S	S	S	S	S	S	S	S	S	S	I	S	S
HAYS1JFT1-8	SRR20950920	SAMN28667177	PRJNA841806	43267206	86534412	43238467	HAYS1JFT1-8	485977	101563	427	535224524	347211014	48.99	2920	t1	2020.06.19	Chicken faeces	Henan 1	Yes	HAYS1JFT1-8	R	R	R	R	R	R	R	S	S	R	S	R	R	R	S	R	S	S	S	S	S	S	S	S	S	S
HAYS1JFT2-1	SRR20950931	SAMN28667176	PRJNA841806	43708402	87416804	43679201	HAYS1JFT2-1	163934	24703	126	151909123	87148844	43.28	2611	t2	2020.07.09	Chicken faeces	Henan 1	Yes	HAYS1JFT2-1	R	I	R	R	R	R	R	R	S	R	S	R	R	R	S	R	R	S	S	R	R	S	R	I	R	R
HAYS1JFT2-2	SRR20950974	SAMN28667175	PRJNA841806	45060166	90120332	45035781	HAYS1JFT2-2	82149	30551	114	135313742	99962558	47.02	2423	t2	2020.07.09	Chicken faeces	Henan 1	Yes	HAYS1JFT2-2	R	R	R	R	R	R	R	S	I	R	S	R	R	R	S	R	S	R	S	R	I	S	R	R	R	R
HAYS1JFT2-3	SRR20950985	SAMN28667174	PRJNA841806	42529739	85059478	42517397	HAYS1JFT2-3	640871	122574	441	650408466	400749287	50.53	2591	t2	2020.07.09	Chicken faeces	Henan 1	Yes	HAYS1JFT2-3	R	R	R	R	R	R	S	S	S	R	S	R	R	R	I	S	S	S	S	S	S	S	R	I	R	R
HAYS1JFT2-4	SRR20950996	SAMN28667173	PRJNA841806	47067050	94134100	47023514	HAYS1JFT2-4	247436	40901	221	236664112	135235607	48.48	2190	t2	2020.07.09	Chicken faeces	Henan 1	Yes	HAYS1JFT2-4	R	I	R	R	R	R	R	I	S	R	S	R	R	R	S	R	S	S	R	R	R	S	R	I	R	R
HAYS1JFT2-5	SRR20950639	SAMN28667172	PRJNA841806	47489170	94978340	47473213	HAYS1JFT2-5	401061	81834	604	491620084	339363822	51.44	4637	t2	2020.07.09	Chicken faeces	Henan 1	Yes	HAYS1JFT2-5	R	R	R	R	R	R	R	R	S	R	S	R	R	R	I	R	R	S	S	R	R	S	R	R	R	R
HAYS1JFT2-6	SRR20950650	SAMN28667171	PRJNA841806	42484317	84968634	42452227	HAYS1JFT2-6	201518	31897	245	198756152	114980561	44.54	2449	t2	2020.07.09	Chicken faeces	Henan 1	Yes	HAYS1JFT2-6	R	R	R	R	R	R	R	S	S	R	S	R	R	R	I	R	S	S	S	R	I	S	R	I	R	R
HAYS1JFT2-7	SRR20950661	SAMN28667170	PRJNA841806	55817090	111634180	55794547	HAYS1JFT2-7	792982	157343	603	816992334	508473811	49.30	2500	t2	2020.07.09	Chicken faeces	Henan 1	Yes	HAYS1JFT2-7	R	R	R	R	R	R	R	R	R	R	S	R	R	R	R	S	S	S	S	R	R	S	R	I	R	R
HAYS1JFT2-8	SRR20950873	SAMN28667169	PRJNA841806	47101224	94202448	47044131	HAYS1JFT2-8	228195	38128	157	233014670	141362098	44.66	3281	t2	2020.07.09	Chicken faeces	Henan 1	Yes	HAYS1JFT2-8	R	I	R	R	R	S	S	S	S	S	S	S	R	R	S	S	S	S	S	S	S	S	I	I	R	R
HAYS1TRT1-1	SRR20950725	SAMN28667188	PRJNA841806	42978764	85957528	85957528	HAYS1TRT1-1	1443298	141458	43	900647599	254904065	62.23	874	t1	2020.06.19	Soil	Henan 1
HAYS1TRT1-2	SRR20950809	SAMN28667187	PRJNA841806	45334327	90668654	90668654	HAYS1TRT1-2	1476072	162596	39	958959135	315742862	63.05	965	t1	2020.06.19	Soil	Henan 1
HAYS1TRT2-1	SRR20950820	SAMN28667186	PRJNA841806	45575663	91151326	91151326	HAYS1TRT2-1	1356721	126088	30	838348305	232550839	64.51	869	t2	2020.07.09	Soil	Henan 1
HAYS1TRT2-2	SRR20950831	SAMN28667185	PRJNA841806	46200896	92401792	92401792	HAYS1TRT2-2	1463946	154351	62	949332313	307583762	62.87	951	t2	2020.07.09	Soil	Henan 1
HAYS1TWT3-1	SRR20950797	SAMN28667191	PRJNA841806	44176464	88352928	88352928	HAYS1TWT3-1	849792	199868	27	829892388	394568611	50.95	955	t3	2020.07.13	Wastewater	Henan 1
HAYS1TWT3-2	SRR20950703	SAMN28667190	PRJNA841806	45878305	91756610	91756610	HAYS1TWT3-2	712772	190941	838	1228097025	1008662843	42.74	7907	t3	2020.07.13	Wastewater	Henan 1
HAYS1TWT3-3	SRR20950714	SAMN28667189	PRJNA841806	43150253	86300506	86300506	HAYS1TWT3-3	1092228	120934	120	705990759	322569489	48.65	1718	t3	2020.07.13	Wastewater	Henan 1
HAYS2JTT3-11	SRR20950900	SAMN28667199	PRJNA841806	42795374	85590748	36556788	HAYS2JTT3-11	974069	99766	99	601202991	225673072	45.29	1185	t3	2020.09.22	Chicken carcass	Henan 2
HAYS2JTT3-12	SRR20950678	SAMN28667198	PRJNA841806	41857613	83715226	41810361	HAYS2JTT3-12	840259	112021	40	581843085	262026881	42.57	1397	t3	2020.09.22	Chicken carcass	Henan 2
HAYS2JTT3-13	SRR20950689	SAMN28667197	PRJNA841806	42744026	85488052	42658796	HAYS2JTT3-13	787172	94493	48	519718262	221168889	41.64	1355	t3	2020.09.22	Chicken carcass	Henan 2
HAYS2JTT3-14	SRR20950700	SAMN28667196	PRJNA841806	43172730	86345460	43126759	HAYS2JTT3-14	887507	102191	58	574338204	247603481	41.49	1444	t3	2020.09.22	Chicken carcass	Henan 2
HAYS2JTT3-15	SRR20950944	SAMN28667195	PRJNA841806	42560121	85120242	42550743	HAYS2JTT3-15	864615	117898	41	591157937	267319057	45.41	1408	t3	2020.09.22	Chicken carcass	Henan 2
HAYS2JTT3-4	SRR20950955	SAMN28667194	PRJNA841806	42084591	84169182	41328960	HAYS2JTT3-4	902596	115642	41	614498682	271749668	41.72	1388	t3	2020.09.22	Chicken carcass	Henan 2
HAYS2JTT3-6	SRR20950966	SAMN28667193	PRJNA841806	41738529	83477058	41553312	HAYS2JTT3-6	890057	115028	81	629600483	283565676	43.07	1421	t3	2020.09.22	Chicken carcass	Henan 2
HAYS2JTT3-8	SRR20950786	SAMN28667192	PRJNA841806	40782904	81565808	39445668	HAYS2JTT3-8	974405	124464	71	663260545	299543784	44.66	1462	t3	2020.09.22	Chicken carcass	Henan 2
HAYS2JFT1-11	SRR20950881	SAMN28667215	PRJNA841806	40690682	81381364	40250000	HAYS2JFT1-11	400623	73277	403	435429423	272135741	47.37	3173	t1	2020.08.27	Chicken faeces	Henan 2	Yes	HAYS2JFT1-11	R	I	R	R	R	R	R	S	S	R	S	R	R	R	S	R	S	S	S	R	R	S	R	I	R	R
HAYS2JFT1-12	SRR20950882	SAMN28667214	PRJNA841806	41455718	82911436	41406609	HAYS2JFT1-12	227623	44838	190	233573400	142436213	46.30	2382	t1	2020.08.27	Chicken faeces	Henan 2	Yes	HAYS2JFT1-12	R	R	R	R	R	R	R	S	S	R	S	R	R	R	I	R	S	S	S	R	S	S	R	I	R	R
HAYS2JFT1-13	SRR20950883	SAMN28667213	PRJNA841806	40635037	81270074	40621787	HAYS2JFT1-13	316726	67274	406	378639117	254116312	48.80	3650	t1	2020.08.27	Chicken faeces	Henan 2	Yes	HAYS2JFT1-13	R	R	R	R	R	R	R	S	S	R	S	R	R	R	S	R	S	S	S	R	R	S	R	I	R	R
HAYS2JFT1-14	SRR20950885	SAMN28667212	PRJNA841806	42275841	84551682	42236901	HAYS2JFT1-14	90967	12729	95	83223541	45850929	45.51	2496	t1	2020.08.27	Chicken faeces	Henan 2	Yes	HAYS2JFT1-14	R	R	R	R	R	R	R	R	I	R	S	R	R	R	S	R	R	S	R	R	R	S	R	I	R	R
HAYS2JFT1-15	SRR20950886	SAMN28667211	PRJNA841806	39576482	79152964	39534537	HAYS2JFT1-15	52086	11870	95	66504816	46487381	46.99	3980	t1	2020.08.27	Chicken faeces	Henan 2	Yes	HAYS2JFT1-15	R	I	R	R	R	R	R	R	S	R	S	R	R	R	S	R	R	I	S	R	R	S	R	R	R	R
HAYS2JFT1-4	SRR20950887	SAMN28667210	PRJNA841806	39040241	78080482	38995303	HAYS2JFT1-4	198253	29513	150	178182117	95558829	45.23	1987	t1	2020.08.27	Chicken faeces	Henan 2	Yes	HAYS2JFT1-4	R	R	R	R	S	R	R	R	S	R	S	R	R	R	S	R	R	S	S	R	R	S	R	R	R	R
HAYS2JFT1-6	SRR20950888	SAMN28667209	PRJNA841806	43753589	87507178	43709419	HAYS2JFT1-6	21065	3174	51	24664720	16155123	38.33	8822	t1	2020.08.27	Chicken faeces	Henan 2	Yes	HAYS2JFT1-6	R	R	R	R	R	R	R	R	I	R	S	R	R	R	S	R	R	S	S	R	R	S	R	R	R	R
HAYS2JFT1-8	SRR20950889	SAMN28667208	PRJNA841806	42015456	84030912	41954550	HAYS2JFT1-8	351841	64137	252	335953791	191476644	47.66	1885	t1	2020.08.27	Chicken faeces	Henan 2	Yes	HAYS2JFT1-8	R	R	R	R	R	R	R	S	S	R	S	R	R	R	S	R	S	S	S	I	S	S	R	I	R	R
HAYS2JFT2-11	SRR20950890	SAMN28667207	PRJNA841806	40164271	80328542	40088779	HAYS2JFT2-11	42920	6903	78	51737648	34825761	43.68	8034	t2	2020.09.17	Chicken faeces	Henan 2	Yes	HAYS2JFT2-11	R	R	R	R	S	R	R	R	S	R	S	R	R	R	S	R	R	S	S	R	R	S	R	I	R	R
HAYS2JFT2-12	SRR20950891	SAMN28667206	PRJNA841806	42302981	84605962	42266906	HAYS2JFT2-12	64751	7593	73	59429305	33082099	43.05	4286	t2	2020.09.17	Chicken faeces	Henan 2	Yes	HAYS2JFT2-12	R	R	R	R	R	R	R	S	S	R	S	S	R	I	I	R	S	S	R	R	I	S	I	I	R	R
HAYS2JFT2-13	SRR20950892	SAMN28667205	PRJNA841806	43718231	87436462	43692317	HAYS2JFT2-13	414596	59846	261	356936719	183178064	48.01	1749	t2	2020.09.17	Chicken faeces	Henan 2	Yes	HAYS2JFT2-13	R	I	R	R	R	R	R	I	S	I	S	R	R	R	S	R	S	S	S	R	R	S	R	I	R	R
HAYS2JFT2-14	SRR20950893	SAMN28667204	PRJNA841806	44226061	88452122	44156861	HAYS2JFT2-14	525844	102568	449	547429316	339443217	47.52	2630	t2	2020.09.17	Chicken faeces	Henan 2	Yes	HAYS2JFT2-14	R	R	R	R	R	R	R	S	S	R	S	R	R	R	S	R	S	S	S	R	S	S	R	I	S	S
HAYS2JFT2-15	SRR20950894	SAMN28667203	PRJNA841806	43365446	86730892	43303590	HAYS2JFT2-15	42227	6434	78	47249952	30604873	42.34	6372	t2	2020.09.17	Chicken faeces	Henan 2	Yes	HAYS2JFT2-15	R	I	R	R	R	R	R	S	S	R	S	R	R	R	S	R	S	S	S	R	I	S	R	I	R	R
HAYS2JFT2-4	SRR20950896	SAMN28667202	PRJNA841806	41125799	82251598	40178219	HAYS2JFT2-4	522350	98476	512	536669649	326414486	49.05	2431	t2	2020.09.17	Chicken faeces	Henan 2	Yes	HAYS2JFT2-4	R	R	R	R	R	R	R	I	S	R	S	R	R	R	S	R	S	I	S	R	R	S	R	R	R	R
HAYS2JFT2-6	SRR20950897	SAMN28667201	PRJNA841806	40962143	81924286	40835105	HAYS2JFT2-6	181124	31498	119	168617743	93914411	48.36	1858	t2	2020.09.17	Chicken faeces	Henan 2	Yes	HAYS2JFT2-6	R	I	R	R	S	R	R	S	S	R	S	R	R	R	S	R	S	I	S	I	S	S	R	R	R	R
HAYS2JFT2-8	SRR20950898	SAMN28667200	PRJNA841806	42181700	84363400	42150518	HAYS2JFT2-8	464084	83174	494	472316196	283413720	49.56	2456	t2	2020.09.17	Chicken faeces	Henan 2	Yes	HAYS2JFT2-8	R	I	R	R	R	R	R	I	S	R	S	R	R	R	S	R	S	S	S	R	R	S	R	I	R
HAYS2YMT1-1	SRR20950880	SAMN28667216	PRJNA841806	43349244	86698488	42717809	HAYS2YMT1-1	819990	158066	578	843001368	531055017	50.06	2831	t1	2020.08.27	Chicken Feather	Henan 2
HAYS2YMT1-2	SRR20950879	SAMN28667217	PRJNA841806	47357917	94715834	45447825	HAYS2YMT1-2	915832	165964	359	875298261	524353398	50.09	2458	t1	2020.08.27	Chicken Feather	Henan 2
HAYS2YMT1-3	SRR20950878	SAMN28667218	PRJNA841806	44742171	89484342	43830923	HAYS2YMT1-3	844128	169873	495	851374999	526733539	49.84	2380	t1	2020.08.27	Chicken Feather	Henan 2
HAYS2YMT1-4	SRR20950877	SAMN28667219	PRJNA841806	42483137	84966274	40131422	HAYS2YMT1-4	856722	164622	426	821477066	484695284	50.34	2114	t1	2020.08.27	Chicken Feather	Henan 2
HAYS2YMT1-5	SRR20950876	SAMN28667220	PRJNA841806	41584929	83169858	36835425	HAYS2YMT1-5	755177	140744	339	735879321	446056510	50.39	2511	t1	2020.08.27	Chicken Feather	Henan 2
HAYS2YMT2-1	SRR20950875	SAMN28667221	PRJNA841806	40820870	81641740	40541625	HAYS2YMT2-1	985994	180671	269	887034480	501345922	51.37	1917	t2	2020.09.17	Chicken Feather	Henan 2
HAYS2YMT2-2	SRR20950874	SAMN28667222	PRJNA841806	46366268	92732536	46129780	HAYS2YMT2-2	1150712	195832	360	1010263834	566779302	50.54	2012	t2	2020.09.17	Chicken Feather	Henan 2
HAYS2YMT2-3	SRR20950872	SAMN28667223	PRJNA841806	53895565	107791130	53337477	HAYS2YMT2-3	1024433	174100	335	902254414	505155069	51.09	2012	t2	2020.09.17	Chicken Feather	Henan 2
HAYS2YMT2-4	SRR20950871	SAMN28667224	PRJNA841806	48431132	96862264	47724028	HAYS2YMT2-4	1193622	212411	307	1050118582	588549722	50.32	1922	t2	2020.09.17	Chicken Feather	Henan 2
HAYS2YMT2-5	SRR20950669	SAMN28667225	PRJNA841806	46169783	92339566	45641961	HAYS2YMT2-5	1073594	183436	315	944635641	530725469	50.84	2037	t2	2020.09.17	Chicken Feather	Henan 2
HAYS2TMT3-1	SRR20950666	SAMN28667228	PRJNA841806	40171620	80343240	80343240	HAYS2TMT3-1	1388386	270457	21	1030281890	459529403	44.54	1106	t3	2020.09.22	Processing Line	Henan 2
HAYS2TMT3-2	SRR20950667	SAMN28667227	PRJNA841806	38926967	77853934	77853934	HAYS2TMT3-2	328337	160310	276	1041511960	971120744	41.85	9058	t3	2020.09.22	Processing Line	Henan 2
HAYS2TMT3-3	SRR20950668	SAMN28667226	PRJNA841806	41325927	82651854	82651854	HAYS2TMT3-3	1453211	128237	82	862799289	245940859	42.04	898	t3	2020.09.22	Processing Line	Henan 2
HAYS2TRT1-1	SRR20950662	SAMN28667232	PRJNA841806	54325687	108651374	108651374	HAYS2TRT1-1	1603848	106267	32	899158658	180898930	64.18	780	t1	2020.08.27	Soil	Henan 2
HAYS2TRT1-2	SRR20950663	SAMN28667231	PRJNA841806	53922455	107844910	107844910	HAYS2TRT1-2	1714183	173446	59	1097015848	352306496	63.03	962	t1	2020.08.27	Soil	Henan 2
HAYS2TRT2-1	SRR20950664	SAMN28667230	PRJNA841806	44699251	89398502	89398502	HAYS2TRT2-1	1185253	77213	20	659070905	130801175	65.41	780	t2	2020.09.17	Soil	Henan 2
HAYS2TRT2-2	SRR20950665	SAMN28667229	PRJNA841806	48370211	96740422	96740422	HAYS2TRT2-2	1445173	125778	16	866947304	241244097	63.16	901	t2	2020.09.17	Soil	Henan 2
HAYS2TWT3-1	SRR20950658	SAMN28667235	PRJNA841806	41338914	82677828	82677828	HAYS2TWT3-1	989346	105180	30	619200637	240133799	44.95	1258	t3	2020.09.22	Wastewater	Henan 2
HAYS2TWT3-2	SRR20950659	SAMN28667234	PRJNA841806	42107848	84215696	84215696	HAYS2TWT3-2	699785	98212	133	521654377	262984660	44.72	1773	t3	2020.09.22	Wastewater	Henan 2
HAYS2TWT3-3	SRR20950660	SAMN28667233	PRJNA841806	41905190	83810380	83810380	HAYS2TWT3-3	725145	103154	139	553203398	282306340	44.82	1809	t3	2020.09.22	Wastewater	Henan 2
HAYS3HCT2-1	SRR20950656	SAMN28667237	PRJNA841806	39474464	78948928	78948928	HAYS3HCT2-1	1203619	221526	160	990702452	509302242	46.63	1427	t2	2021.04.23	Barn Floor	Henan 3
HAYS3HCT2-2	SRR20950657	SAMN28667236	PRJNA841806	43064200	86128400	86128400	HAYS3HCT2-2	432323	144776	283	630532035	436690099	51.75	1984	t2	2021.04.23	Barn Floor	Henan 3
HAYS3JTT3-1	SRR20950648	SAMN28667244	PRJNA841806	45494626	90989252	941328	HAYS3JTT3-1	23832	2376	0	14159429	3932251	50.36	885	t3	2021.04.27	Chicken carcass	Henan 3
HAYS3JTT3-11	SRR20950644	SAMN28667248	PRJNA841806	42964575	85929150	6056187	HAYS3JTT3-11	264255	29808	31	171432012	67239675	39.96	1188	t3	2021.04.27	Chicken carcass	Henan 3
HAYS3JTT3-12	SRR20950645	SAMN28667247	PRJNA841806	40605293	81210586	2468024	HAYS3JTT3-12	104393	11834	0	66378557	23795357	41.01	1059	t3	2021.04.27	Chicken carcass	Henan 3
HAYS3JTT3-14	SRR20950646	SAMN28667246	PRJNA841806	45884210	91768420	3637952	HAYS3JTT3-14	143163	17161	32	99376416	42887649	42.39	1363	t3	2021.04.27	Chicken carcass	Henan 3
HAYS3JTT3-15	SRR20950647	SAMN28667245	PRJNA841806	45530767	91061534	2896394	HAYS3JTT3-15	125193	15387	1	82333647	32123498	42.14	1149	t3	2021.04.27	Chicken carcass	Henan 3
HAYS3JTT3-2	SRR20950649	SAMN28667243	PRJNA841806	45923040	91846080	1598645	HAYS3JTT3-2	53993	5948	0	34189676	11532163	43.84	1003	t3	2021.04.27	Chicken carcass	Henan 3
HAYS3JTT3-3	SRR20950651	SAMN28667242	PRJNA841806	46202586	92405172	2354519	HAYS3JTT3-3	99045	9158	0	56566661	16054140	42.55	926	t3	2021.04.27	Chicken carcass	Henan 3
HAYS3JTT3-4	SRR20950652	SAMN28667241	PRJNA841806	44963542	89927084	1887431	HAYS3JTT3-4	67543	5827	0	38153021	10679766	45.65	929	t3	2021.04.27	Chicken carcass	Henan 3
HAYS3JTT3-7	SRR20950653	SAMN28667240	PRJNA841806	43657989	87315978	1542477	HAYS3JTT3-7	49685	5977	0	31735410	11459948	44.64	1076	t3	2021.04.27	Chicken carcass	Henan 3
HAYS3JTT3-8	SRR20950654	SAMN28667239	PRJNA841806	47494867	94989734	2588387	HAYS3JTT3-8	107145	10326	0	61255802	18619522	43.26	978	t3	2021.04.27	Chicken carcass	Henan 3
HAYS3JTT3-9	SRR20950655	SAMN28667238	PRJNA841806	44755360	89510720	1621198	HAYS3JTT3-9	56889	5676	0	33363935	10599784	45.15	1010	t3	2021.04.27	Chicken carcass	Henan 3
HAYS3JFT1-1	SRR20950991	SAMN28667267	PRJNA841806	42940171	85880342	41055360	HAYS3JFT1-1	40581	7101	30	39238284	24230554	43.25	2829	t1	2021.04.07	Chicken faeces	Henan 3	Yes	HAYS3JFT1-1	R	I	R	R	R	I	S	S	S	R	S	R	R	R	I	S	S	R	S	S	S	S	R	R	R	R
HAYS3JFT1-11	SRR20950986	SAMN28667272	PRJNA841806	44987420	89974840	44849298	HAYS3JFT1-11	95231	14691	99	90870957	51480977	45.23	2440	t1	2021.04.07	Chicken faeces	Henan 3	Yes	HAYS3JFT1-11	R	I	R	R	S	R	R	S	S	I	S	R	R	R	S	R	S	I	S	I	I	S	R	I	R	R
HAYS3JFT1-12	SRR20950987	SAMN28667271	PRJNA841806	42370106	84740212	42286222	HAYS3JFT1-12	70109	12124	98	81555354	54525442	45.53	5638	t1	2021.04.07	Chicken faeces	Henan 3	Yes	HAYS3JFT1-12	R	S	R	R	R	R	R	I	S	R	S	R	R	R	S	R	S	R	S	R	R	S	R	R	R	R
HAYS3JFT1-13	SRR20950988	SAMN28667270	PRJNA841806	39550830	79101660	39313432	HAYS3JFT1-13	56241	10980	65	63106018	42508579	41.44	4158	t1	2021.04.07	Chicken faeces	Henan 3	Yes	HAYS3JFT1-13	R	I	R	R	S	R	R	S	S	R	S	R	R	R	S	R	S	I	S	R	I	S	R	R	R	R
HAYS3JFT1-14	SRR20950989	SAMN28667269	PRJNA841806	43284700	86569400	42960277	HAYS3JFT1-14	256069	59599	175	302015209	205982955	51.14	3272	t1	2021.04.07	Chicken faeces	Henan 3	Yes	HAYS3JFT1-14	R	R	I	R	S	R	R	R	S	R	S	R	R	R	R	R	R	I	S	R	R	S	R	I	R	R
HAYS3JFT1-15	SRR20950990	SAMN28667268	PRJNA841806	41780956	83561912	41691951	HAYS3JFT1-15	411831	89160	391	468965623	315465492	48.60	3289	t1	2021.04.07	Chicken faeces	Henan 3	Yes	HAYS3JFT1-15	R	R	R	R	S	R	R	S	S	R	S	R	R	R	I	R	S	S	S	R	I	S	R	I	R	R
HAYS3JFT1-2	SRR20950992	SAMN28667266	PRJNA841806	119786912	239573824	117441184	HAYS3JFT1-2	358030	12571	64	194988392	38605926	45.16	766	t1	2021.04.07	Chicken faeces	Henan 3	Yes	HAYS3JFT1-2	R	R	R	R	R	R	R	R	S	R	S	R	R	R	R	R	R	S	R	R	R	S	R	I	R	R
HAYS3JFT1-3	SRR20950993	SAMN28667265	PRJNA841806	142666635	285333270	142061803	HAYS3JFT1-3	25199	5882	50	37091711	28497633	42.84	7582	t1	2021.04.07	Chicken faeces	Henan 3	Yes	HAYS3JFT1-3	R	R	R	R	S	R	R	S	S	R	S	R	R	R	I	R	S	I	S	R	I	S	R	R	R	R
HAYS3JFT1-4	SRR20950994	SAMN28667264	PRJNA841806	43090590	86181180	42845861	HAYS3JFT1-4	58595	9754	119	70268103	47117909	44.02	7057	t1	2021.04.07	Chicken faeces	Henan 3	Yes	HAYS3JFT1-4	R	R	R	R	R	R	R	I	S	S	S	R	S	R	I	R	S	S	S	R	R	S	R	I	S	R
HAYS3JFT1-7	SRR20950995	SAMN28667263	PRJNA841806	48124080	96248160	47415633	HAYS3JFT1-7	151762	22939	73	131182667	68098153	47.46	1760	t1	2021.04.07	Chicken faeces	Henan 3	Yes	HAYS3JFT1-7	R	I	R	R	R	R	R	I	S	R	S	R	R	R	S	R	S	S	S	R	R	S	R	I	R	R
HAYS3JFT1-8	SRR20950766	SAMN28667262	PRJNA841806	50152003	100304006	40889430	HAYS3JFT1-8	1738167	39685	97	847457607	83129750	46.97	680	t1	2021.04.07	Chicken faeces	Henan 3	Yes	HAYS3JFT1-8	R	I	R	R	R	R	R	I	S	R	S	R	R	R	S	R	S	S	S	R	R	S	R	I	R	R
HAYS3JFT1-9	SRR20950767	SAMN28667261	PRJNA841806	50779798	101559596	49883137	HAYS3JFT1-9	30871	4024	9	25373152	12977588	42.67	2123	t1	2021.04.07	Chicken faeces	Henan 3	Yes	HAYS3JFT1-9	R	R	R	R	R	R	R	S	S	R	S	R	S	R	R	R	S	S	S	R	I	S	R	I	R	R
HAYS3JFT2-1	SRR20950773	SAMN28667255	PRJNA841806	44961350	89922700	44850032	HAYS3JFT2-1	309854	65422	352	343265088	221101468	47.88	2723	t2	2021.04.23	Chicken faeces	Henan 3	Yes	HAYS3JFT2-1	R	R	R	R	S	R	R	S	S	R	S	R	R	R	I	R	S	I	S	R	I	S	R	R	R	R
HAYS3JFT2-11	SRR20950768	SAMN28667260	PRJNA841806	43297272	86594544	43142003	HAYS3JFT2-11	325718	64371	301	357587155	231475525	48.04	3164	t2	2021.04.23	Chicken faeces	Henan 3	Yes	HAYS3JFT2-11	R	R	R	R	R	R	R	I	S	R	S	R	R	R	R	R	S	S	R	R	I	S	R	I	R	R
HAYS3JFT2-12	SRR20950769	SAMN28667259	PRJNA841806	43953005	87906010	43678129	HAYS3JFT2-12	158056	36175	598	258134947	201365870	45.82	11318	t2	2021.04.23	Chicken faeces	Henan 3	Yes	HAYS3JFT2-12	R	R	R	R	R	R	R	S	S	R	S	R	R	R	R	R	S	S	R	R	I	S	R	I	R	R
HAYS3JFT2-13	SRR20950770	SAMN28667258	PRJNA841806	11050629	22101258	10994332	HAYS3JFT2-13	100330	15503	169	106193815	64001271	47.26	3476	t2	2021.04.23	Chicken faeces	Henan 3	Yes	HAYS3JFT2-13	R	R	R	R	R	R	R	R	S	R	S	R	R	R	R	R	R	S	R	R	R	S	R	I	R	R
HAYS3JFT2-14	SRR20950771	SAMN28667257	PRJNA841806	43744281	87488562	43638373	HAYS3JFT2-14	118895	19981	80	118563846	72165154	41.93	3120	t2	2021.04.23	Chicken faeces	Henan 3	Yes	HAYS3JFT2-14	R	R	R	R	R	R	R	I	S	R	S	R	R	R	I	R	S	S	S	R	R	S	R	I	R	R
HAYS3JFT2-15	SRR20950772	SAMN28667256	PRJNA841806	40367712	80735424	40254608	HAYS3JFT2-15	438815	79525	218	408940314	231138891	46.75	1873	t2	2021.04.23	Chicken faeces	Henan 3	Yes	HAYS3JFT2-15	R	I	R	R	S	R	R	S	S	R	S	R	R	R	I	R	S	I	S	I	S	S	R	I	R	R
HAYS3JFT2-2	SRR20950774	SAMN28667254	PRJNA841806	42569430	85138860	42432056	HAYS3JFT2-2	218736	35473	200	214182728	123457770	45.44	2356	t2	2021.04.23	Chicken faeces	Henan 3	Yes	HAYS3JFT2-2	R	R	R	R	R	I	S	S	S	R	S	R	R	R	R	S	S	S	S	S	S	S	R	I	R	R
HAYS3JFT2-3	SRR20950638	SAMN28667253	PRJNA841806	40438544	80877088	40307189	HAYS3JFT2-3	133746	22457	137	130093658	75890428	45.46	2388	t2	2021.04.23	Chicken faeces	Henan 3	Yes	HAYS3JFT2-3	R	R	R	R	R	R	R	I	S	R	S	R	R	R	R	R	S	S	S	R	R	S	R	I	R	R
HAYS3JFT2-4	SRR20950640	SAMN28667252	PRJNA841806	42219517	84439034	41988232	HAYS3JFT2-4	348161	67307	345	349782211	209554886	45.48	2162	t2	2021.04.23	Chicken faeces	Henan 3	Yes	HAYS3JFT2-4	R	R	R	R	R	R	S	S	I	S	S	R	R	R	R	S	S	R	S	S	S	S	R	R	R	S
HAYS3JFT2-7	SRR20950641	SAMN28667251	PRJNA841806	41989540	83979080	41884695	HAYS3JFT2-7	264223	48052	173	250811947	144845228	46.59	2080	t2	2021.04.23	Chicken faeces	Henan 3	Yes	HAYS3JFT2-7	R	R	R	R	S	R	R	S	I	R	S	R	R	R	I	R	S	S	S	R	I	S	R	I	R	R
HAYS3JFT2-8	SRR20950642	SAMN28667250	PRJNA841806	45994676	91989352	45880776	HAYS3JFT2-8	322528	67388	364	378686410	254494810	46.47	3757	t2	2021.04.23	Chicken faeces	Henan 3	Yes	HAYS3JFT2-8	R	I	R	R	R	I	S	S	S	R	S	R	R	R	I	S	S	I	S	S	S	S	R	R	R	R
HAYS3JFT2-9	SRR20950643	SAMN28667249	PRJNA841806	45635225	91270450	45571309	HAYS3JFT2-9	492946	103822	499	559016179	369642962	48.09	3181	t2	2021.04.23	Chicken faeces	Henan 3	Yes	HAYS3JFT2-9	R	I	R	R	R	R	R	S	S	R	S	R	R	R	S	R	S	S	R	R	I	S	R	I	R	R
HAYS3YMT1-01	SRR20950976	SAMN28667281	PRJNA841806	44474814	88949628	43200452	HAYS3YMT1-01	755712	144863	403	738243730	453950648	48.91	2476	t1	2021.04.07	Chicken Feather	Henan 3
HAYS3YMT1-02	SRR20950984	SAMN28667273	PRJNA841806	42674436	85348872	39673654	HAYS3YMT1-02	1047173	184481	224	919405514	520442922	50.01	1980	t1	2021.04.07	Chicken Feather	Henan 3
HAYS3YMT1-03	SRR20950983	SAMN28667274	PRJNA841806	41493180	82986360	36322929	HAYS3YMT1-03	692954	114638	340	645105173	378348514	50.08	2529	t1	2021.04.07	Chicken Feather	Henan 3
HAYS3YMT1-04	SRR20950982	SAMN28667275	PRJNA841806	44709497	89418994	38994186	HAYS3YMT1-04	548490	102500	305	552565397	338509175	50.06	2591	t1	2021.04.07	Chicken Feather	Henan 3
HAYS3YMT2-1	SRR20950981	SAMN28667276	PRJNA841806	45232250	90464500	45080477	HAYS3YMT2-1	887653	167394	478	876401371	539949697	48.78	2562	t2	2021.04.23	Chicken Feather	Henan 3
HAYS3YMT2-2	SRR20950980	SAMN28667277	PRJNA841806	43111091	86222182	43010621	HAYS3YMT2-2	1046746	189407	498	986692430	602747949	48.48	2566	t2	2021.04.23	Chicken Feather	Henan 3
HAYS3YMT2-3	SRR20950979	SAMN28667278	PRJNA841806	46686339	93372678	45847038	HAYS3YMT2-3	1033116	175785	392	918904583	526459992	48.60	2140	t2	2021.04.23	Chicken Feather	Henan 3
HAYS3YMT2-4	SRR20950978	SAMN28667279	PRJNA841806	42984728	85969456	42025145	HAYS3YMT2-4	1165261	196766	319	997983562	559762276	48.65	2005	t2	2021.04.23	Chicken Feather	Henan 3
HAYS3YMT2-5	SRR20950977	SAMN28667280	PRJNA841806	46209528	92419056	45461490	HAYS3YMT2-5	955298	166438	468	887539553	523793410	49.04	2347	t2	2021.04.23	Chicken Feather	Henan 3
HAYS3HJT3-1	SRR20950972	SAMN28667284	PRJNA841806	41764645	83529290	83529290	HAYS3HJT3-1	1533923	125625	65	883950117	267499696	40.61	962	t3	2021.04.27	Processing Line	Henan 3
HAYS3HJT3-2	SRR20950973	SAMN28667283	PRJNA841806	46124948	92249896	92249896	HAYS3HJT3-2	1459055	409150	81	1381090797	889701424	41.11	1824	t3	2021.04.27	Processing Line	Henan 3
HAYS3HJT3-3	SRR20950975	SAMN28667282	PRJNA841806	41715317	83430634	83430634	HAYS3HJT3-3	1243314	132783	83	782651965	315190356	41.63	1346	t3	2021.04.27	Processing Line	Henan 3
HAYS3TRT1-1	SRR20950968	SAMN28667288	PRJNA841806	45966684	91933368	91933368	HAYS3TRT1-1	467242	76865	32	397882039	142326565	62.35	791	t1	2021.04.07	Soil	Henan 3
HAYS3TRT1-3	SRR20950969	SAMN28667287	PRJNA841806	43444227	86888454	86888454	HAYS3TRT1-3	1122328	105903	17	689731476	191929652	65.05	873	t1	2021.04.07	Soil	Henan 3
HAYS3TRT2-1	SRR20950970	SAMN28667286	PRJNA841806	53665600	107331200	107331200	HAYS3TRT2-1	567795	85936	0	447521624	130847654	62.97	751	t2	2021.04.23	Soil	Henan 3
HAYS3TRT2-3	SRR20950971	SAMN28667285	PRJNA841806	45126612	90253224	90253224	HAYS3TRT2-3	609444	132950	31	571692982	253391203	65.4	903	t2	2021.04.23	Soil	Henan 3
HAYS3TWT3-1	SRR20950932	SAMN28667292	PRJNA841806	43199800	86399600	86399600	HAYS3TWT3-1	588500	175487	38	665487654	385550597	43.73	1204	t3	2021.04.27	Wastewater	Henan 3
HAYS3TWT3-2	SRR20950933	SAMN28667291	PRJNA841806	48378804	96757608	96757608	HAYS3TWT3-2	480663	41885	16	267744162	107142760	44.11	1655	t3	2021.04.27	Wastewater	Henan 3
HAYS3TWT3-3	SRR20950934	SAMN28667290	PRJNA841806	46970996	93941992	93941992	HAYS3TWT3-3	694191	73330	119	444563213	205554896	42.80	1913	t3	2021.04.27	Wastewater	Henan 3
HAYS3TWT3-4	SRR20950967	SAMN28667289	PRJNA841806	42570795	85141590	85141590	HAYS3TWT3-4	137963	48461	60	189347356	128538788	41.8	1711	t3	2021.04.27	Wastewater	Henan 3
LNPCDMT1_05	SRR20950917	SAMN28667305	PRJNA841806	47430688	94861376	94861376	LNPCDMT1-05	1297406	162252	113	895805138	389390967	57.63	1348	t1	2020.09.21	Barn Floor	Liaoning 1
LNPCDMT2_01	SRR20950918	SAMN28667304	PRJNA841806	44168675	88337350	88337350	LNPCDMT2-01	425580	154305	199	613488606	429265494	51.85	1897	t2	2020.10.10	Barn Floor	Liaoning 1
LNPCDMT2_03	SRR20950919	SAMN28667303	PRJNA841806	45943601	91887202	91887202	LNPCDMT2-03	909287	144381	232	773051286	414298446	52.35	1891	t2	2020.10.10	Barn Floor	Liaoning 1
LN1LHJTT3_1	SRR20950928	SAMN28667295	PRJNA841806	46126954	92253908	924975	LN1LHJTT3-1	17770	1634	0	10449542	2768302	52.67	869	t3	2020.10.11	Chicken carcass	Liaoning 1
LN1LHJTT3_16	SRR20950927	SAMN28667296	PRJNA841806	46495559	92991118	2148321	LN1LHJTT3-16	84772	6493	0	47606332	10751914	45.56	821	t3	2020.10.11	Chicken carcass	Liaoning 1
LN1LHJTT3_5	SRR20950929	SAMN28667294	PRJNA841806	45851608	91703216	1037120	LN1LHJTT3-5	21090	1764	0	12026590	2918986	51.48	840	t3	2020.10.11	Chicken carcass	Liaoning 1
LN1LHJTT3_6	SRR20950930	SAMN28667293	PRJNA841806	45625663	91251326	3453811	LN1LHJTT3-6	135289	15302	0	85020095	28446911	46.77	993	t3	2020.10.11	Chicken carcass	Liaoning 1
LNPCJFT1_01	SRR20950859	SAMN28667329	PRJNA841806	49417903	98835806	49304580	LNPCJFT1-01	42867	6819	52	45415993	31692218	42.34	7011	t1	2020.09.21	Chicken faeces	Liaoning 1	Yes	LNPCJFT1_01	R	R	R	R	R	R	R	S	S	R	S	R	R	R	R	S	S	S	S	I	S	S	R	I	R	R
LNPCJFT1_02	SRR20950860	SAMN28667328	PRJNA841806	44603603	89207206	44573081	LNPCJFT1-02	22425	4625	63	29917620	21436357	41.20	6011	t1	2020.09.21	Chicken faeces	Liaoning 1
LNPCJFT1_03	SRR20950861	SAMN28667327	PRJNA841806	47270193	94540386	47266078	LNPCJFT1-03	854373	143038	292	733451941	410569855	44.73	2018	t1	2020.09.21	Chicken faeces	Liaoning 1
LNPCJFT1_04	SRR20950862	SAMN28667326	PRJNA841806	47947875	95895750	47929691	LNPCJFT1-04	16941	3790	87	30508756	24224127	40.69	15953	t1	2020.09.21	Chicken faeces	Liaoning 1	Yes	LNPCJFT1_04	R	R	R	R	R	R	R	S	S	R	S	R	R	R	R	S	S	S	S	R	R	S	R	R	R	R
LNPCJFT1_08	SRR20950863	SAMN28667325	PRJNA841806	39797525	79595050	39792275	LNPCJFT1-08	556696	83200	235	468235046	254950962	41.02	2107	t1	2020.09.21	Chicken faeces	Liaoning 1	Yes	LNPCJFT1_08	R	I	R	R	R	R	R	R	S	R	S	R	R	R	R	S	R	S	S	R	R	S	R	R	R	R
LNPCJFT1_10	SRR20950864	SAMN28667324	PRJNA841806	52502352	105004704	52313612	LNPCJFT1-10	131676	22052	91	130432385	80463788	42.37	3395	t1	2020.09.21	Chicken faeces	Liaoning 1
LNPCJFT1_11	SRR20950865	SAMN28667323	PRJNA841806	47565327	95130654	47483766	LNPCJFT1-11	16058	4500	48	30886868	25726010	41.89	9894	t1	2020.09.21	Chicken faeces	Liaoning 1	Yes	LNPCJFT1_11	R	R	R	R	R	R	R	S	I	R	S	R	R	R	R	S	S	I	S	S	R	S	R	R	R	R
LNPCJFT1_12	SRR20950867	SAMN28667322	PRJNA841806	39515006	79030012	39486572	LNPCJFT1-12	24306	6998	57	44392633	36529095	35.29	7741	t1	2020.09.21	Chicken faeces	Liaoning 1	Yes	LNPCJFT1_12	R	R	R	R	R	R	R	I	I	R	S	R	R	R	I	R	S	I	S	R	R	S	R	R	R	R
LNPCJFT1_13	SRR20950868	SAMN28667321	PRJNA841806	50674441	101348882	50615579	LNPCJFT1-13	16662	3966	147	40369668	34940956	34.92	26391	t1	2020.09.21	Chicken faeces	Liaoning 1	Yes	LNPCJFT1_13	R	R	R	R	R	R	R	I	S	R	S	R	R	R	R	R	S	S	S	R	R	S	R	I	R	R
LNPCJFT1_15	SRR20950869	SAMN28667320	PRJNA841806	44072223	88144446	44047182	LNPCJFT1-15	91691	15125	55	86089348	49563388	46.51	2507	t1	2020.09.21	Chicken faeces	Liaoning 1	Yes	LNPCJFT1_15	R	R	R	R	R	R	R	R	R	R	R	R	R	R	R	S	S	S	S	R	R	R	R	R	R	R
LNPCJFT1_17	SRR20950870	SAMN28667319	PRJNA841806	44871921	89743842	44817382	LNPCJFT1-17	86116	17677	85	95968476	63761578	44.74	3470	t1	2020.09.21	Chicken faeces	Liaoning 1	Yes	LNPCJFT1_17	R	R	R	R	R	R	R	S	S	R	S	R	R	R	R	S	S	S	S	R	S	S	R	I	R	R
LNPCJFT1_18	SRR20950903	SAMN28667318	PRJNA841806	45891572	91783144	45869429	LNPCJFT1-18	68594	14337	43	78219005	52522987	44.13	3723	t1	2020.09.21	Chicken faeces	Liaoning 1	Yes	LNPCJFT1_18	R	I	R	R	R	R	R	R	S	R	S	R	R	R	R	S	R	S	R	R	R	S	R	R	R	R
LNPCJFT2_01	SRR20950904	SAMN28667317	PRJNA841806	46045644	92091288	46040198	LNPCJFT2-01	812334	115805	174	628398041	324365433	42.59	1846	t2	2020.10.10	Chicken faeces	Liaoning 1	Yes	LNPCJFT2_01	R	R	R	R	R	R	R	R	R	R	R	R	R	R	R	S	S	I	S	R	R	R	R	R	R	S
LNPCJFT2_02	SRR20950905	SAMN28667316	PRJNA841806	46181040	92362080	46141241	LNPCJFT2-02	605214	111118	460	610100996	373662342	50.56	2673	t2	2020.10.10	Chicken faeces	Liaoning 1	Yes	LNPCJFT2_02	R	I	R	R	R	R	R	I	S	S	S	R	R	R	R	S	S	S	S	R	R	S	R	R	R	R
LNPCJFT2_03	SRR20950906	SAMN28667315	PRJNA841806	47233625	94467250	47178062	LNPCJFT2-03	224277	39609	111	212056926	120758686	48.70	2038	t2	2020.10.10	Chicken faeces	Liaoning 1	Yes	LNPCJFT2_03	R	R	R	R	R	R	R	R	R	R	R	S	R	I	R	S	S	S	R	R	R	R	I	I	R	R
LNPCJFT2_05	SRR20950907	SAMN28667314	PRJNA841806	42732300	85464600	42287669	LNPCJFT2-05	313679	60262	336	342121368	217897824	49.99	3154	t2	2020.10.10	Chicken faeces	Liaoning 1	Yes	LNPCJFT2_05	R	I	R	R	R	R	R	S	S	S	S	R	R	R	R	S	S	S	S	R	R	S	R	R	R	R
LNPCJFT2_07	SRR20950908	SAMN28667313	PRJNA841806	42426913	84853826	40906268	LNPCJFT2-07	432722	81605	306	435704180	264277633	49.31	2449	t2	2020.10.10	Chicken faeces	Liaoning 1	Yes	LNPCJFT2_07	R	R	R	R	R	R	R	S	S	R	S	S	R	I	R	S	S	S	R	R	I	S	I	I	R	R
LNPCJFT2_09	SRR20950910	SAMN28667312	PRJNA841806	42194561	84389122	42174646	LNPCJFT2-09	423259	86881	308	447429988	283900153	50.50	2661	t2	2020.10.10	Chicken faeces	Liaoning 1	Yes	LNPCJFT2_09	R	R	R	R	R	R	R	I	S	R	S	R	R	R	R	S	S	S	S	R	R	S	R	R	R	R
LNPCJFT2_10	SRR20950911	SAMN28667311	PRJNA841806	40563721	81127442	40535371	LNPCJFT2-10	645949	119961	403	631554677	377752577	48.54	2337	t2	2020.10.10	Chicken faeces	Liaoning 1	Yes	LNPCJFT2_10	R	R	R	R	R	R	R	R	R	R	R	R	R	R	R	S	S	I	S	R	R	R	R	R	R	S
LNPCJFT2_11	SRR20950912	SAMN28667310	PRJNA841806	43186621	86373242	43022644	LNPCJFT2-11	286793	115905	465	534468906	417791328	50.05	3409	t2	2020.10.10	Chicken faeces	Liaoning 1	Yes	LNPCJFT2_11	R	R	R	R	R	R	R	R	R	R	R	R	R	R	R	S	S	I	S	R	R	R	R	R	R	R
LNPCJFT2_13	SRR20950913	SAMN28667309	PRJNA841806	45305600	90611200	45265846	LNPCJFT2-13	39580	10175	66	55249724	40710170	39.14	5161	t2	2020.10.10	Chicken faeces	Liaoning 1	Yes	LNPCJFT2_13	R	R	R	R	R	R	R	R	R	R	R	S	R	R	R	S	S	S	S	S	R	R	R	R	R	R
LNPCJFT2_17	SRR20950914	SAMN28667308	PRJNA841806	41557390	83114780	41380414	LNPCJFT2-17	128189	18097	138	118263209	70720462	44.22	3642	t2	2020.10.10	Chicken faeces	Liaoning 1	Yes	LNPCJFT2_17	R	I	R	R	R	R	R	R	S	R	S	R	R	R	R	S	S	S	S	R	R	S	R	R	R	R
LNPCJFT2_18	SRR20950915	SAMN28667307	PRJNA841806	43396485	86792970	43002808	LNPCJFT2-18	236717	36232	150	210671747	113299110	47.63	2028	t2	2020.10.10	Chicken faeces	Liaoning 1	Yes	LNPCJFT2_18	R	R	R	R	R	R	R	S	R	R	S	R	R	R	R	S	S	S	S	I	S	S	R	I	S	R
LNPCJFT2_19	SRR20950916	SAMN28667306	PRJNA841806	43838645	87677290	43522249	LNPCJFT2-19	225895	30185	157	191938793	101497967	47.95	2200	t2	2020.10.10	Chicken faeces	Liaoning 1	Yes	LNPCJFT2_19	R	R	R	R	R	R	R	R	I	R	S	R	R	R	R	S	R	S	S	R	R	S	R	R	R	R
LNPCTRT1_01	SRR20950921	SAMN28667302	PRJNA841806	43361532	86723064	86723064	LNPCTRT1-01	1263761	116821	37	793637542	236853775	62.98	912	t1	2020.09.21	Soil	Liaoning 1
LNPCTRT1_02	SRR20950922	SAMN28667301	PRJNA841806	44782896	89565792	89565792	LNPCTRT1-02	1512211	163852	154	1000403804	335371244	63.89	979	t1	2020.09.21	Soil	Liaoning 1
LNPCTRT1_03	SRR20950923	SAMN28667300	PRJNA841806	42707608	85415216	85415216	LNPCTRT1-03	1621468	211906	64	1150131599	471127240	59.98	1175	t1	2020.09.21	Soil	Liaoning 1
LNPCTRT2_01	SRR20950924	SAMN28667299	PRJNA841806	42741752	85483504	85483504	LNPCTRT2-01	1294293	132159	36	826646380	260609594	63.07	946	t2	2020.10.10	Soil	Liaoning 1
LNPCTRT2_02	SRR20950925	SAMN28667298	PRJNA841806	42134386	84268772	84268772	LNPCTRT2-02	902094	36231	5	458951017	58799068	62.49	707	t2	2020.10.10	Soil	Liaoning 1
LNPCTRT2_03	SRR20950926	SAMN28667297	PRJNA841806	42534237	85068474	85068474	LNPCTRT2-03	747032	201292	54	775513095	409665160	62.12	1060	t2	2020.10.10	Soil	Liaoning 1
LNTPDMT1_01	SRR20950854	SAMN28667333	PRJNA841806	42277852	84555704	84555704	LNTPDMT1-01	1352430	134847	121	859564461	329944318	50.53	1251	t1	2020.11.12	Barn Floor	Liaoning 2
LNTPDMT1_02	SRR20950856	SAMN28667332	PRJNA841806	44633690	89267380	89267380	LNTPDMT1-02	849457	137207	159	710960250	374347648	57.20	1788	t1	2020.11.12	Barn Floor	Liaoning 2
LNTPDMT1_03	SRR20950857	SAMN28667331	PRJNA841806	42370007	84740014	84740014	LNTPDMT1-03	832758	129068	144	664471435	357198213	58.64	1958	t1	2020.11.12	Barn Floor	Liaoning 2
LNTPDMT2_03	SRR20950858	SAMN28667330	PRJNA841806	44149261	88298522	88298522	LNTPDMT2-03	633014	96477	141	507162208	248904073	47.35	1505	t2	2020.11.29	Barn Floor	Liaoning 2
LNTPJFT1_02	SRR20950764	SAMN28667349	PRJNA841806	42419642	84839284	42344515	LNTPJFT1-02	352245	67866	194	340845924	198462816	48.78	1970	t1	2020.11.12	Chicken faeces	Liaoning 2	Yes	LNTPJFT1_02	R	R	R	R	R	R	R	S	I	R	I	R	R	R	I	R	S	R	S	R	R	S	R	R	R	R
LNTPJFT1_04	SRR20950765	SAMN28667348	PRJNA841806	48260476	96520952	48236259	LNTPJFT1-04	86737	16254	97	92252113	57231323	44.15	2672	t1	2020.11.12	Chicken faeces	Liaoning 2	Yes	LNTPJFT1_04	R	R	R	R	S	R	R	R	S	R	S	R	R	R	R	S	R	I	S	R	R	S	R	R	R	R
LNTPJFT1_06	SRR20950839	SAMN28667347	PRJNA841806	49440917	98881834	49135452	LNTPJFT1-06	230848	36662	333	244367200	150512800	47.03	3697	t1	2020.11.12	Chicken faeces	Liaoning 2	Yes	LNTPJFT1_06	R	R	R	R	R	R	R	S	S	R	S	R	R	R	I	R	S	S	S	I	R	S	R	I	S	R
LNTPJFT1_09	SRR20950840	SAMN28667346	PRJNA841806	43763678	87527356	43623890	LNTPJFT1-09	75715	12489	55	73611741	43276252	42.70	2650	t1	2020.11.12	Chicken faeces	Liaoning 2	Yes	LNTPJFT1_09	R	R	R	R	R	R	S	S	S	S	S	R	R	R	R	S	S	R	S	S	S	S	R	R	R	R
LNTPJFT1_12	SRR20950841	SAMN28667345	PRJNA841806	39031988	78063976	38929731	LNTPJFT1-12	204818	35007	190	208597387	125736680	46.24	2904	t1	2020.11.12	Chicken faeces	Liaoning 2	Yes	LNTPJFT1_12	R	R	R	R	R	R	R	S	S	R	S	R	R	R	R	S	S	I	S	I	I	S	R	R	R	R
LNTPJFT1_14	SRR20950842	SAMN28667344	PRJNA841806	45633877	91267754	45613034	LNTPJFT1-14	259523	48447	205	255481916	150845783	47.89	2182	t1	2020.11.12	Chicken faeces	Liaoning 2	Yes	LNTPJFT1_14	R	R	R	R	S	R	R	R	S	S	S	R	R	R	I	R	R	S	S	R	R	S	R	R	R	R
LNTPJFT1_16	SRR20950843	SAMN28667343	PRJNA841806	41574043	83148086	41483954	LNTPJFT1-16	651832	131810	452	685122297	428747171	48.57	2593	t1	2020.11.12	Chicken faeces	Liaoning 2	Yes	LNTPJFT1_16	R	R	R	R	R	R	R	I	S	R	S	R	R	R	I	R	S	S	R	R	R	S	R	R	R	R
LNTPJFT1_19	SRR20950845	SAMN28667342	PRJNA841806	42461634	84923268	42437620	LNTPJFT1-19	600392	114847	471	589872917	347714967	48.07	2054	t1	2020.11.12	Chicken faeces	Liaoning 2	Yes	LNTPJFT1_19	R	R	R	R	R	R	R	S	S	R	S	R	R	R	I	R	S	S	S	R	I	S	R	R	R	R
LNTPJFT2_01	SRR20950846	SAMN28667341	PRJNA841806	43028636	86057272	42946777	LNTPJFT2-01	501260	89862	335	467692658	264055569	45.55	1885	t2	2020.11.29	Chicken faeces	Liaoning 2	Yes	LNTPJFT2_01	R	R	R	R	S	R	R	I	S	R	S	R	R	R	R	R	S	S	R	R	R	S	R	R	S	R
LNTPJFT2_05	SRR20950847	SAMN28667340	PRJNA841806	39634969	79269938	39614687	LNTPJFT2-05	613868	115859	521	616441403	369476851	48.15	2305	t2	2020.11.29	Chicken faeces	Liaoning 2	Yes	LNTPJFT2_05	R	R	R	R	S	R	R	R	S	R	S	R	R	R	R	S	R	S	S	R	R	S	R	R	R	R
LNTPJFT2_07	SRR20950848	SAMN28667339	PRJNA841806	42818865	85637730	42719157	LNTPJFT2-07	463941	76094	392	434680012	243947035	46.79	2088	t2	2020.11.29	Chicken faeces	Liaoning 2	Yes	LNTPJFT2_07	R	R	R	R	R	R	R	R	I	R	S	R	R	R	R	S	R	S	S	R	R	S	R	R	S	R
LNTPJFT2_09	SRR20950849	SAMN28667338	PRJNA841806	42446510	84893020	42439392	LNTPJFT2-09	622386	120259	528	660349466	410494291	47.49	2689	t2	2020.11.29	Chicken faeces	Liaoning 2	Yes	LNTPJFT2_09	R	I	R	R	R	R	R	S	S	R	S	R	S	R	I	S	S	S	S	R	I	S	R	I	R	R
LNTPJFT2_11	SRR20950850	SAMN28667337	PRJNA841806	42798108	85596216	42668197	LNTPJFT2-11	276319	42489	352	266736336	152397805	45.26	2460	t2	2020.11.29	Chicken faeces	Liaoning 2	Yes	LNTPJFT2_11	R	R	R	R	R	R	R	R	R	S	S	R	R	R	R	S	S	R	S	R	R	S	R	R	R	R
LNTPJFT2_13	SRR20950851	SAMN28667336	PRJNA841806	41700051	83400102	41331408	LNTPJFT2-13	369449	59204	244	331266268	178168487	46.29	1785	t2	2020.11.29	Chicken faeces	Liaoning 2	Yes	LNTPJFT2_13	R	R	R	R	R	R	R	R	I	S	S	R	R	R	R	S	R	R	S	R	R	S	R	R	R	R
LNTPJFT2_15	SRR20950852	SAMN28667335	PRJNA841806	41337974	82675948	41297585	LNTPJFT2-15	146909	26420	85	137677619	79526709	43.61	2147	t2	2020.11.29	Chicken faeces	Liaoning 2	Yes	LNTPJFT2_15	R	R	R	R	R	R	R	R	I	R	S	R	R	R	R	S	R	R	S	R	R	S	R	R	R	R
LNTPJFT2_17	SRR20950853	SAMN28667334	PRJNA841806	50463002	100926004	50412822	LNTPJFT2-17	615288	116313	470	630643432	387290890	47.90	2588	t2	2020.11.29	Chicken faeces	Liaoning 2	Yes	LNTPJFT2_17	R	R	R	R	R	R	R	R	I	S	S	R	R	R	R	S	S	R	S	R	R	S	R	R	R	R
LNTPTRT1_01	SRR20950757	SAMN28667355	PRJNA841806	39225892	78451784	78451784	LNTPTRT1-01	1368801	135578	94	868371923	273108808	60.12	947	t1	2020.11.12	Soil	Liaoning 2
LNTPTRT1_02	SRR20950758	SAMN28667354	PRJNA841806	47071984	94143968	94143968	LNTPTRT1-02	1084676	64597	53	609171909	124183776	66.16	782	t1	2020.11.12	Soil	Liaoning 2
LNTPTRT1_03	SRR20950759	SAMN28667353	PRJNA841806	54112600	108225200	108225200	LNTPTRT1-03	1346996	126099	119	839837590	243735940	63.31	894	t1	2020.11.12	Soil	Liaoning 2
LNTPTRT2_01	SRR20950761	SAMN28667352	PRJNA841806	42201676	84403352	84403352	LNTPTRT2-01	1222877	74549	0	665969842	113893531	65.26	750	t2	2020.11.29	Soil	Liaoning 2
LNTPTRT2_02	SRR20950762	SAMN28667351	PRJNA841806	42882416	85764832	85764832	LNTPTRT2-02	588068	93863	93	496346342	171015861	62.77	790	t2	2020.11.29	Soil	Liaoning 2
LNTPTRT2_03	SRR20950763	SAMN28667350	PRJNA841806	43229714	86459428	86459428	LNTPTRT2-03	1377600	118563	106	843045989	220427155	65.39	844	t2	2020.11.29	Soil	Liaoning 2
LNLDDMT1-01	SRR20950751	SAMN28667361	PRJNA841806	41322185	82644370	82644370	LNLDDMT1-01	293439	41847	129	246262065	142642740	52.31	2974	t1	2021.02.26	Barn Floor	Liaoning 3
LNLDDMT1-02	SRR20950752	SAMN28667360	PRJNA841806	44336382	88672764	88672764	LNLDDMT1-02	259521	43715	261	263530935	168690075	48.84	3910	t1	2021.02.26	Barn Floor	Liaoning 3
LNLDDMT1-03	SRR20950753	SAMN28667359	PRJNA841806	41417330	82834660	82834660	LNLDDMT1-03	178980	34162	33	157933416	95692589	50.45	2283	t1	2021.02.26	Barn Floor	Liaoning 3
LNLDDMT2-01	SRR20950754	SAMN28667358	PRJNA841806	43511494	87022988	87022988	LNLDDMT2-01	371330	46421	80	250984007	119795967	46.49	1675	t2	2021.03.19	Barn Floor	Liaoning 3
LNLDDMT2-02	SRR20950755	SAMN28667357	PRJNA841806	43885616	87771232	87771232	LNLDDMT2-02	632901	100779	242	533100066	301756679	50.27	2212	t2	2021.03.19	Barn Floor	Liaoning 3
LNLDDMT2-03	SRR20950756	SAMN28667356	PRJNA841806	43002033	86004066	86004066	LNLDDMT2-03	357949	40681	80	235867710	106961673	46.02	1602	t2	2021.03.19	Barn Floor	Liaoning 3
LNLHJTT3-10	SRR20950743	SAMN28667367	PRJNA841806	41964473	83928946	1715538	LNLHJTT3-10	54912	9001	2	39572202	16889047	51.10	1158	t3	2021.03.21	Chicken carcass	Liaoning 3
LNLHJTT3-13	SRR20950744	SAMN28667366	PRJNA841806	41816219	83632438	3621247	LNLHJTT3-13	158546	15964	0	95472207	28507455	46.17	933	t3	2021.03.21	Chicken carcass	Liaoning 3
LNLHJTT3-2	SRR20950745	SAMN28667365	PRJNA841806	41759136	83518272	2041997	LNLHJTT3-2	73672	9124	0	48284092	17957653	44.76	1087	t3	2021.03.21	Chicken carcass	Liaoning 3
LNLHJTT3-4	SRR20950746	SAMN28667364	PRJNA841806	43371279	86742558	9283183	LNLHJTT3-4	374800	27147	0	192901021	57218542	45.02	1079	t3	2021.03.21	Chicken carcass	Liaoning 3
LNLHJTT3-6	SRR20950747	SAMN28667363	PRJNA841806	41671212	83342424	1628880	LNLHJTT3-6	47688	3234	0	26014249	5238305	51.86	789	t3	2021.03.21	Chicken carcass	Liaoning 3
LNLHJTT3-8	SRR20950750	SAMN28667362	PRJNA841806	41866427	83732854	959456	LNLHJTT3-8	24100	2301	0	14145919	3806169	55.16	878	t3	2021.03.21	Chicken carcass	Liaoning 3
LNLDJFT1-02	SRR20950828	SAMN28667385	PRJNA841806	39425791	78851582	39359269	LNLDJFT1-02	211031	32141	190	193233445	107316586	44.58	2150	t1	2021.02.26	Chicken faeces	Liaoning 3		LNLDJFT1-02
LNLDJFT1-03	SRR20950829	SAMN28667384	PRJNA841806	49170762	98341524	49147320	LNLDJFT1-03	410482	77883	379	438707145	286003667	42.18	3522	t1	2021.02.26	Chicken faeces	Liaoning 3	Yes	LNLDJFT1-03	R	R	R	R	R	R	R	S	S	R	S	R	R	R	R	S	S	S	R	R	I	S	R	R	R	R
LNLDJFT1-05	SRR20950830	SAMN28667383	PRJNA841806	48984993	97969986	48729415	LNLDJFT1-05	179850	40900	110	203115312	135664607	43.52	2870	t1	2021.02.26	Chicken faeces	Liaoning 3	Yes	LNLDJFT1-05	S	R	R	R	R	R	R	S	S	S	S	R	R	R	R	R	S	S	S	S	S	S	R	R	R	R
LNLDJFT1-07	SRR20950832	SAMN28667382	PRJNA841806	41233213	82466426	41222399	LNLDJFT1-07	281132	103789	454	469991832	349068114	42.77	#N/A	t1	2021.02.26	Chicken faeces	Liaoning 3	Yes	LNLDJFT1-07	R	R	R	R	R	R	R	R	S	R	S	R	R	R	I	S	R	R	S	R	R	S	R	R	R	R
LNLDJFT1-10	SRR20950833	SAMN28667381	PRJNA841806	42587513	85175026	42495537	LNLDJFT1-10	108281	27620	113	141307639	102780425	37.88	3977	t1	2021.02.26	Chicken faeces	Liaoning 3		LNLDJFT1-10
LNLDJFT1-13	SRR20950834	SAMN28667380	PRJNA841806	38642779	77285558	38610395	LNLDJFT1-13	324158	46367	53	260110449	124492922	45.73	1522	t1	2021.02.26	Chicken faeces	Liaoning 3		LNLDJFT1-13
LNLDJFT1-14	SRR20950835	SAMN28667379	PRJNA841806	40351548	80703096	40316628	LNLDJFT1-14	311443	73889	475	420232246	302815771	46.11	4810	t1	2021.02.26	Chicken faeces	Liaoning 3	Yes	LNLDJFT1-14	R	R	R	R	R	R	R	S	S	R	S	R	R	R	R	S	S	I	R	R	R	S	R	R	R	R
LNLDJFT1-15	SRR20950836	SAMN28667378	PRJNA841806	53316158	106632316	53213025	LNLDJFT1-15	140743	23578	243	157199924	100603962	40.85	4686	t1	2021.02.26	Chicken faeces	Liaoning 3	Yes	LNLDJFT1-15	R	R	R	R	R	R	R	R	S	R	S	R	R	R	R	S	R	I	R	R	R	S	R	R	R	R
LNLDJFT1-17	SRR20950837	SAMN28667377	PRJNA841806	44095935	88191870	44024726	LNLDJFT1-17	284632	54616	179	295234932	182186055	41.77	2734	t1	2021.02.26	Chicken faeces	Liaoning 3	Yes	LNLDJFT1-17	R	I	R	S	R	S	S	S	S	S	S	R	R	R	R	S	S	S	S	S	S	S	R	R	R	R
LNLDJFT1-20	SRR20950838	SAMN28667376	PRJNA841806	42386615	84773230	42232739	LNLDJFT1-20	135232	30685	210	163355830	110318307	40.87	3133	t1	2021.02.26	Chicken faeces	Liaoning 3	Yes	LNLDJFT1-20	R	I	R	R	R	R	R	S	S	R	S	R	R	R	I	R	S	S	S	R	S	S	R	R	R	R
LNLDJFT2-02	SRR20950734	SAMN28667375	PRJNA841806	42707359	85414718	42703981	LNLDJFT2-02	561729	82682	167	440641370	220114401	41.18	1617	t2	2021.03.19	Chicken faeces	Liaoning 3	Yes	LNLDJFT2-02	R	R	R	R	R	R	R	S	S	R	S	R	R	R	R	S	S	S	S	S	I	S	R	I	R	R
LNLDJFT2-06	SRR20950735	SAMN28667374	PRJNA841806	42774371	85548742	42766250	LNLDJFT2-06	593641	101643	209	528339065	294486888	42.38	1979	t2	2021.03.19	Chicken faeces	Liaoning 3		LNLDJFT2-06
LNLDJFT2-07	SRR20950736	SAMN28667373	PRJNA841806	45490641	90981282	45487229	LNLDJFT2-07	432310	48763	68	276932785	118181987	43.65	1412	t2	2021.03.19	Chicken faeces	Liaoning 3	Yes	LNLDJFT2-07	R	R	R	R	R	R	R	S	S	R	S	R	R	R	R	S	S	S	S	R	I	S	R	I	R	R
LNLDJFT2-11	SRR20950738	SAMN28667372	PRJNA841806	44453971	88907942	44291575	LNLDJFT2-11	293197	50821	261	297454518	183341503	42.60	3086	t2	2021.03.19	Chicken faeces	Liaoning 3	Yes	LNLDJFT2-11	R	R	R	R	R	R	R	R	S	R	S	R	R	R	R	S	R	R	S	R	R	S	R	R	R	R
LNLDJFT2-12	SRR20950739	SAMN28667371	PRJNA841806	42963387	85926774	42960138	LNLDJFT2-12	280164	92092	173	370535974	243260171	40.76	1576	t2	2021.03.19	Chicken faeces	Liaoning 3		LNLDJFT2-12
LNLDJFT2-13	SRR20950740	SAMN28667370	PRJNA841806	43328944	86657888	43323307	LNLDJFT2-13	520493	78023	145	417743051	219350141	40.17	1858	t2	2021.03.19	Chicken faeces	Liaoning 3		LNLDJFT2-13
LNLDJFT2-15	SRR20950741	SAMN28667369	PRJNA841806	41897677	83795354	41896119	LNLDJFT2-15	215079	77844	113	309503779	216488710	37.22	1873	t2	2021.03.19	Chicken faeces	Liaoning 3	Yes	LNLDJFT2-15	R	R	R	R	R	R	R	I	R	R	S	R	R	R	R	S	S	I	R	R	I	S	R	R	R	R
LNLDJFT2-19	SRR20950742	SAMN28667368	PRJNA841806	44107595	88215190	44099345	LNLDJFT2-19	653323	93411	256	527718728	283501181	40.66	2102	t2	2021.03.19	Chicken faeces	Liaoning 3	Yes	LNLDJFT2-19	R	R	R	R	R	R	R	S	S	R	S	R	R	R	R	S	S	S	R	S	I	S	R	R	R	R
LNLHHJT3-1	SRR20950825	SAMN28667388	PRJNA841806	34109932	68219864	68219864	LNLHHJT3-1	93014	13947	19	69738795	31023800	51.13	1281	t3	2021.03.21	Processing Line	Liaoning 3
LNLHHJT3-2	SRR20950826	SAMN28667387	PRJNA841806	42010733	84021466	84021466	LNLHHJT3-2	83696	8050	0	52955477	17103762	52.00	993	t3	2021.03.21	Processing Line	Liaoning 3
LNLHHJT3-3	SRR20950827	SAMN28667386	PRJNA841806	41611399	83222798	83222798	LNLHHJT3-3	65111	8287	0	46538379	19803096	42.40	1318	t3	2021.03.21	Processing Line	Liaoning 3
LNLDTRT1-01	SRR20950821	SAMN28667392	PRJNA841806	53551977	107103954	107103954	LNLDTRT1-01	1143606	56993	0	607772551	86234856	66.00	720	t1	2021.02.26	Soil	Liaoning 3
LNLDTRT1-03	SRR20950822	SAMN28667391	PRJNA841806	59120799	118241598	118241598	LNLDTRT1-03	1425115	108835	11	836298023	198165130	66.58	815	t1	2021.02.26	Soil	Liaoning 3
LNLDTRT2-01	SRR20950823	SAMN28667390	PRJNA841806	48600099	97200198	97200198	LNLDTRT2-01	1351157	121649	44	807708775	220203518	63.34	877	t2	2021.03.19	Soil	Liaoning 3
LNLDTRT2-03	SRR20950824	SAMN28667389	PRJNA841806	44458231	88916462	88916462	LNLDTRT2-03	1075442	64976	4	594289837	108535350	63.26	759	t2	2021.03.19	Soil	Liaoning 3
LNLHTWT3-1	SRR20950817	SAMN28667395	PRJNA841806	42488933	84977866	84977866	LNLHTWT3-1	727451	72476	75	445373205	179259791	51.21	1401	t3	2021.03.21	Wastewater	Liaoning 3
LNLHTWT3-2	SRR20950818	SAMN28667394	PRJNA841806	42053196	84106392	84106392	LNLHTWT3-2	427159	139939	601	1142972470	1023680692	41.93	12152	t3	2021.03.21	Wastewater	Liaoning 3
LNLHTWT3-3	SRR20950819	SAMN28667393	PRJNA841806	36372485	72744970	72744970	LNLHTWT3-3	572816	206482	25	1167256171	1012838146	41.79	6866	t3	2021.03.21	Wastewater	Liaoning 3
PDDTT3S3L0101	SRR13090069	SAMN16825048	PRJNA678871	42508950	85017900	4138802	PDDTT3S3L0101	65031	18301	2	70165264	38940635	52.28	1134	t3	2019.04.14	Chicken carcass	Shandong 1_1
PDDTT3S3L0202	SRR13090068	SAMN16825049	PRJNA678871	41521026	83042052	2416313	PDDTT3S3L0202	33926	8514	0	33451186	16553953	44.71	989	t3	2019.04.14	Chicken carcass	Shandong 1_1
PDDTT3S3L0303	SRR13090018	SAMN16825050	PRJNA678871	45604674	91209348	2578597	PDDTT3S3L0303	32920	8308	0	32735325	16381656	46.63	1001	t3	2019.04.14	Chicken carcass	Shandong 1_1
PDDTT3S3L0304	SRR13090007	SAMN16825051	PRJNA678871	41649364	83298728	2524924	PDDTT3S3L0304	33885	9041	3	35757013	19149637	43.83	1086	t3	2019.04.14	Chicken carcass	Shandong 1_1
PDDTT3S3L0405	SRR13089996	SAMN16825052	PRJNA678871	44773652	89547304	7805678	PDDTT3S3L0405	115179	30762	18	120335395	63842264	46.62	1066	t3	2019.04.14	Chicken carcass	Shandong 1_1
PDDTT3S3L0406	SRR13089985	SAMN16825053	PRJNA678871	44887389	89774778	4651457	PDDTT3S3L0406	76544	19208	2	75061835	36692134	44.52	979	t3	2019.04.14	Chicken carcass	Shandong 1_1
PDDTT3S3L0507	SRR13089974	SAMN16825054	PRJNA678871	45594924	91189848	5611923	PDDTT3S3L0507	69188	19155	0	71503243	38126016	43.57	1075	t3	2019.04.14	Chicken carcass	Shandong 1_1
PDDTT3S3L0508	SRR13089963	SAMN16825055	PRJNA678871	42088064	84176128	2526004	PDDTT3S3L0508	32100	8349	1	31784739	15944277	45.63	1003	t3	2019.04.14	Chicken carcass	Shandong 1_1
PDDTT3S3L0609	SRR13089952	SAMN16825056	PRJNA678871	41996587	83993174	11037099	PDDTT3S3L0609	109998	33629	7	125081298	73887819	42.83	1249	t3	2019.04.14	Chicken carcass	Shandong 1_1
PDDTT3S3L0610	SRR13089941	SAMN16825057	PRJNA678871	45677090	91354180	5693982	PDDTT3S3L0610	79034	19988	2	80417972	41133759	43.89	1025	t3	2019.04.14	Chicken carcass	Shandong 1_1
PDDTT3S4L0111	SRR13090067	SAMN16825058	PRJNA678871	45023912	90047824	1682815	PDDTT3S4L0111	18301	5641	0	19171052	10680117	47.28	1122	t3	2019.04.14	Chicken carcass	Shandong 1_1
PDDTT3S4L0212	SRR13090056	SAMN16825059	PRJNA678871	42343764	84687528	2125386	PDDTT3S4L0212	25935	6848	0	26233376	13493422	46.32	1032	t3	2019.04.14	Chicken carcass	Shandong 1_1
PDDTT3S4L0313	SRR13090045	SAMN16825060	PRJNA678871	45807970	91615940	2706296	PDDTT3S4L0313	33835	9320	0	34620949	18239567	45.43	1056	t3	2019.04.14	Chicken carcass	Shandong 1_1
PDDTT3S4L0414	SRR13090034	SAMN16825061	PRJNA678871	42167120	84334240	2481497	PDDTT3S4L0414	30633	7851	1	30424427	15222580	44.86	1000	t3	2019.04.14	Chicken carcass	Shandong 1_1
PDDTT3S4L0515	SRR13090024	SAMN16825062	PRJNA678871	42338280	84676560	5393703	PDDTT3S4L0515	72829	20801	0	80324331	45468574	41.96	1174	t3	2019.04.14	Chicken carcass	Shandong 1_1
PDDTT3S4L0616	SRR13090023	SAMN16825063	PRJNA678871	41429847	82859694	3382933	PDDTT3S4L0616	48152	11362	3	46948637	22486835	45.27	959	t3	2019.04.14	Chicken carcass	Shandong 1_1
PDDTT3S4L0717	SRR13090022	SAMN16825064	PRJNA678871	41299544	82599088	4952403	PDDTT3S4L0717	69024	17434	1	68850303	34456010	42.69	1000	t3	2019.04.14	Chicken carcass	Shandong 1_1
PDDTT3S4L0718	SRR13090021	SAMN16825065	PRJNA678871	43219584	86439168	3012784	PDDTT3S4L0718	42874	12068	0	45222391	24595931	44.53	1098	t3	2019.04.14	Chicken carcass	Shandong 1_1
PDDTT3S4L0819	SRR13090020	SAMN16825066	PRJNA678871	43679657	87359314	14384169	PDDTT3S4L0819	125309	39116	23	144890032	87146823	40.95	1285	t3	2019.04.14	Chicken carcass	Shandong 1_1
PDDTT3S4L0820	SRR13090019	SAMN16825067	PRJNA678871	41681734	83363468	7991001	PDDTT3S4L0820	99911	31060	11	112899276	66720587	42.15	1238	t3	2019.04.14	Chicken carcass	Shandong 1_1
PDJFT1S3L0101	SRR13090004	SAMN16825080	PRJNA678871	41218360	82436720	36906926	PDJFT1S3L0101	217354	86412	272	375941243	286446178	51.77	2799	t1	2019.03.28	Chicken faeces	Shandong 1_1	Yes	PDJFT1S3L0101	R	I	R	R	R	R	R	I	S	S	S	R	R	R	S	S	S	I	S	R	R	S	R	R	R	R
PDJFT1S3L0202	SRR13090003	SAMN16825081	PRJNA678871	45533940	91067880	38355734	PDJFT1S3L0202	196922	81847	421	390284001	311375891	50.67	3973	t1	2019.03.28	Chicken faeces	Shandong 1_1	Yes	PDJFT1S3L0202	R	I	R	S	R	R	R	S	S	R	S	R	R	R	S	R	S	S	S	R	I	S	R	R	S	S
PDJFT1S3L0303	SRR13090002	SAMN16825082	PRJNA678871	40385427	80770854	36280322	PDJFT1S3L0303	8409	3311	42	17219099	13782372	48.94	4168	t1	2019.03.28	Chicken faeces	Shandong 1_1	Yes	PDJFT1S3L0303	R	R	R	R	R	R	R	S	S	R	S	R	R	R	I	S	S	S	S	R	I	S	R	I	R	R
PDJFT1S3L0304	SRR13090001	SAMN16825083	PRJNA678871	40004587	80009174	35052656	PDJFT1S3L0304	136129	50384	132	209746424	151238600	52.22	2129	t1	2019.03.28	Chicken faeces	Shandong 1_1	Yes	PDJFT1S3L0304	R	R	S	S	S	S	S	R	S	I	S	R	R	R	I	S	S	I	S	R	R	S	R	R	R	R
PDJFT1S3L0405	SRR13090000	SAMN16825084	PRJNA678871	44745587	89491174	32243696	PDJFT1S3L0405	163042	65178	232	303373554	236661473	52.19	3456	t1	2019.03.28	Chicken faeces	Shandong 1_1	Yes	PDJFT1S3L0405	R	R	R	R	R	R	R	R	S	I	S	R	R	R	I	S	S	R	S	R	R	S	R	R	R	R
PDJFT1S3L0406	SRR13089999	SAMN16825085	PRJNA678871	43367436	86734872	33983632	PDJFT1S3L0406	179466	76601	221	332888675	262426351	51.04	3181	t1	2019.03.28	Chicken faeces	Shandong 1_1	Yes	PDJFT1S3L0406	R	R	R	R	R	R	R	S	I	R	S	R	R	R	I	S	S	R	S	I	I	S	R	R	R	R
PDJFT1S3L0507	SRR13089998	SAMN16825086	PRJNA678871	45028497	90056994	40126173	PDJFT1S3L0507	169349	70608	514	346490909	278657157	52.19	4247	t1	2019.03.28	Chicken faeces	Shandong 1_1	Yes	PDJFT1S3L0507	R	R	R	R	R	R	R	I	S	I	S	R	R	R	R	S	S	R	S	R	R	S	R	R	R	R
PDJFT1S3L0508	SRR13089997	SAMN16825087	PRJNA678871	44524940	89049880	40356592	PDJFT1S3L0508	146624	55518	378	266182724	203910748	51.57	3218	t1	2019.03.28	Chicken faeces	Shandong 1_1	Yes	PDJFT1S3L0508	R	I	R	I	R	R	R	R	S	R	I	R	S	R	R	S	S	S	S	R	R	S	R	R	S	S
PDJFT1S3L0609	SRR13089995	SAMN16825088	PRJNA678871	43237840	86475680	38621486	PDJFT1S3L0609	167418	71766	322	329731041	263617596	52.19	3715	t1	2019.03.28	Chicken faeces	Shandong 1_1	Yes	PDJFT1S3L0609	R	I	R	R	R	R	R	R	I	R	S	R	R	R	S	R	R	I	S	R	R	S	R	R	R	R
PDJFT1S3L0610	SRR13089994	SAMN16825089	PRJNA678871	44765350	89530700	39348247	PDJFT1S3L0610	172519	69277	248	297758531	227081867	52.53	2702	t1	2019.03.28	Chicken faeces	Shandong 1_1	Yes	PDJFT1S3L0610	R	R	R	R	R	R	R	S	S	R	S	R	R	S	I	R	S	S	S	R	R	S	R	R	R	R
PDJFT1S4L0212	SRR13089993	SAMN16825090	PRJNA678871	49460914	98921828	43435542	PDJFT1S4L0212	173072	73341	559	368442823	299978906	49.63	4760	t1	2019.03.28	Chicken faeces	Shandong 1_1	Yes	PDJFT1S4L0212	R	R	R	R	R	R	R	R	R	S	S	R	R	R	I	R	R	R	S	S	R	S	R	R	R	R
PDJFT1S4L0313	SRR13089992	SAMN16825091	PRJNA678871	49333982	98667964	43826183	PDJFT1S4L0313	12449	2846	69	21150819	14798952	46.55	4967	t1	2019.03.28	Chicken faeces	Shandong 1_1	Yes	PDJFT1S4L0313	R	R	R	R	R	R	R	R	R	S	S	R	R	S	I	R	R	S	S	R	R	S	R	R	R	R
PDJFT1S4L0414	SRR13089991	SAMN16825092	PRJNA678871	48081974	96163948	45375335	PDJFT1S4L0414	10916	3345	24	16188774	11138271	47.49	2054	t1	2019.03.28	Chicken faeces	Shandong 1_1	Yes	PDJFT1S4L0414	R	R	R	R	R	R	R	R	R	S	S	R	R	R	I	R	R	S	S	R	R	S	R	R	R	R
PDJFT1S4L0515	SRR13089990	SAMN16825093	PRJNA678871	40334910	80669820	39384942	PDJFT1S4L0515	18785	6096	89	35962232	27454797	50.75	4769	t1	2019.03.28	Chicken faeces	Shandong 1_1	Yes	PDJFT1S4L0515	R	R	R	R	R	R	R	R	R	R	R	R	R	R	R	S	R	R	R	R	R	R	R	R	R	R
PDJFT1S4L0616	SRR13089989	SAMN16825094	PRJNA678871	42555457	85110914	37955106	PDJFT1S4L0616	167631	57624	148	234492365	159496664	49.06	1711	t1	2019.03.28	Chicken faeces	Shandong 1_1	Yes	PDJFT1S4L0616	R	R	R	R	R	R	R	S	R	R	S	R	R	R	R	S	S	R	R	R	R	I	R	R	R	R
PDJFT1S4L0819	SRR13089988	SAMN16825095	PRJNA678871	44205597	88411194	41624743	PDJFT1S4L0819	53544	19154	52	74234393	50825560	49.89	1711	t1	2019.03.28	Chicken faeces	Shandong 1_1	Yes	PDJFT1S4L0819	R	I	R	R	R	R	R	S	S	R	S	R	R	R	S	R	S	R	R	R	I	S	S	R	R	R
PDJFT2S3L0101	SRR13089980	SAMN16825102	PRJNA678871	39958812	79917624	37338912	PDJFT2S3L0101	63959	17350	73	77642227	46426795	45.67	1300	t2	2019.04.13	Chicken faeces	Shandong 1_1	Yes	PDJFT2S3L0101	R	R	R	R	R	R	R	I	S	I	S	S	R	S	I	R	S	S	S	R	R	S	S	R	R	R
PDJFT2S3L0202	SRR13089979	SAMN16825103	PRJNA678871	53713557	107427114	50836506	PDJFT2S3L0202	12583	4733	84	31150147	25850716	43.2	12544	t2	2019.04.13	Chicken faeces	Shandong 1_1	Yes	PDJFT2S3L0202	R	R	R	R	R	R	R	I	S	I	S	R	R	R	I	R	S	S	S	R	R	S	R	R	R	R
PDJFT2S3L0303	SRR13089978	SAMN16825104	PRJNA678871	51621104	103242208	48496955	PDJFT2S3L0303	17668	5026	85	31673615	23193372	45.09	4998	t2	2019.04.13	Chicken faeces	Shandong 1_1	Yes	PDJFT2S3L0303	R	I	S	S	S	R	R	S	S	R	S	R	R	R	I	R	S	S	S	R	I	S	R	S	S	S
PDJFT2S3L0304	SRR13089977	SAMN16825105	PRJNA678871	44718068	89436136	40805891	PDJFT2S3L0304	12472	4434	97	33644030	28294862	43.98	13098	t2	2019.04.13	Chicken faeces	Shandong 1_1	Yes	PDJFT2S3L0304	R	I	S	S	S	R	R	S	S	R	S	R	R	R	S	R	S	S	S	R	I	S	R	S	S	S
PDJFT2S3L0405	SRR13089976	SAMN16825106	PRJNA678871	48959902	97919804	45972845	PDJFT2S3L0405	39442	12446	72	68256942	50222105	46.94	3701	t2	2019.04.13	Chicken faeces	Shandong 1_1	Yes	PDJFT2S3L0405	R	I	R	S	R	I	S	S	S	S	S	S	R	S	S	S	S	I	S	S	S	S	I	R	S	R
PDJFT2S3L0406	SRR13089975	SAMN16825107	PRJNA678871	43164719	86329438	39868297	PDJFT2S3L0406	40715	12903	111	70383675	51831692	44.81	3367	t2	2019.04.13	Chicken faeces	Shandong 1_1	Yes	PDJFT2S3L0406	R	R	R	R	R	R	R	S	S	S	S	S	R	I	I	R	S	S	S	R	R	S	R	R	R	R
PDJFT2S3L0507	SRR13089973	SAMN16825108	PRJNA678871	41009320	82018640	38097041	PDJFT2S3L0507	123302	37426	325	202386053	144445780	48.22	2799	t2	2019.04.13	Chicken faeces	Shandong 1_1		PDJFT2S3L0507
PDJFT2S3L0508	SRR13089972	SAMN16825109	PRJNA678871	43122769	86245538	40119790	PDJFT2S3L0508	123152	35221	155	162671926	103428369	47.4	1502	t2	2019.04.13	Chicken faeces	Shandong 1_1	Yes	PDJFT2S3L0508	R	R	R	R	R	R	R	S	S	S	S	S	R	I	R	R	S	S	S	R	R	S	R	R	R	R
PDJFT2S3L0609	SRR13089971	SAMN16825110	PRJNA678871	45051931	90103862	42174163	PDJFT2S3L0609	89594	28109	116	127034310	85568145	48.06	1799	t2	2019.04.13	Chicken faeces	Shandong 1_1	Yes	PDJFT2S3L0609	R	I	R	S	R	R	R	I	S	R	I	R	S	R	I	R	S	S	S	R	R	S	R	I	S	R
PDJFT2S3L0610	SRR13089970	SAMN16825111	PRJNA678871	42156190	84312380	39222760	PDJFT2S3L0610	43453	13281	82	62160344	41916458	46.57	1833	t2	2019.04.13	Chicken faeces	Shandong 1_1	Yes	PDJFT2S3L0610	R	I	R	S	R	R	R	R	S	R	S	R	S	R	I	R	R	S	S	R	R	S	R	I	S	S
PDJFT2S4L0111	SRR13089969	SAMN16825112	PRJNA678871	42619709	85239418	39499040	PDJFT2S4L0111	37601	12047	66	59616788	42565690	45.26	2551	t2	2019.04.13	Chicken faeces	Shandong 1_1	Yes	PDJFT2S4L0111	R	R	R	R	R	R	S	S	S	I	S	R	R	R	I	S	S	I	S	S	S	S	R	R	R	R
PDJFT2S4L0212	SRR13089968	SAMN16825113	PRJNA678871	40012375	80024750	37488437	PDJFT2S4L0212	9234	3562	72	24013717	20179443	41.02	13440	t2	2019.04.13	Chicken faeces	Shandong 1_1	Yes	PDJFT2S4L0212	R	I	R	R	R	R	R	S	S	S	S	R	R	R	S	R	S	S	S	R	I	S	R	R	R	R
PDJFT2S4L0313	SRR13089967	SAMN16825114	PRJNA678871	40075794	80151588	37295690	PDJFT2S4L0313	22024	7949	122	48865706	39451394	43.07	7245	t2	2019.04.13	Chicken faeces	Shandong 1_1		PDJFT2S4L0313
PDJFT2S4L0414	SRR13089966	SAMN16825115	PRJNA678871	43023524	86047048	39852163	PDJFT2S4L0414	31058	9799	44	48409887	34186968	45.29	2461	t2	2019.04.13	Chicken faeces	Shandong 1_1	Yes	PDJFT2S4L0414	R	I	R	S	R	I	S	S	S	S	S	R	R	S	I	S	S	S	S	S	S	S	S	I	R	R
PDJFT2S4L0515	SRR13089965	SAMN16825116	PRJNA678871	45209837	90419674	41127521	PDJFT2S4L0515	9935	4058	79	27127739	23123503	39.91	13565	t2	2019.04.13	Chicken faeces	Shandong 1_1	Yes	PDJFT2S4L0515	R	R	R	R	R	R	R	R	R	S	S	R	R	R	I	R	R	S	S	R	R	S	R	R	R	R
PDJFT2S4L0616	SRR13089964	SAMN16825117	PRJNA678871	46117233	92234466	42490081	PDJFT2S4L0616	27438	11027	108	56228242	45035859	40.99	4364	t2	2019.04.13	Chicken faeces	Shandong 1_1	Yes	PDJFT2S4L0616	R	R	R	R	R	I	S	S	S	R	S	R	R	R	I	S	S	S	S	S	S	S	R	R	R	R
PDJFT2S4L0717	SRR13089962	SAMN16825118	PRJNA678871	45224204	90448408	41579460	PDJFT2S4L0717	390296	158673	443	669890588	511074218	48.6	2695	t2	2019.04.13	Chicken faeces	Shandong 1_1	Yes	PDJFT2S4L0717	R	I	R	S	R	I	S	S	S	S	S	R	R	R	I	S	S	S	S	S	S	S	R	R	S	R
PDJFT2S4L0718	SRR13089961	SAMN16825119	PRJNA678871	45808910	91617820	42642925	PDJFT2S4L0718	398292	161586	465	679605979	517064614	48.29	2640	t2	2019.04.13	Chicken faeces	Shandong 1_1	Yes	PDJFT2S4L0718	R	R	R	R	R	R	R	R	R	S	S	R	R	R	I	R	R	S	S	R	R	S	R	R	R	R
PDJFT2S4L0819	SRR13089960	SAMN16825120	PRJNA678871	47483718	94967436	43512887	PDJFT2S4L0819	27625	11299	35	51029700	39924537	41.4	3336	t2	2019.04.13	Chicken faeces	Shandong 1_1		PDJFT2S4L0819
PDJFT2S4L0820	SRR13089959	SAMN16825121	PRJNA678871	41970997	83941994	38693306	PDJFT2S4L0820	206893	76853	272	324283399	235714921	48.72	2214	t2	2019.04.13	Chicken faeces	Shandong 1_1		PDJFT2S4L0820
PDTRT1S301	SRR13089939	SAMN16825139	PRJNA678871	43050464	86100928	43050464	PDTRT1S301	447761	83232	97	402907174	161424080	61.09	843	t1	2019.03.28	Soil	Shandong 1_1
PDTRT1S302	SRR13089938	SAMN16825140	PRJNA678871	45380414	90760828	45380414	PDTRT1S302	374999	62245	7	316002224	111202419	61.77	785	t1	2019.03.28	Soil	Shandong 1_1
PDTRT1S403	SRR13089937	SAMN16825141	PRJNA678871	43559890	87119780	43559890	PDTRT1S403	413688	89331	66	391110408	173051216	59.26	903	t1	2019.03.28	Soil	Shandong 1_1
PDTRT1S404	SRR13089936	SAMN16825142	PRJNA678871	43135087	86270174	43135087	PDTRT1S404	466786	82367	30	403511042	149561388	61.51	809	t1	2019.03.28	Soil	Shandong 1_1
PDTRT2S301	SRR13089935	SAMN16825143	PRJNA678871	44110220	88220440	44110220	PDTRT2S301	323000	47821	1	258955463	80652437	63.83	746	t2	2019.04.13	Soil	Shandong 1_1
PDTRT2S302	SRR13089934	SAMN16825144	PRJNA678871	42910314	85820628	42910314	PDTRT2S302	385087	65568	79	345246770	137521801	63.11	823	t2	2019.04.13	Soil	Shandong 1_1
PDTRT2S403	SRR13089933	SAMN16825145	PRJNA678871	40174887	80349774	40174887	PDTRT2S403	357254	63539	0	302270140	110454717	61.66	796	t2	2019.04.13	Soil	Shandong 1_1
PDTRT2S404	SRR13089932	SAMN16825146	PRJNA678871	44732866	89465732	44732866	PDTRT2S404	489121	120828	19	490746072	246552778	59.11	1005	t2	2019.04.13	Soil	Shandong 1_1
PDDTL3A1	SRR13090017	SAMN16825068	PRJNA678871	41562790	83125580	906337	PDDTL3A1	8646	1880	0	7631659	3122221	53.11	872	t3	2019.06.24	Chicken carcass	Shandong 1_2
PDDTL3A2	SRR13090016	SAMN16825069	PRJNA678871	40543994	81087988	790525	PDDTL3A2	8169	1860	0	7249256	3058522	53.45	877	t3	2019.06.24	Chicken carcass	Shandong 1_2
PDDTL3A3	SRR13090015	SAMN16825070	PRJNA678871	48155067	96310134	860005	PDDTL3A3	8967	2127	0	8143420	3568614	52.23	903	t3	2019.06.24	Chicken carcass	Shandong 1_2
PDDTL3A4	SRR13090014	SAMN16825071	PRJNA678871	48828373	97656746	1006563	PDDTL3A4	8853	2147	0	8048278	3571376	53.45	905	t3	2019.06.24	Chicken carcass	Shandong 1_2
PDDTL3A5	SRR13090013	SAMN16825072	PRJNA678871	42008805	84017610	873428	PDDTL3A5	7990	1813	0	7089743	2972731	53.7	877	t3	2019.06.24	Chicken carcass	Shandong 1_2
PDDTL3A6	SRR13090012	SAMN16825073	PRJNA678871	36983886	73967772	2525336	PDDTL3A6	48196	13033	0	48398339	24882921	52.84	1028	t3	2019.06.24	Chicken carcass	Shandong 1_2
PDDTL3C1	SRR13090011	SAMN16825074	PRJNA678871	46568580	93137160	896644	PDDTL3C1	10586	2439	0	9438632	3983770	52.33	887	t3	2019.06.24	Chicken carcass	Shandong 1_2
PDDTL3C2	SRR13090010	SAMN16825075	PRJNA678871	45702317	91404634	730158	PDDTL3C2	8059	1982	0	7353929	3268974	52.73	916	t3	2019.06.24	Chicken carcass	Shandong 1_2
PDDTL3C3	SRR13090009	SAMN16825076	PRJNA678871	44058915	88117830	1029834	PDDTL3C3	10766	2358	0	9476794	3903014	52.01	868	t3	2019.06.24	Chicken carcass	Shandong 1_2
PDDTL3C4	SRR13090008	SAMN16825077	PRJNA678871	47579179	95158358	941378	PDDTL3C4	8673	2000	0	7723118	3284415	52.94	886	t3	2019.06.24	Chicken carcass	Shandong 1_2
PDDTL3C5	SRR13090006	SAMN16825078	PRJNA678871	44039963	88079926	800458	PDDTL3C5	8415	2113	0	7695082	3444854	53.79	920	t3	2019.06.24	Chicken carcass	Shandong 1_2
PDDTL3C6	SRR13090005	SAMN16825079	PRJNA678871	47830918	95661836	994571	PDDTL3C6	9745	2256	0	8675310	3679583	53.03	885	t3	2019.06.24	Chicken carcass	Shandong 1_2
PDJFL1A1	SRR13801632	SAMN18063305	PRJNA678871	51650104	103300208	39534670	PDJFL1A1	14290	5230	50	32155919	26103863	43.46	7217	t1	2019.06.03	Chicken faeces	Shandong 1_2	Yes	PDJFL1A1	R	R	R	R	R	R	R	R	I	R	S	R	R	R	R	R	R	I	S	R	R	S	R	R	R	R
PDJFL1A2	SRR13089958	SAMN16825122	PRJNA678871	77120958	154241916	25518281	PDJFL1A2	21360	7091	84	42870849	33360083	47.26	6197	t1	2019.06.03	Chicken faeces	Shandong 1_2	Yes	PDJFL1A2	R	R	R	R	R	R	R	S	S	S	S	R	R	R	I	R	S	S	S	R	I	S	R	I	R	R
PDJFL1A3	SRR13089957	SAMN16825123	PRJNA678871	39838927	79677854	32474410	PDJFL1A3	21326	6293	37	36744318	26823573	45.15	3970	t1	2019.06.03	Chicken faeces	Shandong 1_2	Yes	PDJFL1A3	R	R	R	R	R	R	R	R	S	R	S	R	R	R	R	R	R	I	S	R	R	S	R	R	R	R
PDJFL1A4	SRR13089956	SAMN16825124	PRJNA678871	51060084	102120168	42041906	PDJFL1A4	173006	74956	503	369181314	302131897	49.88	4627	t1	2019.06.03	Chicken faeces	Shandong 1_2	Yes	PDJFL1A4	R	R	R	R	R	R	R	R	S	R	S	R	R	R	I	R	R	S	S	R	R	S	R	R	R	R
PDJFL1A5	SRR13801631	SAMN18063306	PRJNA678871	48004228	96008456	20992868	PDJFL1A5	123278	49541	242	227884838	177098214	49.6	3313	t1	2019.06.03	Chicken faeces	Shandong 1_2	Yes	PDJFL1A5	R	R	R	R	R	R	R	S	S	R	S	R	R	R	I	R	S	S	S	I	I	S	R	R	R	R
PDJFL1A6	SRR13801627	SAMN18063307	PRJNA678871	43518395	87036790	40465424	PDJFL1A6	20264	6574	31	33080300	23950000	45.89	2795	t1	2019.06.03	Chicken faeces	Shandong 1_2	Yes	PDJFL1A6	R	R	R	R	R	R	R	R	S	R	S	R	R	R	I	R	R	I	S	R	R	S	R	R	R	R
PDJFL1C1	SRR13801626	SAMN18063308	PRJNA678871	52411947	104823894	46638287	PDJFL1C1	57665	17912	23	75528384	48652139	45.63	1524	t1	2019.06.03	Chicken faeces	Shandong 1_2		PDJFL1C1
PDJFL1C2	SRR13801625	SAMN18063309	PRJNA678871	51955937	103911874	45508781	PDJFL1C2	114510	39071	119	163256678	112070893	48.42	1766	t1	2019.06.03	Chicken faeces	Shandong 1_2	Yes	PDJFL1C2	R	I	R	S	R	R	R	R	S	R	I	R	R	R	R	R	R	I	S	R	R	S	R	R	S	R
PDJFL1C3	SRR13089955	SAMN16825125	PRJNA678871	46228786	92457572	42728153	PDJFL1C3	271788	110366	490	500998730	390467580	48.04	3264	t1	2019.06.03	Chicken faeces	Shandong 1_2	Yes	PDJFL1C3	R	R	R	R	R	R	R	R	S	R	S	R	R	R	R	R	R	I	S	R	R	S	R	R	R	R
PDJFL1C4	SRR13089954	SAMN16825126	PRJNA678871	94185076	188370152	83850956	PDJFL1C4	30326	7682	37	42436746	27503708	45.99	1890	t1	2019.06.03	Chicken faeces	Shandong 1_2	Yes	PDJFL1C4	R	R	R	R	R	R	R	S	S	S	S	R	R	R	I	R	S	S	S	R	I	S	R	R	R	R
PDJFL1C5	SRR13089953	SAMN16825127	PRJNA678871	78215060	156430120	63768604	PDJFL1C5	24211	6654	73	40774739	29132140	44.87	3684	t1	2019.06.03	Chicken faeces	Shandong 1_2	Yes	PDJFL1C5	R	R	R	R	R	R	R	S	S	I	S	R	R	R	I	R	S	R	S	S	I	S	R	R	S	S
PDJFL1C6	SRR13801624	SAMN18063310	PRJNA678871	42034670	84069340	40223830	PDJFL1C6	26239	7972	42	39132628	26913072	45.81	2079	t1	2019.06.03	Chicken faeces	Shandong 1_2	Yes	PDJFL1C6	R	R	R	R	R	R	R	R	S	R	S	R	R	R	I	R	R	S	S	R	R	S	R	R	R	R
PDJFL2A1	SRR13801623	SAMN18063311	PRJNA678871	42480489	84960978	37875880	PDJFL2A1	246056	89112	228	375030162	268642745	48.05	2141	t2	2019.06.23	Chicken faeces	Shandong 1_2	Yes	PDJFL2A1	R	R	R	R	R	R	R	S	S	R	S	R	R	R	I	R	S	S	S	R	R	S	R	I	R	R
PDJFL2A2	SRR13089945	SAMN16825134	PRJNA678871	42648828	85297656	36916812	PDJFL2A2	293999	109614	513	498837776	373736304	45.79	2720	t2	2019.06.23	Chicken faeces	Shandong 1_2		PDJFL2A2
PDJFL2C1	SRR13801622	SAMN18063312	PRJNA678871	47915033	95830066	47784572	PDJFL2C1	360768	136501	521	600656175	447691422	46.84	2554	t2	2019.06.23	Chicken faeces	Shandong 1_2	Yes	PDJFL2C1	R	R	R	R	R	R	R	I	S	R	S	R	R	R	I	R	S	S	S	R	R	S	R	R	R	R
PDJFL2C2	SRR13089944	SAMN16825135	PRJNA678871	52341994	104683988	49255761	PDJFL2C2	42737	13616	88	68897640	49463382	48.66	2636	t2	2019.06.23	Chicken faeces	Shandong 1_2	Yes	PDJFL2C2	R	R	R	R	R	R	R	S	S	R	S	S	R	S	R	R	S	S	S	R	I	S	I	R	R	R
PDJFL2C3	SRR13801621	SAMN18063313	PRJNA678871	45055637	90111274	44944430	PDJFL2C3	13729	5538	48	26097564	20484985	40.62	3433	t2	2019.06.23	Chicken faeces	Shandong 1_2		PDJFL2C3
PDJFL2C4	SRR13801620	SAMN18063314	PRJNA678871	54701830	109403660	54576038	PDJFL2C4	91405	25848	85	118844054	75067452	49.03	1514	t2	2019.06.23	Chicken faeces	Shandong 1_2		PDJFL2C4
PDJFL2C5	SRR13089943	SAMN16825136	PRJNA678871	82714763	165429526	75163811	PDJFL2C5	218900	72729	209	305639086	206344395	46.41	1699	t2	2019.06.23	Chicken faeces	Shandong 1_2		PDJFL2C5
PDJFL2C6	SRR13801630	SAMN18063315	PRJNA678871	45237920	90475840	45097792	PDJFL2C6	53306	15611	151	84286131	59154929	44.78	2476	t2	2019.06.23	Chicken faeces	Shandong 1_2		PDJFL2C6
PDTRL101	SRR13089931	SAMN16825147	PRJNA678871	57486604	114973208	57486604	PDTRL101	702931	121444	104	600473785	217421989	62.93	804	t1	2019.06.03	Soil	Shandong 1_2
PDTRL102	SRR13090066	SAMN16825148	PRJNA678871	40628818	81257636	40628818	PDTRL102	633542	143441	23	603482601	276939540	64.42	926	t1	2019.06.03	Soil	Shandong 1_2
PDTRL201	SRR13090065	SAMN16825149	PRJNA678871	47547787	95095574	47547787	PDTRL201	570541	104631	114	519307511	212947850	62.95	851	t2	2019.06.23	Soil	Shandong 1_2
PDTRL202	SRR13090064	SAMN16825150	PRJNA678871	52913137	105826274	52913137	PDTRL202	948657	236250	50	938171389	462563983	62.49	986	t2	2019.06.23	Soil	Shandong 1_2
SDPD1JTT3.01	SRR20950816	SAMN28667396	PRJNA841806	44620724	89241448	2140090	SDPD1JTT3.01	56042	5619	0	33952471	9673262	52.34	904	t3	2019.11.10	Chicken carcass	Shandong 2
SDPD1JTT3.02	SRR20950815	SAMN28667397	PRJNA841806	122303438	244606876	10807916	SDPD1JTT3.02	262276	25359	46	165836109	53184318	48.20	987	t3	2019.11.10	Chicken carcass	Shandong 2
SDPD1JTT3.03	SRR20950814	SAMN28667398	PRJNA841806	84660522	169321044	4043280	SDPD1JTT3.03	67498	4196	0	35318763	6852199	53.86	818	t3	2019.11.10	Chicken carcass	Shandong 2
SDPD1JTT3.04	SRR20950813	SAMN28667399	PRJNA841806	82569358	165138716	2448728	SDPD1JTT3.04	30711	2097	0	16405587	3405862	53.00	821	t3	2019.11.10	Chicken carcass	Shandong 2
SDPD1JTT3.05	SRR20950812	SAMN28667400	PRJNA841806	79512340	159024680	3264782	SDPD1JTT3.05	42145	2431	0	21721977	4015994	52.84	798	t3	2019.11.10	Chicken carcass	Shandong 2
SDPD1JTT3.06	SRR20950811	SAMN28667401	PRJNA841806	115373730	230747460	6750316	SDPD1JTT3.06	150843	10558	17	84997169	20383002	49.87	867	t3	2019.11.10	Chicken carcass	Shandong 2
SDPD1JTT3.07	SRR20950810	SAMN28667402	PRJNA841806	83525118	167050236	19794568	SDPD1JTT3.07	239641	23729	115	175819777	73412143	56.27	1377	t3	2019.11.10	Chicken carcass	Shandong 2
SDPD1JTT3.08	SRR20950808	SAMN28667403	PRJNA841806	81585644	163171288	2519230	SDPD1JTT3.08	38878	2267	0	20297368	3731222	52.54	788	t3	2019.11.10	Chicken carcass	Shandong 2
SDPD1JTT3.09	SRR20950807	SAMN28667404	PRJNA841806	82632882	165265764	4579074	SDPD1JTT3.09	77647	4816	11	43595053	10867980	51.22	911	t3	2019.11.10	Chicken carcass	Shandong 2
SDPD1JTT3.10	SRR20950733	SAMN28667405	PRJNA841806	107212750	214425500	5026282	SDPD1JTT3.10	91015	6770	12	53473039	14605537	50.10	927	t3	2019.11.10	Chicken carcass	Shandong 2
SDPD1JTT3.12	SRR20950732	SAMN28667406	PRJNA841806	44090390	88180780	4251211	SDPD1JTT3.12	116438	14043	48	85610139	35915514	54.08	1249	t3	2019.11.10	Chicken carcass	Shandong 2
SDPD1JTT3.13	SRR20950731	SAMN28667407	PRJNA841806	49676034	99352068	5405937	SDPD1JTT3.13	128531	12067	44	84312875	27695791	51.80	972	t3	2019.11.10	Chicken carcass	Shandong 2
SDPD1JTT3.14	SRR20950730	SAMN28667408	PRJNA841806	82223326	164446652	26679296	SDPD1JTT3.14	547426	71217	103	404649043	176112266	51.06	1298	t3	2019.11.10	Chicken carcass	Shandong 2
SDPD1JTT3.15	SRR20950729	SAMN28667409	PRJNA841806	117487776	234975552	43765778	SDPD1JTT3.15	539611	80696	305	475918115	255025984	51.62	1981	t3	2019.11.10	Chicken carcass	Shandong 2
SDPD1JTT3.16	SRR20950728	SAMN28667410	PRJNA841806	44114334	88228668	3643837	SDPD1JTT3.16	99484	9663	13	63091313	20000437	54.13	963	t3	2019.11.10	Chicken carcass	Shandong 2
SDPD1JTT3.17	SRR20950727	SAMN28667411	PRJNA841806	166054192	332108384	9870020	SDPD1JTT3.17	161376	13018	19	100775399	32986481	49.24	1077	t3	2019.11.10	Chicken carcass	Shandong 2
SDPD1JTT3.18	SRR20950726	SAMN28667412	PRJNA841806	46982130	93964260	4075601	SDPD1JTT3.18	111317	12243	15	76412860	29412565	53.51	1185	t3	2019.11.10	Chicken carcass	Shandong 2
SDPD1JTT3.19	SRR20950724	SAMN28667413	PRJNA841806	121348062	242696124	5449900	SDPD1JTT3.19	123292	9020	0	70318329	17864850	49.26	888	t3	2019.11.10	Chicken carcass	Shandong 2
SDPD1JTT3.20	SRR20950723	SAMN28667414	PRJNA841806	42222787	84445574	1625791	SDPD1JTT3.20	29335	2500	0	16753793	4185256	53.69	865	t3	2019.11.10	Chicken carcass	Shandong 2
SDPD1JFT1.01	SRR20950722	SAMN28667415	PRJNA841806	46121300	92242600	37321506	SDPD1JFT1.01	450619	97286	474	523827810	349731240	44.67	3280	t1	2019.10.19	Chicken faeces	Shandong 2	Yes	SDPD1JFT1.01	R	R	R	R	R	R	R	S	S	R	S	R	R	R	I	R	S	R	S	R	R	S	R	R	R	R
SDPD1JFT1.02	SRR20950721	SAMN28667416	PRJNA841806	42016771	84033542	40405120	SDPD1JFT1.02	182907	27133	157	159545464	83270812	46.37	1769	t1	2019.10.19	Chicken faeces	Shandong 2	Yes	SDPD1JFT1.02	R	R	R	R	R	R	R	R	I	R	S	R	R	R	R	R	R	S	S	R	R	S	R	I	R	R
SDPD1JFT1.03	SRR20950720	SAMN28667417	PRJNA841806	47547707	95095414	41805793	SDPD1JFT1.03	325257	56906	168	299941654	167260466	43.06	1932	t1	2019.10.19	Chicken faeces	Shandong 2	Yes	SDPD1JFT1.03	R	S	R	R	R	R	R	S	I	R	S	R	R	R	S	R	S	I	R	R	I	S	R	R	R	R
SDPD1JFT1.04	SRR20950719	SAMN28667418	PRJNA841806	43495754	86991508	43452517	SDPD1JFT1.04	546669	122740	498	623341255	411278131	44.12	2849	t1	2019.10.19	Chicken faeces	Shandong 2	Yes	SDPD1JFT1.04	R	R	R	R	S	R	R	R	R	R	S	R	R	R	I	S	R	S	S	R	R	S	R	I	S	R
SDPD1JFT1.05	SRR20950718	SAMN28667419	PRJNA841806	46718787	93437574	45523014	SDPD1JFT1.05	202900	30918	151	176685592	91829458	45.47	1705	t1	2019.10.19	Chicken faeces	Shandong 2	Yes	SDPD1JFT1.05	R	R	R	R	R	R	R	R	R	R	S	R	R	R	I	R	R	S	R	R	R	S	R	I	R	R
SDPD1JFT1.06	SRR20950717	SAMN28667420	PRJNA841806	46726021	93452042	41389740	SDPD1JFT1.06	432234	88140	269	430717374	258356339	45.45	2052	t1	2019.10.19	Chicken faeces	Shandong 2	Yes	SDPD1JFT1.06	R	R	R	R	R	R	R	R	I	R	S	R	R	R	I	R	R	S	R	R	R	S	R	I	R	R
SDPD1JFT1.07	SRR20950716	SAMN28667421	PRJNA841806	42670951	85341902	41928206	SDPD1JFT1.07	342301	66766	183	326680096	189897022	46.40	1963	t1	2019.10.19	Chicken faeces	Shandong 2		SDPD1JFT1.07
SDPD1JFT1.08	SRR20950715	SAMN28667422	PRJNA841806	49324924	98649848	48073722	SDPD1JFT1.08	606072	127852	333	620975095	388816128	46.84	2362	t1	2019.10.19	Chicken faeces	Shandong 2	Yes	SDPD1JFT1.08	R	R	R	R	S	R	R	R	R	R	S	R	R	R	R	S	R	S	S	R	R	S	R	I	R	R
SDPD1JFT1.09	SRR20950713	SAMN28667423	PRJNA841806	44988800	89977600	43988691	SDPD1JFT1.09	178369	20826	130	153282167	77679836	43.79	2112	t1	2019.10.19	Chicken faeces	Shandong 2	Yes	SDPD1JFT1.09	R	S	R	R	R	I	S	S	S	S	S	R	S	R	S	S	S	S	S	S	S	S	R	I	S	S
SDPD1JFT1.10	SRR20950712	SAMN28667424	PRJNA841806	80581584	161163168	66983624	SDPD1JFT1.10	189264	17714	109	142321101	61835688	45.03	1628	t1	2019.10.19	Chicken faeces	Shandong 2	Yes	SDPD1JFT1.10	R	R	R	R	S	R	R	R	R	R	S	R	R	R	S	R	R	S	S	R	R	S	R	S	R	R
SDPD1JFT1.11	SRR20950711	SAMN28667425	PRJNA841806	42361226	84722452	42107089	SDPD1JFT1.11	686205	144963	485	730400656	464663473	45.36	2553	t1	2019.10.19	Chicken faeces	Shandong 2	Yes	SDPD1JFT1.11	R	R	R	R	S	R	R	S	S	R	S	R	S	R	I	R	S	S	S	R	I	S	R	I	R	R
SDPD1JFT1.12	SRR20950710	SAMN28667426	PRJNA841806	40031328	80062656	39882570	SDPD1JFT1.12	250946	41804	136	222510880	117182981	46.15	1622	t1	2019.10.19	Chicken faeces	Shandong 2	Yes	SDPD1JFT1.12	R	R	R	R	R	R	R	R	S	R	S	R	R	R	S	R	R	S	S	R	R	S	R	I	R	R
SDPD1JFT1.13	SRR20950709	SAMN28667427	PRJNA841806	79425580	158851160	78991124	SDPD1JFT1.13	660152	129249	487	680476568	421456360	47.21	2616	t1	2019.10.19	Chicken faeces	Shandong 2	Yes	SDPD1JFT1.13	R	R	R	R	R	R	R	R	S	R	S	R	R	R	I	R	R	S	R	R	R	S	R	R	R	R
SDPD1JFT1.14	SRR20950708	SAMN28667428	PRJNA841806	82173864	164347728	81980322	SDPD1JFT1.14	614375	118340	386	599095353	356415203	45.20	2188	t1	2019.10.19	Chicken faeces	Shandong 2	Yes	SDPD1JFT1.14	R	R	R	R	R	R	R	I	S	R	S	R	R	R	R	R	S	S	R	R	R	S	R	I	R	R
SDPD1JFT1.15	SRR20950707	SAMN28667429	PRJNA841806	83152310	166304620	82182014	SDPD1JFT1.15	697391	126138	353	671409976	394293586	47.48	2315	t1	2019.10.19	Chicken faeces	Shandong 2	Yes	SDPD1JFT1.15	R	I	R	R	R	R	R	S	S	R	S	R	R	R	S	R	S	S	I	R	R	S	R	I	R	R
SDPD1JFT2.01	SRR20950706	SAMN28667430	PRJNA841806	49428477	98856954	49251779	SDPD1JFT2.01	715335	134775	622	722118062	442059911	49.52	2497	t2	2019.11.09	Chicken faeces	Shandong 2	Yes	SDPD1JFT2.01	R	R	R	R	R	R	R	R	S	R	S	R	R	R	S	R	R	R	S	R	R	S	R	R	R	R
SDPD1JFT2.02	SRR20950705	SAMN28667431	PRJNA841806	85352446	170704892	84877706	SDPD1JFT2.02	897102	162475	593	864442270	508725523	49.34	2262	t2	2019.11.09	Chicken faeces	Shandong 2	Yes	SDPD1JFT2.02	R	I	R	R	R	R	R	S	S	R	S	R	R	R	S	R	S	S	I	R	I	S	R	I	R	R
SDPD1JFT2.05	SRR20950704	SAMN28667432	PRJNA841806	82442094	164884188	82042466	SDPD1JFT2.05	1047248	185705	332	936829162	525085698	49.54	1965	t2	2019.11.09	Chicken faeces	Shandong 2		SDPD1JFT2.05
SDPD1JFT2.08	SRR20950702	SAMN28667433	PRJNA841806	44929067	89858134	41788720	SDPD1JFT2.08	505756	98468	401	525544237	326103072	48.53	2593	t2	2019.11.09	Chicken faeces	Shandong 2	Yes	SDPD1JFT2.08	R	R	R	R	R	R	R	R	S	R	S	R	R	R	I	R	R	S	R	R	R	S	R	I	R	R
SDPD1JFT2.12	SRR20950806	SAMN28667434	PRJNA841806	41280256	82560512	41224556	SDPD1JFT2.12	707395	139950	469	735492113	461349950	49.40	2675	t2	2019.11.09	Chicken faeces	Shandong 2		SDPD1JFT2.12
SDPD1JFT2.13	SRR20950805	SAMN28667435	PRJNA841806	83073114	166146228	82923240	SDPD1JFT2.13	714203	106482	381	628191980	333992711	49.46	1975	t2	2019.11.09	Chicken faeces	Shandong 2	Yes	SDPD1JFT2.13	R	R	R	R	R	R	R	R	S	R	S	R	R	R	S	R	R	R	S	R	R	S	R	R	R	R
SDPD1JFT2.14	SRR20950804	SAMN28667436	PRJNA841806	48212714	96425428	48010371	SDPD1JFT2.14	852745	142434	462	753185101	417109917	50.52	1928	t2	2019.11.09	Chicken faeces	Shandong 2	Yes	SDPD1JFT2.14	R	R	R	R	R	R	R	R	R	S	S	R	R	R	S	R	R	S	S	R	R	S	R	I	R	R
SDPD1YMT1.02	SRR20950803	SAMN28667437	PRJNA841806	83606884	167213768	75341660	SDPD1YMT1.02	865656	178047	133	837035313	495174512	48.40	2090	t1	2019.10.19	Chicken Feather	Shandong 2
SDPD1YMT1.03	SRR20950802	SAMN28667438	PRJNA841806	81513532	163027064	70652908	SDPD1YMT1.03	1034636	195442	154	949367008	535050186	47.45	1967	t1	2019.10.19	Chicken Feather	Shandong 2
SDPD1YMT1.04	SRR20950801	SAMN28667439	PRJNA841806	93055320	186110640	38162148	SDPD1YMT1.04	722003	128121	108	620991137	326372157	49.35	1667	t1	2019.10.19	Chicken Feather	Shandong 2
SDPD1YMT2.02	SRR20950800	SAMN28667440	PRJNA841806	82324932	164649864	81394432	SDPD1YMT2.02	841049	153211	436	804459675	460317208	49.53	2095	t2	2019.11.09	Chicken Feather	Shandong 2
SDPD1YMT2.03	SRR20950799	SAMN28667441	PRJNA841806	83483984	166967968	80115132	SDPD1YMT2.03	1080638	210883	228	1017617829	585165149	51.08	2000	t2	2019.11.09	Chicken Feather	Shandong 2
SDPD1YMT2.04	SRR20950798	SAMN28667442	PRJNA841806	42102299	84204598	41171445	SDPD1YMT2.04	702974	151274	415	750056417	471642601	49.86	2429	t2	2019.11.09	Chicken Feather	Shandong 2
SDPD1YMT2.05	SRR20950796	SAMN28667443	PRJNA841806	44850164	89700328	44221537	SDPD1YMT2.05	765537	166696	433	815230944	511965818	49.53	2380	t2	2019.11.09	Chicken Feather	Shandong 2
SDPD1TRT1.01	SRR20950792	SAMN28667447	PRJNA841806	46435797	92871594	92871594	SDPD1TRT1.01	1363474	214128	301	1104722208	538382704	66.65	1431	t1	2019.10.19	Soil	Shandong 2
SDPD1TRT1.02	SRR20950793	SAMN28667446	PRJNA841806	43834187	87668374	87668374	SDPD1TRT1.02	1269582	91853	3	735701126	164022109	64.22	799	t1	2019.10.19	Soil	Shandong 2
SDPD1TRT2.01	SRR20950794	SAMN28667445	PRJNA841806	45733790	91467580	91467580	SDPD1TRT2.01	1380967	227005	315	1147003389	571251637	66.99	1442	t2	2019.11.09	Soil	Shandong 2
SDPD1TRT2.02	SRR20950795	SAMN28667444	PRJNA841806	47929700	95859400	95859400	SDPD1TRT2.02	1584384	178884	95	1063703456	363028778	64.53	972	t2	2019.11.09	Soil	Shandong 2
SDPD1TWT3.01	SRR20950789	SAMN28667450	PRJNA841806	81123004	162246008	162246008	SDPD1TWT3.01	1268829	369591	46	1464394186	1048729749	43.63	2870	t3	2019.11.10	Wastewater	Shandong 2
SDPD1TWT3.02	SRR20950790	SAMN28667449	PRJNA841806	81320062	162640124	162640124	SDPD1TWT3.02	641981	167657	226	1234356125	1036615925	41.88	9577	t3	2019.11.10	Wastewater	Shandong 2
SDPD1TWT3.03	SRR20950791	SAMN28667448	PRJNA841806	47981114	95962228	95962228	SDPD1TWT3.03	364160	111564	1634	1098522459	999330648	41.90	16656	t3	2019.11.10	Wastewater	Shandong 2
SDPD3HCT2-01	SRR20950787	SAMN28667452	PRJNA841806	42774713	85549426	85549426	SDPD3HCT2-01	979126	171350	232	864338786	468190409	51.75	1764	t2	2020.10.04	Barn Floor	Shandong 3
SDPD3HCT2-02	SRR20950788	SAMN28667451	PRJNA841806	42302891	84605782	84605782	SDPD3HCT2-02	1428520	200802	102	1040796832	462198708	53.03	1295	t2	2020.10.04	Barn Floor	Shandong 3
SDPD3JFT1-01	SRR20950785	SAMN28667453	PRJNA841806	40358761	80717522	40262711	SDPD3JFT1-01	52091	6452	51	48572691	26602799	43.12	3126	t1	2020.09.17	Chicken faeces	Shandong 3		SDPD3JFT1-01
SDPD3JFT1-03	SRR20950784	SAMN28667454	PRJNA841806	42283877	84567754	42070103	SDPD3JFT1-03	208701	45055	250	247989783	165798269	41.73	3419	t1	2020.09.17	Chicken faeces	Shandong 3	Yes	SDPD3JFT1-03	S	S	R	I	R	S	S	S	S	S	S	R	R	R	S	S	S	S	S	R	S	S	R	R	S	S
SDPD3JFT1-04	SRR20950783	SAMN28667455	PRJNA841806	45238578	90477156	45124815	SDPD3JFT1-04	54549	8673	92	55063103	32749263	44.38	2816	t1	2020.09.17	Chicken faeces	Shandong 3	Yes	SDPD3JFT1-04	R	R	R	R	R	R	R	R	I	R	S	R	R	R	R	R	R	I	S	R	R	S	R	R	R	R
SDPD3JFT1-09	SRR20950782	SAMN28667456	PRJNA841806	42336011	84672022	42285113	SDPD3JFT1-09	61011	9251	82	60080785	35353458	40.73	3128	t1	2020.09.17	Chicken faeces	Shandong 3		SDPD3JFT1-09
SDPD3JFT1-13	SRR20950781	SAMN28667457	PRJNA841806	41056664	82113328	40214069	SDPD3JFT1-13	199304	38960	295	230405368	153161985	40.39	3965	t1	2020.09.17	Chicken faeces	Shandong 3	Yes	SDPD3JFT1-13	R	R	R	R	R	R	R	R	R	S	S	R	R	R	I	S	R	S	S	R	R	S	R	I	R	R
SDPD3JFT1-15	SRR20950780	SAMN28667458	PRJNA841806	41445629	82891258	41368837	SDPD3JFT1-15	27558	5008	36	30954339	19888270	41.70	3821	t1	2020.09.17	Chicken faeces	Shandong 3	Yes	SDPD3JFT1-15	R	R	R	R	R	R	R	R	R	S	S	R	R	R	R	S	R	S	S	R	R	S	R	R	R	R
SDPD3JFT1-19	SRR20950779	SAMN28667459	PRJNA841806	45693219	91386438	45287231	SDPD3JFT1-19	173856	32422	269	199194446	129453245	40.31	3923	t1	2020.09.17	Chicken faeces	Shandong 3		SDPD3JFT1-19
SDPD3JFT1-20	SRR20950778	SAMN28667460	PRJNA841806	43633386	87266772	43511814	SDPD3JFT1-20	196449	36028	286	226721972	146984141	45.15	4129	t1	2020.09.17	Chicken faeces	Shandong 3	Yes	SDPD3JFT1-20	R	R	R	R	R	R	R	R	S	R	S	R	R	R	R	R	R	I	S	R	R	S	R	R	R	R
SDPD3JFT2-01	SRR20950777	SAMN28667461	PRJNA841806	40155794	80311588	40047462	SDPD3JFT2-01	30431	8306	110	57003887	46807692	39.20	9889	t2	2020.10.04	Chicken faeces	Shandong 3		SDPD3JFT2-01
SDPD3JFT2-02	SRR20950776	SAMN28667462	PRJNA841806	42059212	84118424	42031382	SDPD3JFT2-02	131613	23536	193	146441653	93668606	45.23	3781	t2	2020.10.04	Chicken faeces	Shandong 3		SDPD3JFT2-02
SDPD3JFT2-03	SRR20950965	SAMN28667463	PRJNA841806	42568013	85136026	42147783	SDPD3JFT2-03	47529	6665	94	54328582	35149471	43.50	8062	t2	2020.10.04	Chicken faeces	Shandong 3		SDPD3JFT2-03
SDPD3JFT2-07	SRR20950964	SAMN28667464	PRJNA841806	43893650	87787300	43856495	SDPD3JFT2-07	180132	35138	123	183274615	110909649	47.12	2285	t2	2020.10.04	Chicken faeces	Shandong 3		SDPD3JFT2-07
SDPD3JFT2-09	SRR20950963	SAMN28667465	PRJNA841806	44181757	88363514	44132815	SDPD3JFT2-09	411968	94074	360	460420671	300034402	44.44	2534	t2	2020.10.04	Chicken faeces	Shandong 3		SDPD3JFT2-09
SDPD3JFT2-10	SRR20950962	SAMN28667466	PRJNA841806	42972917	85945834	42949597	SDPD3JFT2-10	421882	86387	559	518370543	353645825	45.31	4582	t2	2020.10.04	Chicken faeces	Shandong 3		SDPD3JFT2-10
SDPD3JFT2-11	SRR20950961	SAMN28667467	PRJNA841806	44167448	88334896	44095818	SDPD3JFT2-11	251524	46834	224	260471588	158684737	45.69	2594	t2	2020.10.04	Chicken faeces	Shandong 3		SDPD3JFT2-11
SDPD3JFT2-12	SRR20950960	SAMN28667468	PRJNA841806	44245679	88491358	44199807	SDPD3JFT2-12	199076	33729	231	205379736	123034355	45.78	2787	t2	2020.10.04	Chicken faeces	Shandong 3	Yes	SDPD3JFT2-12	R	R	R	R	R	R	R	S	S	S	S	S	S	R	R	R	S	I	S	R	I	S	I	R	R	R
SDPD3TRT1	SRR20950956	SAMN28667472	PRJNA841806	40004326	80008652	80008652	SDPD3TRT1	677797	24903	0	337359447	39733485	61.27	701	t1	2020.09.17	Soil	Shandong 3
SDPD3TRT2-02	SRR20950957	SAMN28667471	PRJNA841806	47577588	95155176	95155176	SDPD3TRT2-02	1258295	110442	4	747793825	196743975	63.62	863	t2	2020.10.04	Soil	Shandong 3
SDPD3TRT2-1	SRR20950958	SAMN28667470	PRJNA841806	43528904	87057808	87057808	SDPD3TRT2-1	888593	50335	3	476667672	75807996	64.53	740	t2	2020.10.04	Soil	Shandong 3
SDPD3TRT2-3	SRR20950959	SAMN28667469	PRJNA841806	47233072	94466144	94466144	SDPD3TRT2-3	1047589	89964	59	637424192	175512830	62.26	879	t2	2020.10.04	Soil	Shandong 3
SDPD3TWT3-01	SRR20950952	SAMN28667475	PRJNA841806	39896561	79793122	79793122	SDPD3TWT3-01	673959	67403	119	449939256	177145109	44.76	1338	t3	2020.10.05	Wastewater	Shandong 3
SDPD3TWT3-02	SRR20950953	SAMN28667474	PRJNA841806	41904872	83809744	83809744	SDPD3TWT3-02	1773687	193202	101	1152230136	390788806	48.34	973	t3	2020.10.05	Wastewater	Shandong 3
SDPD3TWT3-03	SRR20950954	SAMN28667473	PRJNA841806	42732897	85465794	85465794	SDPD3TWT3-03	309862	92850	1751	1083948467	1000613448	41.98	19241	t3	2020.10.05	Wastewater	Shandong 3
SDPD4HCT1-01	SRR20950946	SAMN28667481	PRJNA841806	47754621	95509242	95509242	SDPD4HCT1-01	1109294	158168	187	866346860	428635852	46.39	1640	t1	2020.12.23	Barn Floor	Shandong 4
SDPD4HCT1-02	SRR20950947	SAMN28667480	PRJNA841806	31405512	62811024	62811024	SDPD4HCT1-02	673554	108077	127	555479864	285017194	44.52	1618	t1	2020.12.23	Barn Floor	Shandong 4
SDPD4HCT1-03	SRR20950948	SAMN28667479	PRJNA841806	43882472	87764944	87764944	SDPD4HCT1-03	1240992	163258	156	935439289	447172572	45.95	1616	t1	2020.12.23	Barn Floor	Shandong 4
SDPD4HCT2-01	SRR20950949	SAMN28667478	PRJNA841806	42685070	85370140	85370140	SDPD4HCT2-01	649256	218617	112	802236396	150650268	42.6	1376	t2	2021.01.09	Barn Floor	Shandong 4
SDPD4HCT2-02	SRR20950950	SAMN28667477	PRJNA841806	54089219	108178438	108178438	SDPD4HCT2-02	1688900	233952	131	1256156288	578060142	44.53	1426	t2	2021.01.09	Barn Floor	Shandong 4
SDPD4HCT2-03	SRR20950951	SAMN28667476	PRJNA841806	42176921	84353842	84353842	SDPD4HCT2-03	816443	133157	144	676617920	354018152	45.13	1660	t2	2021.01.09	Barn Floor	Shandong 4
SDPD4JTT3-01	SRR20950945	SAMN28667482	PRJNA841806	37183098	74366196	1049247	SDPD4JTT3-01	22712	2516	0	13978396	4111603	48.09	907	t3	2021.01.11	Chicken carcass	Shandong 4
SDPD4JTT3-05	SRR20950943	SAMN28667483	PRJNA841806	39465267	78930534	1236765	SDPD4JTT3-05	31965	3806	0	19914950	6043108	52.06	914	t3	2021.01.11	Chicken carcass	Shandong 4
SDPD4JTT3-09	SRR20950942	SAMN28667484	PRJNA841806	45974104	91948208	1497003	SDPD4JTT3-09	29122	2177	0	16097130	3518266	50.55	823	t3	2021.01.11	Chicken carcass	Shandong 4
SDPD4JTT3-10	SRR20950941	SAMN28667485	PRJNA841806	42098067	84196134	702178	SDPD4JTT3-10	15004	1727	0	9451352	2951564	50.03	929	t3	2021.01.11	Chicken carcass	Shandong 4
SDPD4JTT3-11	SRR20950940	SAMN28667486	PRJNA841806	41380100	82760200	1849212	SDPD4JTT3-11	65227	5923	0	39174490	13599522	43.70	1114	t3	2021.01.11	Chicken carcass	Shandong 4
SDPD4JTT3-12	SRR20950939	SAMN28667487	PRJNA841806	44038992	88077984	1032703	SDPD4JTT3-12	21804	1823	0	12451449	2995032	51.48	838	t3	2021.01.11	Chicken carcass	Shandong 4
SDPD4JTT3-14	SRR20950938	SAMN28667488	PRJNA841806	41812218	83624436	1036545	SDPD4JTT3-14	24702	1766	0	13729411	2910065	53.04	804	t3	2021.01.11	Chicken carcass	Shandong 4
SDPD4JTT3-15	SRR20950937	SAMN28667489	PRJNA841806	41103494	82206988	859637	SDPD4JTT3-15	18949	1607	0	10895905	2662420	50.84	839	t3	2021.01.11	Chicken carcass	Shandong 4
SDPD4JFT1-01	SRR20950936	SAMN28667490	PRJNA841806	44569592	89139184	44175885	SDPD4JFT1-01	628684	106787	206	569419461	323731329	42.22	2125	t1	2020.12.23	Chicken faeces	Shandong 4	Yes	SDPD4JFT1-01	R	R	R	R	R	R	R	R	R	R	S	R	R	R	R	S	R	I	S	R	R	S	R	R	R	R
SDPD4JFT1-05	SRR20950935	SAMN28667491	PRJNA841806	44124345	88248690	44115920	SDPD4JFT1-05	727660	130263	214	689889492	411061029	39.53	2453	t1	2020.12.23	Chicken faeces	Shandong 4	Yes	SDPD4JFT1-05	R	R	R	R	R	R	R	R	R	R	S	R	R	R	R	S	R	S	R	R	R	I	R	R	R	R
SDPD4JFT1-08	SRR20950701	SAMN28667492	PRJNA841806	47903676	95807352	47545866	SDPD4JFT1-08	529365	102223	320	525671930	316541692	42.80	2271	t1	2020.12.23	Chicken faeces	Shandong 4	Yes	SDPD4JFT1-08	R	R	R	R	R	R	R	S	I	R	S	R	R	R	R	R	S	I	S	R	R	S	R	R	R	R
SDPD4JFT1-13	SRR20950699	SAMN28667493	PRJNA841806	40534222	81068444	40529882	SDPD4JFT1-13	797195	121151	138	648207504	343610747	44.69	1900	t1	2020.12.23	Chicken faeces	Shandong 4	Yes	SDPD4JFT1-13	R	R	R	R	R	R	R	S	S	R	S	R	R	R	I	R	S	S	S	I	S	S	R	R	R	R
SDPD4JFT1-15	SRR20950698	SAMN28667494	PRJNA841806	42629304	85258608	42623254	SDPD4JFT1-15	609616	107271	185	551458470	319420140	44.65	2192	t1	2020.12.23	Chicken faeces	Shandong 4	Yes	SDPD4JFT1-15	R	R	R	R	R	R	R	S	S	R	S	R	R	R	I	R	S	S	S	R	I	S	R	R	R	R
SDPD4JFT1-17	SRR20950697	SAMN28667495	PRJNA841806	43368707	86737414	43355207	SDPD4JFT1-17	939649	159529	173	817816676	441491889	44.19	1826	t1	2020.12.23	Chicken faeces	Shandong 4	Yes	SDPD4JFT1-17	R	R	S	S	R	R	S	S	S	S	I	S	R	R	R	S	S	S	S	S	S	S	I	S	S	R
SDPD4JFT1-18	SRR20950696	SAMN28667496	PRJNA841806	42330959	84661918	42303956	SDPD4JFT1-18	816348	140482	329	747776434	423083716	44.14	2043	t1	2020.12.23	Chicken faeces	Shandong 4	Yes	SDPD4JFT1-18	R	R	R	R	R	R	R	R	R	R	S	R	R	R	R	S	R	S	S	R	R	S	R	I	R	R
SDPD4JFT2-01	SRR20950695	SAMN28667497	PRJNA841806	53242777	106485554	53122248	SDPD4JFT2-01	466689	82175	207	442200173	270350226	41.84	2782	t2	2021.01.09	Chicken faeces	Shandong 4	Yes	SDPD4JFT2-01	R	R	R	R	R	R	R	R	S	S	I	S	S	R	R	R	S	S	S	R	R	I	R	I	S	R
SDPD4JFT2-03	SRR20950694	SAMN28667498	PRJNA841806	45776464	91552928	45761281	SDPD4JFT2-03	675060	115111	160	585130530	327065772	44.49	2000	t2	2021.01.09	Chicken faeces	Shandong 4	Yes	SDPD4JFT2-03	R	R	R	S	S	R	S	S	S	S	I	R	S	I	I	S	S	S	S	S	R	S	I	R	S	S
SDPD4JFT2-05	SRR20950693	SAMN28667499	PRJNA841806	40723734	81447468	40703070	SDPD4JFT2-05	593940	95425	187	500734419	279728342	42.69	2114	t2	2021.01.09	Chicken faeces	Shandong 4	Yes	SDPD4JFT2-05	R	R	R	R	R	R	S	S	S	S	S	S	R	R	I	S	S	S	S	I	S	S	I	R	S	R
SDPD4JFT2-07	SRR20950692	SAMN28667500	PRJNA841806	46012402	92024804	45972605	SDPD4JFT2-07	462346	76508	224	413681875	225757072	46.87	1876	t2	2021.01.09	Chicken faeces	Shandong 4	Yes	SDPD4JFT2-07	R	R	R	R	R	R	R	R	R	R	I	R	R	R	R	S	R	S	S	R	R	S	R	I	R	R
SDPD4JFT2-09	SRR20950691	SAMN28667501	PRJNA841806	49865661	99731322	49845303	SDPD4JFT2-09	717304	136571	501	720008420	443136789	47.27	2536	t2	2021.01.09	Chicken faeces	Shandong 4	Yes	SDPD4JFT2-09	R	R	R	R	S	R	S	S	S	S	I	S	R	R	R	S	S	S	S	R	S	S	R	R	R	R
SDPD4JFT2-11	SRR20950690	SAMN28667502	PRJNA841806	44439127	88878254	44403955	SDPD4JFT2-11	939797	158243	329	809539990	438860781	43.74	1788	t2	2021.01.09	Chicken faeces	Shandong 4	Yes	SDPD4JFT2-11	R	R	R	S	R	R	R	R	S	S	S	R	R	R	I	R	R	S	S	R	R	S	R	R	S	R
SDPD4JFT2-13	SRR20950688	SAMN28667503	PRJNA841806	46271347	92542694	46253697	SDPD4JFT2-13	739407	115491	341	650503553	369991335	39.41	2330	t2	2021.01.09	Chicken faeces	Shandong 4	Yes	SDPD4JFT2-13	R	R	R	I	R	R	R	S	I	S	S	R	R	R	R	S	S	S	S	R	R	S	R	R	S	R
SDPD4JFT2-17	SRR20950687	SAMN28667504	PRJNA841806	55641441	111282882	55552761	SDPD4JFT2-17	793184	127610	191	669356162	356133503	43.94	1782	t2	2021.01.09	Chicken faeces	Shandong 4	Yes	SDPD4JFT2-17	R	R	R	R	S	R	I	S	S	S	I	S	R	R	R	S	S	S	S	R	S	S	R	R	R	R
SDPD4YMT1-01	SRR20950686	SAMN28667505	PRJNA841806	42736311	85472622	39051381	SDPD4YMT1-01	1071336	180562	277	924143687	504474131	47.00	1842	t1	2020.12.23	Chicken Feather	Shandong 4
SDPD4YMT1-02	SRR20950685	SAMN28667506	PRJNA841806	42729795	85459590	35424567	SDPD4YMT1-02	1061253	175224	249	876079864	456813953	47.87	1644	t1	2020.12.23	Chicken Feather	Shandong 4
SDPD4YMT1-03	SRR20950684	SAMN28667507	PRJNA841806	39528121	79056242	30763576	SDPD4YMT1-03	954855	153651	182	767768348	386096781	48.46	1529	t1	2020.12.23	Chicken Feather	Shandong 4
SDPD4YMT1-04	SRR20950683	SAMN28667508	PRJNA841806	48062686	96125372	39568147	SDPD4YMT1-04	1137400	188299	256	951529325	507735430	47.70	1749	t1	2020.12.23	Chicken Feather	Shandong 4
SDPD4YMT1-05	SRR20950682	SAMN28667509	PRJNA841806	45483090	90966180	39555037	SDPD4YMT1-05	1182896	192368	218	963932537	495069506	47.75	1579	t1	2020.12.23	Chicken Feather	Shandong 4
SDPD4YMT2-01	SRR20950681	SAMN28667510	PRJNA841806	39630463	79260926	39085269	SDPD4YMT2-01	1276050	215644	199	1051819634	570069127	48.39	1820	t2	2021.01.09	Chicken Feather	Shandong 4
SDPD4YMT2-02	SRR20950680	SAMN28667511	PRJNA841806	49856411	99712822	49621356	SDPD4YMT2-02	1055334	190705	437	975494193	571089092	48.03	2183	t2	2021.01.09	Chicken Feather	Shandong 4
SDPD4YMT2-03	SRR20950679	SAMN28667512	PRJNA841806	40622426	81244852	40029751	SDPD4YMT2-03	1176150	195226	296	977148550	516128971	48.24	1685	t2	2021.01.09	Chicken Feather	Shandong 4
SDPD4YMT2-04	SRR20950677	SAMN28667513	PRJNA841806	54561266	109122532	53382848	SDPD4YMT2-04	1388113	229201	343	1172794754	634673918	47.66	1827	t2	2021.01.09	Chicken Feather	Shandong 4
SDPD4YMT2-05	SRR20950676	SAMN28667514	PRJNA841806	43244587	86489174	42892498	SDPD4YMT2-05	1009611	190092	590	998472509	612999438	47.57	2555	t2	2021.01.09	Chicken Feather	Shandong 4
SDPD4HJT3-01	SRR20950673	SAMN28667517	PRJNA841806	45357457	90714914	90714914	SDPD4HJT3-01	245431	72497	2929	1054662678	991100108	41.81	25156	t3	2021.01.11	Processing Line	Shandong 4
SDPD4HJT3-02	SRR20950674	SAMN28667516	PRJNA841806	49065300	98130600	98130600	SDPD4HJT3-02	251301	68072	3285	1060168300	992917010	41.83	27394	t3	2021.01.11	Processing Line	Shandong 4
SDPD4HJT3-03	SRR20950675	SAMN28667515	PRJNA841806	42149348	84298696	84298696	SDPD4HJT3-03	114974	84890	1991	1009981121	989846065	41.74	20674	t3	2021.01.11	Processing Line	Shandong 4
SDPD4TRT1-01	SRR20950902	SAMN28667521	PRJNA841806	46402956	92805912	92805912	SDPD4TRT1-01	1358716	133701	36	861337870	286748470	57.94	1023	t1	2020.12.23	Soil	Shandong 4
SDPD4TRT1-03	SRR20950670	SAMN28667520	PRJNA841806	45390371	90780742	90780742	SDPD4TRT1-03	429950	63484	4	348443066	110140315	62.13	754	t1	2020.12.23	Soil	Shandong 4
SDPD4TRT2-01	SRR20950671	SAMN28667519	PRJNA841806	42679369	85358738	85358738	SDPD4TRT2-01	452088	80268	1	380812401	134024619	65.83	800	t2	2021.01.09	Soil	Shandong 4
SDPD4TRT2-03	SRR20950672	SAMN28667518	PRJNA841806	47965937	95931874	95931874	SDPD4TRT2-03	491916	101741	31	452456271	193206385	57.68	877	t2	2021.01.09	Soil	Shandong 4
SDPD4TWT3-02	SRR20950899	SAMN28667523	PRJNA841806	42215389	84430778	84430778	SDPD4TWT3-02	139565	97135	1496	1023751716	995323990	42.12	17577	t3	2021.01.11	Wastewater	Shandong 4
SDPD4TWT3-03	SRR20950901	SAMN28667522	PRJNA841806	50973196	101946392	101946392	SDPD4TWT3-03	396547	84126	3147	1139373236	1015180302	42.33	24303	t3	2021.01.11	Wastewater	Shandong 4
