# Supplementary material for: Machine learning and metagenomics enhance surveillance of antimicrobial resistance in chicken production in China
Source: Research Square preprint supplement (doi:10.21203/rs.3.rs-2458989/v1), 2023-01-13
Supplement: Supplementary file 8 [file caef8762d1227c21e01b8962.xlsx]

## Sheet: Antibiotic Class
Usage	Antibiotic Class ARGs	pvalue	Relation
tetracycline	beta lactam	1.68965e-13	Increase
tetracycline	all	9.29795e-13	Increase
tetracycline	fosfomycin	8.0587e-12	Increase
tetracycline	tetracycline	6.14204e-11	Increase
tetracycline	aminoglycoside	8.84163e-11	Increase
tetracycline	MLSB	6.84682e-10	Increase
tetracycline	fluoroquinolone	1.45325e-09	Increase
tetracycline	trimethoprim	7.67297e-09	Increase
tetracycline	phenicol	1.84581e-07	Increase
tetracycline	MDR	6.30996e-07	Increase
tetracycline	sulfonamide	9.82394e-06	Increase
lincosamide	MLSB	1.03788e-05	Increase
lincosamide	glycopeptide	8.11796e-05	Increase
lincosamide	all	0.000513637	Increase
lincosamide	beta lactam	0.00151854	Increase
lincosamide	rifamycin	0.00208524	Increase
tetracycline	glycopeptide	0.00577114	Increase
lincosamide	aminoglycoside	0.0090985	Increase
lincosamide	phenicol	0.016972	Increase
tetracycline	nucleoside	0.0270057	Increase
lincosamide	fosfomycin	0.0291385	Increase
lincosamide	fluoroquinolone	0.0423707	Increase
lincosamide	tetracycline	0.0756938	-
MLSB	MDR	0.168708	-
lincosamide	mupirocin	0.207321	-
MLSB	glycopeptide	0.207321	-
lincosamide	sulfonamide	0.336953	-
beta lactams	fluoroquinolone	0.605375	-
lincosamide	MDR	0.626024	-
lincosamide	trimethoprim	0.733809	-
beta lactams	glycopeptide	0.824373	-
beta lactams	tetracycline	0.890034	-
beta lactams	all	1	-
beta lactams	MDR	1	-
beta lactams	MLSB	1	-
beta lactams	aminoglycoside	1	-
beta lactams	beta lactam	1	-
beta lactams	fosfomycin	1	-
beta lactams	mupirocin	1	-
beta lactams	nucleoside	1	-
beta lactams	peptide	1	-
beta lactams	phenicol	1	-
beta lactams	rifamycin	1	-
beta lactams	sulfonamide	1	-
beta lactams	trimethoprim	1	-
lincosamide	nucleoside	1	-
lincosamide	peptide	1	-
MLSB	all	1	-
MLSB	MLSB	1	-
MLSB	aminoglycoside	1	-
MLSB	beta lactam	1	-
MLSB	fluoroquinolone	1	-
MLSB	fosfomycin	1	-
MLSB	mupirocin	1	-
MLSB	nucleoside	1	-
MLSB	peptide	1	-
MLSB	phenicol	1	-
MLSB	rifamycin	1	-
MLSB	sulfonamide	1	-
MLSB	tetracycline	1	-
MLSB	trimethoprim	1	-
tetracycline	mupirocin	1	-
tetracycline	peptide	1	-
tetracycline	rifamycin	1	-

## Sheet: ARGs
Usage	ARG	Antibiotic Class ARGs	pvalue	Relation
lincosamide	ErmX	MLSB	4.93643e-09	Increase
tetracycline	msrE	MLSB	9.10919e-09	Increase
tetracycline	mphE	MLSB	2.23065e-07	Increase
tetracycline	aadA16	aminoglycoside	3.95714e-06	Increase
tetracycline	DHA-1	beta lactam	5.8995e-06	Increase
tetracycline	tet(39)	tetracycline	1.94663e-05	Increase
tetracycline	tetX	tetracycline	3.46548e-05	Increase
tetracycline	ANT(2'')-Ia	aminoglycoside	3.46548e-05	Increase
tetracycline	OXA-1	beta lactam	4.32197e-05	Increase
tetracycline	dfrA27	trimethoprim	4.66428e-05	Increase
tetracycline	determinant_of_bleomycin_resistance	glycopeptide	5.03279e-05	Increase
tetracycline	spd	aminoglycoside	9.96337e-05	Increase
tetracycline	cfrA	MLSB	0.000161659	Increase
lincosamide	apmA	aminoglycoside	0.000264718	Increase
tetracycline	arr-3	rifamycin	0.000264885	Increase
tetracycline	APH(3')-VI	aminoglycoside	0.000360052	Increase
tetracycline	MexD	MDR	0.00227989	Increase
tetracycline	ramA	beta lactam	0.00556171	Increase
tetracycline	tet(B)	tetracycline	0.00617392	Increase
tetracycline	dfrA16	trimethoprim	0.00899041	Increase
tetracycline	lnuD	MLSB	0.0109483	Increase
tetracycline	OXA-58	beta lactam	0.0114682	Increase
tetracycline	tet(Y)	tetracycline	0.016152	Increase
tetracycline	AAC(6')-IIa	aminoglycoside	0.0167748	Increase
tetracycline	Erm(42)	MLSB	0.0200063	Increase
tetracycline	FosC2	fosfomycin	0.0204542	Increase
tetracycline	FosB3	fosfomycin	0.0207523	Increase
tetracycline	tet(G)	tetracycline	0.021216	Increase
tetracycline	CARB-3	beta lactam	0.0258337	Increase
tetracycline	oqxA	MDR	0.028261	Increase
tetracycline	tetS	tetracycline	0.0295421	Increase
tetracycline	AAC(6')-Il	aminoglycoside	0.0295421	Increase
tetracycline	catB2	phenicol	0.0358283	Increase
tetracycline	lnuF	MLSB	0.0409165	Increase
tetracycline	QnrD1	fluoroquinolone	0.0424213	Increase
tetracycline	aadA14	aminoglycoside	0.0513112	-
tetracycline	oqxB	MDR	0.0559599	-
tetracycline	NDM-1	beta lactam	0.056321	-
tetracycline	OXA-347	beta lactam	0.0636601	-
tetracycline	mefC	MLSB	0.0878266	-
tetracycline	ANT(9)-Ia	aminoglycoside	0.0942038	-
tetracycline	mphG	MLSB	0.109148	-
tetracycline	emtA	MLSB	0.110597	-
tetracycline	mphF	MLSB	0.119351	-
tetracycline	catI	phenicol	0.132387	-
tetracycline	Tet(X4)	tetracycline	0.135057	-
beta lactams	CTX-M-65	beta lactam	0.141074	-
tetracycline	OXA-21	beta lactam	0.147519	-
tetracycline	tet36	tetracycline	0.166819	-
tetracycline	dfrA15	trimethoprim	0.166819	-
tetracycline	VEB-1	beta lactam	0.224552	-
tetracycline	tet(H)	tetracycline	0.253156	-
lincosamide	QnrVC6	fluoroquinolone	0.28591	-
tetracycline	dfrD	trimethoprim	0.300412	-
tetracycline	apmA	aminoglycoside	0.335737	-
lincosamide	mphG	MLSB	0.360586	-
lincosamide	Erm(42)	MLSB	0.393937	-
tetracycline	tet(33)	tetracycline	0.412604	-
tetracycline	tet(D)	tetracycline	0.412604	-
tetracycline	tet(C)	tetracycline	0.425441	-
lincosamide	ErmC	MLSB	0.426514	-
lincosamide	AAC(6')-IIa	aminoglycoside	0.431206	-
lincosamide	Bifidobacterium_adolescentis_rpoB_conferring_resistance_to_rifampicin	rifamycin	0.462375	-
tetracycline	Erm(47)	MLSB	0.50113	-
lincosamide	tet(G)	tetracycline	0.540459	-
tetracycline	AAC(6')-Iad	aminoglycoside	0.543507	-
tetracycline	tet(31)	tetracycline	0.543507	-
tetracycline	lsaB	MLSB	0.543507	-
lincosamide	tet36	tetracycline	0.56418	-
lincosamide	mphE	MLSB	0.586992	-
tetracycline	dfrA1	trimethoprim	0.6027	-
beta lactams	ErmA	MLSB	0.624661	-
tetracycline	tet(59)	tetracycline	0.657079	-
tetracycline	Erm(35)	MLSB	0.657079	-
tetracycline	vgaE	MLSB	0.657079	-
tetracycline	aadA5	aminoglycoside	0.672002	-
tetracycline	SAT-1	nucleoside	0.684143	-
tetracycline	ErmY	MLSB	0.793679	-
beta lactams	CcrA_beta-lactamase	beta lactam	0.833012	-
tetracycline	ErmC	MLSB	0.863803	-
lincosamide	FosC2	fosfomycin	0.891082	-
lincosamide	mefC	MLSB	0.891082	-
lincosamide	tet(39)	tetracycline	0.891082	-
lincosamide	mphF	MLSB	0.908879	-
tetracycline	rmtB	aminoglycoside	0.966206	-
beta lactams	APH(4)-Ia	aminoglycoside	1	-
beta lactams	sul1	sulfonamide	1	-
beta lactams	Escherichia_coli_mdfA	MDR	1	-
beta lactams	mdtG	fosfomycin	1	-
beta lactams	acrB	MDR	1	-
beta lactams	mdtC	MDR	1	-
beta lactams	catA8	phenicol	1	-
beta lactams	linG	MLSB	1	-
beta lactams	sul3	sulfonamide	1	-
beta lactams	optrA	MLSB	1	-
beta lactams	CTX-M-55	beta lactam	1	-
beta lactams	ErmC	MLSB	1	-
beta lactams	dfrF	trimethoprim	1	-
beta lactams	AAC(6')-Im	aminoglycoside	1	-
beta lactams	catP	phenicol	1	-
beta lactams	APH(2'')-If	aminoglycoside	1	-
beta lactams	APH(2'')-Ig	aminoglycoside	1	-
beta lactams	dfrA17	trimethoprim	1	-
beta lactams	aadA5	aminoglycoside	1	-
beta lactams	dfrA1	trimethoprim	1	-
beta lactams	OXA-347	beta lactam	1	-
beta lactams	Mef(En2)	MLSB	1	-
beta lactams	apmA	aminoglycoside	1	-
beta lactams	oqxB	MDR	1	-
beta lactams	oqxA	MDR	1	-
beta lactams	lnuD	MLSB	1	-
beta lactams	arr-2	rifamycin	1	-
beta lactams	CfxA3	beta lactam	1	-
beta lactams	cmx	phenicol	1	-
beta lactams	OXA-1	beta lactam	1	-
beta lactams	APH(2'')-IVa	aminoglycoside	1	-
beta lactams	lnuG	MLSB	1	-
beta lactams	SAT-1	nucleoside	1	-
beta lactams	ErmX	MLSB	1	-
beta lactams	AAC(6')-Ib-cr	aminoglycoside	1	-
beta lactams	mphE	MLSB	1	-
beta lactams	ramA	beta lactam	1	-
beta lactams	cmlA1	phenicol	1	-
beta lactams	emtA	MLSB	1	-
beta lactams	arr-3	rifamycin	1	-
beta lactams	dfrA27	trimethoprim	1	-
beta lactams	msrE	MLSB	1	-
beta lactams	FosB3	fosfomycin	1	-
beta lactams	rmtB	aminoglycoside	1	-
beta lactams	Erm(42)	MLSB	1	-
beta lactams	tetX	tetracycline	1	-
beta lactams	tet(B)	tetracycline	1	-
beta lactams	ANT(2'')-Ia	aminoglycoside	1	-
beta lactams	spd	aminoglycoside	1	-
beta lactams	catI	phenicol	1	-
beta lactams	aadA16	aminoglycoside	1	-
beta lactams	cmlA5	phenicol	1	-
beta lactams	tetB(P)	tetracycline	1	-
beta lactams	APH(3')-VIIa	aminoglycoside	1	-
beta lactams	tetA(P)	tetracycline	1	-
beta lactams	tet(Z)	tetracycline	1	-
beta lactams	ANT(9)-Ia	aminoglycoside	1	-
beta lactams	cfrA	MLSB	1	-
beta lactams	AAC(6')-IIa	aminoglycoside	1	-
beta lactams	determinant_of_bleomycin_resistance	glycopeptide	1	-
beta lactams	LnuP	MLSB	1	-
beta lactams	QnrD1	fluoroquinolone	1	-
beta lactams	EreD	MLSB	1	-
beta lactams	tet(G)	tetracycline	1	-
beta lactams	tet(C)	tetracycline	1	-
beta lactams	DHA-1	beta lactam	1	-
beta lactams	APH(2'')-IIIa	aminoglycoside	1	-
beta lactams	CfxA2	beta lactam	1	-
beta lactams	APH(3')-VIa	aminoglycoside	1	-
beta lactams	CTX-M-14	beta lactam	1	-
beta lactams	Klebsiella_pneumoniae_KpnH	MDR	1	-
beta lactams	tet(W/N/W)	tetracycline	1	-
beta lactams	aadA14	aminoglycoside	1	-
beta lactams	APH(3')-VI	aminoglycoside	1	-
beta lactams	dfrE	trimethoprim	1	-
beta lactams	FosC2	fosfomycin	1	-
beta lactams	tet(H)	tetracycline	1	-
beta lactams	tetS	tetracycline	1	-
beta lactams	AAC(6')-Iih	aminoglycoside	1	-
beta lactams	ErmQ	MLSB	1	-
beta lactams	QnrS2	fluoroquinolone	1	-
beta lactams	catQ	phenicol	1	-
beta lactams	cmlA6	phenicol	1	-
beta lactams	emeA	MDR	1	-
beta lactams	LAP-2	fluoroquinolone	1	-
beta lactams	tet(33)	tetracycline	1	-
beta lactams	Tet(X4)	tetracycline	1	-
beta lactams	AAC(3)-IIe	aminoglycoside	1	-
beta lactams	AAC(6')-Il	aminoglycoside	1	-
beta lactams	cepA_beta-lactamase	beta lactam	1	-
beta lactams	dfrA16	trimethoprim	1	-
beta lactams	efrB	MDR	1	-
beta lactams	OXA-58	beta lactam	1	-
beta lactams	tet36	tetracycline	1	-
beta lactams	CARB-3	beta lactam	1	-
beta lactams	efrA	MDR	1	-
beta lactams	mefC	MLSB	1	-
beta lactams	MexD	MDR	1	-
beta lactams	mphG	MLSB	1	-
beta lactams	catB8	phenicol	1	-
beta lactams	lnuF	MLSB	1	-
beta lactams	tet(D)	tetracycline	1	-
beta lactams	catII_from_Escherichia_coli_K-12	phenicol	1	-
beta lactams	dfrA15	trimethoprim	1	-
beta lactams	Erm(47)	MLSB	1	-
beta lactams	FosA6	fosfomycin	1	-
beta lactams	lsaA	MLSB	1	-
beta lactams	NDM-1	beta lactam	1	-
beta lactams	AAC(6')-Ii	aminoglycoside	1	-
beta lactams	CblA-1	beta lactam	1	-
beta lactams	cfrC	MLSB	1	-
beta lactams	FosB1	fosfomycin	1	-
beta lactams	FosK	fosfomycin	1	-
beta lactams	Klebsiella_pneumoniae_KpnG	MDR	1	-
beta lactams	QnrB4	fluoroquinolone	1	-
beta lactams	tet(59)	tetracycline	1	-
beta lactams	tet(Y)	tetracycline	1	-
beta lactams	VEB-1	beta lactam	1	-
beta lactams	catB11	phenicol	1	-
beta lactams	Klebsiella_pneumoniae_KpnF	MDR	1	-
beta lactams	tet(39)	tetracycline	1	-
beta lactams	CfxA6	beta lactam	1	-
beta lactams	tetT	tetracycline	1	-
beta lactams	tetU	tetracycline	1	-
beta lactams	QnrVC6	fluoroquinolone	1	-
beta lactams	aphA15	aminoglycoside	1	-
beta lactams	Erm(35)	MLSB	1	-
beta lactams	Klebsiella_pneumoniae_acrA	MDR	1	-
beta lactams	Klebsiella_pneumoniae_KpnE	MDR	1	-
beta lactams	QnrA1	fluoroquinolone	1	-
beta lactams	ErmY	MLSB	1	-
beta lactams	MOX-3	beta lactam	1	-
beta lactams	mphF	MLSB	1	-
beta lactams	AAC(6')-Iad	aminoglycoside	1	-
beta lactams	CARB-16	beta lactam	1	-
beta lactams	dfrK	trimethoprim	1	-
beta lactams	OXA-21	beta lactam	1	-
beta lactams	tet(31)	tetracycline	1	-
beta lactams	Bifidobacterium_adolescentis_rpoB_conferring_resistance_to_rifampicin	rifamycin	1	-
beta lactams	msrC	MLSB	1	-
beta lactams	vgaE	MLSB	1	-
beta lactams	aadA13	aminoglycoside	1	-
beta lactams	efmA	MDR	1	-
beta lactams	QnrB20	fluoroquinolone	1	-
beta lactams	Bifidobacteria_intrinsic_ileS_conferring_resistance_to_mupirocin	mupirocin	1	-
beta lactams	catB2	phenicol	1	-
beta lactams	EreA	MLSB	1	-
beta lactams	Klebsiella_pneumoniae_OmpK37	beta lactam	1	-
beta lactams	lsaB	MLSB	1	-
beta lactams	PER-1	beta lactam	1	-
beta lactams	vatA	MLSB	1	-
beta lactams	dfrD	trimethoprim	1	-
beta lactams	MCR-8	peptide	1	-
beta lactams	sul4	sulfonamide	1	-
beta lactams	VgbA	MLSB	1	-
beta lactams	NDM-5	beta lactam	1	-
beta lactams	QnrVC1	fluoroquinolone	1	-
beta lactams	vanXYC	glycopeptide	1	-
beta lactams	CTX-M-27	beta lactam	1	-
beta lactams	OXA-209	beta lactam	1	-
beta lactams	aadA9	aminoglycoside	1	-
beta lactams	CMY-59	beta lactam	1	-
beta lactams	CTX-M-24	beta lactam	1	-
beta lactams	FosD	fosfomycin	1	-
beta lactams	APH(2'')-Ie	aminoglycoside	1	-
beta lactams	CTX-M-64	beta lactam	1	-
beta lactams	EBR-2	beta lactam	1	-
beta lactams	Tet(X3)	tetracycline	1	-
beta lactams	vanWG	glycopeptide	1	-
beta lactams	AAC(6')-Ib4	aminoglycoside	1	-
beta lactams	aadA24	aminoglycoside	1	-
beta lactams	BLA1	beta lactam	1	-
beta lactams	cmlB1	phenicol	1	-
beta lactams	dfrA20	trimethoprim	1	-
beta lactams	lnuE	MLSB	1	-
beta lactams	MUS-1_beta-lactamase	beta lactam	1	-
beta lactams	QepA2	fluoroquinolone	1	-
beta lactams	vanG	glycopeptide	1	-
beta lactams	vanRC	glycopeptide	1	-
beta lactams	vanSC	glycopeptide	1	-
beta lactams	AAC(6')-Ib9	aminoglycoside	1	-
beta lactams	aadA22	aminoglycoside	1	-
beta lactams	CTX-M-15	beta lactam	1	-
beta lactams	Enterobacter_cloacae_acrA	MDR	1	-
beta lactams	FosA2	fosfomycin	1	-
beta lactams	FosB	fosfomycin	1	-
beta lactams	SHV-187	beta lactam	1	-
beta lactams	vanC	glycopeptide	1	-
beta lactams	vanRG	glycopeptide	1	-
beta lactams	Bla2	beta lactam	1	-
beta lactams	aadA11	aminoglycoside	1	-
beta lactams	aadA7	aminoglycoside	1	-
beta lactams	CARB-4	beta lactam	1	-
beta lactams	CTX-M-123	beta lactam	1	-
beta lactams	dfrA32	trimethoprim	1	-
beta lactams	EreA2	MLSB	1	-
beta lactams	vanTC	glycopeptide	1	-
beta lactams	AAC(6')-Iai	aminoglycoside	1	-
beta lactams	dfrA19	trimethoprim	1	-
beta lactams	SHV-110	beta lactam	1	-
beta lactams	tet(J)	tetracycline	1	-
beta lactams	vanZF	glycopeptide	1	-
beta lactams	AAC(6')-Ia	aminoglycoside	1	-
beta lactams	MCR-3.11	peptide	1	-
beta lactams	MexF	MDR	1	-
beta lactams	mexK	MDR	1	-
beta lactams	mphL	MLSB	1	-
beta lactams	CTX-M-104	beta lactam	1	-
beta lactams	Erm(36)	MLSB	1	-
beta lactams	Erm(49)	MLSB	1	-
beta lactams	QnrB5	fluoroquinolone	1	-
beta lactams	tet(K)	tetracycline	1	-
beta lactams	VEB-5	beta lactam	1	-
beta lactams	vgaC	MLSB	1	-
beta lactams	AAC(6')-IIc	aminoglycoside	1	-
beta lactams	APH(3')-Ib	aminoglycoside	1	-
beta lactams	catA4	phenicol	1	-
beta lactams	CfxA	beta lactam	1	-
beta lactams	dfrA6_from_Proteus_mirabilis	trimethoprim	1	-
beta lactams	PER-4	beta lactam	1	-
beta lactams	AAC(6')-Ib8	aminoglycoside	1	-
beta lactams	AAC(6')-Iid	aminoglycoside	1	-
beta lactams	ACI-1	beta lactam	1	-
beta lactams	cmeB	MDR	1	-
beta lactams	CTX-M-109	beta lactam	1	-
beta lactams	dfrI	trimethoprim	1	-
beta lactams	OXA-85	beta lactam	1	-
beta lactams	VIM-4	beta lactam	1	-
beta lactams	vga(E)_Staphylococcus_cohnii	MLSB	1	-
beta lactams	ACT-25	beta lactam	1	-
beta lactams	catII	phenicol	1	-
beta lactams	CTX-M-148	beta lactam	1	-
beta lactams	dfrA5	trimethoprim	1	-
beta lactams	QnrB2	fluoroquinolone	1	-
beta lactams	QnrB26	fluoroquinolone	1	-
beta lactams	smeE	MDR	1	-
beta lactams	catB10	phenicol	1	-
beta lactams	aadA3	aminoglycoside	1	-
beta lactams	CARB-1	beta lactam	1	-
beta lactams	clcD	MLSB	1	-
beta lactams	dfrB1	trimethoprim	1	-
beta lactams	dfrB4	trimethoprim	1	-
beta lactams	Enterococcus_faecalis_chloramphenicol_acetyltransferase	phenicol	1	-
beta lactams	NDM-14	beta lactam	1	-
beta lactams	sdiA	MDR	1	-
beta lactams	TEM-122	beta lactam	1	-
beta lactams	TEM-150	beta lactam	1	-
beta lactams	vatB	MLSB	1	-
beta lactams	vatD	MLSB	1	-
beta lactams	MUS-2_beta-lactamase	beta lactam	1	-
beta lactams	OXA-465	beta lactam	1	-
beta lactams	AAC(6')-Ib10	aminoglycoside	1	-
beta lactams	AAC(6')-Ic	aminoglycoside	1	-
beta lactams	aadA8	aminoglycoside	1	-
beta lactams	aadA8b	aminoglycoside	1	-
beta lactams	CARB-14	beta lactam	1	-
beta lactams	Clostridium_perfringens_mprF	peptide	1	-
beta lactams	CMH-1	beta lactam	1	-
beta lactams	CTX-M-3	beta lactam	1	-
beta lactams	dfrA6	trimethoprim	1	-
beta lactams	SHV-11	beta lactam	1	-
beta lactams	SRT-1	beta lactam	1	-
beta lactams	tet(41)	tetracycline	1	-
beta lactams	TUS-1_beta-lactamase	beta lactam	1	-
beta lactams	AxyX	MDR	1	-
beta lactams	Erm(43)	MLSB	1	-
beta lactams	OXA-17	beta lactam	1	-
beta lactams	OXA-205	beta lactam	1	-
beta lactams	OprZ	MDR	1	-
beta lactams	PC1_beta-lactamase_(blaZ)	beta lactam	1	-
beta lactams	aadA12	aminoglycoside	1	-
beta lactams	aadA6	aminoglycoside	1	-
beta lactams	mecA	beta lactam	1	-
beta lactams	mecR1	beta lactam	1	-
beta lactams	mphC	MLSB	1	-
beta lactams	vgaALC	MLSB	1	-
beta lactams	AAC(6')-Ib-Hangzhou	aminoglycoside	1	-
beta lactams	APH(6)-Ic	aminoglycoside	1	-
beta lactams	CTX-M-114	beta lactam	1	-
beta lactams	CTX-M-9	beta lactam	1	-
beta lactams	FONA-5	beta lactam	1	-
beta lactams	FosB5	fosfomycin	1	-
beta lactams	IMP-3	beta lactam	1	-
beta lactams	MexE	MDR	1	-
beta lactams	MIR-12	beta lactam	1	-
beta lactams	MOX-6	beta lactam	1	-
beta lactams	mtrA	MDR	1	-
beta lactams	OprJ	MDR	1	-
beta lactams	OXA-246	beta lactam	1	-
beta lactams	OXA-257	beta lactam	1	-
beta lactams	OXA-427	beta lactam	1	-
beta lactams	tet(E)	tetracycline	1	-
beta lactams	ACT-30	beta lactam	1	-
beta lactams	AxyY	MDR	1	-
beta lactams	LAP-1	fluoroquinolone	1	-
beta lactams	NPS-1	beta lactam	1	-
beta lactams	OXA-119	beta lactam	1	-
beta lactams	OXA-45	beta lactam	1	-
beta lactams	VIM-1	beta lactam	1	-
beta lactams	VIM-14	beta lactam	1	-
beta lactams	dfrB3	trimethoprim	1	-
lincosamide	APH(4)-Ia	aminoglycoside	1	-
lincosamide	sul1	sulfonamide	1	-
lincosamide	Escherichia_coli_mdfA	MDR	1	-
lincosamide	mdtG	fosfomycin	1	-
lincosamide	acrB	MDR	1	-
lincosamide	ErmA	MLSB	1	-
lincosamide	mdtC	MDR	1	-
lincosamide	catA8	phenicol	1	-
lincosamide	linG	MLSB	1	-
lincosamide	sul3	sulfonamide	1	-
lincosamide	optrA	MLSB	1	-
lincosamide	CTX-M-55	beta lactam	1	-
lincosamide	dfrF	trimethoprim	1	-
lincosamide	AAC(6')-Im	aminoglycoside	1	-
lincosamide	catP	phenicol	1	-
lincosamide	APH(2'')-If	aminoglycoside	1	-
lincosamide	APH(2'')-Ig	aminoglycoside	1	-
lincosamide	dfrA17	trimethoprim	1	-
lincosamide	aadA5	aminoglycoside	1	-
lincosamide	dfrA1	trimethoprim	1	-
lincosamide	OXA-347	beta lactam	1	-
lincosamide	Mef(En2)	MLSB	1	-
lincosamide	oqxB	MDR	1	-
lincosamide	oqxA	MDR	1	-
lincosamide	lnuD	MLSB	1	-
lincosamide	arr-2	rifamycin	1	-
lincosamide	CfxA3	beta lactam	1	-
lincosamide	cmx	phenicol	1	-
lincosamide	OXA-1	beta lactam	1	-
lincosamide	APH(2'')-IVa	aminoglycoside	1	-
lincosamide	lnuG	MLSB	1	-
lincosamide	SAT-1	nucleoside	1	-
lincosamide	AAC(6')-Ib-cr	aminoglycoside	1	-
lincosamide	ramA	beta lactam	1	-
lincosamide	cmlA1	phenicol	1	-
lincosamide	emtA	MLSB	1	-
lincosamide	arr-3	rifamycin	1	-
lincosamide	dfrA27	trimethoprim	1	-
lincosamide	msrE	MLSB	1	-
lincosamide	FosB3	fosfomycin	1	-
lincosamide	rmtB	aminoglycoside	1	-
lincosamide	tetX	tetracycline	1	-
lincosamide	CTX-M-65	beta lactam	1	-
lincosamide	tet(B)	tetracycline	1	-
lincosamide	ANT(2'')-Ia	aminoglycoside	1	-
lincosamide	spd	aminoglycoside	1	-
lincosamide	catI	phenicol	1	-
lincosamide	CcrA_beta-lactamase	beta lactam	1	-
lincosamide	aadA16	aminoglycoside	1	-
lincosamide	cmlA5	phenicol	1	-
lincosamide	tetB(P)	tetracycline	1	-
lincosamide	APH(3')-VIIa	aminoglycoside	1	-
lincosamide	tetA(P)	tetracycline	1	-
lincosamide	tet(Z)	tetracycline	1	-
lincosamide	ANT(9)-Ia	aminoglycoside	1	-
lincosamide	cfrA	MLSB	1	-
lincosamide	determinant_of_bleomycin_resistance	glycopeptide	1	-
lincosamide	LnuP	MLSB	1	-
lincosamide	QnrD1	fluoroquinolone	1	-
lincosamide	EreD	MLSB	1	-
lincosamide	tet(C)	tetracycline	1	-
lincosamide	DHA-1	beta lactam	1	-
lincosamide	APH(2'')-IIIa	aminoglycoside	1	-
lincosamide	CfxA2	beta lactam	1	-
lincosamide	APH(3')-VIa	aminoglycoside	1	-
lincosamide	CTX-M-14	beta lactam	1	-
lincosamide	Klebsiella_pneumoniae_KpnH	MDR	1	-
lincosamide	tet(W/N/W)	tetracycline	1	-
lincosamide	aadA14	aminoglycoside	1	-
lincosamide	APH(3')-VI	aminoglycoside	1	-
lincosamide	dfrE	trimethoprim	1	-
lincosamide	tet(H)	tetracycline	1	-
lincosamide	tetS	tetracycline	1	-
lincosamide	AAC(6')-Iih	aminoglycoside	1	-
lincosamide	ErmQ	MLSB	1	-
lincosamide	QnrS2	fluoroquinolone	1	-
lincosamide	catQ	phenicol	1	-
lincosamide	cmlA6	phenicol	1	-
lincosamide	emeA	MDR	1	-
lincosamide	LAP-2	fluoroquinolone	1	-
lincosamide	tet(33)	tetracycline	1	-
lincosamide	Tet(X4)	tetracycline	1	-
lincosamide	AAC(3)-IIe	aminoglycoside	1	-
lincosamide	AAC(6')-Il	aminoglycoside	1	-
lincosamide	cepA_beta-lactamase	beta lactam	1	-
lincosamide	dfrA16	trimethoprim	1	-
lincosamide	efrB	MDR	1	-
lincosamide	OXA-58	beta lactam	1	-
lincosamide	CARB-3	beta lactam	1	-
lincosamide	efrA	MDR	1	-
lincosamide	MexD	MDR	1	-
lincosamide	catB8	phenicol	1	-
lincosamide	lnuF	MLSB	1	-
lincosamide	tet(D)	tetracycline	1	-
lincosamide	catII_from_Escherichia_coli_K-12	phenicol	1	-
lincosamide	dfrA15	trimethoprim	1	-
lincosamide	Erm(47)	MLSB	1	-
lincosamide	FosA6	fosfomycin	1	-
lincosamide	lsaA	MLSB	1	-
lincosamide	NDM-1	beta lactam	1	-
lincosamide	AAC(6')-Ii	aminoglycoside	1	-
lincosamide	CblA-1	beta lactam	1	-
lincosamide	cfrC	MLSB	1	-
lincosamide	FosB1	fosfomycin	1	-
lincosamide	FosK	fosfomycin	1	-
lincosamide	Klebsiella_pneumoniae_KpnG	MDR	1	-
lincosamide	QnrB4	fluoroquinolone	1	-
lincosamide	tet(59)	tetracycline	1	-
lincosamide	tet(Y)	tetracycline	1	-
lincosamide	VEB-1	beta lactam	1	-
lincosamide	catB11	phenicol	1	-
lincosamide	Klebsiella_pneumoniae_KpnF	MDR	1	-
lincosamide	CfxA6	beta lactam	1	-
lincosamide	tetT	tetracycline	1	-
lincosamide	tetU	tetracycline	1	-
lincosamide	aphA15	aminoglycoside	1	-
lincosamide	Erm(35)	MLSB	1	-
lincosamide	Klebsiella_pneumoniae_acrA	MDR	1	-
lincosamide	Klebsiella_pneumoniae_KpnE	MDR	1	-
lincosamide	QnrA1	fluoroquinolone	1	-
lincosamide	ErmY	MLSB	1	-
lincosamide	MOX-3	beta lactam	1	-
lincosamide	AAC(6')-Iad	aminoglycoside	1	-
lincosamide	CARB-16	beta lactam	1	-
lincosamide	dfrK	trimethoprim	1	-
lincosamide	OXA-21	beta lactam	1	-
lincosamide	tet(31)	tetracycline	1	-
lincosamide	msrC	MLSB	1	-
lincosamide	vgaE	MLSB	1	-
lincosamide	aadA13	aminoglycoside	1	-
lincosamide	efmA	MDR	1	-
lincosamide	QnrB20	fluoroquinolone	1	-
lincosamide	Bifidobacteria_intrinsic_ileS_conferring_resistance_to_mupirocin	mupirocin	1	-
lincosamide	catB2	phenicol	1	-
lincosamide	EreA	MLSB	1	-
lincosamide	Klebsiella_pneumoniae_OmpK37	beta lactam	1	-
lincosamide	lsaB	MLSB	1	-
lincosamide	PER-1	beta lactam	1	-
lincosamide	vatA	MLSB	1	-
lincosamide	dfrD	trimethoprim	1	-
lincosamide	MCR-8	peptide	1	-
lincosamide	sul4	sulfonamide	1	-
lincosamide	VgbA	MLSB	1	-
lincosamide	NDM-5	beta lactam	1	-
lincosamide	QnrVC1	fluoroquinolone	1	-
lincosamide	vanXYC	glycopeptide	1	-
lincosamide	CTX-M-27	beta lactam	1	-
lincosamide	OXA-209	beta lactam	1	-
lincosamide	aadA9	aminoglycoside	1	-
lincosamide	CMY-59	beta lactam	1	-
lincosamide	CTX-M-24	beta lactam	1	-
lincosamide	FosD	fosfomycin	1	-
lincosamide	APH(2'')-Ie	aminoglycoside	1	-
lincosamide	CTX-M-64	beta lactam	1	-
lincosamide	EBR-2	beta lactam	1	-
lincosamide	Tet(X3)	tetracycline	1	-
lincosamide	vanWG	glycopeptide	1	-
lincosamide	AAC(6')-Ib4	aminoglycoside	1	-
lincosamide	aadA24	aminoglycoside	1	-
lincosamide	BLA1	beta lactam	1	-
lincosamide	cmlB1	phenicol	1	-
lincosamide	dfrA20	trimethoprim	1	-
lincosamide	lnuE	MLSB	1	-
lincosamide	MUS-1_beta-lactamase	beta lactam	1	-
lincosamide	QepA2	fluoroquinolone	1	-
lincosamide	vanG	glycopeptide	1	-
lincosamide	vanRC	glycopeptide	1	-
lincosamide	vanSC	glycopeptide	1	-
lincosamide	AAC(6')-Ib9	aminoglycoside	1	-
lincosamide	aadA22	aminoglycoside	1	-
lincosamide	CTX-M-15	beta lactam	1	-
lincosamide	Enterobacter_cloacae_acrA	MDR	1	-
lincosamide	FosA2	fosfomycin	1	-
lincosamide	FosB	fosfomycin	1	-
lincosamide	SHV-187	beta lactam	1	-
lincosamide	vanC	glycopeptide	1	-
lincosamide	vanRG	glycopeptide	1	-
lincosamide	Bla2	beta lactam	1	-
lincosamide	aadA11	aminoglycoside	1	-
lincosamide	aadA7	aminoglycoside	1	-
lincosamide	CARB-4	beta lactam	1	-
lincosamide	CTX-M-123	beta lactam	1	-
lincosamide	dfrA32	trimethoprim	1	-
lincosamide	EreA2	MLSB	1	-
lincosamide	vanTC	glycopeptide	1	-
lincosamide	AAC(6')-Iai	aminoglycoside	1	-
lincosamide	dfrA19	trimethoprim	1	-
lincosamide	SHV-110	beta lactam	1	-
lincosamide	tet(J)	tetracycline	1	-
lincosamide	vanZF	glycopeptide	1	-
lincosamide	AAC(6')-Ia	aminoglycoside	1	-
lincosamide	MCR-3.11	peptide	1	-
lincosamide	MexF	MDR	1	-
lincosamide	mexK	MDR	1	-
lincosamide	mphL	MLSB	1	-
lincosamide	CTX-M-104	beta lactam	1	-
lincosamide	Erm(36)	MLSB	1	-
lincosamide	Erm(49)	MLSB	1	-
lincosamide	QnrB5	fluoroquinolone	1	-
lincosamide	tet(K)	tetracycline	1	-
lincosamide	VEB-5	beta lactam	1	-
lincosamide	vgaC	MLSB	1	-
lincosamide	AAC(6')-IIc	aminoglycoside	1	-
lincosamide	APH(3')-Ib	aminoglycoside	1	-
lincosamide	catA4	phenicol	1	-
lincosamide	CfxA	beta lactam	1	-
lincosamide	dfrA6_from_Proteus_mirabilis	trimethoprim	1	-
lincosamide	PER-4	beta lactam	1	-
lincosamide	AAC(6')-Ib8	aminoglycoside	1	-
lincosamide	AAC(6')-Iid	aminoglycoside	1	-
lincosamide	ACI-1	beta lactam	1	-
lincosamide	cmeB	MDR	1	-
lincosamide	CTX-M-109	beta lactam	1	-
lincosamide	dfrI	trimethoprim	1	-
lincosamide	OXA-85	beta lactam	1	-
lincosamide	VIM-4	beta lactam	1	-
lincosamide	vga(E)_Staphylococcus_cohnii	MLSB	1	-
lincosamide	ACT-25	beta lactam	1	-
lincosamide	catII	phenicol	1	-
lincosamide	CTX-M-148	beta lactam	1	-
lincosamide	dfrA5	trimethoprim	1	-
lincosamide	QnrB2	fluoroquinolone	1	-
lincosamide	QnrB26	fluoroquinolone	1	-
lincosamide	smeE	MDR	1	-
lincosamide	catB10	phenicol	1	-
lincosamide	aadA3	aminoglycoside	1	-
lincosamide	CARB-1	beta lactam	1	-
lincosamide	clcD	MLSB	1	-
lincosamide	dfrB1	trimethoprim	1	-
lincosamide	dfrB4	trimethoprim	1	-
lincosamide	Enterococcus_faecalis_chloramphenicol_acetyltransferase	phenicol	1	-
lincosamide	NDM-14	beta lactam	1	-
lincosamide	sdiA	MDR	1	-
lincosamide	TEM-122	beta lactam	1	-
lincosamide	TEM-150	beta lactam	1	-
lincosamide	vatB	MLSB	1	-
lincosamide	vatD	MLSB	1	-
lincosamide	MUS-2_beta-lactamase	beta lactam	1	-
lincosamide	OXA-465	beta lactam	1	-
lincosamide	AAC(6')-Ib10	aminoglycoside	1	-
lincosamide	AAC(6')-Ic	aminoglycoside	1	-
lincosamide	aadA8	aminoglycoside	1	-
lincosamide	aadA8b	aminoglycoside	1	-
lincosamide	CARB-14	beta lactam	1	-
lincosamide	Clostridium_perfringens_mprF	peptide	1	-
lincosamide	CMH-1	beta lactam	1	-
lincosamide	CTX-M-3	beta lactam	1	-
lincosamide	dfrA6	trimethoprim	1	-
lincosamide	SHV-11	beta lactam	1	-
lincosamide	SRT-1	beta lactam	1	-
lincosamide	tet(41)	tetracycline	1	-
lincosamide	TUS-1_beta-lactamase	beta lactam	1	-
lincosamide	AxyX	MDR	1	-
lincosamide	Erm(43)	MLSB	1	-
lincosamide	OXA-17	beta lactam	1	-
lincosamide	OXA-205	beta lactam	1	-
lincosamide	OprZ	MDR	1	-
lincosamide	PC1_beta-lactamase_(blaZ)	beta lactam	1	-
lincosamide	aadA12	aminoglycoside	1	-
lincosamide	aadA6	aminoglycoside	1	-
lincosamide	mecA	beta lactam	1	-
lincosamide	mecR1	beta lactam	1	-
lincosamide	mphC	MLSB	1	-
lincosamide	vgaALC	MLSB	1	-
lincosamide	AAC(6')-Ib-Hangzhou	aminoglycoside	1	-
lincosamide	APH(6)-Ic	aminoglycoside	1	-
lincosamide	CTX-M-114	beta lactam	1	-
lincosamide	CTX-M-9	beta lactam	1	-
lincosamide	FONA-5	beta lactam	1	-
lincosamide	FosB5	fosfomycin	1	-
lincosamide	IMP-3	beta lactam	1	-
lincosamide	MexE	MDR	1	-
lincosamide	MIR-12	beta lactam	1	-
lincosamide	MOX-6	beta lactam	1	-
lincosamide	mtrA	MDR	1	-
lincosamide	OprJ	MDR	1	-
lincosamide	OXA-246	beta lactam	1	-
lincosamide	OXA-257	beta lactam	1	-
lincosamide	OXA-427	beta lactam	1	-
lincosamide	tet(E)	tetracycline	1	-
lincosamide	ACT-30	beta lactam	1	-
lincosamide	AxyY	MDR	1	-
lincosamide	LAP-1	fluoroquinolone	1	-
lincosamide	NPS-1	beta lactam	1	-
lincosamide	OXA-119	beta lactam	1	-
lincosamide	OXA-45	beta lactam	1	-
lincosamide	VIM-1	beta lactam	1	-
lincosamide	VIM-14	beta lactam	1	-
lincosamide	dfrB3	trimethoprim	1	-
MLSB	APH(4)-Ia	aminoglycoside	1	-
MLSB	sul1	sulfonamide	1	-
MLSB	Escherichia_coli_mdfA	MDR	1	-
MLSB	mdtG	fosfomycin	1	-
MLSB	acrB	MDR	1	-
MLSB	ErmA	MLSB	1	-
MLSB	mdtC	MDR	1	-
MLSB	catA8	phenicol	1	-
MLSB	linG	MLSB	1	-
MLSB	sul3	sulfonamide	1	-
MLSB	optrA	MLSB	1	-
MLSB	CTX-M-55	beta lactam	1	-
MLSB	ErmC	MLSB	1	-
MLSB	dfrF	trimethoprim	1	-
MLSB	AAC(6')-Im	aminoglycoside	1	-
MLSB	catP	phenicol	1	-
MLSB	APH(2'')-If	aminoglycoside	1	-
MLSB	APH(2'')-Ig	aminoglycoside	1	-
MLSB	dfrA17	trimethoprim	1	-
MLSB	aadA5	aminoglycoside	1	-
MLSB	dfrA1	trimethoprim	1	-
MLSB	OXA-347	beta lactam	1	-
MLSB	Mef(En2)	MLSB	1	-
MLSB	apmA	aminoglycoside	1	-
MLSB	oqxB	MDR	1	-
MLSB	oqxA	MDR	1	-
MLSB	lnuD	MLSB	1	-
MLSB	arr-2	rifamycin	1	-
MLSB	CfxA3	beta lactam	1	-
MLSB	cmx	phenicol	1	-
MLSB	OXA-1	beta lactam	1	-
MLSB	APH(2'')-IVa	aminoglycoside	1	-
MLSB	lnuG	MLSB	1	-
MLSB	SAT-1	nucleoside	1	-
MLSB	ErmX	MLSB	1	-
MLSB	AAC(6')-Ib-cr	aminoglycoside	1	-
MLSB	mphE	MLSB	1	-
MLSB	ramA	beta lactam	1	-
MLSB	cmlA1	phenicol	1	-
MLSB	emtA	MLSB	1	-
MLSB	arr-3	rifamycin	1	-
MLSB	dfrA27	trimethoprim	1	-
MLSB	msrE	MLSB	1	-
MLSB	FosB3	fosfomycin	1	-
MLSB	rmtB	aminoglycoside	1	-
MLSB	Erm(42)	MLSB	1	-
MLSB	tetX	tetracycline	1	-
MLSB	CTX-M-65	beta lactam	1	-
MLSB	tet(B)	tetracycline	1	-
MLSB	ANT(2'')-Ia	aminoglycoside	1	-
MLSB	spd	aminoglycoside	1	-
MLSB	catI	phenicol	1	-
MLSB	CcrA_beta-lactamase	beta lactam	1	-
MLSB	aadA16	aminoglycoside	1	-
MLSB	cmlA5	phenicol	1	-
MLSB	tetB(P)	tetracycline	1	-
MLSB	APH(3')-VIIa	aminoglycoside	1	-
MLSB	tetA(P)	tetracycline	1	-
MLSB	tet(Z)	tetracycline	1	-
MLSB	ANT(9)-Ia	aminoglycoside	1	-
MLSB	cfrA	MLSB	1	-
MLSB	AAC(6')-IIa	aminoglycoside	1	-
MLSB	determinant_of_bleomycin_resistance	glycopeptide	1	-
MLSB	LnuP	MLSB	1	-
MLSB	QnrD1	fluoroquinolone	1	-
MLSB	EreD	MLSB	1	-
MLSB	tet(G)	tetracycline	1	-
MLSB	tet(C)	tetracycline	1	-
MLSB	DHA-1	beta lactam	1	-
MLSB	APH(2'')-IIIa	aminoglycoside	1	-
MLSB	CfxA2	beta lactam	1	-
MLSB	APH(3')-VIa	aminoglycoside	1	-
MLSB	CTX-M-14	beta lactam	1	-
MLSB	Klebsiella_pneumoniae_KpnH	MDR	1	-
MLSB	tet(W/N/W)	tetracycline	1	-
MLSB	aadA14	aminoglycoside	1	-
MLSB	APH(3')-VI	aminoglycoside	1	-
MLSB	dfrE	trimethoprim	1	-
MLSB	FosC2	fosfomycin	1	-
MLSB	tet(H)	tetracycline	1	-
MLSB	tetS	tetracycline	1	-
MLSB	AAC(6')-Iih	aminoglycoside	1	-
MLSB	ErmQ	MLSB	1	-
MLSB	QnrS2	fluoroquinolone	1	-
MLSB	catQ	phenicol	1	-
MLSB	cmlA6	phenicol	1	-
MLSB	emeA	MDR	1	-
MLSB	LAP-2	fluoroquinolone	1	-
MLSB	tet(33)	tetracycline	1	-
MLSB	Tet(X4)	tetracycline	1	-
MLSB	AAC(3)-IIe	aminoglycoside	1	-
MLSB	AAC(6')-Il	aminoglycoside	1	-
MLSB	cepA_beta-lactamase	beta lactam	1	-
MLSB	dfrA16	trimethoprim	1	-
MLSB	efrB	MDR	1	-
MLSB	OXA-58	beta lactam	1	-
MLSB	tet36	tetracycline	1	-
MLSB	CARB-3	beta lactam	1	-
MLSB	efrA	MDR	1	-
MLSB	mefC	MLSB	1	-
MLSB	MexD	MDR	1	-
MLSB	mphG	MLSB	1	-
MLSB	catB8	phenicol	1	-
MLSB	lnuF	MLSB	1	-
MLSB	tet(D)	tetracycline	1	-
MLSB	catII_from_Escherichia_coli_K-12	phenicol	1	-
MLSB	dfrA15	trimethoprim	1	-
MLSB	Erm(47)	MLSB	1	-
MLSB	FosA6	fosfomycin	1	-
MLSB	lsaA	MLSB	1	-
MLSB	NDM-1	beta lactam	1	-
MLSB	AAC(6')-Ii	aminoglycoside	1	-
MLSB	CblA-1	beta lactam	1	-
MLSB	cfrC	MLSB	1	-
MLSB	FosB1	fosfomycin	1	-
MLSB	FosK	fosfomycin	1	-
MLSB	Klebsiella_pneumoniae_KpnG	MDR	1	-
MLSB	QnrB4	fluoroquinolone	1	-
MLSB	tet(59)	tetracycline	1	-
MLSB	tet(Y)	tetracycline	1	-
MLSB	VEB-1	beta lactam	1	-
MLSB	catB11	phenicol	1	-
MLSB	Klebsiella_pneumoniae_KpnF	MDR	1	-
MLSB	tet(39)	tetracycline	1	-
MLSB	CfxA6	beta lactam	1	-
MLSB	tetT	tetracycline	1	-
MLSB	tetU	tetracycline	1	-
MLSB	QnrVC6	fluoroquinolone	1	-
MLSB	aphA15	aminoglycoside	1	-
MLSB	Erm(35)	MLSB	1	-
MLSB	Klebsiella_pneumoniae_acrA	MDR	1	-
MLSB	Klebsiella_pneumoniae_KpnE	MDR	1	-
MLSB	QnrA1	fluoroquinolone	1	-
MLSB	ErmY	MLSB	1	-
MLSB	MOX-3	beta lactam	1	-
MLSB	mphF	MLSB	1	-
MLSB	AAC(6')-Iad	aminoglycoside	1	-
MLSB	CARB-16	beta lactam	1	-
MLSB	dfrK	trimethoprim	1	-
MLSB	OXA-21	beta lactam	1	-
MLSB	tet(31)	tetracycline	1	-
MLSB	Bifidobacterium_adolescentis_rpoB_conferring_resistance_to_rifampicin	rifamycin	1	-
MLSB	msrC	MLSB	1	-
MLSB	vgaE	MLSB	1	-
MLSB	aadA13	aminoglycoside	1	-
MLSB	efmA	MDR	1	-
MLSB	QnrB20	fluoroquinolone	1	-
MLSB	Bifidobacteria_intrinsic_ileS_conferring_resistance_to_mupirocin	mupirocin	1	-
MLSB	catB2	phenicol	1	-
MLSB	EreA	MLSB	1	-
MLSB	Klebsiella_pneumoniae_OmpK37	beta lactam	1	-
MLSB	lsaB	MLSB	1	-
MLSB	PER-1	beta lactam	1	-
MLSB	vatA	MLSB	1	-
MLSB	dfrD	trimethoprim	1	-
MLSB	MCR-8	peptide	1	-
MLSB	sul4	sulfonamide	1	-
MLSB	VgbA	MLSB	1	-
MLSB	NDM-5	beta lactam	1	-
MLSB	QnrVC1	fluoroquinolone	1	-
MLSB	vanXYC	glycopeptide	1	-
MLSB	CTX-M-27	beta lactam	1	-
MLSB	OXA-209	beta lactam	1	-
MLSB	aadA9	aminoglycoside	1	-
MLSB	CMY-59	beta lactam	1	-
MLSB	CTX-M-24	beta lactam	1	-
MLSB	FosD	fosfomycin	1	-
MLSB	APH(2'')-Ie	aminoglycoside	1	-
MLSB	CTX-M-64	beta lactam	1	-
MLSB	EBR-2	beta lactam	1	-
MLSB	Tet(X3)	tetracycline	1	-
MLSB	vanWG	glycopeptide	1	-
MLSB	AAC(6')-Ib4	aminoglycoside	1	-
MLSB	aadA24	aminoglycoside	1	-
MLSB	BLA1	beta lactam	1	-
MLSB	cmlB1	phenicol	1	-
MLSB	dfrA20	trimethoprim	1	-
MLSB	lnuE	MLSB	1	-
MLSB	MUS-1_beta-lactamase	beta lactam	1	-
MLSB	QepA2	fluoroquinolone	1	-
MLSB	vanG	glycopeptide	1	-
MLSB	vanRC	glycopeptide	1	-
MLSB	vanSC	glycopeptide	1	-
MLSB	AAC(6')-Ib9	aminoglycoside	1	-
MLSB	aadA22	aminoglycoside	1	-
MLSB	CTX-M-15	beta lactam	1	-
MLSB	Enterobacter_cloacae_acrA	MDR	1	-
MLSB	FosA2	fosfomycin	1	-
MLSB	FosB	fosfomycin	1	-
MLSB	SHV-187	beta lactam	1	-
MLSB	vanC	glycopeptide	1	-
MLSB	vanRG	glycopeptide	1	-
MLSB	Bla2	beta lactam	1	-
MLSB	aadA11	aminoglycoside	1	-
MLSB	aadA7	aminoglycoside	1	-
MLSB	CARB-4	beta lactam	1	-
MLSB	CTX-M-123	beta lactam	1	-
MLSB	dfrA32	trimethoprim	1	-
MLSB	EreA2	MLSB	1	-
MLSB	vanTC	glycopeptide	1	-
MLSB	AAC(6')-Iai	aminoglycoside	1	-
MLSB	dfrA19	trimethoprim	1	-
MLSB	SHV-110	beta lactam	1	-
MLSB	tet(J)	tetracycline	1	-
MLSB	vanZF	glycopeptide	1	-
MLSB	AAC(6')-Ia	aminoglycoside	1	-
MLSB	MCR-3.11	peptide	1	-
MLSB	MexF	MDR	1	-
MLSB	mexK	MDR	1	-
MLSB	mphL	MLSB	1	-
MLSB	CTX-M-104	beta lactam	1	-
MLSB	Erm(36)	MLSB	1	-
MLSB	Erm(49)	MLSB	1	-
MLSB	QnrB5	fluoroquinolone	1	-
MLSB	tet(K)	tetracycline	1	-
MLSB	VEB-5	beta lactam	1	-
MLSB	vgaC	MLSB	1	-
MLSB	AAC(6')-IIc	aminoglycoside	1	-
MLSB	APH(3')-Ib	aminoglycoside	1	-
MLSB	catA4	phenicol	1	-
MLSB	CfxA	beta lactam	1	-
MLSB	dfrA6_from_Proteus_mirabilis	trimethoprim	1	-
MLSB	PER-4	beta lactam	1	-
MLSB	AAC(6')-Ib8	aminoglycoside	1	-
MLSB	AAC(6')-Iid	aminoglycoside	1	-
MLSB	ACI-1	beta lactam	1	-
MLSB	cmeB	MDR	1	-
MLSB	CTX-M-109	beta lactam	1	-
MLSB	dfrI	trimethoprim	1	-
MLSB	OXA-85	beta lactam	1	-
MLSB	VIM-4	beta lactam	1	-
MLSB	vga(E)_Staphylococcus_cohnii	MLSB	1	-
MLSB	ACT-25	beta lactam	1	-
MLSB	catII	phenicol	1	-
MLSB	CTX-M-148	beta lactam	1	-
MLSB	dfrA5	trimethoprim	1	-
MLSB	QnrB2	fluoroquinolone	1	-
MLSB	QnrB26	fluoroquinolone	1	-
MLSB	smeE	MDR	1	-
MLSB	catB10	phenicol	1	-
MLSB	aadA3	aminoglycoside	1	-
MLSB	CARB-1	beta lactam	1	-
MLSB	clcD	MLSB	1	-
MLSB	dfrB1	trimethoprim	1	-
MLSB	dfrB4	trimethoprim	1	-
MLSB	Enterococcus_faecalis_chloramphenicol_acetyltransferase	phenicol	1	-
MLSB	NDM-14	beta lactam	1	-
MLSB	sdiA	MDR	1	-
MLSB	TEM-122	beta lactam	1	-
MLSB	TEM-150	beta lactam	1	-
MLSB	vatB	MLSB	1	-
MLSB	vatD	MLSB	1	-
MLSB	MUS-2_beta-lactamase	beta lactam	1	-
MLSB	OXA-465	beta lactam	1	-
MLSB	AAC(6')-Ib10	aminoglycoside	1	-
MLSB	AAC(6')-Ic	aminoglycoside	1	-
MLSB	aadA8	aminoglycoside	1	-
MLSB	aadA8b	aminoglycoside	1	-
MLSB	CARB-14	beta lactam	1	-
MLSB	Clostridium_perfringens_mprF	peptide	1	-
MLSB	CMH-1	beta lactam	1	-
MLSB	CTX-M-3	beta lactam	1	-
MLSB	dfrA6	trimethoprim	1	-
MLSB	SHV-11	beta lactam	1	-
MLSB	SRT-1	beta lactam	1	-
MLSB	tet(41)	tetracycline	1	-
MLSB	TUS-1_beta-lactamase	beta lactam	1	-
MLSB	AxyX	MDR	1	-
MLSB	Erm(43)	MLSB	1	-
MLSB	OXA-17	beta lactam	1	-
MLSB	OXA-205	beta lactam	1	-
MLSB	OprZ	MDR	1	-
MLSB	PC1_beta-lactamase_(blaZ)	beta lactam	1	-
MLSB	aadA12	aminoglycoside	1	-
MLSB	aadA6	aminoglycoside	1	-
MLSB	mecA	beta lactam	1	-
MLSB	mecR1	beta lactam	1	-
MLSB	mphC	MLSB	1	-
MLSB	vgaALC	MLSB	1	-
MLSB	AAC(6')-Ib-Hangzhou	aminoglycoside	1	-
MLSB	APH(6)-Ic	aminoglycoside	1	-
MLSB	CTX-M-114	beta lactam	1	-
MLSB	CTX-M-9	beta lactam	1	-
MLSB	FONA-5	beta lactam	1	-
MLSB	FosB5	fosfomycin	1	-
MLSB	IMP-3	beta lactam	1	-
MLSB	MexE	MDR	1	-
MLSB	MIR-12	beta lactam	1	-
MLSB	MOX-6	beta lactam	1	-
MLSB	mtrA	MDR	1	-
MLSB	OprJ	MDR	1	-
MLSB	OXA-246	beta lactam	1	-
MLSB	OXA-257	beta lactam	1	-
MLSB	OXA-427	beta lactam	1	-
MLSB	tet(E)	tetracycline	1	-
MLSB	ACT-30	beta lactam	1	-
MLSB	AxyY	MDR	1	-
MLSB	LAP-1	fluoroquinolone	1	-
MLSB	NPS-1	beta lactam	1	-
MLSB	OXA-119	beta lactam	1	-
MLSB	OXA-45	beta lactam	1	-
MLSB	VIM-1	beta lactam	1	-
MLSB	VIM-14	beta lactam	1	-
MLSB	dfrB3	trimethoprim	1	-
tetracycline	APH(4)-Ia	aminoglycoside	1	-
tetracycline	sul1	sulfonamide	1	-
tetracycline	Escherichia_coli_mdfA	MDR	1	-
tetracycline	mdtG	fosfomycin	1	-
tetracycline	acrB	MDR	1	-
tetracycline	ErmA	MLSB	1	-
tetracycline	mdtC	MDR	1	-
tetracycline	catA8	phenicol	1	-
tetracycline	linG	MLSB	1	-
tetracycline	sul3	sulfonamide	1	-
tetracycline	optrA	MLSB	1	-
tetracycline	CTX-M-55	beta lactam	1	-
tetracycline	dfrF	trimethoprim	1	-
tetracycline	AAC(6')-Im	aminoglycoside	1	-
tetracycline	catP	phenicol	1	-
tetracycline	APH(2'')-If	aminoglycoside	1	-
tetracycline	APH(2'')-Ig	aminoglycoside	1	-
tetracycline	dfrA17	trimethoprim	1	-
tetracycline	Mef(En2)	MLSB	1	-
tetracycline	arr-2	rifamycin	1	-
tetracycline	CfxA3	beta lactam	1	-
tetracycline	cmx	phenicol	1	-
tetracycline	APH(2'')-IVa	aminoglycoside	1	-
tetracycline	lnuG	MLSB	1	-
tetracycline	ErmX	MLSB	1	-
tetracycline	AAC(6')-Ib-cr	aminoglycoside	1	-
tetracycline	cmlA1	phenicol	1	-
tetracycline	CTX-M-65	beta lactam	1	-
tetracycline	CcrA_beta-lactamase	beta lactam	1	-
tetracycline	cmlA5	phenicol	1	-
tetracycline	tetB(P)	tetracycline	1	-
tetracycline	APH(3')-VIIa	aminoglycoside	1	-
tetracycline	tetA(P)	tetracycline	1	-
tetracycline	tet(Z)	tetracycline	1	-
tetracycline	LnuP	MLSB	1	-
tetracycline	EreD	MLSB	1	-
tetracycline	APH(2'')-IIIa	aminoglycoside	1	-
tetracycline	CfxA2	beta lactam	1	-
tetracycline	APH(3')-VIa	aminoglycoside	1	-
tetracycline	CTX-M-14	beta lactam	1	-
tetracycline	Klebsiella_pneumoniae_KpnH	MDR	1	-
tetracycline	tet(W/N/W)	tetracycline	1	-
tetracycline	dfrE	trimethoprim	1	-
tetracycline	AAC(6')-Iih	aminoglycoside	1	-
tetracycline	ErmQ	MLSB	1	-
tetracycline	QnrS2	fluoroquinolone	1	-
tetracycline	catQ	phenicol	1	-
tetracycline	cmlA6	phenicol	1	-
tetracycline	emeA	MDR	1	-
tetracycline	LAP-2	fluoroquinolone	1	-
tetracycline	AAC(3)-IIe	aminoglycoside	1	-
tetracycline	cepA_beta-lactamase	beta lactam	1	-
tetracycline	efrB	MDR	1	-
tetracycline	efrA	MDR	1	-
tetracycline	catB8	phenicol	1	-
tetracycline	catII_from_Escherichia_coli_K-12	phenicol	1	-
tetracycline	FosA6	fosfomycin	1	-
tetracycline	lsaA	MLSB	1	-
tetracycline	AAC(6')-Ii	aminoglycoside	1	-
tetracycline	CblA-1	beta lactam	1	-
tetracycline	cfrC	MLSB	1	-
tetracycline	FosB1	fosfomycin	1	-
tetracycline	FosK	fosfomycin	1	-
tetracycline	Klebsiella_pneumoniae_KpnG	MDR	1	-
tetracycline	QnrB4	fluoroquinolone	1	-
tetracycline	catB11	phenicol	1	-
tetracycline	Klebsiella_pneumoniae_KpnF	MDR	1	-
tetracycline	CfxA6	beta lactam	1	-
tetracycline	tetT	tetracycline	1	-
tetracycline	tetU	tetracycline	1	-
tetracycline	QnrVC6	fluoroquinolone	1	-
tetracycline	aphA15	aminoglycoside	1	-
tetracycline	Klebsiella_pneumoniae_acrA	MDR	1	-
tetracycline	Klebsiella_pneumoniae_KpnE	MDR	1	-
tetracycline	QnrA1	fluoroquinolone	1	-
tetracycline	MOX-3	beta lactam	1	-
tetracycline	CARB-16	beta lactam	1	-
tetracycline	dfrK	trimethoprim	1	-
tetracycline	Bifidobacterium_adolescentis_rpoB_conferring_resistance_to_rifampicin	rifamycin	1	-
tetracycline	msrC	MLSB	1	-
tetracycline	aadA13	aminoglycoside	1	-
tetracycline	efmA	MDR	1	-
tetracycline	QnrB20	fluoroquinolone	1	-
tetracycline	Bifidobacteria_intrinsic_ileS_conferring_resistance_to_mupirocin	mupirocin	1	-
tetracycline	EreA	MLSB	1	-
tetracycline	Klebsiella_pneumoniae_OmpK37	beta lactam	1	-
tetracycline	PER-1	beta lactam	1	-
tetracycline	vatA	MLSB	1	-
tetracycline	MCR-8	peptide	1	-
tetracycline	sul4	sulfonamide	1	-
tetracycline	VgbA	MLSB	1	-
tetracycline	NDM-5	beta lactam	1	-
tetracycline	QnrVC1	fluoroquinolone	1	-
tetracycline	vanXYC	glycopeptide	1	-
tetracycline	CTX-M-27	beta lactam	1	-
tetracycline	OXA-209	beta lactam	1	-
tetracycline	aadA9	aminoglycoside	1	-
tetracycline	CMY-59	beta lactam	1	-
tetracycline	CTX-M-24	beta lactam	1	-
tetracycline	FosD	fosfomycin	1	-
tetracycline	APH(2'')-Ie	aminoglycoside	1	-
tetracycline	CTX-M-64	beta lactam	1	-
tetracycline	EBR-2	beta lactam	1	-
tetracycline	Tet(X3)	tetracycline	1	-
tetracycline	vanWG	glycopeptide	1	-
tetracycline	AAC(6')-Ib4	aminoglycoside	1	-
tetracycline	aadA24	aminoglycoside	1	-
tetracycline	BLA1	beta lactam	1	-
tetracycline	cmlB1	phenicol	1	-
tetracycline	dfrA20	trimethoprim	1	-
tetracycline	lnuE	MLSB	1	-
tetracycline	MUS-1_beta-lactamase	beta lactam	1	-
tetracycline	QepA2	fluoroquinolone	1	-
tetracycline	vanG	glycopeptide	1	-
tetracycline	vanRC	glycopeptide	1	-
tetracycline	vanSC	glycopeptide	1	-
tetracycline	AAC(6')-Ib9	aminoglycoside	1	-
tetracycline	aadA22	aminoglycoside	1	-
tetracycline	CTX-M-15	beta lactam	1	-
tetracycline	Enterobacter_cloacae_acrA	MDR	1	-
tetracycline	FosA2	fosfomycin	1	-
tetracycline	FosB	fosfomycin	1	-
tetracycline	SHV-187	beta lactam	1	-
tetracycline	vanC	glycopeptide	1	-
tetracycline	vanRG	glycopeptide	1	-
tetracycline	Bla2	beta lactam	1	-
tetracycline	aadA11	aminoglycoside	1	-
tetracycline	aadA7	aminoglycoside	1	-
tetracycline	CARB-4	beta lactam	1	-
tetracycline	CTX-M-123	beta lactam	1	-
tetracycline	dfrA32	trimethoprim	1	-
tetracycline	EreA2	MLSB	1	-
tetracycline	vanTC	glycopeptide	1	-
tetracycline	AAC(6')-Iai	aminoglycoside	1	-
tetracycline	dfrA19	trimethoprim	1	-
tetracycline	SHV-110	beta lactam	1	-
tetracycline	tet(J)	tetracycline	1	-
tetracycline	vanZF	glycopeptide	1	-
tetracycline	AAC(6')-Ia	aminoglycoside	1	-
tetracycline	MCR-3.11	peptide	1	-
tetracycline	MexF	MDR	1	-
tetracycline	mexK	MDR	1	-
tetracycline	mphL	MLSB	1	-
tetracycline	CTX-M-104	beta lactam	1	-
tetracycline	Erm(36)	MLSB	1	-
tetracycline	Erm(49)	MLSB	1	-
tetracycline	QnrB5	fluoroquinolone	1	-
tetracycline	tet(K)	tetracycline	1	-
tetracycline	VEB-5	beta lactam	1	-
tetracycline	vgaC	MLSB	1	-
tetracycline	AAC(6')-IIc	aminoglycoside	1	-
tetracycline	APH(3')-Ib	aminoglycoside	1	-
tetracycline	catA4	phenicol	1	-
tetracycline	CfxA	beta lactam	1	-
tetracycline	dfrA6_from_Proteus_mirabilis	trimethoprim	1	-
tetracycline	PER-4	beta lactam	1	-
tetracycline	AAC(6')-Ib8	aminoglycoside	1	-
tetracycline	AAC(6')-Iid	aminoglycoside	1	-
tetracycline	ACI-1	beta lactam	1	-
tetracycline	cmeB	MDR	1	-
tetracycline	CTX-M-109	beta lactam	1	-
tetracycline	dfrI	trimethoprim	1	-
tetracycline	OXA-85	beta lactam	1	-
tetracycline	VIM-4	beta lactam	1	-
tetracycline	vga(E)_Staphylococcus_cohnii	MLSB	1	-
tetracycline	ACT-25	beta lactam	1	-
tetracycline	catII	phenicol	1	-
tetracycline	CTX-M-148	beta lactam	1	-
tetracycline	dfrA5	trimethoprim	1	-
tetracycline	QnrB2	fluoroquinolone	1	-
tetracycline	QnrB26	fluoroquinolone	1	-
tetracycline	smeE	MDR	1	-
tetracycline	catB10	phenicol	1	-
tetracycline	aadA3	aminoglycoside	1	-
tetracycline	CARB-1	beta lactam	1	-
tetracycline	clcD	MLSB	1	-
tetracycline	dfrB1	trimethoprim	1	-
tetracycline	dfrB4	trimethoprim	1	-
tetracycline	Enterococcus_faecalis_chloramphenicol_acetyltransferase	phenicol	1	-
tetracycline	NDM-14	beta lactam	1	-
tetracycline	sdiA	MDR	1	-
tetracycline	TEM-122	beta lactam	1	-
tetracycline	TEM-150	beta lactam	1	-
tetracycline	vatB	MLSB	1	-
tetracycline	vatD	MLSB	1	-
tetracycline	MUS-2_beta-lactamase	beta lactam	1	-
tetracycline	OXA-465	beta lactam	1	-
tetracycline	AAC(6')-Ib10	aminoglycoside	1	-
tetracycline	AAC(6')-Ic	aminoglycoside	1	-
tetracycline	aadA8	aminoglycoside	1	-
tetracycline	aadA8b	aminoglycoside	1	-
tetracycline	CARB-14	beta lactam	1	-
tetracycline	Clostridium_perfringens_mprF	peptide	1	-
tetracycline	CMH-1	beta lactam	1	-
tetracycline	CTX-M-3	beta lactam	1	-
tetracycline	dfrA6	trimethoprim	1	-
tetracycline	SHV-11	beta lactam	1	-
tetracycline	SRT-1	beta lactam	1	-
tetracycline	tet(41)	tetracycline	1	-
tetracycline	TUS-1_beta-lactamase	beta lactam	1	-
tetracycline	AxyX	MDR	1	-
tetracycline	Erm(43)	MLSB	1	-
tetracycline	OXA-17	beta lactam	1	-
tetracycline	OXA-205	beta lactam	1	-
tetracycline	OprZ	MDR	1	-
tetracycline	PC1_beta-lactamase_(blaZ)	beta lactam	1	-
tetracycline	aadA12	aminoglycoside	1	-
tetracycline	aadA6	aminoglycoside	1	-
tetracycline	mecA	beta lactam	1	-
tetracycline	mecR1	beta lactam	1	-
tetracycline	mphC	MLSB	1	-
tetracycline	vgaALC	MLSB	1	-
tetracycline	AAC(6')-Ib-Hangzhou	aminoglycoside	1	-
tetracycline	APH(6)-Ic	aminoglycoside	1	-
tetracycline	CTX-M-114	beta lactam	1	-
tetracycline	CTX-M-9	beta lactam	1	-
tetracycline	FONA-5	beta lactam	1	-
tetracycline	FosB5	fosfomycin	1	-
tetracycline	IMP-3	beta lactam	1	-
tetracycline	MexE	MDR	1	-
tetracycline	MIR-12	beta lactam	1	-
tetracycline	MOX-6	beta lactam	1	-
tetracycline	mtrA	MDR	1	-
tetracycline	OprJ	MDR	1	-
tetracycline	OXA-246	beta lactam	1	-
tetracycline	OXA-257	beta lactam	1	-
tetracycline	OXA-427	beta lactam	1	-
tetracycline	tet(E)	tetracycline	1	-
tetracycline	ACT-30	beta lactam	1	-
tetracycline	AxyY	MDR	1	-
tetracycline	LAP-1	fluoroquinolone	1	-
tetracycline	NPS-1	beta lactam	1	-
tetracycline	OXA-119	beta lactam	1	-
tetracycline	OXA-45	beta lactam	1	-
tetracycline	VIM-1	beta lactam	1	-
tetracycline	VIM-14	beta lactam	1	-
tetracycline	dfrB3	trimethoprim	1	-

## Sheet: Species
Usage	species	pvalue	Relation
tetracycline	Weissella_thailandensis	0.000171454	Increase
lincosamide	Bacillus_cereus_group	0.00018395	Increase
lincosamide	Enorma_massiliensis	0.000402741	Decrease
tetracycline	Alistipes_sp_An66	0.00121089	Increase
tetracycline	Weissella_paramesenteroides	0.00184086	Increase
tetracycline	Weissella_jogaejeotgali	0.0026895	Increase
tetracycline	Proteus_mirabilis	0.00420052	Increase
tetracycline	Proteus_hauseri	0.00480862	Increase
tetracycline	Lysinibacillus_sp_BF_4	0.0174645	Increase
tetracycline	Jeotgalibaca_sp_PTS2502	0.0330434	Increase
tetracycline	Wohlfahrtiimonas_chitiniclastica	0.0944946	-
tetracycline	Paenalcaligenes_hominis	0.103209	-
beta lactams	Weissella_thailandensis	0.11504	-
tetracycline	Erysipelothrix_larvae	0.125484	-
tetracycline	Proteus_vulgaris	0.135014	-
MLSB	Lactobacillus_brevis	0.162574	-
tetracycline	Globicatella_sulfidifaciens	0.165832	-
lincosamide	Lysinibacillus_sp_BF_4	0.182374	-
tetracycline	Providencia_rettgeri	0.244065	-
MLSB	Weissella_thailandensis	0.272072	-
MLSB	Pediococcus_pentosaceus	0.297125	-
tetracycline	Oligella_ureolytica	0.312758	-
tetracycline	Globicatella_sanguinis	0.363987	-
tetracycline	Alcaligenes_faecalis	0.37758	-
lincosamide	Jeotgalibaca_sp_PTS2502	0.408173	-
lincosamide	Enterococcus_cecorum	0.424338	-
tetracycline	Myroides_odoratimimus	0.426553	-
tetracycline	Gemella_asaccharolytica	0.456333	-
beta lactams	Weissella_jogaejeotgali	0.531448	-
lincosamide	Lactobacillus_aviarius	0.602954	-
MLSB	Lactobacillus_crispatus	0.706996	-
lincosamide	Oligella_ureolytica	0.750669	-
lincosamide	Paenalcaligenes_hominis	0.779031	-
beta lactams	Bacillus_cereus_group	0.797303	-
beta lactams	Enterococcus_gallinarum	0.880983	-
MLSB	Bacillus_cereus_group	0.954724	-
MLSB	Weissella_jogaejeotgali	0.962646	-
lincosamide	Proteus_hauseri	0.988073	-
beta lactams	[Collinsella]_massiliensis	1	-
beta lactams	Acholeplasma_brassicae	1	-
beta lactams	Acholeplasma_laidlawii	1	-
beta lactams	Acinetobacter_lwoffii	1	-
beta lactams	Acinetobacter_radioresistens	1	-
beta lactams	Acinetobacter_sp_WCHAc060041	1	-
beta lactams	Acinetobacter_towneri	1	-
beta lactams	Actinomycetaceae_bacterium_sk1b4	1	-
beta lactams	Aequorivita_viscosa	1	-
beta lactams	Aeromonas_caviae	1	-
beta lactams	Aeromonas_media	1	-
beta lactams	Alcaligenes_aquatilis	1	-
beta lactams	Alcaligenes_faecalis	1	-
beta lactams	Alistipes_finegoldii	1	-
beta lactams	Alistipes_indistinctus	1	-
beta lactams	Alistipes_inops	1	-
beta lactams	Alistipes_onderdonkii	1	-
beta lactams	Alistipes_sp_An66	1	-
beta lactams	Anaerosphaera_aminiphila	1	-
beta lactams	Aquamicrobium_aerolatum	1	-
beta lactams	Arcobacter_porcinus	1	-
beta lactams	Arcobacter_skirrowii	1	-
beta lactams	Arcobacter_thereius	1	-
beta lactams	Aspergillus_glaucus	1	-
beta lactams	Atopostipes_suicloacalis	1	-
beta lactams	Bacteroides_caccae	1	-
beta lactams	Bacteroides_clarus	1	-
beta lactams	Bacteroides_faecis	1	-
beta lactams	Bacteroides_finegoldii	1	-
beta lactams	Bacteroides_intestinalis	1	-
beta lactams	Bacteroides_massiliensis	1	-
beta lactams	Bacteroides_reticulotermitis	1	-
beta lactams	Bacteroides_salyersiae	1	-
beta lactams	Bacteroides_stercorirosoris	1	-
beta lactams	Bacteroides_stercoris	1	-
beta lactams	Bacteroides_vulgatus	1	-
beta lactams	Bacteroides_xylanisolvens	1	-
beta lactams	Barnesiella_intestinihominis	1	-
beta lactams	Bavariicoccus_seileri	1	-
beta lactams	Bifidobacterium_pseudocatenulatum	1	-
beta lactams	Blautia_sp_An249	1	-
beta lactams	Bordetella_trematum	1	-
beta lactams	Brevibacterium_luteolum	1	-
beta lactams	Brevundimonas_diminuta	1	-
beta lactams	Butyricimonas_synergistica	1	-
beta lactams	Butyricimonas_virosa	1	-
beta lactams	Campylobacter_coli	1	-
beta lactams	Candida_tropicalis	1	-
beta lactams	Chryseobacterium_sp_VAUSW3	1	-
beta lactams	Chryseobacterium_sp_YLOS41	1	-
beta lactams	Citrobacter_braakii	1	-
beta lactams	Citrobacter_portucalensis	1	-
beta lactams	Citrobacter_sp_50677481	1	-
beta lactams	Clostridium_baratii	1	-
beta lactams	Clostridium_butyricum	1	-
beta lactams	Clostridium_paraputrificum	1	-
beta lactams	Clostridium_perfringens	1	-
beta lactams	Clostridium_sp_7_2_43FAA	1	-
beta lactams	Clostridium_sp_C105KSO13	1	-
beta lactams	Corynebacterium_amycolatum	1	-
beta lactams	Corynebacterium_casei	1	-
beta lactams	Corynebacterium_deserti	1	-
beta lactams	Corynebacterium_nuruki	1	-
beta lactams	Corynebacterium_urealyticum	1	-
beta lactams	Corynebacterium_variabile	1	-
beta lactams	Cryptosporidium_meleagridis	1	-
beta lactams	Cryptosporidium_parvum	1	-
beta lactams	Desemzia_incerta	1	-
beta lactams	Empedobacter_falsenii	1	-
beta lactams	Enorma_massiliensis	1	-
beta lactams	Enterobacter_mori	1	-
beta lactams	Enterococcus_avium	1	-
beta lactams	Enterococcus_cecorum	1	-
beta lactams	Enterococcus_saccharolyticus	1	-
beta lactams	Erysipelothrix_larvae	1	-
beta lactams	Erysipelotrichaceae_bacterium_MTC7	1	-
beta lactams	Escherichia_coli	1	-
beta lactams	Escherichia_fergusonii	1	-
beta lactams	Eubacterium_aggregans	1	-
beta lactams	Eubacterium_limosum	1	-
beta lactams	Eubacterium_sp_CAG_180	1	-
beta lactams	Faecalibacterium_prausnitzii	1	-
beta lactams	Falsochrobactrum_sp_HN4	1	-
beta lactams	Fermentimonas_caenicola	1	-
beta lactams	Flavobacteriaceae_bacterium_UR159	1	-
beta lactams	Flavonifractor_sp_An10	1	-
beta lactams	Fusobacterium_ulcerans	1	-
beta lactams	Galbibacter_marinus	1	-
beta lactams	Gemella_asaccharolytica	1	-
beta lactams	Globicatella_sanguinis	1	-
beta lactams	Globicatella_sulfidifaciens	1	-
beta lactams	Glutamicibacter_mysorens	1	-
beta lactams	Gordonibacter_pamelaeae	1	-
beta lactams	Halomonas_campaniensis	1	-
beta lactams	Helicobacter_pullorum	1	-
beta lactams	Ignatzschineria_cameli	1	-
beta lactams	Ignatzschineria_indica	1	-
beta lactams	Jeotgalibaca_sp_PTS2502	1	-
beta lactams	Klebsiella_pneumoniae	1	-
beta lactams	Klebsiella_quasipneumoniae	1	-
beta lactams	Klebsiella_variicola	1	-
beta lactams	Kurthia_zopfii	1	-
beta lactams	Lachnoclostridium_sp_An118	1	-
beta lactams	Lachnoclostridium_sp_An14	1	-
beta lactams	Lachnoclostridium_sp_An169	1	-
beta lactams	Lachnoclostridium_sp_An298	1	-
beta lactams	Lachnoclostridium_sp_An76	1	-
beta lactams	Lactobacillus_acidipiscis	1	-
beta lactams	Lactobacillus_aviarius	1	-
beta lactams	Lactobacillus_brevis	1	-
beta lactams	Lactobacillus_crispatus	1	-
beta lactams	Lactobacillus_curvatus	1	-
beta lactams	Lactobacillus_futsaii	1	-
beta lactams	Lactobacillus_gallinarum	1	-
beta lactams	Lactobacillus_intestinalis	1	-
beta lactams	Lactobacillus_murinus	1	-
beta lactams	Lactobacillus_odoratitofui	1	-
beta lactams	Lactobacillus_panis	1	-
beta lactams	Lactobacillus_paralimentarius	1	-
beta lactams	Lactobacillus_tucceti	1	-
beta lactams	Lactobacillus_vaccinostercus	1	-
beta lactams	Lactococcus_lactis	1	-
beta lactams	Leuconostoc_citreum	1	-
beta lactams	Lysinibacillus_sp_BF_4	1	-
beta lactams	Lysobacter_defluvii	1	-
beta lactams	Massiliomicrobiota_timonensis	1	-
beta lactams	Micrococcus_terreus	1	-
beta lactams	Mobilicoccus_pelagius	1	-
beta lactams	Mycoplasma_yeatsii	1	-
beta lactams	Myroides_odoratimimus	1	-
beta lactams	Oenococcus_alcoholitolerans	1	-
beta lactams	Oligella_ureolytica	1	-
beta lactams	Paenalcaligenes_hominis	1	-
beta lactams	Parabacteroides_distasonis	1	-
beta lactams	Parabacteroides_merdae	1	-
beta lactams	Paraclostridium_benzoelyticum	1	-
beta lactams	Paracoccus_alcaliphilus	1	-
beta lactams	Paracoccus_alkenifer	1	-
beta lactams	Paracoccus_solventivorans	1	-
beta lactams	Paracoccus_sp_CBA4604	1	-
beta lactams	Pediococcus_pentosaceus	1	-
beta lactams	Pediococcus_stilesii	1	-
beta lactams	Pelagibacterium_sp_XYN52	1	-
beta lactams	Peptoniphilus_harei	1	-
beta lactams	Peptoniphilus_sp_ING2_D1G	1	-
beta lactams	Petrimonas_mucosa	1	-
beta lactams	Pisciglobus_halotolerans	1	-
beta lactams	Pontibaca_methylaminivorans	1	-
beta lactams	Prevotella_sp_AM42_24	1	-
beta lactams	Prevotella_sp_MGM2	1	-
beta lactams	Proteiniphilum_saccharofermentans	1	-
beta lactams	Proteus_hauseri	1	-
beta lactams	Proteus_mirabilis	1	-
beta lactams	Proteus_vulgaris	1	-
beta lactams	Providencia_alcalifaciens	1	-
beta lactams	Providencia_rettgeri	1	-
beta lactams	Pseudochrobactrum_asaccharolyticum	1	-
beta lactams	Pseudoflavonifractor_capillosus	1	-
beta lactams	Psychrobacter_cryohalolentis	1	-
beta lactams	Psychrobacter_pacificensis	1	-
beta lactams	Psychrobacter_pasteurii	1	-
beta lactams	Romboutsia_ilealis	1	-
beta lactams	Ruminococcaceae_bacterium_D16	1	-
beta lactams	Sellimonas_intestinalis	1	-
beta lactams	Serratia_marcescens	1	-
beta lactams	Shewanella_algae	1	-
beta lactams	Sphingobacterium_cellulitidis	1	-
beta lactams	Sphingobacterium_mizutaii	1	-
beta lactams	Sphingobacterium_paucimobilis	1	-
beta lactams	Staphylococcus_agnetis	1	-
beta lactams	Staphylococcus_aureus	1	-
beta lactams	Staphylococcus_chromogenes	1	-
beta lactams	Staphylococcus_condimenti	1	-
beta lactams	Staphylococcus_gallinarum	1	-
beta lactams	Staphylococcus_lentus	1	-
beta lactams	Staphylococcus_nepalensis	1	-
beta lactams	Staphylococcus_piscifermentans	1	-
beta lactams	Staphylococcus_xylosus	1	-
beta lactams	Streptococcus_ferus	1	-
beta lactams	Streptococcus_infantarius	1	-
beta lactams	Subdoligranulum_variabile	1	-
beta lactams	Turicimonas_muris	1	-
beta lactams	Vagococcus_lutrae	1	-
beta lactams	Weissella_hellenica	1	-
beta lactams	Weissella_paramesenteroides	1	-
beta lactams	Wohlfahrtiimonas_chitiniclastica	1	-
beta lactams	Wohlfahrtiimonas_sp_G9077	1	-
lincosamide	[Collinsella]_massiliensis	1	-
lincosamide	Acholeplasma_brassicae	1	-
lincosamide	Acholeplasma_laidlawii	1	-
lincosamide	Acinetobacter_lwoffii	1	-
lincosamide	Acinetobacter_radioresistens	1	-
lincosamide	Acinetobacter_sp_WCHAc060041	1	-
lincosamide	Acinetobacter_towneri	1	-
lincosamide	Actinomycetaceae_bacterium_sk1b4	1	-
lincosamide	Aequorivita_viscosa	1	-
lincosamide	Aeromonas_caviae	1	-
lincosamide	Aeromonas_media	1	-
lincosamide	Alcaligenes_aquatilis	1	-
lincosamide	Alcaligenes_faecalis	1	-
lincosamide	Alistipes_finegoldii	1	-
lincosamide	Alistipes_indistinctus	1	-
lincosamide	Alistipes_inops	1	-
lincosamide	Alistipes_onderdonkii	1	-
lincosamide	Alistipes_sp_An66	1	-
lincosamide	Anaerosphaera_aminiphila	1	-
lincosamide	Aquamicrobium_aerolatum	1	-
lincosamide	Arcobacter_porcinus	1	-
lincosamide	Arcobacter_skirrowii	1	-
lincosamide	Arcobacter_thereius	1	-
lincosamide	Aspergillus_glaucus	1	-
lincosamide	Atopostipes_suicloacalis	1	-
lincosamide	Bacteroides_caccae	1	-
lincosamide	Bacteroides_clarus	1	-
lincosamide	Bacteroides_faecis	1	-
lincosamide	Bacteroides_finegoldii	1	-
lincosamide	Bacteroides_intestinalis	1	-
lincosamide	Bacteroides_massiliensis	1	-
lincosamide	Bacteroides_reticulotermitis	1	-
lincosamide	Bacteroides_salyersiae	1	-
lincosamide	Bacteroides_stercorirosoris	1	-
lincosamide	Bacteroides_stercoris	1	-
lincosamide	Bacteroides_vulgatus	1	-
lincosamide	Bacteroides_xylanisolvens	1	-
lincosamide	Barnesiella_intestinihominis	1	-
lincosamide	Bavariicoccus_seileri	1	-
lincosamide	Bifidobacterium_pseudocatenulatum	1	-
lincosamide	Blautia_sp_An249	1	-
lincosamide	Bordetella_trematum	1	-
lincosamide	Brevibacterium_luteolum	1	-
lincosamide	Brevundimonas_diminuta	1	-
lincosamide	Butyricimonas_synergistica	1	-
lincosamide	Butyricimonas_virosa	1	-
lincosamide	Campylobacter_coli	1	-
lincosamide	Candida_tropicalis	1	-
lincosamide	Chryseobacterium_sp_VAUSW3	1	-
lincosamide	Chryseobacterium_sp_YLOS41	1	-
lincosamide	Citrobacter_braakii	1	-
lincosamide	Citrobacter_portucalensis	1	-
lincosamide	Citrobacter_sp_50677481	1	-
lincosamide	Clostridium_baratii	1	-
lincosamide	Clostridium_butyricum	1	-
lincosamide	Clostridium_paraputrificum	1	-
lincosamide	Clostridium_perfringens	1	-
lincosamide	Clostridium_sp_7_2_43FAA	1	-
lincosamide	Clostridium_sp_C105KSO13	1	-
lincosamide	Corynebacterium_amycolatum	1	-
lincosamide	Corynebacterium_casei	1	-
lincosamide	Corynebacterium_deserti	1	-
lincosamide	Corynebacterium_nuruki	1	-
lincosamide	Corynebacterium_urealyticum	1	-
lincosamide	Corynebacterium_variabile	1	-
lincosamide	Cryptosporidium_meleagridis	1	-
lincosamide	Cryptosporidium_parvum	1	-
lincosamide	Desemzia_incerta	1	-
lincosamide	Empedobacter_falsenii	1	-
lincosamide	Enterobacter_mori	1	-
lincosamide	Enterococcus_avium	1	-
lincosamide	Enterococcus_gallinarum	1	-
lincosamide	Enterococcus_saccharolyticus	1	-
lincosamide	Erysipelothrix_larvae	1	-
lincosamide	Erysipelotrichaceae_bacterium_MTC7	1	-
lincosamide	Escherichia_coli	1	-
lincosamide	Escherichia_fergusonii	1	-
lincosamide	Eubacterium_aggregans	1	-
lincosamide	Eubacterium_limosum	1	-
lincosamide	Eubacterium_sp_CAG_180	1	-
lincosamide	Faecalibacterium_prausnitzii	1	-
lincosamide	Falsochrobactrum_sp_HN4	1	-
lincosamide	Fermentimonas_caenicola	1	-
lincosamide	Flavobacteriaceae_bacterium_UR159	1	-
lincosamide	Flavonifractor_sp_An10	1	-
lincosamide	Fusobacterium_ulcerans	1	-
lincosamide	Galbibacter_marinus	1	-
lincosamide	Gemella_asaccharolytica	1	-
lincosamide	Globicatella_sanguinis	1	-
lincosamide	Globicatella_sulfidifaciens	1	-
lincosamide	Glutamicibacter_mysorens	1	-
lincosamide	Gordonibacter_pamelaeae	1	-
lincosamide	Halomonas_campaniensis	1	-
lincosamide	Helicobacter_pullorum	1	-
lincosamide	Ignatzschineria_cameli	1	-
lincosamide	Ignatzschineria_indica	1	-
lincosamide	Klebsiella_pneumoniae	1	-
lincosamide	Klebsiella_quasipneumoniae	1	-
lincosamide	Klebsiella_variicola	1	-
lincosamide	Kurthia_zopfii	1	-
lincosamide	Lachnoclostridium_sp_An118	1	-
lincosamide	Lachnoclostridium_sp_An14	1	-
lincosamide	Lachnoclostridium_sp_An169	1	-
lincosamide	Lachnoclostridium_sp_An298	1	-
lincosamide	Lachnoclostridium_sp_An76	1	-
lincosamide	Lactobacillus_acidipiscis	1	-
lincosamide	Lactobacillus_brevis	1	-
lincosamide	Lactobacillus_crispatus	1	-
lincosamide	Lactobacillus_curvatus	1	-
lincosamide	Lactobacillus_futsaii	1	-
lincosamide	Lactobacillus_gallinarum	1	-
lincosamide	Lactobacillus_intestinalis	1	-
lincosamide	Lactobacillus_murinus	1	-
lincosamide	Lactobacillus_odoratitofui	1	-
lincosamide	Lactobacillus_panis	1	-
lincosamide	Lactobacillus_paralimentarius	1	-
lincosamide	Lactobacillus_tucceti	1	-
lincosamide	Lactobacillus_vaccinostercus	1	-
lincosamide	Lactococcus_lactis	1	-
lincosamide	Leuconostoc_citreum	1	-
lincosamide	Lysobacter_defluvii	1	-
lincosamide	Massiliomicrobiota_timonensis	1	-
lincosamide	Micrococcus_terreus	1	-
lincosamide	Mobilicoccus_pelagius	1	-
lincosamide	Mycoplasma_yeatsii	1	-
lincosamide	Myroides_odoratimimus	1	-
lincosamide	Oenococcus_alcoholitolerans	1	-
lincosamide	Parabacteroides_distasonis	1	-
lincosamide	Parabacteroides_merdae	1	-
lincosamide	Paraclostridium_benzoelyticum	1	-
lincosamide	Paracoccus_alcaliphilus	1	-
lincosamide	Paracoccus_alkenifer	1	-
lincosamide	Paracoccus_solventivorans	1	-
lincosamide	Paracoccus_sp_CBA4604	1	-
lincosamide	Pediococcus_pentosaceus	1	-
lincosamide	Pediococcus_stilesii	1	-
lincosamide	Pelagibacterium_sp_XYN52	1	-
lincosamide	Peptoniphilus_harei	1	-
lincosamide	Peptoniphilus_sp_ING2_D1G	1	-
lincosamide	Petrimonas_mucosa	1	-
lincosamide	Pisciglobus_halotolerans	1	-
lincosamide	Pontibaca_methylaminivorans	1	-
lincosamide	Prevotella_sp_AM42_24	1	-
lincosamide	Prevotella_sp_MGM2	1	-
lincosamide	Proteiniphilum_saccharofermentans	1	-
lincosamide	Proteus_mirabilis	1	-
lincosamide	Proteus_vulgaris	1	-
lincosamide	Providencia_alcalifaciens	1	-
lincosamide	Providencia_rettgeri	1	-
lincosamide	Pseudochrobactrum_asaccharolyticum	1	-
lincosamide	Pseudoflavonifractor_capillosus	1	-
lincosamide	Psychrobacter_cryohalolentis	1	-
lincosamide	Psychrobacter_pacificensis	1	-
lincosamide	Psychrobacter_pasteurii	1	-
lincosamide	Romboutsia_ilealis	1	-
lincosamide	Ruminococcaceae_bacterium_D16	1	-
lincosamide	Sellimonas_intestinalis	1	-
lincosamide	Serratia_marcescens	1	-
lincosamide	Shewanella_algae	1	-
lincosamide	Sphingobacterium_cellulitidis	1	-
lincosamide	Sphingobacterium_mizutaii	1	-
lincosamide	Sphingobacterium_paucimobilis	1	-
lincosamide	Staphylococcus_agnetis	1	-
lincosamide	Staphylococcus_aureus	1	-
lincosamide	Staphylococcus_chromogenes	1	-
lincosamide	Staphylococcus_condimenti	1	-
lincosamide	Staphylococcus_gallinarum	1	-
lincosamide	Staphylococcus_lentus	1	-
lincosamide	Staphylococcus_nepalensis	1	-
lincosamide	Staphylococcus_piscifermentans	1	-
lincosamide	Staphylococcus_xylosus	1	-
lincosamide	Streptococcus_ferus	1	-
lincosamide	Streptococcus_infantarius	1	-
lincosamide	Subdoligranulum_variabile	1	-
lincosamide	Turicimonas_muris	1	-
lincosamide	Vagococcus_lutrae	1	-
lincosamide	Weissella_hellenica	1	-
lincosamide	Weissella_jogaejeotgali	1	-
lincosamide	Weissella_paramesenteroides	1	-
lincosamide	Weissella_thailandensis	1	-
lincosamide	Wohlfahrtiimonas_chitiniclastica	1	-
lincosamide	Wohlfahrtiimonas_sp_G9077	1	-
MLSB	[Collinsella]_massiliensis	1	-
MLSB	Acholeplasma_brassicae	1	-
MLSB	Acholeplasma_laidlawii	1	-
MLSB	Acinetobacter_lwoffii	1	-
MLSB	Acinetobacter_radioresistens	1	-
MLSB	Acinetobacter_sp_WCHAc060041	1	-
MLSB	Acinetobacter_towneri	1	-
MLSB	Actinomycetaceae_bacterium_sk1b4	1	-
MLSB	Aequorivita_viscosa	1	-
MLSB	Aeromonas_caviae	1	-
MLSB	Aeromonas_media	1	-
MLSB	Alcaligenes_aquatilis	1	-
MLSB	Alcaligenes_faecalis	1	-
MLSB	Alistipes_finegoldii	1	-
MLSB	Alistipes_indistinctus	1	-
MLSB	Alistipes_inops	1	-
MLSB	Alistipes_onderdonkii	1	-
MLSB	Alistipes_sp_An66	1	-
MLSB	Anaerosphaera_aminiphila	1	-
MLSB	Aquamicrobium_aerolatum	1	-
MLSB	Arcobacter_porcinus	1	-
MLSB	Arcobacter_skirrowii	1	-
MLSB	Arcobacter_thereius	1	-
MLSB	Aspergillus_glaucus	1	-
MLSB	Atopostipes_suicloacalis	1	-
MLSB	Bacteroides_caccae	1	-
MLSB	Bacteroides_clarus	1	-
MLSB	Bacteroides_faecis	1	-
MLSB	Bacteroides_finegoldii	1	-
MLSB	Bacteroides_intestinalis	1	-
MLSB	Bacteroides_massiliensis	1	-
MLSB	Bacteroides_reticulotermitis	1	-
MLSB	Bacteroides_salyersiae	1	-
MLSB	Bacteroides_stercorirosoris	1	-
MLSB	Bacteroides_stercoris	1	-
MLSB	Bacteroides_vulgatus	1	-
MLSB	Bacteroides_xylanisolvens	1	-
MLSB	Barnesiella_intestinihominis	1	-
MLSB	Bavariicoccus_seileri	1	-
MLSB	Bifidobacterium_pseudocatenulatum	1	-
MLSB	Blautia_sp_An249	1	-
MLSB	Bordetella_trematum	1	-
MLSB	Brevibacterium_luteolum	1	-
MLSB	Brevundimonas_diminuta	1	-
MLSB	Butyricimonas_synergistica	1	-
MLSB	Butyricimonas_virosa	1	-
MLSB	Campylobacter_coli	1	-
MLSB	Candida_tropicalis	1	-
MLSB	Chryseobacterium_sp_VAUSW3	1	-
MLSB	Chryseobacterium_sp_YLOS41	1	-
MLSB	Citrobacter_braakii	1	-
MLSB	Citrobacter_portucalensis	1	-
MLSB	Citrobacter_sp_50677481	1	-
MLSB	Clostridium_baratii	1	-
MLSB	Clostridium_butyricum	1	-
MLSB	Clostridium_paraputrificum	1	-
MLSB	Clostridium_perfringens	1	-
MLSB	Clostridium_sp_7_2_43FAA	1	-
MLSB	Clostridium_sp_C105KSO13	1	-
MLSB	Corynebacterium_amycolatum	1	-
MLSB	Corynebacterium_casei	1	-
MLSB	Corynebacterium_deserti	1	-
MLSB	Corynebacterium_nuruki	1	-
MLSB	Corynebacterium_urealyticum	1	-
MLSB	Corynebacterium_variabile	1	-
MLSB	Cryptosporidium_meleagridis	1	-
MLSB	Cryptosporidium_parvum	1	-
MLSB	Desemzia_incerta	1	-
MLSB	Empedobacter_falsenii	1	-
MLSB	Enorma_massiliensis	1	-
MLSB	Enterobacter_mori	1	-
MLSB	Enterococcus_avium	1	-
MLSB	Enterococcus_cecorum	1	-
MLSB	Enterococcus_gallinarum	1	-
MLSB	Enterococcus_saccharolyticus	1	-
MLSB	Erysipelothrix_larvae	1	-
MLSB	Erysipelotrichaceae_bacterium_MTC7	1	-
MLSB	Escherichia_coli	1	-
MLSB	Escherichia_fergusonii	1	-
MLSB	Eubacterium_aggregans	1	-
MLSB	Eubacterium_limosum	1	-
MLSB	Eubacterium_sp_CAG_180	1	-
MLSB	Faecalibacterium_prausnitzii	1	-
MLSB	Falsochrobactrum_sp_HN4	1	-
MLSB	Fermentimonas_caenicola	1	-
MLSB	Flavobacteriaceae_bacterium_UR159	1	-
MLSB	Flavonifractor_sp_An10	1	-
MLSB	Fusobacterium_ulcerans	1	-
MLSB	Galbibacter_marinus	1	-
MLSB	Gemella_asaccharolytica	1	-
MLSB	Globicatella_sanguinis	1	-
MLSB	Globicatella_sulfidifaciens	1	-
MLSB	Glutamicibacter_mysorens	1	-
MLSB	Gordonibacter_pamelaeae	1	-
MLSB	Halomonas_campaniensis	1	-
MLSB	Helicobacter_pullorum	1	-
MLSB	Ignatzschineria_cameli	1	-
MLSB	Ignatzschineria_indica	1	-
MLSB	Jeotgalibaca_sp_PTS2502	1	-
MLSB	Klebsiella_pneumoniae	1	-
MLSB	Klebsiella_quasipneumoniae	1	-
MLSB	Klebsiella_variicola	1	-
MLSB	Kurthia_zopfii	1	-
MLSB	Lachnoclostridium_sp_An118	1	-
MLSB	Lachnoclostridium_sp_An14	1	-
MLSB	Lachnoclostridium_sp_An169	1	-
MLSB	Lachnoclostridium_sp_An298	1	-
MLSB	Lachnoclostridium_sp_An76	1	-
MLSB	Lactobacillus_acidipiscis	1	-
MLSB	Lactobacillus_aviarius	1	-
MLSB	Lactobacillus_curvatus	1	-
MLSB	Lactobacillus_futsaii	1	-
MLSB	Lactobacillus_gallinarum	1	-
MLSB	Lactobacillus_intestinalis	1	-
MLSB	Lactobacillus_murinus	1	-
MLSB	Lactobacillus_odoratitofui	1	-
MLSB	Lactobacillus_panis	1	-
MLSB	Lactobacillus_paralimentarius	1	-
MLSB	Lactobacillus_tucceti	1	-
MLSB	Lactobacillus_vaccinostercus	1	-
MLSB	Lactococcus_lactis	1	-
MLSB	Leuconostoc_citreum	1	-
MLSB	Lysinibacillus_sp_BF_4	1	-
MLSB	Lysobacter_defluvii	1	-
MLSB	Massiliomicrobiota_timonensis	1	-
MLSB	Micrococcus_terreus	1	-
MLSB	Mobilicoccus_pelagius	1	-
MLSB	Mycoplasma_yeatsii	1	-
MLSB	Myroides_odoratimimus	1	-
MLSB	Oenococcus_alcoholitolerans	1	-
MLSB	Oligella_ureolytica	1	-
MLSB	Paenalcaligenes_hominis	1	-
MLSB	Parabacteroides_distasonis	1	-
MLSB	Parabacteroides_merdae	1	-
MLSB	Paraclostridium_benzoelyticum	1	-
MLSB	Paracoccus_alcaliphilus	1	-
MLSB	Paracoccus_alkenifer	1	-
MLSB	Paracoccus_solventivorans	1	-
MLSB	Paracoccus_sp_CBA4604	1	-
MLSB	Pediococcus_stilesii	1	-
MLSB	Pelagibacterium_sp_XYN52	1	-
MLSB	Peptoniphilus_harei	1	-
MLSB	Peptoniphilus_sp_ING2_D1G	1	-
MLSB	Petrimonas_mucosa	1	-
MLSB	Pisciglobus_halotolerans	1	-
MLSB	Pontibaca_methylaminivorans	1	-
MLSB	Prevotella_sp_AM42_24	1	-
MLSB	Prevotella_sp_MGM2	1	-
MLSB	Proteiniphilum_saccharofermentans	1	-
MLSB	Proteus_hauseri	1	-
MLSB	Proteus_mirabilis	1	-
MLSB	Proteus_vulgaris	1	-
MLSB	Providencia_alcalifaciens	1	-
MLSB	Providencia_rettgeri	1	-
MLSB	Pseudochrobactrum_asaccharolyticum	1	-
MLSB	Pseudoflavonifractor_capillosus	1	-
MLSB	Psychrobacter_cryohalolentis	1	-
MLSB	Psychrobacter_pacificensis	1	-
MLSB	Psychrobacter_pasteurii	1	-
MLSB	Romboutsia_ilealis	1	-
MLSB	Ruminococcaceae_bacterium_D16	1	-
MLSB	Sellimonas_intestinalis	1	-
MLSB	Serratia_marcescens	1	-
MLSB	Shewanella_algae	1	-
MLSB	Sphingobacterium_cellulitidis	1	-
MLSB	Sphingobacterium_mizutaii	1	-
MLSB	Sphingobacterium_paucimobilis	1	-
MLSB	Staphylococcus_agnetis	1	-
MLSB	Staphylococcus_aureus	1	-
MLSB	Staphylococcus_chromogenes	1	-
MLSB	Staphylococcus_condimenti	1	-
MLSB	Staphylococcus_gallinarum	1	-
MLSB	Staphylococcus_lentus	1	-
MLSB	Staphylococcus_nepalensis	1	-
MLSB	Staphylococcus_piscifermentans	1	-
MLSB	Staphylococcus_xylosus	1	-
MLSB	Streptococcus_ferus	1	-
MLSB	Streptococcus_infantarius	1	-
MLSB	Subdoligranulum_variabile	1	-
MLSB	Turicimonas_muris	1	-
MLSB	Vagococcus_lutrae	1	-
MLSB	Weissella_hellenica	1	-
MLSB	Weissella_paramesenteroides	1	-
MLSB	Wohlfahrtiimonas_chitiniclastica	1	-
MLSB	Wohlfahrtiimonas_sp_G9077	1	-
tetracycline	[Collinsella]_massiliensis	1	-
tetracycline	Acholeplasma_brassicae	1	-
tetracycline	Acholeplasma_laidlawii	1	-
tetracycline	Acinetobacter_lwoffii	1	-
tetracycline	Acinetobacter_radioresistens	1	-
tetracycline	Acinetobacter_sp_WCHAc060041	1	-
tetracycline	Acinetobacter_towneri	1	-
tetracycline	Actinomycetaceae_bacterium_sk1b4	1	-
tetracycline	Aequorivita_viscosa	1	-
tetracycline	Aeromonas_caviae	1	-
tetracycline	Aeromonas_media	1	-
tetracycline	Alcaligenes_aquatilis	1	-
tetracycline	Alistipes_finegoldii	1	-
tetracycline	Alistipes_indistinctus	1	-
tetracycline	Alistipes_inops	1	-
tetracycline	Alistipes_onderdonkii	1	-
tetracycline	Anaerosphaera_aminiphila	1	-
tetracycline	Aquamicrobium_aerolatum	1	-
tetracycline	Arcobacter_porcinus	1	-
tetracycline	Arcobacter_skirrowii	1	-
tetracycline	Arcobacter_thereius	1	-
tetracycline	Aspergillus_glaucus	1	-
tetracycline	Atopostipes_suicloacalis	1	-
tetracycline	Bacillus_cereus_group	1	-
tetracycline	Bacteroides_caccae	1	-
tetracycline	Bacteroides_clarus	1	-
tetracycline	Bacteroides_faecis	1	-
tetracycline	Bacteroides_finegoldii	1	-
tetracycline	Bacteroides_intestinalis	1	-
tetracycline	Bacteroides_massiliensis	1	-
tetracycline	Bacteroides_reticulotermitis	1	-
tetracycline	Bacteroides_salyersiae	1	-
tetracycline	Bacteroides_stercorirosoris	1	-
tetracycline	Bacteroides_stercoris	1	-
tetracycline	Bacteroides_vulgatus	1	-
tetracycline	Bacteroides_xylanisolvens	1	-
tetracycline	Barnesiella_intestinihominis	1	-
tetracycline	Bavariicoccus_seileri	1	-
tetracycline	Bifidobacterium_pseudocatenulatum	1	-
tetracycline	Blautia_sp_An249	1	-
tetracycline	Bordetella_trematum	1	-
tetracycline	Brevibacterium_luteolum	1	-
tetracycline	Brevundimonas_diminuta	1	-
tetracycline	Butyricimonas_synergistica	1	-
tetracycline	Butyricimonas_virosa	1	-
tetracycline	Campylobacter_coli	1	-
tetracycline	Candida_tropicalis	1	-
tetracycline	Chryseobacterium_sp_VAUSW3	1	-
tetracycline	Chryseobacterium_sp_YLOS41	1	-
tetracycline	Citrobacter_braakii	1	-
tetracycline	Citrobacter_portucalensis	1	-
tetracycline	Citrobacter_sp_50677481	1	-
tetracycline	Clostridium_baratii	1	-
tetracycline	Clostridium_butyricum	1	-
tetracycline	Clostridium_paraputrificum	1	-
tetracycline	Clostridium_perfringens	1	-
tetracycline	Clostridium_sp_7_2_43FAA	1	-
tetracycline	Clostridium_sp_C105KSO13	1	-
tetracycline	Corynebacterium_amycolatum	1	-
tetracycline	Corynebacterium_casei	1	-
tetracycline	Corynebacterium_deserti	1	-
tetracycline	Corynebacterium_nuruki	1	-
tetracycline	Corynebacterium_urealyticum	1	-
tetracycline	Corynebacterium_variabile	1	-
tetracycline	Cryptosporidium_meleagridis	1	-
tetracycline	Cryptosporidium_parvum	1	-
tetracycline	Desemzia_incerta	1	-
tetracycline	Empedobacter_falsenii	1	-
tetracycline	Enorma_massiliensis	1	-
tetracycline	Enterobacter_mori	1	-
tetracycline	Enterococcus_avium	1	-
tetracycline	Enterococcus_cecorum	1	-
tetracycline	Enterococcus_gallinarum	1	-
tetracycline	Enterococcus_saccharolyticus	1	-
tetracycline	Erysipelotrichaceae_bacterium_MTC7	1	-
tetracycline	Escherichia_coli	1	-
tetracycline	Escherichia_fergusonii	1	-
tetracycline	Eubacterium_aggregans	1	-
tetracycline	Eubacterium_limosum	1	-
tetracycline	Eubacterium_sp_CAG_180	1	-
tetracycline	Faecalibacterium_prausnitzii	1	-
tetracycline	Falsochrobactrum_sp_HN4	1	-
tetracycline	Fermentimonas_caenicola	1	-
tetracycline	Flavobacteriaceae_bacterium_UR159	1	-
tetracycline	Flavonifractor_sp_An10	1	-
tetracycline	Fusobacterium_ulcerans	1	-
tetracycline	Galbibacter_marinus	1	-
tetracycline	Glutamicibacter_mysorens	1	-
tetracycline	Gordonibacter_pamelaeae	1	-
tetracycline	Halomonas_campaniensis	1	-
tetracycline	Helicobacter_pullorum	1	-
tetracycline	Ignatzschineria_cameli	1	-
tetracycline	Ignatzschineria_indica	1	-
tetracycline	Klebsiella_pneumoniae	1	-
tetracycline	Klebsiella_quasipneumoniae	1	-
tetracycline	Klebsiella_variicola	1	-
tetracycline	Kurthia_zopfii	1	-
tetracycline	Lachnoclostridium_sp_An118	1	-
tetracycline	Lachnoclostridium_sp_An14	1	-
tetracycline	Lachnoclostridium_sp_An169	1	-
tetracycline	Lachnoclostridium_sp_An298	1	-
tetracycline	Lachnoclostridium_sp_An76	1	-
tetracycline	Lactobacillus_acidipiscis	1	-
tetracycline	Lactobacillus_aviarius	1	-
tetracycline	Lactobacillus_brevis	1	-
tetracycline	Lactobacillus_crispatus	1	-
tetracycline	Lactobacillus_curvatus	1	-
tetracycline	Lactobacillus_futsaii	1	-
tetracycline	Lactobacillus_gallinarum	1	-
tetracycline	Lactobacillus_intestinalis	1	-
tetracycline	Lactobacillus_murinus	1	-
tetracycline	Lactobacillus_odoratitofui	1	-
tetracycline	Lactobacillus_panis	1	-
tetracycline	Lactobacillus_paralimentarius	1	-
tetracycline	Lactobacillus_tucceti	1	-
tetracycline	Lactobacillus_vaccinostercus	1	-
tetracycline	Lactococcus_lactis	1	-
tetracycline	Leuconostoc_citreum	1	-
tetracycline	Lysobacter_defluvii	1	-
tetracycline	Massiliomicrobiota_timonensis	1	-
tetracycline	Micrococcus_terreus	1	-
tetracycline	Mobilicoccus_pelagius	1	-
tetracycline	Mycoplasma_yeatsii	1	-
tetracycline	Oenococcus_alcoholitolerans	1	-
tetracycline	Parabacteroides_distasonis	1	-
tetracycline	Parabacteroides_merdae	1	-
tetracycline	Paraclostridium_benzoelyticum	1	-
tetracycline	Paracoccus_alcaliphilus	1	-
tetracycline	Paracoccus_alkenifer	1	-
tetracycline	Paracoccus_solventivorans	1	-
tetracycline	Paracoccus_sp_CBA4604	1	-
tetracycline	Pediococcus_pentosaceus	1	-
tetracycline	Pediococcus_stilesii	1	-
tetracycline	Pelagibacterium_sp_XYN52	1	-
tetracycline	Peptoniphilus_harei	1	-
tetracycline	Peptoniphilus_sp_ING2_D1G	1	-
tetracycline	Petrimonas_mucosa	1	-
tetracycline	Pisciglobus_halotolerans	1	-
tetracycline	Pontibaca_methylaminivorans	1	-
tetracycline	Prevotella_sp_AM42_24	1	-
tetracycline	Prevotella_sp_MGM2	1	-
tetracycline	Proteiniphilum_saccharofermentans	1	-
tetracycline	Providencia_alcalifaciens	1	-
tetracycline	Pseudochrobactrum_asaccharolyticum	1	-
tetracycline	Pseudoflavonifractor_capillosus	1	-
tetracycline	Psychrobacter_cryohalolentis	1	-
tetracycline	Psychrobacter_pacificensis	1	-
tetracycline	Psychrobacter_pasteurii	1	-
tetracycline	Romboutsia_ilealis	1	-
tetracycline	Ruminococcaceae_bacterium_D16	1	-
tetracycline	Sellimonas_intestinalis	1	-
tetracycline	Serratia_marcescens	1	-
tetracycline	Shewanella_algae	1	-
tetracycline	Sphingobacterium_cellulitidis	1	-
tetracycline	Sphingobacterium_mizutaii	1	-
tetracycline	Sphingobacterium_paucimobilis	1	-
tetracycline	Staphylococcus_agnetis	1	-
tetracycline	Staphylococcus_aureus	1	-
tetracycline	Staphylococcus_chromogenes	1	-
tetracycline	Staphylococcus_condimenti	1	-
tetracycline	Staphylococcus_gallinarum	1	-
tetracycline	Staphylococcus_lentus	1	-
tetracycline	Staphylococcus_nepalensis	1	-
tetracycline	Staphylococcus_piscifermentans	1	-
tetracycline	Staphylococcus_xylosus	1	-
tetracycline	Streptococcus_ferus	1	-
tetracycline	Streptococcus_infantarius	1	-
tetracycline	Subdoligranulum_variabile	1	-
tetracycline	Turicimonas_muris	1	-
tetracycline	Vagococcus_lutrae	1	-
tetracycline	Weissella_hellenica	1	-
tetracycline	Wohlfahrtiimonas_sp_G9077	1	-
