# Supplementary material for: Machine learning and metagenomics enhance surveillance of antimicrobial resistance in chicken production in China
Source: Research Square preprint supplement (doi:10.21203/rs.3.rs-2458989/v1), 2023-01-13
Supplement: Supplementary file 9 [file e016980c460ffe4b1102140f.xlsx]

## Sheet: Place
Antibiotic	Source 1	Source 2	holm pvalue	Relation
fosfomycin	henan 2	shandong 4	0.130211	-
fosfomycin	henan 2	liaoning 1	0.285312	-
beta lactam	henan 3	shandong 2	0.307104	-
nucleoside	shandong 1_1	shandong 2	0.327387	-
phenicol	liaoning 1	shandong 1_1	0.508549	-
phenicol	shandong 1_1	shandong 4	0.596761	-
beta lactam	henan 2	shandong 2	0.648435	-
beta lactam	shandong 2	shandong 3	0.693543	-
MDR	henan 1	shandong 4	0.803137	-
peptide	henan 1	shandong 4	0.848875	-
peptide	henan 1	liaoning 3	0.901361	-
MDR	henan 1	henan 1	1	-
MDR	henan 1	henan 2	1	-
MDR	henan 1	henan 3	1	-
MDR	henan 1	liaoning 1	1	-
MDR	henan 1	liaoning 2	1	-
MDR	henan 1	liaoning 3	1	-
MDR	henan 1	shandong 1_1	1	-
MDR	henan 1	shandong 1_2	1	-
MDR	henan 1	shandong 2	1	-
MDR	henan 1	shandong 3	1	-
MDR	henan 2	henan 2	1	-
MDR	henan 2	henan 3	1	-
MDR	henan 2	liaoning 1	1	-
MDR	henan 2	liaoning 2	1	-
MDR	henan 2	liaoning 3	1	-
MDR	henan 2	shandong 1_1	1	-
MDR	henan 2	shandong 1_2	1	-
MDR	henan 2	shandong 2	1	-
MDR	henan 2	shandong 3	1	-
MDR	henan 2	shandong 4	1	-
MDR	henan 3	henan 3	1	-
MDR	henan 3	liaoning 1	1	-
MDR	henan 3	liaoning 2	1	-
MDR	henan 3	liaoning 3	1	-
MDR	henan 3	shandong 1_1	1	-
MDR	henan 3	shandong 1_2	1	-
MDR	henan 3	shandong 2	1	-
MDR	henan 3	shandong 3	1	-
MDR	henan 3	shandong 4	1	-
MDR	liaoning 1	liaoning 1	1	-
MDR	liaoning 1	liaoning 2	1	-
MDR	liaoning 1	liaoning 3	1	-
MDR	liaoning 1	shandong 1_1	1	-
MDR	liaoning 1	shandong 1_2	1	-
MDR	liaoning 1	shandong 2	1	-
MDR	liaoning 1	shandong 3	1	-
MDR	liaoning 1	shandong 4	1	-
MDR	liaoning 2	liaoning 2	1	-
MDR	liaoning 2	liaoning 3	1	-
MDR	liaoning 2	shandong 1_1	1	-
MDR	liaoning 2	shandong 1_2	1	-
MDR	liaoning 2	shandong 2	1	-
MDR	liaoning 2	shandong 3	1	-
MDR	liaoning 2	shandong 4	1	-
MDR	liaoning 3	liaoning 3	1	-
MDR	liaoning 3	shandong 1_1	1	-
MDR	liaoning 3	shandong 1_2	1	-
MDR	liaoning 3	shandong 2	1	-
MDR	liaoning 3	shandong 3	1	-
MDR	liaoning 3	shandong 4	1	-
MDR	shandong 1_1	shandong 1_1	1	-
MDR	shandong 1_1	shandong 1_2	1	-
MDR	shandong 1_1	shandong 2	1	-
MDR	shandong 1_1	shandong 3	1	-
MDR	shandong 1_1	shandong 4	1	-
MDR	shandong 1_2	shandong 1_2	1	-
MDR	shandong 1_2	shandong 2	1	-
MDR	shandong 1_2	shandong 3	1	-
MDR	shandong 1_2	shandong 4	1	-
MDR	shandong 2	shandong 2	1	-
MDR	shandong 2	shandong 3	1	-
MDR	shandong 2	shandong 4	1	-
MDR	shandong 3	shandong 3	1	-
MDR	shandong 3	shandong 4	1	-
MDR	shandong 4	shandong 4	1	-
MLSB	henan 1	henan 1	1	-
MLSB	henan 1	henan 2	1	-
MLSB	henan 1	henan 3	1	-
MLSB	henan 1	liaoning 1	1	-
MLSB	henan 1	liaoning 2	1	-
MLSB	henan 1	liaoning 3	1	-
MLSB	henan 1	shandong 1_1	1	-
MLSB	henan 1	shandong 1_2	1	-
MLSB	henan 1	shandong 2	1	-
MLSB	henan 1	shandong 3	1	-
MLSB	henan 1	shandong 4	1	-
MLSB	henan 2	henan 2	1	-
MLSB	henan 2	henan 3	1	-
MLSB	henan 2	liaoning 1	1	-
MLSB	henan 2	liaoning 2	1	-
MLSB	henan 2	liaoning 3	1	-
MLSB	henan 2	shandong 1_1	1	-
MLSB	henan 2	shandong 1_2	1	-
MLSB	henan 2	shandong 2	1	-
MLSB	henan 2	shandong 3	1	-
MLSB	henan 2	shandong 4	1	-
MLSB	henan 3	henan 3	1	-
MLSB	henan 3	liaoning 1	1	-
MLSB	henan 3	liaoning 2	1	-
MLSB	henan 3	liaoning 3	1	-
MLSB	henan 3	shandong 1_1	1	-
MLSB	henan 3	shandong 1_2	1	-
MLSB	henan 3	shandong 2	1	-
MLSB	henan 3	shandong 3	1	-
MLSB	henan 3	shandong 4	1	-
MLSB	liaoning 1	liaoning 1	1	-
MLSB	liaoning 1	liaoning 2	1	-
MLSB	liaoning 1	liaoning 3	1	-
MLSB	liaoning 1	shandong 1_1	1	-
MLSB	liaoning 1	shandong 1_2	1	-
MLSB	liaoning 1	shandong 2	1	-
MLSB	liaoning 1	shandong 3	1	-
MLSB	liaoning 1	shandong 4	1	-
MLSB	liaoning 2	liaoning 2	1	-
MLSB	liaoning 2	liaoning 3	1	-
MLSB	liaoning 2	shandong 1_1	1	-
MLSB	liaoning 2	shandong 1_2	1	-
MLSB	liaoning 2	shandong 2	1	-
MLSB	liaoning 2	shandong 3	1	-
MLSB	liaoning 2	shandong 4	1	-
MLSB	liaoning 3	liaoning 3	1	-
MLSB	liaoning 3	shandong 1_1	1	-
MLSB	liaoning 3	shandong 1_2	1	-
MLSB	liaoning 3	shandong 2	1	-
MLSB	liaoning 3	shandong 3	1	-
MLSB	liaoning 3	shandong 4	1	-
MLSB	shandong 1_1	shandong 1_1	1	-
MLSB	shandong 1_1	shandong 1_2	1	-
MLSB	shandong 1_1	shandong 2	1	-
MLSB	shandong 1_1	shandong 3	1	-
MLSB	shandong 1_1	shandong 4	1	-
MLSB	shandong 1_2	shandong 1_2	1	-
MLSB	shandong 1_2	shandong 2	1	-
MLSB	shandong 1_2	shandong 3	1	-
MLSB	shandong 1_2	shandong 4	1	-
MLSB	shandong 2	shandong 2	1	-
MLSB	shandong 2	shandong 3	1	-
MLSB	shandong 2	shandong 4	1	-
MLSB	shandong 3	shandong 3	1	-
MLSB	shandong 3	shandong 4	1	-
MLSB	shandong 4	shandong 4	1	-
aminoglycoside	henan 1	henan 1	1	-
aminoglycoside	henan 1	henan 2	1	-
aminoglycoside	henan 1	henan 3	1	-
aminoglycoside	henan 1	liaoning 1	1	-
aminoglycoside	henan 1	liaoning 2	1	-
aminoglycoside	henan 1	liaoning 3	1	-
aminoglycoside	henan 1	shandong 1_1	1	-
aminoglycoside	henan 1	shandong 1_2	1	-
aminoglycoside	henan 1	shandong 2	1	-
aminoglycoside	henan 1	shandong 3	1	-
aminoglycoside	henan 1	shandong 4	1	-
aminoglycoside	henan 2	henan 2	1	-
aminoglycoside	henan 2	henan 3	1	-
aminoglycoside	henan 2	liaoning 1	1	-
aminoglycoside	henan 2	liaoning 2	1	-
aminoglycoside	henan 2	liaoning 3	1	-
aminoglycoside	henan 2	shandong 1_1	1	-
aminoglycoside	henan 2	shandong 1_2	1	-
aminoglycoside	henan 2	shandong 2	1	-
aminoglycoside	henan 2	shandong 3	1	-
aminoglycoside	henan 2	shandong 4	1	-
aminoglycoside	henan 3	henan 3	1	-
aminoglycoside	henan 3	liaoning 1	1	-
aminoglycoside	henan 3	liaoning 2	1	-
aminoglycoside	henan 3	liaoning 3	1	-
aminoglycoside	henan 3	shandong 1_1	1	-
aminoglycoside	henan 3	shandong 1_2	1	-
aminoglycoside	henan 3	shandong 2	1	-
aminoglycoside	henan 3	shandong 3	1	-
aminoglycoside	henan 3	shandong 4	1	-
aminoglycoside	liaoning 1	liaoning 1	1	-
aminoglycoside	liaoning 1	liaoning 2	1	-
aminoglycoside	liaoning 1	liaoning 3	1	-
aminoglycoside	liaoning 1	shandong 1_1	1	-
aminoglycoside	liaoning 1	shandong 1_2	1	-
aminoglycoside	liaoning 1	shandong 2	1	-
aminoglycoside	liaoning 1	shandong 3	1	-
aminoglycoside	liaoning 1	shandong 4	1	-
aminoglycoside	liaoning 2	liaoning 2	1	-
aminoglycoside	liaoning 2	liaoning 3	1	-
aminoglycoside	liaoning 2	shandong 1_1	1	-
aminoglycoside	liaoning 2	shandong 1_2	1	-
aminoglycoside	liaoning 2	shandong 2	1	-
aminoglycoside	liaoning 2	shandong 3	1	-
aminoglycoside	liaoning 2	shandong 4	1	-
aminoglycoside	liaoning 3	liaoning 3	1	-
aminoglycoside	liaoning 3	shandong 1_1	1	-
aminoglycoside	liaoning 3	shandong 1_2	1	-
aminoglycoside	liaoning 3	shandong 2	1	-
aminoglycoside	liaoning 3	shandong 3	1	-
aminoglycoside	liaoning 3	shandong 4	1	-
aminoglycoside	shandong 1_1	shandong 1_1	1	-
aminoglycoside	shandong 1_1	shandong 1_2	1	-
aminoglycoside	shandong 1_1	shandong 2	1	-
aminoglycoside	shandong 1_1	shandong 3	1	-
aminoglycoside	shandong 1_1	shandong 4	1	-
aminoglycoside	shandong 1_2	shandong 1_2	1	-
aminoglycoside	shandong 1_2	shandong 2	1	-
aminoglycoside	shandong 1_2	shandong 3	1	-
aminoglycoside	shandong 1_2	shandong 4	1	-
aminoglycoside	shandong 2	shandong 2	1	-
aminoglycoside	shandong 2	shandong 3	1	-
aminoglycoside	shandong 2	shandong 4	1	-
aminoglycoside	shandong 3	shandong 3	1	-
aminoglycoside	shandong 3	shandong 4	1	-
aminoglycoside	shandong 4	shandong 4	1	-
beta lactam	henan 1	henan 1	1	-
beta lactam	henan 1	henan 2	1	-
beta lactam	henan 1	henan 3	1	-
beta lactam	henan 1	liaoning 1	1	-
beta lactam	henan 1	liaoning 2	1	-
beta lactam	henan 1	liaoning 3	1	-
beta lactam	henan 1	shandong 1_1	1	-
beta lactam	henan 1	shandong 1_2	1	-
beta lactam	henan 1	shandong 2	1	-
beta lactam	henan 1	shandong 3	1	-
beta lactam	henan 1	shandong 4	1	-
beta lactam	henan 2	henan 2	1	-
beta lactam	henan 2	henan 3	1	-
beta lactam	henan 2	liaoning 1	1	-
beta lactam	henan 2	liaoning 2	1	-
beta lactam	henan 2	liaoning 3	1	-
beta lactam	henan 2	shandong 1_1	1	-
beta lactam	henan 2	shandong 1_2	1	-
beta lactam	henan 2	shandong 3	1	-
beta lactam	henan 2	shandong 4	1	-
beta lactam	henan 3	henan 3	1	-
beta lactam	henan 3	liaoning 1	1	-
beta lactam	henan 3	liaoning 2	1	-
beta lactam	henan 3	liaoning 3	1	-
beta lactam	henan 3	shandong 1_1	1	-
beta lactam	henan 3	shandong 1_2	1	-
beta lactam	henan 3	shandong 3	1	-
beta lactam	henan 3	shandong 4	1	-
beta lactam	liaoning 1	liaoning 1	1	-
beta lactam	liaoning 1	liaoning 2	1	-
beta lactam	liaoning 1	liaoning 3	1	-
beta lactam	liaoning 1	shandong 1_1	1	-
beta lactam	liaoning 1	shandong 1_2	1	-
beta lactam	liaoning 1	shandong 2	1	-
beta lactam	liaoning 1	shandong 3	1	-
beta lactam	liaoning 1	shandong 4	1	-
beta lactam	liaoning 2	liaoning 2	1	-
beta lactam	liaoning 2	liaoning 3	1	-
beta lactam	liaoning 2	shandong 1_1	1	-
beta lactam	liaoning 2	shandong 1_2	1	-
beta lactam	liaoning 2	shandong 2	1	-
beta lactam	liaoning 2	shandong 3	1	-
beta lactam	liaoning 2	shandong 4	1	-
beta lactam	liaoning 3	liaoning 3	1	-
beta lactam	liaoning 3	shandong 1_1	1	-
beta lactam	liaoning 3	shandong 1_2	1	-
beta lactam	liaoning 3	shandong 2	1	-
beta lactam	liaoning 3	shandong 3	1	-
beta lactam	liaoning 3	shandong 4	1	-
beta lactam	shandong 1_1	shandong 1_1	1	-
beta lactam	shandong 1_1	shandong 1_2	1	-
beta lactam	shandong 1_1	shandong 2	1	-
beta lactam	shandong 1_1	shandong 3	1	-
beta lactam	shandong 1_1	shandong 4	1	-
beta lactam	shandong 1_2	shandong 1_2	1	-
beta lactam	shandong 1_2	shandong 2	1	-
beta lactam	shandong 1_2	shandong 3	1	-
beta lactam	shandong 1_2	shandong 4	1	-
beta lactam	shandong 2	shandong 2	1	-
beta lactam	shandong 2	shandong 4	1	-
beta lactam	shandong 3	shandong 3	1	-
beta lactam	shandong 3	shandong 4	1	-
beta lactam	shandong 4	shandong 4	1	-
fluoroquinolone	henan 1	henan 1	1	-
fluoroquinolone	henan 1	henan 2	1	-
fluoroquinolone	henan 1	henan 3	1	-
fluoroquinolone	henan 1	liaoning 1	1	-
fluoroquinolone	henan 1	liaoning 2	1	-
fluoroquinolone	henan 1	liaoning 3	1	-
fluoroquinolone	henan 1	shandong 1_1	1	-
fluoroquinolone	henan 1	shandong 1_2	1	-
fluoroquinolone	henan 1	shandong 2	1	-
fluoroquinolone	henan 1	shandong 3	1	-
fluoroquinolone	henan 1	shandong 4	1	-
fluoroquinolone	henan 2	henan 2	1	-
fluoroquinolone	henan 2	henan 3	1	-
fluoroquinolone	henan 2	liaoning 1	1	-
fluoroquinolone	henan 2	liaoning 2	1	-
fluoroquinolone	henan 2	liaoning 3	1	-
fluoroquinolone	henan 2	shandong 1_1	1	-
fluoroquinolone	henan 2	shandong 1_2	1	-
fluoroquinolone	henan 2	shandong 2	1	-
fluoroquinolone	henan 2	shandong 3	1	-
fluoroquinolone	henan 2	shandong 4	1	-
fluoroquinolone	henan 3	henan 3	1	-
fluoroquinolone	henan 3	liaoning 1	1	-
fluoroquinolone	henan 3	liaoning 2	1	-
fluoroquinolone	henan 3	liaoning 3	1	-
fluoroquinolone	henan 3	shandong 1_1	1	-
fluoroquinolone	henan 3	shandong 1_2	1	-
fluoroquinolone	henan 3	shandong 2	1	-
fluoroquinolone	henan 3	shandong 3	1	-
fluoroquinolone	henan 3	shandong 4	1	-
fluoroquinolone	liaoning 1	liaoning 1	1	-
fluoroquinolone	liaoning 1	liaoning 2	1	-
fluoroquinolone	liaoning 1	liaoning 3	1	-
fluoroquinolone	liaoning 1	shandong 1_1	1	-
fluoroquinolone	liaoning 1	shandong 1_2	1	-
fluoroquinolone	liaoning 1	shandong 2	1	-
fluoroquinolone	liaoning 1	shandong 3	1	-
fluoroquinolone	liaoning 1	shandong 4	1	-
fluoroquinolone	liaoning 2	liaoning 2	1	-
fluoroquinolone	liaoning 2	liaoning 3	1	-
fluoroquinolone	liaoning 2	shandong 1_1	1	-
fluoroquinolone	liaoning 2	shandong 1_2	1	-
fluoroquinolone	liaoning 2	shandong 2	1	-
fluoroquinolone	liaoning 2	shandong 3	1	-
fluoroquinolone	liaoning 2	shandong 4	1	-
fluoroquinolone	liaoning 3	liaoning 3	1	-
fluoroquinolone	liaoning 3	shandong 1_1	1	-
fluoroquinolone	liaoning 3	shandong 1_2	1	-
fluoroquinolone	liaoning 3	shandong 2	1	-
fluoroquinolone	liaoning 3	shandong 3	1	-
fluoroquinolone	liaoning 3	shandong 4	1	-
fluoroquinolone	shandong 1_1	shandong 1_1	1	-
fluoroquinolone	shandong 1_1	shandong 1_2	1	-
fluoroquinolone	shandong 1_1	shandong 2	1	-
fluoroquinolone	shandong 1_1	shandong 3	1	-
fluoroquinolone	shandong 1_1	shandong 4	1	-
fluoroquinolone	shandong 1_2	shandong 1_2	1	-
fluoroquinolone	shandong 1_2	shandong 2	1	-
fluoroquinolone	shandong 1_2	shandong 3	1	-
fluoroquinolone	shandong 1_2	shandong 4	1	-
fluoroquinolone	shandong 2	shandong 2	1	-
fluoroquinolone	shandong 2	shandong 3	1	-
fluoroquinolone	shandong 2	shandong 4	1	-
fluoroquinolone	shandong 3	shandong 3	1	-
fluoroquinolone	shandong 3	shandong 4	1	-
fluoroquinolone	shandong 4	shandong 4	1	-
fosfomycin	henan 1	henan 1	1	-
fosfomycin	henan 1	henan 2	1	-
fosfomycin	henan 1	henan 3	1	-
fosfomycin	henan 1	liaoning 1	1	-
fosfomycin	henan 1	liaoning 2	1	-
fosfomycin	henan 1	liaoning 3	1	-
fosfomycin	henan 1	shandong 1_1	1	-
fosfomycin	henan 1	shandong 1_2	1	-
fosfomycin	henan 1	shandong 2	1	-
fosfomycin	henan 1	shandong 3	1	-
fosfomycin	henan 1	shandong 4	1	-
fosfomycin	henan 2	henan 2	1	-
fosfomycin	henan 2	henan 3	1	-
fosfomycin	henan 2	liaoning 2	1	-
fosfomycin	henan 2	liaoning 3	1	-
fosfomycin	henan 2	shandong 1_1	1	-
fosfomycin	henan 2	shandong 1_2	1	-
fosfomycin	henan 2	shandong 2	1	-
fosfomycin	henan 2	shandong 3	1	-
fosfomycin	henan 3	henan 3	1	-
fosfomycin	henan 3	liaoning 1	1	-
fosfomycin	henan 3	liaoning 2	1	-
fosfomycin	henan 3	liaoning 3	1	-
fosfomycin	henan 3	shandong 1_1	1	-
fosfomycin	henan 3	shandong 1_2	1	-
fosfomycin	henan 3	shandong 2	1	-
fosfomycin	henan 3	shandong 3	1	-
fosfomycin	henan 3	shandong 4	1	-
fosfomycin	liaoning 1	liaoning 1	1	-
fosfomycin	liaoning 1	liaoning 2	1	-
fosfomycin	liaoning 1	liaoning 3	1	-
fosfomycin	liaoning 1	shandong 1_1	1	-
fosfomycin	liaoning 1	shandong 1_2	1	-
fosfomycin	liaoning 1	shandong 2	1	-
fosfomycin	liaoning 1	shandong 3	1	-
fosfomycin	liaoning 1	shandong 4	1	-
fosfomycin	liaoning 2	liaoning 2	1	-
fosfomycin	liaoning 2	liaoning 3	1	-
fosfomycin	liaoning 2	shandong 1_1	1	-
fosfomycin	liaoning 2	shandong 1_2	1	-
fosfomycin	liaoning 2	shandong 2	1	-
fosfomycin	liaoning 2	shandong 3	1	-
fosfomycin	liaoning 2	shandong 4	1	-
fosfomycin	liaoning 3	liaoning 3	1	-
fosfomycin	liaoning 3	shandong 1_1	1	-
fosfomycin	liaoning 3	shandong 1_2	1	-
fosfomycin	liaoning 3	shandong 2	1	-
fosfomycin	liaoning 3	shandong 3	1	-
fosfomycin	liaoning 3	shandong 4	1	-
fosfomycin	shandong 1_1	shandong 1_1	1	-
fosfomycin	shandong 1_1	shandong 1_2	1	-
fosfomycin	shandong 1_1	shandong 2	1	-
fosfomycin	shandong 1_1	shandong 3	1	-
fosfomycin	shandong 1_1	shandong 4	1	-
fosfomycin	shandong 1_2	shandong 1_2	1	-
fosfomycin	shandong 1_2	shandong 2	1	-
fosfomycin	shandong 1_2	shandong 3	1	-
fosfomycin	shandong 1_2	shandong 4	1	-
fosfomycin	shandong 2	shandong 2	1	-
fosfomycin	shandong 2	shandong 3	1	-
fosfomycin	shandong 2	shandong 4	1	-
fosfomycin	shandong 3	shandong 3	1	-
fosfomycin	shandong 3	shandong 4	1	-
fosfomycin	shandong 4	shandong 4	1	-
glycopeptide	henan 1	henan 1	1	-
glycopeptide	henan 1	henan 2	1	-
glycopeptide	henan 1	henan 3	1	-
glycopeptide	henan 1	liaoning 1	1	-
glycopeptide	henan 1	liaoning 2	1	-
glycopeptide	henan 1	liaoning 3	1	-
glycopeptide	henan 1	shandong 1_1	1	-
glycopeptide	henan 1	shandong 1_2	1	-
glycopeptide	henan 1	shandong 2	1	-
glycopeptide	henan 1	shandong 3	1	-
glycopeptide	henan 1	shandong 4	1	-
glycopeptide	henan 2	henan 2	1	-
glycopeptide	henan 2	henan 3	1	-
glycopeptide	henan 2	liaoning 1	1	-
glycopeptide	henan 2	liaoning 2	1	-
glycopeptide	henan 2	liaoning 3	1	-
glycopeptide	henan 2	shandong 1_1	1	-
glycopeptide	henan 2	shandong 1_2	1	-
glycopeptide	henan 2	shandong 2	1	-
glycopeptide	henan 2	shandong 3	1	-
glycopeptide	henan 2	shandong 4	1	-
glycopeptide	henan 3	henan 3	1	-
glycopeptide	henan 3	liaoning 1	1	-
glycopeptide	henan 3	liaoning 2	1	-
glycopeptide	henan 3	liaoning 3	1	-
glycopeptide	henan 3	shandong 1_1	1	-
glycopeptide	henan 3	shandong 1_2	1	-
glycopeptide	henan 3	shandong 2	1	-
glycopeptide	henan 3	shandong 3	1	-
glycopeptide	henan 3	shandong 4	1	-
glycopeptide	liaoning 1	liaoning 1	1	-
glycopeptide	liaoning 1	liaoning 2	1	-
glycopeptide	liaoning 1	liaoning 3	1	-
glycopeptide	liaoning 1	shandong 1_1	1	-
glycopeptide	liaoning 1	shandong 1_2	1	-
glycopeptide	liaoning 1	shandong 2	1	-
glycopeptide	liaoning 1	shandong 3	1	-
glycopeptide	liaoning 1	shandong 4	1	-
glycopeptide	liaoning 2	liaoning 2	1	-
glycopeptide	liaoning 2	liaoning 3	1	-
glycopeptide	liaoning 2	shandong 1_1	1	-
glycopeptide	liaoning 2	shandong 1_2	1	-
glycopeptide	liaoning 2	shandong 2	1	-
glycopeptide	liaoning 2	shandong 3	1	-
glycopeptide	liaoning 2	shandong 4	1	-
glycopeptide	liaoning 3	liaoning 3	1	-
glycopeptide	liaoning 3	shandong 1_1	1	-
glycopeptide	liaoning 3	shandong 1_2	1	-
glycopeptide	liaoning 3	shandong 2	1	-
glycopeptide	liaoning 3	shandong 3	1	-
glycopeptide	liaoning 3	shandong 4	1	-
glycopeptide	shandong 1_1	shandong 1_1	1	-
glycopeptide	shandong 1_1	shandong 1_2	1	-
glycopeptide	shandong 1_1	shandong 2	1	-
glycopeptide	shandong 1_1	shandong 3	1	-
glycopeptide	shandong 1_1	shandong 4	1	-
glycopeptide	shandong 1_2	shandong 1_2	1	-
glycopeptide	shandong 1_2	shandong 2	1	-
glycopeptide	shandong 1_2	shandong 3	1	-
glycopeptide	shandong 1_2	shandong 4	1	-
glycopeptide	shandong 2	shandong 2	1	-
glycopeptide	shandong 2	shandong 3	1	-
glycopeptide	shandong 2	shandong 4	1	-
glycopeptide	shandong 3	shandong 3	1	-
glycopeptide	shandong 3	shandong 4	1	-
glycopeptide	shandong 4	shandong 4	1	-
nucleoside	henan 1	henan 1	1	-
nucleoside	henan 1	henan 2	1	-
nucleoside	henan 1	henan 3	1	-
nucleoside	henan 1	liaoning 1	1	-
nucleoside	henan 1	liaoning 2	1	-
nucleoside	henan 1	liaoning 3	1	-
nucleoside	henan 1	shandong 1_1	1	-
nucleoside	henan 1	shandong 1_2	1	-
nucleoside	henan 1	shandong 2	1	-
nucleoside	henan 1	shandong 3	1	-
nucleoside	henan 1	shandong 4	1	-
nucleoside	henan 2	henan 2	1	-
nucleoside	henan 2	henan 3	1	-
nucleoside	henan 2	liaoning 1	1	-
nucleoside	henan 2	liaoning 2	1	-
nucleoside	henan 2	liaoning 3	1	-
nucleoside	henan 2	shandong 1_1	1	-
nucleoside	henan 2	shandong 1_2	1	-
nucleoside	henan 2	shandong 2	1	-
nucleoside	henan 2	shandong 3	1	-
nucleoside	henan 2	shandong 4	1	-
nucleoside	henan 3	henan 3	1	-
nucleoside	henan 3	liaoning 1	1	-
nucleoside	henan 3	liaoning 2	1	-
nucleoside	henan 3	liaoning 3	1	-
nucleoside	henan 3	shandong 1_1	1	-
nucleoside	henan 3	shandong 1_2	1	-
nucleoside	henan 3	shandong 2	1	-
nucleoside	henan 3	shandong 3	1	-
nucleoside	henan 3	shandong 4	1	-
nucleoside	liaoning 1	liaoning 1	1	-
nucleoside	liaoning 1	liaoning 2	1	-
nucleoside	liaoning 1	liaoning 3	1	-
nucleoside	liaoning 1	shandong 1_1	1	-
nucleoside	liaoning 1	shandong 1_2	1	-
nucleoside	liaoning 1	shandong 2	1	-
nucleoside	liaoning 1	shandong 3	1	-
nucleoside	liaoning 1	shandong 4	1	-
nucleoside	liaoning 2	liaoning 2	1	-
nucleoside	liaoning 2	liaoning 3	1	-
nucleoside	liaoning 2	shandong 1_1	1	-
nucleoside	liaoning 2	shandong 1_2	1	-
nucleoside	liaoning 2	shandong 2	1	-
nucleoside	liaoning 2	shandong 3	1	-
nucleoside	liaoning 2	shandong 4	1	-
nucleoside	liaoning 3	liaoning 3	1	-
nucleoside	liaoning 3	shandong 1_1	1	-
nucleoside	liaoning 3	shandong 1_2	1	-
nucleoside	liaoning 3	shandong 2	1	-
nucleoside	liaoning 3	shandong 3	1	-
nucleoside	liaoning 3	shandong 4	1	-
nucleoside	shandong 1_1	shandong 1_1	1	-
nucleoside	shandong 1_1	shandong 1_2	1	-
nucleoside	shandong 1_1	shandong 3	1	-
nucleoside	shandong 1_1	shandong 4	1	-
nucleoside	shandong 1_2	shandong 1_2	1	-
nucleoside	shandong 1_2	shandong 2	1	-
nucleoside	shandong 1_2	shandong 3	1	-
nucleoside	shandong 1_2	shandong 4	1	-
nucleoside	shandong 2	shandong 2	1	-
nucleoside	shandong 2	shandong 3	1	-
nucleoside	shandong 2	shandong 4	1	-
nucleoside	shandong 3	shandong 3	1	-
nucleoside	shandong 3	shandong 4	1	-
nucleoside	shandong 4	shandong 4	1	-
peptide	henan 1	henan 1	1	-
peptide	henan 1	henan 2	1	-
peptide	henan 1	henan 3	1	-
peptide	henan 1	liaoning 1	1	-
peptide	henan 1	liaoning 2	1	-
peptide	henan 1	shandong 1_1	1	-
peptide	henan 1	shandong 1_2	1	-
peptide	henan 1	shandong 2	1	-
peptide	henan 1	shandong 3	1	-
peptide	henan 2	henan 2	1	-
peptide	henan 2	henan 3	1	-
peptide	henan 2	liaoning 1	1	-
peptide	henan 2	liaoning 2	1	-
peptide	henan 2	liaoning 3	1	-
peptide	henan 2	shandong 1_1	1	-
peptide	henan 2	shandong 1_2	1	-
peptide	henan 2	shandong 2	1	-
peptide	henan 2	shandong 3	1	-
peptide	henan 2	shandong 4	1	-
peptide	henan 3	henan 3	1	-
peptide	henan 3	liaoning 1	1	-
peptide	henan 3	liaoning 2	1	-
peptide	henan 3	liaoning 3	1	-
peptide	henan 3	shandong 1_1	1	-
peptide	henan 3	shandong 1_2	1	-
peptide	henan 3	shandong 2	1	-
peptide	henan 3	shandong 3	1	-
peptide	henan 3	shandong 4	1	-
peptide	liaoning 1	liaoning 1	1	-
peptide	liaoning 1	liaoning 2	1	-
peptide	liaoning 1	liaoning 3	1	-
peptide	liaoning 1	shandong 1_1	1	-
peptide	liaoning 1	shandong 1_2	1	-
peptide	liaoning 1	shandong 2	1	-
peptide	liaoning 1	shandong 3	1	-
peptide	liaoning 1	shandong 4	1	-
peptide	liaoning 2	liaoning 2	1	-
peptide	liaoning 2	liaoning 3	1	-
peptide	liaoning 2	shandong 1_1	1	-
peptide	liaoning 2	shandong 1_2	1	-
peptide	liaoning 2	shandong 2	1	-
peptide	liaoning 2	shandong 3	1	-
peptide	liaoning 2	shandong 4	1	-
peptide	liaoning 3	liaoning 3	1	-
peptide	liaoning 3	shandong 1_1	1	-
peptide	liaoning 3	shandong 1_2	1	-
peptide	liaoning 3	shandong 2	1	-
peptide	liaoning 3	shandong 3	1	-
peptide	liaoning 3	shandong 4	1	-
peptide	shandong 1_1	shandong 1_1	1	-
peptide	shandong 1_1	shandong 1_2	1	-
peptide	shandong 1_1	shandong 2	1	-
peptide	shandong 1_1	shandong 3	1	-
peptide	shandong 1_1	shandong 4	1	-
peptide	shandong 1_2	shandong 1_2	1	-
peptide	shandong 1_2	shandong 2	1	-
peptide	shandong 1_2	shandong 3	1	-
peptide	shandong 1_2	shandong 4	1	-
peptide	shandong 2	shandong 2	1	-
peptide	shandong 2	shandong 3	1	-
peptide	shandong 2	shandong 4	1	-
peptide	shandong 3	shandong 3	1	-
peptide	shandong 3	shandong 4	1	-
peptide	shandong 4	shandong 4	1	-
phenicol	henan 1	henan 1	1	-
phenicol	henan 1	henan 2	1	-
phenicol	henan 1	henan 3	1	-
phenicol	henan 1	liaoning 1	1	-
phenicol	henan 1	liaoning 2	1	-
phenicol	henan 1	liaoning 3	1	-
phenicol	henan 1	shandong 1_1	1	-
phenicol	henan 1	shandong 1_2	1	-
phenicol	henan 1	shandong 2	1	-
phenicol	henan 1	shandong 3	1	-
phenicol	henan 1	shandong 4	1	-
phenicol	henan 2	henan 2	1	-
phenicol	henan 2	henan 3	1	-
phenicol	henan 2	liaoning 1	1	-
phenicol	henan 2	liaoning 2	1	-
phenicol	henan 2	liaoning 3	1	-
phenicol	henan 2	shandong 1_1	1	-
phenicol	henan 2	shandong 1_2	1	-
phenicol	henan 2	shandong 2	1	-
phenicol	henan 2	shandong 3	1	-
phenicol	henan 2	shandong 4	1	-
phenicol	henan 3	henan 3	1	-
phenicol	henan 3	liaoning 1	1	-
phenicol	henan 3	liaoning 2	1	-
phenicol	henan 3	liaoning 3	1	-
phenicol	henan 3	shandong 1_1	1	-
phenicol	henan 3	shandong 1_2	1	-
phenicol	henan 3	shandong 2	1	-
phenicol	henan 3	shandong 3	1	-
phenicol	henan 3	shandong 4	1	-
phenicol	liaoning 1	liaoning 1	1	-
phenicol	liaoning 1	liaoning 2	1	-
phenicol	liaoning 1	liaoning 3	1	-
phenicol	liaoning 1	shandong 1_2	1	-
phenicol	liaoning 1	shandong 2	1	-
phenicol	liaoning 1	shandong 3	1	-
phenicol	liaoning 1	shandong 4	1	-
phenicol	liaoning 2	liaoning 2	1	-
phenicol	liaoning 2	liaoning 3	1	-
phenicol	liaoning 2	shandong 1_1	1	-
phenicol	liaoning 2	shandong 1_2	1	-
phenicol	liaoning 2	shandong 2	1	-
phenicol	liaoning 2	shandong 3	1	-
phenicol	liaoning 2	shandong 4	1	-
phenicol	liaoning 3	liaoning 3	1	-
phenicol	liaoning 3	shandong 1_1	1	-
phenicol	liaoning 3	shandong 1_2	1	-
phenicol	liaoning 3	shandong 2	1	-
phenicol	liaoning 3	shandong 3	1	-
phenicol	liaoning 3	shandong 4	1	-
phenicol	shandong 1_1	shandong 1_1	1	-
phenicol	shandong 1_1	shandong 1_2	1	-
phenicol	shandong 1_1	shandong 2	1	-
phenicol	shandong 1_1	shandong 3	1	-
phenicol	shandong 1_2	shandong 1_2	1	-
phenicol	shandong 1_2	shandong 2	1	-
phenicol	shandong 1_2	shandong 3	1	-
phenicol	shandong 1_2	shandong 4	1	-
phenicol	shandong 2	shandong 2	1	-
phenicol	shandong 2	shandong 3	1	-
phenicol	shandong 2	shandong 4	1	-
phenicol	shandong 3	shandong 3	1	-
phenicol	shandong 3	shandong 4	1	-
phenicol	shandong 4	shandong 4	1	-
rifamycin	henan 1	henan 1	1	-
rifamycin	henan 1	henan 2	1	-
rifamycin	henan 1	henan 3	1	-
rifamycin	henan 1	liaoning 1	1	-
rifamycin	henan 1	liaoning 2	1	-
rifamycin	henan 1	liaoning 3	1	-
rifamycin	henan 1	shandong 1_1	1	-
rifamycin	henan 1	shandong 1_2	1	-
rifamycin	henan 1	shandong 2	1	-
rifamycin	henan 1	shandong 3	1	-
rifamycin	henan 1	shandong 4	1	-
rifamycin	henan 2	henan 2	1	-
rifamycin	henan 2	henan 3	1	-
rifamycin	henan 2	liaoning 1	1	-
rifamycin	henan 2	liaoning 2	1	-
rifamycin	henan 2	liaoning 3	1	-
rifamycin	henan 2	shandong 1_1	1	-
rifamycin	henan 2	shandong 1_2	1	-
rifamycin	henan 2	shandong 2	1	-
rifamycin	henan 2	shandong 3	1	-
rifamycin	henan 2	shandong 4	1	-
rifamycin	henan 3	henan 3	1	-
rifamycin	henan 3	liaoning 1	1	-
rifamycin	henan 3	liaoning 2	1	-
rifamycin	henan 3	liaoning 3	1	-
rifamycin	henan 3	shandong 1_1	1	-
rifamycin	henan 3	shandong 1_2	1	-
rifamycin	henan 3	shandong 2	1	-
rifamycin	henan 3	shandong 3	1	-
rifamycin	henan 3	shandong 4	1	-
rifamycin	liaoning 1	liaoning 1	1	-
rifamycin	liaoning 1	liaoning 2	1	-
rifamycin	liaoning 1	liaoning 3	1	-
rifamycin	liaoning 1	shandong 1_1	1	-
rifamycin	liaoning 1	shandong 1_2	1	-
rifamycin	liaoning 1	shandong 2	1	-
rifamycin	liaoning 1	shandong 3	1	-
rifamycin	liaoning 1	shandong 4	1	-
rifamycin	liaoning 2	liaoning 2	1	-
rifamycin	liaoning 2	liaoning 3	1	-
rifamycin	liaoning 2	shandong 1_1	1	-
rifamycin	liaoning 2	shandong 1_2	1	-
rifamycin	liaoning 2	shandong 2	1	-
rifamycin	liaoning 2	shandong 3	1	-
rifamycin	liaoning 2	shandong 4	1	-
rifamycin	liaoning 3	liaoning 3	1	-
rifamycin	liaoning 3	shandong 1_1	1	-
rifamycin	liaoning 3	shandong 1_2	1	-
rifamycin	liaoning 3	shandong 2	1	-
rifamycin	liaoning 3	shandong 3	1	-
rifamycin	liaoning 3	shandong 4	1	-
rifamycin	shandong 1_1	shandong 1_1	1	-
rifamycin	shandong 1_1	shandong 1_2	1	-
rifamycin	shandong 1_1	shandong 2	1	-
rifamycin	shandong 1_1	shandong 3	1	-
rifamycin	shandong 1_1	shandong 4	1	-
rifamycin	shandong 1_2	shandong 1_2	1	-
rifamycin	shandong 1_2	shandong 2	1	-
rifamycin	shandong 1_2	shandong 3	1	-
rifamycin	shandong 1_2	shandong 4	1	-
rifamycin	shandong 2	shandong 2	1	-
rifamycin	shandong 2	shandong 3	1	-
rifamycin	shandong 2	shandong 4	1	-
rifamycin	shandong 3	shandong 3	1	-
rifamycin	shandong 3	shandong 4	1	-
rifamycin	shandong 4	shandong 4	1	-
sulfonamide	henan 1	henan 1	1	-
sulfonamide	henan 1	henan 2	1	-
sulfonamide	henan 1	henan 3	1	-
sulfonamide	henan 1	liaoning 1	1	-
sulfonamide	henan 1	liaoning 2	1	-
sulfonamide	henan 1	liaoning 3	1	-
sulfonamide	henan 1	shandong 1_1	1	-
sulfonamide	henan 1	shandong 1_2	1	-
sulfonamide	henan 1	shandong 2	1	-
sulfonamide	henan 1	shandong 3	1	-
sulfonamide	henan 1	shandong 4	1	-
sulfonamide	henan 2	henan 2	1	-
sulfonamide	henan 2	henan 3	1	-
sulfonamide	henan 2	liaoning 1	1	-
sulfonamide	henan 2	liaoning 2	1	-
sulfonamide	henan 2	liaoning 3	1	-
sulfonamide	henan 2	shandong 1_1	1	-
sulfonamide	henan 2	shandong 1_2	1	-
sulfonamide	henan 2	shandong 2	1	-
sulfonamide	henan 2	shandong 3	1	-
sulfonamide	henan 2	shandong 4	1	-
sulfonamide	henan 3	henan 3	1	-
sulfonamide	henan 3	liaoning 1	1	-
sulfonamide	henan 3	liaoning 2	1	-
sulfonamide	henan 3	liaoning 3	1	-
sulfonamide	henan 3	shandong 1_1	1	-
sulfonamide	henan 3	shandong 1_2	1	-
sulfonamide	henan 3	shandong 2	1	-
sulfonamide	henan 3	shandong 3	1	-
sulfonamide	henan 3	shandong 4	1	-
sulfonamide	liaoning 1	liaoning 1	1	-
sulfonamide	liaoning 1	liaoning 2	1	-
sulfonamide	liaoning 1	liaoning 3	1	-
sulfonamide	liaoning 1	shandong 1_1	1	-
sulfonamide	liaoning 1	shandong 1_2	1	-
sulfonamide	liaoning 1	shandong 2	1	-
sulfonamide	liaoning 1	shandong 3	1	-
sulfonamide	liaoning 1	shandong 4	1	-
sulfonamide	liaoning 2	liaoning 2	1	-
sulfonamide	liaoning 2	liaoning 3	1	-
sulfonamide	liaoning 2	shandong 1_1	1	-
sulfonamide	liaoning 2	shandong 1_2	1	-
sulfonamide	liaoning 2	shandong 2	1	-
sulfonamide	liaoning 2	shandong 3	1	-
sulfonamide	liaoning 2	shandong 4	1	-
sulfonamide	liaoning 3	liaoning 3	1	-
sulfonamide	liaoning 3	shandong 1_1	1	-
sulfonamide	liaoning 3	shandong 1_2	1	-
sulfonamide	liaoning 3	shandong 2	1	-
sulfonamide	liaoning 3	shandong 3	1	-
sulfonamide	liaoning 3	shandong 4	1	-
sulfonamide	shandong 1_1	shandong 1_1	1	-
sulfonamide	shandong 1_1	shandong 1_2	1	-
sulfonamide	shandong 1_1	shandong 2	1	-
sulfonamide	shandong 1_1	shandong 3	1	-
sulfonamide	shandong 1_1	shandong 4	1	-
sulfonamide	shandong 1_2	shandong 1_2	1	-
sulfonamide	shandong 1_2	shandong 2	1	-
sulfonamide	shandong 1_2	shandong 3	1	-
sulfonamide	shandong 1_2	shandong 4	1	-
sulfonamide	shandong 2	shandong 2	1	-
sulfonamide	shandong 2	shandong 3	1	-
sulfonamide	shandong 2	shandong 4	1	-
sulfonamide	shandong 3	shandong 3	1	-
sulfonamide	shandong 3	shandong 4	1	-
sulfonamide	shandong 4	shandong 4	1	-
tetracycline	henan 1	henan 1	1	-
tetracycline	henan 1	henan 2	1	-
tetracycline	henan 1	henan 3	1	-
tetracycline	henan 1	liaoning 1	1	-
tetracycline	henan 1	liaoning 2	1	-
tetracycline	henan 1	liaoning 3	1	-
tetracycline	henan 1	shandong 1_1	1	-
tetracycline	henan 1	shandong 1_2	1	-
tetracycline	henan 1	shandong 2	1	-
tetracycline	henan 1	shandong 3	1	-
tetracycline	henan 1	shandong 4	1	-
tetracycline	henan 2	henan 2	1	-
tetracycline	henan 2	henan 3	1	-
tetracycline	henan 2	liaoning 1	1	-
tetracycline	henan 2	liaoning 2	1	-
tetracycline	henan 2	liaoning 3	1	-
tetracycline	henan 2	shandong 1_1	1	-
tetracycline	henan 2	shandong 1_2	1	-
tetracycline	henan 2	shandong 2	1	-
tetracycline	henan 2	shandong 3	1	-
tetracycline	henan 2	shandong 4	1	-
tetracycline	henan 3	henan 3	1	-
tetracycline	henan 3	liaoning 1	1	-
tetracycline	henan 3	liaoning 2	1	-
tetracycline	henan 3	liaoning 3	1	-
tetracycline	henan 3	shandong 1_1	1	-
tetracycline	henan 3	shandong 1_2	1	-
tetracycline	henan 3	shandong 2	1	-
tetracycline	henan 3	shandong 3	1	-
tetracycline	henan 3	shandong 4	1	-
tetracycline	liaoning 1	liaoning 1	1	-
tetracycline	liaoning 1	liaoning 2	1	-
tetracycline	liaoning 1	liaoning 3	1	-
tetracycline	liaoning 1	shandong 1_1	1	-
tetracycline	liaoning 1	shandong 1_2	1	-
tetracycline	liaoning 1	shandong 2	1	-
tetracycline	liaoning 1	shandong 3	1	-
tetracycline	liaoning 1	shandong 4	1	-
tetracycline	liaoning 2	liaoning 2	1	-
tetracycline	liaoning 2	liaoning 3	1	-
tetracycline	liaoning 2	shandong 1_1	1	-
tetracycline	liaoning 2	shandong 1_2	1	-
tetracycline	liaoning 2	shandong 2	1	-
tetracycline	liaoning 2	shandong 3	1	-
tetracycline	liaoning 2	shandong 4	1	-
tetracycline	liaoning 3	liaoning 3	1	-
tetracycline	liaoning 3	shandong 1_1	1	-
tetracycline	liaoning 3	shandong 1_2	1	-
tetracycline	liaoning 3	shandong 2	1	-
tetracycline	liaoning 3	shandong 3	1	-
tetracycline	liaoning 3	shandong 4	1	-
tetracycline	shandong 1_1	shandong 1_1	1	-
tetracycline	shandong 1_1	shandong 1_2	1	-
tetracycline	shandong 1_1	shandong 2	1	-
tetracycline	shandong 1_1	shandong 3	1	-
tetracycline	shandong 1_1	shandong 4	1	-
tetracycline	shandong 1_2	shandong 1_2	1	-
tetracycline	shandong 1_2	shandong 2	1	-
tetracycline	shandong 1_2	shandong 3	1	-
tetracycline	shandong 1_2	shandong 4	1	-
tetracycline	shandong 2	shandong 2	1	-
tetracycline	shandong 2	shandong 3	1	-
tetracycline	shandong 2	shandong 4	1	-
tetracycline	shandong 3	shandong 3	1	-
tetracycline	shandong 3	shandong 4	1	-
tetracycline	shandong 4	shandong 4	1	-
trimethoprim	henan 1	henan 1	1	-
trimethoprim	henan 1	henan 2	1	-
trimethoprim	henan 1	henan 3	1	-
trimethoprim	henan 1	liaoning 1	1	-
trimethoprim	henan 1	liaoning 2	1	-
trimethoprim	henan 1	liaoning 3	1	-
trimethoprim	henan 1	shandong 1_1	1	-
trimethoprim	henan 1	shandong 1_2	1	-
trimethoprim	henan 1	shandong 2	1	-
trimethoprim	henan 1	shandong 3	1	-
trimethoprim	henan 1	shandong 4	1	-
trimethoprim	henan 2	henan 2	1	-
trimethoprim	henan 2	henan 3	1	-
trimethoprim	henan 2	liaoning 1	1	-
trimethoprim	henan 2	liaoning 2	1	-
trimethoprim	henan 2	liaoning 3	1	-
trimethoprim	henan 2	shandong 1_1	1	-
trimethoprim	henan 2	shandong 1_2	1	-
trimethoprim	henan 2	shandong 2	1	-
trimethoprim	henan 2	shandong 3	1	-
trimethoprim	henan 2	shandong 4	1	-
trimethoprim	henan 3	henan 3	1	-
trimethoprim	henan 3	liaoning 1	1	-
trimethoprim	henan 3	liaoning 2	1	-
trimethoprim	henan 3	liaoning 3	1	-
trimethoprim	henan 3	shandong 1_1	1	-
trimethoprim	henan 3	shandong 1_2	1	-
trimethoprim	henan 3	shandong 2	1	-
trimethoprim	henan 3	shandong 3	1	-
trimethoprim	henan 3	shandong 4	1	-
trimethoprim	liaoning 1	liaoning 1	1	-
trimethoprim	liaoning 1	liaoning 2	1	-
trimethoprim	liaoning 1	liaoning 3	1	-
trimethoprim	liaoning 1	shandong 1_1	1	-
trimethoprim	liaoning 1	shandong 1_2	1	-
trimethoprim	liaoning 1	shandong 2	1	-
trimethoprim	liaoning 1	shandong 3	1	-
trimethoprim	liaoning 1	shandong 4	1	-
trimethoprim	liaoning 2	liaoning 2	1	-
trimethoprim	liaoning 2	liaoning 3	1	-
trimethoprim	liaoning 2	shandong 1_1	1	-
trimethoprim	liaoning 2	shandong 1_2	1	-
trimethoprim	liaoning 2	shandong 2	1	-
trimethoprim	liaoning 2	shandong 3	1	-
trimethoprim	liaoning 2	shandong 4	1	-
trimethoprim	liaoning 3	liaoning 3	1	-
trimethoprim	liaoning 3	shandong 1_1	1	-
trimethoprim	liaoning 3	shandong 1_2	1	-
trimethoprim	liaoning 3	shandong 2	1	-
trimethoprim	liaoning 3	shandong 3	1	-
trimethoprim	liaoning 3	shandong 4	1	-
trimethoprim	shandong 1_1	shandong 1_1	1	-
trimethoprim	shandong 1_1	shandong 1_2	1	-
trimethoprim	shandong 1_1	shandong 2	1	-
trimethoprim	shandong 1_1	shandong 3	1	-
trimethoprim	shandong 1_1	shandong 4	1	-
trimethoprim	shandong 1_2	shandong 1_2	1	-
trimethoprim	shandong 1_2	shandong 2	1	-
trimethoprim	shandong 1_2	shandong 3	1	-
trimethoprim	shandong 1_2	shandong 4	1	-
trimethoprim	shandong 2	shandong 2	1	-
trimethoprim	shandong 2	shandong 3	1	-
trimethoprim	shandong 2	shandong 4	1	-
trimethoprim	shandong 3	shandong 3	1	-
trimethoprim	shandong 3	shandong 4	1	-
trimethoprim	shandong 4	shandong 4	1	-

## Sheet: Source
Antibiotic	Source 1	Source 2	holm pvalue	Relation
MLSB	Chicken carcass	Chicken faeces	4.94898e-40	Increase
tetracycline	Chicken carcass	Chicken faeces	5.32488e-30	Increase
MLSB	Chicken faeces	Outdoor soil	3.03209e-26	Decrease
phenicol	Chicken carcass	Chicken faeces	4.52583e-26	Increase
tetracycline	Chicken faeces	Outdoor soil	7.91037e-26	Decrease
aminoglycoside	Chicken faeces	Outdoor soil	1.36127e-24	Decrease
phenicol	Chicken faeces	Outdoor soil	3.05162e-20	Decrease
aminoglycoside	Chicken carcass	Chicken faeces	1.25878e-18	Increase
MLSB	Chicken feather	Chicken carcass	1.60457e-14	Decrease
phenicol	Chicken feather	Chicken carcass	5.98124e-14	Decrease
tetracycline	Chicken feather	Chicken carcass	6.79733e-14	Decrease
tetracycline	Chicken feather	Outdoor soil	8.28974e-13	Decrease
MLSB	Chicken feather	Outdoor soil	1.28731e-12	Decrease
phenicol	Chicken feather	Outdoor soil	3.76971e-12	Decrease
nucleoside	Chicken feather	Outdoor soil	4.29612e-12	Decrease
aminoglycoside	Chicken feather	Outdoor soil	5.9728e-12	Decrease
aminoglycoside	Chicken carcass	Outdoor soil	6.75067e-12	Decrease
aminoglycoside	Chicken faeces	wastewater	7.74447e-11	Decrease
phenicol	barn floor	Chicken carcass	1.07027e-10	Decrease
tetracycline	Chicken faeces	wastewater	1.07953e-10	Decrease
aminoglycoside	barn floor	Chicken carcass	1.44425e-10	Decrease
MLSB	Chicken carcass	Outdoor soil	2.15745e-10	Decrease
MLSB	barn floor	Chicken carcass	3.05724e-10	Decrease
tetracycline	barn floor	Chicken carcass	3.72277e-10	Decrease
MLSB	Chicken faeces	wastewater	4.91274e-10	Decrease
phenicol	Chicken faeces	wastewater	5.97386e-10	Decrease
beta lactam	Chicken faeces	Outdoor soil	1.41707e-09	Decrease
phenicol	barn floor	Outdoor soil	2.62564e-09	Decrease
MLSB	barn floor	Outdoor soil	2.72576e-09	Decrease
aminoglycoside	barn floor	Outdoor soil	2.72576e-09	Decrease
nucleoside	Chicken faeces	Outdoor soil	2.72576e-09	Decrease
tetracycline	barn floor	Outdoor soil	2.72576e-09	Decrease
fosfomycin	Chicken carcass	Chicken faeces	3.09996e-09	Increase
MDR	Chicken carcass	Chicken faeces	3.90324e-09	Increase
fluoroquinolone	Chicken carcass	Chicken faeces	1.19557e-08	Increase
trimethoprim	Chicken carcass	Chicken faeces	1.38484e-08	Increase
tetracycline	Chicken carcass	Outdoor soil	5.11506e-08	Decrease
fosfomycin	barn floor	Chicken carcass	6.35692e-08	Decrease
nucleoside	barn floor	Outdoor soil	1.24958e-07	Decrease
aminoglycoside	Chicken feather	wastewater	1.41883e-07	Decrease
phenicol	Chicken feather	wastewater	1.41883e-07	Decrease
tetracycline	Chicken feather	wastewater	1.65335e-07	Decrease
fosfomycin	barn floor	Outdoor soil	8.06426e-07	Decrease
sulfonamide	barn floor	Chicken carcass	8.26884e-07	Decrease
beta lactam	Chicken carcass	Chicken faeces	8.42959e-07	Increase
aminoglycoside	Chicken feather	Chicken carcass	1.67339e-06	Decrease
MLSB	Chicken faeces	processing line	2.48464e-06	Decrease
nucleoside	Chicken feather	wastewater	2.54977e-06	Decrease
sulfonamide	barn floor	Outdoor soil	2.76021e-06	Decrease
MLSB	Chicken feather	wastewater	2.93712e-06	Decrease
MDR	Chicken faeces	Outdoor soil	3.25103e-06	Decrease
tetracycline	Chicken faeces	processing line	3.33841e-06	Decrease
aminoglycoside	Chicken faeces	processing line	3.88266e-06	Decrease
trimethoprim	barn floor	Chicken carcass	4.33119e-06	Decrease
aminoglycoside	barn floor	wastewater	4.70127e-06	Decrease
phenicol	barn floor	wastewater	4.70127e-06	Decrease
tetracycline	barn floor	wastewater	6.14305e-06	Decrease
peptide	Chicken carcass	Chicken faeces	6.73664e-06	Increase
aminoglycoside	barn floor	Chicken feather	9.62888e-06	Decrease
fosfomycin	Chicken faeces	Outdoor soil	1.01916e-05	Decrease
MLSB	barn floor	wastewater	1.66025e-05	Decrease
phenicol	Chicken faeces	processing line	1.76269e-05	Decrease
fluoroquinolone	Chicken faeces	Outdoor soil	2.08947e-05	Decrease
trimethoprim	Chicken faeces	Outdoor soil	2.44888e-05	Decrease
sulfonamide	barn floor	wastewater	3.15467e-05	Decrease
trimethoprim	barn floor	Outdoor soil	3.50491e-05	Decrease
aminoglycoside	Chicken carcass	wastewater	6.08383e-05	Decrease
nucleoside	Chicken feather	Chicken carcass	6.84099e-05	Decrease
MLSB	Chicken feather	processing line	8.76716e-05	Decrease
aminoglycoside	Chicken feather	processing line	8.76716e-05	Decrease
phenicol	Chicken feather	processing line	8.76716e-05	Decrease
tetracycline	Chicken feather	processing line	8.76716e-05	Decrease
nucleoside	Chicken feather	processing line	0.000183457	Decrease
fosfomycin	barn floor	wastewater	0.000256532	Decrease
nucleoside	barn floor	wastewater	0.000271574	Decrease
MLSB	barn floor	processing line	0.000513544	Decrease
aminoglycoside	barn floor	processing line	0.000513544	Decrease
phenicol	barn floor	processing line	0.000513544	Decrease
tetracycline	barn floor	processing line	0.000554672	Decrease
sulfonamide	Chicken faeces	Outdoor soil	0.000643308	Decrease
sulfonamide	Chicken carcass	Chicken faeces	0.000646306	Increase
rifamycin	Chicken carcass	Chicken faeces	0.000880978	Increase
beta lactam	Chicken faeces	wastewater	0.00103433	Decrease
peptide	Chicken faeces	Outdoor soil	0.00112051	Decrease
phenicol	barn floor	Chicken faeces	0.00112411	Decrease
trimethoprim	barn floor	Chicken feather	0.00124737	Decrease
MDR	Chicken feather	Chicken faeces	0.00136118	Increase
sulfonamide	barn floor	processing line	0.00136938	Decrease
aminoglycoside	barn floor	Chicken faeces	0.00167624	Decrease
fosfomycin	barn floor	Chicken feather	0.00199124	Decrease
trimethoprim	barn floor	wastewater	0.00270521	Decrease
fluoroquinolone	Chicken feather	Chicken faeces	0.00285479	Increase
nucleoside	barn floor	processing line	0.00357999	Decrease
tetracycline	barn floor	Chicken faeces	0.00370938	Decrease
phenicol	barn floor	Chicken feather	0.00388544	Decrease
aminoglycoside	Chicken carcass	processing line	0.00468691	Decrease
nucleoside	Chicken faeces	wastewater	0.00585601	Decrease
MLSB	Chicken feather	Chicken faeces	0.00604228	Increase
fosfomycin	barn floor	processing line	0.00894391	Decrease
nucleoside	barn floor	Chicken carcass	0.0145808	Decrease
sulfonamide	barn floor	Chicken feather	0.0150437	Decrease
rifamycin	Chicken faeces	Outdoor soil	0.020288	Decrease
peptide	Chicken feather	Chicken faeces	0.0207871	Increase
sulfonamide	Chicken faeces	wastewater	0.022247	Decrease
beta lactam	Chicken feather	Outdoor soil	0.0254081	Decrease
trimethoprim	Chicken feather	Chicken faeces	0.0467713	Increase
trimethoprim	barn floor	processing line	0.0499213	Decrease
fosfomycin	Chicken faeces	wastewater	0.0534314	-
trimethoprim	Chicken faeces	wastewater	0.0534314	-
nucleoside	Chicken carcass	Outdoor soil	0.0566391	-
beta lactam	Chicken faeces	processing line	0.0575514	-
MDR	Chicken faeces	wastewater	0.067132	-
beta lactam	Chicken carcass	Outdoor soil	0.0932779	-
sulfonamide	Chicken feather	wastewater	0.101505	-
nucleoside	Chicken faeces	processing line	0.104289	-
MLSB	barn floor	Chicken feather	0.109367	-
beta lactam	Chicken feather	Chicken faeces	0.166617	-
sulfonamide	Chicken feather	Outdoor soil	0.166808	-
rifamycin	Chicken feather	Chicken faeces	0.178278	-
nucleoside	Chicken carcass	Chicken faeces	0.190914	-
fosfomycin	Chicken feather	Chicken faeces	0.191505	-
tetracycline	Outdoor soil	wastewater	0.232923	-
peptide	barn floor	Chicken faeces	0.304865	-
nucleoside	Chicken feather	Chicken faeces	0.326376	-
sulfonamide	Chicken faeces	processing line	0.347192	-
sulfonamide	Chicken feather	processing line	0.446711	-
MDR	barn floor	Chicken faeces	0.448192	-
peptide	Chicken faeces	wastewater	0.472654	-
fluoroquinolone	Chicken faeces	wastewater	0.528189	-
MLSB	Outdoor soil	wastewater	0.608872	-
beta lactam	Chicken feather	wastewater	0.628845	-
MDR	Chicken faeces	processing line	0.748437	-
sulfonamide	barn floor	Chicken faeces	0.826287	-
MDR	barn floor	barn floor	1	-
MDR	barn floor	Chicken feather	1	-
MDR	barn floor	Chicken carcass	1	-
MDR	barn floor	processing line	1	-
MDR	barn floor	Outdoor soil	1	-
MDR	barn floor	wastewater	1	-
MDR	Chicken feather	Chicken feather	1	-
MDR	Chicken feather	Chicken carcass	1	-
MDR	Chicken feather	processing line	1	-
MDR	Chicken feather	Outdoor soil	1	-
MDR	Chicken feather	wastewater	1	-
MDR	Chicken carcass	Chicken carcass	1	-
MDR	Chicken carcass	processing line	1	-
MDR	Chicken carcass	Outdoor soil	1	-
MDR	Chicken carcass	wastewater	1	-
MDR	Chicken faeces	Chicken faeces	1	-
MDR	processing line	processing line	1	-
MDR	processing line	Outdoor soil	1	-
MDR	processing line	wastewater	1	-
MDR	Outdoor soil	Outdoor soil	1	-
MDR	Outdoor soil	wastewater	1	-
MDR	wastewater	wastewater	1	-
MLSB	barn floor	barn floor	1	-
MLSB	barn floor	Chicken faeces	1	-
MLSB	Chicken feather	Chicken feather	1	-
MLSB	Chicken carcass	Chicken carcass	1	-
MLSB	Chicken carcass	processing line	1	-
MLSB	Chicken carcass	wastewater	1	-
MLSB	Chicken faeces	Chicken faeces	1	-
MLSB	processing line	processing line	1	-
MLSB	processing line	Outdoor soil	1	-
MLSB	processing line	wastewater	1	-
MLSB	Outdoor soil	Outdoor soil	1	-
MLSB	wastewater	wastewater	1	-
aminoglycoside	barn floor	barn floor	1	-
aminoglycoside	Chicken feather	Chicken feather	1	-
aminoglycoside	Chicken feather	Chicken faeces	1	-
aminoglycoside	Chicken carcass	Chicken carcass	1	-
aminoglycoside	Chicken faeces	Chicken faeces	1	-
aminoglycoside	processing line	processing line	1	-
aminoglycoside	processing line	Outdoor soil	1	-
aminoglycoside	processing line	wastewater	1	-
aminoglycoside	Outdoor soil	Outdoor soil	1	-
aminoglycoside	Outdoor soil	wastewater	1	-
aminoglycoside	wastewater	wastewater	1	-
beta lactam	barn floor	barn floor	1	-
beta lactam	barn floor	Chicken feather	1	-
beta lactam	barn floor	Chicken carcass	1	-
beta lactam	barn floor	Chicken faeces	1	-
beta lactam	barn floor	processing line	1	-
beta lactam	barn floor	Outdoor soil	1	-
beta lactam	barn floor	wastewater	1	-
beta lactam	Chicken feather	Chicken feather	1	-
beta lactam	Chicken feather	Chicken carcass	1	-
beta lactam	Chicken feather	processing line	1	-
beta lactam	Chicken carcass	Chicken carcass	1	-
beta lactam	Chicken carcass	processing line	1	-
beta lactam	Chicken carcass	wastewater	1	-
beta lactam	Chicken faeces	Chicken faeces	1	-
beta lactam	processing line	processing line	1	-
beta lactam	processing line	Outdoor soil	1	-
beta lactam	processing line	wastewater	1	-
beta lactam	Outdoor soil	Outdoor soil	1	-
beta lactam	Outdoor soil	wastewater	1	-
beta lactam	wastewater	wastewater	1	-
fluoroquinolone	barn floor	barn floor	1	-
fluoroquinolone	barn floor	Chicken feather	1	-
fluoroquinolone	barn floor	Chicken carcass	1	-
fluoroquinolone	barn floor	Chicken faeces	1	-
fluoroquinolone	barn floor	processing line	1	-
fluoroquinolone	barn floor	Outdoor soil	1	-
fluoroquinolone	barn floor	wastewater	1	-
fluoroquinolone	Chicken feather	Chicken feather	1	-
fluoroquinolone	Chicken feather	Chicken carcass	1	-
fluoroquinolone	Chicken feather	processing line	1	-
fluoroquinolone	Chicken feather	Outdoor soil	1	-
fluoroquinolone	Chicken feather	wastewater	1	-
fluoroquinolone	Chicken carcass	Chicken carcass	1	-
fluoroquinolone	Chicken carcass	processing line	1	-
fluoroquinolone	Chicken carcass	Outdoor soil	1	-
fluoroquinolone	Chicken carcass	wastewater	1	-
fluoroquinolone	Chicken faeces	Chicken faeces	1	-
fluoroquinolone	Chicken faeces	processing line	1	-
fluoroquinolone	processing line	processing line	1	-
fluoroquinolone	processing line	Outdoor soil	1	-
fluoroquinolone	processing line	wastewater	1	-
fluoroquinolone	Outdoor soil	Outdoor soil	1	-
fluoroquinolone	Outdoor soil	wastewater	1	-
fluoroquinolone	wastewater	wastewater	1	-
fosfomycin	barn floor	barn floor	1	-
fosfomycin	barn floor	Chicken faeces	1	-
fosfomycin	Chicken feather	Chicken feather	1	-
fosfomycin	Chicken feather	Chicken carcass	1	-
fosfomycin	Chicken feather	processing line	1	-
fosfomycin	Chicken feather	Outdoor soil	1	-
fosfomycin	Chicken feather	wastewater	1	-
fosfomycin	Chicken carcass	Chicken carcass	1	-
fosfomycin	Chicken carcass	processing line	1	-
fosfomycin	Chicken carcass	Outdoor soil	1	-
fosfomycin	Chicken carcass	wastewater	1	-
fosfomycin	Chicken faeces	Chicken faeces	1	-
fosfomycin	Chicken faeces	processing line	1	-
fosfomycin	processing line	processing line	1	-
fosfomycin	processing line	Outdoor soil	1	-
fosfomycin	processing line	wastewater	1	-
fosfomycin	Outdoor soil	Outdoor soil	1	-
fosfomycin	Outdoor soil	wastewater	1	-
fosfomycin	wastewater	wastewater	1	-
glycopeptide	barn floor	barn floor	1	-
glycopeptide	barn floor	Chicken feather	1	-
glycopeptide	barn floor	Chicken carcass	1	-
glycopeptide	barn floor	Chicken faeces	1	-
glycopeptide	barn floor	processing line	1	-
glycopeptide	barn floor	Outdoor soil	1	-
glycopeptide	barn floor	wastewater	1	-
glycopeptide	Chicken feather	Chicken feather	1	-
glycopeptide	Chicken feather	Chicken carcass	1	-
glycopeptide	Chicken feather	Chicken faeces	1	-
glycopeptide	Chicken feather	processing line	1	-
glycopeptide	Chicken feather	Outdoor soil	1	-
glycopeptide	Chicken feather	wastewater	1	-
glycopeptide	Chicken carcass	Chicken carcass	1	-
glycopeptide	Chicken carcass	Chicken faeces	1	-
glycopeptide	Chicken carcass	processing line	1	-
glycopeptide	Chicken carcass	Outdoor soil	1	-
glycopeptide	Chicken carcass	wastewater	1	-
glycopeptide	Chicken faeces	Chicken faeces	1	-
glycopeptide	Chicken faeces	processing line	1	-
glycopeptide	Chicken faeces	Outdoor soil	1	-
glycopeptide	Chicken faeces	wastewater	1	-
glycopeptide	processing line	processing line	1	-
glycopeptide	processing line	Outdoor soil	1	-
glycopeptide	processing line	wastewater	1	-
glycopeptide	Outdoor soil	Outdoor soil	1	-
glycopeptide	Outdoor soil	wastewater	1	-
glycopeptide	wastewater	wastewater	1	-
nucleoside	barn floor	barn floor	1	-
nucleoside	barn floor	Chicken feather	1	-
nucleoside	barn floor	Chicken faeces	1	-
nucleoside	Chicken feather	Chicken feather	1	-
nucleoside	Chicken carcass	Chicken carcass	1	-
nucleoside	Chicken carcass	processing line	1	-
nucleoside	Chicken carcass	wastewater	1	-
nucleoside	Chicken faeces	Chicken faeces	1	-
nucleoside	processing line	processing line	1	-
nucleoside	processing line	Outdoor soil	1	-
nucleoside	processing line	wastewater	1	-
nucleoside	Outdoor soil	Outdoor soil	1	-
nucleoside	Outdoor soil	wastewater	1	-
nucleoside	wastewater	wastewater	1	-
peptide	barn floor	barn floor	1	-
peptide	barn floor	Chicken feather	1	-
peptide	barn floor	Chicken carcass	1	-
peptide	barn floor	processing line	1	-
peptide	barn floor	Outdoor soil	1	-
peptide	barn floor	wastewater	1	-
peptide	Chicken feather	Chicken feather	1	-
peptide	Chicken feather	Chicken carcass	1	-
peptide	Chicken feather	processing line	1	-
peptide	Chicken feather	Outdoor soil	1	-
peptide	Chicken feather	wastewater	1	-
peptide	Chicken carcass	Chicken carcass	1	-
peptide	Chicken carcass	processing line	1	-
peptide	Chicken carcass	Outdoor soil	1	-
peptide	Chicken carcass	wastewater	1	-
peptide	Chicken faeces	Chicken faeces	1	-
peptide	Chicken faeces	processing line	1	-
peptide	processing line	processing line	1	-
peptide	processing line	Outdoor soil	1	-
peptide	processing line	wastewater	1	-
peptide	Outdoor soil	Outdoor soil	1	-
peptide	Outdoor soil	wastewater	1	-
peptide	wastewater	wastewater	1	-
phenicol	barn floor	barn floor	1	-
phenicol	Chicken feather	Chicken feather	1	-
phenicol	Chicken feather	Chicken faeces	1	-
phenicol	Chicken carcass	Chicken carcass	1	-
phenicol	Chicken carcass	processing line	1	-
phenicol	Chicken carcass	Outdoor soil	1	-
phenicol	Chicken carcass	wastewater	1	-
phenicol	Chicken faeces	Chicken faeces	1	-
phenicol	processing line	processing line	1	-
phenicol	processing line	Outdoor soil	1	-
phenicol	processing line	wastewater	1	-
phenicol	Outdoor soil	Outdoor soil	1	-
phenicol	Outdoor soil	wastewater	1	-
phenicol	wastewater	wastewater	1	-
rifamycin	barn floor	barn floor	1	-
rifamycin	barn floor	Chicken feather	1	-
rifamycin	barn floor	Chicken carcass	1	-
rifamycin	barn floor	Chicken faeces	1	-
rifamycin	barn floor	processing line	1	-
rifamycin	barn floor	Outdoor soil	1	-
rifamycin	barn floor	wastewater	1	-
rifamycin	Chicken feather	Chicken feather	1	-
rifamycin	Chicken feather	Chicken carcass	1	-
rifamycin	Chicken feather	processing line	1	-
rifamycin	Chicken feather	Outdoor soil	1	-
rifamycin	Chicken feather	wastewater	1	-
rifamycin	Chicken carcass	Chicken carcass	1	-
rifamycin	Chicken carcass	processing line	1	-
rifamycin	Chicken carcass	Outdoor soil	1	-
rifamycin	Chicken carcass	wastewater	1	-
rifamycin	Chicken faeces	Chicken faeces	1	-
rifamycin	Chicken faeces	processing line	1	-
rifamycin	Chicken faeces	wastewater	1	-
rifamycin	processing line	processing line	1	-
rifamycin	processing line	Outdoor soil	1	-
rifamycin	processing line	wastewater	1	-
rifamycin	Outdoor soil	Outdoor soil	1	-
rifamycin	Outdoor soil	wastewater	1	-
rifamycin	wastewater	wastewater	1	-
sulfonamide	barn floor	barn floor	1	-
sulfonamide	Chicken feather	Chicken feather	1	-
sulfonamide	Chicken feather	Chicken carcass	1	-
sulfonamide	Chicken feather	Chicken faeces	1	-
sulfonamide	Chicken carcass	Chicken carcass	1	-
sulfonamide	Chicken carcass	processing line	1	-
sulfonamide	Chicken carcass	Outdoor soil	1	-
sulfonamide	Chicken carcass	wastewater	1	-
sulfonamide	Chicken faeces	Chicken faeces	1	-
sulfonamide	processing line	processing line	1	-
sulfonamide	processing line	Outdoor soil	1	-
sulfonamide	processing line	wastewater	1	-
sulfonamide	Outdoor soil	Outdoor soil	1	-
sulfonamide	Outdoor soil	wastewater	1	-
sulfonamide	wastewater	wastewater	1	-
tetracycline	barn floor	barn floor	1	-
tetracycline	barn floor	Chicken feather	1	-
tetracycline	Chicken feather	Chicken feather	1	-
tetracycline	Chicken feather	Chicken faeces	1	-
tetracycline	Chicken carcass	Chicken carcass	1	-
tetracycline	Chicken carcass	processing line	1	-
tetracycline	Chicken carcass	wastewater	1	-
tetracycline	Chicken faeces	Chicken faeces	1	-
tetracycline	processing line	processing line	1	-
tetracycline	processing line	Outdoor soil	1	-
tetracycline	processing line	wastewater	1	-
tetracycline	Outdoor soil	Outdoor soil	1	-
tetracycline	wastewater	wastewater	1	-
trimethoprim	barn floor	barn floor	1	-
trimethoprim	barn floor	Chicken faeces	1	-
trimethoprim	Chicken feather	Chicken feather	1	-
trimethoprim	Chicken feather	Chicken carcass	1	-
trimethoprim	Chicken feather	processing line	1	-
trimethoprim	Chicken feather	Outdoor soil	1	-
trimethoprim	Chicken feather	wastewater	1	-
trimethoprim	Chicken carcass	Chicken carcass	1	-
trimethoprim	Chicken carcass	processing line	1	-
trimethoprim	Chicken carcass	Outdoor soil	1	-
trimethoprim	Chicken carcass	wastewater	1	-
trimethoprim	Chicken faeces	Chicken faeces	1	-
trimethoprim	Chicken faeces	processing line	1	-
trimethoprim	processing line	processing line	1	-
trimethoprim	processing line	Outdoor soil	1	-
trimethoprim	processing line	wastewater	1	-
trimethoprim	Outdoor soil	Outdoor soil	1	-
trimethoprim	Outdoor soil	wastewater	1	-
trimethoprim	wastewater	wastewater	1	-
