# Supplementary material for: Machine learning and metagenomics enhance surveillance of antimicrobial resistance in chicken production in China
Source: Research Square preprint supplement (doi:10.21203/rs.3.rs-2458989/v1), 2023-01-13
Supplement: Supplementary file 10 [file e793023027e0c5bf7df70b8d.xlsx]

## Sheet: _xltb_storage_
XL Toolbox Settings
	export_preset	<?xml version="1.0" encoding="utf-16"?>_x000D_ <Preset xmlns:xsd="http://www.w3.org/2001/XMLSchema" xmlns:xsi="http://www.w3.org/2001/XMLSchema-instance">_x000D_ <Name>Tiff, 1200 dpi, RGB, Transparent white</Name>_x000D_ <Dpi>1200</Dpi>_x000D_ <FileType>Tiff</FileType>_x000D_ <ColorSpace>Rgb</ColorSpace>_x000D_ <Transparency>TransparentWhite</Transparency>_x000D_ <UseColorProfile>false</UseColorP…
	export_path	D:\OneDrive - The University of Nottingham\FARMWATCH\CommercialFarmsMGS\MobileARGs\numberofMGEsperARG.tif

## Sheet: SharedMobileARGs
Source.Name	Source	Chicken/Environment	Farm/Slaughterhouse	Farm	Province	Column1	Sample-contig	MGE	ARG	MobileARG	Distance	CR Genes	ML Genes	Temp Genes	Hum Genes
HAYS1JFT1-6	Broiler faeces	Chicken	Farm	Henan 1	Henan	k119_185878	HAYS1JFT1-6_l500.fa-k119_185878	IS10L_IS4_IS10	AAC(3)-IIe	IS10L_IS4_IS10-AAC(3)-IIe	36	1	1	1	1
LNLDJFT2-19	Broiler faeces	Chicken	Farm	Liaoning 3	Liaoning	k119_645996	LNLDJFT2-19_l500.fa-k119_645996	IS10L_IS4_IS10	AAC(3)-IIe	IS10L_IS4_IS10-AAC(3)-IIe	36	1	1	1	1
SDPD1JFT1.15	Broiler faeces	Chicken	Farm	Shandong 2	Shandong	k119_470239	SDPD1JFT1.15_l500.fa-k119_470239	IS10L_IS4_IS10	AAC(3)-IIe	IS10L_IS4_IS10-AAC(3)-IIe	36	1	1	1	1
SDPD4JFT2-13	Broiler faeces	Chicken	Farm	Shandong 4	Shandong	k119_661687	SDPD4JFT2-13_l500.fa-k119_661687	IS10L_IS4_IS10	AAC(3)-IIe	IS10L_IS4_IS10-AAC(3)-IIe	36	1	1	1	1
HAYS1JFT2-1	Broiler faeces	Chicken	Farm	Henan 1	Henan	k119_13739	HAYS1JFT2-1_l500.fa-k119_13739	IS15_IS6_unknown	AAC(3)-IIe	IS15_IS6_unknown-AAC(3)-IIe	225	1	1	1	1
HAYS3JFT2-1	Broiler faeces	Chicken	Farm	Henan 3	Henan	k119_65873	HAYS3JFT2-1_l500.fa-k119_65873	IS15_IS6_unknown	AAC(3)-IIe	IS15_IS6_unknown-AAC(3)-IIe	1697	1	1	1	1
LNPCJFT2_13	Broiler faeces	Chicken	Farm	Liaoning 1	Liaoning	k119_5827	LNPCJFT2_13_l500.fa-k119_5827	IS15_IS6_unknown	AAC(3)-IIe	IS15_IS6_unknown-AAC(3)-IIe	1697	1	1	1	1
PDJFT2S4L0718	Broiler faeces	Chicken	Farm	Shandong 1_1	Shandong	k119_512301	PDJFT2S4L0718_l500.fa-k119_512301	IS15_IS6_unknown	AAC(3)-IIe	IS15_IS6_unknown-AAC(3)-IIe	44	1	1	1	1
PDJFT1S3L0101	Broiler faeces	Chicken	Farm	Shandong 1_1	Shandong	k119_276902	PDJFT1S3L0101_l500.fa-k119_276902	IS15_IS6_unknown	AAC(3)-IIe	IS15_IS6_unknown-AAC(3)-IIe	1697	1	1	1	1
PDJFT1S3L0609	Broiler faeces	Chicken	Farm	Shandong 1_1	Shandong	k119_199086	PDJFT1S3L0609_l500.fa-k119_199086	IS15_IS6_unknown	AAC(3)-IIe	IS15_IS6_unknown-AAC(3)-IIe	1697	1	1	1	1
PDJFT1S4L0212	Broiler faeces	Chicken	Farm	Shandong 1_1	Shandong	k119_250923	PDJFT1S4L0212_l500.fa-k119_250923	IS15_IS6_unknown	AAC(3)-IIe	IS15_IS6_unknown-AAC(3)-IIe	1697	1	1	1	1
PDJFT1S4L0313	Broiler faeces	Chicken	Farm	Shandong 1_1	Shandong	k119_15318	PDJFT1S4L0313_l500.fa-k119_15318	IS15_IS6_unknown	AAC(3)-IIe	IS15_IS6_unknown-AAC(3)-IIe	1697	1	1	1	1
PDJFT1S4L0515	Broiler faeces	Chicken	Farm	Shandong 1_1	Shandong	k119_7037	PDJFT1S4L0515_l500.fa-k119_7037	IS15_IS6_unknown	AAC(3)-IIe	IS15_IS6_unknown-AAC(3)-IIe	1697	1	1	1	1
PDJFT1S4L0616	Broiler faeces	Chicken	Farm	Shandong 1_1	Shandong	k119_234514	PDJFT1S4L0616_l500.fa-k119_234514	IS15_IS6_unknown	AAC(3)-IIe	IS15_IS6_unknown-AAC(3)-IIe	1697	1	1	1	1
PDJFT2S4L0717	Broiler faeces	Chicken	Farm	Shandong 1_1	Shandong	k119_923052	PDJFT2S4L0717_l500.fa-k119_923052	IS15_IS6_unknown	AAC(3)-IIe	IS15_IS6_unknown-AAC(3)-IIe	1697	1	1	1	1
PDJFL1C6	Broiler faeces	Chicken	Farm	Shandong 1_2	Shandong	k119_47190	PDJFL1C6_l500.fa-k119_47190	IS15_IS6_unknown	AAC(3)-IIe	IS15_IS6_unknown-AAC(3)-IIe	44	1	1	1	1
SDPD1JFT1.14	Broiler faeces	Chicken	Farm	Shandong 2	Shandong	k119_290643	SDPD1JFT1.14_l500.fa-k119_290643	IS15_IS6_unknown	AAC(3)-IIe	IS15_IS6_unknown-AAC(3)-IIe	1697	1	1	1	1
SDPD1YMT1.02	Broiler Feather	Chicken	Farm	Shandong 2	Shandong	k119_150063	SDPD1YMT1.02_l500.fa-k119_150063	IS15_IS6_unknown	AAC(3)-IIe	IS15_IS6_unknown-AAC(3)-IIe	44	1	1	1	1
SDPD4JFT1-17	Broiler faeces	Chicken	Farm	Shandong 4	Shandong	k119_549191	SDPD4JFT1-17_l500.fa-k119_549191	IS15_IS6_unknown	AAC(3)-IIe	IS15_IS6_unknown-AAC(3)-IIe	2188	1	1	1	1
LNPCJFT2_03	Broiler faeces	Chicken	Farm	Liaoning 1	Liaoning	k119_81078	LNPCJFT2_03_l500.fa-k119_81078	IS15_IS6_unknown	dfrA1	IS15_IS6_unknown-dfrA1	44	1	1	1	1
LNPCJFT2_05	Broiler faeces	Chicken	Farm	Liaoning 1	Liaoning	k119_238944	LNPCJFT2_05_l500.fa-k119_238944	IS15_IS6_unknown	dfrA1	IS15_IS6_unknown-dfrA1	44	1	1	1	1
LNPCJFT2_11	Broiler faeces	Chicken	Farm	Liaoning 1	Liaoning	k119_246613	LNPCJFT2_11_l500.fa-k119_246613	IS15_IS6_unknown	dfrA1	IS15_IS6_unknown-dfrA1	44	1	1	1	1
LNPCJFT2_18	Broiler faeces	Chicken	Farm	Liaoning 1	Liaoning	k119_232807	LNPCJFT2_18_l500.fa-k119_232807	IS15_IS6_unknown	dfrA1	IS15_IS6_unknown-dfrA1	44	1	1	1	1
LNPCJFT2_17	Broiler faeces	Chicken	Farm	Liaoning 1	Liaoning	k119_105236	LNPCJFT2_17_l500.fa-k119_105236	IS15_IS6_unknown	dfrA1	IS15_IS6_unknown-dfrA1	44	1	1	1	1
HAYS3JFT2-1	Broiler faeces	Chicken	Farm	Henan 3	Henan	k119_65873	HAYS3JFT2-1_l500.fa-k119_65873	IS15DII_IS6_unknown	AAC(3)-IIe	IS15DII_IS6_unknown-AAC(3)-IIe	44	1	1	1	1
LNPCJFT2_13	Broiler faeces	Chicken	Farm	Liaoning 1	Liaoning	k119_5827	LNPCJFT2_13_l500.fa-k119_5827	IS15DII_IS6_unknown	AAC(3)-IIe	IS15DII_IS6_unknown-AAC(3)-IIe	44	1	1	1	1
PDJFT1S3L0101	Broiler faeces	Chicken	Farm	Shandong 1_1	Shandong	k119_276902	PDJFT1S3L0101_l500.fa-k119_276902	IS15DII_IS6_unknown	AAC(3)-IIe	IS15DII_IS6_unknown-AAC(3)-IIe	44	1	1	1	1
PDJFT1S3L0609	Broiler faeces	Chicken	Farm	Shandong 1_1	Shandong	k119_199086	PDJFT1S3L0609_l500.fa-k119_199086	IS15DII_IS6_unknown	AAC(3)-IIe	IS15DII_IS6_unknown-AAC(3)-IIe	44	1	1	1	1
PDJFT1S4L0212	Broiler faeces	Chicken	Farm	Shandong 1_1	Shandong	k119_250923	PDJFT1S4L0212_l500.fa-k119_250923	IS15DII_IS6_unknown	AAC(3)-IIe	IS15DII_IS6_unknown-AAC(3)-IIe	44	1	1	1	1
PDJFT1S4L0313	Broiler faeces	Chicken	Farm	Shandong 1_1	Shandong	k119_15318	PDJFT1S4L0313_l500.fa-k119_15318	IS15DII_IS6_unknown	AAC(3)-IIe	IS15DII_IS6_unknown-AAC(3)-IIe	44	1	1	1	1
PDJFT1S4L0515	Broiler faeces	Chicken	Farm	Shandong 1_1	Shandong	k119_7037	PDJFT1S4L0515_l500.fa-k119_7037	IS15DII_IS6_unknown	AAC(3)-IIe	IS15DII_IS6_unknown-AAC(3)-IIe	44	1	1	1	1
PDJFT1S4L0616	Broiler faeces	Chicken	Farm	Shandong 1_1	Shandong	k119_234514	PDJFT1S4L0616_l500.fa-k119_234514	IS15DII_IS6_unknown	AAC(3)-IIe	IS15DII_IS6_unknown-AAC(3)-IIe	44	1	1	1	1
SDPD1JFT1.14	Broiler faeces	Chicken	Farm	Shandong 2	Shandong	k119_290643	SDPD1JFT1.14_l500.fa-k119_290643	IS15DII_IS6_unknown	AAC(3)-IIe	IS15DII_IS6_unknown-AAC(3)-IIe	44	1	1	1	1
LNLDJFT2-19	Broiler faeces	Chicken	Farm	Liaoning 3	Liaoning	k119_550430	LNLDJFT2-19_l500.fa-k119_550430	ISAlw25_IS1_unknown	dfrA1	ISAlw25_IS1_unknown-dfrA1	3144	1	1	1	1
LNLDJFT2-06	Broiler faeces	Chicken	Farm	Liaoning 3	Liaoning	k119_294435	LNLDJFT2-06_l500.fa-k119_294435	ISAlw25_IS1_unknown	dfrA1	ISAlw25_IS1_unknown-dfrA1	3144	1	1	1	1
LNLDJFT2-11	Broiler faeces	Chicken	Farm	Liaoning 3	Liaoning	k119_64518	LNLDJFT2-11_l500.fa-k119_64518	ISAlw25_IS1_unknown	dfrA1	ISAlw25_IS1_unknown-dfrA1	3144	1	1	1	1
HAYS1JFT1-6	Broiler faeces	Chicken	Farm	Henan 1	Henan	k119_185878	HAYS1JFT1-6_l500.fa-k119_185878	ISCfr1_IS1182_unknown	AAC(3)-IIe	ISCfr1_IS1182_unknown-AAC(3)-IIe	2989	1	1	1	1
SDPD3HCT2-01	Barn Floor	Environment	Farm	Shandong 3	Shandong	k119_745153	SDPD3HCT2-01_l500.fa-k119_745153	ISCfr1_IS1182_unknown	AAC(3)-IIe	ISCfr1_IS1182_unknown-AAC(3)-IIe	964	1	1	1	1
SDPD4JFT2-01	Broiler faeces	Chicken	Farm	Shandong 4	Shandong	k119_320191	SDPD4JFT2-01_l500.fa-k119_320191	ISCfr1_IS1182_unknown	AAC(3)-IIe	ISCfr1_IS1182_unknown-AAC(3)-IIe	2700	1	1	1	1
SDPD4JFT2-13	Broiler faeces	Chicken	Farm	Shandong 4	Shandong	k119_661687	SDPD4JFT2-13_l500.fa-k119_661687	ISCfr1_IS1182_unknown	AAC(3)-IIe	ISCfr1_IS1182_unknown-AAC(3)-IIe	2700	1	1	1	1
SDPD4JFT2-05	Broiler faeces	Chicken	Farm	Shandong 4	Shandong	k119_630315	SDPD4JFT2-05_l500.fa-k119_630315	ISCfr1_IS1182_unknown	AAC(3)-IIe	ISCfr1_IS1182_unknown-AAC(3)-IIe	2700	1	1	1	1
SDPD4JFT1-05	Broiler faeces	Chicken	Farm	Shandong 4	Shandong	k119_453574	SDPD4JFT1-05_l500.fa-k119_453574	ISCfr1_IS1182_unknown	AAC(3)-IIe	ISCfr1_IS1182_unknown-AAC(3)-IIe	2989	1	1	1	1
SDPD4JFT1-18	Broiler faeces	Chicken	Farm	Shandong 4	Shandong	k119_238392	SDPD4JFT1-18_l500.fa-k119_238392	ISCfr1_IS1182_unknown	AAC(3)-IIe	ISCfr1_IS1182_unknown-AAC(3)-IIe	2989	1	1	1	1
LNPCTRT2_03	Soil	Environment	Farm	Liaoning 1	Liaoning	k119_1248525	LNPCTRT2_03_l500.fa-k119_1248525	ISKpn12_IS5_IS427	AAC(3)-IIe	ISKpn12_IS5_IS427-AAC(3)-IIe	221	1	1	1	1
SDPD3HCT2-01	Barn Floor	Environment	Farm	Shandong 3	Shandong	k119_745153	SDPD3HCT2-01_l500.fa-k119_745153	ISKpn12_IS5_IS427	AAC(3)-IIe	ISKpn12_IS5_IS427-AAC(3)-IIe	2443	1	1	1	1
SDPD4JFT1-18	Broiler faeces	Chicken	Farm	Shandong 4	Shandong	k119_238392	SDPD4JFT1-18_l500.fa-k119_238392	ISKpn12_IS5_IS427	AAC(3)-IIe	ISKpn12_IS5_IS427-AAC(3)-IIe	221	1	1	1	1
PDJFT1S3L0610	Broiler faeces	Chicken	Farm	Shandong 1_1	Shandong	k119_118294	PDJFT1S3L0610_l500.fa-k119_118294	ISKpn26_IS5_IS5	dfrA1	ISKpn26_IS5_IS5-dfrA1	3301	1	1	1	1
PDJFT1S3L0101	Broiler faeces	Chicken	Farm	Shandong 1_1	Shandong	k119_91336	PDJFT1S3L0101_l500.fa-k119_91336	ISKpn26_IS5_IS5	dfrA1	ISKpn26_IS5_IS5-dfrA1	3301	1	1	1	1
PDJFT1S3L0202	Broiler faeces	Chicken	Farm	Shandong 1_1	Shandong	k119_425393	PDJFT1S3L0202_l500.fa-k119_425393	ISKpn26_IS5_IS5	dfrA1	ISKpn26_IS5_IS5-dfrA1	3301	1	1	1	1
PDJFT1S3L0303	Broiler faeces	Chicken	Farm	Shandong 1_1	Shandong	k119_11089	PDJFT1S3L0303_l500.fa-k119_11089	ISKpn26_IS5_IS5	dfrA1	ISKpn26_IS5_IS5-dfrA1	3301	1	1	1	1
PDJFT1S3L0507	Broiler faeces	Chicken	Farm	Shandong 1_1	Shandong	k119_36389	PDJFT1S3L0507_l500.fa-k119_36389	ISKpn26_IS5_IS5	dfrA1	ISKpn26_IS5_IS5-dfrA1	3301	1	1	1	1
PDJFT1S3L0609	Broiler faeces	Chicken	Farm	Shandong 1_1	Shandong	k119_27952	PDJFT1S3L0609_l500.fa-k119_27952	ISKpn26_IS5_IS5	dfrA1	ISKpn26_IS5_IS5-dfrA1	3301	1	1	1	1
PDJFT1S4L0819	Broiler faeces	Chicken	Farm	Shandong 1_1	Shandong	k119_88301	PDJFT1S4L0819_l500.fa-k119_88301	ISKpn26_IS5_IS5	dfrA1	ISKpn26_IS5_IS5-dfrA1	3301	1	1	1	1
PDJFT1S3L0508	Broiler faeces	Chicken	Farm	Shandong 1_1	Shandong	k119_233726	PDJFT1S3L0508_l500.fa-k119_233726	ISKpn26_IS5_IS5	dfrA1	ISKpn26_IS5_IS5-dfrA1	3301	1	1	1	1
SDPD4HCT1-01	Barn Floor	Environment	Farm	Shandong 4	Shandong	k119_1248538	SDPD4HCT1-01_l500.fa-k119_1248538	ISPa25_IS110_IS1111	catB2	ISPa25_IS110_IS1111-catB2	889	1	1	1	1
SDPD4JFT1-13	Broiler faeces	Chicken	Farm	Shandong 4	Shandong	k119_926554	SDPD4JFT1-13_l500.fa-k119_926554	ISPa25_IS110_IS1111	catB2	ISPa25_IS110_IS1111-catB2	889	1	1	1	1
SDPD4JFT1-15	Broiler faeces	Chicken	Farm	Shandong 4	Shandong	k119_40792	SDPD4JFT1-15_l500.fa-k119_40792	ISPa25_IS110_IS1111	catB2	ISPa25_IS110_IS1111-catB2	889	1	1	1	1
SDPD4JFT1-05	Broiler faeces	Chicken	Farm	Shandong 4	Shandong	k119_217000	SDPD4JFT1-05_l500.fa-k119_217000	ISPa25_IS110_IS1111	catB2	ISPa25_IS110_IS1111-catB2	889	1	1	1	1
SDPD4TRT1-01	Soil	Environment	Farm	Shandong 4	Shandong	k119_938541	SDPD4TRT1-01_l500.fa-k119_938541	ISPa25_IS110_IS1111	catB2	ISPa25_IS110_IS1111-catB2	889	1	1	1	1
HAYS1JFT1-2	Broiler faeces	Chicken	Farm	Henan 1	Henan	k119_112780	HAYS1JFT1-2_l500.fa-k119_112780	IS102_IS5_IS903	CTX-M-24	IS102_IS5_IS903-CTX-M-24	6	1	1	1	0
HAYS1JFT1-5	Broiler faeces	Chicken	Farm	Henan 1	Henan	k119_104033	HAYS1JFT1-5_l500.fa-k119_104033	IS102_IS5_IS903	CTX-M-24	IS102_IS5_IS903-CTX-M-24	6	1	1	1	0
HAYS2JFT1-8	Broiler faeces	Chicken	Farm	Henan 2	Henan	k119_16158	HAYS2JFT1-8_l500.fa-k119_16158	IS102_IS5_IS903	CTX-M-24	IS102_IS5_IS903-CTX-M-24	6	1	1	1	0
HAYS2YMT1-3	Broiler Feather	Chicken	Farm	Henan 2	Henan	k119_135227	HAYS2YMT1-3_l500.fa-k119_135227	IS102_IS5_IS903	CTX-M-24	IS102_IS5_IS903-CTX-M-24	6	1	1	1	0
HAYS2YMT2-2	Broiler Feather	Chicken	Farm	Henan 2	Henan	k119_253601	HAYS2YMT2-2_l500.fa-k119_253601	IS102_IS5_IS903	CTX-M-24	IS102_IS5_IS903-CTX-M-24	6	1	1	1	0
LNPCJFT1_18	Broiler faeces	Chicken	Farm	Liaoning 1	Liaoning	k119_35035	LNPCJFT1_18_l500.fa-k119_35035	IS102_IS5_IS903	CTX-M-24	IS102_IS5_IS903-CTX-M-24	6	1	1	1	0
LNPCJFT2_01	Broiler faeces	Chicken	Farm	Liaoning 1	Liaoning	k119_1083880	LNPCJFT2_01_l500.fa-k119_1083880	IS102_IS5_IS903	CTX-M-24	IS102_IS5_IS903-CTX-M-24	6	1	1	1	0
LNPCJFT2_02	Broiler faeces	Chicken	Farm	Liaoning 1	Liaoning	k119_420675	LNPCJFT2_02_l500.fa-k119_420675	IS102_IS5_IS903	CTX-M-24	IS102_IS5_IS903-CTX-M-24	6	1	1	1	0
LNPCJFT2_10	Broiler faeces	Chicken	Farm	Liaoning 1	Liaoning	k119_561283	LNPCJFT2_10_l500.fa-k119_561283	IS102_IS5_IS903	CTX-M-24	IS102_IS5_IS903-CTX-M-24	6	1	1	1	0
LNTPJFT2_01	Broiler faeces	Chicken	Farm	Liaoning 2	Liaoning	k119_499474	LNTPJFT2_01_l500.fa-k119_499474	IS102_IS5_IS903	CTX-M-24	IS102_IS5_IS903-CTX-M-24	6	1	1	1	0
SDPD1JTT3.14	Broiler carcass	Chicken	Slaughterhouse	Shandong 2	Shandong	k119_190473	SDPD1JTT3.14_l500.fa-k119_190473	IS102_IS5_IS903	CTX-M-24	IS102_IS5_IS903-CTX-M-24	6	1	1	1	0
SDPD1JFT1.09	Broiler faeces	Chicken	Farm	Shandong 2	Shandong	k119_85007	SDPD1JFT1.09_l500.fa-k119_85007	IS102_IS5_IS903	CTX-M-24	IS102_IS5_IS903-CTX-M-24	6	1	1	1	0
SDPD1JFT1.05	Broiler faeces	Chicken	Farm	Shandong 2	Shandong	k119_183454	SDPD1JFT1.05_l500.fa-k119_183454	IS102_IS5_IS903	CTX-M-24	IS102_IS5_IS903-CTX-M-24	6	1	1	1	0
SDPD3JFT1-13	Broiler faeces	Chicken	Farm	Shandong 3	Shandong	k119_142397	SDPD3JFT1-13_l500.fa-k119_142397	IS102_IS5_IS903	CTX-M-24	IS102_IS5_IS903-CTX-M-24	6	1	1	1	0
SDPD4JFT1-05	Broiler faeces	Chicken	Farm	Shandong 4	Shandong	k119_802447	SDPD4JFT1-05_l500.fa-k119_802447	IS102_IS5_IS903	CTX-M-24	IS102_IS5_IS903-CTX-M-24	6	1	1	1	0
SDPD4JFT2-17	Broiler faeces	Chicken	Farm	Shandong 4	Shandong	k119_859920	SDPD4JFT2-17_l500.fa-k119_859920	IS102_IS5_IS903	CTX-M-24	IS102_IS5_IS903-CTX-M-24	6	1	1	1	0
SDPD4YMT1-01	Broiler Feather	Chicken	Farm	Shandong 4	Shandong	k119_138852	SDPD4YMT1-01_l500.fa-k119_138852	IS102_IS5_IS903	CTX-M-24	IS102_IS5_IS903-CTX-M-24	6	1	1	1	0
SDPD4YMT1-04	Broiler Feather	Chicken	Farm	Shandong 4	Shandong	k119_913926	SDPD4YMT1-04_l500.fa-k119_913926	IS102_IS5_IS903	CTX-M-24	IS102_IS5_IS903-CTX-M-24	6	1	1	1	0
LNPCJFT2_05	Broiler faeces	Chicken	Farm	Liaoning 1	Liaoning	k119_346125	LNPCJFT2_05_l500.fa-k119_346125	IS102_IS5_IS903	CTX-M-55	IS102_IS5_IS903-CTX-M-55	4101	1	1	1	0
LNPCJFT2_18	Broiler faeces	Chicken	Farm	Liaoning 1	Liaoning	k119_93557	LNPCJFT2_18_l500.fa-k119_93557	IS102_IS5_IS903	CTX-M-55	IS102_IS5_IS903-CTX-M-55	4101	1	1	1	0
PDJFL2A2	Broiler faeces	Chicken	Farm	Shandong 1_2	Shandong	k119_46254	PDJFL2A2_l500.fa-k119_46254	IS1168_IS5_IS5	CfxA3	IS1168_IS5_IS5-CfxA3	98	0	1	1	1
PDJFL2C1	Broiler faeces	Chicken	Farm	Shandong 1_2	Shandong	k119_243076	PDJFL2C1_l500.fa-k119_243076	IS1168_IS5_IS5	CfxA3	IS1168_IS5_IS5-CfxA3	98	0	1	1	1
PDJFL2C5	Broiler faeces	Chicken	Farm	Shandong 1_2	Shandong	k119_141929	PDJFL2C5_l500.fa-k119_141929	IS1168_IS5_IS5	CfxA3	IS1168_IS5_IS5-CfxA3	98	0	1	1	1
LNPCJFT2_02	Broiler faeces	Chicken	Farm	Liaoning 1	Liaoning	k119_331921	LNPCJFT2_02_l500.fa-k119_331921	IS1169_IS5_IS5	CfxA3	IS1169_IS5_IS5-CfxA3	604	0	1	1	1
LNPCJFT2_05	Broiler faeces	Chicken	Farm	Liaoning 1	Liaoning	k119_122535	LNPCJFT2_05_l500.fa-k119_122535	IS1169_IS5_IS5	CfxA3	IS1169_IS5_IS5-CfxA3	604	0	1	1	1
LNPCJFT2_07	Broiler faeces	Chicken	Farm	Liaoning 1	Liaoning	k119_36851	LNPCJFT2_07_l500.fa-k119_36851	IS1169_IS5_IS5	CfxA3	IS1169_IS5_IS5-CfxA3	604	0	1	1	1
LNPCJFT2_09	Broiler faeces	Chicken	Farm	Liaoning 1	Liaoning	k119_219546	LNPCJFT2_09_l500.fa-k119_219546	IS1169_IS5_IS5	CfxA3	IS1169_IS5_IS5-CfxA3	604	0	1	1	1
LNPCJFT2_19	Broiler faeces	Chicken	Farm	Liaoning 1	Liaoning	k119_45993	LNPCJFT2_19_l500.fa-k119_45993	IS1169_IS5_IS5	CfxA3	IS1169_IS5_IS5-CfxA3	604	0	1	1	1
PDJFT2S3L0405	Broiler faeces	Chicken	Farm	Shandong 1_1	Shandong	k119_52044	PDJFT2S3L0405_l500.fa-k119_52044	IS1169_IS5_IS5	CfxA3	IS1169_IS5_IS5-CfxA3	16	0	1	1	1
PDJFT2S3L0610	Broiler faeces	Chicken	Farm	Shandong 1_1	Shandong	k119_10501	PDJFT2S3L0610_l500.fa-k119_10501	IS1169_IS5_IS5	CfxA3	IS1169_IS5_IS5-CfxA3	16	0	1	1	1
PDJFT2S3L0507	Broiler faeces	Chicken	Farm	Shandong 1_1	Shandong	k119_109856	PDJFT2S3L0507_l500.fa-k119_109856	IS1169_IS5_IS5	CfxA3	IS1169_IS5_IS5-CfxA3	604	0	1	1	1
PDJFT2S3L0508	Broiler faeces	Chicken	Farm	Shandong 1_1	Shandong	k119_189609	PDJFT2S3L0508_l500.fa-k119_189609	IS1169_IS5_IS5	CfxA3	IS1169_IS5_IS5-CfxA3	604	0	1	1	1
HAYS3JFT2-2	Broiler faeces	Chicken	Farm	Henan 3	Henan	k119_129128	HAYS3JFT2-2_l500.fa-k119_129128	IS1187_IS982_unknown	CfxA2	IS1187_IS982_unknown-CfxA2	1684	0	1	1	1
HAYS3YMT1-04	Broiler Feather	Chicken	Farm	Henan 3	Henan	k119_512465	HAYS3YMT1-04_l500.fa-k119_512465	IS1187_IS982_unknown	CfxA2	IS1187_IS982_unknown-CfxA2	86	0	1	1	1
LNTPJFT2_17	Broiler faeces	Chicken	Farm	Liaoning 2	Liaoning	k119_135058	LNTPJFT2_17_l500.fa-k119_135058	IS1187_IS982_unknown	CfxA2	IS1187_IS982_unknown-CfxA2	86	0	1	1	1
SDPD1JTT3.13	Broiler carcass	Chicken	Slaughterhouse	Shandong 2	Shandong	k119_133449	SDPD1JTT3.13_l500.fa-k119_133449	IS1187_IS982_unknown	CfxA2	IS1187_IS982_unknown-CfxA2	86	0	1	1	1
SDPD4JFT2-03	Broiler faeces	Chicken	Farm	Shandong 4	Shandong	k119_459063	SDPD4JFT2-03_l500.fa-k119_459063	IS1187_IS982_unknown	CfxA2	IS1187_IS982_unknown-CfxA2	86	0	1	1	1
HAYS3JFT2-15	Broiler faeces	Chicken	Farm	Henan 3	Henan	k119_224295	HAYS3JFT2-15_l500.fa-k119_224295	IS1187_IS982_unknown	CfxA3	IS1187_IS982_unknown-CfxA3	1684	0	1	1	1
HAYS3JFT2-9	Broiler faeces	Chicken	Farm	Henan 3	Henan	k119_107556	HAYS3JFT2-9_l500.fa-k119_107556	IS1187_IS982_unknown	CfxA3	IS1187_IS982_unknown-CfxA3	1684	0	1	1	1
HAYS3YMT2-5	Broiler Feather	Chicken	Farm	Henan 3	Henan	k119_368851	HAYS3YMT2-5_l500.fa-k119_368851	IS1187_IS982_unknown	CfxA3	IS1187_IS982_unknown-CfxA3	1684	0	1	1	1
LNPCDMT2_01	Barn Floor	Environment	Farm	Liaoning 1	Liaoning	k119_939693	LNPCDMT2_01_l500.fa-k119_939693	IS1187_IS982_unknown	CfxA3	IS1187_IS982_unknown-CfxA3	86	0	1	1	1
LNPCJFT2_01	Broiler faeces	Chicken	Farm	Liaoning 1	Liaoning	k119_864552	LNPCJFT2_01_l500.fa-k119_864552	IS1187_IS982_unknown	CfxA3	IS1187_IS982_unknown-CfxA3	86	0	1	1	1
LNTPDMT2_03	Barn Floor	Environment	Farm	Liaoning 2	Liaoning	k119_549065	LNTPDMT2_03_l500.fa-k119_549065	IS1187_IS982_unknown	CfxA3	IS1187_IS982_unknown-CfxA3	86	0	1	1	1
LNTPJFT1_06	Broiler faeces	Chicken	Farm	Liaoning 2	Liaoning	k119_137215	LNTPJFT1_06_l500.fa-k119_137215	IS1187_IS982_unknown	CfxA3	IS1187_IS982_unknown-CfxA3	86	0	1	1	1
LNTPJFT1_14	Broiler faeces	Chicken	Farm	Liaoning 2	Liaoning	k119_220338	LNTPJFT1_14_l500.fa-k119_220338	IS1187_IS982_unknown	CfxA3	IS1187_IS982_unknown-CfxA3	86	0	1	1	1
LNTPJFT1_16	Broiler faeces	Chicken	Farm	Liaoning 2	Liaoning	k119_352088	LNTPJFT1_16_l500.fa-k119_352088	IS1187_IS982_unknown	CfxA3	IS1187_IS982_unknown-CfxA3	86	0	1	1	1
LNTPJFT2_01	Broiler faeces	Chicken	Farm	Liaoning 2	Liaoning	k119_323821	LNTPJFT2_01_l500.fa-k119_323821	IS1187_IS982_unknown	CfxA3	IS1187_IS982_unknown-CfxA3	86	0	1	1	1
LNTPJFT2_11	Broiler faeces	Chicken	Farm	Liaoning 2	Liaoning	k119_178085	LNTPJFT2_11_l500.fa-k119_178085	IS1187_IS982_unknown	CfxA3	IS1187_IS982_unknown-CfxA3	86	0	1	1	1
LNTPJFT2_15	Broiler faeces	Chicken	Farm	Liaoning 2	Liaoning	k119_126241	LNTPJFT2_15_l500.fa-k119_126241	IS1187_IS982_unknown	CfxA3	IS1187_IS982_unknown-CfxA3	86	0	1	1	1
SDPD1JTT3.06	Broiler carcass	Chicken	Slaughterhouse	Shandong 2	Shandong	k119_133224	SDPD1JTT3.06_l500.fa-k119_133224	IS1187_IS982_unknown	CfxA3	IS1187_IS982_unknown-CfxA3	86	0	1	1	1
SDPD1JTT3.07	Broiler carcass	Chicken	Slaughterhouse	Shandong 2	Shandong	k119_149475	SDPD1JTT3.07_l500.fa-k119_149475	IS1187_IS982_unknown	CfxA3	IS1187_IS982_unknown-CfxA3	86	0	1	1	1
SDPD1JTT3.10	Broiler carcass	Chicken	Slaughterhouse	Shandong 2	Shandong	k119_25627	SDPD1JTT3.10_l500.fa-k119_25627	IS1187_IS982_unknown	CfxA3	IS1187_IS982_unknown-CfxA3	86	0	1	1	1
SDPD1JFT2.13	Broiler faeces	Chicken	Farm	Shandong 2	Shandong	k119_394672	SDPD1JFT2.13_l500.fa-k119_394672	IS1187_IS982_unknown	CfxA3	IS1187_IS982_unknown-CfxA3	86	0	1	1	1
SDPD1JFT2.01	Broiler faeces	Chicken	Farm	Shandong 2	Shandong	k119_277873	SDPD1JFT2.01_l500.fa-k119_277873	IS1187_IS982_unknown	CfxA3	IS1187_IS982_unknown-CfxA3	1684	0	1	1	1
SDPD4HCT2-01	Barn Floor	Environment	Farm	Shandong 4	Shandong	k119_212845	SDPD4HCT2-01_l500.fa-k119_212845	IS1187_IS982_unknown	CfxA3	IS1187_IS982_unknown-CfxA3	86	0	1	1	1
SDPD4HCT2-02	Barn Floor	Environment	Farm	Shandong 4	Shandong	k119_744326	SDPD4HCT2-02_l500.fa-k119_744326	IS1187_IS982_unknown	CfxA3	IS1187_IS982_unknown-CfxA3	86	0	1	1	1
HAYS1JFT2-8	Broiler faeces	Chicken	Farm	Henan 1	Henan	k119_217477	HAYS1JFT2-8_l500.fa-k119_217477	IS1216_IS6_unknown	catA8	IS1216_IS6_unknown-catA8	570	1	1	1	0
LNPCJFT1_08	Broiler faeces	Chicken	Farm	Liaoning 1	Liaoning	k119_689282	LNPCJFT1_08_l500.fa-k119_689282	IS1216_IS6_unknown	catA8	IS1216_IS6_unknown-catA8	923	1	1	1	0
LNPCJFT1_03	Broiler faeces	Chicken	Farm	Liaoning 1	Liaoning	k119_1052574	LNPCJFT1_03_l500.fa-k119_1052574	IS1216_IS6_unknown	catA8	IS1216_IS6_unknown-catA8	1333	1	1	1	0
LNLDJFT2-15	Broiler faeces	Chicken	Farm	Liaoning 3	Liaoning	k119_170710	LNLDJFT2-15_l500.fa-k119_170710	IS1216_IS6_unknown	catA8	IS1216_IS6_unknown-catA8	570	1	1	1	0
LNLDJFT2-02	Broiler faeces	Chicken	Farm	Liaoning 3	Liaoning	k119_710993	LNLDJFT2-02_l500.fa-k119_710993	IS1216_IS6_unknown	catA8	IS1216_IS6_unknown-catA8	1309	1	1	1	0
PDJFL1C2	Broiler faeces	Chicken	Farm	Shandong 1_2	Shandong	k119_226427	PDJFL1C2_l500.fa-k119_226427	IS1216_IS6_unknown	catA8	IS1216_IS6_unknown-catA8	570	1	1	1	0
SDPD1JFT1.14	Broiler faeces	Chicken	Farm	Shandong 2	Shandong	k119_87538	SDPD1JFT1.14_l500.fa-k119_87538	IS1216_IS6_unknown	catA8	IS1216_IS6_unknown-catA8	570	1	1	1	0
SDPD1JFT1.06	Broiler faeces	Chicken	Farm	Shandong 2	Shandong	k119_332785	SDPD1JFT1.06_l500.fa-k119_332785	IS1216_IS6_unknown	catA8	IS1216_IS6_unknown-catA8	570	1	1	1	0
SDPD1JFT1.07	Broiler faeces	Chicken	Farm	Shandong 2	Shandong	k119_310288	SDPD1JFT1.07_l500.fa-k119_310288	IS1216_IS6_unknown	catA8	IS1216_IS6_unknown-catA8	570	1	1	1	0
SDPD4JFT2-07	Broiler faeces	Chicken	Farm	Shandong 4	Shandong	k119_75827	SDPD4JFT2-07_l500.fa-k119_75827	IS1216_IS6_unknown	catA8	IS1216_IS6_unknown-catA8	570	1	1	1	0
HAYS1JFT1-4	Broiler faeces	Chicken	Farm	Henan 1	Henan	k119_57904	HAYS1JFT1-4_l500.fa-k119_57904	IS1216_IS6_unknown	ErmC	IS1216_IS6_unknown-ErmC	74	1	1	1	0
HAYS1JFT2-5	Broiler faeces	Chicken	Farm	Henan 1	Henan	k119_216573	HAYS1JFT2-5_l500.fa-k119_216573	IS1216_IS6_unknown	ErmC	IS1216_IS6_unknown-ErmC	74	1	1	1	0
HAYS1JFT2-6	Broiler faeces	Chicken	Farm	Henan 1	Henan	k119_67823	HAYS1JFT2-6_l500.fa-k119_67823	IS1216_IS6_unknown	ErmC	IS1216_IS6_unknown-ErmC	74	1	1	1	0
HAYS1JFT2-7	Broiler faeces	Chicken	Farm	Henan 1	Henan	k119_849961	HAYS1JFT2-7_l500.fa-k119_849961	IS1216_IS6_unknown	ErmC	IS1216_IS6_unknown-ErmC	74	1	1	1	0
HAYS1JFT2-4	Broiler faeces	Chicken	Farm	Henan 1	Henan	k119_17359	HAYS1JFT2-4_l500.fa-k119_17359	IS1216_IS6_unknown	ErmC	IS1216_IS6_unknown-ErmC	182	1	1	1	0
HAYS2JFT1-11	Broiler faeces	Chicken	Farm	Henan 2	Henan	k119_408416	HAYS2JFT1-11_l500.fa-k119_408416	IS1216_IS6_unknown	ErmC	IS1216_IS6_unknown-ErmC	74	1	1	1	0
HAYS2JFT1-8	Broiler faeces	Chicken	Farm	Henan 2	Henan	k119_353005	HAYS2JFT1-8_l500.fa-k119_353005	IS1216_IS6_unknown	ErmC	IS1216_IS6_unknown-ErmC	74	1	1	1	0
HAYS2JFT2-11	Broiler faeces	Chicken	Farm	Henan 2	Henan	k119_30671	HAYS2JFT2-11_l500.fa-k119_30671	IS1216_IS6_unknown	ErmC	IS1216_IS6_unknown-ErmC	74	1	1	1	0
HAYS2JFT2-15	Broiler faeces	Chicken	Farm	Henan 2	Henan	k119_1561	HAYS2JFT2-15_l500.fa-k119_1561	IS1216_IS6_unknown	ErmC	IS1216_IS6_unknown-ErmC	74	1	1	1	0
HAYS2JFT2-8	Broiler faeces	Chicken	Farm	Henan 2	Henan	k119_390865	HAYS2JFT2-8_l500.fa-k119_390865	IS1216_IS6_unknown	ErmC	IS1216_IS6_unknown-ErmC	74	1	1	1	0
HAYS2JFT1-12	Broiler faeces	Chicken	Farm	Henan 2	Henan	k119_168072	HAYS2JFT1-12_l500.fa-k119_168072	IS1216_IS6_unknown	ErmC	IS1216_IS6_unknown-ErmC	182	1	1	1	0
HAYS2JFT2-14	Broiler faeces	Chicken	Farm	Henan 2	Henan	k119_511622	HAYS2JFT2-14_l500.fa-k119_511622	IS1216_IS6_unknown	ErmC	IS1216_IS6_unknown-ErmC	760	1	1	1	0
HAYS2YMT2-1	Broiler Feather	Chicken	Farm	Henan 2	Henan	k119_236104	HAYS2YMT2-1_l500.fa-k119_236104	IS1216_IS6_unknown	ErmC	IS1216_IS6_unknown-ErmC	74	1	1	1	0
HAYS2YMT2-2	Broiler Feather	Chicken	Farm	Henan 2	Henan	k119_1213818	HAYS2YMT2-2_l500.fa-k119_1213818	IS1216_IS6_unknown	ErmC	IS1216_IS6_unknown-ErmC	74	1	1	1	0
HAYS2YMT2-4	Broiler Feather	Chicken	Farm	Henan 2	Henan	k119_104643	HAYS2YMT2-4_l500.fa-k119_104643	IS1216_IS6_unknown	ErmC	IS1216_IS6_unknown-ErmC	74	1	1	1	0
HAYS2YMT2-5	Broiler Feather	Chicken	Farm	Henan 2	Henan	k119_483526	HAYS2YMT2-5_l500.fa-k119_483526	IS1216_IS6_unknown	ErmC	IS1216_IS6_unknown-ErmC	74	1	1	1	0
HAYS3HCT2-2	Barn Floor	Environment	Farm	Henan 3	Henan	k119_343984	HAYS3HCT2-2_l500.fa-k119_343984	IS1216_IS6_unknown	ErmC	IS1216_IS6_unknown-ErmC	74	1	1	1	0
HAYS3JFT1-1	Broiler faeces	Chicken	Farm	Henan 3	Henan	k119_24436	HAYS3JFT1-1_l500.fa-k119_24436	IS1216_IS6_unknown	ErmC	IS1216_IS6_unknown-ErmC	74	1	1	1	0
HAYS3JFT1-11	Broiler faeces	Chicken	Farm	Henan 3	Henan	k119_51453	HAYS3JFT1-11_l500.fa-k119_51453	IS1216_IS6_unknown	ErmC	IS1216_IS6_unknown-ErmC	74	1	1	1	0
HAYS3JFT1-13	Broiler faeces	Chicken	Farm	Henan 3	Henan	k119_41036	HAYS3JFT1-13_l500.fa-k119_41036	IS1216_IS6_unknown	ErmC	IS1216_IS6_unknown-ErmC	74	1	1	1	0
HAYS3JFT1-4	Broiler faeces	Chicken	Farm	Henan 3	Henan	k119_23526	HAYS3JFT1-4_l500.fa-k119_23526	IS1216_IS6_unknown	ErmC	IS1216_IS6_unknown-ErmC	74	1	1	1	0
HAYS3JFT1-7	Broiler faeces	Chicken	Farm	Henan 3	Henan	k119_144183	HAYS3JFT1-7_l500.fa-k119_144183	IS1216_IS6_unknown	ErmC	IS1216_IS6_unknown-ErmC	74	1	1	1	0
HAYS3JFT1-9	Broiler faeces	Chicken	Farm	Henan 3	Henan	k119_13024	HAYS3JFT1-9_l500.fa-k119_13024	IS1216_IS6_unknown	ErmC	IS1216_IS6_unknown-ErmC	74	1	1	1	0
HAYS3JFT2-11	Broiler faeces	Chicken	Farm	Henan 3	Henan	k119_217177	HAYS3JFT2-11_l500.fa-k119_217177	IS1216_IS6_unknown	ErmC	IS1216_IS6_unknown-ErmC	74	1	1	1	0
HAYS3JFT2-12	Broiler faeces	Chicken	Farm	Henan 3	Henan	k119_534	HAYS3JFT2-12_l500.fa-k119_534	IS1216_IS6_unknown	ErmC	IS1216_IS6_unknown-ErmC	74	1	1	1	0
HAYS3JFT2-13	Broiler faeces	Chicken	Farm	Henan 3	Henan	k119_82921	HAYS3JFT2-13_l500.fa-k119_82921	IS1216_IS6_unknown	ErmC	IS1216_IS6_unknown-ErmC	74	1	1	1	0
HAYS3JFT2-14	Broiler faeces	Chicken	Farm	Henan 3	Henan	k119_5180	HAYS3JFT2-14_l500.fa-k119_5180	IS1216_IS6_unknown	ErmC	IS1216_IS6_unknown-ErmC	74	1	1	1	0
HAYS3JFT2-15	Broiler faeces	Chicken	Farm	Henan 3	Henan	k119_393522	HAYS3JFT2-15_l500.fa-k119_393522	IS1216_IS6_unknown	ErmC	IS1216_IS6_unknown-ErmC	74	1	1	1	0
HAYS3JFT2-4	Broiler faeces	Chicken	Farm	Henan 3	Henan	k119_350551	HAYS3JFT2-4_l500.fa-k119_350551	IS1216_IS6_unknown	ErmC	IS1216_IS6_unknown-ErmC	74	1	1	1	0
HAYS3JFT2-8	Broiler faeces	Chicken	Farm	Henan 3	Henan	k119_284791	HAYS3JFT2-8_l500.fa-k119_284791	IS1216_IS6_unknown	ErmC	IS1216_IS6_unknown-ErmC	74	1	1	1	0
HAYS3JFT2-9	Broiler faeces	Chicken	Farm	Henan 3	Henan	k119_40307	HAYS3JFT2-9_l500.fa-k119_40307	IS1216_IS6_unknown	ErmC	IS1216_IS6_unknown-ErmC	74	1	1	1	0
HAYS3JFT2-7	Broiler faeces	Chicken	Farm	Henan 3	Henan	k119_48586	HAYS3JFT2-7_l500.fa-k119_48586	IS1216_IS6_unknown	ErmC	IS1216_IS6_unknown-ErmC	74	1	1	1	0
HAYS3JFT1-8	Broiler faeces	Chicken	Farm	Henan 3	Henan	k119_1322175	HAYS3JFT1-8_l500.fa-k119_1322175	IS1216_IS6_unknown	ErmC	IS1216_IS6_unknown-ErmC	74	1	1	1	0
HAYS3JFT2-2	Broiler faeces	Chicken	Farm	Henan 3	Henan	k119_167432	HAYS3JFT2-2_l500.fa-k119_167432	IS1216_IS6_unknown	ErmC	IS1216_IS6_unknown-ErmC	182	1	1	1	0
HAYS3JFT1-15	Broiler faeces	Chicken	Farm	Henan 3	Henan	k119_132282	HAYS3JFT1-15_l500.fa-k119_132282	IS1216_IS6_unknown	ErmC	IS1216_IS6_unknown-ErmC	1095	1	1	1	0
HAYS3YMT2-1	Broiler Feather	Chicken	Farm	Henan 3	Henan	k119_2124	HAYS3YMT2-1_l500.fa-k119_2124	IS1216_IS6_unknown	ErmC	IS1216_IS6_unknown-ErmC	74	1	1	1	0
HAYS3YMT2-2	Broiler Feather	Chicken	Farm	Henan 3	Henan	k119_1241310	HAYS3YMT2-2_l500.fa-k119_1241310	IS1216_IS6_unknown	ErmC	IS1216_IS6_unknown-ErmC	74	1	1	1	0
HAYS3YMT2-3	Broiler Feather	Chicken	Farm	Henan 3	Henan	k119_291472	HAYS3YMT2-3_l500.fa-k119_291472	IS1216_IS6_unknown	ErmC	IS1216_IS6_unknown-ErmC	74	1	1	1	0
HAYS3YMT2-4	Broiler Feather	Chicken	Farm	Henan 3	Henan	k119_1193774	HAYS3YMT2-4_l500.fa-k119_1193774	IS1216_IS6_unknown	ErmC	IS1216_IS6_unknown-ErmC	74	1	1	1	0
HAYS3YMT2-5	Broiler Feather	Chicken	Farm	Henan 3	Henan	k119_327934	HAYS3YMT2-5_l500.fa-k119_327934	IS1216_IS6_unknown	ErmC	IS1216_IS6_unknown-ErmC	74	1	1	1	0
HAYS3YMT1-03	Broiler Feather	Chicken	Farm	Henan 3	Henan	k119_335373	HAYS3YMT1-03_l500.fa-k119_335373	IS1216_IS6_unknown	ErmC	IS1216_IS6_unknown-ErmC	74	1	1	1	0
HAYS3YMT1-01	Broiler Feather	Chicken	Farm	Henan 3	Henan	k119_31109	HAYS3YMT1-01_l500.fa-k119_31109	IS1216_IS6_unknown	ErmC	IS1216_IS6_unknown-ErmC	182	1	1	1	0
LNPCJFT2_17	Broiler faeces	Chicken	Farm	Liaoning 1	Liaoning	k119_90908	LNPCJFT2_17_l500.fa-k119_90908	IS1216_IS6_unknown	ErmC	IS1216_IS6_unknown-ErmC	74	1	1	1	0
LNLDJFT1-02	Broiler faeces	Chicken	Farm	Liaoning 3	Liaoning	k119_212703	LNLDJFT1-02_l500.fa-k119_212703	IS1216_IS6_unknown	ErmC	IS1216_IS6_unknown-ErmC	74	1	1	1	0
LNLDJFT1-14	Broiler faeces	Chicken	Farm	Liaoning 3	Liaoning	k119_13935	LNLDJFT1-14_l500.fa-k119_13935	IS1216_IS6_unknown	ErmC	IS1216_IS6_unknown-ErmC	74	1	1	1	0
LNLDJFT1-17	Broiler faeces	Chicken	Farm	Liaoning 3	Liaoning	k119_198258	LNLDJFT1-17_l500.fa-k119_198258	IS1216_IS6_unknown	ErmC	IS1216_IS6_unknown-ErmC	74	1	1	1	0
LNLDJFT2-11	Broiler faeces	Chicken	Farm	Liaoning 3	Liaoning	k119_128510	LNLDJFT2-11_l500.fa-k119_128510	IS1216_IS6_unknown	ErmC	IS1216_IS6_unknown-ErmC	74	1	1	1	0
PDJFL2C5	Broiler faeces	Chicken	Farm	Shandong 1_2	Shandong	k119_447810	PDJFL2C5_l500.fa-k119_447810	IS1216_IS6_unknown	ErmC	IS1216_IS6_unknown-ErmC	74	1	1	1	0
PDJFL2A2	Broiler faeces	Chicken	Farm	Shandong 1_2	Shandong	k119_167381	PDJFL2A2_l500.fa-k119_167381	IS1216_IS6_unknown	ErmC	IS1216_IS6_unknown-ErmC	74	1	1	1	0
PDJFL2C1	Broiler faeces	Chicken	Farm	Shandong 1_2	Shandong	k119_61563	PDJFL2C1_l500.fa-k119_61563	IS1216_IS6_unknown	ErmC	IS1216_IS6_unknown-ErmC	74	1	1	1	0
PDJFL2C2	Broiler faeces	Chicken	Farm	Shandong 1_2	Shandong	k119_93227	PDJFL2C2_l500.fa-k119_93227	IS1216_IS6_unknown	ErmC	IS1216_IS6_unknown-ErmC	74	1	1	1	0
PDJFL2C6	Broiler faeces	Chicken	Farm	Shandong 1_2	Shandong	k119_72497	PDJFL2C6_l500.fa-k119_72497	IS1216_IS6_unknown	ErmC	IS1216_IS6_unknown-ErmC	74	1	1	1	0
PDJFL2C3	Broiler faeces	Chicken	Farm	Shandong 1_2	Shandong	k119_26682	PDJFL2C3_l500.fa-k119_26682	IS1216_IS6_unknown	ErmC	IS1216_IS6_unknown-ErmC	182	1	1	1	0
SDPD1JFT2.02	Broiler faeces	Chicken	Farm	Shandong 2	Shandong	k119_639199	SDPD1JFT2.02_l500.fa-k119_639199	IS1216_IS6_unknown	ErmC	IS1216_IS6_unknown-ErmC	74	1	1	1	0
SDPD1JFT2.08	Broiler faeces	Chicken	Farm	Shandong 2	Shandong	k119_221323	SDPD1JFT2.08_l500.fa-k119_221323	IS1216_IS6_unknown	ErmC	IS1216_IS6_unknown-ErmC	74	1	1	1	0
SDPD1JFT1.08	Broiler faeces	Chicken	Farm	Shandong 2	Shandong	k119_561625	SDPD1JFT1.08_l500.fa-k119_561625	IS1216_IS6_unknown	ErmC	IS1216_IS6_unknown-ErmC	74	1	1	1	0
SDPD1JFT2.14	Broiler faeces	Chicken	Farm	Shandong 2	Shandong	k119_104057	SDPD1JFT2.14_l500.fa-k119_104057	IS1216_IS6_unknown	ErmC	IS1216_IS6_unknown-ErmC	74	1	1	1	0
SDPD1JFT1.10	Broiler faeces	Chicken	Farm	Shandong 2	Shandong	k119_150687	SDPD1JFT1.10_l500.fa-k119_150687	IS1216_IS6_unknown	ErmC	IS1216_IS6_unknown-ErmC	74	1	1	1	0
SDPD1JFT2.01	Broiler faeces	Chicken	Farm	Shandong 2	Shandong	k119_57728	SDPD1JFT2.01_l500.fa-k119_57728	IS1216_IS6_unknown	ErmC	IS1216_IS6_unknown-ErmC	182	1	1	1	0
SDPD3JFT2-03	Broiler faeces	Chicken	Farm	Shandong 3	Shandong	k119_9112	SDPD3JFT2-03_l500.fa-k119_9112	IS1216_IS6_unknown	ErmC	IS1216_IS6_unknown-ErmC	74	1	1	1	0
SDPD3JFT2-07	Broiler faeces	Chicken	Farm	Shandong 3	Shandong	k119_20940	SDPD3JFT2-07_l500.fa-k119_20940	IS1216_IS6_unknown	ErmC	IS1216_IS6_unknown-ErmC	74	1	1	1	0
SDPD3JFT2-09	Broiler faeces	Chicken	Farm	Shandong 3	Shandong	k119_408482	SDPD3JFT2-09_l500.fa-k119_408482	IS1216_IS6_unknown	ErmC	IS1216_IS6_unknown-ErmC	74	1	1	1	0
SDPD3JFT2-10	Broiler faeces	Chicken	Farm	Shandong 3	Shandong	k119_249428	SDPD3JFT2-10_l500.fa-k119_249428	IS1216_IS6_unknown	ErmC	IS1216_IS6_unknown-ErmC	74	1	1	1	0
SDPD4JFT2-01	Broiler faeces	Chicken	Farm	Shandong 4	Shandong	k119_359620	SDPD4JFT2-01_l500.fa-k119_359620	IS1216_IS6_unknown	ErmC	IS1216_IS6_unknown-ErmC	74	1	1	1	0
SDPD4JFT2-03	Broiler faeces	Chicken	Farm	Shandong 4	Shandong	k119_196183	SDPD4JFT2-03_l500.fa-k119_196183	IS1216_IS6_unknown	ErmC	IS1216_IS6_unknown-ErmC	74	1	1	1	0
SDPD4YMT2-04	Broiler Feather	Chicken	Farm	Shandong 4	Shandong	k119_245471	SDPD4YMT2-04_l500.fa-k119_245471	IS1216_IS6_unknown	ErmC	IS1216_IS6_unknown-ErmC	74	1	1	1	0
LNPCDMT1_05	Barn Floor	Environment	Farm	Liaoning 1	Liaoning	k119_65640	LNPCDMT1_05_l500.fa-k119_65640	IS1247_IS1380_unknown	aadA5	IS1247_IS1380_unknown-aadA5	1443	0	1	1	1
SDPD4TRT2-01	Soil	Environment	Farm	Shandong 4	Shandong	k119_955815	SDPD4TRT2-01_l500.fa-k119_955815	IS1247_IS1380_unknown	aadA5	IS1247_IS1380_unknown-aadA5	1443	0	1	1	1
HAYS3HCT2-2	Barn Floor	Environment	Farm	Henan 3	Henan	k119_411817	HAYS3HCT2-2_l500.fa-k119_411817	IS1249_IS256_IS1249	ErmX	IS1249_IS256_IS1249-ErmX	732	0	1	1	1
HAYS3YMT1-03	Broiler Feather	Chicken	Farm	Henan 3	Henan	k119_882725	HAYS3YMT1-03_l500.fa-k119_882725	IS1249_IS256_IS1249	ErmX	IS1249_IS256_IS1249-ErmX	171	0	1	1	1
LNTPJFT1_12	Broiler faeces	Chicken	Farm	Liaoning 2	Liaoning	k119_70872	LNTPJFT1_12_l500.fa-k119_70872	IS1249_IS256_IS1249	ErmX	IS1249_IS256_IS1249-ErmX	171	0	1	1	1
LNTPJFT2_11	Broiler faeces	Chicken	Farm	Liaoning 2	Liaoning	k119_223913	LNTPJFT2_11_l500.fa-k119_223913	IS1249_IS256_IS1249	ErmX	IS1249_IS256_IS1249-ErmX	171	0	1	1	1
LNTPJFT2_13	Broiler faeces	Chicken	Farm	Liaoning 2	Liaoning	k119_233769	LNTPJFT2_13_l500.fa-k119_233769	IS1249_IS256_IS1249	ErmX	IS1249_IS256_IS1249-ErmX	171	0	1	1	1
LNTPJFT2_15	Broiler faeces	Chicken	Farm	Liaoning 2	Liaoning	k119_146471	LNTPJFT2_15_l500.fa-k119_146471	IS1249_IS256_IS1249	ErmX	IS1249_IS256_IS1249-ErmX	731	0	1	1	1
LNLDJFT2-15	Broiler faeces	Chicken	Farm	Liaoning 3	Liaoning	k119_273227	LNLDJFT2-15_l500.fa-k119_273227	IS1249_IS256_IS1249	ErmX	IS1249_IS256_IS1249-ErmX	171	0	1	1	1
SDPD4JFT2-11	Broiler faeces	Chicken	Farm	Shandong 4	Shandong	k119_12311	SDPD4JFT2-11_l500.fa-k119_12311	IS1249_IS256_IS1249	ErmX	IS1249_IS256_IS1249-ErmX	169	0	1	1	1
LNTPJFT2_11	Broiler faeces	Chicken	Farm	Liaoning 2	Liaoning	k119_5943	LNTPJFT2_11_l500.fa-k119_5943	IS1294_IS91_unknown	CTX-M-55	IS1294_IS91_unknown-CTX-M-55	1858	1	1	1	0
SDPD1JFT2.08	Broiler faeces	Chicken	Farm	Shandong 2	Shandong	k119_479805	SDPD1JFT2.08_l500.fa-k119_479805	IS1294_IS91_unknown	CTX-M-55	IS1294_IS91_unknown-CTX-M-55	2792	1	1	1	0
HAYS2JFT2-6	Broiler faeces	Chicken	Farm	Henan 2	Henan	k119_165040	HAYS2JFT2-6_l500.fa-k119_165040	IS1326_IS21_unknown	aadA5	IS1326_IS21_unknown-aadA5	2123	0	1	1	1
HAYS2JFT2-8	Broiler faeces	Chicken	Farm	Henan 2	Henan	k119_313545	HAYS2JFT2-8_l500.fa-k119_313545	IS1326_IS21_unknown	aadA5	IS1326_IS21_unknown-aadA5	2123	0	1	1	1
LNTPDMT1_02	Barn Floor	Environment	Farm	Liaoning 2	Liaoning	k119_311557	LNTPDMT1_02_l500.fa-k119_311557	IS1326_IS21_unknown	aadA5	IS1326_IS21_unknown-aadA5	2123	0	1	1	1
LNTPDMT1_03	Barn Floor	Environment	Farm	Liaoning 2	Liaoning	k119_123005	LNTPDMT1_03_l500.fa-k119_123005	IS1326_IS21_unknown	aadA5	IS1326_IS21_unknown-aadA5	2123	0	1	1	1
HAYS2JFT2-6	Broiler faeces	Chicken	Farm	Henan 2	Henan	k119_165040	HAYS2JFT2-6_l500.fa-k119_165040	IS1326_IS21_unknown	dfrA17	IS1326_IS21_unknown-dfrA17	3042	1	1	1	0
HAYS2JFT2-8	Broiler faeces	Chicken	Farm	Henan 2	Henan	k119_313545	HAYS2JFT2-8_l500.fa-k119_313545	IS1326_IS21_unknown	dfrA17	IS1326_IS21_unknown-dfrA17	3042	1	1	1	0
LNTPDMT1_03	Barn Floor	Environment	Farm	Liaoning 2	Liaoning	k119_123005	LNTPDMT1_03_l500.fa-k119_123005	IS1326_IS21_unknown	dfrA17	IS1326_IS21_unknown-dfrA17	3042	1	1	1	0
LNTPDMT1_02	Barn Floor	Environment	Farm	Liaoning 2	Liaoning	k119_311557	LNTPDMT1_02_l500.fa-k119_311557	IS1326_IS21_unknown	dfrA17	IS1326_IS21_unknown-dfrA17	3042	1	1	1	0
HAYS1JTT3-6	Broiler carcass	Chicken	Slaughterhouse	Henan 1	Henan	k119_128575	HAYS1JTT3-6_l500.fa-k119_128575	IS15_IS6_unknown	AAC(6')-Ib-cr	IS15_IS6_unknown-AAC(6')-Ib-cr	47	1	1	1	0
HAYS1JFT2-1	Broiler faeces	Chicken	Farm	Henan 1	Henan	k119_122923	HAYS1JFT2-1_l500.fa-k119_122923	IS15_IS6_unknown	AAC(6')-Ib-cr	IS15_IS6_unknown-AAC(6')-Ib-cr	47	1	1	1	0
HAYS1JFT1-8	Broiler faeces	Chicken	Farm	Henan 1	Henan	k119_348675	HAYS1JFT1-8_l500.fa-k119_348675	IS15_IS6_unknown	AAC(6')-Ib-cr	IS15_IS6_unknown-AAC(6')-Ib-cr	47	1	1	1	0
HAYS1JFT1-5	Broiler faeces	Chicken	Farm	Henan 1	Henan	k119_351847	HAYS1JFT1-5_l500.fa-k119_351847	IS15_IS6_unknown	AAC(6')-Ib-cr	IS15_IS6_unknown-AAC(6')-Ib-cr	47	1	1	1	0
HAYS1JFT1-1	Broiler faeces	Chicken	Farm	Henan 1	Henan	k119_45662	HAYS1JFT1-1_l500.fa-k119_45662	IS15_IS6_unknown	AAC(6')-Ib-cr	IS15_IS6_unknown-AAC(6')-Ib-cr	47	1	1	1	0
HAYS1JFT1-7	Broiler faeces	Chicken	Farm	Henan 1	Henan	k119_134359	HAYS1JFT1-7_l500.fa-k119_134359	IS15_IS6_unknown	AAC(6')-Ib-cr	IS15_IS6_unknown-AAC(6')-Ib-cr	47	1	1	1	0
HAYS2YMT2-1	Broiler Feather	Chicken	Farm	Henan 2	Henan	k119_207144	HAYS2YMT2-1_l500.fa-k119_207144	IS15_IS6_unknown	AAC(6')-Ib-cr	IS15_IS6_unknown-AAC(6')-Ib-cr	47	1	1	1	0
HAYS2YMT2-5	Broiler Feather	Chicken	Farm	Henan 2	Henan	k119_789306	HAYS2YMT2-5_l500.fa-k119_789306	IS15_IS6_unknown	AAC(6')-Ib-cr	IS15_IS6_unknown-AAC(6')-Ib-cr	47	1	1	1	0
HAYS3JFT1-1	Broiler faeces	Chicken	Farm	Henan 3	Henan	k119_37675	HAYS3JFT1-1_l500.fa-k119_37675	IS15_IS6_unknown	AAC(6')-Ib-cr	IS15_IS6_unknown-AAC(6')-Ib-cr	47	1	1	1	0
HAYS3JFT1-2	Broiler faeces	Chicken	Farm	Henan 3	Henan	k119_66334	HAYS3JFT1-2_l500.fa-k119_66334	IS15_IS6_unknown	AAC(6')-Ib-cr	IS15_IS6_unknown-AAC(6')-Ib-cr	47	1	1	1	0
HAYS3JFT1-3	Broiler faeces	Chicken	Farm	Henan 3	Henan	k119_15090	HAYS3JFT1-3_l500.fa-k119_15090	IS15_IS6_unknown	AAC(6')-Ib-cr	IS15_IS6_unknown-AAC(6')-Ib-cr	47	1	1	1	0
HAYS3JFT2-8	Broiler faeces	Chicken	Farm	Henan 3	Henan	k119_26622	HAYS3JFT2-8_l500.fa-k119_26622	IS15_IS6_unknown	AAC(6')-Ib-cr	IS15_IS6_unknown-AAC(6')-Ib-cr	47	1	1	1	0
HAYS3YMT2-4	Broiler Feather	Chicken	Farm	Henan 3	Henan	k119_1382295	HAYS3YMT2-4_l500.fa-k119_1382295	IS15_IS6_unknown	AAC(6')-Ib-cr	IS15_IS6_unknown-AAC(6')-Ib-cr	47	1	1	1	0
LNTPJFT1_19	Broiler faeces	Chicken	Farm	Liaoning 2	Liaoning	k119_202148	LNTPJFT1_19_l500.fa-k119_202148	IS15_IS6_unknown	AAC(6')-Ib-cr	IS15_IS6_unknown-AAC(6')-Ib-cr	47	1	1	1	0
LNTPJFT2_17	Broiler faeces	Chicken	Farm	Liaoning 2	Liaoning	k119_219996	LNTPJFT2_17_l500.fa-k119_219996	IS15_IS6_unknown	AAC(6')-Ib-cr	IS15_IS6_unknown-AAC(6')-Ib-cr	47	1	1	1	0
LNTPJFT1_16	Broiler faeces	Chicken	Farm	Liaoning 2	Liaoning	k119_205643	LNTPJFT1_16_l500.fa-k119_205643	IS15_IS6_unknown	AAC(6')-Ib-cr	IS15_IS6_unknown-AAC(6')-Ib-cr	47	1	1	1	0
LNTPJFT2_13	Broiler faeces	Chicken	Farm	Liaoning 2	Liaoning	k119_94918	LNTPJFT2_13_l500.fa-k119_94918	IS15_IS6_unknown	AAC(6')-Ib-cr	IS15_IS6_unknown-AAC(6')-Ib-cr	47	1	1	1	0
LNLDDMT1-01	Barn Floor	Environment	Farm	Liaoning 3	Liaoning	k119_336317	LNLDDMT1-01_l500.fa-k119_336317	IS15_IS6_unknown	AAC(6')-Ib-cr	IS15_IS6_unknown-AAC(6')-Ib-cr	47	1	1	1	0
PDJFT1S3L0304	Broiler faeces	Chicken	Farm	Shandong 1_1	Shandong	k119_159265	PDJFT1S3L0304_l500.fa-k119_159265	IS15_IS6_unknown	AAC(6')-Ib-cr	IS15_IS6_unknown-AAC(6')-Ib-cr	47	1	1	1	0
PDJFT2S3L0508	Broiler faeces	Chicken	Farm	Shandong 1_1	Shandong	k119_219765	PDJFT2S3L0508_l500.fa-k119_219765	IS15_IS6_unknown	AAC(6')-Ib-cr	IS15_IS6_unknown-AAC(6')-Ib-cr	47	1	1	1	0
PDJFT1S3L0405	Broiler faeces	Chicken	Farm	Shandong 1_1	Shandong	k119_140756	PDJFT1S3L0405_l500.fa-k119_140756	IS15_IS6_unknown	AAC(6')-Ib-cr	IS15_IS6_unknown-AAC(6')-Ib-cr	47	1	1	1	0
PDJFL2C1	Broiler faeces	Chicken	Farm	Shandong 1_2	Shandong	k119_301999	PDJFL2C1_l500.fa-k119_301999	IS15_IS6_unknown	AAC(6')-Ib-cr	IS15_IS6_unknown-AAC(6')-Ib-cr	47	1	1	1	0
PDJFL1A2	Broiler faeces	Chicken	Farm	Shandong 1_2	Shandong	k119_63338	PDJFL1A2_l500.fa-k119_63338	IS15_IS6_unknown	AAC(6')-Ib-cr	IS15_IS6_unknown-AAC(6')-Ib-cr	47	1	1	1	0
PDJFL1A6	Broiler faeces	Chicken	Farm	Shandong 1_2	Shandong	k119_67067	PDJFL1A6_l500.fa-k119_67067	IS15_IS6_unknown	AAC(6')-Ib-cr	IS15_IS6_unknown-AAC(6')-Ib-cr	47	1	1	1	0
PDJFL1C6	Broiler faeces	Chicken	Farm	Shandong 1_2	Shandong	k119_102241	PDJFL1C6_l500.fa-k119_102241	IS15_IS6_unknown	AAC(6')-Ib-cr	IS15_IS6_unknown-AAC(6')-Ib-cr	47	1	1	1	0
PDJFL1C3	Broiler faeces	Chicken	Farm	Shandong 1_2	Shandong	k119_213908	PDJFL1C3_l500.fa-k119_213908	IS15_IS6_unknown	AAC(6')-Ib-cr	IS15_IS6_unknown-AAC(6')-Ib-cr	47	1	1	1	0
PDJFL1A1	Broiler faeces	Chicken	Farm	Shandong 1_2	Shandong	k119_5702	PDJFL1A1_l500.fa-k119_5702	IS15_IS6_unknown	AAC(6')-Ib-cr	IS15_IS6_unknown-AAC(6')-Ib-cr	47	1	1	1	0
PDJFL2C4	Broiler faeces	Chicken	Farm	Shandong 1_2	Shandong	k119_127226	PDJFL2C4_l500.fa-k119_127226	IS15_IS6_unknown	AAC(6')-Ib-cr	IS15_IS6_unknown-AAC(6')-Ib-cr	47	1	1	1	0
PDJFL2C5	Broiler faeces	Chicken	Farm	Shandong 1_2	Shandong	k119_264398	PDJFL2C5_l500.fa-k119_264398	IS15_IS6_unknown	AAC(6')-Ib-cr	IS15_IS6_unknown-AAC(6')-Ib-cr	47	1	1	1	0
SDPD1JTT3.14	Broiler carcass	Chicken	Slaughterhouse	Shandong 2	Shandong	k119_83892	SDPD1JTT3.14_l500.fa-k119_83892	IS15_IS6_unknown	AAC(6')-Ib-cr	IS15_IS6_unknown-AAC(6')-Ib-cr	47	1	1	1	0
SDPD1JTT3.15	Broiler carcass	Chicken	Slaughterhouse	Shandong 2	Shandong	k119_500554	SDPD1JTT3.15_l500.fa-k119_500554	IS15_IS6_unknown	AAC(6')-Ib-cr	IS15_IS6_unknown-AAC(6')-Ib-cr	47	1	1	1	0
SDPD1JFT1.02	Broiler faeces	Chicken	Farm	Shandong 2	Shandong	k119_37899	SDPD1JFT1.02_l500.fa-k119_37899	IS15_IS6_unknown	AAC(6')-Ib-cr	IS15_IS6_unknown-AAC(6')-Ib-cr	47	1	1	1	0
SDPD1JFT1.06	Broiler faeces	Chicken	Farm	Shandong 2	Shandong	k119_352485	SDPD1JFT1.06_l500.fa-k119_352485	IS15_IS6_unknown	AAC(6')-Ib-cr	IS15_IS6_unknown-AAC(6')-Ib-cr	47	1	1	1	0
SDPD1JFT2.12	Broiler faeces	Chicken	Farm	Shandong 2	Shandong	k119_272836	SDPD1JFT2.12_l500.fa-k119_272836	IS15_IS6_unknown	AAC(6')-Ib-cr	IS15_IS6_unknown-AAC(6')-Ib-cr	47	1	1	1	0
SDPD1JFT1.15	Broiler faeces	Chicken	Farm	Shandong 2	Shandong	k119_242846	SDPD1JFT1.15_l500.fa-k119_242846	IS15_IS6_unknown	AAC(6')-Ib-cr	IS15_IS6_unknown-AAC(6')-Ib-cr	47	1	1	1	0
SDPD3JFT1-03	Broiler faeces	Chicken	Farm	Shandong 3	Shandong	k119_164723	SDPD3JFT1-03_l500.fa-k119_164723	IS15_IS6_unknown	AAC(6')-Ib-cr	IS15_IS6_unknown-AAC(6')-Ib-cr	47	1	1	1	0
SDPD3JFT1-13	Broiler faeces	Chicken	Farm	Shandong 3	Shandong	k119_158658	SDPD3JFT1-13_l500.fa-k119_158658	IS15_IS6_unknown	AAC(6')-Ib-cr	IS15_IS6_unknown-AAC(6')-Ib-cr	47	1	1	1	0
HAYS1JFT2-1	Broiler faeces	Chicken	Farm	Henan 1	Henan	k119_166568	HAYS1JFT2-1_l500.fa-k119_166568	IS15_IS6_unknown	aadA5	IS15_IS6_unknown-aadA5	138	0	1	1	1
HAYS2JFT1-8	Broiler faeces	Chicken	Farm	Henan 2	Henan	k119_198766	HAYS2JFT1-8_l500.fa-k119_198766	IS15_IS6_unknown	aadA5	IS15_IS6_unknown-aadA5	138	0	1	1	1
HAYS2JFT2-11	Broiler faeces	Chicken	Farm	Henan 2	Henan	k119_11933	HAYS2JFT2-11_l500.fa-k119_11933	IS15_IS6_unknown	aadA5	IS15_IS6_unknown-aadA5	138	0	1	1	1
HAYS2YMT1-3	Broiler Feather	Chicken	Farm	Henan 2	Henan	k119_839956	HAYS2YMT1-3_l500.fa-k119_839956	IS15_IS6_unknown	aadA5	IS15_IS6_unknown-aadA5	138	0	1	1	1
HAYS3JFT1-14	Broiler faeces	Chicken	Farm	Henan 3	Henan	k119_182336	HAYS3JFT1-14_l500.fa-k119_182336	IS15_IS6_unknown	aadA5	IS15_IS6_unknown-aadA5	138	0	1	1	1
HAYS3YMT1-04	Broiler Feather	Chicken	Farm	Henan 3	Henan	k119_344685	HAYS3YMT1-04_l500.fa-k119_344685	IS15_IS6_unknown	aadA5	IS15_IS6_unknown-aadA5	138	0	1	1	1
LNLDDMT1-01	Barn Floor	Environment	Farm	Liaoning 3	Liaoning	k119_257762	LNLDDMT1-01_l500.fa-k119_257762	IS15_IS6_unknown	aadA5	IS15_IS6_unknown-aadA5	138	0	1	1	1
LNLDDMT1-02	Barn Floor	Environment	Farm	Liaoning 3	Liaoning	k119_116433	LNLDDMT1-02_l500.fa-k119_116433	IS15_IS6_unknown	aadA5	IS15_IS6_unknown-aadA5	138	0	1	1	1
PDJFT1S4L0313	Broiler faeces	Chicken	Farm	Shandong 1_1	Shandong	k119_7645	PDJFT1S4L0313_l500.fa-k119_7645	IS15_IS6_unknown	aadA5	IS15_IS6_unknown-aadA5	154	0	1	1	1
PDJFT2S4L0819	Broiler faeces	Chicken	Farm	Shandong 1_1	Shandong	k119_51063	PDJFT2S4L0819_l500.fa-k119_51063	IS15_IS6_unknown	aadA5	IS15_IS6_unknown-aadA5	154	0	1	1	1
PDJFT1S4L0515	Broiler faeces	Chicken	Farm	Shandong 1_1	Shandong	k119_30530	PDJFT1S4L0515_l500.fa-k119_30530	IS15_IS6_unknown	aadA5	IS15_IS6_unknown-aadA5	154	0	1	1	1
PDJFT2S4L0515	Broiler faeces	Chicken	Farm	Shandong 1_1	Shandong	k119_19786	PDJFT2S4L0515_l500.fa-k119_19786	IS15_IS6_unknown	aadA5	IS15_IS6_unknown-aadA5	154	0	1	1	1
PDJFL1A2	Broiler faeces	Chicken	Farm	Shandong 1_2	Shandong	k119_50405	PDJFL1A2_l500.fa-k119_50405	IS15_IS6_unknown	aadA5	IS15_IS6_unknown-aadA5	138	0	1	1	1
SDPD1JFT1.02	Broiler faeces	Chicken	Farm	Shandong 2	Shandong	k119_30103	SDPD1JFT1.02_l500.fa-k119_30103	IS15_IS6_unknown	aadA5	IS15_IS6_unknown-aadA5	105	0	1	1	1
HAYS3JFT1-15	Broiler faeces	Chicken	Farm	Henan 3	Henan	k119_203786	HAYS3JFT1-15_l500.fa-k119_203786	IS15_IS6_unknown	cmlA1	IS15_IS6_unknown-cmlA1	2916	1	1	1	0
HAYS3JFT2-8	Broiler faeces	Chicken	Farm	Henan 3	Henan	k119_26622	HAYS3JFT2-8_l500.fa-k119_26622	IS15_IS6_unknown	cmlA1	IS15_IS6_unknown-cmlA1	3235	1	1	1	0
LNTPJFT2_13	Broiler faeces	Chicken	Farm	Liaoning 2	Liaoning	k119_94918	LNTPJFT2_13_l500.fa-k119_94918	IS15_IS6_unknown	cmlA1	IS15_IS6_unknown-cmlA1	3235	1	1	1	0
SDPD1JFT1.06	Broiler faeces	Chicken	Farm	Shandong 2	Shandong	k119_197699	SDPD1JFT1.06_l500.fa-k119_197699	IS15_IS6_unknown	cmlA1	IS15_IS6_unknown-cmlA1	2604	1	1	1	0
HAYS2JFT1-14	Broiler faeces	Chicken	Farm	Henan 2	Henan	k119_9180	HAYS2JFT1-14_l500.fa-k119_9180	IS15_IS6_unknown	cmlA5	IS15_IS6_unknown-cmlA5	2604	1	1	1	0
HAYS3JFT1-1	Broiler faeces	Chicken	Farm	Henan 3	Henan	k119_39743	HAYS3JFT1-1_l500.fa-k119_39743	IS15_IS6_unknown	cmlA5	IS15_IS6_unknown-cmlA5	2604	1	1	1	0
HAYS3JFT1-11	Broiler faeces	Chicken	Farm	Henan 3	Henan	k119_19022	HAYS3JFT1-11_l500.fa-k119_19022	IS15_IS6_unknown	cmlA5	IS15_IS6_unknown-cmlA5	2604	1	1	1	0
HAYS3JFT2-2	Broiler faeces	Chicken	Farm	Henan 3	Henan	k119_46278	HAYS3JFT2-2_l500.fa-k119_46278	IS15_IS6_unknown	cmlA5	IS15_IS6_unknown-cmlA5	2604	1	1	1	0
HAYS3JFT2-1	Broiler faeces	Chicken	Farm	Henan 3	Henan	k119_261871	HAYS3JFT2-1_l500.fa-k119_261871	IS15_IS6_unknown	cmlA5	IS15_IS6_unknown-cmlA5	2604	1	1	1	0
HAYS3JFT1-2	Broiler faeces	Chicken	Farm	Henan 3	Henan	k119_143364	HAYS3JFT1-2_l500.fa-k119_143364	IS15_IS6_unknown	cmlA5	IS15_IS6_unknown-cmlA5	2604	1	1	1	0
HAYS3JFT2-11	Broiler faeces	Chicken	Farm	Henan 3	Henan	k119_168810	HAYS3JFT2-11_l500.fa-k119_168810	IS15_IS6_unknown	cmlA5	IS15_IS6_unknown-cmlA5	2916	1	1	1	0
LNPCJFT1_04	Broiler faeces	Chicken	Farm	Liaoning 1	Liaoning	k119_8529	LNPCJFT1_04_l500.fa-k119_8529	IS15_IS6_unknown	cmlA5	IS15_IS6_unknown-cmlA5	1952	1	1	1	0
LNLDJFT1-15	Broiler faeces	Chicken	Farm	Liaoning 3	Liaoning	k119_13094	LNLDJFT1-15_l500.fa-k119_13094	IS15_IS6_unknown	cmlA5	IS15_IS6_unknown-cmlA5	2604	1	1	1	0
PDJFL1C2	Broiler faeces	Chicken	Farm	Shandong 1_2	Shandong	k119_229747	PDJFL1C2_l500.fa-k119_229747	IS15_IS6_unknown	cmlA5	IS15_IS6_unknown-cmlA5	2604	1	1	1	0
PDJFL1A6	Broiler faeces	Chicken	Farm	Shandong 1_2	Shandong	k119_14299	PDJFL1A6_l500.fa-k119_14299	IS15_IS6_unknown	cmlA5	IS15_IS6_unknown-cmlA5	2604	1	1	1	0
PDJFL1A3	Broiler faeces	Chicken	Farm	Shandong 1_2	Shandong	k119_23063	PDJFL1A3_l500.fa-k119_23063	IS15_IS6_unknown	cmlA5	IS15_IS6_unknown-cmlA5	2604	1	1	1	0
PDJFL1A4	Broiler faeces	Chicken	Farm	Shandong 1_2	Shandong	k119_52577	PDJFL1A4_l500.fa-k119_52577	IS15_IS6_unknown	cmlA5	IS15_IS6_unknown-cmlA5	2604	1	1	1	0
SDPD1JFT1.14	Broiler faeces	Chicken	Farm	Shandong 2	Shandong	k119_419261	SDPD1JFT1.14_l500.fa-k119_419261	IS15_IS6_unknown	cmlA5	IS15_IS6_unknown-cmlA5	2604	1	1	1	0
SDPD1JFT1.15	Broiler faeces	Chicken	Farm	Shandong 2	Shandong	k119_242846	SDPD1JFT1.15_l500.fa-k119_242846	IS15_IS6_unknown	cmlA5	IS15_IS6_unknown-cmlA5	3235	1	1	1	0
SDPD3TWT3-01	Wastewater	Environment	Slaughterhouse	Shandong 3	Shandong	k119_506218	SDPD3TWT3-01_l500.fa-k119_506218	IS15_IS6_unknown	cmlA5	IS15_IS6_unknown-cmlA5	2916	1	1	1	0
HAYS1JTT3-6	Broiler carcass	Chicken	Slaughterhouse	Henan 1	Henan	k119_132132	HAYS1JTT3-6_l500.fa-k119_132132	IS15_IS6_unknown	CTX-M-55	IS15_IS6_unknown-CTX-M-55	370	1	1	1	0
HAYS2JFT1-12	Broiler faeces	Chicken	Farm	Henan 2	Henan	k119_156976	HAYS2JFT1-12_l500.fa-k119_156976	IS15_IS6_unknown	CTX-M-55	IS15_IS6_unknown-CTX-M-55	3501	1	1	1	0
HAYS2YMT2-1	Broiler Feather	Chicken	Farm	Henan 2	Henan	k119_1012280	HAYS2YMT2-1_l500.fa-k119_1012280	IS15_IS6_unknown	CTX-M-55	IS15_IS6_unknown-CTX-M-55	764	1	1	1	0
HAYS3JFT1-2	Broiler faeces	Chicken	Farm	Henan 3	Henan	k119_430700	HAYS3JFT1-2_l500.fa-k119_430700	IS15_IS6_unknown	CTX-M-55	IS15_IS6_unknown-CTX-M-55	370	1	1	1	0
HAYS3JFT1-11	Broiler faeces	Chicken	Farm	Henan 3	Henan	k119_18797	HAYS3JFT1-11_l500.fa-k119_18797	IS15_IS6_unknown	CTX-M-55	IS15_IS6_unknown-CTX-M-55	370	1	1	1	0
HAYS3JFT2-2	Broiler faeces	Chicken	Farm	Henan 3	Henan	k119_218453	HAYS3JFT2-2_l500.fa-k119_218453	IS15_IS6_unknown	CTX-M-55	IS15_IS6_unknown-CTX-M-55	1523	1	1	1	0
LNTPDMT2_03	Barn Floor	Environment	Farm	Liaoning 2	Liaoning	k119_497059	LNTPDMT2_03_l500.fa-k119_497059	IS15_IS6_unknown	CTX-M-55	IS15_IS6_unknown-CTX-M-55	291	1	1	1	0
LNTPJFT1_12	Broiler faeces	Chicken	Farm	Liaoning 2	Liaoning	k119_107962	LNTPJFT1_12_l500.fa-k119_107962	IS15_IS6_unknown	CTX-M-55	IS15_IS6_unknown-CTX-M-55	370	1	1	1	0
LNTPJFT1_16	Broiler faeces	Chicken	Farm	Liaoning 2	Liaoning	k119_94091	LNTPJFT1_16_l500.fa-k119_94091	IS15_IS6_unknown	CTX-M-55	IS15_IS6_unknown-CTX-M-55	370	1	1	1	0
LNTPJFT2_11	Broiler faeces	Chicken	Farm	Liaoning 2	Liaoning	k119_5943	LNTPJFT2_11_l500.fa-k119_5943	IS15_IS6_unknown	CTX-M-55	IS15_IS6_unknown-CTX-M-55	578	1	1	1	0
LNTPJFT1_02	Broiler faeces	Chicken	Farm	Liaoning 2	Liaoning	k119_173661	LNTPJFT1_02_l500.fa-k119_173661	IS15_IS6_unknown	CTX-M-55	IS15_IS6_unknown-CTX-M-55	1523	1	1	1	0
LNTPJFT2_15	Broiler faeces	Chicken	Farm	Liaoning 2	Liaoning	k119_55029	LNTPJFT2_15_l500.fa-k119_55029	IS15_IS6_unknown	CTX-M-55	IS15_IS6_unknown-CTX-M-55	1523	1	1	1	0
LNTPJFT1_06	Broiler faeces	Chicken	Farm	Liaoning 2	Liaoning	k119_222088	LNTPJFT1_06_l500.fa-k119_222088	IS15_IS6_unknown	CTX-M-55	IS15_IS6_unknown-CTX-M-55	1797	1	1	1	0
PDDTT3S4L0820	Broiler carcass	Chicken	Slaughterhouse	Shandong 1_1	Shandong	k119_46860	PDDTT3S4L0820_l500.fa-k119_46860	IS15_IS6_unknown	CTX-M-55	IS15_IS6_unknown-CTX-M-55	1523	1	1	1	0
PDJFT1S3L0508	Broiler faeces	Chicken	Farm	Shandong 1_1	Shandong	k119_34597	PDJFT1S3L0508_l500.fa-k119_34597	IS15_IS6_unknown	CTX-M-55	IS15_IS6_unknown-CTX-M-55	370	1	1	1	0
PDJFT1S3L0507	Broiler faeces	Chicken	Farm	Shandong 1_1	Shandong	k119_315805	PDJFT1S3L0507_l500.fa-k119_315805	IS15_IS6_unknown	CTX-M-55	IS15_IS6_unknown-CTX-M-55	370	1	1	1	0
PDJFT2S4L0313	Broiler faeces	Chicken	Farm	Shandong 1_1	Shandong	k119_32940	PDJFT2S4L0313_l500.fa-k119_32940	IS15_IS6_unknown	CTX-M-55	IS15_IS6_unknown-CTX-M-55	370	1	1	1	0
PDJFT2S4L0515	Broiler faeces	Chicken	Farm	Shandong 1_1	Shandong	k119_16653	PDJFT2S4L0515_l500.fa-k119_16653	IS15_IS6_unknown	CTX-M-55	IS15_IS6_unknown-CTX-M-55	370	1	1	1	0
PDJFT1S4L0819	Broiler faeces	Chicken	Farm	Shandong 1_1	Shandong	k119_10864	PDJFT1S4L0819_l500.fa-k119_10864	IS15_IS6_unknown	CTX-M-55	IS15_IS6_unknown-CTX-M-55	370	1	1	1	0
PDJFT1S4L0212	Broiler faeces	Chicken	Farm	Shandong 1_1	Shandong	k119_243282	PDJFT1S4L0212_l500.fa-k119_243282	IS15_IS6_unknown	CTX-M-55	IS15_IS6_unknown-CTX-M-55	542	1	1	1	0
PDJFT1S3L0303	Broiler faeces	Chicken	Farm	Shandong 1_1	Shandong	k119_2675	PDJFT1S3L0303_l500.fa-k119_2675	IS15_IS6_unknown	CTX-M-55	IS15_IS6_unknown-CTX-M-55	1238	1	1	1	0
PDJFT1S4L0515	Broiler faeces	Chicken	Farm	Shandong 1_1	Shandong	k119_8147	PDJFT1S4L0515_l500.fa-k119_8147	IS15_IS6_unknown	CTX-M-55	IS15_IS6_unknown-CTX-M-55	1737	1	1	1	0
PDJFT1S3L0101	Broiler faeces	Chicken	Farm	Shandong 1_1	Shandong	k119_151503	PDJFT1S3L0101_l500.fa-k119_151503	IS15_IS6_unknown	CTX-M-55	IS15_IS6_unknown-CTX-M-55	2079	1	1	1	0
PDJFL2C2	Broiler faeces	Chicken	Farm	Shandong 1_2	Shandong	k119_39004	PDJFL2C2_l500.fa-k119_39004	IS15_IS6_unknown	CTX-M-55	IS15_IS6_unknown-CTX-M-55	542	1	1	1	0
SDPD1JTT3.07	Broiler carcass	Chicken	Slaughterhouse	Shandong 2	Shandong	k119_129864	SDPD1JTT3.07_l500.fa-k119_129864	IS15_IS6_unknown	CTX-M-55	IS15_IS6_unknown-CTX-M-55	370	1	1	1	0
SDPD1JTT3.14	Broiler carcass	Chicken	Slaughterhouse	Shandong 2	Shandong	k119_190532	SDPD1JTT3.14_l500.fa-k119_190532	IS15_IS6_unknown	CTX-M-55	IS15_IS6_unknown-CTX-M-55	370	1	1	1	0
SDPD1JFT2.05	Broiler faeces	Chicken	Farm	Shandong 2	Shandong	k119_708552	SDPD1JFT2.05_l500.fa-k119_708552	IS15_IS6_unknown	CTX-M-55	IS15_IS6_unknown-CTX-M-55	516	1	1	1	0
SDPD1YMT2.04	Broiler Feather	Chicken	Farm	Shandong 2	Shandong	k119_604339	SDPD1YMT2.04_l500.fa-k119_604339	IS15_IS6_unknown	CTX-M-55	IS15_IS6_unknown-CTX-M-55	370	1	1	1	0
SDPD1JFT2.05	Broiler faeces	Chicken	Farm	Shandong 2	Shandong	k119_878619	SDPD1JFT2.05_l500.fa-k119_878619	IS15_IS6_unknown	CTX-M-9	IS15_IS6_unknown-CTX-M-9	3938	0	1	1	1
SDPD1YMT2.04	Broiler Feather	Chicken	Farm	Shandong 2	Shandong	k119_318232	SDPD1YMT2.04_l500.fa-k119_318232	IS15_IS6_unknown	CTX-M-9	IS15_IS6_unknown-CTX-M-9	3938	0	1	1	1
HAYS1JFT1-1	Broiler faeces	Chicken	Farm	Henan 1	Henan	k119_9110	HAYS1JFT1-1_l500.fa-k119_9110	IS15_IS6_unknown	dfrA17	IS15_IS6_unknown-dfrA17	78	1	1	1	0
HAYS1JFT2-1	Broiler faeces	Chicken	Farm	Henan 1	Henan	k119_166568	HAYS1JFT2-1_l500.fa-k119_166568	IS15_IS6_unknown	dfrA17	IS15_IS6_unknown-dfrA17	1057	1	1	1	0
HAYS2JFT1-14	Broiler faeces	Chicken	Farm	Henan 2	Henan	k119_44886	HAYS2JFT1-14_l500.fa-k119_44886	IS15_IS6_unknown	dfrA17	IS15_IS6_unknown-dfrA17	78	1	1	1	0
HAYS2JFT1-12	Broiler faeces	Chicken	Farm	Henan 2	Henan	k119_4366	HAYS2JFT1-12_l500.fa-k119_4366	IS15_IS6_unknown	dfrA17	IS15_IS6_unknown-dfrA17	795	1	1	1	0
HAYS2JFT1-8	Broiler faeces	Chicken	Farm	Henan 2	Henan	k119_198766	HAYS2JFT1-8_l500.fa-k119_198766	IS15_IS6_unknown	dfrA17	IS15_IS6_unknown-dfrA17	1057	1	1	1	0
HAYS2JFT2-11	Broiler faeces	Chicken	Farm	Henan 2	Henan	k119_11933	HAYS2JFT2-11_l500.fa-k119_11933	IS15_IS6_unknown	dfrA17	IS15_IS6_unknown-dfrA17	1057	1	1	1	0
HAYS2YMT2-3	Broiler Feather	Chicken	Farm	Henan 2	Henan	k119_352702	HAYS2YMT2-3_l500.fa-k119_352702	IS15_IS6_unknown	dfrA17	IS15_IS6_unknown-dfrA17	78	1	1	1	0
HAYS3JFT1-15	Broiler faeces	Chicken	Farm	Henan 3	Henan	k119_309138	HAYS3JFT1-15_l500.fa-k119_309138	IS15_IS6_unknown	dfrA17	IS15_IS6_unknown-dfrA17	162	1	1	1	0
HAYS3JFT1-2	Broiler faeces	Chicken	Farm	Henan 3	Henan	k119_341033	HAYS3JFT1-2_l500.fa-k119_341033	IS15_IS6_unknown	dfrA17	IS15_IS6_unknown-dfrA17	710	1	1	1	0
HAYS3JFT1-14	Broiler faeces	Chicken	Farm	Henan 3	Henan	k119_182336	HAYS3JFT1-14_l500.fa-k119_182336	IS15_IS6_unknown	dfrA17	IS15_IS6_unknown-dfrA17	1057	1	1	1	0
LNPCJFT1_01	Broiler faeces	Chicken	Farm	Liaoning 1	Liaoning	k119_25952	LNPCJFT1_01_l500.fa-k119_25952	IS15_IS6_unknown	dfrA17	IS15_IS6_unknown-dfrA17	162	1	1	1	0
LNTPJFT2_11	Broiler faeces	Chicken	Farm	Liaoning 2	Liaoning	k119_202151	LNTPJFT2_11_l500.fa-k119_202151	IS15_IS6_unknown	dfrA17	IS15_IS6_unknown-dfrA17	252	1	1	1	0
LNLDDMT1-01	Barn Floor	Environment	Farm	Liaoning 3	Liaoning	k119_257762	LNLDDMT1-01_l500.fa-k119_257762	IS15_IS6_unknown	dfrA17	IS15_IS6_unknown-dfrA17	1057	1	1	1	0
LNLDDMT1-02	Barn Floor	Environment	Farm	Liaoning 3	Liaoning	k119_116433	LNLDDMT1-02_l500.fa-k119_116433	IS15_IS6_unknown	dfrA17	IS15_IS6_unknown-dfrA17	1057	1	1	1	0
LNLDJFT1-05	Broiler faeces	Chicken	Farm	Liaoning 3	Liaoning	k119_95179	LNLDJFT1-05_l500.fa-k119_95179	IS15_IS6_unknown	dfrA17	IS15_IS6_unknown-dfrA17	795	1	1	1	0
PDJFT2S4L0515	Broiler faeces	Chicken	Farm	Shandong 1_1	Shandong	k119_19786	PDJFT2S4L0515_l500.fa-k119_19786	IS15_IS6_unknown	dfrA17	IS15_IS6_unknown-dfrA17	1073	1	1	1	0
PDJFT1S4L0313	Broiler faeces	Chicken	Farm	Shandong 1_1	Shandong	k119_7645	PDJFT1S4L0313_l500.fa-k119_7645	IS15_IS6_unknown	dfrA17	IS15_IS6_unknown-dfrA17	1073	1	1	1	0
PDJFT2S4L0819	Broiler faeces	Chicken	Farm	Shandong 1_1	Shandong	k119_51063	PDJFT2S4L0819_l500.fa-k119_51063	IS15_IS6_unknown	dfrA17	IS15_IS6_unknown-dfrA17	1073	1	1	1	0
PDJFT1S4L0515	Broiler faeces	Chicken	Farm	Shandong 1_1	Shandong	k119_30530	PDJFT1S4L0515_l500.fa-k119_30530	IS15_IS6_unknown	dfrA17	IS15_IS6_unknown-dfrA17	1073	1	1	1	0
PDJFL1C5	Broiler faeces	Chicken	Farm	Shandong 1_2	Shandong	k119_17528	PDJFL1C5_l500.fa-k119_17528	IS15_IS6_unknown	dfrA17	IS15_IS6_unknown-dfrA17	795	1	1	1	0
PDJFL1C6	Broiler faeces	Chicken	Farm	Shandong 1_2	Shandong	k119_11752	PDJFL1C6_l500.fa-k119_11752	IS15_IS6_unknown	dfrA17	IS15_IS6_unknown-dfrA17	795	1	1	1	0
PDJFL1A2	Broiler faeces	Chicken	Farm	Shandong 1_2	Shandong	k119_50405	PDJFL1A2_l500.fa-k119_50405	IS15_IS6_unknown	dfrA17	IS15_IS6_unknown-dfrA17	1057	1	1	1	0
SDPD1JFT1.09	Broiler faeces	Chicken	Farm	Shandong 2	Shandong	k119_91055	SDPD1JFT1.09_l500.fa-k119_91055	IS15_IS6_unknown	dfrA17	IS15_IS6_unknown-dfrA17	795	1	1	1	0
SDPD1JFT1.02	Broiler faeces	Chicken	Farm	Shandong 2	Shandong	k119_30103	SDPD1JFT1.02_l500.fa-k119_30103	IS15_IS6_unknown	dfrA17	IS15_IS6_unknown-dfrA17	1024	1	1	1	0
SDPD3JFT2-02	Broiler faeces	Chicken	Farm	Shandong 3	Shandong	k119_5853	SDPD3JFT2-02_l500.fa-k119_5853	IS15_IS6_unknown	dfrA17	IS15_IS6_unknown-dfrA17	162	1	1	1	0
SDPD3JFT1-03	Broiler faeces	Chicken	Farm	Shandong 3	Shandong	k119_15741	SDPD3JFT1-03_l500.fa-k119_15741	IS15_IS6_unknown	dfrA17	IS15_IS6_unknown-dfrA17	710	1	1	1	0
LNPCDMT1_05	Barn Floor	Environment	Farm	Liaoning 1	Liaoning	k119_785049	LNPCDMT1_05_l500.fa-k119_785049	IS15_IS6_unknown	DHA-1	IS15_IS6_unknown-DHA-1	808	0	1	1	1
LNPCJFT1_08	Broiler faeces	Chicken	Farm	Liaoning 1	Liaoning	k119_332912	LNPCJFT1_08_l500.fa-k119_332912	IS15_IS6_unknown	DHA-1	IS15_IS6_unknown-DHA-1	808	0	1	1	1
LNPCJFT1_10	Broiler faeces	Chicken	Farm	Liaoning 1	Liaoning	k119_67707	LNPCJFT1_10_l500.fa-k119_67707	IS15_IS6_unknown	DHA-1	IS15_IS6_unknown-DHA-1	808	0	1	1	1
LNTPDMT1_03	Barn Floor	Environment	Farm	Liaoning 2	Liaoning	k119_229432	LNTPDMT1_03_l500.fa-k119_229432	IS15_IS6_unknown	DHA-1	IS15_IS6_unknown-DHA-1	808	0	1	1	1
SDPD4HCT1-01	Barn Floor	Environment	Farm	Shandong 4	Shandong	k119_652100	SDPD4HCT1-01_l500.fa-k119_652100	IS15_IS6_unknown	DHA-1	IS15_IS6_unknown-DHA-1	808	0	1	1	1
SDPD4HCT2-01	Barn Floor	Environment	Farm	Shandong 4	Shandong	k119_1426738	SDPD4HCT2-01_l500.fa-k119_1426738	IS15_IS6_unknown	DHA-1	IS15_IS6_unknown-DHA-1	808	0	1	1	1
SDPD4JFT1-17	Broiler faeces	Chicken	Farm	Shandong 4	Shandong	k119_275968	SDPD4JFT1-17_l500.fa-k119_275968	IS15_IS6_unknown	DHA-1	IS15_IS6_unknown-DHA-1	808	0	1	1	1
SDPD4JFT1-18	Broiler faeces	Chicken	Farm	Shandong 4	Shandong	k119_889710	SDPD4JFT1-18_l500.fa-k119_889710	IS15_IS6_unknown	DHA-1	IS15_IS6_unknown-DHA-1	808	0	1	1	1
SDPD4JFT2-01	Broiler faeces	Chicken	Farm	Shandong 4	Shandong	k119_506202	SDPD4JFT2-01_l500.fa-k119_506202	IS15_IS6_unknown	DHA-1	IS15_IS6_unknown-DHA-1	808	0	1	1	1
SDPD4JFT2-17	Broiler faeces	Chicken	Farm	Shandong 4	Shandong	k119_319452	SDPD4JFT2-17_l500.fa-k119_319452	IS15_IS6_unknown	DHA-1	IS15_IS6_unknown-DHA-1	808	0	1	1	1
SDPD4JFT2-03	Broiler faeces	Chicken	Farm	Shandong 4	Shandong	k119_346354	SDPD4JFT2-03_l500.fa-k119_346354	IS15_IS6_unknown	DHA-1	IS15_IS6_unknown-DHA-1	808	0	1	1	1
SDPD4YMT1-05	Broiler Feather	Chicken	Farm	Shandong 4	Shandong	k119_675460	SDPD4YMT1-05_l500.fa-k119_675460	IS15_IS6_unknown	DHA-1	IS15_IS6_unknown-DHA-1	808	0	1	1	1
SDPD4TRT1-01	Soil	Environment	Farm	Shandong 4	Shandong	k119_574519	SDPD4TRT1-01_l500.fa-k119_574519	IS15_IS6_unknown	DHA-1	IS15_IS6_unknown-DHA-1	808	0	1	1	1
HAYS1JTT3-6	Broiler carcass	Chicken	Slaughterhouse	Henan 1	Henan	k119_20368	HAYS1JTT3-6_l500.fa-k119_20368	IS15_IS6_unknown	linG	IS15_IS6_unknown-linG	90	0	1	1	1
HAYS1JFT2-3	Broiler faeces	Chicken	Farm	Henan 1	Henan	k119_553401	HAYS1JFT2-3_l500.fa-k119_553401	IS15_IS6_unknown	linG	IS15_IS6_unknown-linG	90	0	1	1	1
HAYS1JFT1-1	Broiler faeces	Chicken	Farm	Henan 1	Henan	k119_26017	HAYS1JFT1-1_l500.fa-k119_26017	IS15_IS6_unknown	linG	IS15_IS6_unknown-linG	90	0	1	1	1
HAYS1JFT1-2	Broiler faeces	Chicken	Farm	Henan 1	Henan	k119_225283	HAYS1JFT1-2_l500.fa-k119_225283	IS15_IS6_unknown	linG	IS15_IS6_unknown-linG	90	0	1	1	1
HAYS1JFT1-3	Broiler faeces	Chicken	Farm	Henan 1	Henan	k119_100756	HAYS1JFT1-3_l500.fa-k119_100756	IS15_IS6_unknown	linG	IS15_IS6_unknown-linG	90	0	1	1	1
HAYS1JFT1-4	Broiler faeces	Chicken	Farm	Henan 1	Henan	k119_48587	HAYS1JFT1-4_l500.fa-k119_48587	IS15_IS6_unknown	linG	IS15_IS6_unknown-linG	90	0	1	1	1
HAYS1JFT1-6	Broiler faeces	Chicken	Farm	Henan 1	Henan	k119_18231	HAYS1JFT1-6_l500.fa-k119_18231	IS15_IS6_unknown	linG	IS15_IS6_unknown-linG	90	0	1	1	1
HAYS1JFT1-7	Broiler faeces	Chicken	Farm	Henan 1	Henan	k119_30205	HAYS1JFT1-7_l500.fa-k119_30205	IS15_IS6_unknown	linG	IS15_IS6_unknown-linG	90	0	1	1	1
HAYS1JFT2-1	Broiler faeces	Chicken	Farm	Henan 1	Henan	k119_84697	HAYS1JFT2-1_l500.fa-k119_84697	IS15_IS6_unknown	linG	IS15_IS6_unknown-linG	90	0	1	1	1
HAYS1JFT2-2	Broiler faeces	Chicken	Farm	Henan 1	Henan	k119_60038	HAYS1JFT2-2_l500.fa-k119_60038	IS15_IS6_unknown	linG	IS15_IS6_unknown-linG	90	0	1	1	1
HAYS1JFT2-5	Broiler faeces	Chicken	Farm	Henan 1	Henan	k119_153992	HAYS1JFT2-5_l500.fa-k119_153992	IS15_IS6_unknown	linG	IS15_IS6_unknown-linG	90	0	1	1	1
HAYS1JFT2-7	Broiler faeces	Chicken	Farm	Henan 1	Henan	k119_608979	HAYS1JFT2-7_l500.fa-k119_608979	IS15_IS6_unknown	linG	IS15_IS6_unknown-linG	90	0	1	1	1
HAYS1JFT2-8	Broiler faeces	Chicken	Farm	Henan 1	Henan	k119_187388	HAYS1JFT2-8_l500.fa-k119_187388	IS15_IS6_unknown	linG	IS15_IS6_unknown-linG	90	0	1	1	1
HAYS1JFT1-5	Broiler faeces	Chicken	Farm	Henan 1	Henan	k119_254978	HAYS1JFT1-5_l500.fa-k119_254978	IS15_IS6_unknown	linG	IS15_IS6_unknown-linG	90	0	1	1	1
HAYS1JFT2-6	Broiler faeces	Chicken	Farm	Henan 1	Henan	k119_42850	HAYS1JFT2-6_l500.fa-k119_42850	IS15_IS6_unknown	linG	IS15_IS6_unknown-linG	90	0	1	1	1
HAYS2JFT2-13	Broiler faeces	Chicken	Farm	Henan 2	Henan	k119_111258	HAYS2JFT2-13_l500.fa-k119_111258	IS15_IS6_unknown	linG	IS15_IS6_unknown-linG	90	0	1	1	1
HAYS2JFT1-4	Broiler faeces	Chicken	Farm	Henan 2	Henan	k119_169947	HAYS2JFT1-4_l500.fa-k119_169947	IS15_IS6_unknown	linG	IS15_IS6_unknown-linG	90	0	1	1	1
HAYS2JFT1-8	Broiler faeces	Chicken	Farm	Henan 2	Henan	k119_275647	HAYS2JFT1-8_l500.fa-k119_275647	IS15_IS6_unknown	linG	IS15_IS6_unknown-linG	90	0	1	1	1
HAYS2JFT2-14	Broiler faeces	Chicken	Farm	Henan 2	Henan	k119_406728	HAYS2JFT2-14_l500.fa-k119_406728	IS15_IS6_unknown	linG	IS15_IS6_unknown-linG	90	0	1	1	1
HAYS2JFT2-4	Broiler faeces	Chicken	Farm	Henan 2	Henan	k119_436026	HAYS2JFT2-4_l500.fa-k119_436026	IS15_IS6_unknown	linG	IS15_IS6_unknown-linG	90	0	1	1	1
HAYS2JFT2-6	Broiler faeces	Chicken	Farm	Henan 2	Henan	k119_112777	HAYS2JFT2-6_l500.fa-k119_112777	IS15_IS6_unknown	linG	IS15_IS6_unknown-linG	90	0	1	1	1
HAYS2JFT1-14	Broiler faeces	Chicken	Farm	Henan 2	Henan	k119_6268	HAYS2JFT1-14_l500.fa-k119_6268	IS15_IS6_unknown	linG	IS15_IS6_unknown-linG	112	0	1	1	1
HAYS2YMT1-1	Broiler Feather	Chicken	Farm	Henan 2	Henan	k119_315895	HAYS2YMT1-1_l500.fa-k119_315895	IS15_IS6_unknown	linG	IS15_IS6_unknown-linG	90	0	1	1	1
HAYS2YMT1-2	Broiler Feather	Chicken	Farm	Henan 2	Henan	k119_393765	HAYS2YMT1-2_l500.fa-k119_393765	IS15_IS6_unknown	linG	IS15_IS6_unknown-linG	90	0	1	1	1
HAYS2YMT1-3	Broiler Feather	Chicken	Farm	Henan 2	Henan	k119_385520	HAYS2YMT1-3_l500.fa-k119_385520	IS15_IS6_unknown	linG	IS15_IS6_unknown-linG	90	0	1	1	1
HAYS2YMT1-4	Broiler Feather	Chicken	Farm	Henan 2	Henan	k119_307067	HAYS2YMT1-4_l500.fa-k119_307067	IS15_IS6_unknown	linG	IS15_IS6_unknown-linG	90	0	1	1	1
HAYS2YMT2-4	Broiler Feather	Chicken	Farm	Henan 2	Henan	k119_394999	HAYS2YMT2-4_l500.fa-k119_394999	IS15_IS6_unknown	linG	IS15_IS6_unknown-linG	90	0	1	1	1
HAYS2YMT2-5	Broiler Feather	Chicken	Farm	Henan 2	Henan	k119_462259	HAYS2YMT2-5_l500.fa-k119_462259	IS15_IS6_unknown	linG	IS15_IS6_unknown-linG	90	0	1	1	1
HAYS3JFT1-7	Broiler faeces	Chicken	Farm	Henan 3	Henan	k119_106399	HAYS3JFT1-7_l500.fa-k119_106399	IS15_IS6_unknown	linG	IS15_IS6_unknown-linG	90	0	1	1	1
HAYS3JFT1-13	Broiler faeces	Chicken	Farm	Henan 3	Henan	k119_37743	HAYS3JFT1-13_l500.fa-k119_37743	IS15_IS6_unknown	linG	IS15_IS6_unknown-linG	90	0	1	1	1
HAYS3JFT1-1	Broiler faeces	Chicken	Farm	Henan 3	Henan	k119_12366	HAYS3JFT1-1_l500.fa-k119_12366	IS15_IS6_unknown	linG	IS15_IS6_unknown-linG	90	0	1	1	1
HAYS3JFT1-8	Broiler faeces	Chicken	Farm	Henan 3	Henan	k119_1749450	HAYS3JFT1-8_l500.fa-k119_1749450	IS15_IS6_unknown	linG	IS15_IS6_unknown-linG	90	0	1	1	1
HAYS3JFT2-15	Broiler faeces	Chicken	Farm	Henan 3	Henan	k119_365862	HAYS3JFT2-15_l500.fa-k119_365862	IS15_IS6_unknown	linG	IS15_IS6_unknown-linG	90	0	1	1	1
HAYS3JFT2-3	Broiler faeces	Chicken	Farm	Henan 3	Henan	k119_12943	HAYS3JFT2-3_l500.fa-k119_12943	IS15_IS6_unknown	linG	IS15_IS6_unknown-linG	90	0	1	1	1
HAYS3JFT2-8	Broiler faeces	Chicken	Farm	Henan 3	Henan	k119_110928	HAYS3JFT2-8_l500.fa-k119_110928	IS15_IS6_unknown	linG	IS15_IS6_unknown-linG	90	0	1	1	1
HAYS3JFT1-15	Broiler faeces	Chicken	Farm	Henan 3	Henan	k119_203786	HAYS3JFT1-15_l500.fa-k119_203786	IS15_IS6_unknown	linG	IS15_IS6_unknown-linG	90	0	1	1	1
HAYS3JFT1-14	Broiler faeces	Chicken	Farm	Henan 3	Henan	k119_81076	HAYS3JFT1-14_l500.fa-k119_81076	IS15_IS6_unknown	linG	IS15_IS6_unknown-linG	90	0	1	1	1
HAYS3JFT2-1	Broiler faeces	Chicken	Farm	Henan 3	Henan	k119_129228	HAYS3JFT2-1_l500.fa-k119_129228	IS15_IS6_unknown	linG	IS15_IS6_unknown-linG	90	0	1	1	1
HAYS3JFT1-2	Broiler faeces	Chicken	Farm	Henan 3	Henan	k119_177941	HAYS3JFT1-2_l500.fa-k119_177941	IS15_IS6_unknown	linG	IS15_IS6_unknown-linG	90	0	1	1	1
HAYS3JFT2-11	Broiler faeces	Chicken	Farm	Henan 3	Henan	k119_168810	HAYS3JFT2-11_l500.fa-k119_168810	IS15_IS6_unknown	linG	IS15_IS6_unknown-linG	90	0	1	1	1
HAYS3YMT2-3	Broiler Feather	Chicken	Farm	Henan 3	Henan	k119_952168	HAYS3YMT2-3_l500.fa-k119_952168	IS15_IS6_unknown	linG	IS15_IS6_unknown-linG	90	0	1	1	1
HAYS3YMT2-4	Broiler Feather	Chicken	Farm	Henan 3	Henan	k119_843910	HAYS3YMT2-4_l500.fa-k119_843910	IS15_IS6_unknown	linG	IS15_IS6_unknown-linG	90	0	1	1	1
HAYS3YMT1-03	Broiler Feather	Chicken	Farm	Henan 3	Henan	k119_291678	HAYS3YMT1-03_l500.fa-k119_291678	IS15_IS6_unknown	linG	IS15_IS6_unknown-linG	90	0	1	1	1
HAYS3YMT1-04	Broiler Feather	Chicken	Farm	Henan 3	Henan	k119_546058	HAYS3YMT1-04_l500.fa-k119_546058	IS15_IS6_unknown	linG	IS15_IS6_unknown-linG	90	0	1	1	1
LNPCJFT1_10	Broiler faeces	Chicken	Farm	Liaoning 1	Liaoning	k119_92369	LNPCJFT1_10_l500.fa-k119_92369	IS15_IS6_unknown	linG	IS15_IS6_unknown-linG	90	0	1	1	1
LNPCJFT1_18	Broiler faeces	Chicken	Farm	Liaoning 1	Liaoning	k119_12118	LNPCJFT1_18_l500.fa-k119_12118	IS15_IS6_unknown	linG	IS15_IS6_unknown-linG	90	0	1	1	1
LNPCJFT1_01	Broiler faeces	Chicken	Farm	Liaoning 1	Liaoning	k119_51923	LNPCJFT1_01_l500.fa-k119_51923	IS15_IS6_unknown	linG	IS15_IS6_unknown-linG	90	0	1	1	1
LNPCJFT1_02	Broiler faeces	Chicken	Farm	Liaoning 1	Liaoning	k119_19312	LNPCJFT1_02_l500.fa-k119_19312	IS15_IS6_unknown	linG	IS15_IS6_unknown-linG	90	0	1	1	1
LNPCJFT1_08	Broiler faeces	Chicken	Farm	Liaoning 1	Liaoning	k119_378036	LNPCJFT1_08_l500.fa-k119_378036	IS15_IS6_unknown	linG	IS15_IS6_unknown-linG	90	0	1	1	1
LNPCJFT1_11	Broiler faeces	Chicken	Farm	Liaoning 1	Liaoning	k119_20115	LNPCJFT1_11_l500.fa-k119_20115	IS15_IS6_unknown	linG	IS15_IS6_unknown-linG	90	0	1	1	1
LNPCJFT1_17	Broiler faeces	Chicken	Farm	Liaoning 1	Liaoning	k119_79304	LNPCJFT1_17_l500.fa-k119_79304	IS15_IS6_unknown	linG	IS15_IS6_unknown-linG	90	0	1	1	1
LNPCJFT2_02	Broiler faeces	Chicken	Farm	Liaoning 1	Liaoning	k119_580756	LNPCJFT2_02_l500.fa-k119_580756	IS15_IS6_unknown	linG	IS15_IS6_unknown-linG	90	0	1	1	1
LNPCJFT2_03	Broiler faeces	Chicken	Farm	Liaoning 1	Liaoning	k119_112640	LNPCJFT2_03_l500.fa-k119_112640	IS15_IS6_unknown	linG	IS15_IS6_unknown-linG	90	0	1	1	1
LNPCJFT2_07	Broiler faeces	Chicken	Farm	Liaoning 1	Liaoning	k119_185691	LNPCJFT2_07_l500.fa-k119_185691	IS15_IS6_unknown	linG	IS15_IS6_unknown-linG	90	0	1	1	1
LNPCJFT2_09	Broiler faeces	Chicken	Farm	Liaoning 1	Liaoning	k119_77159	LNPCJFT2_09_l500.fa-k119_77159	IS15_IS6_unknown	linG	IS15_IS6_unknown-linG	90	0	1	1	1
LNPCJFT2_11	Broiler faeces	Chicken	Farm	Liaoning 1	Liaoning	k119_344905	LNPCJFT2_11_l500.fa-k119_344905	IS15_IS6_unknown	linG	IS15_IS6_unknown-linG	90	0	1	1	1
LNPCJFT2_17	Broiler faeces	Chicken	Farm	Liaoning 1	Liaoning	k119_170793	LNPCJFT2_17_l500.fa-k119_170793	IS15_IS6_unknown	linG	IS15_IS6_unknown-linG	90	0	1	1	1
LNPCJFT2_19	Broiler faeces	Chicken	Farm	Liaoning 1	Liaoning	k119_87043	LNPCJFT2_19_l500.fa-k119_87043	IS15_IS6_unknown	linG	IS15_IS6_unknown-linG	90	0	1	1	1
LNPCJFT1_04	Broiler faeces	Chicken	Farm	Liaoning 1	Liaoning	k119_658	LNPCJFT1_04_l500.fa-k119_658	IS15_IS6_unknown	linG	IS15_IS6_unknown-linG	90	0	1	1	1
LNTPDMT1_01	Barn Floor	Environment	Farm	Liaoning 2	Liaoning	k119_796650	LNTPDMT1_01_l500.fa-k119_796650	IS15_IS6_unknown	linG	IS15_IS6_unknown-linG	90	0	1	1	1
LNTPJFT1_06	Broiler faeces	Chicken	Farm	Liaoning 2	Liaoning	k119_110078	LNTPJFT1_06_l500.fa-k119_110078	IS15_IS6_unknown	linG	IS15_IS6_unknown-linG	90	0	1	1	1
LNTPJFT2_01	Broiler faeces	Chicken	Farm	Liaoning 2	Liaoning	k119_40433	LNTPJFT2_01_l500.fa-k119_40433	IS15_IS6_unknown	linG	IS15_IS6_unknown-linG	90	0	1	1	1
LNTPJFT2_11	Broiler faeces	Chicken	Farm	Liaoning 2	Liaoning	k119_6363	LNTPJFT2_11_l500.fa-k119_6363	IS15_IS6_unknown	linG	IS15_IS6_unknown-linG	90	0	1	1	1
LNTPJFT2_17	Broiler faeces	Chicken	Farm	Liaoning 2	Liaoning	k119_468286	LNTPJFT2_17_l500.fa-k119_468286	IS15_IS6_unknown	linG	IS15_IS6_unknown-linG	90	0	1	1	1
LNTPJFT2_13	Broiler faeces	Chicken	Farm	Liaoning 2	Liaoning	k119_209785	LNTPJFT2_13_l500.fa-k119_209785	IS15_IS6_unknown	linG	IS15_IS6_unknown-linG	90	0	1	1	1
LNLDDMT1-01	Barn Floor	Environment	Farm	Liaoning 3	Liaoning	k119_35342	LNLDDMT1-01_l500.fa-k119_35342	IS15_IS6_unknown	linG	IS15_IS6_unknown-linG	90	0	1	1	1
LNLDDMT1-02	Barn Floor	Environment	Farm	Liaoning 3	Liaoning	k119_206892	LNLDDMT1-02_l500.fa-k119_206892	IS15_IS6_unknown	linG	IS15_IS6_unknown-linG	90	0	1	1	1
LNLDJFT1-10	Broiler faeces	Chicken	Farm	Liaoning 3	Liaoning	k119_124174	LNLDJFT1-10_l500.fa-k119_124174	IS15_IS6_unknown	linG	IS15_IS6_unknown-linG	90	0	1	1	1
LNLDJFT1-14	Broiler faeces	Chicken	Farm	Liaoning 3	Liaoning	k119_342990	LNLDJFT1-14_l500.fa-k119_342990	IS15_IS6_unknown	linG	IS15_IS6_unknown-linG	90	0	1	1	1
LNLDJFT1-17	Broiler faeces	Chicken	Farm	Liaoning 3	Liaoning	k119_226227	LNLDJFT1-17_l500.fa-k119_226227	IS15_IS6_unknown	linG	IS15_IS6_unknown-linG	90	0	1	1	1
LNLDJFT1-20	Broiler faeces	Chicken	Farm	Liaoning 3	Liaoning	k119_137496	LNLDJFT1-20_l500.fa-k119_137496	IS15_IS6_unknown	linG	IS15_IS6_unknown-linG	90	0	1	1	1
LNLDJFT1-05	Broiler faeces	Chicken	Farm	Liaoning 3	Liaoning	k119_118697	LNLDJFT1-05_l500.fa-k119_118697	IS15_IS6_unknown	linG	IS15_IS6_unknown-linG	90	0	1	1	1
LNLDJFT2-11	Broiler faeces	Chicken	Farm	Liaoning 3	Liaoning	k119_245506	LNLDJFT2-11_l500.fa-k119_245506	IS15_IS6_unknown	linG	IS15_IS6_unknown-linG	90	0	1	1	1
PDJFT1S3L0304	Broiler faeces	Chicken	Farm	Shandong 1_1	Shandong	k119_14261	PDJFT1S3L0304_l500.fa-k119_14261	IS15_IS6_unknown	linG	IS15_IS6_unknown-linG	90	0	1	1	1
PDJFT1S3L0405	Broiler faeces	Chicken	Farm	Shandong 1_1	Shandong	k119_257147	PDJFT1S3L0405_l500.fa-k119_257147	IS15_IS6_unknown	linG	IS15_IS6_unknown-linG	90	0	1	1	1
PDJFT1S3L0406	Broiler faeces	Chicken	Farm	Shandong 1_1	Shandong	k119_384363	PDJFT1S3L0406_l500.fa-k119_384363	IS15_IS6_unknown	linG	IS15_IS6_unknown-linG	90	0	1	1	1
PDJFT1S3L0508	Broiler faeces	Chicken	Farm	Shandong 1_1	Shandong	k119_53620	PDJFT1S3L0508_l500.fa-k119_53620	IS15_IS6_unknown	linG	IS15_IS6_unknown-linG	90	0	1	1	1
PDJFT1S3L0609	Broiler faeces	Chicken	Farm	Shandong 1_1	Shandong	k119_1787	PDJFT1S3L0609_l500.fa-k119_1787	IS15_IS6_unknown	linG	IS15_IS6_unknown-linG	90	0	1	1	1
PDJFT1S3L0610	Broiler faeces	Chicken	Farm	Shandong 1_1	Shandong	k119_174442	PDJFT1S3L0610_l500.fa-k119_174442	IS15_IS6_unknown	linG	IS15_IS6_unknown-linG	90	0	1	1	1
PDJFT2S3L0101	Broiler faeces	Chicken	Farm	Shandong 1_1	Shandong	k119_99333	PDJFT2S3L0101_l500.fa-k119_99333	IS15_IS6_unknown	linG	IS15_IS6_unknown-linG	90	0	1	1	1
PDJFT2S3L0304	Broiler faeces	Chicken	Farm	Shandong 1_1	Shandong	k119_14148	PDJFT2S3L0304_l500.fa-k119_14148	IS15_IS6_unknown	linG	IS15_IS6_unknown-linG	90	0	1	1	1
PDJFT2S3L0507	Broiler faeces	Chicken	Farm	Shandong 1_1	Shandong	k119_160320	PDJFT2S3L0507_l500.fa-k119_160320	IS15_IS6_unknown	linG	IS15_IS6_unknown-linG	90	0	1	1	1
PDJFT2S3L0508	Broiler faeces	Chicken	Farm	Shandong 1_1	Shandong	k119_137529	PDJFT2S3L0508_l500.fa-k119_137529	IS15_IS6_unknown	linG	IS15_IS6_unknown-linG	90	0	1	1	1
PDJFT2S3L0609	Broiler faeces	Chicken	Farm	Shandong 1_1	Shandong	k119_117546	PDJFT2S3L0609_l500.fa-k119_117546	IS15_IS6_unknown	linG	IS15_IS6_unknown-linG	90	0	1	1	1
PDJFT2S4L0313	Broiler faeces	Chicken	Farm	Shandong 1_1	Shandong	k119_30490	PDJFT2S4L0313_l500.fa-k119_30490	IS15_IS6_unknown	linG	IS15_IS6_unknown-linG	90	0	1	1	1
PDJFT2S4L0414	Broiler faeces	Chicken	Farm	Shandong 1_1	Shandong	k119_46254	PDJFT2S4L0414_l500.fa-k119_46254	IS15_IS6_unknown	linG	IS15_IS6_unknown-linG	90	0	1	1	1
PDJFT1S3L0202	Broiler faeces	Chicken	Farm	Shandong 1_1	Shandong	k119_384472	PDJFT1S3L0202_l500.fa-k119_384472	IS15_IS6_unknown	linG	IS15_IS6_unknown-linG	90	0	1	1	1
PDJFT1S4L0212	Broiler faeces	Chicken	Farm	Shandong 1_1	Shandong	k119_78126	PDJFT1S4L0212_l500.fa-k119_78126	IS15_IS6_unknown	linG	IS15_IS6_unknown-linG	90	0	1	1	1
PDJFT1S4L0616	Broiler faeces	Chicken	Farm	Shandong 1_1	Shandong	k119_270414	PDJFT1S4L0616_l500.fa-k119_270414	IS15_IS6_unknown	linG	IS15_IS6_unknown-linG	90	0	1	1	1
PDJFT1S4L0819	Broiler faeces	Chicken	Farm	Shandong 1_1	Shandong	k119_64254	PDJFT1S4L0819_l500.fa-k119_64254	IS15_IS6_unknown	linG	IS15_IS6_unknown-linG	90	0	1	1	1
PDJFT2S4L0616	Broiler faeces	Chicken	Farm	Shandong 1_1	Shandong	k119_23271	PDJFT2S4L0616_l500.fa-k119_23271	IS15_IS6_unknown	linG	IS15_IS6_unknown-linG	90	0	1	1	1
PDJFT2S4L0819	Broiler faeces	Chicken	Farm	Shandong 1_1	Shandong	k119_33911	PDJFT2S4L0819_l500.fa-k119_33911	IS15_IS6_unknown	linG	IS15_IS6_unknown-linG	90	0	1	1	1
PDJFT2S3L0406	Broiler faeces	Chicken	Farm	Shandong 1_1	Shandong	k119_89087	PDJFT2S3L0406_l500.fa-k119_89087	IS15_IS6_unknown	linG	IS15_IS6_unknown-linG	112	0	1	1	1
PDJFL1A6	Broiler faeces	Chicken	Farm	Shandong 1_2	Shandong	k119_28677	PDJFL1A6_l500.fa-k119_28677	IS15_IS6_unknown	linG	IS15_IS6_unknown-linG	90	0	1	1	1
PDJFL1A4	Broiler faeces	Chicken	Farm	Shandong 1_2	Shandong	k119_275955	PDJFL1A4_l500.fa-k119_275955	IS15_IS6_unknown	linG	IS15_IS6_unknown-linG	90	0	1	1	1
PDJFL2C3	Broiler faeces	Chicken	Farm	Shandong 1_2	Shandong	k119_1951	PDJFL2C3_l500.fa-k119_1951	IS15_IS6_unknown	linG	IS15_IS6_unknown-linG	90	0	1	1	1
PDJFL1A1	Broiler faeces	Chicken	Farm	Shandong 1_2	Shandong	k119_35400	PDJFL1A1_l500.fa-k119_35400	IS15_IS6_unknown	linG	IS15_IS6_unknown-linG	90	0	1	1	1
PDJFL1A2	Broiler faeces	Chicken	Farm	Shandong 1_2	Shandong	k119_49871	PDJFL1A2_l500.fa-k119_49871	IS15_IS6_unknown	linG	IS15_IS6_unknown-linG	90	0	1	1	1
PDJFL1A5	Broiler faeces	Chicken	Farm	Shandong 1_2	Shandong	k119_126623	PDJFL1A5_l500.fa-k119_126623	IS15_IS6_unknown	linG	IS15_IS6_unknown-linG	90	0	1	1	1
PDJFL1C3	Broiler faeces	Chicken	Farm	Shandong 1_2	Shandong	k119_459939	PDJFL1C3_l500.fa-k119_459939	IS15_IS6_unknown	linG	IS15_IS6_unknown-linG	90	0	1	1	1
PDJFL1C4	Broiler faeces	Chicken	Farm	Shandong 1_2	Shandong	k119_24753	PDJFL1C4_l500.fa-k119_24753	IS15_IS6_unknown	linG	IS15_IS6_unknown-linG	90	0	1	1	1
PDJFL1C6	Broiler faeces	Chicken	Farm	Shandong 1_2	Shandong	k119_42826	PDJFL1C6_l500.fa-k119_42826	IS15_IS6_unknown	linG	IS15_IS6_unknown-linG	90	0	1	1	1
PDJFL2A1	Broiler faeces	Chicken	Farm	Shandong 1_2	Shandong	k119_262713	PDJFL2A1_l500.fa-k119_262713	IS15_IS6_unknown	linG	IS15_IS6_unknown-linG	90	0	1	1	1
PDJFL2A2	Broiler faeces	Chicken	Farm	Shandong 1_2	Shandong	k119_392768	PDJFL2A2_l500.fa-k119_392768	IS15_IS6_unknown	linG	IS15_IS6_unknown-linG	90	0	1	1	1
PDJFL2C5	Broiler faeces	Chicken	Farm	Shandong 1_2	Shandong	k119_139138	PDJFL2C5_l500.fa-k119_139138	IS15_IS6_unknown	linG	IS15_IS6_unknown-linG	90	0	1	1	1
PDJFL1C2	Broiler faeces	Chicken	Farm	Shandong 1_2	Shandong	k119_184244	PDJFL1C2_l500.fa-k119_184244	IS15_IS6_unknown	linG	IS15_IS6_unknown-linG	90	0	1	1	1
PDJFL1A3	Broiler faeces	Chicken	Farm	Shandong 1_2	Shandong	k119_29023	PDJFL1A3_l500.fa-k119_29023	IS15_IS6_unknown	linG	IS15_IS6_unknown-linG	90	0	1	1	1
PDJFL1C1	Broiler faeces	Chicken	Farm	Shandong 1_2	Shandong	k119_46574	PDJFL1C1_l500.fa-k119_46574	IS15_IS6_unknown	linG	IS15_IS6_unknown-linG	112	0	1	1	1
PDJFL2C1	Broiler faeces	Chicken	Farm	Shandong 1_2	Shandong	k119_329531	PDJFL2C1_l500.fa-k119_329531	IS15_IS6_unknown	linG	IS15_IS6_unknown-linG	1725	0	1	1	1
SDPD1JFT1.09	Broiler faeces	Chicken	Farm	Shandong 2	Shandong	k119_82721	SDPD1JFT1.09_l500.fa-k119_82721	IS15_IS6_unknown	linG	IS15_IS6_unknown-linG	90	0	1	1	1
SDPD1JFT2.01	Broiler faeces	Chicken	Farm	Shandong 2	Shandong	k119_304999	SDPD1JFT2.01_l500.fa-k119_304999	IS15_IS6_unknown	linG	IS15_IS6_unknown-linG	90	0	1	1	1
SDPD1JFT1.12	Broiler faeces	Chicken	Farm	Shandong 2	Shandong	k119_71067	SDPD1JFT1.12_l500.fa-k119_71067	IS15_IS6_unknown	linG	IS15_IS6_unknown-linG	90	0	1	1	1
SDPD1JFT2.14	Broiler faeces	Chicken	Farm	Shandong 2	Shandong	k119_621009	SDPD1JFT2.14_l500.fa-k119_621009	IS15_IS6_unknown	linG	IS15_IS6_unknown-linG	90	0	1	1	1
SDPD1JFT1.06	Broiler faeces	Chicken	Farm	Shandong 2	Shandong	k119_95657	SDPD1JFT1.06_l500.fa-k119_95657	IS15_IS6_unknown	linG	IS15_IS6_unknown-linG	112	0	1	1	1
SDPD1YMT1.04	Broiler Feather	Chicken	Farm	Shandong 2	Shandong	k119_531668	SDPD1YMT1.04_l500.fa-k119_531668	IS15_IS6_unknown	linG	IS15_IS6_unknown-linG	90	0	1	1	1
SDPD1YMT1.02	Broiler Feather	Chicken	Farm	Shandong 2	Shandong	k119_357407	SDPD1YMT1.02_l500.fa-k119_357407	IS15_IS6_unknown	linG	IS15_IS6_unknown-linG	90	0	1	1	1
SDPD3JFT1-20	Broiler faeces	Chicken	Farm	Shandong 3	Shandong	k119_174668	SDPD3JFT1-20_l500.fa-k119_174668	IS15_IS6_unknown	linG	IS15_IS6_unknown-linG	90	0	1	1	1
SDPD3JFT2-01	Broiler faeces	Chicken	Farm	Shandong 3	Shandong	k119_24635	SDPD3JFT2-01_l500.fa-k119_24635	IS15_IS6_unknown	linG	IS15_IS6_unknown-linG	90	0	1	1	1
SDPD3JFT1-19	Broiler faeces	Chicken	Farm	Shandong 3	Shandong	k119_152759	SDPD3JFT1-19_l500.fa-k119_152759	IS15_IS6_unknown	linG	IS15_IS6_unknown-linG	90	0	1	1	1
SDPD3JFT2-09	Broiler faeces	Chicken	Farm	Shandong 3	Shandong	k119_36429	SDPD3JFT2-09_l500.fa-k119_36429	IS15_IS6_unknown	linG	IS15_IS6_unknown-linG	228	0	1	1	1
SDPD3TWT3-01	Wastewater	Environment	Slaughterhouse	Shandong 3	Shandong	k119_506218	SDPD3TWT3-01_l500.fa-k119_506218	IS15_IS6_unknown	linG	IS15_IS6_unknown-linG	90	0	1	1	1
SDPD4JFT1-01	Broiler faeces	Chicken	Farm	Shandong 4	Shandong	k119_743493	SDPD4JFT1-01_l500.fa-k119_743493	IS15_IS6_unknown	linG	IS15_IS6_unknown-linG	90	0	1	1	1
SDPD4JFT2-01	Broiler faeces	Chicken	Farm	Shandong 4	Shandong	k119_377454	SDPD4JFT2-01_l500.fa-k119_377454	IS15_IS6_unknown	linG	IS15_IS6_unknown-linG	90	0	1	1	1
SDPD4JFT2-09	Broiler faeces	Chicken	Farm	Shandong 4	Shandong	k119_351764	SDPD4JFT2-09_l500.fa-k119_351764	IS15_IS6_unknown	linG	IS15_IS6_unknown-linG	90	0	1	1	1
SDPD4YMT1-03	Broiler Feather	Chicken	Farm	Shandong 4	Shandong	k119_145026	SDPD4YMT1-03_l500.fa-k119_145026	IS15_IS6_unknown	linG	IS15_IS6_unknown-linG	90	0	1	1	1
HAYS2TRT2-2	Soil	Environment	Farm	Henan 2	Henan	k119_960958	HAYS2TRT2-2_l500.fa-k119_960958	IS15_IS6_unknown	mphF	IS15_IS6_unknown-mphF	1454	0	1	1	1
LNPCJFT1_17	Broiler faeces	Chicken	Farm	Liaoning 1	Liaoning	k119_2659	LNPCJFT1_17_l500.fa-k119_2659	IS15_IS6_unknown	mphF	IS15_IS6_unknown-mphF	1455	0	1	1	1
LNTPDMT1_01	Barn Floor	Environment	Farm	Liaoning 2	Liaoning	k119_1294135	LNTPDMT1_01_l500.fa-k119_1294135	IS15_IS6_unknown	mphF	IS15_IS6_unknown-mphF	1454	0	1	1	1
LNTPDMT1_03	Barn Floor	Environment	Farm	Liaoning 2	Liaoning	k119_994829	LNTPDMT1_03_l500.fa-k119_994829	IS15_IS6_unknown	mphF	IS15_IS6_unknown-mphF	1454	0	1	1	1
LNTPTRT1_01	Soil	Environment	Farm	Liaoning 2	Liaoning	k119_754547	LNTPTRT1_01_l500.fa-k119_754547	IS15_IS6_unknown	mphF	IS15_IS6_unknown-mphF	1282	0	1	1	1
LNLDDMT2-01	Barn Floor	Environment	Farm	Liaoning 3	Liaoning	k119_184868	LNLDDMT2-01_l500.fa-k119_184868	IS15_IS6_unknown	mphF	IS15_IS6_unknown-mphF	1454	0	1	1	1
LNLDDMT2-02	Barn Floor	Environment	Farm	Liaoning 3	Liaoning	k119_756234	LNLDDMT2-02_l500.fa-k119_756234	IS15_IS6_unknown	mphF	IS15_IS6_unknown-mphF	1454	0	1	1	1
LNLDDMT2-03	Barn Floor	Environment	Farm	Liaoning 3	Liaoning	k119_137528	LNLDDMT2-03_l500.fa-k119_137528	IS15_IS6_unknown	mphF	IS15_IS6_unknown-mphF	1454	0	1	1	1
SDPD3HCT2-02	Barn Floor	Environment	Farm	Shandong 3	Shandong	k119_655212	SDPD3HCT2-02_l500.fa-k119_655212	IS15_IS6_unknown	mphF	IS15_IS6_unknown-mphF	1454	0	1	1	1
SDPD4HCT1-02	Barn Floor	Environment	Farm	Shandong 4	Shandong	k119_618069	SDPD4HCT1-02_l500.fa-k119_618069	IS15_IS6_unknown	mphF	IS15_IS6_unknown-mphF	1454	0	1	1	1
SDPD4JFT1-08	Broiler faeces	Chicken	Farm	Shandong 4	Shandong	k119_5567	SDPD4JFT1-08_l500.fa-k119_5567	IS15_IS6_unknown	mphF	IS15_IS6_unknown-mphF	1454	0	1	1	1
SDPD4YMT1-05	Broiler Feather	Chicken	Farm	Shandong 4	Shandong	k119_306016	SDPD4YMT1-05_l500.fa-k119_306016	IS15_IS6_unknown	mphF	IS15_IS6_unknown-mphF	1454	0	1	1	1
LNPCJFT1_08	Broiler faeces	Chicken	Farm	Liaoning 1	Liaoning	k119_401593	LNPCJFT1_08_l500.fa-k119_401593	IS15_IS6_unknown	NDM-1	IS15_IS6_unknown-NDM-1	91	0	1	1	1
LNPCJFT2_17	Broiler faeces	Chicken	Farm	Liaoning 1	Liaoning	k119_10123	LNPCJFT2_17_l500.fa-k119_10123	IS15_IS6_unknown	NDM-1	IS15_IS6_unknown-NDM-1	2189	0	1	1	1
LNPCJFT1_17	Broiler faeces	Chicken	Farm	Liaoning 1	Liaoning	k119_2717	LNPCJFT1_17_l500.fa-k119_2717	IS15_IS6_unknown	NDM-1	IS15_IS6_unknown-NDM-1	2189	0	1	1	1
LNLDDMT1-01	Barn Floor	Environment	Farm	Liaoning 3	Liaoning	k119_226436	LNLDDMT1-01_l500.fa-k119_226436	IS15_IS6_unknown	NDM-1	IS15_IS6_unknown-NDM-1	2189	0	1	1	1
LNLDDMT1-02	Barn Floor	Environment	Farm	Liaoning 3	Liaoning	k119_373660	LNLDDMT1-02_l500.fa-k119_373660	IS15_IS6_unknown	NDM-1	IS15_IS6_unknown-NDM-1	2189	0	1	1	1
HAYS1JFT2-3	Broiler faeces	Chicken	Farm	Henan 1	Henan	k119_365150	HAYS1JFT2-3_l500.fa-k119_365150	IS15_IS6_unknown	NDM-5	IS15_IS6_unknown-NDM-5	232	1	1	1	0
HAYS1JFT2-2	Broiler faeces	Chicken	Farm	Henan 1	Henan	k119_59995	HAYS1JFT2-2_l500.fa-k119_59995	IS15_IS6_unknown	NDM-5	IS15_IS6_unknown-NDM-5	232	1	1	1	0
HAYS1JFT1-5	Broiler faeces	Chicken	Farm	Henan 1	Henan	k119_214434	HAYS1JFT1-5_l500.fa-k119_214434	IS15_IS6_unknown	NDM-5	IS15_IS6_unknown-NDM-5	2189	1	1	1	0
HAYS1JFT1-6	Broiler faeces	Chicken	Farm	Henan 1	Henan	k119_143930	HAYS1JFT1-6_l500.fa-k119_143930	IS15_IS6_unknown	NDM-5	IS15_IS6_unknown-NDM-5	2189	1	1	1	0
HAYS3HCT2-2	Barn Floor	Environment	Farm	Henan 3	Henan	k119_845149	HAYS3HCT2-2_l500.fa-k119_845149	IS15_IS6_unknown	NDM-5	IS15_IS6_unknown-NDM-5	2189	1	1	1	0
HAYS3JFT1-14	Broiler faeces	Chicken	Farm	Henan 3	Henan	k119_137488	HAYS3JFT1-14_l500.fa-k119_137488	IS15_IS6_unknown	NDM-5	IS15_IS6_unknown-NDM-5	2189	1	1	1	0
HAYS3YMT2-3	Broiler Feather	Chicken	Farm	Henan 3	Henan	k119_996794	HAYS3YMT2-3_l500.fa-k119_996794	IS15_IS6_unknown	NDM-5	IS15_IS6_unknown-NDM-5	2189	1	1	1	0
LNPCJFT2_10	Broiler faeces	Chicken	Farm	Liaoning 1	Liaoning	k119_732063	LNPCJFT2_10_l500.fa-k119_732063	IS15_IS6_unknown	NDM-5	IS15_IS6_unknown-NDM-5	2189	1	1	1	0
LNPCJFT2_11	Broiler faeces	Chicken	Farm	Liaoning 1	Liaoning	k119_153373	LNPCJFT2_11_l500.fa-k119_153373	IS15_IS6_unknown	NDM-5	IS15_IS6_unknown-NDM-5	2189	1	1	1	0
SDPD1JFT1.15	Broiler faeces	Chicken	Farm	Shandong 2	Shandong	k119_544104	SDPD1JFT1.15_l500.fa-k119_544104	IS15_IS6_unknown	NDM-5	IS15_IS6_unknown-NDM-5	232	1	1	1	0
SDPD1JFT1.07	Broiler faeces	Chicken	Farm	Shandong 2	Shandong	k119_68357	SDPD1JFT1.07_l500.fa-k119_68357	IS15_IS6_unknown	NDM-5	IS15_IS6_unknown-NDM-5	2189	1	1	1	0
SDPD1JFT1.08	Broiler faeces	Chicken	Farm	Shandong 2	Shandong	k119_59734	SDPD1JFT1.08_l500.fa-k119_59734	IS15_IS6_unknown	NDM-5	IS15_IS6_unknown-NDM-5	2189	1	1	1	0
SDPD1JFT1.06	Broiler faeces	Chicken	Farm	Shandong 2	Shandong	k119_95797	SDPD1JFT1.06_l500.fa-k119_95797	IS15_IS6_unknown	NDM-5	IS15_IS6_unknown-NDM-5	2189	1	1	1	0
SDPD1JFT2.01	Broiler faeces	Chicken	Farm	Shandong 2	Shandong	k119_78060	SDPD1JFT2.01_l500.fa-k119_78060	IS15_IS6_unknown	NDM-5	IS15_IS6_unknown-NDM-5	2189	1	1	1	0
HAYS1JFT2-1	Broiler faeces	Chicken	Farm	Henan 1	Henan	k119_122923	HAYS1JFT2-1_l500.fa-k119_122923	IS15_IS6_unknown	OXA-1	IS15_IS6_unknown-OXA-1	777	1	1	1	0
HAYS1JFT1-8	Broiler faeces	Chicken	Farm	Henan 1	Henan	k119_348675	HAYS1JFT1-8_l500.fa-k119_348675	IS15_IS6_unknown	OXA-1	IS15_IS6_unknown-OXA-1	777	1	1	1	0
HAYS1JFT1-5	Broiler faeces	Chicken	Farm	Henan 1	Henan	k119_351847	HAYS1JFT1-5_l500.fa-k119_351847	IS15_IS6_unknown	OXA-1	IS15_IS6_unknown-OXA-1	777	1	1	1	0
HAYS1JFT1-1	Broiler faeces	Chicken	Farm	Henan 1	Henan	k119_45662	HAYS1JFT1-1_l500.fa-k119_45662	IS15_IS6_unknown	OXA-1	IS15_IS6_unknown-OXA-1	777	1	1	1	0
HAYS1JFT1-7	Broiler faeces	Chicken	Farm	Henan 1	Henan	k119_134359	HAYS1JFT1-7_l500.fa-k119_134359	IS15_IS6_unknown	OXA-1	IS15_IS6_unknown-OXA-1	777	1	1	1	0
HAYS2YMT2-1	Broiler Feather	Chicken	Farm	Henan 2	Henan	k119_207144	HAYS2YMT2-1_l500.fa-k119_207144	IS15_IS6_unknown	OXA-1	IS15_IS6_unknown-OXA-1	777	1	1	1	0
HAYS2YMT2-5	Broiler Feather	Chicken	Farm	Henan 2	Henan	k119_789306	HAYS2YMT2-5_l500.fa-k119_789306	IS15_IS6_unknown	OXA-1	IS15_IS6_unknown-OXA-1	777	1	1	1	0
HAYS3JFT1-1	Broiler faeces	Chicken	Farm	Henan 3	Henan	k119_37675	HAYS3JFT1-1_l500.fa-k119_37675	IS15_IS6_unknown	OXA-1	IS15_IS6_unknown-OXA-1	777	1	1	1	0
HAYS3JFT1-2	Broiler faeces	Chicken	Farm	Henan 3	Henan	k119_66334	HAYS3JFT1-2_l500.fa-k119_66334	IS15_IS6_unknown	OXA-1	IS15_IS6_unknown-OXA-1	777	1	1	1	0
HAYS3JFT1-3	Broiler faeces	Chicken	Farm	Henan 3	Henan	k119_15090	HAYS3JFT1-3_l500.fa-k119_15090	IS15_IS6_unknown	OXA-1	IS15_IS6_unknown-OXA-1	777	1	1	1	0
HAYS3JFT2-8	Broiler faeces	Chicken	Farm	Henan 3	Henan	k119_26622	HAYS3JFT2-8_l500.fa-k119_26622	IS15_IS6_unknown	OXA-1	IS15_IS6_unknown-OXA-1	777	1	1	1	0
HAYS3YMT2-4	Broiler Feather	Chicken	Farm	Henan 3	Henan	k119_1382295	HAYS3YMT2-4_l500.fa-k119_1382295	IS15_IS6_unknown	OXA-1	IS15_IS6_unknown-OXA-1	777	1	1	1	0
LNTPJFT1_16	Broiler faeces	Chicken	Farm	Liaoning 2	Liaoning	k119_205643	LNTPJFT1_16_l500.fa-k119_205643	IS15_IS6_unknown	OXA-1	IS15_IS6_unknown-OXA-1	777	1	1	1	0
LNTPJFT1_19	Broiler faeces	Chicken	Farm	Liaoning 2	Liaoning	k119_202148	LNTPJFT1_19_l500.fa-k119_202148	IS15_IS6_unknown	OXA-1	IS15_IS6_unknown-OXA-1	777	1	1	1	0
LNTPJFT2_17	Broiler faeces	Chicken	Farm	Liaoning 2	Liaoning	k119_219996	LNTPJFT2_17_l500.fa-k119_219996	IS15_IS6_unknown	OXA-1	IS15_IS6_unknown-OXA-1	777	1	1	1	0
LNTPJFT2_13	Broiler faeces	Chicken	Farm	Liaoning 2	Liaoning	k119_94918	LNTPJFT2_13_l500.fa-k119_94918	IS15_IS6_unknown	OXA-1	IS15_IS6_unknown-OXA-1	777	1	1	1	0
LNLDDMT1-01	Barn Floor	Environment	Farm	Liaoning 3	Liaoning	k119_336317	LNLDDMT1-01_l500.fa-k119_336317	IS15_IS6_unknown	OXA-1	IS15_IS6_unknown-OXA-1	777	1	1	1	0
PDJFT2S3L0508	Broiler faeces	Chicken	Farm	Shandong 1_1	Shandong	k119_219765	PDJFT2S3L0508_l500.fa-k119_219765	IS15_IS6_unknown	OXA-1	IS15_IS6_unknown-OXA-1	777	1	1	1	0
PDJFT1S3L0405	Broiler faeces	Chicken	Farm	Shandong 1_1	Shandong	k119_140756	PDJFT1S3L0405_l500.fa-k119_140756	IS15_IS6_unknown	OXA-1	IS15_IS6_unknown-OXA-1	777	1	1	1	0
PDJFL2C1	Broiler faeces	Chicken	Farm	Shandong 1_2	Shandong	k119_301999	PDJFL2C1_l500.fa-k119_301999	IS15_IS6_unknown	OXA-1	IS15_IS6_unknown-OXA-1	777	1	1	1	0
PDJFL1A2	Broiler faeces	Chicken	Farm	Shandong 1_2	Shandong	k119_63338	PDJFL1A2_l500.fa-k119_63338	IS15_IS6_unknown	OXA-1	IS15_IS6_unknown-OXA-1	777	1	1	1	0
PDJFL1A6	Broiler faeces	Chicken	Farm	Shandong 1_2	Shandong	k119_67067	PDJFL1A6_l500.fa-k119_67067	IS15_IS6_unknown	OXA-1	IS15_IS6_unknown-OXA-1	777	1	1	1	0
PDJFL1C6	Broiler faeces	Chicken	Farm	Shandong 1_2	Shandong	k119_102241	PDJFL1C6_l500.fa-k119_102241	IS15_IS6_unknown	OXA-1	IS15_IS6_unknown-OXA-1	777	1	1	1	0
PDJFL1C3	Broiler faeces	Chicken	Farm	Shandong 1_2	Shandong	k119_213908	PDJFL1C3_l500.fa-k119_213908	IS15_IS6_unknown	OXA-1	IS15_IS6_unknown-OXA-1	777	1	1	1	0
PDJFL1A1	Broiler faeces	Chicken	Farm	Shandong 1_2	Shandong	k119_5702	PDJFL1A1_l500.fa-k119_5702	IS15_IS6_unknown	OXA-1	IS15_IS6_unknown-OXA-1	777	1	1	1	0
PDJFL2C4	Broiler faeces	Chicken	Farm	Shandong 1_2	Shandong	k119_127226	PDJFL2C4_l500.fa-k119_127226	IS15_IS6_unknown	OXA-1	IS15_IS6_unknown-OXA-1	777	1	1	1	0
PDJFL2C5	Broiler faeces	Chicken	Farm	Shandong 1_2	Shandong	k119_264398	PDJFL2C5_l500.fa-k119_264398	IS15_IS6_unknown	OXA-1	IS15_IS6_unknown-OXA-1	777	1	1	1	0
SDPD1JTT3.14	Broiler carcass	Chicken	Slaughterhouse	Shandong 2	Shandong	k119_83892	SDPD1JTT3.14_l500.fa-k119_83892	IS15_IS6_unknown	OXA-1	IS15_IS6_unknown-OXA-1	777	1	1	1	0
SDPD1JTT3.15	Broiler carcass	Chicken	Slaughterhouse	Shandong 2	Shandong	k119_500554	SDPD1JTT3.15_l500.fa-k119_500554	IS15_IS6_unknown	OXA-1	IS15_IS6_unknown-OXA-1	777	1	1	1	0
SDPD1JFT1.02	Broiler faeces	Chicken	Farm	Shandong 2	Shandong	k119_37899	SDPD1JFT1.02_l500.fa-k119_37899	IS15_IS6_unknown	OXA-1	IS15_IS6_unknown-OXA-1	777	1	1	1	0
SDPD1JFT1.06	Broiler faeces	Chicken	Farm	Shandong 2	Shandong	k119_352485	SDPD1JFT1.06_l500.fa-k119_352485	IS15_IS6_unknown	OXA-1	IS15_IS6_unknown-OXA-1	777	1	1	1	0
SDPD1JFT2.12	Broiler faeces	Chicken	Farm	Shandong 2	Shandong	k119_272836	SDPD1JFT2.12_l500.fa-k119_272836	IS15_IS6_unknown	OXA-1	IS15_IS6_unknown-OXA-1	777	1	1	1	0
SDPD1JFT1.15	Broiler faeces	Chicken	Farm	Shandong 2	Shandong	k119_242846	SDPD1JFT1.15_l500.fa-k119_242846	IS15_IS6_unknown	OXA-1	IS15_IS6_unknown-OXA-1	777	1	1	1	0
SDPD3JFT1-03	Broiler faeces	Chicken	Farm	Shandong 3	Shandong	k119_164723	SDPD3JFT1-03_l500.fa-k119_164723	IS15_IS6_unknown	OXA-1	IS15_IS6_unknown-OXA-1	777	1	1	1	0
SDPD3JFT1-13	Broiler faeces	Chicken	Farm	Shandong 3	Shandong	k119_158658	SDPD3JFT1-13_l500.fa-k119_158658	IS15_IS6_unknown	OXA-1	IS15_IS6_unknown-OXA-1	777	1	1	1	0
LNLDJFT1-03	Broiler faeces	Chicken	Farm	Liaoning 3	Liaoning	k119_308447	LNLDJFT1-03_l500.fa-k119_308447	IS15_IS6_unknown	QnrA1	IS15_IS6_unknown-QnrA1	61	1	1	1	0
LNLDJFT1-07	Broiler faeces	Chicken	Farm	Liaoning 3	Liaoning	k119_351621	LNLDJFT1-07_l500.fa-k119_351621	IS15_IS6_unknown	QnrA1	IS15_IS6_unknown-QnrA1	61	1	1	1	0
SDPD4JFT1-18	Broiler faeces	Chicken	Farm	Shandong 4	Shandong	k119_540356	SDPD4JFT1-18_l500.fa-k119_540356	IS15_IS6_unknown	QnrA1	IS15_IS6_unknown-QnrA1	61	1	1	1	0
SDPD4JFT2-01	Broiler faeces	Chicken	Farm	Shandong 4	Shandong	k119_398014	SDPD4JFT2-01_l500.fa-k119_398014	IS15_IS6_unknown	QnrA1	IS15_IS6_unknown-QnrA1	61	1	1	1	0
SDPD4JFT2-03	Broiler faeces	Chicken	Farm	Shandong 4	Shandong	k119_759939	SDPD4JFT2-03_l500.fa-k119_759939	IS15_IS6_unknown	QnrA1	IS15_IS6_unknown-QnrA1	61	1	1	1	0
SDPD4JFT2-09	Broiler faeces	Chicken	Farm	Shandong 4	Shandong	k119_785135	SDPD4JFT2-09_l500.fa-k119_785135	IS15_IS6_unknown	QnrA1	IS15_IS6_unknown-QnrA1	61	1	1	1	0
SDPD4JFT2-17	Broiler faeces	Chicken	Farm	Shandong 4	Shandong	k119_251052	SDPD4JFT2-17_l500.fa-k119_251052	IS15_IS6_unknown	QnrA1	IS15_IS6_unknown-QnrA1	61	1	1	1	0
HAYS1JFT1-2	Broiler faeces	Chicken	Farm	Henan 1	Henan	k119_154543	HAYS1JFT1-2_l500.fa-k119_154543	IS15_IS6_unknown	QnrS2	IS15_IS6_unknown-QnrS2	837	1	1	1	0
HAYS1JFT1-5	Broiler faeces	Chicken	Farm	Henan 1	Henan	k119_201890	HAYS1JFT1-5_l500.fa-k119_201890	IS15_IS6_unknown	QnrS2	IS15_IS6_unknown-QnrS2	837	1	1	1	0
HAYS3JFT2-1	Broiler faeces	Chicken	Farm	Henan 3	Henan	k119_233807	HAYS3JFT2-1_l500.fa-k119_233807	IS15_IS6_unknown	QnrS2	IS15_IS6_unknown-QnrS2	458	1	1	1	0
LNTPJFT1_06	Broiler faeces	Chicken	Farm	Liaoning 2	Liaoning	k119_150345	LNTPJFT1_06_l500.fa-k119_150345	IS15_IS6_unknown	QnrS2	IS15_IS6_unknown-QnrS2	458	1	1	1	0
LNTPJFT1_16	Broiler faeces	Chicken	Farm	Liaoning 2	Liaoning	k119_289677	LNTPJFT1_16_l500.fa-k119_289677	IS15_IS6_unknown	QnrS2	IS15_IS6_unknown-QnrS2	458	1	1	1	0
LNTPJFT1_02	Broiler faeces	Chicken	Farm	Liaoning 2	Liaoning	k119_322197	LNTPJFT1_02_l500.fa-k119_322197	IS15_IS6_unknown	QnrS2	IS15_IS6_unknown-QnrS2	458	1	1	1	0
LNTPJFT2_15	Broiler faeces	Chicken	Farm	Liaoning 2	Liaoning	k119_13090	LNTPJFT2_15_l500.fa-k119_13090	IS15_IS6_unknown	QnrS2	IS15_IS6_unknown-QnrS2	458	1	1	1	0
LNTPJFT1_04	Broiler faeces	Chicken	Farm	Liaoning 2	Liaoning	k119_18476	LNTPJFT1_04_l500.fa-k119_18476	IS15_IS6_unknown	QnrS2	IS15_IS6_unknown-QnrS2	458	1	1	1	0
SDPD1JFT1.14	Broiler faeces	Chicken	Farm	Shandong 2	Shandong	k119_188819	SDPD1JFT1.14_l500.fa-k119_188819	IS15_IS6_unknown	QnrS2	IS15_IS6_unknown-QnrS2	458	1	1	1	0
SDPD1JFT1.15	Broiler faeces	Chicken	Farm	Shandong 2	Shandong	k119_243250	SDPD1JFT1.15_l500.fa-k119_243250	IS15_IS6_unknown	QnrS2	IS15_IS6_unknown-QnrS2	458	1	1	1	0
SDPD1JFT1.02	Broiler faeces	Chicken	Farm	Shandong 2	Shandong	k119_189080	SDPD1JFT1.02_l500.fa-k119_189080	IS15_IS6_unknown	QnrS2	IS15_IS6_unknown-QnrS2	837	1	1	1	0
SDPD1JFT1.05	Broiler faeces	Chicken	Farm	Shandong 2	Shandong	k119_122963	SDPD1JFT1.05_l500.fa-k119_122963	IS15_IS6_unknown	QnrS2	IS15_IS6_unknown-QnrS2	880	1	1	1	0
SDPD1JFT1.12	Broiler faeces	Chicken	Farm	Shandong 2	Shandong	k119_93600	SDPD1JFT1.12_l500.fa-k119_93600	IS15_IS6_unknown	QnrS2	IS15_IS6_unknown-QnrS2	880	1	1	1	0
SDPD1JFT1.07	Broiler faeces	Chicken	Farm	Shandong 2	Shandong	k119_32119	SDPD1JFT1.07_l500.fa-k119_32119	IS15_IS6_unknown	QnrS2	IS15_IS6_unknown-QnrS2	880	1	1	1	0
SDPD1YMT1.02	Broiler Feather	Chicken	Farm	Shandong 2	Shandong	k119_5258	SDPD1YMT1.02_l500.fa-k119_5258	IS15_IS6_unknown	QnrS2	IS15_IS6_unknown-QnrS2	458	1	1	1	0
SDPD1YMT1.03	Broiler Feather	Chicken	Farm	Shandong 2	Shandong	k119_145438	SDPD1YMT1.03_l500.fa-k119_145438	IS15_IS6_unknown	QnrS2	IS15_IS6_unknown-QnrS2	837	1	1	1	0
SDPD4JFT2-09	Broiler faeces	Chicken	Farm	Shandong 4	Shandong	k119_762961	SDPD4JFT2-09_l500.fa-k119_762961	IS15_IS6_unknown	QnrS2	IS15_IS6_unknown-QnrS2	837	1	1	1	0
LNLHJTT3-4	Broiler carcass	Chicken	Slaughterhouse	Liaoning 3	Liaoning	k119_354167	LNLHJTT3-4_l500.fa-k119_354167	IS1592_IS982_unknown	tet(H)	IS1592_IS982_unknown-tet(H)	366	0	1	1	1
PDDTT3S3L0508	Broiler carcass	Chicken	Slaughterhouse	Shandong 1_1	Shandong	k119_13114	PDDTT3S3L0508_l500.fa-k119_13114	IS1592_IS982_unknown	tet(H)	IS1592_IS982_unknown-tet(H)	302	0	1	1	1
PDDTT3S3L0610	Broiler carcass	Chicken	Slaughterhouse	Shandong 1_1	Shandong	k119_169918	PDDTT3S3L0610_l500.fa-k119_169918	IS1592_IS982_unknown	tet(H)	IS1592_IS982_unknown-tet(H)	302	0	1	1	1
PDDTT3S4L0515	Broiler carcass	Chicken	Slaughterhouse	Shandong 1_1	Shandong	k119_106973	PDDTT3S4L0515_l500.fa-k119_106973	IS1592_IS982_unknown	tet(H)	IS1592_IS982_unknown-tet(H)	302	0	1	1	1
PDDTT3S4L0616	Broiler carcass	Chicken	Slaughterhouse	Shandong 1_1	Shandong	k119_15421	PDDTT3S4L0616_l500.fa-k119_15421	IS1592_IS982_unknown	tet(H)	IS1592_IS982_unknown-tet(H)	302	0	1	1	1
PDDTT3S4L0717	Broiler carcass	Chicken	Slaughterhouse	Shandong 1_1	Shandong	k119_96035	PDDTT3S4L0717_l500.fa-k119_96035	IS1592_IS982_unknown	tet(H)	IS1592_IS982_unknown-tet(H)	302	0	1	1	1
PDDTT3S4L0718	Broiler carcass	Chicken	Slaughterhouse	Shandong 1_1	Shandong	k119_78105	PDDTT3S4L0718_l500.fa-k119_78105	IS1592_IS982_unknown	tet(H)	IS1592_IS982_unknown-tet(H)	302	0	1	1	1
PDDTT3S4L0819	Broiler carcass	Chicken	Slaughterhouse	Shandong 1_1	Shandong	k119_141820	PDDTT3S4L0819_l500.fa-k119_141820	IS1592_IS982_unknown	tet(H)	IS1592_IS982_unknown-tet(H)	302	0	1	1	1
PDDTT3S4L0820	Broiler carcass	Chicken	Slaughterhouse	Shandong 1_1	Shandong	k119_150578	PDDTT3S4L0820_l500.fa-k119_150578	IS1592_IS982_unknown	tet(H)	IS1592_IS982_unknown-tet(H)	302	0	1	1	1
PDDTT3S3L0304	Broiler carcass	Chicken	Slaughterhouse	Shandong 1_1	Shandong	k119_30707	PDDTT3S3L0304_l500.fa-k119_30707	IS1592_IS982_unknown	tet(H)	IS1592_IS982_unknown-tet(H)	302	0	1	1	1
PDDTT3S4L0212	Broiler carcass	Chicken	Slaughterhouse	Shandong 1_1	Shandong	k119_16384	PDDTT3S4L0212_l500.fa-k119_16384	IS1592_IS982_unknown	tet(H)	IS1592_IS982_unknown-tet(H)	304	0	1	1	1
SDPD3TWT3-01	Wastewater	Environment	Slaughterhouse	Shandong 3	Shandong	k119_575422	SDPD3TWT3-01_l500.fa-k119_575422	IS1592_IS982_unknown	tet(H)	IS1592_IS982_unknown-tet(H)	302	0	1	1	1
HAYS3JFT1-11	Broiler faeces	Chicken	Farm	Henan 3	Henan	k119_19022	HAYS3JFT1-11_l500.fa-k119_19022	IS15DI_IS6_unknown	cmlA5	IS15DI_IS6_unknown-cmlA5	1952	1	1	1	0
HAYS3JFT2-2	Broiler faeces	Chicken	Farm	Henan 3	Henan	k119_46278	HAYS3JFT2-2_l500.fa-k119_46278	IS15DI_IS6_unknown	cmlA5	IS15DI_IS6_unknown-cmlA5	1952	1	1	1	0
PDJFL1A3	Broiler faeces	Chicken	Farm	Shandong 1_2	Shandong	k119_23063	PDJFL1A3_l500.fa-k119_23063	IS15DI_IS6_unknown	cmlA5	IS15DI_IS6_unknown-cmlA5	3235	1	1	1	0
HAYS1JFT1-2	Broiler faeces	Chicken	Farm	Henan 1	Henan	k119_154543	HAYS1JFT1-2_l500.fa-k119_154543	IS15DII_IS6_unknown	QnrS2	IS15DII_IS6_unknown-QnrS2	458	1	1	1	0
HAYS1JFT1-5	Broiler faeces	Chicken	Farm	Henan 1	Henan	k119_201890	HAYS1JFT1-5_l500.fa-k119_201890	IS15DII_IS6_unknown	QnrS2	IS15DII_IS6_unknown-QnrS2	880	1	1	1	0
HAYS3JFT2-2	Broiler faeces	Chicken	Farm	Henan 3	Henan	k119_218453	HAYS3JFT2-2_l500.fa-k119_218453	IS15DIV_IS6_unknown	CTX-M-55	IS15DIV_IS6_unknown-CTX-M-55	371	1	1	1	0
LNTPJFT1_02	Broiler faeces	Chicken	Farm	Liaoning 2	Liaoning	k119_173661	LNTPJFT1_02_l500.fa-k119_173661	IS15DIV_IS6_unknown	CTX-M-55	IS15DIV_IS6_unknown-CTX-M-55	371	1	1	1	0
HAYS1JFT1-2	Broiler faeces	Chicken	Farm	Henan 1	Henan	k119_68387	HAYS1JFT1-2_l500.fa-k119_68387	IS1628_IS6_unknown	ErmX	IS1628_IS6_unknown-ErmX	96	0	1	1	1
HAYS1JFT2-7	Broiler faeces	Chicken	Farm	Henan 1	Henan	k119_184729	HAYS1JFT2-7_l500.fa-k119_184729	IS1628_IS6_unknown	ErmX	IS1628_IS6_unknown-ErmX	96	0	1	1	1
HAYS2JFT2-6	Broiler faeces	Chicken	Farm	Henan 2	Henan	k119_165040	HAYS2JFT2-6_l500.fa-k119_165040	IS1A_IS1_unknown	aadA5	IS1A_IS1_unknown-aadA5	2227	0	1	1	1
HAYS2YMT1-4	Broiler Feather	Chicken	Farm	Henan 2	Henan	k119_550245	HAYS2YMT1-4_l500.fa-k119_550245	IS1A_IS1_unknown	aadA5	IS1A_IS1_unknown-aadA5	195	0	1	1	1
LNPCJFT2_19	Broiler faeces	Chicken	Farm	Liaoning 1	Liaoning	k119_35699	LNPCJFT2_19_l500.fa-k119_35699	IS1A_IS1_unknown	aadA5	IS1A_IS1_unknown-aadA5	195	0	1	1	1
HAYS2JFT2-6	Broiler faeces	Chicken	Farm	Henan 2	Henan	k119_165040	HAYS2JFT2-6_l500.fa-k119_165040	IS1A_IS1_unknown	dfrA17	IS1A_IS1_unknown-dfrA17	3146	1	1	1	0
LNPCJFT2_19	Broiler faeces	Chicken	Farm	Liaoning 1	Liaoning	k119_35699	LNPCJFT2_19_l500.fa-k119_35699	IS1A_IS1_unknown	dfrA17	IS1A_IS1_unknown-dfrA17	1114	1	1	1	0
HAYS3YMT2-5	Broiler Feather	Chicken	Farm	Henan 3	Henan	k119_167722	HAYS3YMT2-5_l500.fa-k119_167722	IS1A_IS1_unknown	Escherichia_coli_mdfA	IS1A_IS1_unknown-Escherichia_coli_mdfA	108	0	1	1	1
LNPCJFT2_01	Broiler faeces	Chicken	Farm	Liaoning 1	Liaoning	k119_588189	LNPCJFT2_01_l500.fa-k119_588189	IS1A_IS1_unknown	Escherichia_coli_mdfA	IS1A_IS1_unknown-Escherichia_coli_mdfA	1036	0	1	1	1
LNPCJFT2_18	Broiler faeces	Chicken	Farm	Liaoning 1	Liaoning	k119_108160	LNPCJFT2_18_l500.fa-k119_108160	IS1A_IS1_unknown	linG	IS1A_IS1_unknown-linG	137	0	1	1	1
LNPCJFT2_05	Broiler faeces	Chicken	Farm	Liaoning 1	Liaoning	k119_117111	LNPCJFT2_05_l500.fa-k119_117111	IS1A_IS1_unknown	linG	IS1A_IS1_unknown-linG	137	0	1	1	1
PDJFL2C4	Broiler faeces	Chicken	Farm	Shandong 1_2	Shandong	k119_3068	PDJFL2C4_l500.fa-k119_3068	IS1A_IS1_unknown	linG	IS1A_IS1_unknown-linG	137	0	1	1	1
SDPD1JFT1.15	Broiler faeces	Chicken	Farm	Shandong 2	Shandong	k119_373535	SDPD1JFT1.15_l500.fa-k119_373535	IS1A_IS1_unknown	linG	IS1A_IS1_unknown-linG	137	0	1	1	1
HAYS3YMT1-02	Broiler Feather	Chicken	Farm	Henan 3	Henan	k119_707059	HAYS3YMT1-02_l500.fa-k119_707059	IS1A_IS1_unknown	QnrB4	IS1A_IS1_unknown-QnrB4	1024	1	1	1	0
LNPCJFT2_11	Broiler faeces	Chicken	Farm	Liaoning 1	Liaoning	k119_242634	LNPCJFT2_11_l500.fa-k119_242634	IS1A_IS1_unknown	QnrB4	IS1A_IS1_unknown-QnrB4	2087	1	1	1	0
LNPCJFT2_17	Broiler faeces	Chicken	Farm	Liaoning 1	Liaoning	k119_131374	LNPCJFT2_17_l500.fa-k119_131374	IS1A_IS1_unknown	QnrB4	IS1A_IS1_unknown-QnrB4	2087	1	1	1	0
LNPCJFT2_19	Broiler faeces	Chicken	Farm	Liaoning 1	Liaoning	k119_106626	LNPCJFT2_19_l500.fa-k119_106626	IS1A_IS1_unknown	QnrB4	IS1A_IS1_unknown-QnrB4	2087	1	1	1	0
LNPCJFT1_17	Broiler faeces	Chicken	Farm	Liaoning 1	Liaoning	k119_73234	LNPCJFT1_17_l500.fa-k119_73234	IS1A_IS1_unknown	QnrB4	IS1A_IS1_unknown-QnrB4	2087	1	1	1	0
LNPCJFT2_03	Broiler faeces	Chicken	Farm	Liaoning 1	Liaoning	k119_40096	LNPCJFT2_03_l500.fa-k119_40096	IS1A_IS1_unknown	QnrB4	IS1A_IS1_unknown-QnrB4	2087	1	1	1	0
LNPCJFT2_05	Broiler faeces	Chicken	Farm	Liaoning 1	Liaoning	k119_121766	LNPCJFT2_05_l500.fa-k119_121766	IS1A_IS1_unknown	QnrB4	IS1A_IS1_unknown-QnrB4	2087	1	1	1	0
PDJFT1S4L0515	Broiler faeces	Chicken	Farm	Shandong 1_1	Shandong	k119_33737	PDJFT1S4L0515_l500.fa-k119_33737	IS1A_IS1_unknown	QnrB4	IS1A_IS1_unknown-QnrB4	2087	1	1	1	0
HAYS1JFT1-6	Broiler faeces	Chicken	Farm	Henan 1	Henan	k119_184746	HAYS1JFT1-6_l500.fa-k119_184746	IS256_IS256_unknown	ANT(9)-Ia	IS256_IS256_unknown-ANT(9)-Ia	147	0	1	1	1
HAYS1JFT1-7	Broiler faeces	Chicken	Farm	Henan 1	Henan	k119_67830	HAYS1JFT1-7_l500.fa-k119_67830	IS256_IS256_unknown	ANT(9)-Ia	IS256_IS256_unknown-ANT(9)-Ia	2065	0	1	1	1
HAYS1JFT2-7	Broiler faeces	Chicken	Farm	Henan 1	Henan	k119_240660	HAYS1JFT2-7_l500.fa-k119_240660	IS256_IS256_unknown	ANT(9)-Ia	IS256_IS256_unknown-ANT(9)-Ia	2066	0	1	1	1
HAYS3JFT2-11	Broiler faeces	Chicken	Farm	Henan 3	Henan	k119_253222	HAYS3JFT2-11_l500.fa-k119_253222	IS256_IS256_unknown	ANT(9)-Ia	IS256_IS256_unknown-ANT(9)-Ia	2066	0	1	1	1
SDPD3JFT1-13	Broiler faeces	Chicken	Farm	Shandong 3	Shandong	k119_217295	SDPD3JFT1-13_l500.fa-k119_217295	IS256_IS256_unknown	ANT(9)-Ia	IS256_IS256_unknown-ANT(9)-Ia	132	0	1	1	1
SDPD4JFT1-01	Broiler faeces	Chicken	Farm	Shandong 4	Shandong	k119_76934	SDPD4JFT1-01_l500.fa-k119_76934	IS256_IS256_unknown	ANT(9)-Ia	IS256_IS256_unknown-ANT(9)-Ia	1786	0	1	1	1
SDPD4JFT1-05	Broiler faeces	Chicken	Farm	Shandong 4	Shandong	k119_232789	SDPD4JFT1-05_l500.fa-k119_232789	IS256_IS256_unknown	ANT(9)-Ia	IS256_IS256_unknown-ANT(9)-Ia	1786	0	1	1	1
SDPD4JFT1-13	Broiler faeces	Chicken	Farm	Shandong 4	Shandong	k119_244626	SDPD4JFT1-13_l500.fa-k119_244626	IS256_IS256_unknown	ANT(9)-Ia	IS256_IS256_unknown-ANT(9)-Ia	1786	0	1	1	1
SDPD4JFT1-18	Broiler faeces	Chicken	Farm	Shandong 4	Shandong	k119_688414	SDPD4JFT1-18_l500.fa-k119_688414	IS256_IS256_unknown	ANT(9)-Ia	IS256_IS256_unknown-ANT(9)-Ia	1786	0	1	1	1
SDPD4JFT1-17	Broiler faeces	Chicken	Farm	Shandong 4	Shandong	k119_670063	SDPD4JFT1-17_l500.fa-k119_670063	IS256_IS256_unknown	ANT(9)-Ia	IS256_IS256_unknown-ANT(9)-Ia	1786	0	1	1	1
SDPD4JFT1-15	Broiler faeces	Chicken	Farm	Shandong 4	Shandong	k119_570879	SDPD4JFT1-15_l500.fa-k119_570879	IS256_IS256_unknown	ANT(9)-Ia	IS256_IS256_unknown-ANT(9)-Ia	3623	0	1	1	1
HAYS1JFT1-7	Broiler faeces	Chicken	Farm	Henan 1	Henan	k119_81928	HAYS1JFT1-7_l500.fa-k119_81928	IS256_IS256_unknown	FosD	IS256_IS256_unknown-FosD	579	0	1	1	1
HAYS1JFT2-7	Broiler faeces	Chicken	Farm	Henan 1	Henan	k119_548830	HAYS1JFT2-7_l500.fa-k119_548830	IS256_IS256_unknown	FosD	IS256_IS256_unknown-FosD	579	0	1	1	1
HAYS1JFT1-2	Broiler faeces	Chicken	Farm	Henan 1	Henan	k119_53036	HAYS1JFT1-2_l500.fa-k119_53036	IS256_IS256_unknown	FosD	IS256_IS256_unknown-FosD	3190	0	1	1	1
HAYS1JFT1-6	Broiler faeces	Chicken	Farm	Henan 1	Henan	k119_74170	HAYS1JFT1-6_l500.fa-k119_74170	IS256_IS256_unknown	FosD	IS256_IS256_unknown-FosD	3190	0	1	1	1
HAYS3JFT2-11	Broiler faeces	Chicken	Farm	Henan 3	Henan	k119_36010	HAYS3JFT2-11_l500.fa-k119_36010	IS256_IS256_unknown	FosD	IS256_IS256_unknown-FosD	579	0	1	1	1
SDPD3HCT2-01	Barn Floor	Environment	Farm	Shandong 3	Shandong	k119_1045762	SDPD3HCT2-01_l500.fa-k119_1045762	IS256_IS256_unknown	PC1_beta-lactamase_(blaZ)	IS256_IS256_unknown-PC1_beta-lactamase_(blaZ)	1516	1	1	1	0
SDPD4HCT1-02	Barn Floor	Environment	Farm	Shandong 4	Shandong	k119_759642	SDPD4HCT1-02_l500.fa-k119_759642	IS256_IS256_unknown	PC1_beta-lactamase_(blaZ)	IS256_IS256_unknown-PC1_beta-lactamase_(blaZ)	3629	1	1	1	0
HAYS2YMT1-4	Broiler Feather	Chicken	Farm	Henan 2	Henan	k119_87273	HAYS2YMT1-4_l500.fa-k119_87273	IS257-1_IS6_unknown	ErmC	IS257-1_IS6_unknown-ErmC	175	1	1	1	0
LNTPDMT1_02	Barn Floor	Environment	Farm	Liaoning 2	Liaoning	k119_163080	LNTPDMT1_02_l500.fa-k119_163080	IS257-1_IS6_unknown	ErmC	IS257-1_IS6_unknown-ErmC	39	1	1	1	0
SDPD1JFT1.12	Broiler faeces	Chicken	Farm	Shandong 2	Shandong	k119_178640	SDPD1JFT1.12_l500.fa-k119_178640	IS257-1_IS6_unknown	ErmC	IS257-1_IS6_unknown-ErmC	67	1	1	1	0
SDPD3HCT2-02	Barn Floor	Environment	Farm	Shandong 3	Shandong	k119_876673	SDPD3HCT2-02_l500.fa-k119_876673	IS257-1_IS6_unknown	ErmC	IS257-1_IS6_unknown-ErmC	39	1	1	1	0
LNPCDMT1_05	Barn Floor	Environment	Farm	Liaoning 1	Liaoning	k119_1078911	LNPCDMT1_05_l500.fa-k119_1078911	IS257-1_IS6_unknown	mecA	IS257-1_IS6_unknown-mecA	2400	1	1	1	0
LNPCDMT2_03	Barn Floor	Environment	Farm	Liaoning 1	Liaoning	k119_287466	LNPCDMT2_03_l500.fa-k119_287466	IS257-1_IS6_unknown	mecA	IS257-1_IS6_unknown-mecA	2400	1	1	1	0
LNPCDMT2_01	Barn Floor	Environment	Farm	Liaoning 1	Liaoning	k119_560682	LNPCDMT2_01_l500.fa-k119_560682	IS257-1_IS6_unknown	mecA	IS257-1_IS6_unknown-mecA	2480	1	1	1	0
LNTPDMT1_03	Barn Floor	Environment	Farm	Liaoning 2	Liaoning	k119_1051169	LNTPDMT1_03_l500.fa-k119_1051169	IS257-1_IS6_unknown	mecA	IS257-1_IS6_unknown-mecA	2600	1	1	1	0
LNTPDMT1_02	Barn Floor	Environment	Farm	Liaoning 2	Liaoning	k119_776309	LNTPDMT1_02_l500.fa-k119_776309	IS257-1_IS6_unknown	mecA	IS257-1_IS6_unknown-mecA	2600	1	1	1	0
SDPD4JFT1-17	Broiler faeces	Chicken	Farm	Shandong 4	Shandong	k119_701725	SDPD4JFT1-17_l500.fa-k119_701725	IS257-1_IS6_unknown	mecA	IS257-1_IS6_unknown-mecA	2600	1	1	1	0
LNPCDMT1_05	Barn Floor	Environment	Farm	Liaoning 1	Liaoning	k119_1078911	LNPCDMT1_05_l500.fa-k119_1078911	IS257-1_IS6_unknown	mecR1	IS257-1_IS6_unknown-mecR1	4506	1	1	1	0
LNPCDMT2_03	Barn Floor	Environment	Farm	Liaoning 1	Liaoning	k119_287466	LNPCDMT2_03_l500.fa-k119_287466	IS257-1_IS6_unknown	mecR1	IS257-1_IS6_unknown-mecR1	4506	1	1	1	0
LNPCDMT2_01	Barn Floor	Environment	Farm	Liaoning 1	Liaoning	k119_560682	LNPCDMT2_01_l500.fa-k119_560682	IS257-1_IS6_unknown	mecR1	IS257-1_IS6_unknown-mecR1	4586	1	1	1	0
LNTPDMT1_03	Barn Floor	Environment	Farm	Liaoning 2	Liaoning	k119_1051169	LNTPDMT1_03_l500.fa-k119_1051169	IS257-1_IS6_unknown	mecR1	IS257-1_IS6_unknown-mecR1	4706	1	1	1	0
LNTPDMT1_02	Barn Floor	Environment	Farm	Liaoning 2	Liaoning	k119_776309	LNTPDMT1_02_l500.fa-k119_776309	IS257-1_IS6_unknown	mecR1	IS257-1_IS6_unknown-mecR1	4706	1	1	1	0
SDPD4JFT1-17	Broiler faeces	Chicken	Farm	Shandong 4	Shandong	k119_701725	SDPD4JFT1-17_l500.fa-k119_701725	IS257-1_IS6_unknown	mecR1	IS257-1_IS6_unknown-mecR1	4706	1	1	1	0
LNTPDMT1_02	Barn Floor	Environment	Farm	Liaoning 2	Liaoning	k119_699048	LNTPDMT1_02_l500.fa-k119_699048	IS257-1_IS6_unknown	PC1_beta-lactamase_(blaZ)	IS257-1_IS6_unknown-PC1_beta-lactamase_(blaZ)	11	1	1	1	0
LNTPDMT1_03	Barn Floor	Environment	Farm	Liaoning 2	Liaoning	k119_760163	LNTPDMT1_03_l500.fa-k119_760163	IS257-1_IS6_unknown	PC1_beta-lactamase_(blaZ)	IS257-1_IS6_unknown-PC1_beta-lactamase_(blaZ)	11	1	1	1	0
LNTPJFT1_12	Broiler faeces	Chicken	Farm	Liaoning 2	Liaoning	k119_70872	LNTPJFT1_12_l500.fa-k119_70872	IS3503_IS256_IS1249	ErmX	IS3503_IS256_IS1249-ErmX	670	0	1	1	1
LNTPJFT2_13	Broiler faeces	Chicken	Farm	Liaoning 2	Liaoning	k119_233769	LNTPJFT2_13_l500.fa-k119_233769	IS3503_IS256_IS1249	ErmX	IS3503_IS256_IS1249-ErmX	670	0	1	1	1
HAYS3YMT1-03	Broiler Feather	Chicken	Farm	Henan 3	Henan	k119_882725	HAYS3YMT1-03_l500.fa-k119_882725	IS3507_IS256_IS1249	ErmX	IS3507_IS256_IS1249-ErmX	208	0	1	1	1
LNTPJFT2_11	Broiler faeces	Chicken	Farm	Liaoning 2	Liaoning	k119_223913	LNTPJFT2_11_l500.fa-k119_223913	IS3507_IS256_IS1249	ErmX	IS3507_IS256_IS1249-ErmX	208	0	1	1	1
PDJFT1S4L0819	Broiler faeces	Chicken	Farm	Shandong 1_1	Shandong	k119_106898	PDJFT1S4L0819_l500.fa-k119_106898	IS4321_IS110_IS1111	aadA5	IS4321_IS110_IS1111-aadA5	1713	0	1	1	1
PDJFT2S3L0202	Broiler faeces	Chicken	Farm	Shandong 1_1	Shandong	k119_7501	PDJFT2S3L0202_l500.fa-k119_7501	IS4321_IS110_IS1111	aadA5	IS4321_IS110_IS1111-aadA5	1713	0	1	1	1
PDJFL1A4	Broiler faeces	Chicken	Farm	Shandong 1_2	Shandong	k119_223523	PDJFL1A4_l500.fa-k119_223523	IS4321_IS110_IS1111	aadA5	IS4321_IS110_IS1111-aadA5	1713	0	1	1	1
PDJFL1A5	Broiler faeces	Chicken	Farm	Shandong 1_2	Shandong	k119_141588	PDJFL1A5_l500.fa-k119_141588	IS4321_IS110_IS1111	aadA5	IS4321_IS110_IS1111-aadA5	1713	0	1	1	1
PDJFT2S3L0202	Broiler faeces	Chicken	Farm	Shandong 1_1	Shandong	k119_7501	PDJFT2S3L0202_l500.fa-k119_7501	IS4321_IS110_IS1111	dfrA17	IS4321_IS110_IS1111-dfrA17	2632	1	1	1	0
PDJFT1S4L0819	Broiler faeces	Chicken	Farm	Shandong 1_1	Shandong	k119_106898	PDJFT1S4L0819_l500.fa-k119_106898	IS4321_IS110_IS1111	dfrA17	IS4321_IS110_IS1111-dfrA17	2632	1	1	1	0
PDJFL1A4	Broiler faeces	Chicken	Farm	Shandong 1_2	Shandong	k119_223523	PDJFL1A4_l500.fa-k119_223523	IS4321_IS110_IS1111	dfrA17	IS4321_IS110_IS1111-dfrA17	2632	1	1	1	0
PDJFL1A5	Broiler faeces	Chicken	Farm	Shandong 1_2	Shandong	k119_141588	PDJFL1A5_l500.fa-k119_141588	IS4321_IS110_IS1111	dfrA17	IS4321_IS110_IS1111-dfrA17	2632	1	1	1	0
HAYS1JFT1-2	Broiler faeces	Chicken	Farm	Henan 1	Henan	k119_201475	HAYS1JFT1-2_l500.fa-k119_201475	IS5_IS5_IS5	NDM-5	IS5_IS5_IS5-NDM-5	167	1	1	1	0
HAYS1JFT1-5	Broiler faeces	Chicken	Farm	Henan 1	Henan	k119_214434	HAYS1JFT1-5_l500.fa-k119_214434	IS5_IS5_IS5	NDM-5	IS5_IS5_IS5-NDM-5	167	1	1	1	0
HAYS3JFT1-14	Broiler faeces	Chicken	Farm	Henan 3	Henan	k119_137488	HAYS3JFT1-14_l500.fa-k119_137488	IS5_IS5_IS5	NDM-5	IS5_IS5_IS5-NDM-5	167	1	1	1	0
HAYS3YMT2-3	Broiler Feather	Chicken	Farm	Henan 3	Henan	k119_996794	HAYS3YMT2-3_l500.fa-k119_996794	IS5_IS5_IS5	NDM-5	IS5_IS5_IS5-NDM-5	167	1	1	1	0
LNPCJFT2_11	Broiler faeces	Chicken	Farm	Liaoning 1	Liaoning	k119_153373	LNPCJFT2_11_l500.fa-k119_153373	IS5_IS5_IS5	NDM-5	IS5_IS5_IS5-NDM-5	167	1	1	1	0
SDPD1JFT1.07	Broiler faeces	Chicken	Farm	Shandong 2	Shandong	k119_68357	SDPD1JFT1.07_l500.fa-k119_68357	IS5_IS5_IS5	NDM-5	IS5_IS5_IS5-NDM-5	167	1	1	1	0
SDPD1JFT1.08	Broiler faeces	Chicken	Farm	Shandong 2	Shandong	k119_59734	SDPD1JFT1.08_l500.fa-k119_59734	IS5_IS5_IS5	NDM-5	IS5_IS5_IS5-NDM-5	167	1	1	1	0
SDPD1JFT1.12	Broiler faeces	Chicken	Farm	Shandong 2	Shandong	k119_214322	SDPD1JFT1.12_l500.fa-k119_214322	IS5_IS5_IS5	NDM-5	IS5_IS5_IS5-NDM-5	167	1	1	1	0
SDPD1JFT2.01	Broiler faeces	Chicken	Farm	Shandong 2	Shandong	k119_78060	SDPD1JFT2.01_l500.fa-k119_78060	IS5_IS5_IS5	NDM-5	IS5_IS5_IS5-NDM-5	167	1	1	1	0
SDPD1JFT1.06	Broiler faeces	Chicken	Farm	Shandong 2	Shandong	k119_95797	SDPD1JFT1.06_l500.fa-k119_95797	IS5_IS5_IS5	NDM-5	IS5_IS5_IS5-NDM-5	167	1	1	1	0
SDPD1JFT1.11	Broiler faeces	Chicken	Farm	Shandong 2	Shandong	k119_237542	SDPD1JFT1.11_l500.fa-k119_237542	IS5_IS5_IS5	NDM-5	IS5_IS5_IS5-NDM-5	167	1	1	1	0
LNPCTRT2_03	Soil	Environment	Farm	Liaoning 1	Liaoning	k119_1147757	LNPCTRT2_03_l500.fa-k119_1147757	IS6100_IS6_unknown	AAC(6')-Ib9	IS6100_IS6_unknown-AAC(6')-Ib9	846	1	1	1	0
LNLDTRT1-01	Soil	Environment	Farm	Liaoning 3	Liaoning	k119_1157377	LNLDTRT1-01_l500.fa-k119_1157377	IS6100_IS6_unknown	AAC(6')-Ib9	IS6100_IS6_unknown-AAC(6')-Ib9	3279	1	1	1	0
HAYS1TWT3-1	Wastewater	Environment	Slaughterhouse	Henan 1	Henan	k119_2665199	HAYS1TWT3-1_l500.fa-k119_2665199	IS6100_IS6_unknown	aadA5	IS6100_IS6_unknown-aadA5	2460	0	1	1	1
HAYS3HCT2-1	Barn Floor	Environment	Farm	Henan 3	Henan	k119_826254	HAYS3HCT2-1_l500.fa-k119_826254	IS6100_IS6_unknown	aadA5	IS6100_IS6_unknown-aadA5	884	0	1	1	1
LNPCDMT2_03	Barn Floor	Environment	Farm	Liaoning 1	Liaoning	k119_144373	LNPCDMT2_03_l500.fa-k119_144373	IS6100_IS6_unknown	aadA5	IS6100_IS6_unknown-aadA5	884	0	1	1	1
LNPCDMT2_01	Barn Floor	Environment	Farm	Liaoning 1	Liaoning	k119_1019600	LNPCDMT2_01_l500.fa-k119_1019600	IS6100_IS6_unknown	aadA5	IS6100_IS6_unknown-aadA5	2122	0	1	1	1
LNTPDMT1_03	Barn Floor	Environment	Farm	Liaoning 2	Liaoning	k119_123005	LNTPDMT1_03_l500.fa-k119_123005	IS6100_IS6_unknown	aadA5	IS6100_IS6_unknown-aadA5	2379	0	1	1	1
PDJFT2S4L0718	Broiler faeces	Chicken	Farm	Shandong 1_1	Shandong	k119_291876	PDJFT2S4L0718_l500.fa-k119_291876	IS6100_IS6_unknown	aadA5	IS6100_IS6_unknown-aadA5	3560	0	1	1	1
PDJFT1S3L0405	Broiler faeces	Chicken	Farm	Shandong 1_1	Shandong	k119_281561	PDJFT1S3L0405_l500.fa-k119_281561	IS6100_IS6_unknown	aadA5	IS6100_IS6_unknown-aadA5	3560	0	1	1	1
PDJFT1S3L0202	Broiler faeces	Chicken	Farm	Shandong 1_1	Shandong	k119_343388	PDJFT1S3L0202_l500.fa-k119_343388	IS6100_IS6_unknown	aadA5	IS6100_IS6_unknown-aadA5	3560	0	1	1	1
PDJFT1S3L0406	Broiler faeces	Chicken	Farm	Shandong 1_1	Shandong	k119_189518	PDJFT1S3L0406_l500.fa-k119_189518	IS6100_IS6_unknown	aadA5	IS6100_IS6_unknown-aadA5	3560	0	1	1	1
PDJFT1S3L0304	Broiler faeces	Chicken	Farm	Shandong 1_1	Shandong	k119_240983	PDJFT1S3L0304_l500.fa-k119_240983	IS6100_IS6_unknown	aadA5	IS6100_IS6_unknown-aadA5	3560	0	1	1	1
PDJFT2S4L0717	Broiler faeces	Chicken	Farm	Shandong 1_1	Shandong	k119_886681	PDJFT2S4L0717_l500.fa-k119_886681	IS6100_IS6_unknown	aadA5	IS6100_IS6_unknown-aadA5	3560	0	1	1	1
SDPD1TRT2.02	Soil	Environment	Farm	Shandong 2	Shandong	k119_1459766	SDPD1TRT2.02_l500.fa-k119_1459766	IS6100_IS6_unknown	aadA5	IS6100_IS6_unknown-aadA5	268	0	1	1	1
LNPCTRT2_03	Soil	Environment	Farm	Liaoning 1	Liaoning	k119_1147757	LNPCTRT2_03_l500.fa-k119_1147757	IS6100_IS6_unknown	dfrA16	IS6100_IS6_unknown-dfrA16	278	0	1	1	1
LNLDJFT1-07	Broiler faeces	Chicken	Farm	Liaoning 3	Liaoning	k119_430270	LNLDJFT1-07_l500.fa-k119_430270	IS6100_IS6_unknown	dfrA16	IS6100_IS6_unknown-dfrA16	278	0	1	1	1
SDPD4HCT1-01	Barn Floor	Environment	Farm	Shandong 4	Shandong	k119_1163348	SDPD4HCT1-01_l500.fa-k119_1163348	IS6100_IS6_unknown	dfrA16	IS6100_IS6_unknown-dfrA16	278	0	1	1	1
SDPD4TRT1-03	Soil	Environment	Farm	Shandong 4	Shandong	k119_1143007	SDPD4TRT1-03_l500.fa-k119_1143007	IS6100_IS6_unknown	dfrA16	IS6100_IS6_unknown-dfrA16	278	0	1	1	1
HAYS3HCT2-1	Barn Floor	Environment	Farm	Henan 3	Henan	k119_826254	HAYS3HCT2-1_l500.fa-k119_826254	IS6100_IS6_unknown	dfrA17	IS6100_IS6_unknown-dfrA17	280	1	1	1	0
LNPCDMT2_03	Barn Floor	Environment	Farm	Liaoning 1	Liaoning	k119_144373	LNPCDMT2_03_l500.fa-k119_144373	IS6100_IS6_unknown	dfrA17	IS6100_IS6_unknown-dfrA17	280	1	1	1	0
LNPCDMT2_01	Barn Floor	Environment	Farm	Liaoning 1	Liaoning	k119_1019600	LNPCDMT2_01_l500.fa-k119_1019600	IS6100_IS6_unknown	dfrA17	IS6100_IS6_unknown-dfrA17	3041	1	1	1	0
LNTPDMT1_03	Barn Floor	Environment	Farm	Liaoning 2	Liaoning	k119_123005	LNTPDMT1_03_l500.fa-k119_123005	IS6100_IS6_unknown	dfrA17	IS6100_IS6_unknown-dfrA17	1775	1	1	1	0
PDJFT2S4L0718	Broiler faeces	Chicken	Farm	Shandong 1_1	Shandong	k119_291876	PDJFT2S4L0718_l500.fa-k119_291876	IS6100_IS6_unknown	dfrA17	IS6100_IS6_unknown-dfrA17	4479	1	1	1	0
PDJFT1S3L0405	Broiler faeces	Chicken	Farm	Shandong 1_1	Shandong	k119_281561	PDJFT1S3L0405_l500.fa-k119_281561	IS6100_IS6_unknown	dfrA17	IS6100_IS6_unknown-dfrA17	4479	1	1	1	0
PDJFT1S3L0202	Broiler faeces	Chicken	Farm	Shandong 1_1	Shandong	k119_343388	PDJFT1S3L0202_l500.fa-k119_343388	IS6100_IS6_unknown	dfrA17	IS6100_IS6_unknown-dfrA17	4479	1	1	1	0
PDJFT1S3L0406	Broiler faeces	Chicken	Farm	Shandong 1_1	Shandong	k119_189518	PDJFT1S3L0406_l500.fa-k119_189518	IS6100_IS6_unknown	dfrA17	IS6100_IS6_unknown-dfrA17	4479	1	1	1	0
PDJFT1S3L0304	Broiler faeces	Chicken	Farm	Shandong 1_1	Shandong	k119_240983	PDJFT1S3L0304_l500.fa-k119_240983	IS6100_IS6_unknown	dfrA17	IS6100_IS6_unknown-dfrA17	4479	1	1	1	0
PDJFT2S4L0717	Broiler faeces	Chicken	Farm	Shandong 1_1	Shandong	k119_886681	PDJFT2S4L0717_l500.fa-k119_886681	IS6100_IS6_unknown	dfrA17	IS6100_IS6_unknown-dfrA17	4479	1	1	1	0
LNPCJFT1_15	Broiler faeces	Chicken	Farm	Liaoning 1	Liaoning	k119_57022	LNPCJFT1_15_l500.fa-k119_57022	IS6100_IS6_unknown	tet(33)	IS6100_IS6_unknown-tet(33)	3579	0	1	1	1
SDPD4JFT2-13	Broiler faeces	Chicken	Farm	Shandong 4	Shandong	k119_187519	SDPD4JFT2-13_l500.fa-k119_187519	IS6100_IS6_unknown	tet(33)	IS6100_IS6_unknown-tet(33)	4992	0	1	1	1
HAYS3HCT2-2	Barn Floor	Environment	Farm	Henan 3	Henan	k119_474946	HAYS3HCT2-2_l500.fa-k119_474946	IS615_IS1380_IS942	CfxA2	IS615_IS1380_IS942-CfxA2	17	0	1	1	1
HAYS3JFT2-11	Broiler faeces	Chicken	Farm	Henan 3	Henan	k119_350281	HAYS3JFT2-11_l500.fa-k119_350281	IS615_IS1380_IS942	CfxA2	IS615_IS1380_IS942-CfxA2	17	0	1	1	1
HAYS3JFT2-2	Broiler faeces	Chicken	Farm	Henan 3	Henan	k119_129128	HAYS3JFT2-2_l500.fa-k119_129128	IS615_IS1380_IS942	CfxA2	IS615_IS1380_IS942-CfxA2	17	0	1	1	1
HAYS3JFT2-3	Broiler faeces	Chicken	Farm	Henan 3	Henan	k119_134698	HAYS3JFT2-3_l500.fa-k119_134698	IS615_IS1380_IS942	CfxA2	IS615_IS1380_IS942-CfxA2	17	0	1	1	1
HAYS3JFT2-15	Broiler faeces	Chicken	Farm	Henan 3	Henan	k119_224295	HAYS3JFT2-15_l500.fa-k119_224295	IS615_IS1380_IS942	CfxA3	IS615_IS1380_IS942-CfxA3	17	0	1	1	1
HAYS3JFT2-9	Broiler faeces	Chicken	Farm	Henan 3	Henan	k119_107556	HAYS3JFT2-9_l500.fa-k119_107556	IS615_IS1380_IS942	CfxA3	IS615_IS1380_IS942-CfxA3	17	0	1	1	1
HAYS3YMT2-3	Broiler Feather	Chicken	Farm	Henan 3	Henan	k119_1087802	HAYS3YMT2-3_l500.fa-k119_1087802	IS615_IS1380_IS942	CfxA3	IS615_IS1380_IS942-CfxA3	17	0	1	1	1
HAYS3YMT2-5	Broiler Feather	Chicken	Farm	Henan 3	Henan	k119_368851	HAYS3YMT2-5_l500.fa-k119_368851	IS615_IS1380_IS942	CfxA3	IS615_IS1380_IS942-CfxA3	17	0	1	1	1
SDPD1JFT2.01	Broiler faeces	Chicken	Farm	Shandong 2	Shandong	k119_277873	SDPD1JFT2.01_l500.fa-k119_277873	IS615_IS1380_IS942	CfxA3	IS615_IS1380_IS942-CfxA3	17	0	1	1	1
SDPD3JFT2-02	Broiler faeces	Chicken	Farm	Shandong 3	Shandong	k119_110894	SDPD3JFT2-02_l500.fa-k119_110894	IS615_IS1380_IS942	CfxA3	IS615_IS1380_IS942-CfxA3	17	0	1	1	1
HAYS3HCT2-2	Barn Floor	Environment	Farm	Henan 3	Henan	k119_474946	HAYS3HCT2-2_l500.fa-k119_474946	IS942_IS1380_IS942	CfxA2	IS942_IS1380_IS942-CfxA2	1466	0	1	1	1
HAYS3JFT2-2	Broiler faeces	Chicken	Farm	Henan 3	Henan	k119_129128	HAYS3JFT2-2_l500.fa-k119_129128	IS942_IS1380_IS942	CfxA2	IS942_IS1380_IS942-CfxA2	1466	0	1	1	1
HAYS3JFT2-3	Broiler faeces	Chicken	Farm	Henan 3	Henan	k119_134698	HAYS3JFT2-3_l500.fa-k119_134698	IS942_IS1380_IS942	CfxA2	IS942_IS1380_IS942-CfxA2	1466	0	1	1	1
HAYS3JFT2-15	Broiler faeces	Chicken	Farm	Henan 3	Henan	k119_224295	HAYS3JFT2-15_l500.fa-k119_224295	IS942_IS1380_IS942	CfxA3	IS942_IS1380_IS942-CfxA3	1466	0	1	1	1
HAYS3JFT2-9	Broiler faeces	Chicken	Farm	Henan 3	Henan	k119_107556	HAYS3JFT2-9_l500.fa-k119_107556	IS942_IS1380_IS942	CfxA3	IS942_IS1380_IS942-CfxA3	1466	0	1	1	1
HAYS3YMT2-3	Broiler Feather	Chicken	Farm	Henan 3	Henan	k119_1087802	HAYS3YMT2-3_l500.fa-k119_1087802	IS942_IS1380_IS942	CfxA3	IS942_IS1380_IS942-CfxA3	1466	0	1	1	1
HAYS3YMT2-5	Broiler Feather	Chicken	Farm	Henan 3	Henan	k119_368851	HAYS3YMT2-5_l500.fa-k119_368851	IS942_IS1380_IS942	CfxA3	IS942_IS1380_IS942-CfxA3	1466	0	1	1	1
SDPD1JFT2.01	Broiler faeces	Chicken	Farm	Shandong 2	Shandong	k119_277873	SDPD1JFT2.01_l500.fa-k119_277873	IS942_IS1380_IS942	CfxA3	IS942_IS1380_IS942-CfxA3	1466	0	1	1	1
LNPCJFT2_05	Broiler faeces	Chicken	Farm	Liaoning 1	Liaoning	k119_93813	LNPCJFT2_05_l500.fa-k119_93813	ISAba125_IS30_unknown	NDM-1	ISAba125_IS30_unknown-NDM-1	94	0	1	1	1
LNPCJFT2_17	Broiler faeces	Chicken	Farm	Liaoning 1	Liaoning	k119_10123	LNPCJFT2_17_l500.fa-k119_10123	ISAba125_IS30_unknown	NDM-1	ISAba125_IS30_unknown-NDM-1	94	0	1	1	1
LNPCJFT2_01	Broiler faeces	Chicken	Farm	Liaoning 1	Liaoning	k119_13495	LNPCJFT2_01_l500.fa-k119_13495	ISAba125_IS30_unknown	NDM-1	ISAba125_IS30_unknown-NDM-1	94	0	1	1	1
LNPCJFT2_19	Broiler faeces	Chicken	Farm	Liaoning 1	Liaoning	k119_199781	LNPCJFT2_19_l500.fa-k119_199781	ISAba125_IS30_unknown	NDM-1	ISAba125_IS30_unknown-NDM-1	94	0	1	1	1
LNPCJFT1_10	Broiler faeces	Chicken	Farm	Liaoning 1	Liaoning	k119_134045	LNPCJFT1_10_l500.fa-k119_134045	ISAba125_IS30_unknown	NDM-1	ISAba125_IS30_unknown-NDM-1	94	0	1	1	1
LNPCJFT1_17	Broiler faeces	Chicken	Farm	Liaoning 1	Liaoning	k119_2717	LNPCJFT1_17_l500.fa-k119_2717	ISAba125_IS30_unknown	NDM-1	ISAba125_IS30_unknown-NDM-1	94	0	1	1	1
LNPCJFT1_03	Broiler faeces	Chicken	Farm	Liaoning 1	Liaoning	k119_1057675	LNPCJFT1_03_l500.fa-k119_1057675	ISAba125_IS30_unknown	NDM-1	ISAba125_IS30_unknown-NDM-1	2232	0	1	1	1
LNLDJFT1-03	Broiler faeces	Chicken	Farm	Liaoning 3	Liaoning	k119_515631	LNLDJFT1-03_l500.fa-k119_515631	ISAba125_IS30_unknown	NDM-1	ISAba125_IS30_unknown-NDM-1	94	0	1	1	1
LNLDJFT2-19	Broiler faeces	Chicken	Farm	Liaoning 3	Liaoning	k119_3056	LNLDJFT2-19_l500.fa-k119_3056	ISAba125_IS30_unknown	NDM-1	ISAba125_IS30_unknown-NDM-1	94	0	1	1	1
LNLDJFT1-07	Broiler faeces	Chicken	Farm	Liaoning 3	Liaoning	k119_436494	LNLDJFT1-07_l500.fa-k119_436494	ISAba125_IS30_unknown	NDM-1	ISAba125_IS30_unknown-NDM-1	94	0	1	1	1
SDPD1YMT1.04	Broiler Feather	Chicken	Farm	Shandong 2	Shandong	k119_215158	SDPD1YMT1.04_l500.fa-k119_215158	ISAba125_IS30_unknown	NDM-1	ISAba125_IS30_unknown-NDM-1	94	0	1	1	1
SDPD4JFT2-03	Broiler faeces	Chicken	Farm	Shandong 4	Shandong	k119_253445	SDPD4JFT2-03_l500.fa-k119_253445	ISAba125_IS30_unknown	NDM-1	ISAba125_IS30_unknown-NDM-1	94	0	1	1	1
SDPD4JFT2-13	Broiler faeces	Chicken	Farm	Shandong 4	Shandong	k119_599112	SDPD4JFT2-13_l500.fa-k119_599112	ISAba125_IS30_unknown	NDM-1	ISAba125_IS30_unknown-NDM-1	94	0	1	1	1
SDPD4JFT1-08	Broiler faeces	Chicken	Farm	Shandong 4	Shandong	k119_199706	SDPD4JFT1-08_l500.fa-k119_199706	ISAba125_IS30_unknown	NDM-1	ISAba125_IS30_unknown-NDM-1	94	0	1	1	1
SDPD4JFT1-15	Broiler faeces	Chicken	Farm	Shandong 4	Shandong	k119_542505	SDPD4JFT1-15_l500.fa-k119_542505	ISAba125_IS30_unknown	NDM-1	ISAba125_IS30_unknown-NDM-1	94	0	1	1	1
SDPD4JFT2-05	Broiler faeces	Chicken	Farm	Shandong 4	Shandong	k119_799473	SDPD4JFT2-05_l500.fa-k119_799473	ISAba125_IS30_unknown	NDM-1	ISAba125_IS30_unknown-NDM-1	94	0	1	1	1
SDPD4JFT2-11	Broiler faeces	Chicken	Farm	Shandong 4	Shandong	k119_170548	SDPD4JFT2-11_l500.fa-k119_170548	ISAba125_IS30_unknown	NDM-1	ISAba125_IS30_unknown-NDM-1	94	0	1	1	1
SDPD4JFT2-01	Broiler faeces	Chicken	Farm	Shandong 4	Shandong	k119_265582	SDPD4JFT2-01_l500.fa-k119_265582	ISAba125_IS30_unknown	NDM-1	ISAba125_IS30_unknown-NDM-1	94	0	1	1	1
SDPD4YMT1-03	Broiler Feather	Chicken	Farm	Shandong 4	Shandong	k119_842253	SDPD4YMT1-03_l500.fa-k119_842253	ISAba125_IS30_unknown	NDM-1	ISAba125_IS30_unknown-NDM-1	93	0	1	1	1
HAYS1JFT2-1	Broiler faeces	Chicken	Farm	Henan 1	Henan	k119_34454	HAYS1JFT2-1_l500.fa-k119_34454	ISAba125_IS30_unknown	NDM-5	ISAba125_IS30_unknown-NDM-5	94	1	1	1	0
HAYS1JFT2-3	Broiler faeces	Chicken	Farm	Henan 1	Henan	k119_365150	HAYS1JFT2-3_l500.fa-k119_365150	ISAba125_IS30_unknown	NDM-5	ISAba125_IS30_unknown-NDM-5	94	1	1	1	0
HAYS1JFT2-2	Broiler faeces	Chicken	Farm	Henan 1	Henan	k119_59995	HAYS1JFT2-2_l500.fa-k119_59995	ISAba125_IS30_unknown	NDM-5	ISAba125_IS30_unknown-NDM-5	94	1	1	1	0
HAYS1JFT1-5	Broiler faeces	Chicken	Farm	Henan 1	Henan	k119_214434	HAYS1JFT1-5_l500.fa-k119_214434	ISAba125_IS30_unknown	NDM-5	ISAba125_IS30_unknown-NDM-5	94	1	1	1	0
HAYS1JFT1-2	Broiler faeces	Chicken	Farm	Henan 1	Henan	k119_201475	HAYS1JFT1-2_l500.fa-k119_201475	ISAba125_IS30_unknown	NDM-5	ISAba125_IS30_unknown-NDM-5	94	1	1	1	0
HAYS3HCT2-2	Barn Floor	Environment	Farm	Henan 3	Henan	k119_845149	HAYS3HCT2-2_l500.fa-k119_845149	ISAba125_IS30_unknown	NDM-5	ISAba125_IS30_unknown-NDM-5	94	1	1	1	0
HAYS3JFT1-14	Broiler faeces	Chicken	Farm	Henan 3	Henan	k119_137488	HAYS3JFT1-14_l500.fa-k119_137488	ISAba125_IS30_unknown	NDM-5	ISAba125_IS30_unknown-NDM-5	94	1	1	1	0
HAYS3YMT2-3	Broiler Feather	Chicken	Farm	Henan 3	Henan	k119_996794	HAYS3YMT2-3_l500.fa-k119_996794	ISAba125_IS30_unknown	NDM-5	ISAba125_IS30_unknown-NDM-5	94	1	1	1	0
LNPCJFT2_11	Broiler faeces	Chicken	Farm	Liaoning 1	Liaoning	k119_153373	LNPCJFT2_11_l500.fa-k119_153373	ISAba125_IS30_unknown	NDM-5	ISAba125_IS30_unknown-NDM-5	94	1	1	1	0
SDPD1JFT1.07	Broiler faeces	Chicken	Farm	Shandong 2	Shandong	k119_68357	SDPD1JFT1.07_l500.fa-k119_68357	ISAba125_IS30_unknown	NDM-5	ISAba125_IS30_unknown-NDM-5	94	1	1	1	0
SDPD1JFT1.08	Broiler faeces	Chicken	Farm	Shandong 2	Shandong	k119_59734	SDPD1JFT1.08_l500.fa-k119_59734	ISAba125_IS30_unknown	NDM-5	ISAba125_IS30_unknown-NDM-5	94	1	1	1	0
SDPD1JFT1.11	Broiler faeces	Chicken	Farm	Shandong 2	Shandong	k119_237542	SDPD1JFT1.11_l500.fa-k119_237542	ISAba125_IS30_unknown	NDM-5	ISAba125_IS30_unknown-NDM-5	94	1	1	1	0
SDPD1JFT1.12	Broiler faeces	Chicken	Farm	Shandong 2	Shandong	k119_214322	SDPD1JFT1.12_l500.fa-k119_214322	ISAba125_IS30_unknown	NDM-5	ISAba125_IS30_unknown-NDM-5	94	1	1	1	0
SDPD1JFT1.15	Broiler faeces	Chicken	Farm	Shandong 2	Shandong	k119_544104	SDPD1JFT1.15_l500.fa-k119_544104	ISAba125_IS30_unknown	NDM-5	ISAba125_IS30_unknown-NDM-5	94	1	1	1	0
SDPD1JFT2.01	Broiler faeces	Chicken	Farm	Shandong 2	Shandong	k119_78060	SDPD1JFT2.01_l500.fa-k119_78060	ISAba125_IS30_unknown	NDM-5	ISAba125_IS30_unknown-NDM-5	94	1	1	1	0
SDPD1JFT1.06	Broiler faeces	Chicken	Farm	Shandong 2	Shandong	k119_95797	SDPD1JFT1.06_l500.fa-k119_95797	ISAba125_IS30_unknown	NDM-5	ISAba125_IS30_unknown-NDM-5	94	1	1	1	0
HAYS1JFT1-3	Broiler faeces	Chicken	Farm	Henan 1	Henan	k119_134654	HAYS1JFT1-3_l500.fa-k119_134654	ISAba3_IS1_unknown	PER-1	ISAba3_IS1_unknown-PER-1	1849	0	1	1	1
LNPCJFT1_03	Broiler faeces	Chicken	Farm	Liaoning 1	Liaoning	k119_80062	LNPCJFT1_03_l500.fa-k119_80062	ISAba3_IS1_unknown	PER-1	ISAba3_IS1_unknown-PER-1	1849	0	1	1	1
LNLDJFT2-13	Broiler faeces	Chicken	Farm	Liaoning 3	Liaoning	k119_105141	LNLDJFT2-13_l500.fa-k119_105141	ISAba3_IS1_unknown	tet(H)	ISAba3_IS1_unknown-tet(H)	247	0	1	1	1
LNLHTWT3-1	Wastewater	Environment	Slaughterhouse	Liaoning 3	Liaoning	k119_121537	LNLHTWT3-1_l500.fa-k119_121537	ISAba3_IS1_unknown	tet(H)	ISAba3_IS1_unknown-tet(H)	2439	0	1	1	1
PDDTT3S3L0507	Broiler carcass	Chicken	Slaughterhouse	Shandong 1_1	Shandong	k119_38984	PDDTT3S3L0507_l500.fa-k119_38984	ISAba3_IS1_unknown	tet(H)	ISAba3_IS1_unknown-tet(H)	2135	0	1	1	1
PDDTT3S4L0414	Broiler carcass	Chicken	Slaughterhouse	Shandong 1_1	Shandong	k119_83837	PDDTT3S4L0414_l500.fa-k119_83837	ISAba3_IS1_unknown	tet(H)	ISAba3_IS1_unknown-tet(H)	2135	0	1	1	1
PDDTT3S4L0515	Broiler carcass	Chicken	Slaughterhouse	Shandong 1_1	Shandong	k119_106973	PDDTT3S4L0515_l500.fa-k119_106973	ISAba3_IS1_unknown	tet(H)	ISAba3_IS1_unknown-tet(H)	2135	0	1	1	1
PDDTT3S3L0304	Broiler carcass	Chicken	Slaughterhouse	Shandong 1_1	Shandong	k119_30707	PDDTT3S3L0304_l500.fa-k119_30707	ISAba3_IS1_unknown	tet(H)	ISAba3_IS1_unknown-tet(H)	2135	0	1	1	1
PDDTT3S3L0405	Broiler carcass	Chicken	Slaughterhouse	Shandong 1_1	Shandong	k119_68480	PDDTT3S3L0405_l500.fa-k119_68480	ISAba3_IS1_unknown	tet(H)	ISAba3_IS1_unknown-tet(H)	2472	0	1	1	1
PDDTT3S4L0717	Broiler carcass	Chicken	Slaughterhouse	Shandong 1_1	Shandong	k119_96035	PDDTT3S4L0717_l500.fa-k119_96035	ISAba3_IS1_unknown	tet(H)	ISAba3_IS1_unknown-tet(H)	2472	0	1	1	1
SDPD4HCT2-02	Barn Floor	Environment	Farm	Shandong 4	Shandong	k119_330844	SDPD4HCT2-02_l500.fa-k119_330844	ISAba3_IS1_unknown	tet(H)	ISAba3_IS1_unknown-tet(H)	2431	0	1	1	1
SDPD4TRT1-03	Soil	Environment	Farm	Shandong 4	Shandong	k119_31453	SDPD4TRT1-03_l500.fa-k119_31453	ISAba3_IS1_unknown	tet(H)	ISAba3_IS1_unknown-tet(H)	2439	0	1	1	1
HAYS1TWT3-3	Wastewater	Environment	Slaughterhouse	Henan 1	Henan	k119_941675	HAYS1TWT3-3_l500.fa-k119_941675	ISAlw25_IS1_unknown	tet(H)	ISAlw25_IS1_unknown-tet(H)	539	0	1	1	1
HAYS2TMT3-1	Processing Line	Environment	Slaughterhouse	Henan 2	Henan	k119_850103	HAYS2TMT3-1_l500.fa-k119_850103	ISAlw25_IS1_unknown	tet(H)	ISAlw25_IS1_unknown-tet(H)	2381	0	1	1	1
HAYS2TMT3-3	Processing Line	Environment	Slaughterhouse	Henan 2	Henan	k119_538373	HAYS2TMT3-3_l500.fa-k119_538373	ISAlw25_IS1_unknown	tet(H)	ISAlw25_IS1_unknown-tet(H)	4051	0	1	1	1
HAYS2TWT3-2	Wastewater	Environment	Slaughterhouse	Henan 2	Henan	k119_382899	HAYS2TWT3-2_l500.fa-k119_382899	ISAlw25_IS1_unknown	tet(H)	ISAlw25_IS1_unknown-tet(H)	970	0	1	1	1
LNLDDMT1-01	Barn Floor	Environment	Farm	Liaoning 3	Liaoning	k119_51161	LNLDDMT1-01_l500.fa-k119_51161	ISAlw25_IS1_unknown	tet(H)	ISAlw25_IS1_unknown-tet(H)	4051	0	1	1	1
LNLDDMT2-01	Barn Floor	Environment	Farm	Liaoning 3	Liaoning	k119_459331	LNLDDMT2-01_l500.fa-k119_459331	ISAlw25_IS1_unknown	tet(H)	ISAlw25_IS1_unknown-tet(H)	4051	0	1	1	1
LNLDDMT2-02	Barn Floor	Environment	Farm	Liaoning 3	Liaoning	k119_696051	LNLDDMT2-02_l500.fa-k119_696051	ISAlw25_IS1_unknown	tet(H)	ISAlw25_IS1_unknown-tet(H)	4051	0	1	1	1
LNLDDMT2-03	Barn Floor	Environment	Farm	Liaoning 3	Liaoning	k119_247853	LNLDDMT2-03_l500.fa-k119_247853	ISAlw25_IS1_unknown	tet(H)	ISAlw25_IS1_unknown-tet(H)	4051	0	1	1	1
LNLHJTT3-4	Broiler carcass	Chicken	Slaughterhouse	Liaoning 3	Liaoning	k119_354167	LNLHJTT3-4_l500.fa-k119_354167	ISAlw25_IS1_unknown	tet(H)	ISAlw25_IS1_unknown-tet(H)	2085	0	1	1	1
LNLDJFT2-12	Broiler faeces	Chicken	Farm	Liaoning 3	Liaoning	k119_350185	LNLDJFT2-12_l500.fa-k119_350185	ISAlw25_IS1_unknown	tet(H)	ISAlw25_IS1_unknown-tet(H)	219	0	1	1	1
LNLDJFT2-13	Broiler faeces	Chicken	Farm	Liaoning 3	Liaoning	k119_105141	LNLDJFT2-13_l500.fa-k119_105141	ISAlw25_IS1_unknown	tet(H)	ISAlw25_IS1_unknown-tet(H)	219	0	1	1	1
PDDTT3S3L0507	Broiler carcass	Chicken	Slaughterhouse	Shandong 1_1	Shandong	k119_38984	PDDTT3S3L0507_l500.fa-k119_38984	ISAlw25_IS1_unknown	tet(H)	ISAlw25_IS1_unknown-tet(H)	2085	0	1	1	1
PDDTT3S4L0414	Broiler carcass	Chicken	Slaughterhouse	Shandong 1_1	Shandong	k119_83837	PDDTT3S4L0414_l500.fa-k119_83837	ISAlw25_IS1_unknown	tet(H)	ISAlw25_IS1_unknown-tet(H)	2085	0	1	1	1
PDDTT3S4L0616	Broiler carcass	Chicken	Slaughterhouse	Shandong 1_1	Shandong	k119_15421	PDDTT3S4L0616_l500.fa-k119_15421	ISAlw25_IS1_unknown	tet(H)	ISAlw25_IS1_unknown-tet(H)	2085	0	1	1	1
PDDTT3S3L0304	Broiler carcass	Chicken	Slaughterhouse	Shandong 1_1	Shandong	k119_30707	PDDTT3S3L0304_l500.fa-k119_30707	ISAlw25_IS1_unknown	tet(H)	ISAlw25_IS1_unknown-tet(H)	2085	0	1	1	1
PDDTT3S3L0405	Broiler carcass	Chicken	Slaughterhouse	Shandong 1_1	Shandong	k119_68480	PDDTT3S3L0405_l500.fa-k119_68480	ISAlw25_IS1_unknown	tet(H)	ISAlw25_IS1_unknown-tet(H)	2422	0	1	1	1
PDDTT3S4L0717	Broiler carcass	Chicken	Slaughterhouse	Shandong 1_1	Shandong	k119_96035	PDDTT3S4L0717_l500.fa-k119_96035	ISAlw25_IS1_unknown	tet(H)	ISAlw25_IS1_unknown-tet(H)	2422	0	1	1	1
SDPD1TWT3.02	Wastewater	Environment	Slaughterhouse	Shandong 2	Shandong	k119_163792	SDPD1TWT3.02_l500.fa-k119_163792	ISAlw25_IS1_unknown	tet(H)	ISAlw25_IS1_unknown-tet(H)	2085	0	1	1	1
SDPD4HCT2-02	Barn Floor	Environment	Farm	Shandong 4	Shandong	k119_330844	SDPD4HCT2-02_l500.fa-k119_330844	ISAlw25_IS1_unknown	tet(H)	ISAlw25_IS1_unknown-tet(H)	2381	0	1	1	1
SDPD4HCT1-01	Barn Floor	Environment	Farm	Shandong 4	Shandong	k119_184691	SDPD4HCT1-01_l500.fa-k119_184691	ISAlw25_IS1_unknown	tet(H)	ISAlw25_IS1_unknown-tet(H)	4051	0	1	1	1
SDPD4TRT1-03	Soil	Environment	Farm	Shandong 4	Shandong	k119_31453	SDPD4TRT1-03_l500.fa-k119_31453	ISAlw25_IS1_unknown	tet(H)	ISAlw25_IS1_unknown-tet(H)	2389	0	1	1	1
HAYS2TMT3-1	Processing Line	Environment	Slaughterhouse	Henan 2	Henan	k119_850103	HAYS2TMT3-1_l500.fa-k119_850103	ISAlw3_IS1_unknown	tet(H)	ISAlw3_IS1_unknown-tet(H)	3861	0	1	1	1
LNLHTWT3-1	Wastewater	Environment	Slaughterhouse	Liaoning 3	Liaoning	k119_121537	LNLHTWT3-1_l500.fa-k119_121537	ISAlw3_IS1_unknown	tet(H)	ISAlw3_IS1_unknown-tet(H)	4051	0	1	1	1
HAYS3JFT2-1	Broiler faeces	Chicken	Farm	Henan 3	Henan	k119_36900	HAYS3JFT2-1_l500.fa-k119_36900	ISApl1_IS30_unknown	AAC(6')-Ib-cr	ISApl1_IS30_unknown-AAC(6')-Ib-cr	526	1	1	1	0
SDPD1JFT1.14	Broiler faeces	Chicken	Farm	Shandong 2	Shandong	k119_282704	SDPD1JFT1.14_l500.fa-k119_282704	ISApl1_IS30_unknown	AAC(6')-Ib-cr	ISApl1_IS30_unknown-AAC(6')-Ib-cr	526	1	1	1	0
SDPD1YMT1.02	Broiler Feather	Chicken	Farm	Shandong 2	Shandong	k119_171670	SDPD1YMT1.02_l500.fa-k119_171670	ISApl1_IS30_unknown	AAC(6')-Ib-cr	ISApl1_IS30_unknown-AAC(6')-Ib-cr	526	1	1	1	0
HAYS1JFT1-3	Broiler faeces	Chicken	Farm	Henan 1	Henan	k119_130554	HAYS1JFT1-3_l500.fa-k119_130554	ISBbi1_IS1595_unknown	CfxA2	ISBbi1_IS1595_unknown-CfxA2	641	0	1	1	1
HAYS1JFT1-7	Broiler faeces	Chicken	Farm	Henan 1	Henan	k119_102220	HAYS1JFT1-7_l500.fa-k119_102220	ISBbi1_IS1595_unknown	CfxA2	ISBbi1_IS1595_unknown-CfxA2	641	0	1	1	1
HAYS1JFT1-8	Broiler faeces	Chicken	Farm	Henan 1	Henan	k119_305253	HAYS1JFT1-8_l500.fa-k119_305253	ISBbi1_IS1595_unknown	CfxA2	ISBbi1_IS1595_unknown-CfxA2	641	0	1	1	1
HAYS1JFT2-5	Broiler faeces	Chicken	Farm	Henan 1	Henan	k119_456175	HAYS1JFT2-5_l500.fa-k119_456175	ISBbi1_IS1595_unknown	CfxA2	ISBbi1_IS1595_unknown-CfxA2	641	0	1	1	1
HAYS1JFT1-5	Broiler faeces	Chicken	Farm	Henan 1	Henan	k119_175683	HAYS1JFT1-5_l500.fa-k119_175683	ISBbi1_IS1595_unknown	CfxA2	ISBbi1_IS1595_unknown-CfxA2	641	0	1	1	1
HAYS3HCT2-1	Barn Floor	Environment	Farm	Henan 3	Henan	k119_1026498	HAYS3HCT2-1_l500.fa-k119_1026498	ISBbi1_IS1595_unknown	CfxA2	ISBbi1_IS1595_unknown-CfxA2	17	0	1	1	1
HAYS3HCT2-2	Barn Floor	Environment	Farm	Henan 3	Henan	k119_370900	HAYS3HCT2-2_l500.fa-k119_370900	ISBbi1_IS1595_unknown	CfxA2	ISBbi1_IS1595_unknown-CfxA2	17	0	1	1	1
HAYS3JFT2-7	Broiler faeces	Chicken	Farm	Henan 3	Henan	k119_103999	HAYS3JFT2-7_l500.fa-k119_103999	ISBbi1_IS1595_unknown	CfxA2	ISBbi1_IS1595_unknown-CfxA2	17	0	1	1	1
HAYS3JFT1-7	Broiler faeces	Chicken	Farm	Henan 3	Henan	k119_108238	HAYS3JFT1-7_l500.fa-k119_108238	ISBbi1_IS1595_unknown	CfxA2	ISBbi1_IS1595_unknown-CfxA2	17	0	1	1	1
HAYS3JFT2-1	Broiler faeces	Chicken	Farm	Henan 3	Henan	k119_144086	HAYS3JFT2-1_l500.fa-k119_144086	ISBbi1_IS1595_unknown	CfxA2	ISBbi1_IS1595_unknown-CfxA2	17	0	1	1	1
HAYS3JFT2-11	Broiler faeces	Chicken	Farm	Henan 3	Henan	k119_282812	HAYS3JFT2-11_l500.fa-k119_282812	ISBbi1_IS1595_unknown	CfxA2	ISBbi1_IS1595_unknown-CfxA2	17	0	1	1	1
HAYS3JFT2-14	Broiler faeces	Chicken	Farm	Henan 3	Henan	k119_5661	HAYS3JFT2-14_l500.fa-k119_5661	ISBbi1_IS1595_unknown	CfxA2	ISBbi1_IS1595_unknown-CfxA2	17	0	1	1	1
HAYS3JFT2-2	Broiler faeces	Chicken	Farm	Henan 3	Henan	k119_100009	HAYS3JFT2-2_l500.fa-k119_100009	ISBbi1_IS1595_unknown	CfxA2	ISBbi1_IS1595_unknown-CfxA2	17	0	1	1	1
HAYS3JFT2-3	Broiler faeces	Chicken	Farm	Henan 3	Henan	k119_134573	HAYS3JFT2-3_l500.fa-k119_134573	ISBbi1_IS1595_unknown	CfxA2	ISBbi1_IS1595_unknown-CfxA2	17	0	1	1	1
HAYS3JFT2-8	Broiler faeces	Chicken	Farm	Henan 3	Henan	k119_263307	HAYS3JFT2-8_l500.fa-k119_263307	ISBbi1_IS1595_unknown	CfxA2	ISBbi1_IS1595_unknown-CfxA2	17	0	1	1	1
HAYS3YMT2-1	Broiler Feather	Chicken	Farm	Henan 3	Henan	k119_619535	HAYS3YMT2-1_l500.fa-k119_619535	ISBbi1_IS1595_unknown	CfxA2	ISBbi1_IS1595_unknown-CfxA2	17	0	1	1	1
HAYS3YMT2-3	Broiler Feather	Chicken	Farm	Henan 3	Henan	k119_1044155	HAYS3YMT2-3_l500.fa-k119_1044155	ISBbi1_IS1595_unknown	CfxA2	ISBbi1_IS1595_unknown-CfxA2	17	0	1	1	1
HAYS3YMT2-4	Broiler Feather	Chicken	Farm	Henan 3	Henan	k119_252523	HAYS3YMT2-4_l500.fa-k119_252523	ISBbi1_IS1595_unknown	CfxA2	ISBbi1_IS1595_unknown-CfxA2	17	0	1	1	1
HAYS3YMT2-5	Broiler Feather	Chicken	Farm	Henan 3	Henan	k119_80024	HAYS3YMT2-5_l500.fa-k119_80024	ISBbi1_IS1595_unknown	CfxA2	ISBbi1_IS1595_unknown-CfxA2	17	0	1	1	1
HAYS3YMT2-2	Broiler Feather	Chicken	Farm	Henan 3	Henan	k119_54840	HAYS3YMT2-2_l500.fa-k119_54840	ISBbi1_IS1595_unknown	CfxA2	ISBbi1_IS1595_unknown-CfxA2	17	0	1	1	1
HAYS3YMT1-02	Broiler Feather	Chicken	Farm	Henan 3	Henan	k119_65466	HAYS3YMT1-02_l500.fa-k119_65466	ISBbi1_IS1595_unknown	CfxA2	ISBbi1_IS1595_unknown-CfxA2	17	0	1	1	1
HAYS3YMT1-01	Broiler Feather	Chicken	Farm	Henan 3	Henan	k119_617580	HAYS3YMT1-01_l500.fa-k119_617580	ISBbi1_IS1595_unknown	CfxA2	ISBbi1_IS1595_unknown-CfxA2	17	0	1	1	1
LNPCJFT1_03	Broiler faeces	Chicken	Farm	Liaoning 1	Liaoning	k119_89936	LNPCJFT1_03_l500.fa-k119_89936	ISBbi1_IS1595_unknown	CfxA2	ISBbi1_IS1595_unknown-CfxA2	641	0	1	1	1
LNTPJFT1_06	Broiler faeces	Chicken	Farm	Liaoning 2	Liaoning	k119_124021	LNTPJFT1_06_l500.fa-k119_124021	ISBbi1_IS1595_unknown	CfxA2	ISBbi1_IS1595_unknown-CfxA2	17	0	1	1	1
SDPD4YMT2-01	Broiler Feather	Chicken	Farm	Shandong 4	Shandong	k119_209716	SDPD4YMT2-01_l500.fa-k119_209716	ISBbi1_IS1595_unknown	CfxA2	ISBbi1_IS1595_unknown-CfxA2	17	0	1	1	1
SDPD4YMT2-02	Broiler Feather	Chicken	Farm	Shandong 4	Shandong	k119_246839	SDPD4YMT2-02_l500.fa-k119_246839	ISBbi1_IS1595_unknown	CfxA2	ISBbi1_IS1595_unknown-CfxA2	17	0	1	1	1
SDPD4YMT2-04	Broiler Feather	Chicken	Farm	Shandong 4	Shandong	k119_422317	SDPD4YMT2-04_l500.fa-k119_422317	ISBbi1_IS1595_unknown	CfxA2	ISBbi1_IS1595_unknown-CfxA2	17	0	1	1	1
LNTPDMT1_02	Barn Floor	Environment	Farm	Liaoning 2	Liaoning	k119_311557	LNTPDMT1_02_l500.fa-k119_311557	ISBdi7_IS21_unknown	aadA5	ISBdi7_IS21_unknown-aadA5	3866	0	1	1	1
LNTPDMT1_03	Barn Floor	Environment	Farm	Liaoning 2	Liaoning	k119_123005	LNTPDMT1_03_l500.fa-k119_123005	ISBdi7_IS21_unknown	aadA5	ISBdi7_IS21_unknown-aadA5	3866	0	1	1	1
LNTPDMT1_03	Barn Floor	Environment	Farm	Liaoning 2	Liaoning	k119_123005	LNTPDMT1_03_l500.fa-k119_123005	ISBdi7_IS21_unknown	dfrA17	ISBdi7_IS21_unknown-dfrA17	4785	1	1	1	0
LNTPDMT1_02	Barn Floor	Environment	Farm	Liaoning 2	Liaoning	k119_311557	LNTPDMT1_02_l500.fa-k119_311557	ISBdi7_IS21_unknown	dfrA17	ISBdi7_IS21_unknown-dfrA17	4785	1	1	1	0
HAYS2JFT2-14	Broiler faeces	Chicken	Farm	Henan 2	Henan	k119_129362	HAYS2JFT2-14_l500.fa-k119_129362	ISBf8_IS4_ISPepr1	CfxA3	ISBf8_IS4_ISPepr1-CfxA3	61	0	1	1	1
LNPCJFT2_03	Broiler faeces	Chicken	Farm	Liaoning 1	Liaoning	k119_226294	LNPCJFT2_03_l500.fa-k119_226294	ISBf8_IS4_ISPepr1	CfxA3	ISBf8_IS4_ISPepr1-CfxA3	61	0	1	1	1
SDPD4JFT2-17	Broiler faeces	Chicken	Farm	Shandong 4	Shandong	k119_578145	SDPD4JFT2-17_l500.fa-k119_578145	ISBf8_IS4_ISPepr1	CfxA3	ISBf8_IS4_ISPepr1-CfxA3	61	0	1	1	1
SDPD4JFT2-07	Broiler faeces	Chicken	Farm	Shandong 4	Shandong	k119_166743	SDPD4JFT2-07_l500.fa-k119_166743	ISBf8_IS4_ISPepr1	CfxA3	ISBf8_IS4_ISPepr1-CfxA3	61	0	1	1	1
SDPD4YMT1-05	Broiler Feather	Chicken	Farm	Shandong 4	Shandong	k119_1423424	SDPD4YMT1-05_l500.fa-k119_1423424	ISBf8_IS4_ISPepr1	CfxA3	ISBf8_IS4_ISPepr1-CfxA3	61	0	1	1	1
SDPD4YMT2-05	Broiler Feather	Chicken	Farm	Shandong 4	Shandong	k119_258499	SDPD4YMT2-05_l500.fa-k119_258499	ISBf8_IS4_ISPepr1	CfxA3	ISBf8_IS4_ISPepr1-CfxA3	61	0	1	1	1
SDPD1JFT1.04	Broiler faeces	Chicken	Farm	Shandong 2	Shandong	k119_117548	SDPD1JFT1.04_l500.fa-k119_117548	ISBf9_ISAs1_unknown	CfxA3	ISBf9_ISAs1_unknown-CfxA3	1655	0	1	1	1
SDPD1JFT1.08	Broiler faeces	Chicken	Farm	Shandong 2	Shandong	k119_410000	SDPD1JFT1.08_l500.fa-k119_410000	ISBf9_ISAs1_unknown	CfxA3	ISBf9_ISAs1_unknown-CfxA3	1834	0	1	1	1
SDPD1JFT1.01	Broiler faeces	Chicken	Farm	Shandong 2	Shandong	k119_388008	SDPD1JFT1.01_l500.fa-k119_388008	ISBf9_ISAs1_unknown	CfxA3	ISBf9_ISAs1_unknown-CfxA3	1845	0	1	1	1
LNPCJFT2_05	Broiler faeces	Chicken	Farm	Liaoning 1	Liaoning	k119_93813	LNPCJFT2_05_l500.fa-k119_93813	ISC1041_IS30_unknown	NDM-1	ISC1041_IS30_unknown-NDM-1	181	0	1	1	1
LNPCJFT2_17	Broiler faeces	Chicken	Farm	Liaoning 1	Liaoning	k119_10123	LNPCJFT2_17_l500.fa-k119_10123	ISC1041_IS30_unknown	NDM-1	ISC1041_IS30_unknown-NDM-1	181	0	1	1	1
LNPCJFT2_01	Broiler faeces	Chicken	Farm	Liaoning 1	Liaoning	k119_13495	LNPCJFT2_01_l500.fa-k119_13495	ISC1041_IS30_unknown	NDM-1	ISC1041_IS30_unknown-NDM-1	181	0	1	1	1
LNPCJFT2_19	Broiler faeces	Chicken	Farm	Liaoning 1	Liaoning	k119_199781	LNPCJFT2_19_l500.fa-k119_199781	ISC1041_IS30_unknown	NDM-1	ISC1041_IS30_unknown-NDM-1	181	0	1	1	1
LNPCJFT1_10	Broiler faeces	Chicken	Farm	Liaoning 1	Liaoning	k119_134045	LNPCJFT1_10_l500.fa-k119_134045	ISC1041_IS30_unknown	NDM-1	ISC1041_IS30_unknown-NDM-1	181	0	1	1	1
LNPCJFT1_17	Broiler faeces	Chicken	Farm	Liaoning 1	Liaoning	k119_2717	LNPCJFT1_17_l500.fa-k119_2717	ISC1041_IS30_unknown	NDM-1	ISC1041_IS30_unknown-NDM-1	181	0	1	1	1
LNPCJFT1_03	Broiler faeces	Chicken	Farm	Liaoning 1	Liaoning	k119_1057675	LNPCJFT1_03_l500.fa-k119_1057675	ISC1041_IS30_unknown	NDM-1	ISC1041_IS30_unknown-NDM-1	2954	0	1	1	1
LNLDJFT1-07	Broiler faeces	Chicken	Farm	Liaoning 3	Liaoning	k119_436494	LNLDJFT1-07_l500.fa-k119_436494	ISC1041_IS30_unknown	NDM-1	ISC1041_IS30_unknown-NDM-1	181	0	1	1	1
SDPD4JFT1-08	Broiler faeces	Chicken	Farm	Shandong 4	Shandong	k119_199706	SDPD4JFT1-08_l500.fa-k119_199706	ISC1041_IS30_unknown	NDM-1	ISC1041_IS30_unknown-NDM-1	181	0	1	1	1
SDPD4JFT1-15	Broiler faeces	Chicken	Farm	Shandong 4	Shandong	k119_542505	SDPD4JFT1-15_l500.fa-k119_542505	ISC1041_IS30_unknown	NDM-1	ISC1041_IS30_unknown-NDM-1	181	0	1	1	1
SDPD4JFT2-05	Broiler faeces	Chicken	Farm	Shandong 4	Shandong	k119_799473	SDPD4JFT2-05_l500.fa-k119_799473	ISC1041_IS30_unknown	NDM-1	ISC1041_IS30_unknown-NDM-1	181	0	1	1	1
LNTPJFT1_12	Broiler faeces	Chicken	Farm	Liaoning 2	Liaoning	k119_70872	LNTPJFT1_12_l500.fa-k119_70872	ISCur2_IS256_IS1249	ErmX	ISCur2_IS256_IS1249-ErmX	212	0	1	1	1
LNTPJFT2_13	Broiler faeces	Chicken	Farm	Liaoning 2	Liaoning	k119_233769	LNTPJFT2_13_l500.fa-k119_233769	ISCur2_IS256_IS1249	ErmX	ISCur2_IS256_IS1249-ErmX	212	0	1	1	1
HAYS3HCT2-2	Barn Floor	Environment	Farm	Henan 3	Henan	k119_886340	HAYS3HCT2-2_l500.fa-k119_886340	ISCx1_ISL3_unknown	ErmX	ISCx1_ISL3_unknown-ErmX	39	0	1	1	1
HAYS3HCT2-1	Barn Floor	Environment	Farm	Henan 3	Henan	k119_209009	HAYS3HCT2-1_l500.fa-k119_209009	ISCx1_ISL3_unknown	ErmX	ISCx1_ISL3_unknown-ErmX	40	0	1	1	1
HAYS3HCT2-2	Barn Floor	Environment	Farm	Henan 3	Henan	k119_411817	HAYS3HCT2-2_l500.fa-k119_411817	ISCx1_ISL3_unknown	ErmX	ISCx1_ISL3_unknown-ErmX	40	0	1	1	1
HAYS3JFT1-13	Broiler faeces	Chicken	Farm	Henan 3	Henan	k119_58289	HAYS3JFT1-13_l500.fa-k119_58289	ISCx1_ISL3_unknown	ErmX	ISCx1_ISL3_unknown-ErmX	40	0	1	1	1
HAYS3JFT1-8	Broiler faeces	Chicken	Farm	Henan 3	Henan	k119_1067428	HAYS3JFT1-8_l500.fa-k119_1067428	ISCx1_ISL3_unknown	ErmX	ISCx1_ISL3_unknown-ErmX	40	0	1	1	1
HAYS3JFT2-7	Broiler faeces	Chicken	Farm	Henan 3	Henan	k119_196994	HAYS3JFT2-7_l500.fa-k119_196994	ISCx1_ISL3_unknown	ErmX	ISCx1_ISL3_unknown-ErmX	40	0	1	1	1
HAYS3YMT2-3	Broiler Feather	Chicken	Farm	Henan 3	Henan	k119_151312	HAYS3YMT2-3_l500.fa-k119_151312	ISCx1_ISL3_unknown	ErmX	ISCx1_ISL3_unknown-ErmX	40	0	1	1	1
HAYS3YMT2-4	Broiler Feather	Chicken	Farm	Henan 3	Henan	k119_63815	HAYS3YMT2-4_l500.fa-k119_63815	ISCx1_ISL3_unknown	ErmX	ISCx1_ISL3_unknown-ErmX	40	0	1	1	1
HAYS3YMT1-03	Broiler Feather	Chicken	Farm	Henan 3	Henan	k119_882725	HAYS3YMT1-03_l500.fa-k119_882725	ISCx1_ISL3_unknown	ErmX	ISCx1_ISL3_unknown-ErmX	40	0	1	1	1
LNPCJFT1_02	Broiler faeces	Chicken	Farm	Liaoning 1	Liaoning	k119_12106	LNPCJFT1_02_l500.fa-k119_12106	ISCx1_ISL3_unknown	ErmX	ISCx1_ISL3_unknown-ErmX	39	0	1	1	1
LNPCJFT1_15	Broiler faeces	Chicken	Farm	Liaoning 1	Liaoning	k119_57491	LNPCJFT1_15_l500.fa-k119_57491	ISCx1_ISL3_unknown	ErmX	ISCx1_ISL3_unknown-ErmX	39	0	1	1	1
LNTPJFT1_12	Broiler faeces	Chicken	Farm	Liaoning 2	Liaoning	k119_70872	LNTPJFT1_12_l500.fa-k119_70872	ISCx1_ISL3_unknown	ErmX	ISCx1_ISL3_unknown-ErmX	39	0	1	1	1
LNTPJFT2_15	Broiler faeces	Chicken	Farm	Liaoning 2	Liaoning	k119_146471	LNTPJFT2_15_l500.fa-k119_146471	ISCx1_ISL3_unknown	ErmX	ISCx1_ISL3_unknown-ErmX	39	0	1	1	1
HAYS1JFT2-7	Broiler faeces	Chicken	Farm	Henan 1	Henan	k119_91217	HAYS1JFT2-7_l500.fa-k119_91217	ISEc58_IS256_unknown	AAC(3)-VIa	ISEc58_IS256_unknown-AAC(3)-VIa	4150	1	1	1	0
LNPCJFT1_11	Broiler faeces	Chicken	Farm	Liaoning 1	Liaoning	k119_5753	LNPCJFT1_11_l500.fa-k119_5753	ISEc58_IS256_unknown	AAC(3)-VIa	ISEc58_IS256_unknown-AAC(3)-VIa	4150	1	1	1	0
LNPCJFT1_01	Broiler faeces	Chicken	Farm	Liaoning 1	Liaoning	k119_22806	LNPCJFT1_01_l500.fa-k119_22806	ISEc58_IS256_unknown	AAC(3)-VIa	ISEc58_IS256_unknown-AAC(3)-VIa	4150	1	1	1	0
LNPCJFT1_18	Broiler faeces	Chicken	Farm	Liaoning 1	Liaoning	k119_37774	LNPCJFT1_18_l500.fa-k119_37774	ISEc58_IS256_unknown	AAC(3)-VIa	ISEc58_IS256_unknown-AAC(3)-VIa	4150	1	1	1	0
LNPCJFT1_10	Broiler faeces	Chicken	Farm	Liaoning 1	Liaoning	k119_73203	LNPCJFT1_10_l500.fa-k119_73203	ISEc58_IS256_unknown	AAC(3)-VIa	ISEc58_IS256_unknown-AAC(3)-VIa	4150	1	1	1	0
PDJFL1A2	Broiler faeces	Chicken	Farm	Shandong 1_2	Shandong	k119_20821	PDJFL1A2_l500.fa-k119_20821	ISEc58_IS256_unknown	AAC(3)-VIa	ISEc58_IS256_unknown-AAC(3)-VIa	4105	1	1	1	0
SDPD3JFT1-03	Broiler faeces	Chicken	Farm	Shandong 3	Shandong	k119_128632	SDPD3JFT1-03_l500.fa-k119_128632	ISEc58_IS256_unknown	AAC(3)-VIa	ISEc58_IS256_unknown-AAC(3)-VIa	4150	1	1	1	0
SDPD3JFT1-19	Broiler faeces	Chicken	Farm	Shandong 3	Shandong	k119_113051	SDPD3JFT1-19_l500.fa-k119_113051	ISEc58_IS256_unknown	AAC(3)-VIa	ISEc58_IS256_unknown-AAC(3)-VIa	4150	1	1	1	0
SDPD3JFT1-20	Broiler faeces	Chicken	Farm	Shandong 3	Shandong	k119_9696	SDPD3JFT1-20_l500.fa-k119_9696	ISEc58_IS256_unknown	AAC(3)-VIa	ISEc58_IS256_unknown-AAC(3)-VIa	4150	1	1	1	0
LNLDJFT1-07	Broiler faeces	Chicken	Farm	Liaoning 3	Liaoning	k119_514187	LNLDJFT1-07_l500.fa-k119_514187	ISEc9_IS1380_unknown	cfrC	ISEc9_IS1380_unknown-cfrC	26	0	1	1	1
SDPD4HCT2-03	Barn Floor	Environment	Farm	Shandong 4	Shandong	k119_603139	SDPD4HCT2-03_l500.fa-k119_603139	ISEc9_IS1380_unknown	cfrC	ISEc9_IS1380_unknown-cfrC	26	0	1	1	1
SDPD4JFT1-01	Broiler faeces	Chicken	Farm	Shandong 4	Shandong	k119_51357	SDPD4JFT1-01_l500.fa-k119_51357	ISEc9_IS1380_unknown	cfrC	ISEc9_IS1380_unknown-cfrC	26	0	1	1	1
SDPD4JFT1-05	Broiler faeces	Chicken	Farm	Shandong 4	Shandong	k119_458998	SDPD4JFT1-05_l500.fa-k119_458998	ISEc9_IS1380_unknown	cfrC	ISEc9_IS1380_unknown-cfrC	26	0	1	1	1
HAYS1JFT1-4	Broiler faeces	Chicken	Farm	Henan 1	Henan	k119_9229	HAYS1JFT1-4_l500.fa-k119_9229	ISEc9_IS1380_unknown	CTX-M-15	ISEc9_IS1380_unknown-CTX-M-15	128	1	1	1	0
HAYS1JFT2-4	Broiler faeces	Chicken	Farm	Henan 1	Henan	k119_204760	HAYS1JFT2-4_l500.fa-k119_204760	ISEc9_IS1380_unknown	CTX-M-15	ISEc9_IS1380_unknown-CTX-M-15	128	1	1	1	0
HAYS1JFT2-6	Broiler faeces	Chicken	Farm	Henan 1	Henan	k119_35536	HAYS1JFT2-6_l500.fa-k119_35536	ISEc9_IS1380_unknown	CTX-M-15	ISEc9_IS1380_unknown-CTX-M-15	128	1	1	1	0
HAYS1JFT2-8	Broiler faeces	Chicken	Farm	Henan 1	Henan	k119_120962	HAYS1JFT2-8_l500.fa-k119_120962	ISEc9_IS1380_unknown	CTX-M-15	ISEc9_IS1380_unknown-CTX-M-15	128	1	1	1	0
HAYS3JFT1-4	Broiler faeces	Chicken	Farm	Henan 3	Henan	k119_32095	HAYS3JFT1-4_l500.fa-k119_32095	ISEc9_IS1380_unknown	CTX-M-15	ISEc9_IS1380_unknown-CTX-M-15	128	1	1	1	0
LNPCJFT1_18	Broiler faeces	Chicken	Farm	Liaoning 1	Liaoning	k119_40742	LNPCJFT1_18_l500.fa-k119_40742	ISEc9_IS1380_unknown	CTX-M-15	ISEc9_IS1380_unknown-CTX-M-15	46	1	1	1	0
LNPCJFT1_15	Broiler faeces	Chicken	Farm	Liaoning 1	Liaoning	k119_67121	LNPCJFT1_15_l500.fa-k119_67121	ISEc9_IS1380_unknown	CTX-M-15	ISEc9_IS1380_unknown-CTX-M-15	128	1	1	1	0
LNTPDMT1_01	Barn Floor	Environment	Farm	Liaoning 2	Liaoning	k119_1098234	LNTPDMT1_01_l500.fa-k119_1098234	ISEc9_IS1380_unknown	CTX-M-15	ISEc9_IS1380_unknown-CTX-M-15	128	1	1	1	0
LNTPJFT2_17	Broiler faeces	Chicken	Farm	Liaoning 2	Liaoning	k119_493372	LNTPJFT2_17_l500.fa-k119_493372	ISEc9_IS1380_unknown	CTX-M-15	ISEc9_IS1380_unknown-CTX-M-15	46	1	1	1	0
LNLDJFT1-14	Broiler faeces	Chicken	Farm	Liaoning 3	Liaoning	k119_66755	LNLDJFT1-14_l500.fa-k119_66755	ISEc9_IS1380_unknown	CTX-M-15	ISEc9_IS1380_unknown-CTX-M-15	49	1	1	1	0
LNLDJFT1-07	Broiler faeces	Chicken	Farm	Liaoning 3	Liaoning	k119_206742	LNLDJFT1-07_l500.fa-k119_206742	ISEc9_IS1380_unknown	CTX-M-15	ISEc9_IS1380_unknown-CTX-M-15	128	1	1	1	0
HAYS1JFT1-2	Broiler faeces	Chicken	Farm	Henan 1	Henan	k119_112780	HAYS1JFT1-2_l500.fa-k119_112780	ISEc9_IS1380_unknown	CTX-M-24	ISEc9_IS1380_unknown-CTX-M-24	43	1	1	1	0
HAYS1JFT1-5	Broiler faeces	Chicken	Farm	Henan 1	Henan	k119_104033	HAYS1JFT1-5_l500.fa-k119_104033	ISEc9_IS1380_unknown	CTX-M-24	ISEc9_IS1380_unknown-CTX-M-24	43	1	1	1	0
HAYS1TWT3-1	Wastewater	Environment	Slaughterhouse	Henan 1	Henan	k119_2585277	HAYS1TWT3-1_l500.fa-k119_2585277	ISEc9_IS1380_unknown	CTX-M-24	ISEc9_IS1380_unknown-CTX-M-24	43	1	1	1	0
HAYS2JFT1-8	Broiler faeces	Chicken	Farm	Henan 2	Henan	k119_16158	HAYS2JFT1-8_l500.fa-k119_16158	ISEc9_IS1380_unknown	CTX-M-24	ISEc9_IS1380_unknown-CTX-M-24	43	1	1	1	0
HAYS2YMT1-3	Broiler Feather	Chicken	Farm	Henan 2	Henan	k119_135227	HAYS2YMT1-3_l500.fa-k119_135227	ISEc9_IS1380_unknown	CTX-M-24	ISEc9_IS1380_unknown-CTX-M-24	43	1	1	1	0
HAYS2YMT2-2	Broiler Feather	Chicken	Farm	Henan 2	Henan	k119_253601	HAYS2YMT2-2_l500.fa-k119_253601	ISEc9_IS1380_unknown	CTX-M-24	ISEc9_IS1380_unknown-CTX-M-24	43	1	1	1	0
LNPCJFT1_18	Broiler faeces	Chicken	Farm	Liaoning 1	Liaoning	k119_35035	LNPCJFT1_18_l500.fa-k119_35035	ISEc9_IS1380_unknown	CTX-M-24	ISEc9_IS1380_unknown-CTX-M-24	43	1	1	1	0
LNPCJFT2_01	Broiler faeces	Chicken	Farm	Liaoning 1	Liaoning	k119_1083880	LNPCJFT2_01_l500.fa-k119_1083880	ISEc9_IS1380_unknown	CTX-M-24	ISEc9_IS1380_unknown-CTX-M-24	43	1	1	1	0
LNPCJFT2_02	Broiler faeces	Chicken	Farm	Liaoning 1	Liaoning	k119_420675	LNPCJFT2_02_l500.fa-k119_420675	ISEc9_IS1380_unknown	CTX-M-24	ISEc9_IS1380_unknown-CTX-M-24	43	1	1	1	0
LNPCJFT2_10	Broiler faeces	Chicken	Farm	Liaoning 1	Liaoning	k119_561283	LNPCJFT2_10_l500.fa-k119_561283	ISEc9_IS1380_unknown	CTX-M-24	ISEc9_IS1380_unknown-CTX-M-24	43	1	1	1	0
LNTPJFT2_01	Broiler faeces	Chicken	Farm	Liaoning 2	Liaoning	k119_499474	LNTPJFT2_01_l500.fa-k119_499474	ISEc9_IS1380_unknown	CTX-M-24	ISEc9_IS1380_unknown-CTX-M-24	43	1	1	1	0
SDPD1JTT3.14	Broiler carcass	Chicken	Slaughterhouse	Shandong 2	Shandong	k119_190473	SDPD1JTT3.14_l500.fa-k119_190473	ISEc9_IS1380_unknown	CTX-M-24	ISEc9_IS1380_unknown-CTX-M-24	43	1	1	1	0
SDPD1JFT1.09	Broiler faeces	Chicken	Farm	Shandong 2	Shandong	k119_85007	SDPD1JFT1.09_l500.fa-k119_85007	ISEc9_IS1380_unknown	CTX-M-24	ISEc9_IS1380_unknown-CTX-M-24	43	1	1	1	0
SDPD1JFT1.05	Broiler faeces	Chicken	Farm	Shandong 2	Shandong	k119_183454	SDPD1JFT1.05_l500.fa-k119_183454	ISEc9_IS1380_unknown	CTX-M-24	ISEc9_IS1380_unknown-CTX-M-24	43	1	1	1	0
SDPD3JFT1-13	Broiler faeces	Chicken	Farm	Shandong 3	Shandong	k119_142397	SDPD3JFT1-13_l500.fa-k119_142397	ISEc9_IS1380_unknown	CTX-M-24	ISEc9_IS1380_unknown-CTX-M-24	43	1	1	1	0
SDPD4JFT1-05	Broiler faeces	Chicken	Farm	Shandong 4	Shandong	k119_802447	SDPD4JFT1-05_l500.fa-k119_802447	ISEc9_IS1380_unknown	CTX-M-24	ISEc9_IS1380_unknown-CTX-M-24	43	1	1	1	0
SDPD4JFT2-17	Broiler faeces	Chicken	Farm	Shandong 4	Shandong	k119_859920	SDPD4JFT2-17_l500.fa-k119_859920	ISEc9_IS1380_unknown	CTX-M-24	ISEc9_IS1380_unknown-CTX-M-24	43	1	1	1	0
SDPD4YMT1-01	Broiler Feather	Chicken	Farm	Shandong 4	Shandong	k119_138852	SDPD4YMT1-01_l500.fa-k119_138852	ISEc9_IS1380_unknown	CTX-M-24	ISEc9_IS1380_unknown-CTX-M-24	43	1	1	1	0
SDPD4YMT1-04	Broiler Feather	Chicken	Farm	Shandong 4	Shandong	k119_913926	SDPD4YMT1-04_l500.fa-k119_913926	ISEc9_IS1380_unknown	CTX-M-24	ISEc9_IS1380_unknown-CTX-M-24	43	1	1	1	0
SDPD4YMT2-01	Broiler Feather	Chicken	Farm	Shandong 4	Shandong	k119_1022627	SDPD4YMT2-01_l500.fa-k119_1022627	ISEc9_IS1380_unknown	CTX-M-24	ISEc9_IS1380_unknown-CTX-M-24	43	1	1	1	0
HAYS1JTT3-6	Broiler carcass	Chicken	Slaughterhouse	Henan 1	Henan	k119_132132	HAYS1JTT3-6_l500.fa-k119_132132	ISEc9_IS1380_unknown	CTX-M-55	ISEc9_IS1380_unknown-CTX-M-55	128	1	1	1	0
HAYS1JFT1-1	Broiler faeces	Chicken	Farm	Henan 1	Henan	k119_42780	HAYS1JFT1-1_l500.fa-k119_42780	ISEc9_IS1380_unknown	CTX-M-55	ISEc9_IS1380_unknown-CTX-M-55	128	1	1	1	0
HAYS1JFT1-3	Broiler faeces	Chicken	Farm	Henan 1	Henan	k119_5772	HAYS1JFT1-3_l500.fa-k119_5772	ISEc9_IS1380_unknown	CTX-M-55	ISEc9_IS1380_unknown-CTX-M-55	128	1	1	1	0
HAYS1JFT1-7	Broiler faeces	Chicken	Farm	Henan 1	Henan	k119_118002	HAYS1JFT1-7_l500.fa-k119_118002	ISEc9_IS1380_unknown	CTX-M-55	ISEc9_IS1380_unknown-CTX-M-55	128	1	1	1	0
HAYS1JFT2-1	Broiler faeces	Chicken	Farm	Henan 1	Henan	k119_126425	HAYS1JFT2-1_l500.fa-k119_126425	ISEc9_IS1380_unknown	CTX-M-55	ISEc9_IS1380_unknown-CTX-M-55	128	1	1	1	0
HAYS1JFT2-3	Broiler faeces	Chicken	Farm	Henan 1	Henan	k119_636094	HAYS1JFT2-3_l500.fa-k119_636094	ISEc9_IS1380_unknown	CTX-M-55	ISEc9_IS1380_unknown-CTX-M-55	128	1	1	1	0
HAYS1JFT2-7	Broiler faeces	Chicken	Farm	Henan 1	Henan	k119_787528	HAYS1JFT2-7_l500.fa-k119_787528	ISEc9_IS1380_unknown	CTX-M-55	ISEc9_IS1380_unknown-CTX-M-55	128	1	1	1	0
HAYS1JFT1-5	Broiler faeces	Chicken	Farm	Henan 1	Henan	k119_56651	HAYS1JFT1-5_l500.fa-k119_56651	ISEc9_IS1380_unknown	CTX-M-55	ISEc9_IS1380_unknown-CTX-M-55	128	1	1	1	0
HAYS1JFT1-6	Broiler faeces	Chicken	Farm	Henan 1	Henan	k119_196941	HAYS1JFT1-6_l500.fa-k119_196941	ISEc9_IS1380_unknown	CTX-M-55	ISEc9_IS1380_unknown-CTX-M-55	128	1	1	1	0
HAYS1JFT2-2	Broiler faeces	Chicken	Farm	Henan 1	Henan	k119_67302	HAYS1JFT2-2_l500.fa-k119_67302	ISEc9_IS1380_unknown	CTX-M-55	ISEc9_IS1380_unknown-CTX-M-55	128	1	1	1	0
HAYS1TWT3-1	Wastewater	Environment	Slaughterhouse	Henan 1	Henan	k119_2474151	HAYS1TWT3-1_l500.fa-k119_2474151	ISEc9_IS1380_unknown	CTX-M-55	ISEc9_IS1380_unknown-CTX-M-55	128	1	1	1	0
HAYS2JFT1-11	Broiler faeces	Chicken	Farm	Henan 2	Henan	k119_148900	HAYS2JFT1-11_l500.fa-k119_148900	ISEc9_IS1380_unknown	CTX-M-55	ISEc9_IS1380_unknown-CTX-M-55	46	1	1	1	0
HAYS2JFT1-8	Broiler faeces	Chicken	Farm	Henan 2	Henan	k119_334413	HAYS2JFT1-8_l500.fa-k119_334413	ISEc9_IS1380_unknown	CTX-M-55	ISEc9_IS1380_unknown-CTX-M-55	46	1	1	1	0
HAYS2JFT2-11	Broiler faeces	Chicken	Farm	Henan 2	Henan	k119_36617	HAYS2JFT2-11_l500.fa-k119_36617	ISEc9_IS1380_unknown	CTX-M-55	ISEc9_IS1380_unknown-CTX-M-55	128	1	1	1	0
HAYS2JFT2-14	Broiler faeces	Chicken	Farm	Henan 2	Henan	k119_281194	HAYS2JFT2-14_l500.fa-k119_281194	ISEc9_IS1380_unknown	CTX-M-55	ISEc9_IS1380_unknown-CTX-M-55	128	1	1	1	0
HAYS2JFT1-12	Broiler faeces	Chicken	Farm	Henan 2	Henan	k119_156976	HAYS2JFT1-12_l500.fa-k119_156976	ISEc9_IS1380_unknown	CTX-M-55	ISEc9_IS1380_unknown-CTX-M-55	128	1	1	1	0
HAYS2YMT2-2	Broiler Feather	Chicken	Farm	Henan 2	Henan	k119_124034	HAYS2YMT2-2_l500.fa-k119_124034	ISEc9_IS1380_unknown	CTX-M-55	ISEc9_IS1380_unknown-CTX-M-55	46	1	1	1	0
HAYS2YMT2-3	Broiler Feather	Chicken	Farm	Henan 2	Henan	k119_1060082	HAYS2YMT2-3_l500.fa-k119_1060082	ISEc9_IS1380_unknown	CTX-M-55	ISEc9_IS1380_unknown-CTX-M-55	46	1	1	1	0
HAYS2YMT2-4	Broiler Feather	Chicken	Farm	Henan 2	Henan	k119_1362050	HAYS2YMT2-4_l500.fa-k119_1362050	ISEc9_IS1380_unknown	CTX-M-55	ISEc9_IS1380_unknown-CTX-M-55	46	1	1	1	0
HAYS2YMT1-2	Broiler Feather	Chicken	Farm	Henan 2	Henan	k119_131834	HAYS2YMT1-2_l500.fa-k119_131834	ISEc9_IS1380_unknown	CTX-M-55	ISEc9_IS1380_unknown-CTX-M-55	128	1	1	1	0
HAYS2YMT1-1	Broiler Feather	Chicken	Farm	Henan 2	Henan	k119_31896	HAYS2YMT1-1_l500.fa-k119_31896	ISEc9_IS1380_unknown	CTX-M-55	ISEc9_IS1380_unknown-CTX-M-55	128	1	1	1	0
HAYS2YMT1-3	Broiler Feather	Chicken	Farm	Henan 2	Henan	k119_28515	HAYS2YMT1-3_l500.fa-k119_28515	ISEc9_IS1380_unknown	CTX-M-55	ISEc9_IS1380_unknown-CTX-M-55	128	1	1	1	0
HAYS2YMT1-5	Broiler Feather	Chicken	Farm	Henan 2	Henan	k119_877545	HAYS2YMT1-5_l500.fa-k119_877545	ISEc9_IS1380_unknown	CTX-M-55	ISEc9_IS1380_unknown-CTX-M-55	128	1	1	1	0
HAYS2YMT2-5	Broiler Feather	Chicken	Farm	Henan 2	Henan	k119_145904	HAYS2YMT2-5_l500.fa-k119_145904	ISEc9_IS1380_unknown	CTX-M-55	ISEc9_IS1380_unknown-CTX-M-55	128	1	1	1	0
HAYS2YMT2-1	Broiler Feather	Chicken	Farm	Henan 2	Henan	k119_1012280	HAYS2YMT2-1_l500.fa-k119_1012280	ISEc9_IS1380_unknown	CTX-M-55	ISEc9_IS1380_unknown-CTX-M-55	128	1	1	1	0
HAYS3HCT2-1	Barn Floor	Environment	Farm	Henan 3	Henan	k119_1357554	HAYS3HCT2-1_l500.fa-k119_1357554	ISEc9_IS1380_unknown	CTX-M-55	ISEc9_IS1380_unknown-CTX-M-55	128	1	1	1	0
HAYS3JFT1-8	Broiler faeces	Chicken	Farm	Henan 3	Henan	k119_889745	HAYS3JFT1-8_l500.fa-k119_889745	ISEc9_IS1380_unknown	CTX-M-55	ISEc9_IS1380_unknown-CTX-M-55	46	1	1	1	0
HAYS3JFT2-12	Broiler faeces	Chicken	Farm	Henan 3	Henan	k119_184111	HAYS3JFT2-12_l500.fa-k119_184111	ISEc9_IS1380_unknown	CTX-M-55	ISEc9_IS1380_unknown-CTX-M-55	46	1	1	1	0
HAYS3JFT1-1	Broiler faeces	Chicken	Farm	Henan 3	Henan	k119_45528	HAYS3JFT1-1_l500.fa-k119_45528	ISEc9_IS1380_unknown	CTX-M-55	ISEc9_IS1380_unknown-CTX-M-55	128	1	1	1	0
HAYS3JFT1-13	Broiler faeces	Chicken	Farm	Henan 3	Henan	k119_38648	HAYS3JFT1-13_l500.fa-k119_38648	ISEc9_IS1380_unknown	CTX-M-55	ISEc9_IS1380_unknown-CTX-M-55	128	1	1	1	0
HAYS3JFT1-14	Broiler faeces	Chicken	Farm	Henan 3	Henan	k119_269452	HAYS3JFT1-14_l500.fa-k119_269452	ISEc9_IS1380_unknown	CTX-M-55	ISEc9_IS1380_unknown-CTX-M-55	128	1	1	1	0
HAYS3JFT1-15	Broiler faeces	Chicken	Farm	Henan 3	Henan	k119_495237	HAYS3JFT1-15_l500.fa-k119_495237	ISEc9_IS1380_unknown	CTX-M-55	ISEc9_IS1380_unknown-CTX-M-55	128	1	1	1	0
HAYS3JFT1-7	Broiler faeces	Chicken	Farm	Henan 3	Henan	k119_71087	HAYS3JFT1-7_l500.fa-k119_71087	ISEc9_IS1380_unknown	CTX-M-55	ISEc9_IS1380_unknown-CTX-M-55	128	1	1	1	0
HAYS3JFT2-11	Broiler faeces	Chicken	Farm	Henan 3	Henan	k119_44834	HAYS3JFT2-11_l500.fa-k119_44834	ISEc9_IS1380_unknown	CTX-M-55	ISEc9_IS1380_unknown-CTX-M-55	128	1	1	1	0
HAYS3JFT2-2	Broiler faeces	Chicken	Farm	Henan 3	Henan	k119_218453	HAYS3JFT2-2_l500.fa-k119_218453	ISEc9_IS1380_unknown	CTX-M-55	ISEc9_IS1380_unknown-CTX-M-55	128	1	1	1	0
HAYS3JFT2-8	Broiler faeces	Chicken	Farm	Henan 3	Henan	k119_213811	HAYS3JFT2-8_l500.fa-k119_213811	ISEc9_IS1380_unknown	CTX-M-55	ISEc9_IS1380_unknown-CTX-M-55	128	1	1	1	0
HAYS3JFT1-2	Broiler faeces	Chicken	Farm	Henan 3	Henan	k119_430700	HAYS3JFT1-2_l500.fa-k119_430700	ISEc9_IS1380_unknown	CTX-M-55	ISEc9_IS1380_unknown-CTX-M-55	128	1	1	1	0
HAYS3JFT1-11	Broiler faeces	Chicken	Farm	Henan 3	Henan	k119_18797	HAYS3JFT1-11_l500.fa-k119_18797	ISEc9_IS1380_unknown	CTX-M-55	ISEc9_IS1380_unknown-CTX-M-55	128	1	1	1	0
HAYS3JFT2-15	Broiler faeces	Chicken	Farm	Henan 3	Henan	k119_322782	HAYS3JFT2-15_l500.fa-k119_322782	ISEc9_IS1380_unknown	CTX-M-55	ISEc9_IS1380_unknown-CTX-M-55	128	1	1	1	0
HAYS3YMT2-3	Broiler Feather	Chicken	Farm	Henan 3	Henan	k119_1148252	HAYS3YMT2-3_l500.fa-k119_1148252	ISEc9_IS1380_unknown	CTX-M-55	ISEc9_IS1380_unknown-CTX-M-55	46	1	1	1	0
HAYS3YMT2-4	Broiler Feather	Chicken	Farm	Henan 3	Henan	k119_310609	HAYS3YMT2-4_l500.fa-k119_310609	ISEc9_IS1380_unknown	CTX-M-55	ISEc9_IS1380_unknown-CTX-M-55	128	1	1	1	0
HAYS3YMT2-5	Broiler Feather	Chicken	Farm	Henan 3	Henan	k119_206790	HAYS3YMT2-5_l500.fa-k119_206790	ISEc9_IS1380_unknown	CTX-M-55	ISEc9_IS1380_unknown-CTX-M-55	128	1	1	1	0
HAYS3YMT1-01	Broiler Feather	Chicken	Farm	Henan 3	Henan	k119_936158	HAYS3YMT1-01_l500.fa-k119_936158	ISEc9_IS1380_unknown	CTX-M-55	ISEc9_IS1380_unknown-CTX-M-55	128	1	1	1	0
HAYS3YMT1-02	Broiler Feather	Chicken	Farm	Henan 3	Henan	k119_181855	HAYS3YMT1-02_l500.fa-k119_181855	ISEc9_IS1380_unknown	CTX-M-55	ISEc9_IS1380_unknown-CTX-M-55	128	1	1	1	0
HAYS3YMT1-03	Broiler Feather	Chicken	Farm	Henan 3	Henan	k119_156745	HAYS3YMT1-03_l500.fa-k119_156745	ISEc9_IS1380_unknown	CTX-M-55	ISEc9_IS1380_unknown-CTX-M-55	128	1	1	1	0
HAYS3YMT1-04	Broiler Feather	Chicken	Farm	Henan 3	Henan	k119_608005	HAYS3YMT1-04_l500.fa-k119_608005	ISEc9_IS1380_unknown	CTX-M-55	ISEc9_IS1380_unknown-CTX-M-55	128	1	1	1	0
LNPCDMT2_03	Barn Floor	Environment	Farm	Liaoning 1	Liaoning	k119_563334	LNPCDMT2_03_l500.fa-k119_563334	ISEc9_IS1380_unknown	CTX-M-55	ISEc9_IS1380_unknown-CTX-M-55	46	1	1	1	0
LNPCJFT1_08	Broiler faeces	Chicken	Farm	Liaoning 1	Liaoning	k119_55776	LNPCJFT1_08_l500.fa-k119_55776	ISEc9_IS1380_unknown	CTX-M-55	ISEc9_IS1380_unknown-CTX-M-55	46	1	1	1	0
LNPCJFT2_19	Broiler faeces	Chicken	Farm	Liaoning 1	Liaoning	k119_36874	LNPCJFT2_19_l500.fa-k119_36874	ISEc9_IS1380_unknown	CTX-M-55	ISEc9_IS1380_unknown-CTX-M-55	128	1	1	1	0
LNPCJFT1_11	Broiler faeces	Chicken	Farm	Liaoning 1	Liaoning	k119_15117	LNPCJFT1_11_l500.fa-k119_15117	ISEc9_IS1380_unknown	CTX-M-55	ISEc9_IS1380_unknown-CTX-M-55	128	1	1	1	0
LNPCJFT1_17	Broiler faeces	Chicken	Farm	Liaoning 1	Liaoning	k119_92852	LNPCJFT1_17_l500.fa-k119_92852	ISEc9_IS1380_unknown	CTX-M-55	ISEc9_IS1380_unknown-CTX-M-55	128	1	1	1	0
LNPCJFT2_01	Broiler faeces	Chicken	Farm	Liaoning 1	Liaoning	k119_236122	LNPCJFT2_01_l500.fa-k119_236122	ISEc9_IS1380_unknown	CTX-M-55	ISEc9_IS1380_unknown-CTX-M-55	128	1	1	1	0
LNPCJFT2_02	Broiler faeces	Chicken	Farm	Liaoning 1	Liaoning	k119_430960	LNPCJFT2_02_l500.fa-k119_430960	ISEc9_IS1380_unknown	CTX-M-55	ISEc9_IS1380_unknown-CTX-M-55	128	1	1	1	0
LNPCJFT2_09	Broiler faeces	Chicken	Farm	Liaoning 1	Liaoning	k119_290468	LNPCJFT2_09_l500.fa-k119_290468	ISEc9_IS1380_unknown	CTX-M-55	ISEc9_IS1380_unknown-CTX-M-55	128	1	1	1	0
LNPCJFT2_11	Broiler faeces	Chicken	Farm	Liaoning 1	Liaoning	k119_455801	LNPCJFT2_11_l500.fa-k119_455801	ISEc9_IS1380_unknown	CTX-M-55	ISEc9_IS1380_unknown-CTX-M-55	128	1	1	1	0
LNPCJFT2_07	Broiler faeces	Chicken	Farm	Liaoning 1	Liaoning	k119_78864	LNPCJFT2_07_l500.fa-k119_78864	ISEc9_IS1380_unknown	CTX-M-55	ISEc9_IS1380_unknown-CTX-M-55	128	1	1	1	0
LNPCJFT2_05	Broiler faeces	Chicken	Farm	Liaoning 1	Liaoning	k119_346125	LNPCJFT2_05_l500.fa-k119_346125	ISEc9_IS1380_unknown	CTX-M-55	ISEc9_IS1380_unknown-CTX-M-55	128	1	1	1	0
LNPCJFT2_17	Broiler faeces	Chicken	Farm	Liaoning 1	Liaoning	k119_132160	LNPCJFT2_17_l500.fa-k119_132160	ISEc9_IS1380_unknown	CTX-M-55	ISEc9_IS1380_unknown-CTX-M-55	128	1	1	1	0
LNPCJFT2_18	Broiler faeces	Chicken	Farm	Liaoning 1	Liaoning	k119_93557	LNPCJFT2_18_l500.fa-k119_93557	ISEc9_IS1380_unknown	CTX-M-55	ISEc9_IS1380_unknown-CTX-M-55	128	1	1	1	0
LNTPDMT2_03	Barn Floor	Environment	Farm	Liaoning 2	Liaoning	k119_497059	LNTPDMT2_03_l500.fa-k119_497059	ISEc9_IS1380_unknown	CTX-M-55	ISEc9_IS1380_unknown-CTX-M-55	49	1	1	1	0
LNTPJFT2_01	Broiler faeces	Chicken	Farm	Liaoning 2	Liaoning	k119_381611	LNTPJFT2_01_l500.fa-k119_381611	ISEc9_IS1380_unknown	CTX-M-55	ISEc9_IS1380_unknown-CTX-M-55	46	1	1	1	0
LNTPJFT1_06	Broiler faeces	Chicken	Farm	Liaoning 2	Liaoning	k119_222088	LNTPJFT1_06_l500.fa-k119_222088	ISEc9_IS1380_unknown	CTX-M-55	ISEc9_IS1380_unknown-CTX-M-55	128	1	1	1	0
LNTPJFT1_04	Broiler faeces	Chicken	Farm	Liaoning 2	Liaoning	k119_59088	LNTPJFT1_04_l500.fa-k119_59088	ISEc9_IS1380_unknown	CTX-M-55	ISEc9_IS1380_unknown-CTX-M-55	128	1	1	1	0
LNTPJFT1_12	Broiler faeces	Chicken	Farm	Liaoning 2	Liaoning	k119_107962	LNTPJFT1_12_l500.fa-k119_107962	ISEc9_IS1380_unknown	CTX-M-55	ISEc9_IS1380_unknown-CTX-M-55	128	1	1	1	0
LNTPJFT1_02	Broiler faeces	Chicken	Farm	Liaoning 2	Liaoning	k119_173661	LNTPJFT1_02_l500.fa-k119_173661	ISEc9_IS1380_unknown	CTX-M-55	ISEc9_IS1380_unknown-CTX-M-55	128	1	1	1	0
LNTPJFT1_09	Broiler faeces	Chicken	Farm	Liaoning 2	Liaoning	k119_34020	LNTPJFT1_09_l500.fa-k119_34020	ISEc9_IS1380_unknown	CTX-M-55	ISEc9_IS1380_unknown-CTX-M-55	128	1	1	1	0
LNTPJFT2_11	Broiler faeces	Chicken	Farm	Liaoning 2	Liaoning	k119_5943	LNTPJFT2_11_l500.fa-k119_5943	ISEc9_IS1380_unknown	CTX-M-55	ISEc9_IS1380_unknown-CTX-M-55	128	1	1	1	0
LNTPJFT2_15	Broiler faeces	Chicken	Farm	Liaoning 2	Liaoning	k119_55029	LNTPJFT2_15_l500.fa-k119_55029	ISEc9_IS1380_unknown	CTX-M-55	ISEc9_IS1380_unknown-CTX-M-55	128	1	1	1	0
LNTPJFT1_16	Broiler faeces	Chicken	Farm	Liaoning 2	Liaoning	k119_94091	LNTPJFT1_16_l500.fa-k119_94091	ISEc9_IS1380_unknown	CTX-M-55	ISEc9_IS1380_unknown-CTX-M-55	128	1	1	1	0
LNLDJFT1-17	Broiler faeces	Chicken	Farm	Liaoning 3	Liaoning	k119_250	LNLDJFT1-17_l500.fa-k119_250	ISEc9_IS1380_unknown	CTX-M-55	ISEc9_IS1380_unknown-CTX-M-55	128	1	1	1	0
LNLDJFT2-19	Broiler faeces	Chicken	Farm	Liaoning 3	Liaoning	k119_1024847	LNLDJFT2-19_l500.fa-k119_1024847	ISEc9_IS1380_unknown	CTX-M-55	ISEc9_IS1380_unknown-CTX-M-55	128	1	1	1	0
LNLDJFT1-05	Broiler faeces	Chicken	Farm	Liaoning 3	Liaoning	k119_65289	LNLDJFT1-05_l500.fa-k119_65289	ISEc9_IS1380_unknown	CTX-M-55	ISEc9_IS1380_unknown-CTX-M-55	128	1	1	1	0
PDDTT3S4L0820	Broiler carcass	Chicken	Slaughterhouse	Shandong 1_1	Shandong	k119_46860	PDDTT3S4L0820_l500.fa-k119_46860	ISEc9_IS1380_unknown	CTX-M-55	ISEc9_IS1380_unknown-CTX-M-55	128	1	1	1	0
PDJFT1S3L0610	Broiler faeces	Chicken	Farm	Shandong 1_1	Shandong	k119_190266	PDJFT1S3L0610_l500.fa-k119_190266	ISEc9_IS1380_unknown	CTX-M-55	ISEc9_IS1380_unknown-CTX-M-55	128	1	1	1	0
PDJFT1S3L0508	Broiler faeces	Chicken	Farm	Shandong 1_1	Shandong	k119_34597	PDJFT1S3L0508_l500.fa-k119_34597	ISEc9_IS1380_unknown	CTX-M-55	ISEc9_IS1380_unknown-CTX-M-55	128	1	1	1	0
PDJFT1S3L0202	Broiler faeces	Chicken	Farm	Shandong 1_1	Shandong	k119_437491	PDJFT1S3L0202_l500.fa-k119_437491	ISEc9_IS1380_unknown	CTX-M-55	ISEc9_IS1380_unknown-CTX-M-55	128	1	1	1	0
PDJFT1S3L0303	Broiler faeces	Chicken	Farm	Shandong 1_1	Shandong	k119_2675	PDJFT1S3L0303_l500.fa-k119_2675	ISEc9_IS1380_unknown	CTX-M-55	ISEc9_IS1380_unknown-CTX-M-55	128	1	1	1	0
PDJFT1S3L0304	Broiler faeces	Chicken	Farm	Shandong 1_1	Shandong	k119_55258	PDJFT1S3L0304_l500.fa-k119_55258	ISEc9_IS1380_unknown	CTX-M-55	ISEc9_IS1380_unknown-CTX-M-55	128	1	1	1	0
PDJFT1S3L0405	Broiler faeces	Chicken	Farm	Shandong 1_1	Shandong	k119_208440	PDJFT1S3L0405_l500.fa-k119_208440	ISEc9_IS1380_unknown	CTX-M-55	ISEc9_IS1380_unknown-CTX-M-55	128	1	1	1	0
PDJFT1S3L0406	Broiler faeces	Chicken	Farm	Shandong 1_1	Shandong	k119_195955	PDJFT1S3L0406_l500.fa-k119_195955	ISEc9_IS1380_unknown	CTX-M-55	ISEc9_IS1380_unknown-CTX-M-55	128	1	1	1	0
PDJFT1S3L0507	Broiler faeces	Chicken	Farm	Shandong 1_1	Shandong	k119_315805	PDJFT1S3L0507_l500.fa-k119_315805	ISEc9_IS1380_unknown	CTX-M-55	ISEc9_IS1380_unknown-CTX-M-55	128	1	1	1	0
PDJFT1S4L0313	Broiler faeces	Chicken	Farm	Shandong 1_1	Shandong	k119_22089	PDJFT1S4L0313_l500.fa-k119_22089	ISEc9_IS1380_unknown	CTX-M-55	ISEc9_IS1380_unknown-CTX-M-55	128	1	1	1	0
PDJFT2S3L0101	Broiler faeces	Chicken	Farm	Shandong 1_1	Shandong	k119_100385	PDJFT2S3L0101_l500.fa-k119_100385	ISEc9_IS1380_unknown	CTX-M-55	ISEc9_IS1380_unknown-CTX-M-55	128	1	1	1	0
PDJFT2S3L0202	Broiler faeces	Chicken	Farm	Shandong 1_1	Shandong	k119_25877	PDJFT2S3L0202_l500.fa-k119_25877	ISEc9_IS1380_unknown	CTX-M-55	ISEc9_IS1380_unknown-CTX-M-55	128	1	1	1	0
PDJFT2S3L0507	Broiler faeces	Chicken	Farm	Shandong 1_1	Shandong	k119_82036	PDJFT2S3L0507_l500.fa-k119_82036	ISEc9_IS1380_unknown	CTX-M-55	ISEc9_IS1380_unknown-CTX-M-55	128	1	1	1	0
PDJFT2S3L0508	Broiler faeces	Chicken	Farm	Shandong 1_1	Shandong	k119_219743	PDJFT2S3L0508_l500.fa-k119_219743	ISEc9_IS1380_unknown	CTX-M-55	ISEc9_IS1380_unknown-CTX-M-55	128	1	1	1	0
PDJFT2S3L0610	Broiler faeces	Chicken	Farm	Shandong 1_1	Shandong	k119_1187	PDJFT2S3L0610_l500.fa-k119_1187	ISEc9_IS1380_unknown	CTX-M-55	ISEc9_IS1380_unknown-CTX-M-55	128	1	1	1	0
PDJFT2S4L0313	Broiler faeces	Chicken	Farm	Shandong 1_1	Shandong	k119_32940	PDJFT2S4L0313_l500.fa-k119_32940	ISEc9_IS1380_unknown	CTX-M-55	ISEc9_IS1380_unknown-CTX-M-55	128	1	1	1	0
PDJFT2S4L0515	Broiler faeces	Chicken	Farm	Shandong 1_1	Shandong	k119_16653	PDJFT2S4L0515_l500.fa-k119_16653	ISEc9_IS1380_unknown	CTX-M-55	ISEc9_IS1380_unknown-CTX-M-55	128	1	1	1	0
PDJFT2S4L0819	Broiler faeces	Chicken	Farm	Shandong 1_1	Shandong	k119_56963	PDJFT2S4L0819_l500.fa-k119_56963	ISEc9_IS1380_unknown	CTX-M-55	ISEc9_IS1380_unknown-CTX-M-55	128	1	1	1	0
PDJFT1S3L0609	Broiler faeces	Chicken	Farm	Shandong 1_1	Shandong	k119_338884	PDJFT1S3L0609_l500.fa-k119_338884	ISEc9_IS1380_unknown	CTX-M-55	ISEc9_IS1380_unknown-CTX-M-55	128	1	1	1	0
PDJFT1S4L0616	Broiler faeces	Chicken	Farm	Shandong 1_1	Shandong	k119_111561	PDJFT1S4L0616_l500.fa-k119_111561	ISEc9_IS1380_unknown	CTX-M-55	ISEc9_IS1380_unknown-CTX-M-55	128	1	1	1	0
PDJFT1S4L0819	Broiler faeces	Chicken	Farm	Shandong 1_1	Shandong	k119_10864	PDJFT1S4L0819_l500.fa-k119_10864	ISEc9_IS1380_unknown	CTX-M-55	ISEc9_IS1380_unknown-CTX-M-55	128	1	1	1	0
PDJFT2S3L0304	Broiler faeces	Chicken	Farm	Shandong 1_1	Shandong	k119_23554	PDJFT2S3L0304_l500.fa-k119_23554	ISEc9_IS1380_unknown	CTX-M-55	ISEc9_IS1380_unknown-CTX-M-55	128	1	1	1	0
PDJFT1S4L0212	Broiler faeces	Chicken	Farm	Shandong 1_1	Shandong	k119_243282	PDJFT1S4L0212_l500.fa-k119_243282	ISEc9_IS1380_unknown	CTX-M-55	ISEc9_IS1380_unknown-CTX-M-55	128	1	1	1	0
PDJFT1S3L0101	Broiler faeces	Chicken	Farm	Shandong 1_1	Shandong	k119_151503	PDJFT1S3L0101_l500.fa-k119_151503	ISEc9_IS1380_unknown	CTX-M-55	ISEc9_IS1380_unknown-CTX-M-55	128	1	1	1	0
PDJFT1S4L0515	Broiler faeces	Chicken	Farm	Shandong 1_1	Shandong	k119_8147	PDJFT1S4L0515_l500.fa-k119_8147	ISEc9_IS1380_unknown	CTX-M-55	ISEc9_IS1380_unknown-CTX-M-55	128	1	1	1	0
PDJFL2C6	Broiler faeces	Chicken	Farm	Shandong 1_2	Shandong	k119_71758	PDJFL2C6_l500.fa-k119_71758	ISEc9_IS1380_unknown	CTX-M-55	ISEc9_IS1380_unknown-CTX-M-55	49	1	1	1	0
PDJFL1A1	Broiler faeces	Chicken	Farm	Shandong 1_2	Shandong	k119_26678	PDJFL1A1_l500.fa-k119_26678	ISEc9_IS1380_unknown	CTX-M-55	ISEc9_IS1380_unknown-CTX-M-55	128	1	1	1	0
PDJFL1A2	Broiler faeces	Chicken	Farm	Shandong 1_2	Shandong	k119_68208	PDJFL1A2_l500.fa-k119_68208	ISEc9_IS1380_unknown	CTX-M-55	ISEc9_IS1380_unknown-CTX-M-55	128	1	1	1	0
PDJFL1A3	Broiler faeces	Chicken	Farm	Shandong 1_2	Shandong	k119_75635	PDJFL1A3_l500.fa-k119_75635	ISEc9_IS1380_unknown	CTX-M-55	ISEc9_IS1380_unknown-CTX-M-55	128	1	1	1	0
PDJFL1A4	Broiler faeces	Chicken	Farm	Shandong 1_2	Shandong	k119_37337	PDJFL1A4_l500.fa-k119_37337	ISEc9_IS1380_unknown	CTX-M-55	ISEc9_IS1380_unknown-CTX-M-55	128	1	1	1	0
PDJFL1A5	Broiler faeces	Chicken	Farm	Shandong 1_2	Shandong	k119_181535	PDJFL1A5_l500.fa-k119_181535	ISEc9_IS1380_unknown	CTX-M-55	ISEc9_IS1380_unknown-CTX-M-55	128	1	1	1	0
PDJFL1A6	Broiler faeces	Chicken	Farm	Shandong 1_2	Shandong	k119_83307	PDJFL1A6_l500.fa-k119_83307	ISEc9_IS1380_unknown	CTX-M-55	ISEc9_IS1380_unknown-CTX-M-55	128	1	1	1	0
PDJFL1C1	Broiler faeces	Chicken	Farm	Shandong 1_2	Shandong	k119_103843	PDJFL1C1_l500.fa-k119_103843	ISEc9_IS1380_unknown	CTX-M-55	ISEc9_IS1380_unknown-CTX-M-55	128	1	1	1	0
PDJFL1C2	Broiler faeces	Chicken	Farm	Shandong 1_2	Shandong	k119_241924	PDJFL1C2_l500.fa-k119_241924	ISEc9_IS1380_unknown	CTX-M-55	ISEc9_IS1380_unknown-CTX-M-55	128	1	1	1	0
PDJFL1C3	Broiler faeces	Chicken	Farm	Shandong 1_2	Shandong	k119_73254	PDJFL1C3_l500.fa-k119_73254	ISEc9_IS1380_unknown	CTX-M-55	ISEc9_IS1380_unknown-CTX-M-55	128	1	1	1	0
PDJFL1C4	Broiler faeces	Chicken	Farm	Shandong 1_2	Shandong	k119_71287	PDJFL1C4_l500.fa-k119_71287	ISEc9_IS1380_unknown	CTX-M-55	ISEc9_IS1380_unknown-CTX-M-55	128	1	1	1	0
PDJFL1C5	Broiler faeces	Chicken	Farm	Shandong 1_2	Shandong	k119_57827	PDJFL1C5_l500.fa-k119_57827	ISEc9_IS1380_unknown	CTX-M-55	ISEc9_IS1380_unknown-CTX-M-55	128	1	1	1	0
PDJFL1C6	Broiler faeces	Chicken	Farm	Shandong 1_2	Shandong	k119_68244	PDJFL1C6_l500.fa-k119_68244	ISEc9_IS1380_unknown	CTX-M-55	ISEc9_IS1380_unknown-CTX-M-55	128	1	1	1	0
PDJFL2A2	Broiler faeces	Chicken	Farm	Shandong 1_2	Shandong	k119_370123	PDJFL2A2_l500.fa-k119_370123	ISEc9_IS1380_unknown	CTX-M-55	ISEc9_IS1380_unknown-CTX-M-55	128	1	1	1	0
PDJFL2C3	Broiler faeces	Chicken	Farm	Shandong 1_2	Shandong	k119_317	PDJFL2C3_l500.fa-k119_317	ISEc9_IS1380_unknown	CTX-M-55	ISEc9_IS1380_unknown-CTX-M-55	128	1	1	1	0
PDJFL2C4	Broiler faeces	Chicken	Farm	Shandong 1_2	Shandong	k119_45368	PDJFL2C4_l500.fa-k119_45368	ISEc9_IS1380_unknown	CTX-M-55	ISEc9_IS1380_unknown-CTX-M-55	128	1	1	1	0
PDJFL2C5	Broiler faeces	Chicken	Farm	Shandong 1_2	Shandong	k119_266684	PDJFL2C5_l500.fa-k119_266684	ISEc9_IS1380_unknown	CTX-M-55	ISEc9_IS1380_unknown-CTX-M-55	128	1	1	1	0
PDJFL2C2	Broiler faeces	Chicken	Farm	Shandong 1_2	Shandong	k119_39004	PDJFL2C2_l500.fa-k119_39004	ISEc9_IS1380_unknown	CTX-M-55	ISEc9_IS1380_unknown-CTX-M-55	128	1	1	1	0
SDPD1JTT3.07	Broiler carcass	Chicken	Slaughterhouse	Shandong 2	Shandong	k119_129864	SDPD1JTT3.07_l500.fa-k119_129864	ISEc9_IS1380_unknown	CTX-M-55	ISEc9_IS1380_unknown-CTX-M-55	128	1	1	1	0
SDPD1JTT3.14	Broiler carcass	Chicken	Slaughterhouse	Shandong 2	Shandong	k119_190532	SDPD1JTT3.14_l500.fa-k119_190532	ISEc9_IS1380_unknown	CTX-M-55	ISEc9_IS1380_unknown-CTX-M-55	128	1	1	1	0
SDPD1JTT3.15	Broiler carcass	Chicken	Slaughterhouse	Shandong 2	Shandong	k119_99392	SDPD1JTT3.15_l500.fa-k119_99392	ISEc9_IS1380_unknown	CTX-M-55	ISEc9_IS1380_unknown-CTX-M-55	128	1	1	1	0
SDPD1JFT1.04	Broiler faeces	Chicken	Farm	Shandong 2	Shandong	k119_503356	SDPD1JFT1.04_l500.fa-k119_503356	ISEc9_IS1380_unknown	CTX-M-55	ISEc9_IS1380_unknown-CTX-M-55	46	1	1	1	0
SDPD1JFT1.05	Broiler faeces	Chicken	Farm	Shandong 2	Shandong	k119_155347	SDPD1JFT1.05_l500.fa-k119_155347	ISEc9_IS1380_unknown	CTX-M-55	ISEc9_IS1380_unknown-CTX-M-55	46	1	1	1	0
SDPD1JFT2.12	Broiler faeces	Chicken	Farm	Shandong 2	Shandong	k119_606821	SDPD1JFT2.12_l500.fa-k119_606821	ISEc9_IS1380_unknown	CTX-M-55	ISEc9_IS1380_unknown-CTX-M-55	46	1	1	1	0
SDPD1JFT1.01	Broiler faeces	Chicken	Farm	Shandong 2	Shandong	k119_312896	SDPD1JFT1.01_l500.fa-k119_312896	ISEc9_IS1380_unknown	CTX-M-55	ISEc9_IS1380_unknown-CTX-M-55	128	1	1	1	0
SDPD1JFT1.03	Broiler faeces	Chicken	Farm	Shandong 2	Shandong	k119_231071	SDPD1JFT1.03_l500.fa-k119_231071	ISEc9_IS1380_unknown	CTX-M-55	ISEc9_IS1380_unknown-CTX-M-55	128	1	1	1	0
SDPD1JFT1.09	Broiler faeces	Chicken	Farm	Shandong 2	Shandong	k119_43617	SDPD1JFT1.09_l500.fa-k119_43617	ISEc9_IS1380_unknown	CTX-M-55	ISEc9_IS1380_unknown-CTX-M-55	128	1	1	1	0
SDPD1JFT1.11	Broiler faeces	Chicken	Farm	Shandong 2	Shandong	k119_429547	SDPD1JFT1.11_l500.fa-k119_429547	ISEc9_IS1380_unknown	CTX-M-55	ISEc9_IS1380_unknown-CTX-M-55	128	1	1	1	0
SDPD1JFT2.01	Broiler faeces	Chicken	Farm	Shandong 2	Shandong	k119_802079	SDPD1JFT2.01_l500.fa-k119_802079	ISEc9_IS1380_unknown	CTX-M-55	ISEc9_IS1380_unknown-CTX-M-55	128	1	1	1	0
SDPD1JFT2.02	Broiler faeces	Chicken	Farm	Shandong 2	Shandong	k119_322362	SDPD1JFT2.02_l500.fa-k119_322362	ISEc9_IS1380_unknown	CTX-M-55	ISEc9_IS1380_unknown-CTX-M-55	128	1	1	1	0
SDPD1JFT2.05	Broiler faeces	Chicken	Farm	Shandong 2	Shandong	k119_708552	SDPD1JFT2.05_l500.fa-k119_708552	ISEc9_IS1380_unknown	CTX-M-55	ISEc9_IS1380_unknown-CTX-M-55	128	1	1	1	0
SDPD1JFT2.08	Broiler faeces	Chicken	Farm	Shandong 2	Shandong	k119_479805	SDPD1JFT2.08_l500.fa-k119_479805	ISEc9_IS1380_unknown	CTX-M-55	ISEc9_IS1380_unknown-CTX-M-55	128	1	1	1	0
SDPD1JFT2.13	Broiler faeces	Chicken	Farm	Shandong 2	Shandong	k119_330442	SDPD1JFT2.13_l500.fa-k119_330442	ISEc9_IS1380_unknown	CTX-M-55	ISEc9_IS1380_unknown-CTX-M-55	128	1	1	1	0
SDPD1JFT1.06	Broiler faeces	Chicken	Farm	Shandong 2	Shandong	k119_307396	SDPD1JFT1.06_l500.fa-k119_307396	ISEc9_IS1380_unknown	CTX-M-55	ISEc9_IS1380_unknown-CTX-M-55	128	1	1	1	0
SDPD1JFT1.07	Broiler faeces	Chicken	Farm	Shandong 2	Shandong	k119_336723	SDPD1JFT1.07_l500.fa-k119_336723	ISEc9_IS1380_unknown	CTX-M-55	ISEc9_IS1380_unknown-CTX-M-55	128	1	1	1	0
SDPD1YMT1.03	Broiler Feather	Chicken	Farm	Shandong 2	Shandong	k119_711870	SDPD1YMT1.03_l500.fa-k119_711870	ISEc9_IS1380_unknown	CTX-M-55	ISEc9_IS1380_unknown-CTX-M-55	46	1	1	1	0
SDPD1YMT2.03	Broiler Feather	Chicken	Farm	Shandong 2	Shandong	k119_274486	SDPD1YMT2.03_l500.fa-k119_274486	ISEc9_IS1380_unknown	CTX-M-55	ISEc9_IS1380_unknown-CTX-M-55	49	1	1	1	0
SDPD1YMT2.05	Broiler Feather	Chicken	Farm	Shandong 2	Shandong	k119_554903	SDPD1YMT2.05_l500.fa-k119_554903	ISEc9_IS1380_unknown	CTX-M-55	ISEc9_IS1380_unknown-CTX-M-55	128	1	1	1	0
SDPD1YMT2.04	Broiler Feather	Chicken	Farm	Shandong 2	Shandong	k119_604339	SDPD1YMT2.04_l500.fa-k119_604339	ISEc9_IS1380_unknown	CTX-M-55	ISEc9_IS1380_unknown-CTX-M-55	128	1	1	1	0
SDPD3JFT1-13	Broiler faeces	Chicken	Farm	Shandong 3	Shandong	k119_41103	SDPD3JFT1-13_l500.fa-k119_41103	ISEc9_IS1380_unknown	CTX-M-55	ISEc9_IS1380_unknown-CTX-M-55	46	1	1	1	0
SDPD3JFT2-02	Broiler faeces	Chicken	Farm	Shandong 3	Shandong	k119_27792	SDPD3JFT2-02_l500.fa-k119_27792	ISEc9_IS1380_unknown	CTX-M-55	ISEc9_IS1380_unknown-CTX-M-55	46	1	1	1	0
SDPD3JFT2-12	Broiler faeces	Chicken	Farm	Shandong 3	Shandong	k119_92568	SDPD3JFT2-12_l500.fa-k119_92568	ISEc9_IS1380_unknown	CTX-M-55	ISEc9_IS1380_unknown-CTX-M-55	49	1	1	1	0
SDPD3JFT1-03	Broiler faeces	Chicken	Farm	Shandong 3	Shandong	k119_192835	SDPD3JFT1-03_l500.fa-k119_192835	ISEc9_IS1380_unknown	CTX-M-55	ISEc9_IS1380_unknown-CTX-M-55	128	1	1	1	0
SDPD3JFT2-01	Broiler faeces	Chicken	Farm	Shandong 3	Shandong	k119_404	SDPD3JFT2-01_l500.fa-k119_404	ISEc9_IS1380_unknown	CTX-M-55	ISEc9_IS1380_unknown-CTX-M-55	128	1	1	1	0
SDPD3JFT1-19	Broiler faeces	Chicken	Farm	Shandong 3	Shandong	k119_77812	SDPD3JFT1-19_l500.fa-k119_77812	ISEc9_IS1380_unknown	CTX-M-55	ISEc9_IS1380_unknown-CTX-M-55	128	1	1	1	0
SDPD3JFT2-11	Broiler faeces	Chicken	Farm	Shandong 3	Shandong	k119_233314	SDPD3JFT2-11_l500.fa-k119_233314	ISEc9_IS1380_unknown	CTX-M-55	ISEc9_IS1380_unknown-CTX-M-55	128	1	1	1	0
SDPD3JFT1-20	Broiler faeces	Chicken	Farm	Shandong 3	Shandong	k119_112239	SDPD3JFT1-20_l500.fa-k119_112239	ISEc9_IS1380_unknown	CTX-M-55	ISEc9_IS1380_unknown-CTX-M-55	128	1	1	1	0
SDPD3TWT3-01	Wastewater	Environment	Slaughterhouse	Shandong 3	Shandong	k119_577888	SDPD3TWT3-01_l500.fa-k119_577888	ISEc9_IS1380_unknown	CTX-M-55	ISEc9_IS1380_unknown-CTX-M-55	128	1	1	1	0
SDPD4JFT2-11	Broiler faeces	Chicken	Farm	Shandong 4	Shandong	k119_836152	SDPD4JFT2-11_l500.fa-k119_836152	ISEc9_IS1380_unknown	CTX-M-55	ISEc9_IS1380_unknown-CTX-M-55	46	1	1	1	0
SDPD4JFT1-15	Broiler faeces	Chicken	Farm	Shandong 4	Shandong	k119_688351	SDPD4JFT1-15_l500.fa-k119_688351	ISEc9_IS1380_unknown	CTX-M-55	ISEc9_IS1380_unknown-CTX-M-55	46	1	1	1	0
SDPD4JFT1-01	Broiler faeces	Chicken	Farm	Shandong 4	Shandong	k119_173517	SDPD4JFT1-01_l500.fa-k119_173517	ISEc9_IS1380_unknown	CTX-M-55	ISEc9_IS1380_unknown-CTX-M-55	128	1	1	1	0
SDPD4JFT1-05	Broiler faeces	Chicken	Farm	Shandong 4	Shandong	k119_295390	SDPD4JFT1-05_l500.fa-k119_295390	ISEc9_IS1380_unknown	CTX-M-55	ISEc9_IS1380_unknown-CTX-M-55	128	1	1	1	0
SDPD4JFT1-08	Broiler faeces	Chicken	Farm	Shandong 4	Shandong	k119_456279	SDPD4JFT1-08_l500.fa-k119_456279	ISEc9_IS1380_unknown	CTX-M-55	ISEc9_IS1380_unknown-CTX-M-55	128	1	1	1	0
SDPD4JFT1-13	Broiler faeces	Chicken	Farm	Shandong 4	Shandong	k119_738605	SDPD4JFT1-13_l500.fa-k119_738605	ISEc9_IS1380_unknown	CTX-M-55	ISEc9_IS1380_unknown-CTX-M-55	128	1	1	1	0
SDPD4JFT2-01	Broiler faeces	Chicken	Farm	Shandong 4	Shandong	k119_442640	SDPD4JFT2-01_l500.fa-k119_442640	ISEc9_IS1380_unknown	CTX-M-55	ISEc9_IS1380_unknown-CTX-M-55	128	1	1	1	0
SDPD4JFT2-03	Broiler faeces	Chicken	Farm	Shandong 4	Shandong	k119_535645	SDPD4JFT2-03_l500.fa-k119_535645	ISEc9_IS1380_unknown	CTX-M-55	ISEc9_IS1380_unknown-CTX-M-55	128	1	1	1	0
SDPD4JFT2-07	Broiler faeces	Chicken	Farm	Shandong 4	Shandong	k119_458834	SDPD4JFT2-07_l500.fa-k119_458834	ISEc9_IS1380_unknown	CTX-M-55	ISEc9_IS1380_unknown-CTX-M-55	128	1	1	1	0
SDPD4JFT2-17	Broiler faeces	Chicken	Farm	Shandong 4	Shandong	k119_726510	SDPD4JFT2-17_l500.fa-k119_726510	ISEc9_IS1380_unknown	CTX-M-55	ISEc9_IS1380_unknown-CTX-M-55	128	1	1	1	0
SDPD4JFT2-09	Broiler faeces	Chicken	Farm	Shandong 4	Shandong	k119_108960	SDPD4JFT2-09_l500.fa-k119_108960	ISEc9_IS1380_unknown	CTX-M-55	ISEc9_IS1380_unknown-CTX-M-55	128	1	1	1	0
SDPD4YMT2-03	Broiler Feather	Chicken	Farm	Shandong 4	Shandong	k119_398182	SDPD4YMT2-03_l500.fa-k119_398182	ISEc9_IS1380_unknown	CTX-M-55	ISEc9_IS1380_unknown-CTX-M-55	46	1	1	1	0
SDPD4YMT1-02	Broiler Feather	Chicken	Farm	Shandong 4	Shandong	k119_812985	SDPD4YMT1-02_l500.fa-k119_812985	ISEc9_IS1380_unknown	CTX-M-55	ISEc9_IS1380_unknown-CTX-M-55	46	1	1	1	0
SDPD4YMT1-03	Broiler Feather	Chicken	Farm	Shandong 4	Shandong	k119_872060	SDPD4YMT1-03_l500.fa-k119_872060	ISEc9_IS1380_unknown	CTX-M-55	ISEc9_IS1380_unknown-CTX-M-55	128	1	1	1	0
SDPD4YMT2-01	Broiler Feather	Chicken	Farm	Shandong 4	Shandong	k119_1022595	SDPD4YMT2-01_l500.fa-k119_1022595	ISEc9_IS1380_unknown	CTX-M-55	ISEc9_IS1380_unknown-CTX-M-55	128	1	1	1	0
SDPD4YMT2-04	Broiler Feather	Chicken	Farm	Shandong 4	Shandong	k119_1505723	SDPD4YMT2-04_l500.fa-k119_1505723	ISEc9_IS1380_unknown	CTX-M-55	ISEc9_IS1380_unknown-CTX-M-55	128	1	1	1	0
LNPCJFT1_03	Broiler faeces	Chicken	Farm	Liaoning 1	Liaoning	k119_307722	LNPCJFT1_03_l500.fa-k119_307722	ISEnca1_IS1380_unknown	APH(2'')-Ie	ISEnca1_IS1380_unknown-APH(2'')-Ie	530	1	1	1	0
LNPCJFT2_01	Broiler faeces	Chicken	Farm	Liaoning 1	Liaoning	k119_170199	LNPCJFT2_01_l500.fa-k119_170199	ISEnca1_IS1380_unknown	APH(2'')-Ie	ISEnca1_IS1380_unknown-APH(2'')-Ie	530	1	1	1	0
SDPD4JFT1-05	Broiler faeces	Chicken	Farm	Shandong 4	Shandong	k119_632870	SDPD4JFT1-05_l500.fa-k119_632870	ISEnca1_IS1380_unknown	APH(2'')-Ie	ISEnca1_IS1380_unknown-APH(2'')-Ie	530	1	1	1	0
SDPD4JFT1-13	Broiler faeces	Chicken	Farm	Shandong 4	Shandong	k119_463977	SDPD4JFT1-13_l500.fa-k119_463977	ISEnca1_IS1380_unknown	APH(2'')-Ie	ISEnca1_IS1380_unknown-APH(2'')-Ie	530	1	1	1	0
SDPD4JFT1-15	Broiler faeces	Chicken	Farm	Shandong 4	Shandong	k119_284036	SDPD4JFT1-15_l500.fa-k119_284036	ISEnca1_IS1380_unknown	APH(2'')-Ie	ISEnca1_IS1380_unknown-APH(2'')-Ie	530	1	1	1	0
SDPD4JFT1-18	Broiler faeces	Chicken	Farm	Shandong 4	Shandong	k119_497612	SDPD4JFT1-18_l500.fa-k119_497612	ISEnca1_IS1380_unknown	APH(2'')-Ie	ISEnca1_IS1380_unknown-APH(2'')-Ie	530	1	1	1	0
SDPD4JFT2-01	Broiler faeces	Chicken	Farm	Shandong 4	Shandong	k119_80860	SDPD4JFT2-01_l500.fa-k119_80860	ISEnca1_IS1380_unknown	APH(2'')-Ie	ISEnca1_IS1380_unknown-APH(2'')-Ie	530	1	1	1	0
SDPD4JFT2-05	Broiler faeces	Chicken	Farm	Shandong 4	Shandong	k119_213376	SDPD4JFT2-05_l500.fa-k119_213376	ISEnca1_IS1380_unknown	APH(2'')-Ie	ISEnca1_IS1380_unknown-APH(2'')-Ie	530	1	1	1	0
SDPD4JFT2-13	Broiler faeces	Chicken	Farm	Shandong 4	Shandong	k119_634422	SDPD4JFT2-13_l500.fa-k119_634422	ISEnca1_IS1380_unknown	APH(2'')-Ie	ISEnca1_IS1380_unknown-APH(2'')-Ie	530	1	1	1	0
SDPD4JFT1-17	Broiler faeces	Chicken	Farm	Shandong 4	Shandong	k119_636303	SDPD4JFT1-17_l500.fa-k119_636303	ISEnca1_IS1380_unknown	APH(2'')-Ie	ISEnca1_IS1380_unknown-APH(2'')-Ie	530	1	1	1	0
PDJFT1S3L0101	Broiler faeces	Chicken	Farm	Shandong 1_1	Shandong	k119_91336	PDJFT1S3L0101_l500.fa-k119_91336	ISKpn26_IS5_IS5	SAT-1	ISKpn26_IS5_IS5-SAT-1	3869	0	1	1	1
PDJFT1S3L0202	Broiler faeces	Chicken	Farm	Shandong 1_1	Shandong	k119_425393	PDJFT1S3L0202_l500.fa-k119_425393	ISKpn26_IS5_IS5	SAT-1	ISKpn26_IS5_IS5-SAT-1	3869	0	1	1	1
PDJFT1S3L0303	Broiler faeces	Chicken	Farm	Shandong 1_1	Shandong	k119_11089	PDJFT1S3L0303_l500.fa-k119_11089	ISKpn26_IS5_IS5	SAT-1	ISKpn26_IS5_IS5-SAT-1	3869	0	1	1	1
PDJFT1S3L0507	Broiler faeces	Chicken	Farm	Shandong 1_1	Shandong	k119_36389	PDJFT1S3L0507_l500.fa-k119_36389	ISKpn26_IS5_IS5	SAT-1	ISKpn26_IS5_IS5-SAT-1	3869	0	1	1	1
PDJFT1S3L0609	Broiler faeces	Chicken	Farm	Shandong 1_1	Shandong	k119_27952	PDJFT1S3L0609_l500.fa-k119_27952	ISKpn26_IS5_IS5	SAT-1	ISKpn26_IS5_IS5-SAT-1	3869	0	1	1	1
PDJFT1S4L0819	Broiler faeces	Chicken	Farm	Shandong 1_1	Shandong	k119_88301	PDJFT1S4L0819_l500.fa-k119_88301	ISKpn26_IS5_IS5	SAT-1	ISKpn26_IS5_IS5-SAT-1	3869	0	1	1	1
PDJFT1S3L0508	Broiler faeces	Chicken	Farm	Shandong 1_1	Shandong	k119_233726	PDJFT1S3L0508_l500.fa-k119_233726	ISKpn26_IS5_IS5	SAT-1	ISKpn26_IS5_IS5-SAT-1	3869	0	1	1	1
PDJFT1S3L0610	Broiler faeces	Chicken	Farm	Shandong 1_1	Shandong	k119_118294	PDJFT1S3L0610_l500.fa-k119_118294	ISKpn26_IS5_IS5	SAT-1	ISKpn26_IS5_IS5-SAT-1	3869	0	1	1	1
SDPD4HCT2-03	Barn Floor	Environment	Farm	Shandong 4	Shandong	k119_492103	SDPD4HCT2-03_l500.fa-k119_492103	ISLac1_IS1182_unknown	ErmC	ISLac1_IS1182_unknown-ErmC	9	1	1	1	0
SDPD4JFT2-01	Broiler faeces	Chicken	Farm	Shandong 4	Shandong	k119_359620	SDPD4JFT2-01_l500.fa-k119_359620	ISLac1_IS1182_unknown	ErmC	ISLac1_IS1182_unknown-ErmC	1415	1	1	1	0
HAYS1JFT2-4	Broiler faeces	Chicken	Farm	Henan 1	Henan	k119_17359	HAYS1JFT2-4_l500.fa-k119_17359	ISLgar4_IS6_unknown	ErmC	ISLgar4_IS6_unknown-ErmC	74	1	1	1	0
PDJFL2C3	Broiler faeces	Chicken	Farm	Shandong 1_2	Shandong	k119_26682	PDJFL2C3_l500.fa-k119_26682	ISLgar4_IS6_unknown	ErmC	ISLgar4_IS6_unknown-ErmC	74	1	1	1	0
SDPD1JFT2.01	Broiler faeces	Chicken	Farm	Shandong 2	Shandong	k119_57728	SDPD1JFT2.01_l500.fa-k119_57728	ISLgar4_IS6_unknown	ErmC	ISLgar4_IS6_unknown-ErmC	74	1	1	1	0
SDPD1JFT1.11	Broiler faeces	Chicken	Farm	Shandong 2	Shandong	k119_766550	SDPD1JFT1.11_l500.fa-k119_766550	ISLmo9_IS3_IS150	ANT(9)-Ia	ISLmo9_IS3_IS150-ANT(9)-Ia	101	0	1	1	1
SDPD1JFT1.15	Broiler faeces	Chicken	Farm	Shandong 2	Shandong	k119_142813	SDPD1JFT1.15_l500.fa-k119_142813	ISLmo9_IS3_IS150	ANT(9)-Ia	ISLmo9_IS3_IS150-ANT(9)-Ia	101	0	1	1	1
SDPD1JFT2.14	Broiler faeces	Chicken	Farm	Shandong 2	Shandong	k119_904675	SDPD1JFT2.14_l500.fa-k119_904675	ISLmo9_IS3_IS150	ANT(9)-Ia	ISLmo9_IS3_IS150-ANT(9)-Ia	101	0	1	1	1
SDPD1JFT1.07	Broiler faeces	Chicken	Farm	Shandong 2	Shandong	k119_68755	SDPD1JFT1.07_l500.fa-k119_68755	ISLmo9_IS3_IS150	ANT(9)-Ia	ISLmo9_IS3_IS150-ANT(9)-Ia	101	0	1	1	1
SDPD1JFT1.14	Broiler faeces	Chicken	Farm	Shandong 2	Shandong	k119_303931	SDPD1JFT1.14_l500.fa-k119_303931	ISLmo9_IS3_IS150	ANT(9)-Ia	ISLmo9_IS3_IS150-ANT(9)-Ia	101	0	1	1	1
HAYS1JFT1-3	Broiler faeces	Chicken	Farm	Henan 1	Henan	k119_134654	HAYS1JFT1-3_l500.fa-k119_134654	ISPa12_IS4_ISH8	PER-1	ISPa12_IS4_ISH8-PER-1	14	0	1	1	1
LNPCJFT1_03	Broiler faeces	Chicken	Farm	Liaoning 1	Liaoning	k119_80062	LNPCJFT1_03_l500.fa-k119_80062	ISPa12_IS4_ISH8	PER-1	ISPa12_IS4_ISH8-PER-1	14	0	1	1	1
LNPCJFT1_17	Broiler faeces	Chicken	Farm	Liaoning 1	Liaoning	k119_64552	LNPCJFT1_17_l500.fa-k119_64552	ISPa12_IS4_ISH8	PER-1	ISPa12_IS4_ISH8-PER-1	14	0	1	1	1
LNPCJFT1_18	Broiler faeces	Chicken	Farm	Liaoning 1	Liaoning	k119_38755	LNPCJFT1_18_l500.fa-k119_38755	ISPa12_IS4_ISH8	PER-1	ISPa12_IS4_ISH8-PER-1	14	0	1	1	1
HAYS1JFT1-3	Broiler faeces	Chicken	Farm	Henan 1	Henan	k119_134654	HAYS1JFT1-3_l500.fa-k119_134654	ISPa13_IS4_ISH8	PER-1	ISPa13_IS4_ISH8-PER-1	463	0	1	1	1
LNPCJFT1_03	Broiler faeces	Chicken	Farm	Liaoning 1	Liaoning	k119_80062	LNPCJFT1_03_l500.fa-k119_80062	ISPa13_IS4_ISH8	PER-1	ISPa13_IS4_ISH8-PER-1	463	0	1	1	1
LNPCJFT1_17	Broiler faeces	Chicken	Farm	Liaoning 1	Liaoning	k119_64552	LNPCJFT1_17_l500.fa-k119_64552	ISPa13_IS4_ISH8	PER-1	ISPa13_IS4_ISH8-PER-1	463	0	1	1	1
SDPD4JFT1-01	Broiler faeces	Chicken	Farm	Shandong 4	Shandong	k119_196951	SDPD4JFT1-01_l500.fa-k119_196951	ISPa25_IS110_IS1111	cmlA6	ISPa25_IS110_IS1111-cmlA6	1073	1	1	1	0
SDPD4JFT1-18	Broiler faeces	Chicken	Farm	Shandong 4	Shandong	k119_387645	SDPD4JFT1-18_l500.fa-k119_387645	ISPa25_IS110_IS1111	cmlA6	ISPa25_IS110_IS1111-cmlA6	1073	1	1	1	0
LNPCDMT2_01	Barn Floor	Environment	Farm	Liaoning 1	Liaoning	k119_180324	LNPCDMT2_01_l500.fa-k119_180324	ISPye15_IS701_unknown	mphF	ISPye15_IS701_unknown-mphF	3983	0	1	1	1
LNTPTRT1_01	Soil	Environment	Farm	Liaoning 2	Liaoning	k119_754547	LNTPTRT1_01_l500.fa-k119_754547	ISPye15_IS701_unknown	mphF	ISPye15_IS701_unknown-mphF	3983	0	1	1	1
LNTPDMT1_03	Barn Floor	Environment	Farm	Liaoning 2	Liaoning	k119_1031822	LNTPDMT1_03_l500.fa-k119_1031822	ISSau9_IS21_unknown	lsaB	ISSau9_IS21_unknown-lsaB	165	0	1	1	1
SDPD4HCT1-01	Barn Floor	Environment	Farm	Shandong 4	Shandong	k119_114078	SDPD4HCT1-01_l500.fa-k119_114078	ISSau9_IS21_unknown	lsaB	ISSau9_IS21_unknown-lsaB	481	0	1	1	1
SDPD4JFT1-15	Broiler faeces	Chicken	Farm	Shandong 4	Shandong	k119_728040	SDPD4JFT1-15_l500.fa-k119_728040	ISSau9_IS21_unknown	lsaB	ISSau9_IS21_unknown-lsaB	165	0	1	1	1
HAYS2JTT3-14	Broiler carcass	Chicken	Slaughterhouse	Henan 2	Henan	k119_757652	HAYS2JTT3-14_l500.fa-k119_757652	ISVsa3_IS91_unknown	APH(3')-Ib	ISVsa3_IS91_unknown-APH(3')-Ib	465	1	1	1	0
HAYS2TMT3-1	Processing Line	Environment	Slaughterhouse	Henan 2	Henan	k119_1119680	HAYS2TMT3-1_l500.fa-k119_1119680	ISVsa3_IS91_unknown	APH(3')-Ib	ISVsa3_IS91_unknown-APH(3')-Ib	465	1	1	1	0
HAYS2TWT3-3	Wastewater	Environment	Slaughterhouse	Henan 2	Henan	k119_430161	HAYS2TWT3-3_l500.fa-k119_430161	ISVsa3_IS91_unknown	APH(3')-Ib	ISVsa3_IS91_unknown-APH(3')-Ib	465	1	1	1	0
LNLDDMT1-01	Barn Floor	Environment	Farm	Liaoning 3	Liaoning	k119_376174	LNLDDMT1-01_l500.fa-k119_376174	ISVsa3_IS91_unknown	APH(3')-Ib	ISVsa3_IS91_unknown-APH(3')-Ib	465	1	1	1	0
LNLDDMT1-03	Barn Floor	Environment	Farm	Liaoning 3	Liaoning	k119_173856	LNLDDMT1-03_l500.fa-k119_173856	ISVsa3_IS91_unknown	APH(3')-Ib	ISVsa3_IS91_unknown-APH(3')-Ib	465	1	1	1	0
LNLDDMT2-03	Barn Floor	Environment	Farm	Liaoning 3	Liaoning	k119_533199	LNLDDMT2-03_l500.fa-k119_533199	ISVsa3_IS91_unknown	APH(3')-Ib	ISVsa3_IS91_unknown-APH(3')-Ib	465	1	1	1	0
HAYS1JFT1-3	Broiler faeces	Chicken	Farm	Henan 1	Henan	k119_130554	HAYS1JFT1-3_l500.fa-k119_130554	ISVsa3_IS91_unknown	CfxA2	ISVsa3_IS91_unknown-CfxA2	681	0	1	1	1
HAYS1JFT1-7	Broiler faeces	Chicken	Farm	Henan 1	Henan	k119_102220	HAYS1JFT1-7_l500.fa-k119_102220	ISVsa3_IS91_unknown	CfxA2	ISVsa3_IS91_unknown-CfxA2	681	0	1	1	1
HAYS1JFT1-8	Broiler faeces	Chicken	Farm	Henan 1	Henan	k119_305253	HAYS1JFT1-8_l500.fa-k119_305253	ISVsa3_IS91_unknown	CfxA2	ISVsa3_IS91_unknown-CfxA2	681	0	1	1	1
HAYS1JFT2-5	Broiler faeces	Chicken	Farm	Henan 1	Henan	k119_456175	HAYS1JFT2-5_l500.fa-k119_456175	ISVsa3_IS91_unknown	CfxA2	ISVsa3_IS91_unknown-CfxA2	681	0	1	1	1
HAYS1JFT1-5	Broiler faeces	Chicken	Farm	Henan 1	Henan	k119_175683	HAYS1JFT1-5_l500.fa-k119_175683	ISVsa3_IS91_unknown	CfxA2	ISVsa3_IS91_unknown-CfxA2	681	0	1	1	1
HAYS3HCT2-1	Barn Floor	Environment	Farm	Henan 3	Henan	k119_1026498	HAYS3HCT2-1_l500.fa-k119_1026498	ISVsa3_IS91_unknown	CfxA2	ISVsa3_IS91_unknown-CfxA2	57	0	1	1	1
HAYS3HCT2-2	Barn Floor	Environment	Farm	Henan 3	Henan	k119_370900	HAYS3HCT2-2_l500.fa-k119_370900	ISVsa3_IS91_unknown	CfxA2	ISVsa3_IS91_unknown-CfxA2	57	0	1	1	1
HAYS3JFT2-7	Broiler faeces	Chicken	Farm	Henan 3	Henan	k119_103999	HAYS3JFT2-7_l500.fa-k119_103999	ISVsa3_IS91_unknown	CfxA2	ISVsa3_IS91_unknown-CfxA2	57	0	1	1	1
HAYS3JFT1-7	Broiler faeces	Chicken	Farm	Henan 3	Henan	k119_108238	HAYS3JFT1-7_l500.fa-k119_108238	ISVsa3_IS91_unknown	CfxA2	ISVsa3_IS91_unknown-CfxA2	57	0	1	1	1
HAYS3JFT2-1	Broiler faeces	Chicken	Farm	Henan 3	Henan	k119_144086	HAYS3JFT2-1_l500.fa-k119_144086	ISVsa3_IS91_unknown	CfxA2	ISVsa3_IS91_unknown-CfxA2	57	0	1	1	1
HAYS3JFT2-11	Broiler faeces	Chicken	Farm	Henan 3	Henan	k119_282812	HAYS3JFT2-11_l500.fa-k119_282812	ISVsa3_IS91_unknown	CfxA2	ISVsa3_IS91_unknown-CfxA2	57	0	1	1	1
HAYS3JFT2-14	Broiler faeces	Chicken	Farm	Henan 3	Henan	k119_5661	HAYS3JFT2-14_l500.fa-k119_5661	ISVsa3_IS91_unknown	CfxA2	ISVsa3_IS91_unknown-CfxA2	57	0	1	1	1
HAYS3JFT2-2	Broiler faeces	Chicken	Farm	Henan 3	Henan	k119_100009	HAYS3JFT2-2_l500.fa-k119_100009	ISVsa3_IS91_unknown	CfxA2	ISVsa3_IS91_unknown-CfxA2	57	0	1	1	1
HAYS3JFT2-3	Broiler faeces	Chicken	Farm	Henan 3	Henan	k119_134573	HAYS3JFT2-3_l500.fa-k119_134573	ISVsa3_IS91_unknown	CfxA2	ISVsa3_IS91_unknown-CfxA2	57	0	1	1	1
HAYS3JFT2-8	Broiler faeces	Chicken	Farm	Henan 3	Henan	k119_263307	HAYS3JFT2-8_l500.fa-k119_263307	ISVsa3_IS91_unknown	CfxA2	ISVsa3_IS91_unknown-CfxA2	57	0	1	1	1
HAYS3YMT2-1	Broiler Feather	Chicken	Farm	Henan 3	Henan	k119_619535	HAYS3YMT2-1_l500.fa-k119_619535	ISVsa3_IS91_unknown	CfxA2	ISVsa3_IS91_unknown-CfxA2	57	0	1	1	1
HAYS3YMT2-3	Broiler Feather	Chicken	Farm	Henan 3	Henan	k119_1044155	HAYS3YMT2-3_l500.fa-k119_1044155	ISVsa3_IS91_unknown	CfxA2	ISVsa3_IS91_unknown-CfxA2	57	0	1	1	1
HAYS3YMT2-4	Broiler Feather	Chicken	Farm	Henan 3	Henan	k119_252523	HAYS3YMT2-4_l500.fa-k119_252523	ISVsa3_IS91_unknown	CfxA2	ISVsa3_IS91_unknown-CfxA2	57	0	1	1	1
HAYS3YMT2-5	Broiler Feather	Chicken	Farm	Henan 3	Henan	k119_80024	HAYS3YMT2-5_l500.fa-k119_80024	ISVsa3_IS91_unknown	CfxA2	ISVsa3_IS91_unknown-CfxA2	57	0	1	1	1
HAYS3YMT2-2	Broiler Feather	Chicken	Farm	Henan 3	Henan	k119_54840	HAYS3YMT2-2_l500.fa-k119_54840	ISVsa3_IS91_unknown	CfxA2	ISVsa3_IS91_unknown-CfxA2	57	0	1	1	1
HAYS3YMT1-02	Broiler Feather	Chicken	Farm	Henan 3	Henan	k119_65466	HAYS3YMT1-02_l500.fa-k119_65466	ISVsa3_IS91_unknown	CfxA2	ISVsa3_IS91_unknown-CfxA2	57	0	1	1	1
HAYS3YMT1-01	Broiler Feather	Chicken	Farm	Henan 3	Henan	k119_617580	HAYS3YMT1-01_l500.fa-k119_617580	ISVsa3_IS91_unknown	CfxA2	ISVsa3_IS91_unknown-CfxA2	57	0	1	1	1
LNPCJFT1_03	Broiler faeces	Chicken	Farm	Liaoning 1	Liaoning	k119_89936	LNPCJFT1_03_l500.fa-k119_89936	ISVsa3_IS91_unknown	CfxA2	ISVsa3_IS91_unknown-CfxA2	681	0	1	1	1
LNTPJFT1_06	Broiler faeces	Chicken	Farm	Liaoning 2	Liaoning	k119_124021	LNTPJFT1_06_l500.fa-k119_124021	ISVsa3_IS91_unknown	CfxA2	ISVsa3_IS91_unknown-CfxA2	57	0	1	1	1
SDPD4YMT2-01	Broiler Feather	Chicken	Farm	Shandong 4	Shandong	k119_209716	SDPD4YMT2-01_l500.fa-k119_209716	ISVsa3_IS91_unknown	CfxA2	ISVsa3_IS91_unknown-CfxA2	57	0	1	1	1
SDPD4YMT2-02	Broiler Feather	Chicken	Farm	Shandong 4	Shandong	k119_246839	SDPD4YMT2-02_l500.fa-k119_246839	ISVsa3_IS91_unknown	CfxA2	ISVsa3_IS91_unknown-CfxA2	57	0	1	1	1
SDPD4YMT2-04	Broiler Feather	Chicken	Farm	Shandong 4	Shandong	k119_422317	SDPD4YMT2-04_l500.fa-k119_422317	ISVsa3_IS91_unknown	CfxA2	ISVsa3_IS91_unknown-CfxA2	57	0	1	1	1
HAYS1JFT2-1	Broiler faeces	Chicken	Farm	Henan 1	Henan	k119_180185	HAYS1JFT2-1_l500.fa-k119_180185	IS102_IS5_IS903	APH(4)-Ia	IS102_IS5_IS903-APH(4)-Ia	4781	0	1	1	0
HAYS1JFT1-3	Broiler faeces	Chicken	Farm	Henan 1	Henan	k119_129431	HAYS1JFT1-3_l500.fa-k119_129431	IS102_IS5_IS903	APH(4)-Ia	IS102_IS5_IS903-APH(4)-Ia	4781	0	1	1	0
HAYS2JFT2-11	Broiler faeces	Chicken	Farm	Henan 2	Henan	k119_20203	HAYS2JFT2-11_l500.fa-k119_20203	IS102_IS5_IS903	APH(4)-Ia	IS102_IS5_IS903-APH(4)-Ia	4781	0	1	1	0
HAYS2JFT2-6	Broiler faeces	Chicken	Farm	Henan 2	Henan	k119_9914	HAYS2JFT2-6_l500.fa-k119_9914	IS102_IS5_IS903	APH(4)-Ia	IS102_IS5_IS903-APH(4)-Ia	4781	0	1	1	0
HAYS2JFT2-14	Broiler faeces	Chicken	Farm	Henan 2	Henan	k119_510355	HAYS2JFT2-14_l500.fa-k119_510355	IS102_IS5_IS903	APH(4)-Ia	IS102_IS5_IS903-APH(4)-Ia	4781	0	1	1	0
HAYS2JFT1-12	Broiler faeces	Chicken	Farm	Henan 2	Henan	k119_116602	HAYS2JFT1-12_l500.fa-k119_116602	IS102_IS5_IS903	APH(4)-Ia	IS102_IS5_IS903-APH(4)-Ia	4781	0	1	1	0
HAYS2YMT2-3	Broiler Feather	Chicken	Farm	Henan 2	Henan	k119_1138300	HAYS2YMT2-3_l500.fa-k119_1138300	IS102_IS5_IS903	APH(4)-Ia	IS102_IS5_IS903-APH(4)-Ia	4781	0	1	1	0
HAYS3JFT1-13	Broiler faeces	Chicken	Farm	Henan 3	Henan	k119_29585	HAYS3JFT1-13_l500.fa-k119_29585	IS102_IS5_IS903	APH(4)-Ia	IS102_IS5_IS903-APH(4)-Ia	4781	0	1	1	0
HAYS3JFT1-15	Broiler faeces	Chicken	Farm	Henan 3	Henan	k119_258852	HAYS3JFT1-15_l500.fa-k119_258852	IS102_IS5_IS903	APH(4)-Ia	IS102_IS5_IS903-APH(4)-Ia	4781	0	1	1	0
HAYS3JFT1-7	Broiler faeces	Chicken	Farm	Henan 3	Henan	k119_160841	HAYS3JFT1-7_l500.fa-k119_160841	IS102_IS5_IS903	APH(4)-Ia	IS102_IS5_IS903-APH(4)-Ia	4781	0	1	1	0
HAYS3JFT1-8	Broiler faeces	Chicken	Farm	Henan 3	Henan	k119_1866930	HAYS3JFT1-8_l500.fa-k119_1866930	IS102_IS5_IS903	APH(4)-Ia	IS102_IS5_IS903-APH(4)-Ia	4781	0	1	1	0
LNPCJFT1_04	Broiler faeces	Chicken	Farm	Liaoning 1	Liaoning	k119_7417	LNPCJFT1_04_l500.fa-k119_7417	IS102_IS5_IS903	APH(4)-Ia	IS102_IS5_IS903-APH(4)-Ia	4781	0	1	1	0
LNPCJFT1_10	Broiler faeces	Chicken	Farm	Liaoning 1	Liaoning	k119_34161	LNPCJFT1_10_l500.fa-k119_34161	IS102_IS5_IS903	APH(4)-Ia	IS102_IS5_IS903-APH(4)-Ia	4781	0	1	1	0
LNLDJFT1-05	Broiler faeces	Chicken	Farm	Liaoning 3	Liaoning	k119_183928	LNLDJFT1-05_l500.fa-k119_183928	IS102_IS5_IS903	APH(4)-Ia	IS102_IS5_IS903-APH(4)-Ia	4781	0	1	1	0
LNLDJFT1-17	Broiler faeces	Chicken	Farm	Liaoning 3	Liaoning	k119_235312	LNLDJFT1-17_l500.fa-k119_235312	IS102_IS5_IS903	APH(4)-Ia	IS102_IS5_IS903-APH(4)-Ia	4781	0	1	1	0
LNLDJFT1-02	Broiler faeces	Chicken	Farm	Liaoning 3	Liaoning	k119_136865	LNLDJFT1-02_l500.fa-k119_136865	IS102_IS5_IS903	APH(4)-Ia	IS102_IS5_IS903-APH(4)-Ia	4781	0	1	1	0
LNLDJFT1-15	Broiler faeces	Chicken	Farm	Liaoning 3	Liaoning	k119_32124	LNLDJFT1-15_l500.fa-k119_32124	IS102_IS5_IS903	APH(4)-Ia	IS102_IS5_IS903-APH(4)-Ia	4781	0	1	1	0
LNLDJFT1-10	Broiler faeces	Chicken	Farm	Liaoning 3	Liaoning	k119_58377	LNLDJFT1-10_l500.fa-k119_58377	IS102_IS5_IS903	APH(4)-Ia	IS102_IS5_IS903-APH(4)-Ia	4781	0	1	1	0
PDJFT1S3L0610	Broiler faeces	Chicken	Farm	Shandong 1_1	Shandong	k119_118927	PDJFT1S3L0610_l500.fa-k119_118927	IS102_IS5_IS903	APH(4)-Ia	IS102_IS5_IS903-APH(4)-Ia	4781	0	1	1	0
PDJFT2S4L0212	Broiler faeces	Chicken	Farm	Shandong 1_1	Shandong	k119_10357	PDJFT2S4L0212_l500.fa-k119_10357	IS102_IS5_IS903	APH(4)-Ia	IS102_IS5_IS903-APH(4)-Ia	4781	0	1	1	0
PDJFT2S4L0313	Broiler faeces	Chicken	Farm	Shandong 1_1	Shandong	k119_26129	PDJFT2S4L0313_l500.fa-k119_26129	IS102_IS5_IS903	APH(4)-Ia	IS102_IS5_IS903-APH(4)-Ia	4781	0	1	1	0
PDJFT2S4L0414	Broiler faeces	Chicken	Farm	Shandong 1_1	Shandong	k119_7979	PDJFT2S4L0414_l500.fa-k119_7979	IS102_IS5_IS903	APH(4)-Ia	IS102_IS5_IS903-APH(4)-Ia	4781	0	1	1	0
PDJFT1S4L0819	Broiler faeces	Chicken	Farm	Shandong 1_1	Shandong	k119_7381	PDJFT1S4L0819_l500.fa-k119_7381	IS102_IS5_IS903	APH(4)-Ia	IS102_IS5_IS903-APH(4)-Ia	4781	0	1	1	0
PDJFT2S3L0202	Broiler faeces	Chicken	Farm	Shandong 1_1	Shandong	k119_25140	PDJFT2S3L0202_l500.fa-k119_25140	IS102_IS5_IS903	APH(4)-Ia	IS102_IS5_IS903-APH(4)-Ia	4781	0	1	1	0
PDJFT2S3L0609	Broiler faeces	Chicken	Farm	Shandong 1_1	Shandong	k119_1319	PDJFT2S3L0609_l500.fa-k119_1319	IS102_IS5_IS903	APH(4)-Ia	IS102_IS5_IS903-APH(4)-Ia	4781	0	1	1	0
PDJFL1A4	Broiler faeces	Chicken	Farm	Shandong 1_2	Shandong	k119_263420	PDJFL1A4_l500.fa-k119_263420	IS102_IS5_IS903	APH(4)-Ia	IS102_IS5_IS903-APH(4)-Ia	4781	0	1	1	0
PDJFL1C1	Broiler faeces	Chicken	Farm	Shandong 1_2	Shandong	k119_46433	PDJFL1C1_l500.fa-k119_46433	IS102_IS5_IS903	APH(4)-Ia	IS102_IS5_IS903-APH(4)-Ia	4781	0	1	1	0
PDJFL2C3	Broiler faeces	Chicken	Farm	Shandong 1_2	Shandong	k119_8584	PDJFL2C3_l500.fa-k119_8584	IS102_IS5_IS903	APH(4)-Ia	IS102_IS5_IS903-APH(4)-Ia	4781	0	1	1	0
PDJFL1A2	Broiler faeces	Chicken	Farm	Shandong 1_2	Shandong	k119_74486	PDJFL1A2_l500.fa-k119_74486	IS102_IS5_IS903	APH(4)-Ia	IS102_IS5_IS903-APH(4)-Ia	4781	0	1	1	0
PDJFL2A2	Broiler faeces	Chicken	Farm	Shandong 1_2	Shandong	k119_49026	PDJFL2A2_l500.fa-k119_49026	IS102_IS5_IS903	APH(4)-Ia	IS102_IS5_IS903-APH(4)-Ia	4781	0	1	1	0
PDJFL1C5	Broiler faeces	Chicken	Farm	Shandong 1_2	Shandong	k119_10557	PDJFL1C5_l500.fa-k119_10557	IS102_IS5_IS903	APH(4)-Ia	IS102_IS5_IS903-APH(4)-Ia	4781	0	1	1	0
HAYS1JFT1-7	Broiler faeces	Chicken	Farm	Henan 1	Henan	k119_108286	HAYS1JFT1-7_l500.fa-k119_108286	IS102_IS5_IS903	CTX-M-104	IS102_IS5_IS903-CTX-M-104	6	0	1	1	0
HAYS1JFT2-8	Broiler faeces	Chicken	Farm	Henan 1	Henan	k119_78192	HAYS1JFT2-8_l500.fa-k119_78192	IS102_IS5_IS903	CTX-M-104	IS102_IS5_IS903-CTX-M-104	6	0	1	1	0
HAYS1JFT1-4	Broiler faeces	Chicken	Farm	Henan 1	Henan	k119_21463	HAYS1JFT1-4_l500.fa-k119_21463	IS102_IS5_IS903	CTX-M-14	IS102_IS5_IS903-CTX-M-14	6	0	1	1	0
HAYS1JFT2-5	Broiler faeces	Chicken	Farm	Henan 1	Henan	k119_349207	HAYS1JFT2-5_l500.fa-k119_349207	IS102_IS5_IS903	CTX-M-14	IS102_IS5_IS903-CTX-M-14	6	0	1	1	0
HAYS1JFT2-7	Broiler faeces	Chicken	Farm	Henan 1	Henan	k119_937806	HAYS1JFT2-7_l500.fa-k119_937806	IS102_IS5_IS903	CTX-M-14	IS102_IS5_IS903-CTX-M-14	6	0	1	1	0
HAYS1JFT1-6	Broiler faeces	Chicken	Farm	Henan 1	Henan	k119_9829	HAYS1JFT1-6_l500.fa-k119_9829	IS102_IS5_IS903	CTX-M-14	IS102_IS5_IS903-CTX-M-14	6	0	1	1	0
HAYS2YMT1-5	Broiler Feather	Chicken	Farm	Henan 2	Henan	k119_211535	HAYS2YMT1-5_l500.fa-k119_211535	IS102_IS5_IS903	CTX-M-14	IS102_IS5_IS903-CTX-M-14	6	0	1	1	0
HAYS2YMT2-4	Broiler Feather	Chicken	Farm	Henan 2	Henan	k119_601826	HAYS2YMT2-4_l500.fa-k119_601826	IS102_IS5_IS903	CTX-M-14	IS102_IS5_IS903-CTX-M-14	6	0	1	1	0
HAYS3JFT2-15	Broiler faeces	Chicken	Farm	Henan 3	Henan	k119_120261	HAYS3JFT2-15_l500.fa-k119_120261	IS102_IS5_IS903	CTX-M-14	IS102_IS5_IS903-CTX-M-14	6	0	1	1	0
HAYS3JFT2-9	Broiler faeces	Chicken	Farm	Henan 3	Henan	k119_335447	HAYS3JFT2-9_l500.fa-k119_335447	IS102_IS5_IS903	CTX-M-14	IS102_IS5_IS903-CTX-M-14	6	0	1	1	0
HAYS3YMT2-1	Broiler Feather	Chicken	Farm	Henan 3	Henan	k119_130171	HAYS3YMT2-1_l500.fa-k119_130171	IS102_IS5_IS903	CTX-M-14	IS102_IS5_IS903-CTX-M-14	6	0	1	1	0
HAYS3YMT2-4	Broiler Feather	Chicken	Farm	Henan 3	Henan	k119_416530	HAYS3YMT2-4_l500.fa-k119_416530	IS102_IS5_IS903	CTX-M-14	IS102_IS5_IS903-CTX-M-14	6	0	1	1	0
LNPCJFT1_11	Broiler faeces	Chicken	Farm	Liaoning 1	Liaoning	k119_13473	LNPCJFT1_11_l500.fa-k119_13473	IS102_IS5_IS903	CTX-M-14	IS102_IS5_IS903-CTX-M-14	6	0	1	1	0
LNTPJFT2_05	Broiler faeces	Chicken	Farm	Liaoning 2	Liaoning	k119_561928	LNTPJFT2_05_l500.fa-k119_561928	IS102_IS5_IS903	CTX-M-14	IS102_IS5_IS903-CTX-M-14	6	0	1	1	0
LNTPJFT1_06	Broiler faeces	Chicken	Farm	Liaoning 2	Liaoning	k119_190264	LNTPJFT1_06_l500.fa-k119_190264	IS102_IS5_IS903	CTX-M-14	IS102_IS5_IS903-CTX-M-14	6	0	1	1	0
LNTPJFT1_16	Broiler faeces	Chicken	Farm	Liaoning 2	Liaoning	k119_516102	LNTPJFT1_16_l500.fa-k119_516102	IS102_IS5_IS903	CTX-M-14	IS102_IS5_IS903-CTX-M-14	6	0	1	1	0
LNTPJFT2_09	Broiler faeces	Chicken	Farm	Liaoning 2	Liaoning	k119_237271	LNTPJFT2_09_l500.fa-k119_237271	IS102_IS5_IS903	CTX-M-14	IS102_IS5_IS903-CTX-M-14	6	0	1	1	0
LNTPJFT2_11	Broiler faeces	Chicken	Farm	Liaoning 2	Liaoning	k119_143275	LNTPJFT2_11_l500.fa-k119_143275	IS102_IS5_IS903	CTX-M-14	IS102_IS5_IS903-CTX-M-14	6	0	1	1	0
LNTPJFT1_09	Broiler faeces	Chicken	Farm	Liaoning 2	Liaoning	k119_77891	LNTPJFT1_09_l500.fa-k119_77891	IS102_IS5_IS903	CTX-M-14	IS102_IS5_IS903-CTX-M-14	6	0	1	1	0
LNLDDMT2-01	Barn Floor	Environment	Farm	Liaoning 3	Liaoning	k119_288605	LNLDDMT2-01_l500.fa-k119_288605	IS102_IS5_IS903	CTX-M-14	IS102_IS5_IS903-CTX-M-14	6	0	1	1	0
LNLDDMT2-03	Barn Floor	Environment	Farm	Liaoning 3	Liaoning	k119_237226	LNLDDMT2-03_l500.fa-k119_237226	IS102_IS5_IS903	CTX-M-14	IS102_IS5_IS903-CTX-M-14	6	0	1	1	0
PDJFT2S4L0616	Broiler faeces	Chicken	Farm	Shandong 1_1	Shandong	k119_386	PDJFT2S4L0616_l500.fa-k119_386	IS102_IS5_IS903	CTX-M-14	IS102_IS5_IS903-CTX-M-14	6	0	1	1	0
PDJFT1S3L0508	Broiler faeces	Chicken	Farm	Shandong 1_1	Shandong	k119_31145	PDJFT1S3L0508_l500.fa-k119_31145	IS102_IS5_IS903	CTX-M-14	IS102_IS5_IS903-CTX-M-14	6	0	1	1	0
PDJFT2S3L0101	Broiler faeces	Chicken	Farm	Shandong 1_1	Shandong	k119_38602	PDJFT2S3L0101_l500.fa-k119_38602	IS102_IS5_IS903	CTX-M-14	IS102_IS5_IS903-CTX-M-14	6	0	1	1	0
PDJFT2S3L0304	Broiler faeces	Chicken	Farm	Shandong 1_1	Shandong	k119_9330	PDJFT2S3L0304_l500.fa-k119_9330	IS102_IS5_IS903	CTX-M-14	IS102_IS5_IS903-CTX-M-14	6	0	1	1	0
PDJFT1S3L0609	Broiler faeces	Chicken	Farm	Shandong 1_1	Shandong	k119_21520	PDJFT1S3L0609_l500.fa-k119_21520	IS102_IS5_IS903	CTX-M-14	IS102_IS5_IS903-CTX-M-14	6	0	1	1	0
PDJFT2S4L0718	Broiler faeces	Chicken	Farm	Shandong 1_1	Shandong	k119_105365	PDJFT2S4L0718_l500.fa-k119_105365	IS102_IS5_IS903	CTX-M-14	IS102_IS5_IS903-CTX-M-14	6	0	1	1	0
PDJFT2S3L0508	Broiler faeces	Chicken	Farm	Shandong 1_1	Shandong	k119_266409	PDJFT2S3L0508_l500.fa-k119_266409	IS102_IS5_IS903	CTX-M-14	IS102_IS5_IS903-CTX-M-14	6	0	1	1	0
SDPD1JTT3.15	Broiler carcass	Chicken	Slaughterhouse	Shandong 2	Shandong	k119_341925	SDPD1JTT3.15_l500.fa-k119_341925	IS102_IS5_IS903	CTX-M-14	IS102_IS5_IS903-CTX-M-14	6	0	1	1	0
SDPD1JFT1.03	Broiler faeces	Chicken	Farm	Shandong 2	Shandong	k119_96022	SDPD1JFT1.03_l500.fa-k119_96022	IS102_IS5_IS903	CTX-M-14	IS102_IS5_IS903-CTX-M-14	6	0	1	1	0
SDPD1JFT1.11	Broiler faeces	Chicken	Farm	Shandong 2	Shandong	k119_791926	SDPD1JFT1.11_l500.fa-k119_791926	IS102_IS5_IS903	CTX-M-14	IS102_IS5_IS903-CTX-M-14	6	0	1	1	0
SDPD1JFT1.15	Broiler faeces	Chicken	Farm	Shandong 2	Shandong	k119_414174	SDPD1JFT1.15_l500.fa-k119_414174	IS102_IS5_IS903	CTX-M-14	IS102_IS5_IS903-CTX-M-14	6	0	1	1	0
SDPD1JFT2.02	Broiler faeces	Chicken	Farm	Shandong 2	Shandong	k119_260777	SDPD1JFT2.02_l500.fa-k119_260777	IS102_IS5_IS903	CTX-M-14	IS102_IS5_IS903-CTX-M-14	6	0	1	1	0
SDPD1JFT2.12	Broiler faeces	Chicken	Farm	Shandong 2	Shandong	k119_374525	SDPD1JFT2.12_l500.fa-k119_374525	IS102_IS5_IS903	CTX-M-14	IS102_IS5_IS903-CTX-M-14	6	0	1	1	0
SDPD1JFT1.07	Broiler faeces	Chicken	Farm	Shandong 2	Shandong	k119_36318	SDPD1JFT1.07_l500.fa-k119_36318	IS102_IS5_IS903	CTX-M-14	IS102_IS5_IS903-CTX-M-14	6	0	1	1	0
SDPD1JFT1.08	Broiler faeces	Chicken	Farm	Shandong 2	Shandong	k119_418086	SDPD1JFT1.08_l500.fa-k119_418086	IS102_IS5_IS903	CTX-M-14	IS102_IS5_IS903-CTX-M-14	6	0	1	1	0
SDPD1JFT2.08	Broiler faeces	Chicken	Farm	Shandong 2	Shandong	k119_347421	SDPD1JFT2.08_l500.fa-k119_347421	IS102_IS5_IS903	CTX-M-14	IS102_IS5_IS903-CTX-M-14	6	0	1	1	0
SDPD1JFT2.13	Broiler faeces	Chicken	Farm	Shandong 2	Shandong	k119_681332	SDPD1JFT2.13_l500.fa-k119_681332	IS102_IS5_IS903	CTX-M-14	IS102_IS5_IS903-CTX-M-14	6	0	1	1	0
SDPD1YMT2.05	Broiler Feather	Chicken	Farm	Shandong 2	Shandong	k119_20858	SDPD1YMT2.05_l500.fa-k119_20858	IS102_IS5_IS903	CTX-M-14	IS102_IS5_IS903-CTX-M-14	6	0	1	1	0
SDPD3JFT2-11	Broiler faeces	Chicken	Farm	Shandong 3	Shandong	k119_32063	SDPD3JFT2-11_l500.fa-k119_32063	IS102_IS5_IS903	CTX-M-14	IS102_IS5_IS903-CTX-M-14	6	0	1	1	0
SDPD3JFT2-12	Broiler faeces	Chicken	Farm	Shandong 3	Shandong	k119_84546	SDPD3JFT2-12_l500.fa-k119_84546	IS102_IS5_IS903	CTX-M-14	IS102_IS5_IS903-CTX-M-14	6	0	1	1	0
SDPD3JFT2-01	Broiler faeces	Chicken	Farm	Shandong 3	Shandong	k119_19125	SDPD3JFT2-01_l500.fa-k119_19125	IS102_IS5_IS903	CTX-M-14	IS102_IS5_IS903-CTX-M-14	6	0	1	1	0
SDPD4JFT1-01	Broiler faeces	Chicken	Farm	Shandong 4	Shandong	k119_316592	SDPD4JFT1-01_l500.fa-k119_316592	IS102_IS5_IS903	CTX-M-14	IS102_IS5_IS903-CTX-M-14	6	0	1	1	0
SDPD4JFT1-08	Broiler faeces	Chicken	Farm	Shandong 4	Shandong	k119_565401	SDPD4JFT1-08_l500.fa-k119_565401	IS102_IS5_IS903	CTX-M-14	IS102_IS5_IS903-CTX-M-14	6	0	1	1	0
SDPD4JFT2-09	Broiler faeces	Chicken	Farm	Shandong 4	Shandong	k119_29147	SDPD4JFT2-09_l500.fa-k119_29147	IS102_IS5_IS903	CTX-M-14	IS102_IS5_IS903-CTX-M-14	6	0	1	1	0
SDPD4JFT2-07	Broiler faeces	Chicken	Farm	Shandong 4	Shandong	k119_506287	SDPD4JFT2-07_l500.fa-k119_506287	IS102_IS5_IS903	CTX-M-14	IS102_IS5_IS903-CTX-M-14	6	0	1	1	0
SDPD4YMT1-02	Broiler Feather	Chicken	Farm	Shandong 4	Shandong	k119_179726	SDPD4YMT1-02_l500.fa-k119_179726	IS102_IS5_IS903	CTX-M-14	IS102_IS5_IS903-CTX-M-14	6	0	1	1	0
LNPCJFT2_05	Broiler faeces	Chicken	Farm	Liaoning 1	Liaoning	k119_41851	LNPCJFT2_05_l500.fa-k119_41851	IS102_IS5_IS903	CTX-M-27	IS102_IS5_IS903-CTX-M-27	6	0	1	1	0
LNPCJFT2_18	Broiler faeces	Chicken	Farm	Liaoning 1	Liaoning	k119_25192	LNPCJFT2_18_l500.fa-k119_25192	IS102_IS5_IS903	CTX-M-27	IS102_IS5_IS903-CTX-M-27	6	0	1	1	0
LNTPDMT1_01	Barn Floor	Environment	Farm	Liaoning 2	Liaoning	k119_1098260	LNTPDMT1_01_l500.fa-k119_1098260	IS102_IS5_IS903	CTX-M-27	IS102_IS5_IS903-CTX-M-27	6	0	1	1	0
LNTPDMT2_03	Barn Floor	Environment	Farm	Liaoning 2	Liaoning	k119_520979	LNTPDMT2_03_l500.fa-k119_520979	IS102_IS5_IS903	CTX-M-27	IS102_IS5_IS903-CTX-M-27	6	0	1	1	0
LNLDDMT1-03	Barn Floor	Environment	Farm	Liaoning 3	Liaoning	k119_20489	LNLDDMT1-03_l500.fa-k119_20489	IS102_IS5_IS903	CTX-M-27	IS102_IS5_IS903-CTX-M-27	6	0	1	1	0
PDJFT1S3L0101	Broiler faeces	Chicken	Farm	Shandong 1_1	Shandong	k119_299896	PDJFT1S3L0101_l500.fa-k119_299896	IS102_IS5_IS903	CTX-M-27	IS102_IS5_IS903-CTX-M-27	6	0	1	1	0
PDJFT1S3L0202	Broiler faeces	Chicken	Farm	Shandong 1_1	Shandong	k119_311245	PDJFT1S3L0202_l500.fa-k119_311245	IS102_IS5_IS903	CTX-M-27	IS102_IS5_IS903-CTX-M-27	6	0	1	1	0
PDJFT1S4L0212	Broiler faeces	Chicken	Farm	Shandong 1_1	Shandong	k119_214667	PDJFT1S4L0212_l500.fa-k119_214667	IS102_IS5_IS903	CTX-M-27	IS102_IS5_IS903-CTX-M-27	6	0	1	1	0
PDJFT1S4L0313	Broiler faeces	Chicken	Farm	Shandong 1_1	Shandong	k119_11754	PDJFT1S4L0313_l500.fa-k119_11754	IS102_IS5_IS903	CTX-M-27	IS102_IS5_IS903-CTX-M-27	6	0	1	1	0
PDJFT1S4L0515	Broiler faeces	Chicken	Farm	Shandong 1_1	Shandong	k119_39193	PDJFT1S4L0515_l500.fa-k119_39193	IS102_IS5_IS903	CTX-M-27	IS102_IS5_IS903-CTX-M-27	6	0	1	1	0
PDJFT2S3L0202	Broiler faeces	Chicken	Farm	Shandong 1_1	Shandong	k119_8712	PDJFT2S3L0202_l500.fa-k119_8712	IS102_IS5_IS903	CTX-M-27	IS102_IS5_IS903-CTX-M-27	6	0	1	1	0
PDJFT2S3L0303	Broiler faeces	Chicken	Farm	Shandong 1_1	Shandong	k119_16267	PDJFT2S3L0303_l500.fa-k119_16267	IS102_IS5_IS903	CTX-M-27	IS102_IS5_IS903-CTX-M-27	6	0	1	1	0
PDJFT2S3L0507	Broiler faeces	Chicken	Farm	Shandong 1_1	Shandong	k119_42733	PDJFT2S3L0507_l500.fa-k119_42733	IS102_IS5_IS903	CTX-M-27	IS102_IS5_IS903-CTX-M-27	6	0	1	1	0
PDJFT2S3L0609	Broiler faeces	Chicken	Farm	Shandong 1_1	Shandong	k119_12045	PDJFT2S3L0609_l500.fa-k119_12045	IS102_IS5_IS903	CTX-M-27	IS102_IS5_IS903-CTX-M-27	6	0	1	1	0
PDJFT2S3L0610	Broiler faeces	Chicken	Farm	Shandong 1_1	Shandong	k119_33069	PDJFT2S3L0610_l500.fa-k119_33069	IS102_IS5_IS903	CTX-M-27	IS102_IS5_IS903-CTX-M-27	6	0	1	1	0
PDJFT2S4L0515	Broiler faeces	Chicken	Farm	Shandong 1_1	Shandong	k119_18701	PDJFT2S4L0515_l500.fa-k119_18701	IS102_IS5_IS903	CTX-M-27	IS102_IS5_IS903-CTX-M-27	6	0	1	1	0
PDJFT1S4L0616	Broiler faeces	Chicken	Farm	Shandong 1_1	Shandong	k119_59374	PDJFT1S4L0616_l500.fa-k119_59374	IS102_IS5_IS903	CTX-M-27	IS102_IS5_IS903-CTX-M-27	6	0	1	1	0
PDJFT2S3L0406	Broiler faeces	Chicken	Farm	Shandong 1_1	Shandong	k119_89531	PDJFT2S3L0406_l500.fa-k119_89531	IS102_IS5_IS903	CTX-M-27	IS102_IS5_IS903-CTX-M-27	6	0	1	1	0
HAYS1JTT3-6	Broiler carcass	Chicken	Slaughterhouse	Henan 1	Henan	k119_114536	HAYS1JTT3-6_l500.fa-k119_114536	IS102_IS5_IS903	CTX-M-65	IS102_IS5_IS903-CTX-M-65	6	0	1	1	0
HAYS1JFT1-1	Broiler faeces	Chicken	Farm	Henan 1	Henan	k119_50723	HAYS1JFT1-1_l500.fa-k119_50723	IS102_IS5_IS903	CTX-M-65	IS102_IS5_IS903-CTX-M-65	6	0	1	1	0
HAYS1JFT1-3	Broiler faeces	Chicken	Farm	Henan 1	Henan	k119_138715	HAYS1JFT1-3_l500.fa-k119_138715	IS102_IS5_IS903	CTX-M-65	IS102_IS5_IS903-CTX-M-65	6	0	1	1	0
HAYS1JFT2-1	Broiler faeces	Chicken	Farm	Henan 1	Henan	k119_181381	HAYS1JFT2-1_l500.fa-k119_181381	IS102_IS5_IS903	CTX-M-65	IS102_IS5_IS903-CTX-M-65	6	0	1	1	0
HAYS1JFT2-2	Broiler faeces	Chicken	Farm	Henan 1	Henan	k119_7506	HAYS1JFT2-2_l500.fa-k119_7506	IS102_IS5_IS903	CTX-M-65	IS102_IS5_IS903-CTX-M-65	6	0	1	1	0
HAYS1JFT2-4	Broiler faeces	Chicken	Farm	Henan 1	Henan	k119_181748	HAYS1JFT2-4_l500.fa-k119_181748	IS102_IS5_IS903	CTX-M-65	IS102_IS5_IS903-CTX-M-65	6	0	1	1	0
HAYS1JFT2-6	Broiler faeces	Chicken	Farm	Henan 1	Henan	k119_201349	HAYS1JFT2-6_l500.fa-k119_201349	IS102_IS5_IS903	CTX-M-65	IS102_IS5_IS903-CTX-M-65	6	0	1	1	0
HAYS2JFT1-11	Broiler faeces	Chicken	Farm	Henan 2	Henan	k119_416954	HAYS2JFT1-11_l500.fa-k119_416954	IS102_IS5_IS903	CTX-M-65	IS102_IS5_IS903-CTX-M-65	6	0	1	1	0
HAYS2JFT1-13	Broiler faeces	Chicken	Farm	Henan 2	Henan	k119_254476	HAYS2JFT1-13_l500.fa-k119_254476	IS102_IS5_IS903	CTX-M-65	IS102_IS5_IS903-CTX-M-65	6	0	1	1	0
HAYS2JFT1-15	Broiler faeces	Chicken	Farm	Henan 2	Henan	k119_20323	HAYS2JFT1-15_l500.fa-k119_20323	IS102_IS5_IS903	CTX-M-65	IS102_IS5_IS903-CTX-M-65	6	0	1	1	0
HAYS2JFT2-11	Broiler faeces	Chicken	Farm	Henan 2	Henan	k119_27243	HAYS2JFT2-11_l500.fa-k119_27243	IS102_IS5_IS903	CTX-M-65	IS102_IS5_IS903-CTX-M-65	6	0	1	1	0
HAYS2YMT1-1	Broiler Feather	Chicken	Farm	Henan 2	Henan	k119_57108	HAYS2YMT1-1_l500.fa-k119_57108	IS102_IS5_IS903	CTX-M-65	IS102_IS5_IS903-CTX-M-65	6	0	1	1	0
HAYS2YMT1-2	Broiler Feather	Chicken	Farm	Henan 2	Henan	k119_985011	HAYS2YMT1-2_l500.fa-k119_985011	IS102_IS5_IS903	CTX-M-65	IS102_IS5_IS903-CTX-M-65	6	0	1	1	0
HAYS2YMT2-1	Broiler Feather	Chicken	Farm	Henan 2	Henan	k119_186009	HAYS2YMT2-1_l500.fa-k119_186009	IS102_IS5_IS903	CTX-M-65	IS102_IS5_IS903-CTX-M-65	6	0	1	1	0
HAYS2YMT2-5	Broiler Feather	Chicken	Farm	Henan 2	Henan	k119_313378	HAYS2YMT2-5_l500.fa-k119_313378	IS102_IS5_IS903	CTX-M-65	IS102_IS5_IS903-CTX-M-65	6	0	1	1	0
HAYS3HCT2-2	Barn Floor	Environment	Farm	Henan 3	Henan	k119_528892	HAYS3HCT2-2_l500.fa-k119_528892	IS102_IS5_IS903	CTX-M-65	IS102_IS5_IS903-CTX-M-65	6	0	1	1	0
HAYS3JFT1-13	Broiler faeces	Chicken	Farm	Henan 3	Henan	k119_53763	HAYS3JFT1-13_l500.fa-k119_53763	IS102_IS5_IS903	CTX-M-65	IS102_IS5_IS903-CTX-M-65	6	0	1	1	0
HAYS3JFT1-14	Broiler faeces	Chicken	Farm	Henan 3	Henan	k119_66160	HAYS3JFT1-14_l500.fa-k119_66160	IS102_IS5_IS903	CTX-M-65	IS102_IS5_IS903-CTX-M-65	6	0	1	1	0
HAYS3JFT1-15	Broiler faeces	Chicken	Farm	Henan 3	Henan	k119_35549	HAYS3JFT1-15_l500.fa-k119_35549	IS102_IS5_IS903	CTX-M-65	IS102_IS5_IS903-CTX-M-65	6	0	1	1	0
HAYS3JFT1-2	Broiler faeces	Chicken	Farm	Henan 3	Henan	k119_24309	HAYS3JFT1-2_l500.fa-k119_24309	IS102_IS5_IS903	CTX-M-65	IS102_IS5_IS903-CTX-M-65	6	0	1	1	0
HAYS3JFT1-4	Broiler faeces	Chicken	Farm	Henan 3	Henan	k119_24201	HAYS3JFT1-4_l500.fa-k119_24201	IS102_IS5_IS903	CTX-M-65	IS102_IS5_IS903-CTX-M-65	6	0	1	1	0
HAYS3JFT1-7	Broiler faeces	Chicken	Farm	Henan 3	Henan	k119_13343	HAYS3JFT1-7_l500.fa-k119_13343	IS102_IS5_IS903	CTX-M-65	IS102_IS5_IS903-CTX-M-65	6	0	1	1	0
HAYS3JFT1-8	Broiler faeces	Chicken	Farm	Henan 3	Henan	k119_2493137	HAYS3JFT1-8_l500.fa-k119_2493137	IS102_IS5_IS903	CTX-M-65	IS102_IS5_IS903-CTX-M-65	6	0	1	1	0
HAYS3JFT2-11	Broiler faeces	Chicken	Farm	Henan 3	Henan	k119_108686	HAYS3JFT2-11_l500.fa-k119_108686	IS102_IS5_IS903	CTX-M-65	IS102_IS5_IS903-CTX-M-65	6	0	1	1	0
HAYS3JFT2-8	Broiler faeces	Chicken	Farm	Henan 3	Henan	k119_70899	HAYS3JFT2-8_l500.fa-k119_70899	IS102_IS5_IS903	CTX-M-65	IS102_IS5_IS903-CTX-M-65	6	0	1	1	0
HAYS3YMT2-3	Broiler Feather	Chicken	Farm	Henan 3	Henan	k119_50836	HAYS3YMT2-3_l500.fa-k119_50836	IS102_IS5_IS903	CTX-M-65	IS102_IS5_IS903-CTX-M-65	6	0	1	1	0
HAYS3YMT1-02	Broiler Feather	Chicken	Farm	Henan 3	Henan	k119_825296	HAYS3YMT1-02_l500.fa-k119_825296	IS102_IS5_IS903	CTX-M-65	IS102_IS5_IS903-CTX-M-65	6	0	1	1	0
HAYS3YMT1-03	Broiler Feather	Chicken	Farm	Henan 3	Henan	k119_128135	HAYS3YMT1-03_l500.fa-k119_128135	IS102_IS5_IS903	CTX-M-65	IS102_IS5_IS903-CTX-M-65	6	0	1	1	0
HAYS3YMT1-04	Broiler Feather	Chicken	Farm	Henan 3	Henan	k119_608031	HAYS3YMT1-04_l500.fa-k119_608031	IS102_IS5_IS903	CTX-M-65	IS102_IS5_IS903-CTX-M-65	6	0	1	1	0
HAYS3YMT1-01	Broiler Feather	Chicken	Farm	Henan 3	Henan	k119_271633	HAYS3YMT1-01_l500.fa-k119_271633	IS102_IS5_IS903	CTX-M-65	IS102_IS5_IS903-CTX-M-65	6	0	1	1	0
LNPCJFT1_01	Broiler faeces	Chicken	Farm	Liaoning 1	Liaoning	k119_11031	LNPCJFT1_01_l500.fa-k119_11031	IS102_IS5_IS903	CTX-M-65	IS102_IS5_IS903-CTX-M-65	6	0	1	1	0
LNPCJFT1_15	Broiler faeces	Chicken	Farm	Liaoning 1	Liaoning	k119_67147	LNPCJFT1_15_l500.fa-k119_67147	IS102_IS5_IS903	CTX-M-65	IS102_IS5_IS903-CTX-M-65	6	0	1	1	0
LNPCJFT2_07	Broiler faeces	Chicken	Farm	Liaoning 1	Liaoning	k119_368984	LNPCJFT2_07_l500.fa-k119_368984	IS102_IS5_IS903	CTX-M-65	IS102_IS5_IS903-CTX-M-65	6	0	1	1	0
LNPCJFT2_09	Broiler faeces	Chicken	Farm	Liaoning 1	Liaoning	k119_290491	LNPCJFT2_09_l500.fa-k119_290491	IS102_IS5_IS903	CTX-M-65	IS102_IS5_IS903-CTX-M-65	6	0	1	1	0
LNPCJFT2_19	Broiler faeces	Chicken	Farm	Liaoning 1	Liaoning	k119_161460	LNPCJFT2_19_l500.fa-k119_161460	IS102_IS5_IS903	CTX-M-65	IS102_IS5_IS903-CTX-M-65	6	0	1	1	0
LNPCJFT1_17	Broiler faeces	Chicken	Farm	Liaoning 1	Liaoning	k119_85874	LNPCJFT1_17_l500.fa-k119_85874	IS102_IS5_IS903	CTX-M-65	IS102_IS5_IS903-CTX-M-65	6	0	1	1	0
LNPCJFT2_17	Broiler faeces	Chicken	Farm	Liaoning 1	Liaoning	k119_11155	LNPCJFT2_17_l500.fa-k119_11155	IS102_IS5_IS903	CTX-M-65	IS102_IS5_IS903-CTX-M-65	135	0	1	1	0
LNLDDMT1-01	Barn Floor	Environment	Farm	Liaoning 3	Liaoning	k119_452026	LNLDDMT1-01_l500.fa-k119_452026	IS102_IS5_IS903	CTX-M-65	IS102_IS5_IS903-CTX-M-65	6	0	1	1	0
LNLDJFT2-19	Broiler faeces	Chicken	Farm	Liaoning 3	Liaoning	k119_619443	LNLDJFT2-19_l500.fa-k119_619443	IS102_IS5_IS903	CTX-M-65	IS102_IS5_IS903-CTX-M-65	6	0	1	1	0
LNLDJFT2-11	Broiler faeces	Chicken	Farm	Liaoning 3	Liaoning	k119_310676	LNLDJFT2-11_l500.fa-k119_310676	IS102_IS5_IS903	CTX-M-65	IS102_IS5_IS903-CTX-M-65	6	0	1	1	0
PDJFT1S3L0304	Broiler faeces	Chicken	Farm	Shandong 1_1	Shandong	k119_195688	PDJFT1S3L0304_l500.fa-k119_195688	IS102_IS5_IS903	CTX-M-65	IS102_IS5_IS903-CTX-M-65	6	0	1	1	0
PDJFT1S3L0406	Broiler faeces	Chicken	Farm	Shandong 1_1	Shandong	k119_340739	PDJFT1S3L0406_l500.fa-k119_340739	IS102_IS5_IS903	CTX-M-65	IS102_IS5_IS903-CTX-M-65	6	0	1	1	0
PDJFT1S3L0610	Broiler faeces	Chicken	Farm	Shandong 1_1	Shandong	k119_344266	PDJFT1S3L0610_l500.fa-k119_344266	IS102_IS5_IS903	CTX-M-65	IS102_IS5_IS903-CTX-M-65	6	0	1	1	0
PDJFT2S4L0819	Broiler faeces	Chicken	Farm	Shandong 1_1	Shandong	k119_59184	PDJFT2S4L0819_l500.fa-k119_59184	IS102_IS5_IS903	CTX-M-65	IS102_IS5_IS903-CTX-M-65	6	0	1	1	0
PDJFT2S4L0820	Broiler faeces	Chicken	Farm	Shandong 1_1	Shandong	k119_145923	PDJFT2S4L0820_l500.fa-k119_145923	IS102_IS5_IS903	CTX-M-65	IS102_IS5_IS903-CTX-M-65	6	0	1	1	0
PDJFL2C3	Broiler faeces	Chicken	Farm	Shandong 1_2	Shandong	k119_21275	PDJFL2C3_l500.fa-k119_21275	IS102_IS5_IS903	CTX-M-65	IS102_IS5_IS903-CTX-M-65	6	0	1	1	0
PDJFL1A1	Broiler faeces	Chicken	Farm	Shandong 1_2	Shandong	k119_14677	PDJFL1A1_l500.fa-k119_14677	IS102_IS5_IS903	CTX-M-65	IS102_IS5_IS903-CTX-M-65	6	0	1	1	0
PDJFL1A2	Broiler faeces	Chicken	Farm	Shandong 1_2	Shandong	k119_8517	PDJFL1A2_l500.fa-k119_8517	IS102_IS5_IS903	CTX-M-65	IS102_IS5_IS903-CTX-M-65	6	0	1	1	0
PDJFL1A4	Broiler faeces	Chicken	Farm	Shandong 1_2	Shandong	k119_69456	PDJFL1A4_l500.fa-k119_69456	IS102_IS5_IS903	CTX-M-65	IS102_IS5_IS903-CTX-M-65	6	0	1	1	0
PDJFL1A5	Broiler faeces	Chicken	Farm	Shandong 1_2	Shandong	k119_66278	PDJFL1A5_l500.fa-k119_66278	IS102_IS5_IS903	CTX-M-65	IS102_IS5_IS903-CTX-M-65	6	0	1	1	0
PDJFL1A6	Broiler faeces	Chicken	Farm	Shandong 1_2	Shandong	k119_89043	PDJFL1A6_l500.fa-k119_89043	IS102_IS5_IS903	CTX-M-65	IS102_IS5_IS903-CTX-M-65	6	0	1	1	0
PDJFL1C1	Broiler faeces	Chicken	Farm	Shandong 1_2	Shandong	k119_73754	PDJFL1C1_l500.fa-k119_73754	IS102_IS5_IS903	CTX-M-65	IS102_IS5_IS903-CTX-M-65	6	0	1	1	0
PDJFL1C2	Broiler faeces	Chicken	Farm	Shandong 1_2	Shandong	k119_164560	PDJFL1C2_l500.fa-k119_164560	IS102_IS5_IS903	CTX-M-65	IS102_IS5_IS903-CTX-M-65	6	0	1	1	0
PDJFL1C3	Broiler faeces	Chicken	Farm	Shandong 1_2	Shandong	k119_585745	PDJFL1C3_l500.fa-k119_585745	IS102_IS5_IS903	CTX-M-65	IS102_IS5_IS903-CTX-M-65	6	0	1	1	0
PDJFL1C4	Broiler faeces	Chicken	Farm	Shandong 1_2	Shandong	k119_13121	PDJFL1C4_l500.fa-k119_13121	IS102_IS5_IS903	CTX-M-65	IS102_IS5_IS903-CTX-M-65	6	0	1	1	0
PDJFL1C5	Broiler faeces	Chicken	Farm	Shandong 1_2	Shandong	k119_23737	PDJFL1C5_l500.fa-k119_23737	IS102_IS5_IS903	CTX-M-65	IS102_IS5_IS903-CTX-M-65	6	0	1	1	0
PDJFL1C6	Broiler faeces	Chicken	Farm	Shandong 1_2	Shandong	k119_19594	PDJFL1C6_l500.fa-k119_19594	IS102_IS5_IS903	CTX-M-65	IS102_IS5_IS903-CTX-M-65	6	0	1	1	0
PDJFL2A1	Broiler faeces	Chicken	Farm	Shandong 1_2	Shandong	k119_115793	PDJFL2A1_l500.fa-k119_115793	IS102_IS5_IS903	CTX-M-65	IS102_IS5_IS903-CTX-M-65	6	0	1	1	0
PDJFL2A2	Broiler faeces	Chicken	Farm	Shandong 1_2	Shandong	k119_279763	PDJFL2A2_l500.fa-k119_279763	IS102_IS5_IS903	CTX-M-65	IS102_IS5_IS903-CTX-M-65	6	0	1	1	0
PDJFL2C1	Broiler faeces	Chicken	Farm	Shandong 1_2	Shandong	k119_302013	PDJFL2C1_l500.fa-k119_302013	IS102_IS5_IS903	CTX-M-65	IS102_IS5_IS903-CTX-M-65	6	0	1	1	0
PDJFL2C2	Broiler faeces	Chicken	Farm	Shandong 1_2	Shandong	k119_38964	PDJFL2C2_l500.fa-k119_38964	IS102_IS5_IS903	CTX-M-65	IS102_IS5_IS903-CTX-M-65	6	0	1	1	0
PDJFL2C5	Broiler faeces	Chicken	Farm	Shandong 1_2	Shandong	k119_232043	PDJFL2C5_l500.fa-k119_232043	IS102_IS5_IS903	CTX-M-65	IS102_IS5_IS903-CTX-M-65	6	0	1	1	0
PDJFL1A3	Broiler faeces	Chicken	Farm	Shandong 1_2	Shandong	k119_19833	PDJFL1A3_l500.fa-k119_19833	IS102_IS5_IS903	CTX-M-65	IS102_IS5_IS903-CTX-M-65	6	0	1	1	0
PDJFL2C4	Broiler faeces	Chicken	Farm	Shandong 1_2	Shandong	k119_52178	PDJFL2C4_l500.fa-k119_52178	IS102_IS5_IS903	CTX-M-65	IS102_IS5_IS903-CTX-M-65	6	0	1	1	0
SDPD1JFT1.06	Broiler faeces	Chicken	Farm	Shandong 2	Shandong	k119_136657	SDPD1JFT1.06_l500.fa-k119_136657	IS102_IS5_IS903	CTX-M-65	IS102_IS5_IS903-CTX-M-65	6	0	1	1	0
SDPD1JFT1.01	Broiler faeces	Chicken	Farm	Shandong 2	Shandong	k119_189860	SDPD1JFT1.01_l500.fa-k119_189860	IS102_IS5_IS903	CTX-M-65	IS102_IS5_IS903-CTX-M-65	6	0	1	1	0
SDPD1JFT2.14	Broiler faeces	Chicken	Farm	Shandong 2	Shandong	k119_776972	SDPD1JFT2.14_l500.fa-k119_776972	IS102_IS5_IS903	CTX-M-65	IS102_IS5_IS903-CTX-M-65	6	0	1	1	0
SDPD3JFT1-19	Broiler faeces	Chicken	Farm	Shandong 3	Shandong	k119_117664	SDPD3JFT1-19_l500.fa-k119_117664	IS102_IS5_IS903	CTX-M-65	IS102_IS5_IS903-CTX-M-65	6	0	1	1	0
SDPD3JFT1-20	Broiler faeces	Chicken	Farm	Shandong 3	Shandong	k119_202856	SDPD3JFT1-20_l500.fa-k119_202856	IS102_IS5_IS903	CTX-M-65	IS102_IS5_IS903-CTX-M-65	6	0	1	1	0
SDPD3JFT2-03	Broiler faeces	Chicken	Farm	Shandong 3	Shandong	k119_9560	SDPD3JFT2-03_l500.fa-k119_9560	IS102_IS5_IS903	CTX-M-65	IS102_IS5_IS903-CTX-M-65	6	0	1	1	0
SDPD3JFT2-02	Broiler faeces	Chicken	Farm	Shandong 3	Shandong	k119_48080	SDPD3JFT2-02_l500.fa-k119_48080	IS102_IS5_IS903	CTX-M-65	IS102_IS5_IS903-CTX-M-65	6	0	1	1	0
SDPD3TWT3-01	Wastewater	Environment	Slaughterhouse	Shandong 3	Shandong	k119_80602	SDPD3TWT3-01_l500.fa-k119_80602	IS102_IS5_IS903	CTX-M-65	IS102_IS5_IS903-CTX-M-65	6	0	1	1	0
SDPD4JFT2-01	Broiler faeces	Chicken	Farm	Shandong 4	Shandong	k119_511693	SDPD4JFT2-01_l500.fa-k119_511693	IS102_IS5_IS903	CTX-M-65	IS102_IS5_IS903-CTX-M-65	6	0	1	1	0
SDPD4JFT2-13	Broiler faeces	Chicken	Farm	Shandong 4	Shandong	k119_502600	SDPD4JFT2-13_l500.fa-k119_502600	IS102_IS5_IS903	CTX-M-65	IS102_IS5_IS903-CTX-M-65	6	0	1	1	0
SDPD4JFT2-03	Broiler faeces	Chicken	Farm	Shandong 4	Shandong	k119_535822	SDPD4JFT2-03_l500.fa-k119_535822	IS102_IS5_IS903	CTX-M-65	IS102_IS5_IS903-CTX-M-65	6	0	1	1	0
LNPCJFT1_17	Broiler faeces	Chicken	Farm	Liaoning 1	Liaoning	k119_13202	LNPCJFT1_17_l500.fa-k119_13202	IS102_IS5_IS903	MCR-8	IS102_IS5_IS903-MCR-8	4327	0	1	1	0
LNPCJFT2_03	Broiler faeces	Chicken	Farm	Liaoning 1	Liaoning	k119_78635	LNPCJFT2_03_l500.fa-k119_78635	IS102_IS5_IS903	MCR-8	IS102_IS5_IS903-MCR-8	4327	0	1	1	0
LNPCJFT2_19	Broiler faeces	Chicken	Farm	Liaoning 1	Liaoning	k119_51345	LNPCJFT2_19_l500.fa-k119_51345	IS102_IS5_IS903	MCR-8	IS102_IS5_IS903-MCR-8	4327	0	1	1	0
LNPCJFT2_05	Broiler faeces	Chicken	Farm	Liaoning 1	Liaoning	k119_333410	LNPCJFT2_05_l500.fa-k119_333410	IS102_IS5_IS903	MCR-8	IS102_IS5_IS903-MCR-8	4327	0	1	1	0
LNLDDMT1-03	Barn Floor	Environment	Farm	Liaoning 3	Liaoning	k119_139736	LNLDDMT1-03_l500.fa-k119_139736	IS102_IS5_IS903	MCR-8	IS102_IS5_IS903-MCR-8	4328	0	1	1	0
HAYS1JFT1-1	Broiler faeces	Chicken	Farm	Henan 1	Henan	k119_42039	HAYS1JFT1-1_l500.fa-k119_42039	IS103_IS3_IS150	mdtC	IS103_IS3_IS150-mdtC	4964	0	1	1	0
SDPD1JFT1.02	Broiler faeces	Chicken	Farm	Shandong 2	Shandong	k119_57244	SDPD1JFT1.02_l500.fa-k119_57244	IS103_IS3_IS150	mdtC	IS103_IS3_IS150-mdtC	4947	0	1	1	0
HAYS1JFT1-5	Broiler faeces	Chicken	Farm	Henan 1	Henan	k119_345849	HAYS1JFT1-5_l500.fa-k119_345849	IS10L_IS4_IS10	tet(B)	IS10L_IS4_IS10-tet(B)	1207	0	1	1	0
HAYS1JFT1-7	Broiler faeces	Chicken	Farm	Henan 1	Henan	k119_98305	HAYS1JFT1-7_l500.fa-k119_98305	IS10L_IS4_IS10	tet(B)	IS10L_IS4_IS10-tet(B)	1207	0	1	1	0
HAYS1JFT2-1	Broiler faeces	Chicken	Farm	Henan 1	Henan	k119_134106	HAYS1JFT2-1_l500.fa-k119_134106	IS10L_IS4_IS10	tet(B)	IS10L_IS4_IS10-tet(B)	1207	0	1	1	0
HAYS1JFT2-8	Broiler faeces	Chicken	Farm	Henan 1	Henan	k119_42788	HAYS1JFT2-8_l500.fa-k119_42788	IS10L_IS4_IS10	tet(B)	IS10L_IS4_IS10-tet(B)	1207	0	1	1	0
HAYS1JFT1-6	Broiler faeces	Chicken	Farm	Henan 1	Henan	k119_111508	HAYS1JFT1-6_l500.fa-k119_111508	IS10L_IS4_IS10	tet(B)	IS10L_IS4_IS10-tet(B)	1207	0	1	1	0
HAYS1JFT1-2	Broiler faeces	Chicken	Farm	Henan 1	Henan	k119_231668	HAYS1JFT1-2_l500.fa-k119_231668	IS10L_IS4_IS10	tet(B)	IS10L_IS4_IS10-tet(B)	4078	0	1	1	0
HAYS1JFT2-7	Broiler faeces	Chicken	Farm	Henan 1	Henan	k119_732205	HAYS1JFT2-7_l500.fa-k119_732205	IS10L_IS4_IS10	tet(B)	IS10L_IS4_IS10-tet(B)	4078	0	1	1	0
HAYS2JFT1-8	Broiler faeces	Chicken	Farm	Henan 2	Henan	k119_158038	HAYS2JFT1-8_l500.fa-k119_158038	IS10L_IS4_IS10	tet(B)	IS10L_IS4_IS10-tet(B)	1207	0	1	1	0
HAYS3JFT1-14	Broiler faeces	Chicken	Farm	Henan 3	Henan	k119_154342	HAYS3JFT1-14_l500.fa-k119_154342	IS10L_IS4_IS10	tet(B)	IS10L_IS4_IS10-tet(B)	1207	0	1	1	0
HAYS3JFT1-7	Broiler faeces	Chicken	Farm	Henan 3	Henan	k119_123052	HAYS3JFT1-7_l500.fa-k119_123052	IS10L_IS4_IS10	tet(B)	IS10L_IS4_IS10-tet(B)	1207	0	1	1	0
HAYS3JFT1-8	Broiler faeces	Chicken	Farm	Henan 3	Henan	k119_1840743	HAYS3JFT1-8_l500.fa-k119_1840743	IS10L_IS4_IS10	tet(B)	IS10L_IS4_IS10-tet(B)	1207	0	1	1	0
HAYS3JFT2-11	Broiler faeces	Chicken	Farm	Henan 3	Henan	k119_285044	HAYS3JFT2-11_l500.fa-k119_285044	IS10L_IS4_IS10	tet(B)	IS10L_IS4_IS10-tet(B)	1207	0	1	1	0
HAYS3JFT2-12	Broiler faeces	Chicken	Farm	Henan 3	Henan	k119_142236	HAYS3JFT2-12_l500.fa-k119_142236	IS10L_IS4_IS10	tet(B)	IS10L_IS4_IS10-tet(B)	1207	0	1	1	0
HAYS3JFT2-8	Broiler faeces	Chicken	Farm	Henan 3	Henan	k119_294460	HAYS3JFT2-8_l500.fa-k119_294460	IS10L_IS4_IS10	tet(B)	IS10L_IS4_IS10-tet(B)	1207	0	1	1	0
HAYS3YMT2-3	Broiler Feather	Chicken	Farm	Henan 3	Henan	k119_1130058	HAYS3YMT2-3_l500.fa-k119_1130058	IS10L_IS4_IS10	tet(B)	IS10L_IS4_IS10-tet(B)	1207	0	1	1	0
LNPCJFT1_08	Broiler faeces	Chicken	Farm	Liaoning 1	Liaoning	k119_719975	LNPCJFT1_08_l500.fa-k119_719975	IS10L_IS4_IS10	tet(B)	IS10L_IS4_IS10-tet(B)	3558	0	1	1	0
LNPCJFT2_01	Broiler faeces	Chicken	Farm	Liaoning 1	Liaoning	k119_462762	LNPCJFT2_01_l500.fa-k119_462762	IS10L_IS4_IS10	tet(B)	IS10L_IS4_IS10-tet(B)	4078	0	1	1	0
LNPCJFT2_10	Broiler faeces	Chicken	Farm	Liaoning 1	Liaoning	k119_619860	LNPCJFT2_10_l500.fa-k119_619860	IS10L_IS4_IS10	tet(B)	IS10L_IS4_IS10-tet(B)	4078	0	1	1	0
LNPCJFT2_17	Broiler faeces	Chicken	Farm	Liaoning 1	Liaoning	k119_2137	LNPCJFT2_17_l500.fa-k119_2137	IS10L_IS4_IS10	tet(B)	IS10L_IS4_IS10-tet(B)	4078	0	1	1	0
LNTPJFT1_19	Broiler faeces	Chicken	Farm	Liaoning 2	Liaoning	k119_279768	LNTPJFT1_19_l500.fa-k119_279768	IS10L_IS4_IS10	tet(B)	IS10L_IS4_IS10-tet(B)	1207	0	1	1	0
LNLDDMT1-01	Barn Floor	Environment	Farm	Liaoning 3	Liaoning	k119_305025	LNLDDMT1-01_l500.fa-k119_305025	IS10L_IS4_IS10	tet(B)	IS10L_IS4_IS10-tet(B)	4078	0	1	1	0
LNLDDMT1-02	Barn Floor	Environment	Farm	Liaoning 3	Liaoning	k119_159660	LNLDDMT1-02_l500.fa-k119_159660	IS10L_IS4_IS10	tet(B)	IS10L_IS4_IS10-tet(B)	4078	0	1	1	0
LNLDDMT1-03	Barn Floor	Environment	Farm	Liaoning 3	Liaoning	k119_59043	LNLDDMT1-03_l500.fa-k119_59043	IS10L_IS4_IS10	tet(B)	IS10L_IS4_IS10-tet(B)	4078	0	1	1	0
LNLDDMT2-01	Barn Floor	Environment	Farm	Liaoning 3	Liaoning	k119_665892	LNLDDMT2-01_l500.fa-k119_665892	IS10L_IS4_IS10	tet(B)	IS10L_IS4_IS10-tet(B)	4078	0	1	1	0
LNLDDMT2-03	Barn Floor	Environment	Farm	Liaoning 3	Liaoning	k119_125907	LNLDDMT2-03_l500.fa-k119_125907	IS10L_IS4_IS10	tet(B)	IS10L_IS4_IS10-tet(B)	4078	0	1	1	0
LNLDJFT1-07	Broiler faeces	Chicken	Farm	Liaoning 3	Liaoning	k119_559867	LNLDJFT1-07_l500.fa-k119_559867	IS10L_IS4_IS10	tet(B)	IS10L_IS4_IS10-tet(B)	1207	0	1	1	0
LNLDJFT2-19	Broiler faeces	Chicken	Farm	Liaoning 3	Liaoning	k119_791419	LNLDJFT2-19_l500.fa-k119_791419	IS10L_IS4_IS10	tet(B)	IS10L_IS4_IS10-tet(B)	1207	0	1	1	0
PDJFT1S3L0101	Broiler faeces	Chicken	Farm	Shandong 1_1	Shandong	k119_286900	PDJFT1S3L0101_l500.fa-k119_286900	IS10L_IS4_IS10	tet(B)	IS10L_IS4_IS10-tet(B)	1207	0	1	1	0
PDJFT2S3L0508	Broiler faeces	Chicken	Farm	Shandong 1_1	Shandong	k119_52568	PDJFT2S3L0508_l500.fa-k119_52568	IS10L_IS4_IS10	tet(B)	IS10L_IS4_IS10-tet(B)	1207	0	1	1	0
PDJFT2S3L0609	Broiler faeces	Chicken	Farm	Shandong 1_1	Shandong	k119_138311	PDJFT2S3L0609_l500.fa-k119_138311	IS10L_IS4_IS10	tet(B)	IS10L_IS4_IS10-tet(B)	1207	0	1	1	0
PDJFT2S4L0414	Broiler faeces	Chicken	Farm	Shandong 1_1	Shandong	k119_47416	PDJFT2S4L0414_l500.fa-k119_47416	IS10L_IS4_IS10	tet(B)	IS10L_IS4_IS10-tet(B)	1207	0	1	1	0
PDJFT1S3L0609	Broiler faeces	Chicken	Farm	Shandong 1_1	Shandong	k119_205892	PDJFT1S3L0609_l500.fa-k119_205892	IS10L_IS4_IS10	tet(B)	IS10L_IS4_IS10-tet(B)	1207	0	1	1	0
PDJFT1S4L0819	Broiler faeces	Chicken	Farm	Shandong 1_1	Shandong	k119_2622	PDJFT1S4L0819_l500.fa-k119_2622	IS10L_IS4_IS10	tet(B)	IS10L_IS4_IS10-tet(B)	1207	0	1	1	0
PDJFT1S3L0202	Broiler faeces	Chicken	Farm	Shandong 1_1	Shandong	k119_378435	PDJFT1S3L0202_l500.fa-k119_378435	IS10L_IS4_IS10	tet(B)	IS10L_IS4_IS10-tet(B)	4078	0	1	1	0
PDJFL1A2	Broiler faeces	Chicken	Farm	Shandong 1_2	Shandong	k119_50565	PDJFL1A2_l500.fa-k119_50565	IS10L_IS4_IS10	tet(B)	IS10L_IS4_IS10-tet(B)	1207	0	1	1	0
PDJFL1C1	Broiler faeces	Chicken	Farm	Shandong 1_2	Shandong	k119_86076	PDJFL1C1_l500.fa-k119_86076	IS10L_IS4_IS10	tet(B)	IS10L_IS4_IS10-tet(B)	1207	0	1	1	0
PDJFL1C2	Broiler faeces	Chicken	Farm	Shandong 1_2	Shandong	k119_42438	PDJFL1C2_l500.fa-k119_42438	IS10L_IS4_IS10	tet(B)	IS10L_IS4_IS10-tet(B)	1207	0	1	1	0
PDJFL2C4	Broiler faeces	Chicken	Farm	Shandong 1_2	Shandong	k119_164533	PDJFL2C4_l500.fa-k119_164533	IS10L_IS4_IS10	tet(B)	IS10L_IS4_IS10-tet(B)	4078	0	1	1	0
PDJFL2C6	Broiler faeces	Chicken	Farm	Shandong 1_2	Shandong	k119_67374	PDJFL2C6_l500.fa-k119_67374	IS10L_IS4_IS10	tet(B)	IS10L_IS4_IS10-tet(B)	4078	0	1	1	0
PDJFL2C5	Broiler faeces	Chicken	Farm	Shandong 1_2	Shandong	k119_68006	PDJFL2C5_l500.fa-k119_68006	IS10L_IS4_IS10	tet(B)	IS10L_IS4_IS10-tet(B)	4078	0	1	1	0
PDJFL1C4	Broiler faeces	Chicken	Farm	Shandong 1_2	Shandong	k119_50633	PDJFL1C4_l500.fa-k119_50633	IS10L_IS4_IS10	tet(B)	IS10L_IS4_IS10-tet(B)	4078	0	1	1	0
SDPD1JFT1.12	Broiler faeces	Chicken	Farm	Shandong 2	Shandong	k119_156229	SDPD1JFT1.12_l500.fa-k119_156229	IS10L_IS4_IS10	tet(B)	IS10L_IS4_IS10-tet(B)	1207	0	1	1	0
SDPD3JFT2-01	Broiler faeces	Chicken	Farm	Shandong 3	Shandong	k119_11710	SDPD3JFT2-01_l500.fa-k119_11710	IS10L_IS4_IS10	tet(B)	IS10L_IS4_IS10-tet(B)	1207	0	1	1	0
SDPD3JFT2-11	Broiler faeces	Chicken	Farm	Shandong 3	Shandong	k119_183728	SDPD3JFT2-11_l500.fa-k119_183728	IS10L_IS4_IS10	tet(B)	IS10L_IS4_IS10-tet(B)	1207	0	1	1	0
SDPD3JFT2-12	Broiler faeces	Chicken	Farm	Shandong 3	Shandong	k119_125428	SDPD3JFT2-12_l500.fa-k119_125428	IS10L_IS4_IS10	tet(B)	IS10L_IS4_IS10-tet(B)	1207	0	1	1	0
SDPD4JFT1-01	Broiler faeces	Chicken	Farm	Shandong 4	Shandong	k119_32696	SDPD4JFT1-01_l500.fa-k119_32696	IS10L_IS4_IS10	tet(B)	IS10L_IS4_IS10-tet(B)	1207	0	1	1	0
SDPD4JFT1-05	Broiler faeces	Chicken	Farm	Shandong 4	Shandong	k119_233825	SDPD4JFT1-05_l500.fa-k119_233825	IS10L_IS4_IS10	tet(B)	IS10L_IS4_IS10-tet(B)	1207	0	1	1	0
SDPD4JFT2-11	Broiler faeces	Chicken	Farm	Shandong 4	Shandong	k119_745105	SDPD4JFT2-11_l500.fa-k119_745105	IS10L_IS4_IS10	tet(B)	IS10L_IS4_IS10-tet(B)	1207	0	1	1	0
SDPD4JFT2-13	Broiler faeces	Chicken	Farm	Shandong 4	Shandong	k119_781248	SDPD4JFT2-13_l500.fa-k119_781248	IS10L_IS4_IS10	tet(B)	IS10L_IS4_IS10-tet(B)	1207	0	1	1	0
SDPD4JFT1-17	Broiler faeces	Chicken	Farm	Shandong 4	Shandong	k119_688096	SDPD4JFT1-17_l500.fa-k119_688096	IS10L_IS4_IS10	tet(B)	IS10L_IS4_IS10-tet(B)	1207	0	1	1	0
SDPD4JFT1-13	Broiler faeces	Chicken	Farm	Shandong 4	Shandong	k119_568972	SDPD4JFT1-13_l500.fa-k119_568972	IS10L_IS4_IS10	tet(B)	IS10L_IS4_IS10-tet(B)	4078	0	1	1	0
SDPD4JFT1-15	Broiler faeces	Chicken	Farm	Shandong 4	Shandong	k119_422386	SDPD4JFT1-15_l500.fa-k119_422386	IS10L_IS4_IS10	tet(B)	IS10L_IS4_IS10-tet(B)	4078	0	1	1	0
SDPD4JFT1-18	Broiler faeces	Chicken	Farm	Shandong 4	Shandong	k119_630403	SDPD4JFT1-18_l500.fa-k119_630403	IS10L_IS4_IS10	tet(B)	IS10L_IS4_IS10-tet(B)	4078	0	1	1	0
SDPD4JFT2-01	Broiler faeces	Chicken	Farm	Shandong 4	Shandong	k119_178823	SDPD4JFT2-01_l500.fa-k119_178823	IS10L_IS4_IS10	tet(B)	IS10L_IS4_IS10-tet(B)	4078	0	1	1	0
SDPD4JFT2-17	Broiler faeces	Chicken	Farm	Shandong 4	Shandong	k119_856302	SDPD4JFT2-17_l500.fa-k119_856302	IS10L_IS4_IS10	tet(B)	IS10L_IS4_IS10-tet(B)	4078	0	1	1	0
SDPD4JFT2-03	Broiler faeces	Chicken	Farm	Shandong 4	Shandong	k119_494976	SDPD4JFT2-03_l500.fa-k119_494976	IS10L_IS4_IS10	tet(B)	IS10L_IS4_IS10-tet(B)	4081	0	1	1	0
HAYS1JFT1-2	Broiler faeces	Chicken	Farm	Henan 1	Henan	k119_231668	HAYS1JFT1-2_l500.fa-k119_231668	IS10R_IS4_IS10	tet(B)	IS10R_IS4_IS10-tet(B)	1207	0	1	1	0
LNLDDMT1-03	Barn Floor	Environment	Farm	Liaoning 3	Liaoning	k119_59043	LNLDDMT1-03_l500.fa-k119_59043	IS10R_IS4_IS10	tet(B)	IS10R_IS4_IS10-tet(B)	1207	0	1	1	0
LNLDJFT2-15	Broiler faeces	Chicken	Farm	Liaoning 3	Liaoning	k119_1016597	LNLDJFT2-15_l500.fa-k119_1016597	IS10R_IS4_IS10	tet(B)	IS10R_IS4_IS10-tet(B)	1207	0	1	1	0
PDJFL2C4	Broiler faeces	Chicken	Farm	Shandong 1_2	Shandong	k119_164533	PDJFL2C4_l500.fa-k119_164533	IS10R_IS4_IS10	tet(B)	IS10R_IS4_IS10-tet(B)	1207	0	1	1	0
SDPD4JFT1-15	Broiler faeces	Chicken	Farm	Shandong 4	Shandong	k119_422386	SDPD4JFT1-15_l500.fa-k119_422386	IS10R_IS4_IS10	tet(B)	IS10R_IS4_IS10-tet(B)	1207	0	1	1	0
SDPD4JFT1-18	Broiler faeces	Chicken	Farm	Shandong 4	Shandong	k119_630403	SDPD4JFT1-18_l500.fa-k119_630403	IS10R_IS4_IS10	tet(B)	IS10R_IS4_IS10-tet(B)	1207	0	1	1	0
LNPCJFT1_01	Broiler faeces	Chicken	Farm	Liaoning 1	Liaoning	k119_11031	LNPCJFT1_01_l500.fa-k119_11031	IS1133_IS3_IS3	CTX-M-65	IS1133_IS3_IS3-CTX-M-65	1942	0	1	1	0
PDJFL2C3	Broiler faeces	Chicken	Farm	Shandong 1_2	Shandong	k119_21275	PDJFL2C3_l500.fa-k119_21275	IS1133_IS3_IS3	CTX-M-65	IS1133_IS3_IS3-CTX-M-65	1942	0	1	1	0
HAYS3YMT2-2	Broiler Feather	Chicken	Farm	Henan 3	Henan	k119_1244685	HAYS3YMT2-2_l500.fa-k119_1244685	IS1168_IS5_IS5	Mef(En2)	IS1168_IS5_IS5-Mef(En2)	496	0	1	1	0
HAYS3YMT2-5	Broiler Feather	Chicken	Farm	Henan 3	Henan	k119_315339	HAYS3YMT2-5_l500.fa-k119_315339	IS1168_IS5_IS5	Mef(En2)	IS1168_IS5_IS5-Mef(En2)	496	0	1	1	0
HAYS3YMT1-03	Broiler Feather	Chicken	Farm	Henan 3	Henan	k119_654574	HAYS3YMT1-03_l500.fa-k119_654574	IS1168_IS5_IS5	Mef(En2)	IS1168_IS5_IS5-Mef(En2)	496	0	1	1	0
SDPD4JFT2-11	Broiler faeces	Chicken	Farm	Shandong 4	Shandong	k119_1045135	SDPD4JFT2-11_l500.fa-k119_1045135	IS1169_IS5_IS5	CcrA_beta-lactamase	IS1169_IS5_IS5-CcrA_beta-lactamase	14	0	1	1	0
SDPD4JFT2-13	Broiler faeces	Chicken	Farm	Shandong 4	Shandong	k119_980544	SDPD4JFT2-13_l500.fa-k119_980544	IS1169_IS5_IS5	CcrA_beta-lactamase	IS1169_IS5_IS5-CcrA_beta-lactamase	119	0	1	1	0
HAYS1JFT2-1	Broiler faeces	Chicken	Farm	Henan 1	Henan	k119_121673	HAYS1JFT2-1_l500.fa-k119_121673	IS1188_IS1380_unknown	CcrA_beta-lactamase	IS1188_IS1380_unknown-CcrA_beta-lactamase	32	0	1	1	0
HAYS1JFT2-7	Broiler faeces	Chicken	Farm	Henan 1	Henan	k119_681868	HAYS1JFT2-7_l500.fa-k119_681868	IS1188_IS1380_unknown	CcrA_beta-lactamase	IS1188_IS1380_unknown-CcrA_beta-lactamase	32	0	1	1	0
HAYS1JFT1-2	Broiler faeces	Chicken	Farm	Henan 1	Henan	k119_21411	HAYS1JFT1-2_l500.fa-k119_21411	IS1194_IS5_IS5	FosB3	IS1194_IS5_IS5-FosB3	410	0	1	1	0
LNPCJFT2_11	Broiler faeces	Chicken	Farm	Liaoning 1	Liaoning	k119_327067	LNPCJFT2_11_l500.fa-k119_327067	IS1194_IS5_IS5	FosB3	IS1194_IS5_IS5-FosB3	410	0	1	1	0
LNPCJFT2_03	Broiler faeces	Chicken	Farm	Liaoning 1	Liaoning	k119_221664	LNPCJFT2_03_l500.fa-k119_221664	IS1194_IS5_IS5	FosB3	IS1194_IS5_IS5-FosB3	410	0	1	1	0
PDJFL2A2	Broiler faeces	Chicken	Farm	Shandong 1_2	Shandong	k119_81535	PDJFL2A2_l500.fa-k119_81535	IS1194_IS5_IS5	FosB3	IS1194_IS5_IS5-FosB3	1409	0	1	1	0
SDPD3JFT1-19	Broiler faeces	Chicken	Farm	Shandong 3	Shandong	k119_107407	SDPD3JFT1-19_l500.fa-k119_107407	IS1194_IS5_IS5	FosB3	IS1194_IS5_IS5-FosB3	410	0	1	1	0
SDPD4HCT1-02	Barn Floor	Environment	Farm	Shandong 4	Shandong	k119_260182	SDPD4HCT1-02_l500.fa-k119_260182	IS1216_IS6_unknown	APH(2'')-IIIa	IS1216_IS6_unknown-APH(2'')-IIIa	207	0	1	1	0
SDPD4HCT2-03	Barn Floor	Environment	Farm	Shandong 4	Shandong	k119_733605	SDPD4HCT2-03_l500.fa-k119_733605	IS1216_IS6_unknown	APH(2'')-IIIa	IS1216_IS6_unknown-APH(2'')-IIIa	207	0	1	1	0
LNLDJFT2-02	Broiler faeces	Chicken	Farm	Liaoning 3	Liaoning	k119_401952	LNLDJFT2-02_l500.fa-k119_401952	IS1216_IS6_unknown	cfrA	IS1216_IS6_unknown-cfrA	949	0	1	1	0
LNLDJFT2-13	Broiler faeces	Chicken	Farm	Liaoning 3	Liaoning	k119_191845	LNLDJFT2-13_l500.fa-k119_191845	IS1216_IS6_unknown	cfrA	IS1216_IS6_unknown-cfrA	949	0	1	1	0
LNLDJFT1-03	Broiler faeces	Chicken	Farm	Liaoning 3	Liaoning	k119_502470	LNLDJFT1-03_l500.fa-k119_502470	IS1216_IS6_unknown	cfrA	IS1216_IS6_unknown-cfrA	3477	0	1	1	0
LNLDJFT2-06	Broiler faeces	Chicken	Farm	Liaoning 3	Liaoning	k119_701413	LNLDJFT2-06_l500.fa-k119_701413	IS1216_IS6_unknown	emtA	IS1216_IS6_unknown-emtA	574	0	1	1	0
SDPD1JFT1.10	Broiler faeces	Chicken	Farm	Shandong 2	Shandong	k119_108148	SDPD1JFT1.10_l500.fa-k119_108148	IS1216_IS6_unknown	emtA	IS1216_IS6_unknown-emtA	2352	0	1	1	0
SDPD1JFT1.06	Broiler faeces	Chicken	Farm	Shandong 2	Shandong	k119_376308	SDPD1JFT1.06_l500.fa-k119_376308	IS1216_IS6_unknown	emtA	IS1216_IS6_unknown-emtA	2352	0	1	1	0
HAYS1JFT1-3	Broiler faeces	Chicken	Farm	Henan 1	Henan	k119_157850	HAYS1JFT1-3_l500.fa-k119_157850	IS1216_IS6_unknown	FosB3	IS1216_IS6_unknown-FosB3	1930	0	1	1	0
HAYS3JFT1-8	Broiler faeces	Chicken	Farm	Henan 3	Henan	k119_513606	HAYS3JFT1-8_l500.fa-k119_513606	IS1216_IS6_unknown	FosB3	IS1216_IS6_unknown-FosB3	219	0	1	1	0
LNTPJFT2_11	Broiler faeces	Chicken	Farm	Liaoning 2	Liaoning	k119_83209	LNTPJFT2_11_l500.fa-k119_83209	IS1216_IS6_unknown	FosB3	IS1216_IS6_unknown-FosB3	494	0	1	1	0
HAYS2JFT2-14	Broiler faeces	Chicken	Farm	Henan 2	Henan	k119_349668	HAYS2JFT2-14_l500.fa-k119_349668	IS1216_IS6_unknown	optrA	IS1216_IS6_unknown-optrA	430	0	1	1	0
HAYS2JFT2-6	Broiler faeces	Chicken	Farm	Henan 2	Henan	k119_152623	HAYS2JFT2-6_l500.fa-k119_152623	IS1216_IS6_unknown	optrA	IS1216_IS6_unknown-optrA	430	0	1	1	0
HAYS2JFT2-11	Broiler faeces	Chicken	Farm	Henan 2	Henan	k119_20071	HAYS2JFT2-11_l500.fa-k119_20071	IS1216_IS6_unknown	optrA	IS1216_IS6_unknown-optrA	2201	0	1	1	0
HAYS3JFT1-1	Broiler faeces	Chicken	Farm	Henan 3	Henan	k119_12531	HAYS3JFT1-1_l500.fa-k119_12531	IS1216_IS6_unknown	optrA	IS1216_IS6_unknown-optrA	2334	0	1	1	0
LNPCJFT1_12	Broiler faeces	Chicken	Farm	Liaoning 1	Liaoning	k119_29066	LNPCJFT1_12_l500.fa-k119_29066	IS1216_IS6_unknown	optrA	IS1216_IS6_unknown-optrA	406	0	1	1	0
LNPCJFT2_03	Broiler faeces	Chicken	Farm	Liaoning 1	Liaoning	k119_103725	LNPCJFT2_03_l500.fa-k119_103725	IS1216_IS6_unknown	optrA	IS1216_IS6_unknown-optrA	430	0	1	1	0
LNPCJFT2_10	Broiler faeces	Chicken	Farm	Liaoning 1	Liaoning	k119_472981	LNPCJFT2_10_l500.fa-k119_472981	IS1216_IS6_unknown	optrA	IS1216_IS6_unknown-optrA	430	0	1	1	0
LNPCJFT2_05	Broiler faeces	Chicken	Farm	Liaoning 1	Liaoning	k119_71505	LNPCJFT2_05_l500.fa-k119_71505	IS1216_IS6_unknown	optrA	IS1216_IS6_unknown-optrA	2265	0	1	1	0
LNPCJFT1_01	Broiler faeces	Chicken	Farm	Liaoning 1	Liaoning	k119_17739	LNPCJFT1_01_l500.fa-k119_17739	IS1216_IS6_unknown	optrA	IS1216_IS6_unknown-optrA	2265	0	1	1	0
LNPCJFT2_07	Broiler faeces	Chicken	Farm	Liaoning 1	Liaoning	k119_247015	LNPCJFT2_07_l500.fa-k119_247015	IS1216_IS6_unknown	optrA	IS1216_IS6_unknown-optrA	2265	0	1	1	0
LNPCJFT2_09	Broiler faeces	Chicken	Farm	Liaoning 1	Liaoning	k119_475929	LNPCJFT2_09_l500.fa-k119_475929	IS1216_IS6_unknown	optrA	IS1216_IS6_unknown-optrA	2265	0	1	1	0
LNTPJFT2_17	Broiler faeces	Chicken	Farm	Liaoning 2	Liaoning	k119_455516	LNTPJFT2_17_l500.fa-k119_455516	IS1216_IS6_unknown	optrA	IS1216_IS6_unknown-optrA	430	0	1	1	0
PDJFL1C1	Broiler faeces	Chicken	Farm	Shandong 1_2	Shandong	k119_110912	PDJFL1C1_l500.fa-k119_110912	IS1216_IS6_unknown	optrA	IS1216_IS6_unknown-optrA	430	0	1	1	0
PDJFL2A1	Broiler faeces	Chicken	Farm	Shandong 1_2	Shandong	k119_196334	PDJFL2A1_l500.fa-k119_196334	IS1216_IS6_unknown	optrA	IS1216_IS6_unknown-optrA	430	0	1	1	0
PDJFL2C5	Broiler faeces	Chicken	Farm	Shandong 1_2	Shandong	k119_369408	PDJFL2C5_l500.fa-k119_369408	IS1216_IS6_unknown	optrA	IS1216_IS6_unknown-optrA	430	0	1	1	0
PDJFL2C6	Broiler faeces	Chicken	Farm	Shandong 1_2	Shandong	k119_72449	PDJFL2C6_l500.fa-k119_72449	IS1216_IS6_unknown	optrA	IS1216_IS6_unknown-optrA	430	0	1	1	0
PDJFL2C4	Broiler faeces	Chicken	Farm	Shandong 1_2	Shandong	k119_46683	PDJFL2C4_l500.fa-k119_46683	IS1216_IS6_unknown	optrA	IS1216_IS6_unknown-optrA	430	0	1	1	0
PDJFL1A3	Broiler faeces	Chicken	Farm	Shandong 1_2	Shandong	k119_71333	PDJFL1A3_l500.fa-k119_71333	IS1216_IS6_unknown	optrA	IS1216_IS6_unknown-optrA	2700	0	1	1	0
PDJFL1C4	Broiler faeces	Chicken	Farm	Shandong 1_2	Shandong	k119_7457	PDJFL1C4_l500.fa-k119_7457	IS1216_IS6_unknown	optrA	IS1216_IS6_unknown-optrA	4569	0	1	1	0
SDPD1JFT1.01	Broiler faeces	Chicken	Farm	Shandong 2	Shandong	k119_364007	SDPD1JFT1.01_l500.fa-k119_364007	IS1216_IS6_unknown	optrA	IS1216_IS6_unknown-optrA	1542	0	1	1	0
SDPD1JFT1.03	Broiler faeces	Chicken	Farm	Shandong 2	Shandong	k119_337823	SDPD1JFT1.03_l500.fa-k119_337823	IS1216_IS6_unknown	optrA	IS1216_IS6_unknown-optrA	1542	0	1	1	0
SDPD1JFT1.10	Broiler faeces	Chicken	Farm	Shandong 2	Shandong	k119_1066	SDPD1JFT1.10_l500.fa-k119_1066	IS1216_IS6_unknown	optrA	IS1216_IS6_unknown-optrA	2700	0	1	1	0
SDPD1JFT1.06	Broiler faeces	Chicken	Farm	Shandong 2	Shandong	k119_199178	SDPD1JFT1.06_l500.fa-k119_199178	IS1216_IS6_unknown	optrA	IS1216_IS6_unknown-optrA	2700	0	1	1	0
SDPD1JFT1.11	Broiler faeces	Chicken	Farm	Shandong 2	Shandong	k119_709313	SDPD1JFT1.11_l500.fa-k119_709313	IS1216_IS6_unknown	optrA	IS1216_IS6_unknown-optrA	4569	0	1	1	0
SDPD1YMT2.05	Broiler Feather	Chicken	Farm	Shandong 2	Shandong	k119_664591	SDPD1YMT2.05_l500.fa-k119_664591	IS1216_IS6_unknown	optrA	IS1216_IS6_unknown-optrA	15	0	1	1	0
SDPD3JFT1-03	Broiler faeces	Chicken	Farm	Shandong 3	Shandong	k119_67761	SDPD3JFT1-03_l500.fa-k119_67761	IS1216_IS6_unknown	optrA	IS1216_IS6_unknown-optrA	2265	0	1	1	0
SDPD3JFT1-09	Broiler faeces	Chicken	Farm	Shandong 3	Shandong	k119_535	SDPD3JFT1-09_l500.fa-k119_535	IS1216_IS6_unknown	optrA	IS1216_IS6_unknown-optrA	2265	0	1	1	0
SDPD3JFT1-20	Broiler faeces	Chicken	Farm	Shandong 3	Shandong	k119_113191	SDPD3JFT1-20_l500.fa-k119_113191	IS1216_IS6_unknown	optrA	IS1216_IS6_unknown-optrA	2265	0	1	1	0
SDPD3JFT2-07	Broiler faeces	Chicken	Farm	Shandong 3	Shandong	k119_119511	SDPD3JFT2-07_l500.fa-k119_119511	IS1216_IS6_unknown	optrA	IS1216_IS6_unknown-optrA	2334	0	1	1	0
HAYS1JFT1-6	Broiler faeces	Chicken	Farm	Henan 1	Henan	k119_90946	HAYS1JFT1-6_l500.fa-k119_90946	IS1216_IS6_unknown	tetS	IS1216_IS6_unknown-tetS	756	0	1	1	0
HAYS1JFT1-2	Broiler faeces	Chicken	Farm	Henan 1	Henan	k119_46169	HAYS1JFT1-2_l500.fa-k119_46169	IS1216_IS6_unknown	tetS	IS1216_IS6_unknown-tetS	1057	0	1	1	0
HAYS1TWT3-3	Wastewater	Environment	Slaughterhouse	Henan 1	Henan	k119_1882871	HAYS1TWT3-3_l500.fa-k119_1882871	IS1216_IS6_unknown	tetS	IS1216_IS6_unknown-tetS	1057	0	1	1	0
HAYS2JTT3-11	Broiler carcass	Chicken	Slaughterhouse	Henan 2	Henan	k119_190734	HAYS2JTT3-11_l500.fa-k119_190734	IS1216_IS6_unknown	tetS	IS1216_IS6_unknown-tetS	1057	0	1	1	0
HAYS2YMT1-4	Broiler Feather	Chicken	Farm	Henan 2	Henan	k119_860651	HAYS2YMT1-4_l500.fa-k119_860651	IS1216_IS6_unknown	tetS	IS1216_IS6_unknown-tetS	723	0	1	1	0
HAYS2TWT3-2	Wastewater	Environment	Slaughterhouse	Henan 2	Henan	k119_636041	HAYS2TWT3-2_l500.fa-k119_636041	IS1216_IS6_unknown	tetS	IS1216_IS6_unknown-tetS	1057	0	1	1	0
HAYS2TWT3-3	Wastewater	Environment	Slaughterhouse	Henan 2	Henan	k119_1041186	HAYS2TWT3-3_l500.fa-k119_1041186	IS1216_IS6_unknown	tetS	IS1216_IS6_unknown-tetS	1057	0	1	1	0
HAYS3HCT2-1	Barn Floor	Environment	Farm	Henan 3	Henan	k119_171585	HAYS3HCT2-1_l500.fa-k119_171585	IS1216_IS6_unknown	tetS	IS1216_IS6_unknown-tetS	1057	0	1	1	0
HAYS3JTT3-11	Broiler carcass	Chicken	Slaughterhouse	Henan 3	Henan	k119_212989	HAYS3JTT3-11_l500.fa-k119_212989	IS1216_IS6_unknown	tetS	IS1216_IS6_unknown-tetS	1057	0	1	1	0
HAYS3JFT2-11	Broiler faeces	Chicken	Farm	Henan 3	Henan	k119_229193	HAYS3JFT2-11_l500.fa-k119_229193	IS1216_IS6_unknown	tetS	IS1216_IS6_unknown-tetS	1057	0	1	1	0
HAYS3HJT3-2	Processing Line	Environment	Slaughterhouse	Henan 3	Henan	k119_431999	HAYS3HJT3-2_l500.fa-k119_431999	IS1216_IS6_unknown	tetS	IS1216_IS6_unknown-tetS	526	0	1	1	0
HAYS3TWT3-2	Wastewater	Environment	Slaughterhouse	Henan 3	Henan	k119_565731	HAYS3TWT3-2_l500.fa-k119_565731	IS1216_IS6_unknown	tetS	IS1216_IS6_unknown-tetS	1057	0	1	1	0
HAYS3TWT3-3	Wastewater	Environment	Slaughterhouse	Henan 3	Henan	k119_452285	HAYS3TWT3-3_l500.fa-k119_452285	IS1216_IS6_unknown	tetS	IS1216_IS6_unknown-tetS	1057	0	1	1	0
HAYS3TWT3-4	Wastewater	Environment	Slaughterhouse	Henan 3	Henan	k119_576059	HAYS3TWT3-4_l500.fa-k119_576059	IS1216_IS6_unknown	tetS	IS1216_IS6_unknown-tetS	1057	0	1	1	0
LNPCDMT1_05	Barn Floor	Environment	Farm	Liaoning 1	Liaoning	k119_931392	LNPCDMT1_05_l500.fa-k119_931392	IS1216_IS6_unknown	tetS	IS1216_IS6_unknown-tetS	1057	0	1	1	0
LNPCDMT2_01	Barn Floor	Environment	Farm	Liaoning 1	Liaoning	k119_146480	LNPCDMT2_01_l500.fa-k119_146480	IS1216_IS6_unknown	tetS	IS1216_IS6_unknown-tetS	1057	0	1	1	0
LNPCDMT2_03	Barn Floor	Environment	Farm	Liaoning 1	Liaoning	k119_224195	LNPCDMT2_03_l500.fa-k119_224195	IS1216_IS6_unknown	tetS	IS1216_IS6_unknown-tetS	1057	0	1	1	0
LNPCJFT1_03	Broiler faeces	Chicken	Farm	Liaoning 1	Liaoning	k119_644571	LNPCJFT1_03_l500.fa-k119_644571	IS1216_IS6_unknown	tetS	IS1216_IS6_unknown-tetS	1057	0	1	1	0
LNPCJFT1_08	Broiler faeces	Chicken	Farm	Liaoning 1	Liaoning	k119_569249	LNPCJFT1_08_l500.fa-k119_569249	IS1216_IS6_unknown	tetS	IS1216_IS6_unknown-tetS	1057	0	1	1	0
LNPCJFT1_10	Broiler faeces	Chicken	Farm	Liaoning 1	Liaoning	k119_76890	LNPCJFT1_10_l500.fa-k119_76890	IS1216_IS6_unknown	tetS	IS1216_IS6_unknown-tetS	1057	0	1	1	0
LNTPDMT1_01	Barn Floor	Environment	Farm	Liaoning 2	Liaoning	k119_420111	LNTPDMT1_01_l500.fa-k119_420111	IS1216_IS6_unknown	tetS	IS1216_IS6_unknown-tetS	1057	0	1	1	0
LNTPDMT1_02	Barn Floor	Environment	Farm	Liaoning 2	Liaoning	k119_876394	LNTPDMT1_02_l500.fa-k119_876394	IS1216_IS6_unknown	tetS	IS1216_IS6_unknown-tetS	1057	0	1	1	0
LNTPDMT1_03	Barn Floor	Environment	Farm	Liaoning 2	Liaoning	k119_97648	LNTPDMT1_03_l500.fa-k119_97648	IS1216_IS6_unknown	tetS	IS1216_IS6_unknown-tetS	1057	0	1	1	0
LNLDJFT1-14	Broiler faeces	Chicken	Farm	Liaoning 3	Liaoning	k119_247324	LNLDJFT1-14_l500.fa-k119_247324	IS1216_IS6_unknown	tetS	IS1216_IS6_unknown-tetS	78	0	1	1	0
LNLDJFT2-11	Broiler faeces	Chicken	Farm	Liaoning 3	Liaoning	k119_299675	LNLDJFT2-11_l500.fa-k119_299675	IS1216_IS6_unknown	tetS	IS1216_IS6_unknown-tetS	1057	0	1	1	0
LNLHHJT3-1	Processing Line	Environment	Slaughterhouse	Liaoning 3	Liaoning	k119_772	LNLHHJT3-1_l500.fa-k119_772	IS1216_IS6_unknown	tetS	IS1216_IS6_unknown-tetS	1836	0	1	1	0
LNLHTWT3-2	Wastewater	Environment	Slaughterhouse	Liaoning 3	Liaoning	k119_85564	LNLHTWT3-2_l500.fa-k119_85564	IS1216_IS6_unknown	tetS	IS1216_IS6_unknown-tetS	747	0	1	1	0
SDPD1JFT1.12	Broiler faeces	Chicken	Farm	Shandong 2	Shandong	k119_221804	SDPD1JFT1.12_l500.fa-k119_221804	IS1216_IS6_unknown	tetS	IS1216_IS6_unknown-tetS	1057	0	1	1	0
SDPD3HCT2-02	Barn Floor	Environment	Farm	Shandong 3	Shandong	k119_1493247	SDPD3HCT2-02_l500.fa-k119_1493247	IS1216_IS6_unknown	tetS	IS1216_IS6_unknown-tetS	1057	0	1	1	0
SDPD3TWT3-01	Wastewater	Environment	Slaughterhouse	Shandong 3	Shandong	k119_562268	SDPD3TWT3-01_l500.fa-k119_562268	IS1216_IS6_unknown	tetS	IS1216_IS6_unknown-tetS	1057	0	1	1	0
SDPD4HCT1-01	Barn Floor	Environment	Farm	Shandong 4	Shandong	k119_1335238	SDPD4HCT1-01_l500.fa-k119_1335238	IS1216_IS6_unknown	tetS	IS1216_IS6_unknown-tetS	1057	0	1	1	0
SDPD4HCT1-02	Barn Floor	Environment	Farm	Shandong 4	Shandong	k119_401620	SDPD4HCT1-02_l500.fa-k119_401620	IS1216_IS6_unknown	tetS	IS1216_IS6_unknown-tetS	1057	0	1	1	0
SDPD4HCT2-01	Barn Floor	Environment	Farm	Shandong 4	Shandong	k119_1039251	SDPD4HCT2-01_l500.fa-k119_1039251	IS1216_IS6_unknown	tetS	IS1216_IS6_unknown-tetS	1057	0	1	1	0
SDPD4HCT2-02	Barn Floor	Environment	Farm	Shandong 4	Shandong	k119_1460848	SDPD4HCT2-02_l500.fa-k119_1460848	IS1216_IS6_unknown	tetS	IS1216_IS6_unknown-tetS	1057	0	1	1	0
SDPD4HCT1-03	Barn Floor	Environment	Farm	Shandong 4	Shandong	k119_321437	SDPD4HCT1-03_l500.fa-k119_321437	IS1216_IS6_unknown	tetS	IS1216_IS6_unknown-tetS	1835	0	1	1	0
SDPD4JFT1-08	Broiler faeces	Chicken	Farm	Shandong 4	Shandong	k119_27209	SDPD4JFT1-08_l500.fa-k119_27209	IS1216_IS6_unknown	tetS	IS1216_IS6_unknown-tetS	1057	0	1	1	0
SDPD4JFT1-18	Broiler faeces	Chicken	Farm	Shandong 4	Shandong	k119_680486	SDPD4JFT1-18_l500.fa-k119_680486	IS1216_IS6_unknown	tetS	IS1216_IS6_unknown-tetS	1057	0	1	1	0
SDPD4JFT1-17	Broiler faeces	Chicken	Farm	Shandong 4	Shandong	k119_332894	SDPD4JFT1-17_l500.fa-k119_332894	IS1216_IS6_unknown	tetS	IS1216_IS6_unknown-tetS	1834	0	1	1	0
SDPD4JFT1-05	Broiler faeces	Chicken	Farm	Shandong 4	Shandong	k119_194274	SDPD4JFT1-05_l500.fa-k119_194274	IS1216_IS6_unknown	tetS	IS1216_IS6_unknown-tetS	1835	0	1	1	0
SDPD4YMT1-02	Broiler Feather	Chicken	Farm	Shandong 4	Shandong	k119_525819	SDPD4YMT1-02_l500.fa-k119_525819	IS1216_IS6_unknown	tetS	IS1216_IS6_unknown-tetS	1057	0	1	1	0
SDPD4YMT1-05	Broiler Feather	Chicken	Farm	Shandong 4	Shandong	k119_568854	SDPD4YMT1-05_l500.fa-k119_568854	IS1216_IS6_unknown	tetS	IS1216_IS6_unknown-tetS	1835	0	1	1	0
SDPD4YMT1-04	Broiler Feather	Chicken	Farm	Shandong 4	Shandong	k119_1200370	SDPD4YMT1-04_l500.fa-k119_1200370	IS1216_IS6_unknown	tetS	IS1216_IS6_unknown-tetS	1835	0	1	1	0
SDPD4HCT2-03	Barn Floor	Environment	Farm	Shandong 4	Shandong	k119_466399	SDPD4HCT2-03_l500.fa-k119_466399	IS1216E_IS6_unknown	tetS	IS1216E_IS6_unknown-tetS	1871	0	1	1	0
SDPD4JFT2-11	Broiler faeces	Chicken	Farm	Shandong 4	Shandong	k119_27968	SDPD4JFT2-11_l500.fa-k119_27968	IS1216E_IS6_unknown	tetS	IS1216E_IS6_unknown-tetS	901	0	1	1	0
HAYS1JFT1-3	Broiler faeces	Chicken	Farm	Henan 1	Henan	k119_225223	HAYS1JFT1-3_l500.fa-k119_225223	IS1230B_IS3_IS3	oqxA	IS1230B_IS3_IS3-oqxA	3614	0	1	1	0
HAYS1JFT1-5	Broiler faeces	Chicken	Farm	Henan 1	Henan	k119_312820	HAYS1JFT1-5_l500.fa-k119_312820	IS1230B_IS3_IS3	oqxA	IS1230B_IS3_IS3-oqxA	3614	0	1	1	0
HAYS1JFT1-5	Broiler faeces	Chicken	Farm	Henan 1	Henan	k119_312820	HAYS1JFT1-5_l500.fa-k119_312820	IS1230B_IS3_IS3	oqxB	IS1230B_IS3_IS3-oqxB	4813	0	1	1	0
HAYS1JFT1-3	Broiler faeces	Chicken	Farm	Henan 1	Henan	k119_225223	HAYS1JFT1-3_l500.fa-k119_225223	IS1230B_IS3_IS3	oqxB	IS1230B_IS3_IS3-oqxB	4813	0	1	1	0
HAYS1JFT1-2	Broiler faeces	Chicken	Farm	Henan 1	Henan	k119_83677	HAYS1JFT1-2_l500.fa-k119_83677	IS1247_IS1380_unknown	AAC(6')-IIc	IS1247_IS1380_unknown-AAC(6')-IIc	394	0	1	1	0
LNLDDMT1-02	Barn Floor	Environment	Farm	Liaoning 3	Liaoning	k119_339223	LNLDDMT1-02_l500.fa-k119_339223	IS1247_IS1380_unknown	AAC(6')-IIc	IS1247_IS1380_unknown-AAC(6')-IIc	394	0	1	1	0
LNPCDMT1_05	Barn Floor	Environment	Farm	Liaoning 1	Liaoning	k119_991192	LNPCDMT1_05_l500.fa-k119_991192	IS1247_IS1380_unknown	tet(G)	IS1247_IS1380_unknown-tet(G)	1635	0	1	1	0
LNPCDMT2_03	Barn Floor	Environment	Farm	Liaoning 1	Liaoning	k119_753523	LNPCDMT2_03_l500.fa-k119_753523	IS1247_IS1380_unknown	tet(G)	IS1247_IS1380_unknown-tet(G)	1635	0	1	1	0
HAYS2JFT2-8	Broiler faeces	Chicken	Farm	Henan 2	Henan	k119_28448	HAYS2JFT2-8_l500.fa-k119_28448	IS1294_IS91_unknown	CTX-M-64	IS1294_IS91_unknown-CTX-M-64	284	0	1	1	0
HAYS2JFT2-13	Broiler faeces	Chicken	Farm	Henan 2	Henan	k119_398236	HAYS2JFT2-13_l500.fa-k119_398236	IS1294_IS91_unknown	CTX-M-64	IS1294_IS91_unknown-CTX-M-64	419	0	1	1	0
HAYS2JFT2-4	Broiler faeces	Chicken	Farm	Henan 2	Henan	k119_545983	HAYS2JFT2-4_l500.fa-k119_545983	IS1294_IS91_unknown	CTX-M-64	IS1294_IS91_unknown-CTX-M-64	419	0	1	1	0
HAYS1JFT1-1	Broiler faeces	Chicken	Farm	Henan 1	Henan	k119_29868	HAYS1JFT1-1_l500.fa-k119_29868	IS1294_IS91_unknown	oqxA	IS1294_IS91_unknown-oqxA	4542	0	1	1	0
SDPD1JFT1.10	Broiler faeces	Chicken	Farm	Shandong 2	Shandong	k119_168594	SDPD1JFT1.10_l500.fa-k119_168594	IS1294_IS91_unknown	oqxA	IS1294_IS91_unknown-oqxA	4044	0	1	1	0
PDJFT2S4L0820	Broiler faeces	Chicken	Farm	Shandong 1_1	Shandong	k119_121219	PDJFT2S4L0820_l500.fa-k119_121219	IS1294_IS91_unknown	rmtB	IS1294_IS91_unknown-rmtB	2454	0	1	1	0
PDJFL2C1	Broiler faeces	Chicken	Farm	Shandong 1_2	Shandong	k119_475947	PDJFL2C1_l500.fa-k119_475947	IS1294_IS91_unknown	rmtB	IS1294_IS91_unknown-rmtB	1722	0	1	1	0
PDJFL2C2	Broiler faeces	Chicken	Farm	Shandong 1_2	Shandong	k119_65025	PDJFL2C2_l500.fa-k119_65025	IS1294_IS91_unknown	rmtB	IS1294_IS91_unknown-rmtB	2454	0	1	1	0
HAYS2JFT2-6	Broiler faeces	Chicken	Farm	Henan 2	Henan	k119_165040	HAYS2JFT2-6_l500.fa-k119_165040	IS1326_IS21_unknown	sul1	IS1326_IS21_unknown-sul1	737	0	1	1	0
HAYS2JFT2-8	Broiler faeces	Chicken	Farm	Henan 2	Henan	k119_313545	HAYS2JFT2-8_l500.fa-k119_313545	IS1326_IS21_unknown	sul1	IS1326_IS21_unknown-sul1	737	0	1	1	0
LNPCJFT1_11	Broiler faeces	Chicken	Farm	Liaoning 1	Liaoning	k119_5753	LNPCJFT1_11_l500.fa-k119_5753	IS1326_IS21_unknown	sul1	IS1326_IS21_unknown-sul1	737	0	1	1	0
LNPCJFT1_01	Broiler faeces	Chicken	Farm	Liaoning 1	Liaoning	k119_22806	LNPCJFT1_01_l500.fa-k119_22806	IS1326_IS21_unknown	sul1	IS1326_IS21_unknown-sul1	737	0	1	1	0
LNTPDMT1_02	Barn Floor	Environment	Farm	Liaoning 2	Liaoning	k119_311557	LNTPDMT1_02_l500.fa-k119_311557	IS1326_IS21_unknown	sul1	IS1326_IS21_unknown-sul1	737	0	1	1	0
LNTPDMT1_03	Barn Floor	Environment	Farm	Liaoning 2	Liaoning	k119_123005	LNTPDMT1_03_l500.fa-k119_123005	IS1326_IS21_unknown	sul1	IS1326_IS21_unknown-sul1	737	0	1	1	0
PDJFT2S4L0212	Broiler faeces	Chicken	Farm	Shandong 1_1	Shandong	k119_10721	PDJFT2S4L0212_l500.fa-k119_10721	IS1326_IS21_unknown	sul1	IS1326_IS21_unknown-sul1	737	0	1	1	0
SDPD3JFT1-03	Broiler faeces	Chicken	Farm	Shandong 3	Shandong	k119_128632	SDPD3JFT1-03_l500.fa-k119_128632	IS1326_IS21_unknown	sul1	IS1326_IS21_unknown-sul1	737	0	1	1	0
SDPD3JFT1-19	Broiler faeces	Chicken	Farm	Shandong 3	Shandong	k119_113051	SDPD3JFT1-19_l500.fa-k119_113051	IS1326_IS21_unknown	sul1	IS1326_IS21_unknown-sul1	737	0	1	1	0
LNPCJFT2_10	Broiler faeces	Chicken	Farm	Liaoning 1	Liaoning	k119_254907	LNPCJFT2_10_l500.fa-k119_254907	IS1396_ISL3_unknown	cmx	IS1396_ISL3_unknown-cmx	985	0	1	1	0
LNLDJFT1-02	Broiler faeces	Chicken	Farm	Liaoning 3	Liaoning	k119_195377	LNLDJFT1-02_l500.fa-k119_195377	IS1396_ISL3_unknown	cmx	IS1396_ISL3_unknown-cmx	985	0	1	1	0
SDPD1JFT1.14	Broiler faeces	Chicken	Farm	Shandong 2	Shandong	k119_679646	SDPD1JFT1.14_l500.fa-k119_679646	IS1396_ISL3_unknown	cmx	IS1396_ISL3_unknown-cmx	985	0	1	1	0
LNPCJFT2_19	Broiler faeces	Chicken	Farm	Liaoning 1	Liaoning	k119_51930	LNPCJFT2_19_l500.fa-k119_51930	IS1396_ISL3_unknown	dfrA27	IS1396_ISL3_unknown-dfrA27	137	0	1	1	0
SDPD4JFT1-01	Broiler faeces	Chicken	Farm	Shandong 4	Shandong	k119_503361	SDPD4JFT1-01_l500.fa-k119_503361	IS1396_ISL3_unknown	dfrA27	IS1396_ISL3_unknown-dfrA27	137	0	1	1	0
LNPCDMT1_05	Barn Floor	Environment	Farm	Liaoning 1	Liaoning	k119_1393727	LNPCDMT1_05_l500.fa-k119_1393727	IS1396_ISL3_unknown	lnuG	IS1396_ISL3_unknown-lnuG	131	0	1	1	0
LNPCJFT1_10	Broiler faeces	Chicken	Farm	Liaoning 1	Liaoning	k119_2294	LNPCJFT1_10_l500.fa-k119_2294	IS1396_ISL3_unknown	lnuG	IS1396_ISL3_unknown-lnuG	131	0	1	1	0
LNPCJFT2_03	Broiler faeces	Chicken	Farm	Liaoning 1	Liaoning	k119_179238	LNPCJFT2_03_l500.fa-k119_179238	IS1396_ISL3_unknown	lnuG	IS1396_ISL3_unknown-lnuG	131	0	1	1	0
LNPCJFT2_05	Broiler faeces	Chicken	Farm	Liaoning 1	Liaoning	k119_63698	LNPCJFT2_05_l500.fa-k119_63698	IS1396_ISL3_unknown	lnuG	IS1396_ISL3_unknown-lnuG	131	0	1	1	0
LNPCJFT2_17	Broiler faeces	Chicken	Farm	Liaoning 1	Liaoning	k119_60487	LNPCJFT2_17_l500.fa-k119_60487	IS1396_ISL3_unknown	lnuG	IS1396_ISL3_unknown-lnuG	131	0	1	1	0
LNPCJFT2_18	Broiler faeces	Chicken	Farm	Liaoning 1	Liaoning	k119_128231	LNPCJFT2_18_l500.fa-k119_128231	IS1396_ISL3_unknown	lnuG	IS1396_ISL3_unknown-lnuG	131	0	1	1	0
LNPCJFT2_19	Broiler faeces	Chicken	Farm	Liaoning 1	Liaoning	k119_187608	LNPCJFT2_19_l500.fa-k119_187608	IS1396_ISL3_unknown	lnuG	IS1396_ISL3_unknown-lnuG	131	0	1	1	0
LNLDDMT1-01	Barn Floor	Environment	Farm	Liaoning 3	Liaoning	k119_196050	LNLDDMT1-01_l500.fa-k119_196050	IS1396_ISL3_unknown	lnuG	IS1396_ISL3_unknown-lnuG	131	0	1	1	0
LNLDDMT2-01	Barn Floor	Environment	Farm	Liaoning 3	Liaoning	k119_529275	LNLDDMT2-01_l500.fa-k119_529275	IS1396_ISL3_unknown	lnuG	IS1396_ISL3_unknown-lnuG	131	0	1	1	0
LNLDDMT2-02	Barn Floor	Environment	Farm	Liaoning 3	Liaoning	k119_600269	LNLDDMT2-02_l500.fa-k119_600269	IS1396_ISL3_unknown	lnuG	IS1396_ISL3_unknown-lnuG	131	0	1	1	0
LNLDDMT2-03	Barn Floor	Environment	Farm	Liaoning 3	Liaoning	k119_476371	LNLDDMT2-03_l500.fa-k119_476371	IS1396_ISL3_unknown	lnuG	IS1396_ISL3_unknown-lnuG	131	0	1	1	0
LNLDDMT1-02	Barn Floor	Environment	Farm	Liaoning 3	Liaoning	k119_243087	LNLDDMT1-02_l500.fa-k119_243087	IS1396_ISL3_unknown	lnuG	IS1396_ISL3_unknown-lnuG	131	0	1	1	0
PDJFT1S4L0212	Broiler faeces	Chicken	Farm	Shandong 1_1	Shandong	k119_394396	PDJFT1S4L0212_l500.fa-k119_394396	IS1396_ISL3_unknown	lnuG	IS1396_ISL3_unknown-lnuG	131	0	1	1	0
PDJFT1S4L0313	Broiler faeces	Chicken	Farm	Shandong 1_1	Shandong	k119_18907	PDJFT1S4L0313_l500.fa-k119_18907	IS1396_ISL3_unknown	lnuG	IS1396_ISL3_unknown-lnuG	131	0	1	1	0
PDJFT2S3L0507	Broiler faeces	Chicken	Farm	Shandong 1_1	Shandong	k119_133743	PDJFT2S3L0507_l500.fa-k119_133743	IS1396_ISL3_unknown	lnuG	IS1396_ISL3_unknown-lnuG	131	0	1	1	0
PDJFT2S3L0508	Broiler faeces	Chicken	Farm	Shandong 1_1	Shandong	k119_231938	PDJFT2S3L0508_l500.fa-k119_231938	IS1396_ISL3_unknown	lnuG	IS1396_ISL3_unknown-lnuG	131	0	1	1	0
PDJFT2S3L0610	Broiler faeces	Chicken	Farm	Shandong 1_1	Shandong	k119_72982	PDJFT2S3L0610_l500.fa-k119_72982	IS1396_ISL3_unknown	lnuG	IS1396_ISL3_unknown-lnuG	131	0	1	1	0
PDJFT2S4L0515	Broiler faeces	Chicken	Farm	Shandong 1_1	Shandong	k119_2811	PDJFT2S4L0515_l500.fa-k119_2811	IS1396_ISL3_unknown	lnuG	IS1396_ISL3_unknown-lnuG	131	0	1	1	0
PDJFT2S4L0819	Broiler faeces	Chicken	Farm	Shandong 1_1	Shandong	k119_20764	PDJFT2S4L0819_l500.fa-k119_20764	IS1396_ISL3_unknown	lnuG	IS1396_ISL3_unknown-lnuG	131	0	1	1	0
PDJFT2S3L0304	Broiler faeces	Chicken	Farm	Shandong 1_1	Shandong	k119_20753	PDJFT2S3L0304_l500.fa-k119_20753	IS1396_ISL3_unknown	lnuG	IS1396_ISL3_unknown-lnuG	131	0	1	1	0
PDJFL2C5	Broiler faeces	Chicken	Farm	Shandong 1_2	Shandong	k119_48089	PDJFL2C5_l500.fa-k119_48089	IS1396_ISL3_unknown	lnuG	IS1396_ISL3_unknown-lnuG	131	0	1	1	0
SDPD3HCT2-02	Barn Floor	Environment	Farm	Shandong 3	Shandong	k119_817646	SDPD3HCT2-02_l500.fa-k119_817646	IS1396_ISL3_unknown	lnuG	IS1396_ISL3_unknown-lnuG	131	0	1	1	0
SDPD4JFT2-03	Broiler faeces	Chicken	Farm	Shandong 4	Shandong	k119_587840	SDPD4JFT2-03_l500.fa-k119_587840	IS1396_ISL3_unknown	lnuG	IS1396_ISL3_unknown-lnuG	131	0	1	1	0
SDPD4JFT2-11	Broiler faeces	Chicken	Farm	Shandong 4	Shandong	k119_72876	SDPD4JFT2-11_l500.fa-k119_72876	IS1396_ISL3_unknown	lnuG	IS1396_ISL3_unknown-lnuG	131	0	1	1	0
SDPD4JFT2-05	Broiler faeces	Chicken	Farm	Shandong 4	Shandong	k119_432224	SDPD4JFT2-05_l500.fa-k119_432224	IS1396_ISL3_unknown	lnuG	IS1396_ISL3_unknown-lnuG	131	0	1	1	0
HAYS3JFT1-4	Broiler faeces	Chicken	Farm	Henan 3	Henan	k119_61227	HAYS3JFT1-4_l500.fa-k119_61227	IS15_IS6_unknown	aadA22	IS15_IS6_unknown-aadA22	4494	0	1	1	0
LNLDJFT1-05	Broiler faeces	Chicken	Farm	Liaoning 3	Liaoning	k119_118697	LNLDJFT1-05_l500.fa-k119_118697	IS15_IS6_unknown	aadA22	IS15_IS6_unknown-aadA22	1042	0	1	1	0
LNLDJFT2-19	Broiler faeces	Chicken	Farm	Liaoning 3	Liaoning	k119_935608	LNLDJFT2-19_l500.fa-k119_935608	IS15_IS6_unknown	APH(3')-VI	IS15_IS6_unknown-APH(3')-VI	1846	0	1	1	0
LNLDJFT2-15	Broiler faeces	Chicken	Farm	Liaoning 3	Liaoning	k119_86441	LNLDJFT2-15_l500.fa-k119_86441	IS15_IS6_unknown	APH(3')-VI	IS15_IS6_unknown-APH(3')-VI	1846	0	1	1	0
SDPD4JFT2-11	Broiler faeces	Chicken	Farm	Shandong 4	Shandong	k119_880112	SDPD4JFT2-11_l500.fa-k119_880112	IS15_IS6_unknown	APH(3')-VI	IS15_IS6_unknown-APH(3')-VI	1846	0	1	1	0
SDPD4JFT2-01	Broiler faeces	Chicken	Farm	Shandong 4	Shandong	k119_201612	SDPD4JFT2-01_l500.fa-k119_201612	IS15_IS6_unknown	APH(3')-VI	IS15_IS6_unknown-APH(3')-VI	1860	0	1	1	0
HAYS1JTT3-11	Broiler carcass	Chicken	Slaughterhouse	Henan 1	Henan	k119_14058	HAYS1JTT3-11_l500.fa-k119_14058	IS15_IS6_unknown	APH(4)-Ia	IS15_IS6_unknown-APH(4)-Ia	1055	0	1	1	0
HAYS1JTT3-6	Broiler carcass	Chicken	Slaughterhouse	Henan 1	Henan	k119_26499	HAYS1JTT3-6_l500.fa-k119_26499	IS15_IS6_unknown	APH(4)-Ia	IS15_IS6_unknown-APH(4)-Ia	1055	0	1	1	0
HAYS1JFT1-2	Broiler faeces	Chicken	Farm	Henan 1	Henan	k119_3474	HAYS1JFT1-2_l500.fa-k119_3474	IS15_IS6_unknown	APH(4)-Ia	IS15_IS6_unknown-APH(4)-Ia	1055	0	1	1	0
HAYS1JFT2-2	Broiler faeces	Chicken	Farm	Henan 1	Henan	k119_57171	HAYS1JFT2-2_l500.fa-k119_57171	IS15_IS6_unknown	APH(4)-Ia	IS15_IS6_unknown-APH(4)-Ia	1055	0	1	1	0
HAYS1JFT1-5	Broiler faeces	Chicken	Farm	Henan 1	Henan	k119_115015	HAYS1JFT1-5_l500.fa-k119_115015	IS15_IS6_unknown	APH(4)-Ia	IS15_IS6_unknown-APH(4)-Ia	1055	0	1	1	0
HAYS1JFT2-8	Broiler faeces	Chicken	Farm	Henan 1	Henan	k119_197363	HAYS1JFT2-8_l500.fa-k119_197363	IS15_IS6_unknown	APH(4)-Ia	IS15_IS6_unknown-APH(4)-Ia	1055	0	1	1	0
HAYS1JFT2-6	Broiler faeces	Chicken	Farm	Henan 1	Henan	k119_212051	HAYS1JFT2-6_l500.fa-k119_212051	IS15_IS6_unknown	APH(4)-Ia	IS15_IS6_unknown-APH(4)-Ia	1055	0	1	1	0
HAYS1JFT2-7	Broiler faeces	Chicken	Farm	Henan 1	Henan	k119_166111	HAYS1JFT2-7_l500.fa-k119_166111	IS15_IS6_unknown	APH(4)-Ia	IS15_IS6_unknown-APH(4)-Ia	1055	0	1	1	0
HAYS1JFT1-1	Broiler faeces	Chicken	Farm	Henan 1	Henan	k119_19559	HAYS1JFT1-1_l500.fa-k119_19559	IS15_IS6_unknown	APH(4)-Ia	IS15_IS6_unknown-APH(4)-Ia	1055	0	1	1	0
HAYS1JFT1-7	Broiler faeces	Chicken	Farm	Henan 1	Henan	k119_2411	HAYS1JFT1-7_l500.fa-k119_2411	IS15_IS6_unknown	APH(4)-Ia	IS15_IS6_unknown-APH(4)-Ia	1055	0	1	1	0
HAYS1JFT1-8	Broiler faeces	Chicken	Farm	Henan 1	Henan	k119_107212	HAYS1JFT1-8_l500.fa-k119_107212	IS15_IS6_unknown	APH(4)-Ia	IS15_IS6_unknown-APH(4)-Ia	1055	0	1	1	0
HAYS1JFT2-4	Broiler faeces	Chicken	Farm	Henan 1	Henan	k119_196380	HAYS1JFT2-4_l500.fa-k119_196380	IS15_IS6_unknown	APH(4)-Ia	IS15_IS6_unknown-APH(4)-Ia	1055	0	1	1	0
HAYS1JFT1-3	Broiler faeces	Chicken	Farm	Henan 1	Henan	k119_129431	HAYS1JFT1-3_l500.fa-k119_129431	IS15_IS6_unknown	APH(4)-Ia	IS15_IS6_unknown-APH(4)-Ia	1055	0	1	1	0
HAYS1JFT2-1	Broiler faeces	Chicken	Farm	Henan 1	Henan	k119_180185	HAYS1JFT2-1_l500.fa-k119_180185	IS15_IS6_unknown	APH(4)-Ia	IS15_IS6_unknown-APH(4)-Ia	1055	0	1	1	0
HAYS2JFT1-4	Broiler faeces	Chicken	Farm	Henan 2	Henan	k119_66768	HAYS2JFT1-4_l500.fa-k119_66768	IS15_IS6_unknown	APH(4)-Ia	IS15_IS6_unknown-APH(4)-Ia	1055	0	1	1	0
HAYS2JFT1-8	Broiler faeces	Chicken	Farm	Henan 2	Henan	k119_133268	HAYS2JFT1-8_l500.fa-k119_133268	IS15_IS6_unknown	APH(4)-Ia	IS15_IS6_unknown-APH(4)-Ia	1055	0	1	1	0
HAYS2JFT2-4	Broiler faeces	Chicken	Farm	Henan 2	Henan	k119_139250	HAYS2JFT2-4_l500.fa-k119_139250	IS15_IS6_unknown	APH(4)-Ia	IS15_IS6_unknown-APH(4)-Ia	1055	0	1	1	0
HAYS2JFT1-14	Broiler faeces	Chicken	Farm	Henan 2	Henan	k119_43621	HAYS2JFT1-14_l500.fa-k119_43621	IS15_IS6_unknown	APH(4)-Ia	IS15_IS6_unknown-APH(4)-Ia	1055	0	1	1	0
HAYS2JFT1-15	Broiler faeces	Chicken	Farm	Henan 2	Henan	k119_42406	HAYS2JFT1-15_l500.fa-k119_42406	IS15_IS6_unknown	APH(4)-Ia	IS15_IS6_unknown-APH(4)-Ia	1055	0	1	1	0
HAYS2JFT2-12	Broiler faeces	Chicken	Farm	Henan 2	Henan	k119_64493	HAYS2JFT2-12_l500.fa-k119_64493	IS15_IS6_unknown	APH(4)-Ia	IS15_IS6_unknown-APH(4)-Ia	1055	0	1	1	0
HAYS2JFT2-13	Broiler faeces	Chicken	Farm	Henan 2	Henan	k119_139518	HAYS2JFT2-13_l500.fa-k119_139518	IS15_IS6_unknown	APH(4)-Ia	IS15_IS6_unknown-APH(4)-Ia	1055	0	1	1	0
HAYS2JFT2-15	Broiler faeces	Chicken	Farm	Henan 2	Henan	k119_39060	HAYS2JFT2-15_l500.fa-k119_39060	IS15_IS6_unknown	APH(4)-Ia	IS15_IS6_unknown-APH(4)-Ia	1055	0	1	1	0
HAYS2JFT1-11	Broiler faeces	Chicken	Farm	Henan 2	Henan	k119_283837	HAYS2JFT1-11_l500.fa-k119_283837	IS15_IS6_unknown	APH(4)-Ia	IS15_IS6_unknown-APH(4)-Ia	1055	0	1	1	0
HAYS2JFT2-6	Broiler faeces	Chicken	Farm	Henan 2	Henan	k119_9914	HAYS2JFT2-6_l500.fa-k119_9914	IS15_IS6_unknown	APH(4)-Ia	IS15_IS6_unknown-APH(4)-Ia	1055	0	1	1	0
HAYS2JFT2-11	Broiler faeces	Chicken	Farm	Henan 2	Henan	k119_20203	HAYS2JFT2-11_l500.fa-k119_20203	IS15_IS6_unknown	APH(4)-Ia	IS15_IS6_unknown-APH(4)-Ia	1055	0	1	1	0
HAYS2JFT2-14	Broiler faeces	Chicken	Farm	Henan 2	Henan	k119_510355	HAYS2JFT2-14_l500.fa-k119_510355	IS15_IS6_unknown	APH(4)-Ia	IS15_IS6_unknown-APH(4)-Ia	1055	0	1	1	0
HAYS2JFT1-12	Broiler faeces	Chicken	Farm	Henan 2	Henan	k119_116602	HAYS2JFT1-12_l500.fa-k119_116602	IS15_IS6_unknown	APH(4)-Ia	IS15_IS6_unknown-APH(4)-Ia	1055	0	1	1	0
HAYS2YMT1-1	Broiler Feather	Chicken	Farm	Henan 2	Henan	k119_809001	HAYS2YMT1-1_l500.fa-k119_809001	IS15_IS6_unknown	APH(4)-Ia	IS15_IS6_unknown-APH(4)-Ia	1055	0	1	1	0
HAYS2YMT1-2	Broiler Feather	Chicken	Farm	Henan 2	Henan	k119_934384	HAYS2YMT1-2_l500.fa-k119_934384	IS15_IS6_unknown	APH(4)-Ia	IS15_IS6_unknown-APH(4)-Ia	1055	0	1	1	0
HAYS2YMT1-4	Broiler Feather	Chicken	Farm	Henan 2	Henan	k119_812120	HAYS2YMT1-4_l500.fa-k119_812120	IS15_IS6_unknown	APH(4)-Ia	IS15_IS6_unknown-APH(4)-Ia	1055	0	1	1	0
HAYS2YMT1-5	Broiler Feather	Chicken	Farm	Henan 2	Henan	k119_706615	HAYS2YMT1-5_l500.fa-k119_706615	IS15_IS6_unknown	APH(4)-Ia	IS15_IS6_unknown-APH(4)-Ia	1055	0	1	1	0
HAYS2YMT2-2	Broiler Feather	Chicken	Farm	Henan 2	Henan	k119_1259301	HAYS2YMT2-2_l500.fa-k119_1259301	IS15_IS6_unknown	APH(4)-Ia	IS15_IS6_unknown-APH(4)-Ia	1055	0	1	1	0
HAYS2YMT2-4	Broiler Feather	Chicken	Farm	Henan 2	Henan	k119_860398	HAYS2YMT2-4_l500.fa-k119_860398	IS15_IS6_unknown	APH(4)-Ia	IS15_IS6_unknown-APH(4)-Ia	1055	0	1	1	0
HAYS2YMT2-1	Broiler Feather	Chicken	Farm	Henan 2	Henan	k119_339693	HAYS2YMT2-1_l500.fa-k119_339693	IS15_IS6_unknown	APH(4)-Ia	IS15_IS6_unknown-APH(4)-Ia	1055	0	1	1	0
HAYS2YMT2-5	Broiler Feather	Chicken	Farm	Henan 2	Henan	k119_735378	HAYS2YMT2-5_l500.fa-k119_735378	IS15_IS6_unknown	APH(4)-Ia	IS15_IS6_unknown-APH(4)-Ia	1055	0	1	1	0
HAYS2YMT1-3	Broiler Feather	Chicken	Farm	Henan 2	Henan	k119_286612	HAYS2YMT1-3_l500.fa-k119_286612	IS15_IS6_unknown	APH(4)-Ia	IS15_IS6_unknown-APH(4)-Ia	1055	0	1	1	0
HAYS2YMT2-3	Broiler Feather	Chicken	Farm	Henan 2	Henan	k119_1138300	HAYS2YMT2-3_l500.fa-k119_1138300	IS15_IS6_unknown	APH(4)-Ia	IS15_IS6_unknown-APH(4)-Ia	1055	0	1	1	0
HAYS3HCT2-2	Barn Floor	Environment	Farm	Henan 3	Henan	k119_987418	HAYS3HCT2-2_l500.fa-k119_987418	IS15_IS6_unknown	APH(4)-Ia	IS15_IS6_unknown-APH(4)-Ia	1055	0	1	1	0
HAYS3HCT2-1	Barn Floor	Environment	Farm	Henan 3	Henan	k119_620391	HAYS3HCT2-1_l500.fa-k119_620391	IS15_IS6_unknown	APH(4)-Ia	IS15_IS6_unknown-APH(4)-Ia	1055	0	1	1	0
HAYS3JFT1-3	Broiler faeces	Chicken	Farm	Henan 3	Henan	k119_15765	HAYS3JFT1-3_l500.fa-k119_15765	IS15_IS6_unknown	APH(4)-Ia	IS15_IS6_unknown-APH(4)-Ia	1055	0	1	1	0
HAYS3JFT2-14	Broiler faeces	Chicken	Farm	Henan 3	Henan	k119_90678	HAYS3JFT2-14_l500.fa-k119_90678	IS15_IS6_unknown	APH(4)-Ia	IS15_IS6_unknown-APH(4)-Ia	1055	0	1	1	0
HAYS3JFT2-15	Broiler faeces	Chicken	Farm	Henan 3	Henan	k119_103661	HAYS3JFT2-15_l500.fa-k119_103661	IS15_IS6_unknown	APH(4)-Ia	IS15_IS6_unknown-APH(4)-Ia	1055	0	1	1	0
HAYS3JFT2-2	Broiler faeces	Chicken	Farm	Henan 3	Henan	k119_46231	HAYS3JFT2-2_l500.fa-k119_46231	IS15_IS6_unknown	APH(4)-Ia	IS15_IS6_unknown-APH(4)-Ia	1055	0	1	1	0
HAYS3JFT2-3	Broiler faeces	Chicken	Farm	Henan 3	Henan	k119_95464	HAYS3JFT2-3_l500.fa-k119_95464	IS15_IS6_unknown	APH(4)-Ia	IS15_IS6_unknown-APH(4)-Ia	1055	0	1	1	0
HAYS3JFT2-8	Broiler faeces	Chicken	Farm	Henan 3	Henan	k119_249437	HAYS3JFT2-8_l500.fa-k119_249437	IS15_IS6_unknown	APH(4)-Ia	IS15_IS6_unknown-APH(4)-Ia	1055	0	1	1	0
HAYS3JFT1-2	Broiler faeces	Chicken	Farm	Henan 3	Henan	k119_346361	HAYS3JFT1-2_l500.fa-k119_346361	IS15_IS6_unknown	APH(4)-Ia	IS15_IS6_unknown-APH(4)-Ia	1055	0	1	1	0
HAYS3JFT1-11	Broiler faeces	Chicken	Farm	Henan 3	Henan	k119_19991	HAYS3JFT1-11_l500.fa-k119_19991	IS15_IS6_unknown	APH(4)-Ia	IS15_IS6_unknown-APH(4)-Ia	1055	0	1	1	0
HAYS3JFT1-14	Broiler faeces	Chicken	Farm	Henan 3	Henan	k119_251371	HAYS3JFT1-14_l500.fa-k119_251371	IS15_IS6_unknown	APH(4)-Ia	IS15_IS6_unknown-APH(4)-Ia	1055	0	1	1	0
HAYS3JFT1-4	Broiler faeces	Chicken	Farm	Henan 3	Henan	k119_30059	HAYS3JFT1-4_l500.fa-k119_30059	IS15_IS6_unknown	APH(4)-Ia	IS15_IS6_unknown-APH(4)-Ia	1055	0	1	1	0
HAYS3JFT2-1	Broiler faeces	Chicken	Farm	Henan 3	Henan	k119_145290	HAYS3JFT2-1_l500.fa-k119_145290	IS15_IS6_unknown	APH(4)-Ia	IS15_IS6_unknown-APH(4)-Ia	1055	0	1	1	0
HAYS3JFT2-12	Broiler faeces	Chicken	Farm	Henan 3	Henan	k119_123316	HAYS3JFT2-12_l500.fa-k119_123316	IS15_IS6_unknown	APH(4)-Ia	IS15_IS6_unknown-APH(4)-Ia	1055	0	1	1	0
HAYS3JFT1-1	Broiler faeces	Chicken	Farm	Henan 3	Henan	k119_24236	HAYS3JFT1-1_l500.fa-k119_24236	IS15_IS6_unknown	APH(4)-Ia	IS15_IS6_unknown-APH(4)-Ia	1055	0	1	1	0
HAYS3JFT1-8	Broiler faeces	Chicken	Farm	Henan 3	Henan	k119_1866930	HAYS3JFT1-8_l500.fa-k119_1866930	IS15_IS6_unknown	APH(4)-Ia	IS15_IS6_unknown-APH(4)-Ia	1055	0	1	1	0
HAYS3JFT1-12	Broiler faeces	Chicken	Farm	Henan 3	Henan	k119_43497	HAYS3JFT1-12_l500.fa-k119_43497	IS15_IS6_unknown	APH(4)-Ia	IS15_IS6_unknown-APH(4)-Ia	1055	0	1	1	0
HAYS3JFT1-15	Broiler faeces	Chicken	Farm	Henan 3	Henan	k119_258852	HAYS3JFT1-15_l500.fa-k119_258852	IS15_IS6_unknown	APH(4)-Ia	IS15_IS6_unknown-APH(4)-Ia	1055	0	1	1	0
HAYS3JFT1-7	Broiler faeces	Chicken	Farm	Henan 3	Henan	k119_160841	HAYS3JFT1-7_l500.fa-k119_160841	IS15_IS6_unknown	APH(4)-Ia	IS15_IS6_unknown-APH(4)-Ia	1055	0	1	1	0
HAYS3JFT1-13	Broiler faeces	Chicken	Farm	Henan 3	Henan	k119_29585	HAYS3JFT1-13_l500.fa-k119_29585	IS15_IS6_unknown	APH(4)-Ia	IS15_IS6_unknown-APH(4)-Ia	1055	0	1	1	0
HAYS3YMT2-3	Broiler Feather	Chicken	Farm	Henan 3	Henan	k119_746769	HAYS3YMT2-3_l500.fa-k119_746769	IS15_IS6_unknown	APH(4)-Ia	IS15_IS6_unknown-APH(4)-Ia	1055	0	1	1	0
HAYS3YMT2-5	Broiler Feather	Chicken	Farm	Henan 3	Henan	k119_909960	HAYS3YMT2-5_l500.fa-k119_909960	IS15_IS6_unknown	APH(4)-Ia	IS15_IS6_unknown-APH(4)-Ia	1055	0	1	1	0
HAYS3YMT1-01	Broiler Feather	Chicken	Farm	Henan 3	Henan	k119_542694	HAYS3YMT1-01_l500.fa-k119_542694	IS15_IS6_unknown	APH(4)-Ia	IS15_IS6_unknown-APH(4)-Ia	1055	0	1	1	0
HAYS3YMT1-02	Broiler Feather	Chicken	Farm	Henan 3	Henan	k119_1088909	HAYS3YMT1-02_l500.fa-k119_1088909	IS15_IS6_unknown	APH(4)-Ia	IS15_IS6_unknown-APH(4)-Ia	1055	0	1	1	0
HAYS3YMT1-04	Broiler Feather	Chicken	Farm	Henan 3	Henan	k119_193585	HAYS3YMT1-04_l500.fa-k119_193585	IS15_IS6_unknown	APH(4)-Ia	IS15_IS6_unknown-APH(4)-Ia	1055	0	1	1	0
LNPCDMT2_01	Barn Floor	Environment	Farm	Liaoning 1	Liaoning	k119_334434	LNPCDMT2_01_l500.fa-k119_334434	IS15_IS6_unknown	APH(4)-Ia	IS15_IS6_unknown-APH(4)-Ia	1055	0	1	1	0
LNPCDMT2_03	Barn Floor	Environment	Farm	Liaoning 1	Liaoning	k119_256168	LNPCDMT2_03_l500.fa-k119_256168	IS15_IS6_unknown	APH(4)-Ia	IS15_IS6_unknown-APH(4)-Ia	1055	0	1	1	0
LNPCJFT1_03	Broiler faeces	Chicken	Farm	Liaoning 1	Liaoning	k119_14569	LNPCJFT1_03_l500.fa-k119_14569	IS15_IS6_unknown	APH(4)-Ia	IS15_IS6_unknown-APH(4)-Ia	1055	0	1	1	0
LNPCJFT1_15	Broiler faeces	Chicken	Farm	Liaoning 1	Liaoning	k119_13039	LNPCJFT1_15_l500.fa-k119_13039	IS15_IS6_unknown	APH(4)-Ia	IS15_IS6_unknown-APH(4)-Ia	1055	0	1	1	0
LNPCJFT2_01	Broiler faeces	Chicken	Farm	Liaoning 1	Liaoning	k119_165231	LNPCJFT2_01_l500.fa-k119_165231	IS15_IS6_unknown	APH(4)-Ia	IS15_IS6_unknown-APH(4)-Ia	1055	0	1	1	0
LNPCJFT2_07	Broiler faeces	Chicken	Farm	Liaoning 1	Liaoning	k119_38351	LNPCJFT2_07_l500.fa-k119_38351	IS15_IS6_unknown	APH(4)-Ia	IS15_IS6_unknown-APH(4)-Ia	1055	0	1	1	0
LNPCJFT2_19	Broiler faeces	Chicken	Farm	Liaoning 1	Liaoning	k119_142877	LNPCJFT2_19_l500.fa-k119_142877	IS15_IS6_unknown	APH(4)-Ia	IS15_IS6_unknown-APH(4)-Ia	1055	0	1	1	0
LNPCJFT1_11	Broiler faeces	Chicken	Farm	Liaoning 1	Liaoning	k119_13895	LNPCJFT1_11_l500.fa-k119_13895	IS15_IS6_unknown	APH(4)-Ia	IS15_IS6_unknown-APH(4)-Ia	1055	0	1	1	0
LNPCJFT2_09	Broiler faeces	Chicken	Farm	Liaoning 1	Liaoning	k119_219252	LNPCJFT2_09_l500.fa-k119_219252	IS15_IS6_unknown	APH(4)-Ia	IS15_IS6_unknown-APH(4)-Ia	1055	0	1	1	0
LNPCJFT2_13	Broiler faeces	Chicken	Farm	Liaoning 1	Liaoning	k119_9850	LNPCJFT2_13_l500.fa-k119_9850	IS15_IS6_unknown	APH(4)-Ia	IS15_IS6_unknown-APH(4)-Ia	1055	0	1	1	0
LNPCJFT2_17	Broiler faeces	Chicken	Farm	Liaoning 1	Liaoning	k119_62851	LNPCJFT2_17_l500.fa-k119_62851	IS15_IS6_unknown	APH(4)-Ia	IS15_IS6_unknown-APH(4)-Ia	1055	0	1	1	0
LNPCJFT1_02	Broiler faeces	Chicken	Farm	Liaoning 1	Liaoning	k119_3367	LNPCJFT1_02_l500.fa-k119_3367	IS15_IS6_unknown	APH(4)-Ia	IS15_IS6_unknown-APH(4)-Ia	1055	0	1	1	0
LNPCJFT2_03	Broiler faeces	Chicken	Farm	Liaoning 1	Liaoning	k119_54796	LNPCJFT2_03_l500.fa-k119_54796	IS15_IS6_unknown	APH(4)-Ia	IS15_IS6_unknown-APH(4)-Ia	1055	0	1	1	0
LNPCJFT2_05	Broiler faeces	Chicken	Farm	Liaoning 1	Liaoning	k119_162108	LNPCJFT2_05_l500.fa-k119_162108	IS15_IS6_unknown	APH(4)-Ia	IS15_IS6_unknown-APH(4)-Ia	1055	0	1	1	0
LNPCJFT2_11	Broiler faeces	Chicken	Farm	Liaoning 1	Liaoning	k119_142711	LNPCJFT2_11_l500.fa-k119_142711	IS15_IS6_unknown	APH(4)-Ia	IS15_IS6_unknown-APH(4)-Ia	1055	0	1	1	0
LNPCJFT2_18	Broiler faeces	Chicken	Farm	Liaoning 1	Liaoning	k119_72099	LNPCJFT2_18_l500.fa-k119_72099	IS15_IS6_unknown	APH(4)-Ia	IS15_IS6_unknown-APH(4)-Ia	1055	0	1	1	0
LNPCJFT1_04	Broiler faeces	Chicken	Farm	Liaoning 1	Liaoning	k119_7417	LNPCJFT1_04_l500.fa-k119_7417	IS15_IS6_unknown	APH(4)-Ia	IS15_IS6_unknown-APH(4)-Ia	1055	0	1	1	0
LNPCJFT1_18	Broiler faeces	Chicken	Farm	Liaoning 1	Liaoning	k119_11634	LNPCJFT1_18_l500.fa-k119_11634	IS15_IS6_unknown	APH(4)-Ia	IS15_IS6_unknown-APH(4)-Ia	1055	0	1	1	0
LNPCJFT1_01	Broiler faeces	Chicken	Farm	Liaoning 1	Liaoning	k119_48941	LNPCJFT1_01_l500.fa-k119_48941	IS15_IS6_unknown	APH(4)-Ia	IS15_IS6_unknown-APH(4)-Ia	1055	0	1	1	0
LNPCJFT1_10	Broiler faeces	Chicken	Farm	Liaoning 1	Liaoning	k119_34161	LNPCJFT1_10_l500.fa-k119_34161	IS15_IS6_unknown	APH(4)-Ia	IS15_IS6_unknown-APH(4)-Ia	1061	0	1	1	0
LNPCTRT1_03	Soil	Environment	Farm	Liaoning 1	Liaoning	k119_442293	LNPCTRT1_03_l500.fa-k119_442293	IS15_IS6_unknown	APH(4)-Ia	IS15_IS6_unknown-APH(4)-Ia	1055	0	1	1	0
LNPCTRT2_03	Soil	Environment	Farm	Liaoning 1	Liaoning	k119_755312	LNPCTRT2_03_l500.fa-k119_755312	IS15_IS6_unknown	APH(4)-Ia	IS15_IS6_unknown-APH(4)-Ia	1055	0	1	1	0
LNTPDMT2_03	Barn Floor	Environment	Farm	Liaoning 2	Liaoning	k119_587579	LNTPDMT2_03_l500.fa-k119_587579	IS15_IS6_unknown	APH(4)-Ia	IS15_IS6_unknown-APH(4)-Ia	1055	0	1	1	0
LNTPJFT2_11	Broiler faeces	Chicken	Farm	Liaoning 2	Liaoning	k119_38962	LNTPJFT2_11_l500.fa-k119_38962	IS15_IS6_unknown	APH(4)-Ia	IS15_IS6_unknown-APH(4)-Ia	1055	0	1	1	0
LNTPJFT2_01	Broiler faeces	Chicken	Farm	Liaoning 2	Liaoning	k119_172178	LNTPJFT2_01_l500.fa-k119_172178	IS15_IS6_unknown	APH(4)-Ia	IS15_IS6_unknown-APH(4)-Ia	1055	0	1	1	0
LNTPJFT1_06	Broiler faeces	Chicken	Farm	Liaoning 2	Liaoning	k119_35794	LNTPJFT1_06_l500.fa-k119_35794	IS15_IS6_unknown	APH(4)-Ia	IS15_IS6_unknown-APH(4)-Ia	1055	0	1	1	0
LNTPJFT1_12	Broiler faeces	Chicken	Farm	Liaoning 2	Liaoning	k119_164585	LNTPJFT1_12_l500.fa-k119_164585	IS15_IS6_unknown	APH(4)-Ia	IS15_IS6_unknown-APH(4)-Ia	1055	0	1	1	0
LNTPJFT2_07	Broiler faeces	Chicken	Farm	Liaoning 2	Liaoning	k119_81673	LNTPJFT2_07_l500.fa-k119_81673	IS15_IS6_unknown	APH(4)-Ia	IS15_IS6_unknown-APH(4)-Ia	1055	0	1	1	0
LNTPJFT2_17	Broiler faeces	Chicken	Farm	Liaoning 2	Liaoning	k119_583421	LNTPJFT2_17_l500.fa-k119_583421	IS15_IS6_unknown	APH(4)-Ia	IS15_IS6_unknown-APH(4)-Ia	1055	0	1	1	0
LNTPJFT2_13	Broiler faeces	Chicken	Farm	Liaoning 2	Liaoning	k119_84611	LNTPJFT2_13_l500.fa-k119_84611	IS15_IS6_unknown	APH(4)-Ia	IS15_IS6_unknown-APH(4)-Ia	1055	0	1	1	0
LNTPJFT1_09	Broiler faeces	Chicken	Farm	Liaoning 2	Liaoning	k119_41355	LNTPJFT1_09_l500.fa-k119_41355	IS15_IS6_unknown	APH(4)-Ia	IS15_IS6_unknown-APH(4)-Ia	1055	0	1	1	0
LNLDDMT1-03	Barn Floor	Environment	Farm	Liaoning 3	Liaoning	k119_206207	LNLDDMT1-03_l500.fa-k119_206207	IS15_IS6_unknown	APH(4)-Ia	IS15_IS6_unknown-APH(4)-Ia	1055	0	1	1	0
LNLDJFT2-13	Broiler faeces	Chicken	Farm	Liaoning 3	Liaoning	k119_177402	LNLDJFT2-13_l500.fa-k119_177402	IS15_IS6_unknown	APH(4)-Ia	IS15_IS6_unknown-APH(4)-Ia	1055	0	1	1	0
LNLDJFT2-02	Broiler faeces	Chicken	Farm	Liaoning 3	Liaoning	k119_314459	LNLDJFT2-02_l500.fa-k119_314459	IS15_IS6_unknown	APH(4)-Ia	IS15_IS6_unknown-APH(4)-Ia	1055	0	1	1	0
LNLDJFT1-15	Broiler faeces	Chicken	Farm	Liaoning 3	Liaoning	k119_32124	LNLDJFT1-15_l500.fa-k119_32124	IS15_IS6_unknown	APH(4)-Ia	IS15_IS6_unknown-APH(4)-Ia	1055	0	1	1	0
LNLDJFT1-02	Broiler faeces	Chicken	Farm	Liaoning 3	Liaoning	k119_136865	LNLDJFT1-02_l500.fa-k119_136865	IS15_IS6_unknown	APH(4)-Ia	IS15_IS6_unknown-APH(4)-Ia	1055	0	1	1	0
LNLDJFT1-10	Broiler faeces	Chicken	Farm	Liaoning 3	Liaoning	k119_58377	LNLDJFT1-10_l500.fa-k119_58377	IS15_IS6_unknown	APH(4)-Ia	IS15_IS6_unknown-APH(4)-Ia	1055	0	1	1	0
LNLDJFT1-05	Broiler faeces	Chicken	Farm	Liaoning 3	Liaoning	k119_183928	LNLDJFT1-05_l500.fa-k119_183928	IS15_IS6_unknown	APH(4)-Ia	IS15_IS6_unknown-APH(4)-Ia	1055	0	1	1	0
LNLDJFT1-17	Broiler faeces	Chicken	Farm	Liaoning 3	Liaoning	k119_235312	LNLDJFT1-17_l500.fa-k119_235312	IS15_IS6_unknown	APH(4)-Ia	IS15_IS6_unknown-APH(4)-Ia	1055	0	1	1	0
LNLDJFT2-11	Broiler faeces	Chicken	Farm	Liaoning 3	Liaoning	k119_260905	LNLDJFT2-11_l500.fa-k119_260905	IS15_IS6_unknown	APH(4)-Ia	IS15_IS6_unknown-APH(4)-Ia	1056	0	1	1	0
PDDTT3S4L0819	Broiler carcass	Chicken	Slaughterhouse	Shandong 1_1	Shandong	k119_536798	PDDTT3S4L0819_l500.fa-k119_536798	IS15_IS6_unknown	APH(4)-Ia	IS15_IS6_unknown-APH(4)-Ia	1055	0	1	1	0
PDJFT1S3L0405	Broiler faeces	Chicken	Farm	Shandong 1_1	Shandong	k119_313120	PDJFT1S3L0405_l500.fa-k119_313120	IS15_IS6_unknown	APH(4)-Ia	IS15_IS6_unknown-APH(4)-Ia	1055	0	1	1	0
PDJFT1S3L0609	Broiler faeces	Chicken	Farm	Shandong 1_1	Shandong	k119_48327	PDJFT1S3L0609_l500.fa-k119_48327	IS15_IS6_unknown	APH(4)-Ia	IS15_IS6_unknown-APH(4)-Ia	1055	0	1	1	0
PDJFT1S4L0515	Broiler faeces	Chicken	Farm	Shandong 1_1	Shandong	k119_41801	PDJFT1S4L0515_l500.fa-k119_41801	IS15_IS6_unknown	APH(4)-Ia	IS15_IS6_unknown-APH(4)-Ia	1055	0	1	1	0
PDJFT1S4L0616	Broiler faeces	Chicken	Farm	Shandong 1_1	Shandong	k119_155701	PDJFT1S4L0616_l500.fa-k119_155701	IS15_IS6_unknown	APH(4)-Ia	IS15_IS6_unknown-APH(4)-Ia	1055	0	1	1	0
PDJFT2S3L0101	Broiler faeces	Chicken	Farm	Shandong 1_1	Shandong	k119_61541	PDJFT2S3L0101_l500.fa-k119_61541	IS15_IS6_unknown	APH(4)-Ia	IS15_IS6_unknown-APH(4)-Ia	1055	0	1	1	0
PDJFT2S3L0303	Broiler faeces	Chicken	Farm	Shandong 1_1	Shandong	k119_22895	PDJFT2S3L0303_l500.fa-k119_22895	IS15_IS6_unknown	APH(4)-Ia	IS15_IS6_unknown-APH(4)-Ia	1055	0	1	1	0
PDJFT2S3L0304	Broiler faeces	Chicken	Farm	Shandong 1_1	Shandong	k119_12479	PDJFT2S3L0304_l500.fa-k119_12479	IS15_IS6_unknown	APH(4)-Ia	IS15_IS6_unknown-APH(4)-Ia	1055	0	1	1	0
PDJFT2S3L0507	Broiler faeces	Chicken	Farm	Shandong 1_1	Shandong	k119_160242	PDJFT2S3L0507_l500.fa-k119_160242	IS15_IS6_unknown	APH(4)-Ia	IS15_IS6_unknown-APH(4)-Ia	1055	0	1	1	0
PDJFT1S3L0202	Broiler faeces	Chicken	Farm	Shandong 1_1	Shandong	k119_384404	PDJFT1S3L0202_l500.fa-k119_384404	IS15_IS6_unknown	APH(4)-Ia	IS15_IS6_unknown-APH(4)-Ia	1055	0	1	1	0
PDJFT1S3L0304	Broiler faeces	Chicken	Farm	Shandong 1_1	Shandong	k119_232792	PDJFT1S3L0304_l500.fa-k119_232792	IS15_IS6_unknown	APH(4)-Ia	IS15_IS6_unknown-APH(4)-Ia	1055	0	1	1	0
PDJFT1S4L0212	Broiler faeces	Chicken	Farm	Shandong 1_1	Shandong	k119_124749	PDJFT1S4L0212_l500.fa-k119_124749	IS15_IS6_unknown	APH(4)-Ia	IS15_IS6_unknown-APH(4)-Ia	1055	0	1	1	0
PDJFT1S4L0313	Broiler faeces	Chicken	Farm	Shandong 1_1	Shandong	k119_27032	PDJFT1S4L0313_l500.fa-k119_27032	IS15_IS6_unknown	APH(4)-Ia	IS15_IS6_unknown-APH(4)-Ia	1055	0	1	1	0
PDJFT2S3L0406	Broiler faeces	Chicken	Farm	Shandong 1_1	Shandong	k119_1682	PDJFT2S3L0406_l500.fa-k119_1682	IS15_IS6_unknown	APH(4)-Ia	IS15_IS6_unknown-APH(4)-Ia	1055	0	1	1	0
PDJFT2S3L0508	Broiler faeces	Chicken	Farm	Shandong 1_1	Shandong	k119_112378	PDJFT2S3L0508_l500.fa-k119_112378	IS15_IS6_unknown	APH(4)-Ia	IS15_IS6_unknown-APH(4)-Ia	1055	0	1	1	0
PDJFT2S4L0616	Broiler faeces	Chicken	Farm	Shandong 1_1	Shandong	k119_26702	PDJFT2S4L0616_l500.fa-k119_26702	IS15_IS6_unknown	APH(4)-Ia	IS15_IS6_unknown-APH(4)-Ia	1055	0	1	1	0
PDJFT2S4L0819	Broiler faeces	Chicken	Farm	Shandong 1_1	Shandong	k119_31575	PDJFT2S4L0819_l500.fa-k119_31575	IS15_IS6_unknown	APH(4)-Ia	IS15_IS6_unknown-APH(4)-Ia	1055	0	1	1	0
PDJFT1S3L0406	Broiler faeces	Chicken	Farm	Shandong 1_1	Shandong	k119_46876	PDJFT1S3L0406_l500.fa-k119_46876	IS15_IS6_unknown	APH(4)-Ia	IS15_IS6_unknown-APH(4)-Ia	1055	0	1	1	0
PDJFT1S3L0610	Broiler faeces	Chicken	Farm	Shandong 1_1	Shandong	k119_118927	PDJFT1S3L0610_l500.fa-k119_118927	IS15_IS6_unknown	APH(4)-Ia	IS15_IS6_unknown-APH(4)-Ia	1055	0	1	1	0
PDJFT2S3L0609	Broiler faeces	Chicken	Farm	Shandong 1_1	Shandong	k119_1319	PDJFT2S3L0609_l500.fa-k119_1319	IS15_IS6_unknown	APH(4)-Ia	IS15_IS6_unknown-APH(4)-Ia	1055	0	1	1	0
PDJFT2S4L0212	Broiler faeces	Chicken	Farm	Shandong 1_1	Shandong	k119_10357	PDJFT2S4L0212_l500.fa-k119_10357	IS15_IS6_unknown	APH(4)-Ia	IS15_IS6_unknown-APH(4)-Ia	1055	0	1	1	0
PDJFT2S4L0313	Broiler faeces	Chicken	Farm	Shandong 1_1	Shandong	k119_26129	PDJFT2S4L0313_l500.fa-k119_26129	IS15_IS6_unknown	APH(4)-Ia	IS15_IS6_unknown-APH(4)-Ia	1055	0	1	1	0
PDJFT2S4L0414	Broiler faeces	Chicken	Farm	Shandong 1_1	Shandong	k119_7979	PDJFT2S4L0414_l500.fa-k119_7979	IS15_IS6_unknown	APH(4)-Ia	IS15_IS6_unknown-APH(4)-Ia	1055	0	1	1	0
PDJFT1S4L0819	Broiler faeces	Chicken	Farm	Shandong 1_1	Shandong	k119_7381	PDJFT1S4L0819_l500.fa-k119_7381	IS15_IS6_unknown	APH(4)-Ia	IS15_IS6_unknown-APH(4)-Ia	1055	0	1	1	0
PDJFT2S3L0202	Broiler faeces	Chicken	Farm	Shandong 1_1	Shandong	k119_25140	PDJFT2S3L0202_l500.fa-k119_25140	IS15_IS6_unknown	APH(4)-Ia	IS15_IS6_unknown-APH(4)-Ia	1055	0	1	1	0
PDJFT2S4L0515	Broiler faeces	Chicken	Farm	Shandong 1_1	Shandong	k119_14041	PDJFT2S4L0515_l500.fa-k119_14041	IS15_IS6_unknown	APH(4)-Ia	IS15_IS6_unknown-APH(4)-Ia	1492	0	1	1	0
PDTRT2S404	Soil	Environment	Farm	Shandong 1_1	Shandong	k119_575233	PDTRT2S404_l500.fa-k119_575233	IS15_IS6_unknown	APH(4)-Ia	IS15_IS6_unknown-APH(4)-Ia	1055	0	1	1	0
PDJFL1A5	Broiler faeces	Chicken	Farm	Shandong 1_2	Shandong	k119_174474	PDJFL1A5_l500.fa-k119_174474	IS15_IS6_unknown	APH(4)-Ia	IS15_IS6_unknown-APH(4)-Ia	1055	0	1	1	0
PDJFL1A6	Broiler faeces	Chicken	Farm	Shandong 1_2	Shandong	k119_82688	PDJFL1A6_l500.fa-k119_82688	IS15_IS6_unknown	APH(4)-Ia	IS15_IS6_unknown-APH(4)-Ia	1055	0	1	1	0
PDJFL1A1	Broiler faeces	Chicken	Farm	Shandong 1_2	Shandong	k119_37103	PDJFL1A1_l500.fa-k119_37103	IS15_IS6_unknown	APH(4)-Ia	IS15_IS6_unknown-APH(4)-Ia	1055	0	1	1	0
PDJFL1A3	Broiler faeces	Chicken	Farm	Shandong 1_2	Shandong	k119_12698	PDJFL1A3_l500.fa-k119_12698	IS15_IS6_unknown	APH(4)-Ia	IS15_IS6_unknown-APH(4)-Ia	1055	0	1	1	0
PDJFL1C2	Broiler faeces	Chicken	Farm	Shandong 1_2	Shandong	k119_120578	PDJFL1C2_l500.fa-k119_120578	IS15_IS6_unknown	APH(4)-Ia	IS15_IS6_unknown-APH(4)-Ia	1055	0	1	1	0
PDJFL1C3	Broiler faeces	Chicken	Farm	Shandong 1_2	Shandong	k119_8065	PDJFL1C3_l500.fa-k119_8065	IS15_IS6_unknown	APH(4)-Ia	IS15_IS6_unknown-APH(4)-Ia	1055	0	1	1	0
PDJFL1C4	Broiler faeces	Chicken	Farm	Shandong 1_2	Shandong	k119_81136	PDJFL1C4_l500.fa-k119_81136	IS15_IS6_unknown	APH(4)-Ia	IS15_IS6_unknown-APH(4)-Ia	1055	0	1	1	0
PDJFL2A1	Broiler faeces	Chicken	Farm	Shandong 1_2	Shandong	k119_513469	PDJFL2A1_l500.fa-k119_513469	IS15_IS6_unknown	APH(4)-Ia	IS15_IS6_unknown-APH(4)-Ia	1055	0	1	1	0
PDJFL2C6	Broiler faeces	Chicken	Farm	Shandong 1_2	Shandong	k119_8832	PDJFL2C6_l500.fa-k119_8832	IS15_IS6_unknown	APH(4)-Ia	IS15_IS6_unknown-APH(4)-Ia	1055	0	1	1	0
PDJFL2C1	Broiler faeces	Chicken	Farm	Shandong 1_2	Shandong	k119_178441	PDJFL2C1_l500.fa-k119_178441	IS15_IS6_unknown	APH(4)-Ia	IS15_IS6_unknown-APH(4)-Ia	1055	0	1	1	0
PDJFL2C5	Broiler faeces	Chicken	Farm	Shandong 1_2	Shandong	k119_62431	PDJFL2C5_l500.fa-k119_62431	IS15_IS6_unknown	APH(4)-Ia	IS15_IS6_unknown-APH(4)-Ia	1055	0	1	1	0
PDJFL2C4	Broiler faeces	Chicken	Farm	Shandong 1_2	Shandong	k119_133429	PDJFL2C4_l500.fa-k119_133429	IS15_IS6_unknown	APH(4)-Ia	IS15_IS6_unknown-APH(4)-Ia	1055	0	1	1	0
PDJFL1C6	Broiler faeces	Chicken	Farm	Shandong 1_2	Shandong	k119_9739	PDJFL1C6_l500.fa-k119_9739	IS15_IS6_unknown	APH(4)-Ia	IS15_IS6_unknown-APH(4)-Ia	1055	0	1	1	0
PDJFL1A2	Broiler faeces	Chicken	Farm	Shandong 1_2	Shandong	k119_74486	PDJFL1A2_l500.fa-k119_74486	IS15_IS6_unknown	APH(4)-Ia	IS15_IS6_unknown-APH(4)-Ia	1055	0	1	1	0
PDJFL1A4	Broiler faeces	Chicken	Farm	Shandong 1_2	Shandong	k119_263420	PDJFL1A4_l500.fa-k119_263420	IS15_IS6_unknown	APH(4)-Ia	IS15_IS6_unknown-APH(4)-Ia	1055	0	1	1	0
PDJFL2A2	Broiler faeces	Chicken	Farm	Shandong 1_2	Shandong	k119_49026	PDJFL2A2_l500.fa-k119_49026	IS15_IS6_unknown	APH(4)-Ia	IS15_IS6_unknown-APH(4)-Ia	1055	0	1	1	0
PDJFL2C3	Broiler faeces	Chicken	Farm	Shandong 1_2	Shandong	k119_8584	PDJFL2C3_l500.fa-k119_8584	IS15_IS6_unknown	APH(4)-Ia	IS15_IS6_unknown-APH(4)-Ia	1055	0	1	1	0
PDJFL1C1	Broiler faeces	Chicken	Farm	Shandong 1_2	Shandong	k119_46433	PDJFL1C1_l500.fa-k119_46433	IS15_IS6_unknown	APH(4)-Ia	IS15_IS6_unknown-APH(4)-Ia	1055	0	1	1	0
PDJFL1C5	Broiler faeces	Chicken	Farm	Shandong 1_2	Shandong	k119_10557	PDJFL1C5_l500.fa-k119_10557	IS15_IS6_unknown	APH(4)-Ia	IS15_IS6_unknown-APH(4)-Ia	1055	0	1	1	0
SDPD1JTT3.02	Broiler carcass	Chicken	Slaughterhouse	Shandong 2	Shandong	k119_126184	SDPD1JTT3.02_l500.fa-k119_126184	IS15_IS6_unknown	APH(4)-Ia	IS15_IS6_unknown-APH(4)-Ia	1055	0	1	1	0
SDPD1JTT3.07	Broiler carcass	Chicken	Slaughterhouse	Shandong 2	Shandong	k119_35266	SDPD1JTT3.07_l500.fa-k119_35266	IS15_IS6_unknown	APH(4)-Ia	IS15_IS6_unknown-APH(4)-Ia	1055	0	1	1	0
SDPD1JTT3.14	Broiler carcass	Chicken	Slaughterhouse	Shandong 2	Shandong	k119_430862	SDPD1JTT3.14_l500.fa-k119_430862	IS15_IS6_unknown	APH(4)-Ia	IS15_IS6_unknown-APH(4)-Ia	1055	0	1	1	0
SDPD1JFT1.09	Broiler faeces	Chicken	Farm	Shandong 2	Shandong	k119_159383	SDPD1JFT1.09_l500.fa-k119_159383	IS15_IS6_unknown	APH(4)-Ia	IS15_IS6_unknown-APH(4)-Ia	1055	0	1	1	0
SDPD1JFT1.03	Broiler faeces	Chicken	Farm	Shandong 2	Shandong	k119_3277	SDPD1JFT1.03_l500.fa-k119_3277	IS15_IS6_unknown	APH(4)-Ia	IS15_IS6_unknown-APH(4)-Ia	1055	0	1	1	0
SDPD1JFT1.05	Broiler faeces	Chicken	Farm	Shandong 2	Shandong	k119_28455	SDPD1JFT1.05_l500.fa-k119_28455	IS15_IS6_unknown	APH(4)-Ia	IS15_IS6_unknown-APH(4)-Ia	1055	0	1	1	0
SDPD1JFT1.07	Broiler faeces	Chicken	Farm	Shandong 2	Shandong	k119_30600	SDPD1JFT1.07_l500.fa-k119_30600	IS15_IS6_unknown	APH(4)-Ia	IS15_IS6_unknown-APH(4)-Ia	1055	0	1	1	0
SDPD1JFT1.12	Broiler faeces	Chicken	Farm	Shandong 2	Shandong	k119_251966	SDPD1JFT1.12_l500.fa-k119_251966	IS15_IS6_unknown	APH(4)-Ia	IS15_IS6_unknown-APH(4)-Ia	1055	0	1	1	0
SDPD1JFT1.13	Broiler faeces	Chicken	Farm	Shandong 2	Shandong	k119_98340	SDPD1JFT1.13_l500.fa-k119_98340	IS15_IS6_unknown	APH(4)-Ia	IS15_IS6_unknown-APH(4)-Ia	1055	0	1	1	0
SDPD1JFT2.01	Broiler faeces	Chicken	Farm	Shandong 2	Shandong	k119_477115	SDPD1JFT2.01_l500.fa-k119_477115	IS15_IS6_unknown	APH(4)-Ia	IS15_IS6_unknown-APH(4)-Ia	1055	0	1	1	0
SDPD1JFT2.12	Broiler faeces	Chicken	Farm	Shandong 2	Shandong	k119_429789	SDPD1JFT2.12_l500.fa-k119_429789	IS15_IS6_unknown	APH(4)-Ia	IS15_IS6_unknown-APH(4)-Ia	1055	0	1	1	0
SDPD1JFT2.14	Broiler faeces	Chicken	Farm	Shandong 2	Shandong	k119_658327	SDPD1JFT2.14_l500.fa-k119_658327	IS15_IS6_unknown	APH(4)-Ia	IS15_IS6_unknown-APH(4)-Ia	1055	0	1	1	0
SDPD1JFT1.06	Broiler faeces	Chicken	Farm	Shandong 2	Shandong	k119_86524	SDPD1JFT1.06_l500.fa-k119_86524	IS15_IS6_unknown	APH(4)-Ia	IS15_IS6_unknown-APH(4)-Ia	1055	0	1	1	0
SDPD1JFT1.08	Broiler faeces	Chicken	Farm	Shandong 2	Shandong	k119_606441	SDPD1JFT1.08_l500.fa-k119_606441	IS15_IS6_unknown	APH(4)-Ia	IS15_IS6_unknown-APH(4)-Ia	1055	0	1	1	0
SDPD1JFT1.11	Broiler faeces	Chicken	Farm	Shandong 2	Shandong	k119_149910	SDPD1JFT1.11_l500.fa-k119_149910	IS15_IS6_unknown	APH(4)-Ia	IS15_IS6_unknown-APH(4)-Ia	1055	0	1	1	0
SDPD1JFT1.14	Broiler faeces	Chicken	Farm	Shandong 2	Shandong	k119_107245	SDPD1JFT1.14_l500.fa-k119_107245	IS15_IS6_unknown	APH(4)-Ia	IS15_IS6_unknown-APH(4)-Ia	1055	0	1	1	0
SDPD1JFT1.15	Broiler faeces	Chicken	Farm	Shandong 2	Shandong	k119_326901	SDPD1JFT1.15_l500.fa-k119_326901	IS15_IS6_unknown	APH(4)-Ia	IS15_IS6_unknown-APH(4)-Ia	1055	0	1	1	0
SDPD1JFT1.01	Broiler faeces	Chicken	Farm	Shandong 2	Shandong	k119_329464	SDPD1JFT1.01_l500.fa-k119_329464	IS15_IS6_unknown	APH(4)-Ia	IS15_IS6_unknown-APH(4)-Ia	1055	0	1	1	0
SDPD1JFT2.13	Broiler faeces	Chicken	Farm	Shandong 2	Shandong	k119_588044	SDPD1JFT2.13_l500.fa-k119_588044	IS15_IS6_unknown	APH(4)-Ia	IS15_IS6_unknown-APH(4)-Ia	1055	0	1	1	0
SDPD1JFT1.02	Broiler faeces	Chicken	Farm	Shandong 2	Shandong	k119_128666	SDPD1JFT1.02_l500.fa-k119_128666	IS15_IS6_unknown	APH(4)-Ia	IS15_IS6_unknown-APH(4)-Ia	3624	0	1	1	0
SDPD1JFT1.10	Broiler faeces	Chicken	Farm	Shandong 2	Shandong	k119_41804	SDPD1JFT1.10_l500.fa-k119_41804	IS15_IS6_unknown	APH(4)-Ia	IS15_IS6_unknown-APH(4)-Ia	3624	0	1	1	0
SDPD1YMT1.02	Broiler Feather	Chicken	Farm	Shandong 2	Shandong	k119_239043	SDPD1YMT1.02_l500.fa-k119_239043	IS15_IS6_unknown	APH(4)-Ia	IS15_IS6_unknown-APH(4)-Ia	1055	0	1	1	0
SDPD1YMT1.03	Broiler Feather	Chicken	Farm	Shandong 2	Shandong	k119_915357	SDPD1YMT1.03_l500.fa-k119_915357	IS15_IS6_unknown	APH(4)-Ia	IS15_IS6_unknown-APH(4)-Ia	1055	0	1	1	0
SDPD3JFT2-03	Broiler faeces	Chicken	Farm	Shandong 3	Shandong	k119_49125	SDPD3JFT2-03_l500.fa-k119_49125	IS15_IS6_unknown	APH(4)-Ia	IS15_IS6_unknown-APH(4)-Ia	1055	0	1	1	0
SDPD3JFT2-01	Broiler faeces	Chicken	Farm	Shandong 3	Shandong	k119_11166	SDPD3JFT2-01_l500.fa-k119_11166	IS15_IS6_unknown	APH(4)-Ia	IS15_IS6_unknown-APH(4)-Ia	1055	0	1	1	0
SDPD3JFT2-07	Broiler faeces	Chicken	Farm	Shandong 3	Shandong	k119_56471	SDPD3JFT2-07_l500.fa-k119_56471	IS15_IS6_unknown	APH(4)-Ia	IS15_IS6_unknown-APH(4)-Ia	1055	0	1	1	0
SDPD3JFT1-19	Broiler faeces	Chicken	Farm	Shandong 3	Shandong	k119_82596	SDPD3JFT1-19_l500.fa-k119_82596	IS15_IS6_unknown	APH(4)-Ia	IS15_IS6_unknown-APH(4)-Ia	1055	0	1	1	0
SDPD3JFT1-20	Broiler faeces	Chicken	Farm	Shandong 3	Shandong	k119_16000	SDPD3JFT1-20_l500.fa-k119_16000	IS15_IS6_unknown	APH(4)-Ia	IS15_IS6_unknown-APH(4)-Ia	1055	0	1	1	0
SDPD3JFT2-02	Broiler faeces	Chicken	Farm	Shandong 3	Shandong	k119_14690	SDPD3JFT2-02_l500.fa-k119_14690	IS15_IS6_unknown	APH(4)-Ia	IS15_IS6_unknown-APH(4)-Ia	1055	0	1	1	0
SDPD3JFT2-09	Broiler faeces	Chicken	Farm	Shandong 3	Shandong	k119_10064	SDPD3JFT2-09_l500.fa-k119_10064	IS15_IS6_unknown	APH(4)-Ia	IS15_IS6_unknown-APH(4)-Ia	1055	0	1	1	0
SDPD3JFT2-11	Broiler faeces	Chicken	Farm	Shandong 3	Shandong	k119_54913	SDPD3JFT2-11_l500.fa-k119_54913	IS15_IS6_unknown	APH(4)-Ia	IS15_IS6_unknown-APH(4)-Ia	1055	0	1	1	0
SDPD3JFT2-10	Broiler faeces	Chicken	Farm	Shandong 3	Shandong	k119_82895	SDPD3JFT2-10_l500.fa-k119_82895	IS15_IS6_unknown	APH(4)-Ia	IS15_IS6_unknown-APH(4)-Ia	1055	0	1	1	0
SDPD3JFT1-13	Broiler faeces	Chicken	Farm	Shandong 3	Shandong	k119_163590	SDPD3JFT1-13_l500.fa-k119_163590	IS15_IS6_unknown	APH(4)-Ia	IS15_IS6_unknown-APH(4)-Ia	1055	0	1	1	0
SDPD3JFT2-12	Broiler faeces	Chicken	Farm	Shandong 3	Shandong	k119_49050	SDPD3JFT2-12_l500.fa-k119_49050	IS15_IS6_unknown	APH(4)-Ia	IS15_IS6_unknown-APH(4)-Ia	1055	0	1	1	0
SDPD3TWT3-01	Wastewater	Environment	Slaughterhouse	Shandong 3	Shandong	k119_392996	SDPD3TWT3-01_l500.fa-k119_392996	IS15_IS6_unknown	APH(4)-Ia	IS15_IS6_unknown-APH(4)-Ia	1055	0	1	1	0
SDPD4HCT1-01	Barn Floor	Environment	Farm	Shandong 4	Shandong	k119_496745	SDPD4HCT1-01_l500.fa-k119_496745	IS15_IS6_unknown	APH(4)-Ia	IS15_IS6_unknown-APH(4)-Ia	1055	0	1	1	0
SDPD4HCT1-03	Barn Floor	Environment	Farm	Shandong 4	Shandong	k119_621276	SDPD4HCT1-03_l500.fa-k119_621276	IS15_IS6_unknown	APH(4)-Ia	IS15_IS6_unknown-APH(4)-Ia	1055	0	1	1	0
SDPD4HCT2-02	Barn Floor	Environment	Farm	Shandong 4	Shandong	k119_131493	SDPD4HCT2-02_l500.fa-k119_131493	IS15_IS6_unknown	APH(4)-Ia	IS15_IS6_unknown-APH(4)-Ia	1055	0	1	1	0
SDPD4HCT1-02	Barn Floor	Environment	Farm	Shandong 4	Shandong	k119_688974	SDPD4HCT1-02_l500.fa-k119_688974	IS15_IS6_unknown	APH(4)-Ia	IS15_IS6_unknown-APH(4)-Ia	1055	0	1	1	0
SDPD4HCT2-01	Barn Floor	Environment	Farm	Shandong 4	Shandong	k119_1159582	SDPD4HCT2-01_l500.fa-k119_1159582	IS15_IS6_unknown	APH(4)-Ia	IS15_IS6_unknown-APH(4)-Ia	1055	0	1	1	0
SDPD4HCT2-03	Barn Floor	Environment	Farm	Shandong 4	Shandong	k119_668448	SDPD4HCT2-03_l500.fa-k119_668448	IS15_IS6_unknown	APH(4)-Ia	IS15_IS6_unknown-APH(4)-Ia	1055	0	1	1	0
SDPD4JFT2-01	Broiler faeces	Chicken	Farm	Shandong 4	Shandong	k119_364704	SDPD4JFT2-01_l500.fa-k119_364704	IS15_IS6_unknown	APH(4)-Ia	IS15_IS6_unknown-APH(4)-Ia	1055	0	1	1	0
SDPD4JFT1-08	Broiler faeces	Chicken	Farm	Shandong 4	Shandong	k119_142278	SDPD4JFT1-08_l500.fa-k119_142278	IS15_IS6_unknown	APH(4)-Ia	IS15_IS6_unknown-APH(4)-Ia	1055	0	1	1	0
SDPD4JFT1-15	Broiler faeces	Chicken	Farm	Shandong 4	Shandong	k119_82836	SDPD4JFT1-15_l500.fa-k119_82836	IS15_IS6_unknown	APH(4)-Ia	IS15_IS6_unknown-APH(4)-Ia	1055	0	1	1	0
SDPD4JFT1-18	Broiler faeces	Chicken	Farm	Shandong 4	Shandong	k119_540224	SDPD4JFT1-18_l500.fa-k119_540224	IS15_IS6_unknown	APH(4)-Ia	IS15_IS6_unknown-APH(4)-Ia	1055	0	1	1	0
SDPD4JFT2-03	Broiler faeces	Chicken	Farm	Shandong 4	Shandong	k119_11839	SDPD4JFT2-03_l500.fa-k119_11839	IS15_IS6_unknown	APH(4)-Ia	IS15_IS6_unknown-APH(4)-Ia	1055	0	1	1	0
SDPD4JFT2-07	Broiler faeces	Chicken	Farm	Shandong 4	Shandong	k119_491050	SDPD4JFT2-07_l500.fa-k119_491050	IS15_IS6_unknown	APH(4)-Ia	IS15_IS6_unknown-APH(4)-Ia	1055	0	1	1	0
SDPD4JFT1-13	Broiler faeces	Chicken	Farm	Shandong 4	Shandong	k119_948296	SDPD4JFT1-13_l500.fa-k119_948296	IS15_IS6_unknown	APH(4)-Ia	IS15_IS6_unknown-APH(4)-Ia	1055	0	1	1	0
SDPD4YMT1-04	Broiler Feather	Chicken	Farm	Shandong 4	Shandong	k119_689732	SDPD4YMT1-04_l500.fa-k119_689732	IS15_IS6_unknown	APH(4)-Ia	IS15_IS6_unknown-APH(4)-Ia	1055	0	1	1	0
SDPD4YMT1-01	Broiler Feather	Chicken	Farm	Shandong 4	Shandong	k119_552509	SDPD4YMT1-01_l500.fa-k119_552509	IS15_IS6_unknown	APH(4)-Ia	IS15_IS6_unknown-APH(4)-Ia	1055	0	1	1	0
SDPD4YMT1-05	Broiler Feather	Chicken	Farm	Shandong 4	Shandong	k119_448243	SDPD4YMT1-05_l500.fa-k119_448243	IS15_IS6_unknown	APH(4)-Ia	IS15_IS6_unknown-APH(4)-Ia	1055	0	1	1	0
SDPD4YMT2-04	Broiler Feather	Chicken	Farm	Shandong 4	Shandong	k119_611822	SDPD4YMT2-04_l500.fa-k119_611822	IS15_IS6_unknown	APH(4)-Ia	IS15_IS6_unknown-APH(4)-Ia	1055	0	1	1	0
SDPD4YMT2-01	Broiler Feather	Chicken	Farm	Shandong 4	Shandong	k119_430981	SDPD4YMT2-01_l500.fa-k119_430981	IS15_IS6_unknown	APH(4)-Ia	IS15_IS6_unknown-APH(4)-Ia	1055	0	1	1	0
SDPD4YMT2-03	Broiler Feather	Chicken	Farm	Shandong 4	Shandong	k119_1236639	SDPD4YMT2-03_l500.fa-k119_1236639	IS15_IS6_unknown	APH(4)-Ia	IS15_IS6_unknown-APH(4)-Ia	1055	0	1	1	0
SDPD4YMT2-05	Broiler Feather	Chicken	Farm	Shandong 4	Shandong	k119_1079892	SDPD4YMT2-05_l500.fa-k119_1079892	IS15_IS6_unknown	APH(4)-Ia	IS15_IS6_unknown-APH(4)-Ia	1055	0	1	1	0
SDPD4TRT1-03	Soil	Environment	Farm	Shandong 4	Shandong	k119_769950	SDPD4TRT1-03_l500.fa-k119_769950	IS15_IS6_unknown	APH(4)-Ia	IS15_IS6_unknown-APH(4)-Ia	1055	0	1	1	0
HAYS1JFT1-8	Broiler faeces	Chicken	Farm	Henan 1	Henan	k119_348675	HAYS1JFT1-8_l500.fa-k119_348675	IS15_IS6_unknown	arr-2	IS15_IS6_unknown-arr-2	2462	0	1	1	0
HAYS2JFT2-14	Broiler faeces	Chicken	Farm	Henan 2	Henan	k119_258322	HAYS2JFT2-14_l500.fa-k119_258322	IS15_IS6_unknown	arr-2	IS15_IS6_unknown-arr-2	614	0	1	1	0
HAYS3JFT2-8	Broiler faeces	Chicken	Farm	Henan 3	Henan	k119_26622	HAYS3JFT2-8_l500.fa-k119_26622	IS15_IS6_unknown	arr-2	IS15_IS6_unknown-arr-2	2462	0	1	1	0
HAYS3JFT1-1	Broiler faeces	Chicken	Farm	Henan 3	Henan	k119_39743	HAYS3JFT1-1_l500.fa-k119_39743	IS15_IS6_unknown	arr-2	IS15_IS6_unknown-arr-2	4184	0	1	1	0
HAYS3JFT1-11	Broiler faeces	Chicken	Farm	Henan 3	Henan	k119_19022	HAYS3JFT1-11_l500.fa-k119_19022	IS15_IS6_unknown	arr-2	IS15_IS6_unknown-arr-2	4184	0	1	1	0
HAYS3JFT2-2	Broiler faeces	Chicken	Farm	Henan 3	Henan	k119_46278	HAYS3JFT2-2_l500.fa-k119_46278	IS15_IS6_unknown	arr-2	IS15_IS6_unknown-arr-2	4184	0	1	1	0
HAYS3JFT2-1	Broiler faeces	Chicken	Farm	Henan 3	Henan	k119_261871	HAYS3JFT2-1_l500.fa-k119_261871	IS15_IS6_unknown	arr-2	IS15_IS6_unknown-arr-2	4184	0	1	1	0
HAYS3JFT1-2	Broiler faeces	Chicken	Farm	Henan 3	Henan	k119_143364	HAYS3JFT1-2_l500.fa-k119_143364	IS15_IS6_unknown	arr-2	IS15_IS6_unknown-arr-2	4184	0	1	1	0
HAYS3JFT1-15	Broiler faeces	Chicken	Farm	Henan 3	Henan	k119_203786	HAYS3JFT1-15_l500.fa-k119_203786	IS15_IS6_unknown	arr-2	IS15_IS6_unknown-arr-2	4496	0	1	1	0
LNPCJFT1_01	Broiler faeces	Chicken	Farm	Liaoning 1	Liaoning	k119_894	LNPCJFT1_01_l500.fa-k119_894	IS15_IS6_unknown	arr-2	IS15_IS6_unknown-arr-2	369	0	1	1	0
LNPCJFT1_04	Broiler faeces	Chicken	Farm	Liaoning 1	Liaoning	k119_8529	LNPCJFT1_04_l500.fa-k119_8529	IS15_IS6_unknown	arr-2	IS15_IS6_unknown-arr-2	1179	0	1	1	0
LNLDJFT1-15	Broiler faeces	Chicken	Farm	Liaoning 3	Liaoning	k119_13094	LNLDJFT1-15_l500.fa-k119_13094	IS15_IS6_unknown	arr-2	IS15_IS6_unknown-arr-2	4184	0	1	1	0
PDJFT1S3L0609	Broiler faeces	Chicken	Farm	Shandong 1_1	Shandong	k119_140461	PDJFT1S3L0609_l500.fa-k119_140461	IS15_IS6_unknown	arr-2	IS15_IS6_unknown-arr-2	369	0	1	1	0
PDJFT2S3L0508	Broiler faeces	Chicken	Farm	Shandong 1_1	Shandong	k119_219765	PDJFT2S3L0508_l500.fa-k119_219765	IS15_IS6_unknown	arr-2	IS15_IS6_unknown-arr-2	2462	0	1	1	0
PDJFT1S3L0405	Broiler faeces	Chicken	Farm	Shandong 1_1	Shandong	k119_140756	PDJFT1S3L0405_l500.fa-k119_140756	IS15_IS6_unknown	arr-2	IS15_IS6_unknown-arr-2	2462	0	1	1	0
PDJFL1C3	Broiler faeces	Chicken	Farm	Shandong 1_2	Shandong	k119_213908	PDJFL1C3_l500.fa-k119_213908	IS15_IS6_unknown	arr-2	IS15_IS6_unknown-arr-2	2462	0	1	1	0
PDJFL1A1	Broiler faeces	Chicken	Farm	Shandong 1_2	Shandong	k119_5702	PDJFL1A1_l500.fa-k119_5702	IS15_IS6_unknown	arr-2	IS15_IS6_unknown-arr-2	2462	0	1	1	0
PDJFL2C5	Broiler faeces	Chicken	Farm	Shandong 1_2	Shandong	k119_264398	PDJFL2C5_l500.fa-k119_264398	IS15_IS6_unknown	arr-2	IS15_IS6_unknown-arr-2	2462	0	1	1	0
PDJFL2C1	Broiler faeces	Chicken	Farm	Shandong 1_2	Shandong	k119_301999	PDJFL2C1_l500.fa-k119_301999	IS15_IS6_unknown	arr-2	IS15_IS6_unknown-arr-2	2462	0	1	1	0
PDJFL1C2	Broiler faeces	Chicken	Farm	Shandong 1_2	Shandong	k119_229747	PDJFL1C2_l500.fa-k119_229747	IS15_IS6_unknown	arr-2	IS15_IS6_unknown-arr-2	4184	0	1	1	0
PDJFL1A6	Broiler faeces	Chicken	Farm	Shandong 1_2	Shandong	k119_14299	PDJFL1A6_l500.fa-k119_14299	IS15_IS6_unknown	arr-2	IS15_IS6_unknown-arr-2	4184	0	1	1	0
PDJFL1A3	Broiler faeces	Chicken	Farm	Shandong 1_2	Shandong	k119_23063	PDJFL1A3_l500.fa-k119_23063	IS15_IS6_unknown	arr-2	IS15_IS6_unknown-arr-2	4184	0	1	1	0
PDJFL1A4	Broiler faeces	Chicken	Farm	Shandong 1_2	Shandong	k119_52577	PDJFL1A4_l500.fa-k119_52577	IS15_IS6_unknown	arr-2	IS15_IS6_unknown-arr-2	4184	0	1	1	0
SDPD1JFT1.06	Broiler faeces	Chicken	Farm	Shandong 2	Shandong	k119_197699	SDPD1JFT1.06_l500.fa-k119_197699	IS15_IS6_unknown	arr-2	IS15_IS6_unknown-arr-2	4184	0	1	1	0
SDPD3TWT3-01	Wastewater	Environment	Slaughterhouse	Shandong 3	Shandong	k119_506218	SDPD3TWT3-01_l500.fa-k119_506218	IS15_IS6_unknown	arr-2	IS15_IS6_unknown-arr-2	4496	0	1	1	0
HAYS1JFT1-5	Broiler faeces	Chicken	Farm	Henan 1	Henan	k119_351847	HAYS1JFT1-5_l500.fa-k119_351847	IS15_IS6_unknown	arr-3	IS15_IS6_unknown-arr-3	2462	0	1	1	0
HAYS1JFT1-1	Broiler faeces	Chicken	Farm	Henan 1	Henan	k119_45662	HAYS1JFT1-1_l500.fa-k119_45662	IS15_IS6_unknown	arr-3	IS15_IS6_unknown-arr-3	2462	0	1	1	0
HAYS1JFT1-7	Broiler faeces	Chicken	Farm	Henan 1	Henan	k119_134359	HAYS1JFT1-7_l500.fa-k119_134359	IS15_IS6_unknown	arr-3	IS15_IS6_unknown-arr-3	2462	0	1	1	0
HAYS2YMT2-5	Broiler Feather	Chicken	Farm	Henan 2	Henan	k119_789306	HAYS2YMT2-5_l500.fa-k119_789306	IS15_IS6_unknown	arr-3	IS15_IS6_unknown-arr-3	2462	0	1	1	0
HAYS2YMT2-1	Broiler Feather	Chicken	Farm	Henan 2	Henan	k119_207144	HAYS2YMT2-1_l500.fa-k119_207144	IS15_IS6_unknown	arr-3	IS15_IS6_unknown-arr-3	2462	0	1	1	0
HAYS3JFT1-3	Broiler faeces	Chicken	Farm	Henan 3	Henan	k119_15090	HAYS3JFT1-3_l500.fa-k119_15090	IS15_IS6_unknown	arr-3	IS15_IS6_unknown-arr-3	2462	0	1	1	0
HAYS3YMT2-4	Broiler Feather	Chicken	Farm	Henan 3	Henan	k119_1382295	HAYS3YMT2-4_l500.fa-k119_1382295	IS15_IS6_unknown	arr-3	IS15_IS6_unknown-arr-3	2462	0	1	1	0
LNTPJFT2_13	Broiler faeces	Chicken	Farm	Liaoning 2	Liaoning	k119_94918	LNTPJFT2_13_l500.fa-k119_94918	IS15_IS6_unknown	arr-3	IS15_IS6_unknown-arr-3	2462	0	1	1	0
LNTPJFT1_19	Broiler faeces	Chicken	Farm	Liaoning 2	Liaoning	k119_202148	LNTPJFT1_19_l500.fa-k119_202148	IS15_IS6_unknown	arr-3	IS15_IS6_unknown-arr-3	2462	0	1	1	0
LNTPJFT2_17	Broiler faeces	Chicken	Farm	Liaoning 2	Liaoning	k119_219996	LNTPJFT2_17_l500.fa-k119_219996	IS15_IS6_unknown	arr-3	IS15_IS6_unknown-arr-3	2462	0	1	1	0
LNLDDMT1-02	Barn Floor	Environment	Farm	Liaoning 3	Liaoning	k119_291500	LNLDDMT1-02_l500.fa-k119_291500	IS15_IS6_unknown	arr-3	IS15_IS6_unknown-arr-3	369	0	1	1	0
PDJFL2C4	Broiler faeces	Chicken	Farm	Shandong 1_2	Shandong	k119_127226	PDJFL2C4_l500.fa-k119_127226	IS15_IS6_unknown	arr-3	IS15_IS6_unknown-arr-3	2462	0	1	1	0
SDPD1JTT3.14	Broiler carcass	Chicken	Slaughterhouse	Shandong 2	Shandong	k119_83892	SDPD1JTT3.14_l500.fa-k119_83892	IS15_IS6_unknown	arr-3	IS15_IS6_unknown-arr-3	2462	0	1	1	0
SDPD1JTT3.15	Broiler carcass	Chicken	Slaughterhouse	Shandong 2	Shandong	k119_500554	SDPD1JTT3.15_l500.fa-k119_500554	IS15_IS6_unknown	arr-3	IS15_IS6_unknown-arr-3	2462	0	1	1	0
SDPD1JFT2.12	Broiler faeces	Chicken	Farm	Shandong 2	Shandong	k119_272836	SDPD1JFT2.12_l500.fa-k119_272836	IS15_IS6_unknown	arr-3	IS15_IS6_unknown-arr-3	2462	0	1	1	0
SDPD1JFT1.02	Broiler faeces	Chicken	Farm	Shandong 2	Shandong	k119_37899	SDPD1JFT1.02_l500.fa-k119_37899	IS15_IS6_unknown	arr-3	IS15_IS6_unknown-arr-3	2462	0	1	1	0
SDPD1JFT1.15	Broiler faeces	Chicken	Farm	Shandong 2	Shandong	k119_242846	SDPD1JFT1.15_l500.fa-k119_242846	IS15_IS6_unknown	arr-3	IS15_IS6_unknown-arr-3	2462	0	1	1	0
SDPD1JFT1.14	Broiler faeces	Chicken	Farm	Shandong 2	Shandong	k119_419261	SDPD1JFT1.14_l500.fa-k119_419261	IS15_IS6_unknown	arr-3	IS15_IS6_unknown-arr-3	4184	0	1	1	0
SDPD3JFT1-03	Broiler faeces	Chicken	Farm	Shandong 3	Shandong	k119_200806	SDPD3JFT1-03_l500.fa-k119_200806	IS15_IS6_unknown	arr-3	IS15_IS6_unknown-arr-3	187	0	1	1	0
HAYS3YMT1-04	Broiler Feather	Chicken	Farm	Henan 3	Henan	k119_333203	HAYS3YMT1-04_l500.fa-k119_333203	IS15_IS6_unknown	CARB-3	IS15_IS6_unknown-CARB-3	181	0	1	1	0
SDPD4JFT2-03	Broiler faeces	Chicken	Farm	Shandong 4	Shandong	k119_11842	SDPD4JFT2-03_l500.fa-k119_11842	IS15_IS6_unknown	CARB-3	IS15_IS6_unknown-CARB-3	784	0	1	1	0
SDPD1JFT1.02	Broiler faeces	Chicken	Farm	Shandong 2	Shandong	k119_36955	SDPD1JFT1.02_l500.fa-k119_36955	IS15_IS6_unknown	catI	IS15_IS6_unknown-catI	146	0	1	1	0
SDPD1JFT1.09	Broiler faeces	Chicken	Farm	Shandong 2	Shandong	k119_62148	SDPD1JFT1.09_l500.fa-k119_62148	IS15_IS6_unknown	catI	IS15_IS6_unknown-catI	146	0	1	1	0
SDPD1JFT1.01	Broiler faeces	Chicken	Farm	Shandong 2	Shandong	k119_139163	SDPD1JFT1.01_l500.fa-k119_139163	IS15_IS6_unknown	catI	IS15_IS6_unknown-catI	146	0	1	1	0
SDPD1JFT1.10	Broiler faeces	Chicken	Farm	Shandong 2	Shandong	k119_72599	SDPD1JFT1.10_l500.fa-k119_72599	IS15_IS6_unknown	catI	IS15_IS6_unknown-catI	146	0	1	1	0
SDPD3HCT2-01	Barn Floor	Environment	Farm	Shandong 3	Shandong	k119_354580	SDPD3HCT2-01_l500.fa-k119_354580	IS15_IS6_unknown	catI	IS15_IS6_unknown-catI	146	0	1	1	0
SDPD4JFT1-08	Broiler faeces	Chicken	Farm	Shandong 4	Shandong	k119_470902	SDPD4JFT1-08_l500.fa-k119_470902	IS15_IS6_unknown	catI	IS15_IS6_unknown-catI	146	0	1	1	0
SDPD4JFT1-18	Broiler faeces	Chicken	Farm	Shandong 4	Shandong	k119_540314	SDPD4JFT1-18_l500.fa-k119_540314	IS15_IS6_unknown	catI	IS15_IS6_unknown-catI	146	0	1	1	0
SDPD4JFT2-01	Broiler faeces	Chicken	Farm	Shandong 4	Shandong	k119_396746	SDPD4JFT2-01_l500.fa-k119_396746	IS15_IS6_unknown	catI	IS15_IS6_unknown-catI	146	0	1	1	0
HAYS1JFT2-2	Broiler faeces	Chicken	Farm	Henan 1	Henan	k119_83495	HAYS1JFT2-2_l500.fa-k119_83495	IS15_IS6_unknown	catII_from_Escherichia_coli_K-12	IS15_IS6_unknown-catII_from_Escherichia_coli_K-12	92	0	1	1	0
HAYS1JFT1-2	Broiler faeces	Chicken	Farm	Henan 1	Henan	k119_3533	HAYS1JFT1-2_l500.fa-k119_3533	IS15_IS6_unknown	catII_from_Escherichia_coli_K-12	IS15_IS6_unknown-catII_from_Escherichia_coli_K-12	667	0	1	1	0
HAYS1JFT1-6	Broiler faeces	Chicken	Farm	Henan 1	Henan	k119_158934	HAYS1JFT1-6_l500.fa-k119_158934	IS15_IS6_unknown	catII_from_Escherichia_coli_K-12	IS15_IS6_unknown-catII_from_Escherichia_coli_K-12	667	0	1	1	0
HAYS2JFT2-4	Broiler faeces	Chicken	Farm	Henan 2	Henan	k119_435986	HAYS2JFT2-4_l500.fa-k119_435986	IS15_IS6_unknown	catII_from_Escherichia_coli_K-12	IS15_IS6_unknown-catII_from_Escherichia_coli_K-12	92	0	1	1	0
HAYS3JFT2-11	Broiler faeces	Chicken	Farm	Henan 3	Henan	k119_279414	HAYS3JFT2-11_l500.fa-k119_279414	IS15_IS6_unknown	catII_from_Escherichia_coli_K-12	IS15_IS6_unknown-catII_from_Escherichia_coli_K-12	667	0	1	1	0
LNPCJFT2_18	Broiler faeces	Chicken	Farm	Liaoning 1	Liaoning	k119_154573	LNPCJFT2_18_l500.fa-k119_154573	IS15_IS6_unknown	catII_from_Escherichia_coli_K-12	IS15_IS6_unknown-catII_from_Escherichia_coli_K-12	92	0	1	1	0
LNPCJFT1_17	Broiler faeces	Chicken	Farm	Liaoning 1	Liaoning	k119_96744	LNPCJFT1_17_l500.fa-k119_96744	IS15_IS6_unknown	catII_from_Escherichia_coli_K-12	IS15_IS6_unknown-catII_from_Escherichia_coli_K-12	667	0	1	1	0
LNPCJFT2_03	Broiler faeces	Chicken	Farm	Liaoning 1	Liaoning	k119_77819	LNPCJFT2_03_l500.fa-k119_77819	IS15_IS6_unknown	catII_from_Escherichia_coli_K-12	IS15_IS6_unknown-catII_from_Escherichia_coli_K-12	667	0	1	1	0
LNPCJFT2_05	Broiler faeces	Chicken	Farm	Liaoning 1	Liaoning	k119_150479	LNPCJFT2_05_l500.fa-k119_150479	IS15_IS6_unknown	catII_from_Escherichia_coli_K-12	IS15_IS6_unknown-catII_from_Escherichia_coli_K-12	667	0	1	1	0
LNPCJFT2_17	Broiler faeces	Chicken	Farm	Liaoning 1	Liaoning	k119_10054	LNPCJFT2_17_l500.fa-k119_10054	IS15_IS6_unknown	catII_from_Escherichia_coli_K-12	IS15_IS6_unknown-catII_from_Escherichia_coli_K-12	667	0	1	1	0
LNPCJFT2_19	Broiler faeces	Chicken	Farm	Liaoning 1	Liaoning	k119_87002	LNPCJFT2_19_l500.fa-k119_87002	IS15_IS6_unknown	catII_from_Escherichia_coli_K-12	IS15_IS6_unknown-catII_from_Escherichia_coli_K-12	667	0	1	1	0
LNTPDMT1_01	Barn Floor	Environment	Farm	Liaoning 2	Liaoning	k119_796605	LNTPDMT1_01_l500.fa-k119_796605	IS15_IS6_unknown	catII_from_Escherichia_coli_K-12	IS15_IS6_unknown-catII_from_Escherichia_coli_K-12	667	0	1	1	0
LNLDDMT1-01	Barn Floor	Environment	Farm	Liaoning 3	Liaoning	k119_336393	LNLDDMT1-01_l500.fa-k119_336393	IS15_IS6_unknown	catII_from_Escherichia_coli_K-12	IS15_IS6_unknown-catII_from_Escherichia_coli_K-12	667	0	1	1	0
LNLDDMT1-02	Barn Floor	Environment	Farm	Liaoning 3	Liaoning	k119_199516	LNLDDMT1-02_l500.fa-k119_199516	IS15_IS6_unknown	catII_from_Escherichia_coli_K-12	IS15_IS6_unknown-catII_from_Escherichia_coli_K-12	667	0	1	1	0
PDJFT1S3L0202	Broiler faeces	Chicken	Farm	Shandong 1_1	Shandong	k119_167541	PDJFT1S3L0202_l500.fa-k119_167541	IS15_IS6_unknown	catII_from_Escherichia_coli_K-12	IS15_IS6_unknown-catII_from_Escherichia_coli_K-12	92	0	1	1	0
PDJFT1S3L0101	Broiler faeces	Chicken	Farm	Shandong 1_1	Shandong	k119_386801	PDJFT1S3L0101_l500.fa-k119_386801	IS15_IS6_unknown	catII_from_Escherichia_coli_K-12	IS15_IS6_unknown-catII_from_Escherichia_coli_K-12	667	0	1	1	0
PDJFT1S4L0515	Broiler faeces	Chicken	Farm	Shandong 1_1	Shandong	k119_29208	PDJFT1S4L0515_l500.fa-k119_29208	IS15_IS6_unknown	catII_from_Escherichia_coli_K-12	IS15_IS6_unknown-catII_from_Escherichia_coli_K-12	667	0	1	1	0
PDJFT1S3L0609	Broiler faeces	Chicken	Farm	Shandong 1_1	Shandong	k119_312412	PDJFT1S3L0609_l500.fa-k119_312412	IS15_IS6_unknown	catII_from_Escherichia_coli_K-12	IS15_IS6_unknown-catII_from_Escherichia_coli_K-12	667	0	1	1	0
PDJFL1C3	Broiler faeces	Chicken	Farm	Shandong 1_2	Shandong	k119_317635	PDJFL1C3_l500.fa-k119_317635	IS15_IS6_unknown	catII_from_Escherichia_coli_K-12	IS15_IS6_unknown-catII_from_Escherichia_coli_K-12	92	0	1	1	0
SDPD3JFT1-13	Broiler faeces	Chicken	Farm	Shandong 3	Shandong	k119_122963	SDPD3JFT1-13_l500.fa-k119_122963	IS15_IS6_unknown	catII_from_Escherichia_coli_K-12	IS15_IS6_unknown-catII_from_Escherichia_coli_K-12	667	0	1	1	0
SDPD4JFT1-18	Broiler faeces	Chicken	Farm	Shandong 4	Shandong	k119_902616	SDPD4JFT1-18_l500.fa-k119_902616	IS15_IS6_unknown	catII_from_Escherichia_coli_K-12	IS15_IS6_unknown-catII_from_Escherichia_coli_K-12	92	0	1	1	0
SDPD4JFT2-13	Broiler faeces	Chicken	Farm	Shandong 4	Shandong	k119_625705	SDPD4JFT2-13_l500.fa-k119_625705	IS15_IS6_unknown	catII_from_Escherichia_coli_K-12	IS15_IS6_unknown-catII_from_Escherichia_coli_K-12	92	0	1	1	0
HAYS1JFT1-6	Broiler faeces	Chicken	Farm	Henan 1	Henan	k119_9829	HAYS1JFT1-6_l500.fa-k119_9829	IS15_IS6_unknown	CTX-M-14	IS15_IS6_unknown-CTX-M-14	2786	0	1	1	0
HAYS3JFT2-9	Broiler faeces	Chicken	Farm	Henan 3	Henan	k119_335447	HAYS3JFT2-9_l500.fa-k119_335447	IS15_IS6_unknown	CTX-M-14	IS15_IS6_unknown-CTX-M-14	2704	0	1	1	0
HAYS3YMT2-1	Broiler Feather	Chicken	Farm	Henan 3	Henan	k119_130171	HAYS3YMT2-1_l500.fa-k119_130171	IS15_IS6_unknown	CTX-M-14	IS15_IS6_unknown-CTX-M-14	2757	0	1	1	0
LNTPJFT2_05	Broiler faeces	Chicken	Farm	Liaoning 2	Liaoning	k119_561928	LNTPJFT2_05_l500.fa-k119_561928	IS15_IS6_unknown	CTX-M-14	IS15_IS6_unknown-CTX-M-14	2757	0	1	1	0
LNTPJFT2_09	Broiler faeces	Chicken	Farm	Liaoning 2	Liaoning	k119_237271	LNTPJFT2_09_l500.fa-k119_237271	IS15_IS6_unknown	CTX-M-14	IS15_IS6_unknown-CTX-M-14	2757	0	1	1	0
LNTPJFT2_17	Broiler faeces	Chicken	Farm	Liaoning 2	Liaoning	k119_478774	LNTPJFT2_17_l500.fa-k119_478774	IS15_IS6_unknown	CTX-M-14	IS15_IS6_unknown-CTX-M-14	3310	0	1	1	0
PDJFT2S4L0616	Broiler faeces	Chicken	Farm	Shandong 1_1	Shandong	k119_386	PDJFT2S4L0616_l500.fa-k119_386	IS15_IS6_unknown	CTX-M-14	IS15_IS6_unknown-CTX-M-14	2251	0	1	1	0
SDPD1JFT2.02	Broiler faeces	Chicken	Farm	Shandong 2	Shandong	k119_260777	SDPD1JFT2.02_l500.fa-k119_260777	IS15_IS6_unknown	CTX-M-14	IS15_IS6_unknown-CTX-M-14	1010	0	1	1	0
SDPD3JFT2-01	Broiler faeces	Chicken	Farm	Shandong 3	Shandong	k119_19125	SDPD3JFT2-01_l500.fa-k119_19125	IS15_IS6_unknown	CTX-M-14	IS15_IS6_unknown-CTX-M-14	2866	0	1	1	0
HAYS1JFT1-3	Broiler faeces	Chicken	Farm	Henan 1	Henan	k119_138715	HAYS1JFT1-3_l500.fa-k119_138715	IS15_IS6_unknown	CTX-M-65	IS15_IS6_unknown-CTX-M-65	1421	0	1	1	0
HAYS2JFT1-13	Broiler faeces	Chicken	Farm	Henan 2	Henan	k119_254476	HAYS2JFT1-13_l500.fa-k119_254476	IS15_IS6_unknown	CTX-M-65	IS15_IS6_unknown-CTX-M-65	1632	0	1	1	0
HAYS2JFT1-15	Broiler faeces	Chicken	Farm	Henan 2	Henan	k119_20323	HAYS2JFT1-15_l500.fa-k119_20323	IS15_IS6_unknown	CTX-M-65	IS15_IS6_unknown-CTX-M-65	1676	0	1	1	0
HAYS2JFT2-11	Broiler faeces	Chicken	Farm	Henan 2	Henan	k119_27243	HAYS2JFT2-11_l500.fa-k119_27243	IS15_IS6_unknown	CTX-M-65	IS15_IS6_unknown-CTX-M-65	1676	0	1	1	0
PDJFT2S4L0820	Broiler faeces	Chicken	Farm	Shandong 1_1	Shandong	k119_145923	PDJFT2S4L0820_l500.fa-k119_145923	IS15_IS6_unknown	CTX-M-65	IS15_IS6_unknown-CTX-M-65	448	0	1	1	0
PDJFL2A1	Broiler faeces	Chicken	Farm	Shandong 1_2	Shandong	k119_115793	PDJFL2A1_l500.fa-k119_115793	IS15_IS6_unknown	CTX-M-65	IS15_IS6_unknown-CTX-M-65	1632	0	1	1	0
PDJFL2C1	Broiler faeces	Chicken	Farm	Shandong 1_2	Shandong	k119_302013	PDJFL2C1_l500.fa-k119_302013	IS15_IS6_unknown	CTX-M-65	IS15_IS6_unknown-CTX-M-65	1632	0	1	1	0
SDPD3JFT2-03	Broiler faeces	Chicken	Farm	Shandong 3	Shandong	k119_9560	SDPD3JFT2-03_l500.fa-k119_9560	IS15_IS6_unknown	CTX-M-65	IS15_IS6_unknown-CTX-M-65	1632	0	1	1	0
SDPD4JFT2-01	Broiler faeces	Chicken	Farm	Shandong 4	Shandong	k119_511693	SDPD4JFT2-01_l500.fa-k119_511693	IS15_IS6_unknown	CTX-M-65	IS15_IS6_unknown-CTX-M-65	1632	0	1	1	0
HAYS1JFT2-3	Broiler faeces	Chicken	Farm	Henan 1	Henan	k119_365150	HAYS1JFT2-3_l500.fa-k119_365150	IS15_IS6_unknown	determinant_of_bleomycin_resistance	IS15_IS6_unknown-determinant_of_bleomycin_resistance	1048	0	1	1	0
HAYS1JFT2-2	Broiler faeces	Chicken	Farm	Henan 1	Henan	k119_59995	HAYS1JFT2-2_l500.fa-k119_59995	IS15_IS6_unknown	determinant_of_bleomycin_resistance	IS15_IS6_unknown-determinant_of_bleomycin_resistance	1048	0	1	1	0
HAYS1JFT1-5	Broiler faeces	Chicken	Farm	Henan 1	Henan	k119_214434	HAYS1JFT1-5_l500.fa-k119_214434	IS15_IS6_unknown	determinant_of_bleomycin_resistance	IS15_IS6_unknown-determinant_of_bleomycin_resistance	1820	0	1	1	0
HAYS1JFT1-6	Broiler faeces	Chicken	Farm	Henan 1	Henan	k119_143930	HAYS1JFT1-6_l500.fa-k119_143930	IS15_IS6_unknown	determinant_of_bleomycin_resistance	IS15_IS6_unknown-determinant_of_bleomycin_resistance	1820	0	1	1	0
HAYS3HCT2-2	Barn Floor	Environment	Farm	Henan 3	Henan	k119_845149	HAYS3HCT2-2_l500.fa-k119_845149	IS15_IS6_unknown	determinant_of_bleomycin_resistance	IS15_IS6_unknown-determinant_of_bleomycin_resistance	1820	0	1	1	0
HAYS3JFT1-14	Broiler faeces	Chicken	Farm	Henan 3	Henan	k119_137488	HAYS3JFT1-14_l500.fa-k119_137488	IS15_IS6_unknown	determinant_of_bleomycin_resistance	IS15_IS6_unknown-determinant_of_bleomycin_resistance	1820	0	1	1	0
HAYS3YMT2-3	Broiler Feather	Chicken	Farm	Henan 3	Henan	k119_996794	HAYS3YMT2-3_l500.fa-k119_996794	IS15_IS6_unknown	determinant_of_bleomycin_resistance	IS15_IS6_unknown-determinant_of_bleomycin_resistance	1820	0	1	1	0
LNPCJFT1_08	Broiler faeces	Chicken	Farm	Liaoning 1	Liaoning	k119_401593	LNPCJFT1_08_l500.fa-k119_401593	IS15_IS6_unknown	determinant_of_bleomycin_resistance	IS15_IS6_unknown-determinant_of_bleomycin_resistance	907	0	1	1	0
LNPCJFT2_11	Broiler faeces	Chicken	Farm	Liaoning 1	Liaoning	k119_153373	LNPCJFT2_11_l500.fa-k119_153373	IS15_IS6_unknown	determinant_of_bleomycin_resistance	IS15_IS6_unknown-determinant_of_bleomycin_resistance	1820	0	1	1	0
LNPCJFT1_17	Broiler faeces	Chicken	Farm	Liaoning 1	Liaoning	k119_2717	LNPCJFT1_17_l500.fa-k119_2717	IS15_IS6_unknown	determinant_of_bleomycin_resistance	IS15_IS6_unknown-determinant_of_bleomycin_resistance	1820	0	1	1	0
LNPCJFT2_10	Broiler faeces	Chicken	Farm	Liaoning 1	Liaoning	k119_732063	LNPCJFT2_10_l500.fa-k119_732063	IS15_IS6_unknown	determinant_of_bleomycin_resistance	IS15_IS6_unknown-determinant_of_bleomycin_resistance	1820	0	1	1	0
LNPCJFT2_17	Broiler faeces	Chicken	Farm	Liaoning 1	Liaoning	k119_10123	LNPCJFT2_17_l500.fa-k119_10123	IS15_IS6_unknown	determinant_of_bleomycin_resistance	IS15_IS6_unknown-determinant_of_bleomycin_resistance	1820	0	1	1	0
LNLDDMT1-01	Barn Floor	Environment	Farm	Liaoning 3	Liaoning	k119_226436	LNLDDMT1-01_l500.fa-k119_226436	IS15_IS6_unknown	determinant_of_bleomycin_resistance	IS15_IS6_unknown-determinant_of_bleomycin_resistance	1820	0	1	1	0
LNLDDMT1-02	Barn Floor	Environment	Farm	Liaoning 3	Liaoning	k119_373660	LNLDDMT1-02_l500.fa-k119_373660	IS15_IS6_unknown	determinant_of_bleomycin_resistance	IS15_IS6_unknown-determinant_of_bleomycin_resistance	1820	0	1	1	0
SDPD1JFT1.15	Broiler faeces	Chicken	Farm	Shandong 2	Shandong	k119_544104	SDPD1JFT1.15_l500.fa-k119_544104	IS15_IS6_unknown	determinant_of_bleomycin_resistance	IS15_IS6_unknown-determinant_of_bleomycin_resistance	1048	0	1	1	0
SDPD1JFT1.08	Broiler faeces	Chicken	Farm	Shandong 2	Shandong	k119_59734	SDPD1JFT1.08_l500.fa-k119_59734	IS15_IS6_unknown	determinant_of_bleomycin_resistance	IS15_IS6_unknown-determinant_of_bleomycin_resistance	1820	0	1	1	0
SDPD1JFT1.06	Broiler faeces	Chicken	Farm	Shandong 2	Shandong	k119_95797	SDPD1JFT1.06_l500.fa-k119_95797	IS15_IS6_unknown	determinant_of_bleomycin_resistance	IS15_IS6_unknown-determinant_of_bleomycin_resistance	1820	0	1	1	0
SDPD1JFT2.01	Broiler faeces	Chicken	Farm	Shandong 2	Shandong	k119_78060	SDPD1JFT2.01_l500.fa-k119_78060	IS15_IS6_unknown	determinant_of_bleomycin_resistance	IS15_IS6_unknown-determinant_of_bleomycin_resistance	1820	0	1	1	0
SDPD1JFT1.07	Broiler faeces	Chicken	Farm	Shandong 2	Shandong	k119_68357	SDPD1JFT1.07_l500.fa-k119_68357	IS15_IS6_unknown	determinant_of_bleomycin_resistance	IS15_IS6_unknown-determinant_of_bleomycin_resistance	1820	0	1	1	0
SDPD3JFT1-13	Broiler faeces	Chicken	Farm	Shandong 3	Shandong	k119_110961	SDPD3JFT1-13_l500.fa-k119_110961	IS15_IS6_unknown	determinant_of_bleomycin_resistance	IS15_IS6_unknown-determinant_of_bleomycin_resistance	1048	0	1	1	0
HAYS1JFT1-5	Broiler faeces	Chicken	Farm	Henan 1	Henan	k119_351847	HAYS1JFT1-5_l500.fa-k119_351847	IS15_IS6_unknown	dfrA27	IS15_IS6_unknown-dfrA27	3047	0	1	1	0
HAYS1JFT1-1	Broiler faeces	Chicken	Farm	Henan 1	Henan	k119_45662	HAYS1JFT1-1_l500.fa-k119_45662	IS15_IS6_unknown	dfrA27	IS15_IS6_unknown-dfrA27	3047	0	1	1	0
HAYS1JFT1-7	Broiler faeces	Chicken	Farm	Henan 1	Henan	k119_134359	HAYS1JFT1-7_l500.fa-k119_134359	IS15_IS6_unknown	dfrA27	IS15_IS6_unknown-dfrA27	3047	0	1	1	0
HAYS2YMT1-3	Broiler Feather	Chicken	Farm	Henan 2	Henan	k119_655244	HAYS2YMT1-3_l500.fa-k119_655244	IS15_IS6_unknown	dfrA27	IS15_IS6_unknown-dfrA27	1	0	1	1	0
HAYS3JFT1-2	Broiler faeces	Chicken	Farm	Henan 3	Henan	k119_149033	HAYS3JFT1-2_l500.fa-k119_149033	IS15_IS6_unknown	dfrA27	IS15_IS6_unknown-dfrA27	143	0	1	1	0
LNLDDMT1-02	Barn Floor	Environment	Farm	Liaoning 3	Liaoning	k119_291500	LNLDDMT1-02_l500.fa-k119_291500	IS15_IS6_unknown	dfrA27	IS15_IS6_unknown-dfrA27	954	0	1	1	0
HAYS1JFT1-2	Broiler faeces	Chicken	Farm	Henan 1	Henan	k119_89818	HAYS1JFT1-2_l500.fa-k119_89818	IS15_IS6_unknown	Erm(42)	IS15_IS6_unknown-Erm(42)	331	0	1	1	0
HAYS1JFT2-2	Broiler faeces	Chicken	Farm	Henan 1	Henan	k119_26294	HAYS1JFT2-2_l500.fa-k119_26294	IS15_IS6_unknown	Erm(42)	IS15_IS6_unknown-Erm(42)	331	0	1	1	0
HAYS1JFT2-7	Broiler faeces	Chicken	Farm	Henan 1	Henan	k119_435112	HAYS1JFT2-7_l500.fa-k119_435112	IS15_IS6_unknown	Erm(42)	IS15_IS6_unknown-Erm(42)	331	0	1	1	0
HAYS1JFT2-8	Broiler faeces	Chicken	Farm	Henan 1	Henan	k119_33916	HAYS1JFT2-8_l500.fa-k119_33916	IS15_IS6_unknown	Erm(42)	IS15_IS6_unknown-Erm(42)	331	0	1	1	0
HAYS2YMT2-1	Broiler Feather	Chicken	Farm	Henan 2	Henan	k119_526439	HAYS2YMT2-1_l500.fa-k119_526439	IS15_IS6_unknown	Erm(42)	IS15_IS6_unknown-Erm(42)	331	0	1	1	0
HAYS2YMT2-5	Broiler Feather	Chicken	Farm	Henan 2	Henan	k119_667696	HAYS2YMT2-5_l500.fa-k119_667696	IS15_IS6_unknown	Erm(42)	IS15_IS6_unknown-Erm(42)	331	0	1	1	0
HAYS2YMT2-3	Broiler Feather	Chicken	Farm	Henan 2	Henan	k119_624817	HAYS2YMT2-3_l500.fa-k119_624817	IS15_IS6_unknown	Erm(42)	IS15_IS6_unknown-Erm(42)	600	0	1	1	0
HAYS3JFT1-12	Broiler faeces	Chicken	Farm	Henan 3	Henan	k119_9961	HAYS3JFT1-12_l500.fa-k119_9961	IS15_IS6_unknown	Erm(42)	IS15_IS6_unknown-Erm(42)	331	0	1	1	0
HAYS3JFT1-13	Broiler faeces	Chicken	Farm	Henan 3	Henan	k119_16219	HAYS3JFT1-13_l500.fa-k119_16219	IS15_IS6_unknown	Erm(42)	IS15_IS6_unknown-Erm(42)	331	0	1	1	0
HAYS3JFT1-4	Broiler faeces	Chicken	Farm	Henan 3	Henan	k119_21589	HAYS3JFT1-4_l500.fa-k119_21589	IS15_IS6_unknown	Erm(42)	IS15_IS6_unknown-Erm(42)	331	0	1	1	0
HAYS3JFT1-8	Broiler faeces	Chicken	Farm	Henan 3	Henan	k119_271584	HAYS3JFT1-8_l500.fa-k119_271584	IS15_IS6_unknown	Erm(42)	IS15_IS6_unknown-Erm(42)	331	0	1	1	0
HAYS3JFT2-8	Broiler faeces	Chicken	Farm	Henan 3	Henan	k119_123691	HAYS3JFT2-8_l500.fa-k119_123691	IS15_IS6_unknown	Erm(42)	IS15_IS6_unknown-Erm(42)	331	0	1	1	0
HAYS3JFT1-15	Broiler faeces	Chicken	Farm	Henan 3	Henan	k119_192911	HAYS3JFT1-15_l500.fa-k119_192911	IS15_IS6_unknown	Erm(42)	IS15_IS6_unknown-Erm(42)	331	0	1	1	0
HAYS3JFT2-11	Broiler faeces	Chicken	Farm	Henan 3	Henan	k119_153857	HAYS3JFT2-11_l500.fa-k119_153857	IS15_IS6_unknown	Erm(42)	IS15_IS6_unknown-Erm(42)	331	0	1	1	0
HAYS3YMT1-03	Broiler Feather	Chicken	Farm	Henan 3	Henan	k119_437474	HAYS3YMT1-03_l500.fa-k119_437474	IS15_IS6_unknown	Erm(42)	IS15_IS6_unknown-Erm(42)	331	0	1	1	0
HAYS3YMT1-04	Broiler Feather	Chicken	Farm	Henan 3	Henan	k119_634418	HAYS3YMT1-04_l500.fa-k119_634418	IS15_IS6_unknown	Erm(42)	IS15_IS6_unknown-Erm(42)	331	0	1	1	0
HAYS3YMT1-01	Broiler Feather	Chicken	Farm	Henan 3	Henan	k119_398565	HAYS3YMT1-01_l500.fa-k119_398565	IS15_IS6_unknown	Erm(42)	IS15_IS6_unknown-Erm(42)	331	0	1	1	0
LNPCJFT2_03	Broiler faeces	Chicken	Farm	Liaoning 1	Liaoning	k119_77723	LNPCJFT2_03_l500.fa-k119_77723	IS15_IS6_unknown	Erm(42)	IS15_IS6_unknown-Erm(42)	331	0	1	1	0
LNPCJFT2_05	Broiler faeces	Chicken	Farm	Liaoning 1	Liaoning	k119_90655	LNPCJFT2_05_l500.fa-k119_90655	IS15_IS6_unknown	Erm(42)	IS15_IS6_unknown-Erm(42)	331	0	1	1	0
LNPCJFT2_07	Broiler faeces	Chicken	Farm	Liaoning 1	Liaoning	k119_113698	LNPCJFT2_07_l500.fa-k119_113698	IS15_IS6_unknown	Erm(42)	IS15_IS6_unknown-Erm(42)	331	0	1	1	0
LNPCJFT2_09	Broiler faeces	Chicken	Farm	Liaoning 1	Liaoning	k119_479068	LNPCJFT2_09_l500.fa-k119_479068	IS15_IS6_unknown	Erm(42)	IS15_IS6_unknown-Erm(42)	331	0	1	1	0
LNPCJFT2_18	Broiler faeces	Chicken	Farm	Liaoning 1	Liaoning	k119_35644	LNPCJFT2_18_l500.fa-k119_35644	IS15_IS6_unknown	Erm(42)	IS15_IS6_unknown-Erm(42)	331	0	1	1	0
LNPCJFT2_19	Broiler faeces	Chicken	Farm	Liaoning 1	Liaoning	k119_57646	LNPCJFT2_19_l500.fa-k119_57646	IS15_IS6_unknown	Erm(42)	IS15_IS6_unknown-Erm(42)	331	0	1	1	0
LNPCJFT2_13	Broiler faeces	Chicken	Farm	Liaoning 1	Liaoning	k119_3921	LNPCJFT2_13_l500.fa-k119_3921	IS15_IS6_unknown	Erm(42)	IS15_IS6_unknown-Erm(42)	331	0	1	1	0
LNPCJFT1_17	Broiler faeces	Chicken	Farm	Liaoning 1	Liaoning	k119_67966	LNPCJFT1_17_l500.fa-k119_67966	IS15_IS6_unknown	Erm(42)	IS15_IS6_unknown-Erm(42)	403	0	1	1	0
LNTPJFT2_13	Broiler faeces	Chicken	Farm	Liaoning 2	Liaoning	k119_69426	LNTPJFT2_13_l500.fa-k119_69426	IS15_IS6_unknown	Erm(42)	IS15_IS6_unknown-Erm(42)	331	0	1	1	0
LNLDJFT1-03	Broiler faeces	Chicken	Farm	Liaoning 3	Liaoning	k119_406553	LNLDJFT1-03_l500.fa-k119_406553	IS15_IS6_unknown	Erm(42)	IS15_IS6_unknown-Erm(42)	95	0	1	1	0
LNLDJFT1-07	Broiler faeces	Chicken	Farm	Liaoning 3	Liaoning	k119_541592	LNLDJFT1-07_l500.fa-k119_541592	IS15_IS6_unknown	Erm(42)	IS15_IS6_unknown-Erm(42)	281	0	1	1	0
SDPD1JTT3.15	Broiler carcass	Chicken	Slaughterhouse	Shandong 2	Shandong	k119_147241	SDPD1JTT3.15_l500.fa-k119_147241	IS15_IS6_unknown	Erm(42)	IS15_IS6_unknown-Erm(42)	600	0	1	1	0
SDPD1JFT1.15	Broiler faeces	Chicken	Farm	Shandong 2	Shandong	k119_302752	SDPD1JFT1.15_l500.fa-k119_302752	IS15_IS6_unknown	Erm(42)	IS15_IS6_unknown-Erm(42)	331	0	1	1	0
SDPD1JFT2.12	Broiler faeces	Chicken	Farm	Shandong 2	Shandong	k119_503837	SDPD1JFT2.12_l500.fa-k119_503837	IS15_IS6_unknown	Erm(42)	IS15_IS6_unknown-Erm(42)	600	0	1	1	0
SDPD1JFT2.14	Broiler faeces	Chicken	Farm	Shandong 2	Shandong	k119_539365	SDPD1JFT2.14_l500.fa-k119_539365	IS15_IS6_unknown	Erm(42)	IS15_IS6_unknown-Erm(42)	600	0	1	1	0
SDPD1YMT2.05	Broiler Feather	Chicken	Farm	Shandong 2	Shandong	k119_641297	SDPD1YMT2.05_l500.fa-k119_641297	IS15_IS6_unknown	Erm(42)	IS15_IS6_unknown-Erm(42)	600	0	1	1	0
SDPD3JFT1-13	Broiler faeces	Chicken	Farm	Shandong 3	Shandong	k119_42838	SDPD3JFT1-13_l500.fa-k119_42838	IS15_IS6_unknown	Erm(42)	IS15_IS6_unknown-Erm(42)	331	0	1	1	0
SDPD3JFT1-20	Broiler faeces	Chicken	Farm	Shandong 3	Shandong	k119_16050	SDPD3JFT1-20_l500.fa-k119_16050	IS15_IS6_unknown	Erm(42)	IS15_IS6_unknown-Erm(42)	331	0	1	1	0
SDPD4YMT1-05	Broiler Feather	Chicken	Farm	Shandong 4	Shandong	k119_658184	SDPD4YMT1-05_l500.fa-k119_658184	IS15_IS6_unknown	Erm(42)	IS15_IS6_unknown-Erm(42)	195	0	1	1	0
HAYS1JFT1-5	Broiler faeces	Chicken	Farm	Henan 1	Henan	k119_411225	HAYS1JFT1-5_l500.fa-k119_411225	IS15_IS6_unknown	LAP-2	IS15_IS6_unknown-LAP-2	3890	0	1	1	0
HAYS1JFT1-7	Broiler faeces	Chicken	Farm	Henan 1	Henan	k119_47415	HAYS1JFT1-7_l500.fa-k119_47415	IS15_IS6_unknown	LAP-2	IS15_IS6_unknown-LAP-2	3890	0	1	1	0
HAYS1JFT2-1	Broiler faeces	Chicken	Farm	Henan 1	Henan	k119_196721	HAYS1JFT2-1_l500.fa-k119_196721	IS15_IS6_unknown	mphE	IS15_IS6_unknown-mphE	1718	0	1	1	0
HAYS1JFT2-4	Broiler faeces	Chicken	Farm	Henan 1	Henan	k119_72647	HAYS1JFT2-4_l500.fa-k119_72647	IS15_IS6_unknown	mphE	IS15_IS6_unknown-mphE	1718	0	1	1	0
HAYS1JFT1-5	Broiler faeces	Chicken	Farm	Henan 1	Henan	k119_354598	HAYS1JFT1-5_l500.fa-k119_354598	IS15_IS6_unknown	mphE	IS15_IS6_unknown-mphE	1718	0	1	1	0
HAYS1JFT1-1	Broiler faeces	Chicken	Farm	Henan 1	Henan	k119_55179	HAYS1JFT1-1_l500.fa-k119_55179	IS15_IS6_unknown	mphE	IS15_IS6_unknown-mphE	1718	0	1	1	0
HAYS2YMT2-5	Broiler Feather	Chicken	Farm	Henan 2	Henan	k119_421386	HAYS2YMT2-5_l500.fa-k119_421386	IS15_IS6_unknown	mphE	IS15_IS6_unknown-mphE	1718	0	1	1	0
HAYS2YMT1-5	Broiler Feather	Chicken	Farm	Henan 2	Henan	k119_118270	HAYS2YMT1-5_l500.fa-k119_118270	IS15_IS6_unknown	mphE	IS15_IS6_unknown-mphE	1718	0	1	1	0
HAYS2YMT1-1	Broiler Feather	Chicken	Farm	Henan 2	Henan	k119_664850	HAYS2YMT1-1_l500.fa-k119_664850	IS15_IS6_unknown	mphE	IS15_IS6_unknown-mphE	1929	0	1	1	0
HAYS3JTT3-11	Broiler carcass	Chicken	Slaughterhouse	Henan 3	Henan	k119_34758	HAYS3JTT3-11_l500.fa-k119_34758	IS15_IS6_unknown	mphE	IS15_IS6_unknown-mphE	1929	0	1	1	0
HAYS3JFT2-11	Broiler faeces	Chicken	Farm	Henan 3	Henan	k119_43867	HAYS3JFT2-11_l500.fa-k119_43867	IS15_IS6_unknown	mphE	IS15_IS6_unknown-mphE	1718	0	1	1	0
HAYS3JFT1-8	Broiler faeces	Chicken	Farm	Henan 3	Henan	k119_1813708	HAYS3JFT1-8_l500.fa-k119_1813708	IS15_IS6_unknown	mphE	IS15_IS6_unknown-mphE	1718	0	1	1	0
HAYS3YMT2-3	Broiler Feather	Chicken	Farm	Henan 3	Henan	k119_926466	HAYS3YMT2-3_l500.fa-k119_926466	IS15_IS6_unknown	mphE	IS15_IS6_unknown-mphE	1718	0	1	1	0
HAYS3YMT2-4	Broiler Feather	Chicken	Farm	Henan 3	Henan	k119_1056809	HAYS3YMT2-4_l500.fa-k119_1056809	IS15_IS6_unknown	mphE	IS15_IS6_unknown-mphE	1718	0	1	1	0
LNPCJFT2_05	Broiler faeces	Chicken	Farm	Liaoning 1	Liaoning	k119_93949	LNPCJFT2_05_l500.fa-k119_93949	IS15_IS6_unknown	mphE	IS15_IS6_unknown-mphE	1694	0	1	1	0
LNPCJFT2_18	Broiler faeces	Chicken	Farm	Liaoning 1	Liaoning	k119_128752	LNPCJFT2_18_l500.fa-k119_128752	IS15_IS6_unknown	mphE	IS15_IS6_unknown-mphE	1694	0	1	1	0
LNPCJFT2_03	Broiler faeces	Chicken	Farm	Liaoning 1	Liaoning	k119_186084	LNPCJFT2_03_l500.fa-k119_186084	IS15_IS6_unknown	mphE	IS15_IS6_unknown-mphE	1718	0	1	1	0
LNPCJFT2_11	Broiler faeces	Chicken	Farm	Liaoning 1	Liaoning	k119_344689	LNPCJFT2_11_l500.fa-k119_344689	IS15_IS6_unknown	mphE	IS15_IS6_unknown-mphE	1718	0	1	1	0
LNPCJFT2_17	Broiler faeces	Chicken	Farm	Liaoning 1	Liaoning	k119_10022	LNPCJFT2_17_l500.fa-k119_10022	IS15_IS6_unknown	mphE	IS15_IS6_unknown-mphE	1718	0	1	1	0
LNPCJFT2_19	Broiler faeces	Chicken	Farm	Liaoning 1	Liaoning	k119_187606	LNPCJFT2_19_l500.fa-k119_187606	IS15_IS6_unknown	mphE	IS15_IS6_unknown-mphE	1718	0	1	1	0
LNPCJFT1_03	Broiler faeces	Chicken	Farm	Liaoning 1	Liaoning	k119_646389	LNPCJFT1_03_l500.fa-k119_646389	IS15_IS6_unknown	mphE	IS15_IS6_unknown-mphE	1929	0	1	1	0
LNPCJFT1_08	Broiler faeces	Chicken	Farm	Liaoning 1	Liaoning	k119_278415	LNPCJFT1_08_l500.fa-k119_278415	IS15_IS6_unknown	mphE	IS15_IS6_unknown-mphE	1929	0	1	1	0
LNPCJFT2_07	Broiler faeces	Chicken	Farm	Liaoning 1	Liaoning	k119_292359	LNPCJFT2_07_l500.fa-k119_292359	IS15_IS6_unknown	mphE	IS15_IS6_unknown-mphE	1929	0	1	1	0
LNPCJFT2_01	Broiler faeces	Chicken	Farm	Liaoning 1	Liaoning	k119_890530	LNPCJFT2_01_l500.fa-k119_890530	IS15_IS6_unknown	mphE	IS15_IS6_unknown-mphE	1929	0	1	1	0
LNTPDMT2_03	Barn Floor	Environment	Farm	Liaoning 2	Liaoning	k119_277798	LNTPDMT2_03_l500.fa-k119_277798	IS15_IS6_unknown	mphE	IS15_IS6_unknown-mphE	1929	0	1	1	0
LNLDDMT2-02	Barn Floor	Environment	Farm	Liaoning 3	Liaoning	k119_29081	LNLDDMT2-02_l500.fa-k119_29081	IS15_IS6_unknown	mphE	IS15_IS6_unknown-mphE	1929	0	1	1	0
LNLHJTT3-13	Broiler carcass	Chicken	Slaughterhouse	Liaoning 3	Liaoning	k119_115662	LNLHJTT3-13_l500.fa-k119_115662	IS15_IS6_unknown	mphE	IS15_IS6_unknown-mphE	1929	0	1	1	0
LNLDJFT2-12	Broiler faeces	Chicken	Farm	Liaoning 3	Liaoning	k119_472547	LNLDJFT2-12_l500.fa-k119_472547	IS15_IS6_unknown	mphE	IS15_IS6_unknown-mphE	1929	0	1	1	0
PDJFT1S4L0515	Broiler faeces	Chicken	Farm	Shandong 1_1	Shandong	k119_41972	PDJFT1S4L0515_l500.fa-k119_41972	IS15_IS6_unknown	mphE	IS15_IS6_unknown-mphE	1718	0	1	1	0
PDTRT2S404	Soil	Environment	Farm	Shandong 1_1	Shandong	k119_1007647	PDTRT2S404_l500.fa-k119_1007647	IS15_IS6_unknown	mphE	IS15_IS6_unknown-mphE	1929	0	1	1	0
PDJFL1C3	Broiler faeces	Chicken	Farm	Shandong 1_2	Shandong	k119_72298	PDJFL1C3_l500.fa-k119_72298	IS15_IS6_unknown	mphE	IS15_IS6_unknown-mphE	1499	0	1	1	0
SDPD1JTT3.14	Broiler carcass	Chicken	Slaughterhouse	Shandong 2	Shandong	k119_302666	SDPD1JTT3.14_l500.fa-k119_302666	IS15_IS6_unknown	mphE	IS15_IS6_unknown-mphE	1718	0	1	1	0
SDPD1JFT1.10	Broiler faeces	Chicken	Farm	Shandong 2	Shandong	k119_20831	SDPD1JFT1.10_l500.fa-k119_20831	IS15_IS6_unknown	mphE	IS15_IS6_unknown-mphE	1718	0	1	1	0
SDPD1YMT1.04	Broiler Feather	Chicken	Farm	Shandong 2	Shandong	k119_557590	SDPD1YMT1.04_l500.fa-k119_557590	IS15_IS6_unknown	mphE	IS15_IS6_unknown-mphE	474	0	1	1	0
SDPD1YMT2.04	Broiler Feather	Chicken	Farm	Shandong 2	Shandong	k119_438629	SDPD1YMT2.04_l500.fa-k119_438629	IS15_IS6_unknown	mphE	IS15_IS6_unknown-mphE	1718	0	1	1	0
SDPD3JFT1-13	Broiler faeces	Chicken	Farm	Shandong 3	Shandong	k119_212355	SDPD3JFT1-13_l500.fa-k119_212355	IS15_IS6_unknown	mphE	IS15_IS6_unknown-mphE	1718	0	1	1	0
SDPD4JFT2-07	Broiler faeces	Chicken	Farm	Shandong 4	Shandong	k119_428954	SDPD4JFT2-07_l500.fa-k119_428954	IS15_IS6_unknown	mphE	IS15_IS6_unknown-mphE	1155	0	1	1	0
SDPD4JFT2-01	Broiler faeces	Chicken	Farm	Shandong 4	Shandong	k119_541524	SDPD4JFT2-01_l500.fa-k119_541524	IS15_IS6_unknown	mphE	IS15_IS6_unknown-mphE	1929	0	1	1	0
SDPD4JFT2-09	Broiler faeces	Chicken	Farm	Shandong 4	Shandong	k119_542220	SDPD4JFT2-09_l500.fa-k119_542220	IS15_IS6_unknown	mphE	IS15_IS6_unknown-mphE	1929	0	1	1	0
SDPD4JFT2-17	Broiler faeces	Chicken	Farm	Shandong 4	Shandong	k119_882349	SDPD4JFT2-17_l500.fa-k119_882349	IS15_IS6_unknown	mphE	IS15_IS6_unknown-mphE	1929	0	1	1	0
SDPD4JFT1-17	Broiler faeces	Chicken	Farm	Shandong 4	Shandong	k119_22164	SDPD4JFT1-17_l500.fa-k119_22164	IS15_IS6_unknown	mphE	IS15_IS6_unknown-mphE	1929	0	1	1	0
SDPD4JFT2-11	Broiler faeces	Chicken	Farm	Shandong 4	Shandong	k119_77988	SDPD4JFT2-11_l500.fa-k119_77988	IS15_IS6_unknown	mphE	IS15_IS6_unknown-mphE	1929	0	1	1	0
SDPD4YMT2-03	Broiler Feather	Chicken	Farm	Shandong 4	Shandong	k119_695588	SDPD4YMT2-03_l500.fa-k119_695588	IS15_IS6_unknown	mphE	IS15_IS6_unknown-mphE	1892	0	1	1	0
SDPD4TRT1-01	Soil	Environment	Farm	Shandong 4	Shandong	k119_149869	SDPD4TRT1-01_l500.fa-k119_149869	IS15_IS6_unknown	mphE	IS15_IS6_unknown-mphE	1929	0	1	1	0
SDPD4TRT2-01	Soil	Environment	Farm	Shandong 4	Shandong	k119_85302	SDPD4TRT2-01_l500.fa-k119_85302	IS15_IS6_unknown	mphE	IS15_IS6_unknown-mphE	1929	0	1	1	0
HAYS1JFT2-1	Broiler faeces	Chicken	Farm	Henan 1	Henan	k119_196721	HAYS1JFT2-1_l500.fa-k119_196721	IS15_IS6_unknown	msrE	IS15_IS6_unknown-msrE	2658	0	1	1	0
HAYS1JFT2-4	Broiler faeces	Chicken	Farm	Henan 1	Henan	k119_72647	HAYS1JFT2-4_l500.fa-k119_72647	IS15_IS6_unknown	msrE	IS15_IS6_unknown-msrE	2658	0	1	1	0
HAYS1JFT1-5	Broiler faeces	Chicken	Farm	Henan 1	Henan	k119_354598	HAYS1JFT1-5_l500.fa-k119_354598	IS15_IS6_unknown	msrE	IS15_IS6_unknown-msrE	2658	0	1	1	0
HAYS1JFT1-1	Broiler faeces	Chicken	Farm	Henan 1	Henan	k119_55179	HAYS1JFT1-1_l500.fa-k119_55179	IS15_IS6_unknown	msrE	IS15_IS6_unknown-msrE	2658	0	1	1	0
HAYS1JFT2-8	Broiler faeces	Chicken	Farm	Henan 1	Henan	k119_153578	HAYS1JFT2-8_l500.fa-k119_153578	IS15_IS6_unknown	msrE	IS15_IS6_unknown-msrE	4257	0	1	1	0
HAYS2YMT1-1	Broiler Feather	Chicken	Farm	Henan 2	Henan	k119_664850	HAYS2YMT1-1_l500.fa-k119_664850	IS15_IS6_unknown	msrE	IS15_IS6_unknown-msrE	398	0	1	1	0
HAYS2YMT1-5	Broiler Feather	Chicken	Farm	Henan 2	Henan	k119_118270	HAYS2YMT1-5_l500.fa-k119_118270	IS15_IS6_unknown	msrE	IS15_IS6_unknown-msrE	2658	0	1	1	0
HAYS3JTT3-11	Broiler carcass	Chicken	Slaughterhouse	Henan 3	Henan	k119_34758	HAYS3JTT3-11_l500.fa-k119_34758	IS15_IS6_unknown	msrE	IS15_IS6_unknown-msrE	398	0	1	1	0
HAYS3JFT2-11	Broiler faeces	Chicken	Farm	Henan 3	Henan	k119_43867	HAYS3JFT2-11_l500.fa-k119_43867	IS15_IS6_unknown	msrE	IS15_IS6_unknown-msrE	2658	0	1	1	0
HAYS3JFT1-8	Broiler faeces	Chicken	Farm	Henan 3	Henan	k119_1813708	HAYS3JFT1-8_l500.fa-k119_1813708	IS15_IS6_unknown	msrE	IS15_IS6_unknown-msrE	2658	0	1	1	0
HAYS3YMT2-3	Broiler Feather	Chicken	Farm	Henan 3	Henan	k119_926466	HAYS3YMT2-3_l500.fa-k119_926466	IS15_IS6_unknown	msrE	IS15_IS6_unknown-msrE	2658	0	1	1	0
HAYS3YMT2-4	Broiler Feather	Chicken	Farm	Henan 3	Henan	k119_1056809	HAYS3YMT2-4_l500.fa-k119_1056809	IS15_IS6_unknown	msrE	IS15_IS6_unknown-msrE	2658	0	1	1	0
LNPCJFT1_08	Broiler faeces	Chicken	Farm	Liaoning 1	Liaoning	k119_278415	LNPCJFT1_08_l500.fa-k119_278415	IS15_IS6_unknown	msrE	IS15_IS6_unknown-msrE	398	0	1	1	0
LNPCJFT2_07	Broiler faeces	Chicken	Farm	Liaoning 1	Liaoning	k119_292359	LNPCJFT2_07_l500.fa-k119_292359	IS15_IS6_unknown	msrE	IS15_IS6_unknown-msrE	398	0	1	1	0
LNPCJFT1_03	Broiler faeces	Chicken	Farm	Liaoning 1	Liaoning	k119_646389	LNPCJFT1_03_l500.fa-k119_646389	IS15_IS6_unknown	msrE	IS15_IS6_unknown-msrE	398	0	1	1	0
LNPCJFT2_01	Broiler faeces	Chicken	Farm	Liaoning 1	Liaoning	k119_890530	LNPCJFT2_01_l500.fa-k119_890530	IS15_IS6_unknown	msrE	IS15_IS6_unknown-msrE	398	0	1	1	0
LNPCJFT2_05	Broiler faeces	Chicken	Farm	Liaoning 1	Liaoning	k119_93949	LNPCJFT2_05_l500.fa-k119_93949	IS15_IS6_unknown	msrE	IS15_IS6_unknown-msrE	2634	0	1	1	0
LNPCJFT2_18	Broiler faeces	Chicken	Farm	Liaoning 1	Liaoning	k119_128752	LNPCJFT2_18_l500.fa-k119_128752	IS15_IS6_unknown	msrE	IS15_IS6_unknown-msrE	2634	0	1	1	0
LNPCJFT2_03	Broiler faeces	Chicken	Farm	Liaoning 1	Liaoning	k119_186084	LNPCJFT2_03_l500.fa-k119_186084	IS15_IS6_unknown	msrE	IS15_IS6_unknown-msrE	2658	0	1	1	0
LNPCJFT2_11	Broiler faeces	Chicken	Farm	Liaoning 1	Liaoning	k119_344689	LNPCJFT2_11_l500.fa-k119_344689	IS15_IS6_unknown	msrE	IS15_IS6_unknown-msrE	2658	0	1	1	0
LNPCJFT2_17	Broiler faeces	Chicken	Farm	Liaoning 1	Liaoning	k119_10022	LNPCJFT2_17_l500.fa-k119_10022	IS15_IS6_unknown	msrE	IS15_IS6_unknown-msrE	2658	0	1	1	0
LNPCJFT2_19	Broiler faeces	Chicken	Farm	Liaoning 1	Liaoning	k119_187606	LNPCJFT2_19_l500.fa-k119_187606	IS15_IS6_unknown	msrE	IS15_IS6_unknown-msrE	2658	0	1	1	0
LNTPDMT2_03	Barn Floor	Environment	Farm	Liaoning 2	Liaoning	k119_277798	LNTPDMT2_03_l500.fa-k119_277798	IS15_IS6_unknown	msrE	IS15_IS6_unknown-msrE	398	0	1	1	0
LNLDDMT2-02	Barn Floor	Environment	Farm	Liaoning 3	Liaoning	k119_29081	LNLDDMT2-02_l500.fa-k119_29081	IS15_IS6_unknown	msrE	IS15_IS6_unknown-msrE	398	0	1	1	0
LNLHJTT3-13	Broiler carcass	Chicken	Slaughterhouse	Liaoning 3	Liaoning	k119_115662	LNLHJTT3-13_l500.fa-k119_115662	IS15_IS6_unknown	msrE	IS15_IS6_unknown-msrE	398	0	1	1	0
LNLDJFT2-12	Broiler faeces	Chicken	Farm	Liaoning 3	Liaoning	k119_472547	LNLDJFT2-12_l500.fa-k119_472547	IS15_IS6_unknown	msrE	IS15_IS6_unknown-msrE	398	0	1	1	0
PDJFT1S4L0515	Broiler faeces	Chicken	Farm	Shandong 1_1	Shandong	k119_41972	PDJFT1S4L0515_l500.fa-k119_41972	IS15_IS6_unknown	msrE	IS15_IS6_unknown-msrE	2658	0	1	1	0
PDTRT2S404	Soil	Environment	Farm	Shandong 1_1	Shandong	k119_1007647	PDTRT2S404_l500.fa-k119_1007647	IS15_IS6_unknown	msrE	IS15_IS6_unknown-msrE	398	0	1	1	0
PDJFL1C3	Broiler faeces	Chicken	Farm	Shandong 1_2	Shandong	k119_72298	PDJFL1C3_l500.fa-k119_72298	IS15_IS6_unknown	msrE	IS15_IS6_unknown-msrE	2439	0	1	1	0
SDPD1JTT3.14	Broiler carcass	Chicken	Slaughterhouse	Shandong 2	Shandong	k119_302666	SDPD1JTT3.14_l500.fa-k119_302666	IS15_IS6_unknown	msrE	IS15_IS6_unknown-msrE	2658	0	1	1	0
SDPD1JFT1.09	Broiler faeces	Chicken	Farm	Shandong 2	Shandong	k119_107743	SDPD1JFT1.09_l500.fa-k119_107743	IS15_IS6_unknown	msrE	IS15_IS6_unknown-msrE	398	0	1	1	0
SDPD1JFT1.10	Broiler faeces	Chicken	Farm	Shandong 2	Shandong	k119_20831	SDPD1JFT1.10_l500.fa-k119_20831	IS15_IS6_unknown	msrE	IS15_IS6_unknown-msrE	2658	0	1	1	0
SDPD1YMT1.04	Broiler Feather	Chicken	Farm	Shandong 2	Shandong	k119_557590	SDPD1YMT1.04_l500.fa-k119_557590	IS15_IS6_unknown	msrE	IS15_IS6_unknown-msrE	1414	0	1	1	0
SDPD1YMT2.04	Broiler Feather	Chicken	Farm	Shandong 2	Shandong	k119_438629	SDPD1YMT2.04_l500.fa-k119_438629	IS15_IS6_unknown	msrE	IS15_IS6_unknown-msrE	2658	0	1	1	0
SDPD3JFT1-13	Broiler faeces	Chicken	Farm	Shandong 3	Shandong	k119_212355	SDPD3JFT1-13_l500.fa-k119_212355	IS15_IS6_unknown	msrE	IS15_IS6_unknown-msrE	2658	0	1	1	0
SDPD4JFT2-11	Broiler faeces	Chicken	Farm	Shandong 4	Shandong	k119_77988	SDPD4JFT2-11_l500.fa-k119_77988	IS15_IS6_unknown	msrE	IS15_IS6_unknown-msrE	398	0	1	1	0
SDPD4JFT2-01	Broiler faeces	Chicken	Farm	Shandong 4	Shandong	k119_541524	SDPD4JFT2-01_l500.fa-k119_541524	IS15_IS6_unknown	msrE	IS15_IS6_unknown-msrE	398	0	1	1	0
SDPD4JFT2-09	Broiler faeces	Chicken	Farm	Shandong 4	Shandong	k119_542220	SDPD4JFT2-09_l500.fa-k119_542220	IS15_IS6_unknown	msrE	IS15_IS6_unknown-msrE	398	0	1	1	0
SDPD4JFT2-17	Broiler faeces	Chicken	Farm	Shandong 4	Shandong	k119_882349	SDPD4JFT2-17_l500.fa-k119_882349	IS15_IS6_unknown	msrE	IS15_IS6_unknown-msrE	398	0	1	1	0
SDPD4JFT1-17	Broiler faeces	Chicken	Farm	Shandong 4	Shandong	k119_22164	SDPD4JFT1-17_l500.fa-k119_22164	IS15_IS6_unknown	msrE	IS15_IS6_unknown-msrE	398	0	1	1	0
SDPD4JFT2-07	Broiler faeces	Chicken	Farm	Shandong 4	Shandong	k119_428954	SDPD4JFT2-07_l500.fa-k119_428954	IS15_IS6_unknown	msrE	IS15_IS6_unknown-msrE	2095	0	1	1	0
SDPD4YMT2-03	Broiler Feather	Chicken	Farm	Shandong 4	Shandong	k119_695588	SDPD4YMT2-03_l500.fa-k119_695588	IS15_IS6_unknown	msrE	IS15_IS6_unknown-msrE	361	0	1	1	0
SDPD4TRT1-01	Soil	Environment	Farm	Shandong 4	Shandong	k119_149869	SDPD4TRT1-01_l500.fa-k119_149869	IS15_IS6_unknown	msrE	IS15_IS6_unknown-msrE	398	0	1	1	0
SDPD4TRT2-01	Soil	Environment	Farm	Shandong 4	Shandong	k119_85302	SDPD4TRT2-01_l500.fa-k119_85302	IS15_IS6_unknown	msrE	IS15_IS6_unknown-msrE	398	0	1	1	0
HAYS1JTT3-6	Broiler carcass	Chicken	Slaughterhouse	Henan 1	Henan	k119_16318	HAYS1JTT3-6_l500.fa-k119_16318	IS15_IS6_unknown	oqxA	IS15_IS6_unknown-oqxA	257	0	1	1	0
HAYS1JFT2-1	Broiler faeces	Chicken	Farm	Henan 1	Henan	k119_191728	HAYS1JFT2-1_l500.fa-k119_191728	IS15_IS6_unknown	oqxA	IS15_IS6_unknown-oqxA	257	0	1	1	0
HAYS1JFT2-3	Broiler faeces	Chicken	Farm	Henan 1	Henan	k119_311486	HAYS1JFT2-3_l500.fa-k119_311486	IS15_IS6_unknown	oqxA	IS15_IS6_unknown-oqxA	257	0	1	1	0
HAYS1JFT2-5	Broiler faeces	Chicken	Farm	Henan 1	Henan	k119_153950	HAYS1JFT2-5_l500.fa-k119_153950	IS15_IS6_unknown	oqxA	IS15_IS6_unknown-oqxA	257	0	1	1	0
HAYS1JFT2-7	Broiler faeces	Chicken	Farm	Henan 1	Henan	k119_435951	HAYS1JFT2-7_l500.fa-k119_435951	IS15_IS6_unknown	oqxA	IS15_IS6_unknown-oqxA	257	0	1	1	0
HAYS1JFT1-8	Broiler faeces	Chicken	Farm	Henan 1	Henan	k119_454794	HAYS1JFT1-8_l500.fa-k119_454794	IS15_IS6_unknown	oqxA	IS15_IS6_unknown-oqxA	257	0	1	1	0
HAYS1JFT1-1	Broiler faeces	Chicken	Farm	Henan 1	Henan	k119_29868	HAYS1JFT1-1_l500.fa-k119_29868	IS15_IS6_unknown	oqxA	IS15_IS6_unknown-oqxA	257	0	1	1	0
HAYS1JFT2-6	Broiler faeces	Chicken	Farm	Henan 1	Henan	k119_205586	HAYS1JFT2-6_l500.fa-k119_205586	IS15_IS6_unknown	oqxA	IS15_IS6_unknown-oqxA	257	0	1	1	0
HAYS1JFT2-2	Broiler faeces	Chicken	Farm	Henan 1	Henan	k119_10139	HAYS1JFT2-2_l500.fa-k119_10139	IS15_IS6_unknown	oqxA	IS15_IS6_unknown-oqxA	3775	0	1	1	0
HAYS2JFT1-11	Broiler faeces	Chicken	Farm	Henan 2	Henan	k119_364037	HAYS2JFT1-11_l500.fa-k119_364037	IS15_IS6_unknown	oqxA	IS15_IS6_unknown-oqxA	257	0	1	1	0
HAYS2JFT1-14	Broiler faeces	Chicken	Farm	Henan 2	Henan	k119_93330	HAYS2JFT1-14_l500.fa-k119_93330	IS15_IS6_unknown	oqxA	IS15_IS6_unknown-oqxA	257	0	1	1	0
HAYS2JFT1-13	Broiler faeces	Chicken	Farm	Henan 2	Henan	k119_157481	HAYS2JFT1-13_l500.fa-k119_157481	IS15_IS6_unknown	oqxA	IS15_IS6_unknown-oqxA	3775	0	1	1	0
HAYS2JFT1-8	Broiler faeces	Chicken	Farm	Henan 2	Henan	k119_104139	HAYS2JFT1-8_l500.fa-k119_104139	IS15_IS6_unknown	oqxA	IS15_IS6_unknown-oqxA	3775	0	1	1	0
HAYS2JFT2-11	Broiler faeces	Chicken	Farm	Henan 2	Henan	k119_8602	HAYS2JFT2-11_l500.fa-k119_8602	IS15_IS6_unknown	oqxA	IS15_IS6_unknown-oqxA	3783	0	1	1	0
HAYS2YMT2-4	Broiler Feather	Chicken	Farm	Henan 2	Henan	k119_681411	HAYS2YMT2-4_l500.fa-k119_681411	IS15_IS6_unknown	oqxA	IS15_IS6_unknown-oqxA	256	0	1	1	0
HAYS2YMT1-3	Broiler Feather	Chicken	Farm	Henan 2	Henan	k119_567879	HAYS2YMT1-3_l500.fa-k119_567879	IS15_IS6_unknown	oqxA	IS15_IS6_unknown-oqxA	257	0	1	1	0
HAYS2YMT1-1	Broiler Feather	Chicken	Farm	Henan 2	Henan	k119_528121	HAYS2YMT1-1_l500.fa-k119_528121	IS15_IS6_unknown	oqxA	IS15_IS6_unknown-oqxA	257	0	1	1	0
HAYS2YMT1-4	Broiler Feather	Chicken	Farm	Henan 2	Henan	k119_312244	HAYS2YMT1-4_l500.fa-k119_312244	IS15_IS6_unknown	oqxA	IS15_IS6_unknown-oqxA	257	0	1	1	0
HAYS2YMT1-5	Broiler Feather	Chicken	Farm	Henan 2	Henan	k119_831305	HAYS2YMT1-5_l500.fa-k119_831305	IS15_IS6_unknown	oqxA	IS15_IS6_unknown-oqxA	257	0	1	1	0
[truncated: 9,290 more rows]

## Sheet: Summary
MobileARG	MGE	ARG	Number of samples
IS10L_IS4_IS10-AAC(3)-IIe	IS10L_IS4_IS10	AAC(3)-IIe	4
IS15_IS6_unknown-AAC(3)-IIe	IS15_IS6_unknown	AAC(3)-IIe	15
IS15_IS6_unknown-dfrA1	IS15_IS6_unknown	dfrA1	5
IS15DII_IS6_unknown-AAC(3)-IIe	IS15DII_IS6_unknown	AAC(3)-IIe	9
ISAlw25_IS1_unknown-dfrA1	ISAlw25_IS1_unknown	dfrA1	3
ISCfr1_IS1182_unknown-AAC(3)-IIe	ISCfr1_IS1182_unknown	AAC(3)-IIe	7
ISKpn12_IS5_IS427-AAC(3)-IIe	ISKpn12_IS5_IS427	AAC(3)-IIe	3
ISKpn26_IS5_IS5-dfrA1	ISKpn26_IS5_IS5	dfrA1	8
ISPa25_IS110_IS1111-catB2	ISPa25_IS110_IS1111	catB2	5
IS102_IS5_IS903-CTX-M-24	IS102_IS5_IS903	CTX-M-24	18
IS102_IS5_IS903-CTX-M-55	IS102_IS5_IS903	CTX-M-55	2
IS1168_IS5_IS5-CfxA3	IS1168_IS5_IS5	CfxA3	3
IS1169_IS5_IS5-CfxA3	IS1169_IS5_IS5	CfxA3	9
IS1187_IS982_unknown-CfxA2	IS1187_IS982_unknown	CfxA2	5
IS1187_IS982_unknown-CfxA3	IS1187_IS982_unknown	CfxA3	19
IS1216_IS6_unknown-catA8	IS1216_IS6_unknown	catA8	10
IS1216_IS6_unknown-ErmC	IS1216_IS6_unknown	ErmC	66
IS1247_IS1380_unknown-aadA5	IS1247_IS1380_unknown	aadA5	2
IS1249_IS256_IS1249-ErmX	IS1249_IS256_IS1249	ErmX	8
IS1294_IS91_unknown-CTX-M-55	IS1294_IS91_unknown	CTX-M-55	2
IS1326_IS21_unknown-aadA5	IS1326_IS21_unknown	aadA5	4
IS1326_IS21_unknown-dfrA17	IS1326_IS21_unknown	dfrA17	4
IS15_IS6_unknown-AAC(6')-Ib-cr	IS15_IS6_unknown	AAC(6')-Ib-cr	37
IS15_IS6_unknown-aadA5	IS15_IS6_unknown	aadA5	14
IS15_IS6_unknown-cmlA1	IS15_IS6_unknown	cmlA1	4
IS15_IS6_unknown-cmlA5	IS15_IS6_unknown	cmlA5	16
IS15_IS6_unknown-CTX-M-55	IS15_IS6_unknown	CTX-M-55	28
IS15_IS6_unknown-CTX-M-9	IS15_IS6_unknown	CTX-M-9	2
IS15_IS6_unknown-dfrA17	IS15_IS6_unknown	dfrA17	26
IS15_IS6_unknown-DHA-1	IS15_IS6_unknown	DHA-1	13
IS15_IS6_unknown-linG	IS15_IS6_unknown	linG	125
IS15_IS6_unknown-mphF	IS15_IS6_unknown	mphF	12
IS15_IS6_unknown-NDM-1	IS15_IS6_unknown	NDM-1	5
IS15_IS6_unknown-NDM-5	IS15_IS6_unknown	NDM-5	14
IS15_IS6_unknown-OXA-1	IS15_IS6_unknown	OXA-1	35
IS15_IS6_unknown-QnrA1	IS15_IS6_unknown	QnrA1	7
IS15_IS6_unknown-QnrS2	IS15_IS6_unknown	QnrS2	17
IS1592_IS982_unknown-tet(H)	IS1592_IS982_unknown	tet(H)	12
IS15DI_IS6_unknown-cmlA5	IS15DI_IS6_unknown	cmlA5	3
IS15DII_IS6_unknown-QnrS2	IS15DII_IS6_unknown	QnrS2	2
IS15DIV_IS6_unknown-CTX-M-55	IS15DIV_IS6_unknown	CTX-M-55	2
IS1628_IS6_unknown-ErmX	IS1628_IS6_unknown	ErmX	2
IS1A_IS1_unknown-aadA5	IS1A_IS1_unknown	aadA5	3
IS1A_IS1_unknown-dfrA17	IS1A_IS1_unknown	dfrA17	2
IS1A_IS1_unknown-Escherichia_coli_mdfA	IS1A_IS1_unknown	Escherichia_coli_mdfA	2
IS1A_IS1_unknown-linG	IS1A_IS1_unknown	linG	4
IS1A_IS1_unknown-QnrB4	IS1A_IS1_unknown	QnrB4	8
IS256_IS256_unknown-ANT(9)-Ia	IS256_IS256_unknown	ANT(9)-Ia	11
IS256_IS256_unknown-FosD	IS256_IS256_unknown	FosD	5
IS256_IS256_unknown-PC1_beta-lactamase_(blaZ)	IS256_IS256_unknown	PC1_beta-lactamase_(blaZ)	2
IS257-1_IS6_unknown-ErmC	IS257-1_IS6_unknown	ErmC	4
IS257-1_IS6_unknown-mecA	IS257-1_IS6_unknown	mecA	6
IS257-1_IS6_unknown-mecR1	IS257-1_IS6_unknown	mecR1	6
IS257-1_IS6_unknown-PC1_beta-lactamase_(blaZ)	IS257-1_IS6_unknown	PC1_beta-lactamase_(blaZ)	2
IS3503_IS256_IS1249-ErmX	IS3503_IS256_IS1249	ErmX	2
IS3507_IS256_IS1249-ErmX	IS3507_IS256_IS1249	ErmX	2
IS4321_IS110_IS1111-aadA5	IS4321_IS110_IS1111	aadA5	4
IS4321_IS110_IS1111-dfrA17	IS4321_IS110_IS1111	dfrA17	4
IS5_IS5_IS5-NDM-5	IS5_IS5_IS5	NDM-5	11
IS6100_IS6_unknown-AAC(6')-Ib9	IS6100_IS6_unknown	AAC(6')-Ib9	2
IS6100_IS6_unknown-aadA5	IS6100_IS6_unknown	aadA5	12
IS6100_IS6_unknown-dfrA16	IS6100_IS6_unknown	dfrA16	4
IS6100_IS6_unknown-dfrA17	IS6100_IS6_unknown	dfrA17	10
IS6100_IS6_unknown-tet(33)	IS6100_IS6_unknown	tet(33)	2
IS615_IS1380_IS942-CfxA2	IS615_IS1380_IS942	CfxA2	4
IS615_IS1380_IS942-CfxA3	IS615_IS1380_IS942	CfxA3	6
IS942_IS1380_IS942-CfxA2	IS942_IS1380_IS942	CfxA2	3
IS942_IS1380_IS942-CfxA3	IS942_IS1380_IS942	CfxA3	5
ISAba125_IS30_unknown-NDM-1	ISAba125_IS30_unknown	NDM-1	19
ISAba125_IS30_unknown-NDM-5	ISAba125_IS30_unknown	NDM-5	16
ISAba3_IS1_unknown-PER-1	ISAba3_IS1_unknown	PER-1	2
ISAba3_IS1_unknown-tet(H)	ISAba3_IS1_unknown	tet(H)	10
ISAlw25_IS1_unknown-tet(H)	ISAlw25_IS1_unknown	tet(H)	21
ISAlw3_IS1_unknown-tet(H)	ISAlw3_IS1_unknown	tet(H)	2
ISApl1_IS30_unknown-AAC(6')-Ib-cr	ISApl1_IS30_unknown	AAC(6')-Ib-cr	3
ISBbi1_IS1595_unknown-CfxA2	ISBbi1_IS1595_unknown	CfxA2	27
ISBdi7_IS21_unknown-aadA5	ISBdi7_IS21_unknown	aadA5	2
ISBdi7_IS21_unknown-dfrA17	ISBdi7_IS21_unknown	dfrA17	2
ISBf8_IS4_ISPepr1-CfxA3	ISBf8_IS4_ISPepr1	CfxA3	6
ISBf9_ISAs1_unknown-CfxA3	ISBf9_ISAs1_unknown	CfxA3	3
ISC1041_IS30_unknown-NDM-1	ISC1041_IS30_unknown	NDM-1	11
ISCur2_IS256_IS1249-ErmX	ISCur2_IS256_IS1249	ErmX	2
ISCx1_ISL3_unknown-ErmX	ISCx1_ISL3_unknown	ErmX	13
ISEc58_IS256_unknown-AAC(3)-VIa	ISEc58_IS256_unknown	AAC(3)-VIa	9
ISEc9_IS1380_unknown-cfrC	ISEc9_IS1380_unknown	cfrC	4
ISEc9_IS1380_unknown-CTX-M-15	ISEc9_IS1380_unknown	CTX-M-15	11
ISEc9_IS1380_unknown-CTX-M-24	ISEc9_IS1380_unknown	CTX-M-24	20
ISEc9_IS1380_unknown-CTX-M-55	ISEc9_IS1380_unknown	CTX-M-55	161
ISEnca1_IS1380_unknown-APH(2'')-Ie	ISEnca1_IS1380_unknown	APH(2'')-Ie	10
ISKpn26_IS5_IS5-SAT-1	ISKpn26_IS5_IS5	SAT-1	8
ISLac1_IS1182_unknown-ErmC	ISLac1_IS1182_unknown	ErmC	2
ISLgar4_IS6_unknown-ErmC	ISLgar4_IS6_unknown	ErmC	3
ISLmo9_IS3_IS150-ANT(9)-Ia	ISLmo9_IS3_IS150	ANT(9)-Ia	5
ISPa12_IS4_ISH8-PER-1	ISPa12_IS4_ISH8	PER-1	4
ISPa13_IS4_ISH8-PER-1	ISPa13_IS4_ISH8	PER-1	3
ISPa25_IS110_IS1111-cmlA6	ISPa25_IS110_IS1111	cmlA6	2
ISPye15_IS701_unknown-mphF	ISPye15_IS701_unknown	mphF	2
ISSau9_IS21_unknown-lsaB	ISSau9_IS21_unknown	lsaB	3
ISVsa3_IS91_unknown-APH(3')-Ib	ISVsa3_IS91_unknown	APH(3')-Ib	6
ISVsa3_IS91_unknown-CfxA2	ISVsa3_IS91_unknown	CfxA2	27
IS102_IS5_IS903-APH(4)-Ia	IS102_IS5_IS903	APH(4)-Ia	31
IS102_IS5_IS903-CTX-M-104	IS102_IS5_IS903	CTX-M-104	2
IS102_IS5_IS903-CTX-M-14	IS102_IS5_IS903	CTX-M-14	45
IS102_IS5_IS903-CTX-M-27	IS102_IS5_IS903	CTX-M-27	18
IS102_IS5_IS903-CTX-M-65	IS102_IS5_IS903	CTX-M-65	75
IS102_IS5_IS903-MCR-8	IS102_IS5_IS903	MCR-8	5
IS103_IS3_IS150-mdtC	IS103_IS3_IS150	mdtC	2
IS10L_IS4_IS10-tet(B)	IS10L_IS4_IS10	tet(B)	56
IS10R_IS4_IS10-tet(B)	IS10R_IS4_IS10	tet(B)	6
IS1133_IS3_IS3-CTX-M-65	IS1133_IS3_IS3	CTX-M-65	2
IS1168_IS5_IS5-Mef(En2)	IS1168_IS5_IS5	Mef(En2)	3
IS1169_IS5_IS5-CcrA_beta-lactamase	IS1169_IS5_IS5	CcrA_beta-lactamase	2
IS1188_IS1380_unknown-CcrA_beta-lactamase	IS1188_IS1380_unknown	CcrA_beta-lactamase	2
IS1194_IS5_IS5-FosB3	IS1194_IS5_IS5	FosB3	5
IS1216_IS6_unknown-APH(2'')-IIIa	IS1216_IS6_unknown	APH(2'')-IIIa	2
IS1216_IS6_unknown-cfrA	IS1216_IS6_unknown	cfrA	3
IS1216_IS6_unknown-emtA	IS1216_IS6_unknown	emtA	3
IS1216_IS6_unknown-FosB3	IS1216_IS6_unknown	FosB3	3
IS1216_IS6_unknown-optrA	IS1216_IS6_unknown	optrA	29
IS1216_IS6_unknown-tetS	IS1216_IS6_unknown	tetS	42
IS1216E_IS6_unknown-tetS	IS1216E_IS6_unknown	tetS	2
IS1230B_IS3_IS3-oqxA	IS1230B_IS3_IS3	oqxA	2
IS1230B_IS3_IS3-oqxB	IS1230B_IS3_IS3	oqxB	2
IS1247_IS1380_unknown-AAC(6')-IIc	IS1247_IS1380_unknown	AAC(6')-IIc	2
IS1247_IS1380_unknown-tet(G)	IS1247_IS1380_unknown	tet(G)	2
IS1294_IS91_unknown-CTX-M-64	IS1294_IS91_unknown	CTX-M-64	3
IS1294_IS91_unknown-oqxA	IS1294_IS91_unknown	oqxA	2
IS1294_IS91_unknown-rmtB	IS1294_IS91_unknown	rmtB	3
IS1326_IS21_unknown-sul1	IS1326_IS21_unknown	sul1	9
IS1396_ISL3_unknown-cmx	IS1396_ISL3_unknown	cmx	3
IS1396_ISL3_unknown-dfrA27	IS1396_ISL3_unknown	dfrA27	2
IS1396_ISL3_unknown-lnuG	IS1396_ISL3_unknown	lnuG	25
IS15_IS6_unknown-aadA22	IS15_IS6_unknown	aadA22	2
IS15_IS6_unknown-APH(3')-VI	IS15_IS6_unknown	APH(3')-VI	4
IS15_IS6_unknown-APH(4)-Ia	IS15_IS6_unknown	APH(4)-Ia	204
IS15_IS6_unknown-arr-2	IS15_IS6_unknown	arr-2	25
IS15_IS6_unknown-arr-3	IS15_IS6_unknown	arr-3	19
IS15_IS6_unknown-CARB-3	IS15_IS6_unknown	CARB-3	2
IS15_IS6_unknown-catI	IS15_IS6_unknown	catI	8
IS15_IS6_unknown-catII_from_Escherichia_coli_K-12	IS15_IS6_unknown	catII_from_Escherichia_coli_K-12	22
IS15_IS6_unknown-CTX-M-14	IS15_IS6_unknown	CTX-M-14	9
IS15_IS6_unknown-CTX-M-65	IS15_IS6_unknown	CTX-M-65	9
IS15_IS6_unknown-determinant_of_bleomycin_resistance	IS15_IS6_unknown	determinant_of_bleomycin_resistance	20
IS15_IS6_unknown-dfrA27	IS15_IS6_unknown	dfrA27	6
IS15_IS6_unknown-Erm(42)	IS15_IS6_unknown	Erm(42)	36
IS15_IS6_unknown-LAP-2	IS15_IS6_unknown	LAP-2	2
IS15_IS6_unknown-mphE	IS15_IS6_unknown	mphE	43
IS15_IS6_unknown-msrE	IS15_IS6_unknown	msrE	44
IS15_IS6_unknown-oqxA	IS15_IS6_unknown	oqxA	118
IS15_IS6_unknown-oqxB	IS15_IS6_unknown	oqxB	110
IS15_IS6_unknown-rmtB	IS15_IS6_unknown	rmtB	17
IS15_IS6_unknown-sul1	IS15_IS6_unknown	sul1	15
IS15_IS6_unknown-sul3	IS15_IS6_unknown	sul3	139
IS15_IS6_unknown-tet(39)	IS15_IS6_unknown	tet(39)	2
IS15_IS6_unknown-tet(C)	IS15_IS6_unknown	tet(C)	31
IS15_IS6_unknown-tet(D)	IS15_IS6_unknown	tet(D)	27
IS1542_IS256_unknown-catQ	IS1542_IS256_unknown	catQ	3
IS1542_IS256_unknown-lnuG	IS1542_IS256_unknown	lnuG	6
IS15DI_IS6_unknown-arr-2	IS15DI_IS6_unknown	arr-2	3
IS15DI_IS6_unknown-tet(D)	IS15DI_IS6_unknown	tet(D)	4
IS15DII_IS6_unknown-catII_from_Escherichia_coli_K-12	IS15DII_IS6_unknown	catII_from_Escherichia_coli_K-12	2
IS15DII_IS6_unknown-CTX-M-14	IS15DII_IS6_unknown	CTX-M-14	2
IS15DII_IS6_unknown-oqxA	IS15DII_IS6_unknown	oqxA	5
IS15DII_IS6_unknown-oqxB	IS15DII_IS6_unknown	oqxB	5
IS15DII_IS6_unknown-tet(D)	IS15DII_IS6_unknown	tet(D)	8
IS15DIV_IS6_unknown-msrE	IS15DIV_IS6_unknown	msrE	2
IS1628_IS6_unknown-APH(3')-VI	IS1628_IS6_unknown	APH(3')-VI	2
IS1628_IS6_unknown-APH(3')-VIa	IS1628_IS6_unknown	APH(3')-VIa	4
IS1628_IS6_unknown-tet(Z)	IS1628_IS6_unknown	tet(Z)	4
IS1A_IS1_unknown-arr-3	IS1A_IS1_unknown	arr-3	3
IS1A_IS1_unknown-catI	IS1A_IS1_unknown	catI	43
IS1A_IS1_unknown-CTX-M-123	IS1A_IS1_unknown	CTX-M-123	2
IS1A_IS1_unknown-CTX-M-65	IS1A_IS1_unknown	CTX-M-65	2
IS1A_IS1_unknown-lnuG	IS1A_IS1_unknown	lnuG	8
IS1A_IS1_unknown-sul3	IS1A_IS1_unknown	sul3	3
IS1B_IS1_unknown-catI	IS1B_IS1_unknown	catI	2
IS1F_IS1_unknown-mdtG	IS1F_IS1_unknown	mdtG	7
IS2_IS3_IS2-mphE	IS2_IS3_IS2	mphE	2
IS2_IS3_IS2-msrE	IS2_IS3_IS2	msrE	2
IS256_IS256_unknown-cfrA	IS256_IS256_unknown	cfrA	3
IS30_IS30_unknown-acrB	IS30_IS30_unknown	acrB	3
IS4321_IS110_IS1111-catI	IS4321_IS110_IS1111	catI	8
IS4321_IS110_IS1111-sul1	IS4321_IS110_IS1111	sul1	4
IS4351_IS30_unknown-MUS-1_beta-lactamase	IS4351_IS30_unknown	MUS-1_beta-lactamase	5
IS4351_IS30_unknown-tetX	IS4351_IS30_unknown	tetX	2
IS5_IS5_IS5-CTX-M-14	IS5_IS5_IS5	CTX-M-14	2
IS5_IS5_IS5-determinant_of_bleomycin_resistance	IS5_IS5_IS5	determinant_of_bleomycin_resistance	12
IS5_IS5_IS5-mphE	IS5_IS5_IS5	mphE	24
IS5_IS5_IS5-msrE	IS5_IS5_IS5	msrE	25
IS5564_IS481_unknown-APH(4)-Ia	IS5564_IS481_unknown	APH(4)-Ia	2
IS5564_IS481_unknown-sul1	IS5564_IS481_unknown	sul1	4
IS5564_IS481_unknown-tet(Z)	IS5564_IS481_unknown	tet(Z)	7
IS6100_IS6_unknown-AAC(6')-IIa	IS6100_IS6_unknown	AAC(6')-IIa	2
IS6100_IS6_unknown-cmx	IS6100_IS6_unknown	cmx	4
IS6100_IS6_unknown-sul1	IS6100_IS6_unknown	sul1	33
IS6100_IS6_unknown-tet(C)	IS6100_IS6_unknown	tet(C)	15
IS6100_IS6_unknown-tet(G)	IS6100_IS6_unknown	tet(G)	5
IS6100_IS6_unknown-tet(Z)	IS6100_IS6_unknown	tet(Z)	6
IS612_IS1380_IS942-CcrA_beta-lactamase	IS612_IS1380_IS942	CcrA_beta-lactamase	10
IS612B_IS1380_IS942-CcrA_beta-lactamase	IS612B_IS1380_IS942	CcrA_beta-lactamase	15
IS612B_IS1380_IS942-cepA_beta-lactamase	IS612B_IS1380_IS942	cepA_beta-lactamase	3
IS612B_IS1380_IS942-OXA-347	IS612B_IS1380_IS942	OXA-347	4
IS613_IS1380_IS942-CcrA_beta-lactamase	IS613_IS1380_IS942	CcrA_beta-lactamase	8
IS613_IS1380_IS942-EreD	IS613_IS1380_IS942	EreD	10
IS613_IS1380_IS942-OXA-347	IS613_IS1380_IS942	OXA-347	14
IS613_IS1380_IS942-tetX	IS613_IS1380_IS942	tetX	6
IS614_IS1380_IS942-EreD	IS614_IS1380_IS942	EreD	5
IS614_IS1380_IS942-OXA-347	IS614_IS1380_IS942	OXA-347	3
IS614_IS1380_IS942-tetX	IS614_IS1380_IS942	tetX	2
IS621_IS110_unknown-mdtG	IS621_IS110_unknown	mdtG	144
IS903_IS5_IS903-CTX-M-14	IS903_IS5_IS903	CTX-M-14	3
IS903B_IS5_IS903-MCR-8	IS903B_IS5_IS903	MCR-8	2
IS942_IS1380_IS942-EreD	IS942_IS1380_IS942	EreD	4
IS942_IS1380_IS942-OXA-347	IS942_IS1380_IS942	OXA-347	2
ISAba1_IS4_IS10-APH(3')-VI	ISAba1_IS4_IS10	APH(3')-VI	3
ISAba1_IS4_IS10-APH(4)-Ia	ISAba1_IS4_IS10	APH(4)-Ia	14
ISAba1_IS4_IS10-Erm(42)	ISAba1_IS4_IS10	Erm(42)	2
ISAba125_IS30_unknown-APH(3')-VI	ISAba125_IS30_unknown	APH(3')-VI	13
ISAba125_IS30_unknown-APH(3')-VIa	ISAba125_IS30_unknown	APH(3')-VIa	6
ISAba125_IS30_unknown-determinant_of_bleomycin_resistance	ISAba125_IS30_unknown	determinant_of_bleomycin_resistance	36
ISAba14_IS3_IS150-APH(3')-VI	ISAba14_IS3_IS150	APH(3')-VI	5
ISAba14_IS3_IS150-APH(3')-VIa	ISAba14_IS3_IS150	APH(3')-VIa	11
ISAba14_IS3_IS150-tet(39)	ISAba14_IS3_IS150	tet(39)	2
ISAba16_IS66_unknown-CARB-16	ISAba16_IS66_unknown	CARB-16	2
ISAba18_IS3_IS51-cmx	ISAba18_IS3_IS51	cmx	3
ISAba3_IS1_unknown-mphE	ISAba3_IS1_unknown	mphE	11
ISAba3_IS1_unknown-msrE	ISAba3_IS1_unknown	msrE	11
ISAba3_IS1_unknown-OXA-58	ISAba3_IS1_unknown	OXA-58	40
ISAba32_ISNCY_IS1202-mphE	ISAba32_ISNCY_IS1202	mphE	2
ISAba32_ISNCY_IS1202-msrE	ISAba32_ISNCY_IS1202	msrE	2
ISAba32_ISNCY_IS1202-OXA-58	ISAba32_ISNCY_IS1202	OXA-58	3
ISAba32_ISNCY_IS1202-tet(39)	ISAba32_ISNCY_IS1202	tet(39)	12
ISAcsp5_IS3_IS150-APH(3')-VI	ISAcsp5_IS3_IS150	APH(3')-VI	2
ISAcsp5_IS3_IS150-tet(39)	ISAcsp5_IS3_IS150	tet(39)	2
ISAjo2_ISNCY_IS1202-tet(39)	ISAjo2_ISNCY_IS1202	tet(39)	4
ISAlw25_IS1_unknown-lnuF	ISAlw25_IS1_unknown	lnuF	5
ISAlw25_IS1_unknown-OXA-58	ISAlw25_IS1_unknown	OXA-58	6
ISAlw25_IS1_unknown-tet(Y)	ISAlw25_IS1_unknown	tet(Y)	2
ISAlw3_IS1_unknown-mphE	ISAlw3_IS1_unknown	mphE	6
ISAlw3_IS1_unknown-msrE	ISAlw3_IS1_unknown	msrE	5
ISAmas1_IS256_IS1249-cmx	ISAmas1_IS256_IS1249	cmx	16
ISAmas1_IS256_IS1249-tet(Z)	ISAmas1_IS256_IS1249	tet(Z)	6
ISBbi1_IS1595_unknown-EreD	ISBbi1_IS1595_unknown	EreD	4
ISBbi1_IS1595_unknown-mphG	ISBbi1_IS1595_unknown	mphG	2
ISBbi1_IS1595_unknown-OXA-347	ISBbi1_IS1595_unknown	OXA-347	96
ISBbi1_IS1595_unknown-tetX	ISBbi1_IS1595_unknown	tetX	38
ISBdi7_IS21_unknown-sul1	ISBdi7_IS21_unknown	sul1	7
ISBf12_IS1380_IS942-CcrA_beta-lactamase	ISBf12_IS1380_IS942	CcrA_beta-lactamase	2
ISBf12_IS1380_IS942-cepA_beta-lactamase	ISBf12_IS1380_IS942	cepA_beta-lactamase	3
ISBf12_IS1380_IS942-EreD	ISBf12_IS1380_IS942	EreD	4
ISBf12_IS1380_IS942-OXA-347	ISBf12_IS1380_IS942	OXA-347	3
ISBf2_IS21_unknown-cepA_beta-lactamase	ISBf2_IS21_unknown	cepA_beta-lactamase	2
ISBf7_IS1380_IS942-CcrA_beta-lactamase	ISBf7_IS1380_IS942	CcrA_beta-lactamase	2
ISBf7_IS1380_IS942-EreD	ISBf7_IS1380_IS942	EreD	4
ISBf7_IS1380_IS942-OXA-347	ISBf7_IS1380_IS942	OXA-347	2
ISBf9_ISAs1_unknown-CcrA_beta-lactamase	ISBf9_ISAs1_unknown	CcrA_beta-lactamase	6
ISC1041_IS30_unknown-APH(3')-VI	ISC1041_IS30_unknown	APH(3')-VI	9
ISC1041_IS30_unknown-APH(3')-VIa	ISC1041_IS30_unknown	APH(3')-VIa	6
ISC1041_IS30_unknown-determinant_of_bleomycin_resistance	ISC1041_IS30_unknown	determinant_of_bleomycin_resistance	12
ISCba1_IS1595_ISPna2-ErmQ	ISCba1_IS1595_ISPna2	ErmQ	3
ISCba1_IS1595_ISPna2-LnuP	ISCba1_IS1595_ISPna2	LnuP	35
ISCco2_IS1595_ISPna2-APH(3')-VIIa	ISCco2_IS1595_ISPna2	APH(3')-VIIa	7
ISCco2_IS1595_ISPna2-tet(C)	ISCco2_IS1595_ISPna2	tet(C)	4
ISCgl2_IS6_unknown-APH(3')-VIa	ISCgl2_IS6_unknown	APH(3')-VIa	3
ISCgl2_IS6_unknown-cmx	ISCgl2_IS6_unknown	cmx	7
ISCpe8_IS1595_ISPna2-ErmQ	ISCpe8_IS1595_ISPna2	ErmQ	2
ISEc13_IS4_IS50-CTX-M-65	ISEc13_IS4_IS50	CTX-M-65	2
ISEc28_IS5_IS903-mphE	ISEc28_IS5_IS903	mphE	23
ISEc28_IS5_IS903-msrE	ISEc28_IS5_IS903	msrE	24
ISEc29_IS4_IS10-mphE	ISEc29_IS4_IS10	mphE	25
ISEc29_IS4_IS10-msrE	ISEc29_IS4_IS10	msrE	30
ISEc58_IS256_unknown-sul1	ISEc58_IS256_unknown	sul1	5
ISEc59_IS6_unknown-APH(4)-Ia	ISEc59_IS6_unknown	APH(4)-Ia	248
ISEc59_IS6_unknown-APH(4)-Ia	z	APH(4)-Ia	248
ISEc9_IS1380_unknown-CMY-59	ISEc9_IS1380_unknown	CMY-59	20
ISEc9_IS1380_unknown-CTX-M-104	ISEc9_IS1380_unknown	CTX-M-104	2
ISEc9_IS1380_unknown-CTX-M-123	ISEc9_IS1380_unknown	CTX-M-123	7
ISEc9_IS1380_unknown-CTX-M-14	ISEc9_IS1380_unknown	CTX-M-14	46
ISEc9_IS1380_unknown-CTX-M-27	ISEc9_IS1380_unknown	CTX-M-27	17
ISEc9_IS1380_unknown-CTX-M-3	ISEc9_IS1380_unknown	CTX-M-3	5
ISEc9_IS1380_unknown-CTX-M-64	ISEc9_IS1380_unknown	CTX-M-64	8
ISEc9_IS1380_unknown-CTX-M-65	ISEc9_IS1380_unknown	CTX-M-65	77
ISEc9_IS1380_unknown-oqxA	ISEc9_IS1380_unknown	oqxA	2
ISEc9_IS1380_unknown-oqxB	ISEc9_IS1380_unknown	oqxB	2
ISEcl1_IS3_IS2-MCR-8	ISEcl1_IS3_IS2	MCR-8	12
ISEfa4_IS200/IS605_IS605-OXA-85	ISEfa4_IS200/IS605_IS605	OXA-85	2
ISEnfa5_IS3_IS150-cfrA	ISEnfa5_IS3_IS150	cfrA	5
ISKpn19_ISKra4_ISAzba1-LAP-2	ISKpn19_ISKra4_ISAzba1	LAP-2	23
ISKpn26_IS5_IS5-Klebsiella_pneumoniae_OmpK37	ISKpn26_IS5_IS5	Klebsiella_pneumoniae_OmpK37	5
ISKpn26_IS5_IS5-MCR-8	ISKpn26_IS5_IS5	MCR-8	6
ISKpn40_IS3_IS150-MCR-3.11	ISKpn40_IS3_IS150	MCR-3.11	8
ISKrh1_IS481_unknown-cmx	ISKrh1_IS481_unknown	cmx	77
ISKrh1_IS481_unknown-sul1	ISKrh1_IS481_unknown	sul1	3
ISLga1_IS30_unknown-ErmA	ISLga1_IS30_unknown	ErmA	2
ISLxx4_IS481_unknown-cmx	ISLxx4_IS481_unknown	cmx	2
ISMlu5_ISL3_unknown-tet(Z)	ISMlu5_ISL3_unknown	tet(Z)	3
ISMlu7_IS30_unknown-cmx	ISMlu7_IS30_unknown	cmx	3
ISPa12_IS4_ISH8-Erm(42)	ISPa12_IS4_ISH8	Erm(42)	6
ISPa1328_IS256_unknown-APH(3')-VIa	ISPa1328_IS256_unknown	APH(3')-VIa	2
ISPa25_IS110_IS1111-AAC(6')-IIa	ISPa25_IS110_IS1111	AAC(6')-IIa	2
ISPa25_IS110_IS1111-OXA-17	ISPa25_IS110_IS1111	OXA-17	2
ISPpu12_ISL3_unknown-tet(C)	ISPpu12_ISL3_unknown	tet(C)	6
ISPsma1_IS982_unknown-CARB-16	ISPsma1_IS982_unknown	CARB-16	6
ISPssp2_IS1_unknown-CARB-14	ISPssp2_IS1_unknown	CARB-14	2
ISPst9_ISL3_unknown-cmx	ISPst9_ISL3_unknown	cmx	2
ISSau9_IS21_unknown-cfrA	ISSau9_IS21_unknown	cfrA	7
ISSbo1_IS91_unknown-oqxA	ISSbo1_IS91_unknown	oqxA	2
ISShes10_IS30_unknown-Erm(42)	ISShes10_IS30_unknown	Erm(42)	6
ISSsu6_ISL3_unknown-tetS	ISSsu6_ISL3_unknown	tetS	2
ISTeha2_IS6_unknown-optrA	ISTeha2_IS6_unknown	optrA	2
ISVsa3_IS91_unknown-tet(59)	ISVsa3_IS91_unknown	tet(59)	5
ISVsa3_IS91_unknown-Tet(X4)	ISVsa3_IS91_unknown	Tet(X4)	2
IS1006_IS6_unknown-floR	IS1006_IS6_unknown	floR	15
IS1007_IS6_unknown-floR	IS1007_IS6_unknown	floR	4
IS1008_IS6_unknown-floR	IS1008_IS6_unknown	floR	3
IS102_IS5_IS903-APH(3')-Ia	IS102_IS5_IS903	APH(3')-Ia	100
IS102_IS5_IS903-APH(6)-Id	IS102_IS5_IS903	APH(6)-Id	46
IS102_IS5_IS903-TEM-1	IS102_IS5_IS903	TEM-1	5
IS10L_IS4_IS10-AAC(3)-IId	IS10L_IS4_IS10	AAC(3)-IId	92
IS10L_IS4_IS10-floR	IS10L_IS4_IS10	floR	2
IS10R_IS4_IS10-AAC(3)-IId	IS10R_IS4_IS10	AAC(3)-IId	20
IS10R_IS4_IS10-APH(6)-Id	IS10R_IS4_IS10	APH(6)-Id	2
IS1133_IS3_IS3-APH(3')-Ia	IS1133_IS3_IS3	APH(3')-Ia	9
IS1133_IS3_IS3-APH(6)-Id	IS1133_IS3_IS3	APH(6)-Id	57
IS1168_IS5_IS5-APH(3')-IIIa	IS1168_IS5_IS5	APH(3')-IIIa	2
IS1194_IS5_IS5-ErmB	IS1194_IS5_IS5	ErmB	9
IS1203_IS3_IS51-MCR-1	IS1203_IS3_IS51	MCR-1	2
IS1216_IS6_unknown-APH(3')-IIIa	IS1216_IS6_unknown	APH(3')-IIIa	73
IS1216_IS6_unknown-ErmB	IS1216_IS6_unknown	ErmB	8
IS1216_IS6_unknown-ErmT	IS1216_IS6_unknown	ErmT	18
IS1216_IS6_unknown-lnuA	IS1216_IS6_unknown	lnuA	5
IS1216_IS6_unknown-tet(L)	IS1216_IS6_unknown	tet(L)	9
IS1216_IS6_unknown-tetM	IS1216_IS6_unknown	tetM	8
IS1223_IS3_IS150-ErmT	IS1223_IS3_IS150	ErmT	12
IS1223_IS3_IS150-lnuA	IS1223_IS3_IS150	lnuA	2
IS1247_IS1380_unknown-ErmB	IS1247_IS1380_unknown	ErmB	2
IS1294_IS91_unknown-mphA	IS1294_IS91_unknown	mphA	6
IS1294_IS91_unknown-TEM-1	IS1294_IS91_unknown	TEM-1	8
IS1416_IS3_IS51-floR	IS1416_IS3_IS51	floR	2
IS15_IS6_unknown-AAC(3)-IId	IS15_IS6_unknown	AAC(3)-IId	56
IS15_IS6_unknown-AAC(6')-Ib7	IS15_IS6_unknown	AAC(6')-Ib7	2
IS15_IS6_unknown-APH(3')-Ia	IS15_IS6_unknown	APH(3')-Ia	104
IS15_IS6_unknown-APH(6)-Id	IS15_IS6_unknown	APH(6)-Id	19
IS15_IS6_unknown-catB3	IS15_IS6_unknown	catB3	34
IS15_IS6_unknown-dfrA12	IS15_IS6_unknown	dfrA12	4
IS15_IS6_unknown-dfrA14	IS15_IS6_unknown	dfrA14	148
IS15_IS6_unknown-ErmB	IS15_IS6_unknown	ErmB	3
IS15_IS6_unknown-floR	IS15_IS6_unknown	floR	9
IS15_IS6_unknown-MCR-1	IS15_IS6_unknown	MCR-1	2
IS15_IS6_unknown-mphA	IS15_IS6_unknown	mphA	200
IS15_IS6_unknown-OXA-10	IS15_IS6_unknown	OXA-10	19
IS15_IS6_unknown-QnrS1	IS15_IS6_unknown	QnrS1	115
IS15_IS6_unknown-TEM-1	IS15_IS6_unknown	TEM-1	66
IS15_IS6_unknown-tetM	IS15_IS6_unknown	tetM	7
IS1541A_IS200/IS605_IS200-tolC	IS1541A_IS200/IS605_IS200	tolC	3
IS15DI_IS6_unknown-APH(3')-Ia	IS15DI_IS6_unknown	APH(3')-Ia	2
IS15DI_IS6_unknown-mphA	IS15DI_IS6_unknown	mphA	3
IS15DI_IS6_unknown-OXA-10	IS15DI_IS6_unknown	OXA-10	3
IS15DII_IS6_unknown-APH(3')-Ia	IS15DII_IS6_unknown	APH(3')-Ia	6
IS15DII_IS6_unknown-QnrS1	IS15DII_IS6_unknown	QnrS1	3
IS15DIV_IS6_unknown-mphA	IS15DIV_IS6_unknown	mphA	5
IS1628_IS6_unknown-APH(6)-Id	IS1628_IS6_unknown	APH(6)-Id	3
IS17_IS5_IS903-APH(6)-Id	IS17_IS5_IS903	APH(6)-Id	5
IS1A_IS1_unknown-AAC(3)-IId	IS1A_IS1_unknown	AAC(3)-IId	14
IS1A_IS1_unknown-APH(3')-Ia	IS1A_IS1_unknown	APH(3')-Ia	4
IS1A_IS1_unknown-APH(6)-Id	IS1A_IS1_unknown	APH(6)-Id	30
IS1A_IS1_unknown-catB3	IS1A_IS1_unknown	catB3	2
IS1A_IS1_unknown-dfrA12	IS1A_IS1_unknown	dfrA12	2
IS1A_IS1_unknown-QnrS1	IS1A_IS1_unknown	QnrS1	2
IS1A_IS1_unknown-TEM-1	IS1A_IS1_unknown	TEM-1	31
IS1F_IS1_unknown-TEM-1	IS1F_IS1_unknown	TEM-1	5
IS1X3_IS1_unknown-TEM-1	IS1X3_IS1_unknown	TEM-1	5
IS2_IS3_IS2-MCR-1	IS2_IS3_IS2	MCR-1	4
IS200C_IS200/IS605_IS200-tolC	IS200C_IS200/IS605_IS200	tolC	4
IS256_IS256_unknown-tetM	IS256_IS256_unknown	tetM	2
IS4321_IS110_IS1111-APH(3')-Ia	IS4321_IS110_IS1111	APH(3')-Ia	3
IS4321_IS110_IS1111-APH(6)-Id	IS4321_IS110_IS1111	APH(6)-Id	7
IS4321_IS110_IS1111-floR	IS4321_IS110_IS1111	floR	6
IS4321_IS110_IS1111-mphA	IS4321_IS110_IS1111	mphA	7
IS5_IS5_IS5-AAC(3)-IId	IS5_IS5_IS5	AAC(3)-IId	2
IS50R_IS4_IS50-mphA	IS50R_IS4_IS50	mphA	4
IS5564_IS481_unknown-APH(6)-Id	IS5564_IS481_unknown	APH(6)-Id	3
IS5564_IS481_unknown-mphA	IS5564_IS481_unknown	mphA	2
IS6100_IS6_unknown-APH(3')-Ia	IS6100_IS6_unknown	APH(3')-Ia	2
IS6100_IS6_unknown-dfrA14	IS6100_IS6_unknown	dfrA14	2
IS6100_IS6_unknown-mphA	IS6100_IS6_unknown	mphA	212
IS6770_IS30_unknown-lnuA	IS6770_IS30_unknown	lnuA	15
IS6770_IS30_unknown-tet(L)	IS6770_IS30_unknown	tet(L)	3
IS679_IS66_unknown-APH(6)-Id	IS679_IS66_unknown	APH(6)-Id	2
IS903_IS5_IS903-APH(6)-Id	IS903_IS5_IS903	APH(6)-Id	2
ISAba1_IS4_IS10-APH(6)-Id	ISAba1_IS4_IS10	APH(6)-Id	4
ISAba125_IS30_unknown-APH(6)-Id	ISAba125_IS30_unknown	APH(6)-Id	3
ISAba14_IS3_IS150-AAC(3)-IId	ISAba14_IS3_IS150	AAC(3)-IId	29
ISAba14_IS3_IS150-APH(6)-Id	ISAba14_IS3_IS150	APH(6)-Id	12
ISAba18_IS3_IS51-floR	ISAba18_IS3_IS51	floR	4
ISAba19_IS3_IS51-floR	ISAba19_IS3_IS51	floR	2
ISAba3_IS1_unknown-APH(6)-Id	ISAba3_IS1_unknown	APH(6)-Id	5
ISAba8_IS21_unknown-floR	ISAba8_IS21_unknown	floR	2
ISAlw25_IS1_unknown-APH(6)-Id	ISAlw25_IS1_unknown	APH(6)-Id	5
ISApl1_IS30_unknown-catB3	ISApl1_IS30_unknown	catB3	3
ISApl1_IS30_unknown-MCR-1	ISApl1_IS30_unknown	MCR-1	14
ISBbi1_IS1595_unknown-APH(6)-Id	ISBbi1_IS1595_unknown	APH(6)-Id	2
ISC1041_IS30_unknown-APH(6)-Id	ISC1041_IS30_unknown	APH(6)-Id	3
ISCco2_IS1595_ISPna2-APH(3')-IIIa	ISCco2_IS1595_ISPna2	APH(3')-IIIa	10
ISCco2_IS1595_ISPna2-ErmB	ISCco2_IS1595_ISPna2	ErmB	34
ISCfr1_IS1182_unknown-AAC(3)-IId	ISCfr1_IS1182_unknown	AAC(3)-IId	83
ISCfr1_IS1182_unknown-TEM-1	ISCfr1_IS1182_unknown	TEM-1	3
ISCfr8_IS21_unknown-AAC(6')-Ib7	ISCfr8_IS21_unknown	AAC(6')-Ib7	2
ISEc27_IS3_IS2-MCR-1	ISEc27_IS3_IS2	MCR-1	3
ISEc41_IS200/IS605_IS605-bacA	ISEc41_IS200/IS605_IS605	bacA	5
ISEc57_IS21_unknown-floR	ISEc57_IS21_unknown	floR	3
ISEc59_IS6_unknown-APH(3')-Ia	ISEc59_IS6_unknown	APH(3')-Ia	35
ISEc59_IS6_unknown-APH(6)-Id	ISEc59_IS6_unknown	APH(6)-Id	5
ISEc9_IS1380_unknown-APH(3')-IIIa	ISEc9_IS1380_unknown	APH(3')-IIIa	7
ISEc9_IS1380_unknown-APH(6)-Id	ISEc9_IS1380_unknown	APH(6)-Id	14
ISEc9_IS1380_unknown-TEM-1	ISEc9_IS1380_unknown	TEM-1	25
ISEfa4_IS200/IS605_IS605-tet(L)	ISEfa4_IS200/IS605_IS605	tet(L)	2
ISEnca1_IS1380_unknown-APH(3')-IIIa	ISEnca1_IS1380_unknown	APH(3')-IIIa	90
ISEnca1_IS1380_unknown-ErmB	ISEnca1_IS1380_unknown	ErmB	2
ISKpn19_ISKra4_ISAzba1-QnrS1	ISKpn19_ISKra4_ISAzba1	QnrS1	152
ISLac1_IS1182_unknown-ErmT	ISLac1_IS1182_unknown	ErmT	8
ISLac1_IS1182_unknown-lnuA	ISLac1_IS1182_unknown	lnuA	3
ISLac1_IS1182_unknown-tet(L)	ISLac1_IS1182_unknown	tet(L)	24
ISLac1_IS1182_unknown-tetM	ISLac1_IS1182_unknown	tetM	2
ISLgar4_IS6_unknown-APH(3')-IIIa	ISLgar4_IS6_unknown	APH(3')-IIIa	3
ISLhe30_IS30_unknown-tet(L)	ISLhe30_IS30_unknown	tet(L)	2
ISLhe63_IS1182_unknown-ErmT	ISLhe63_IS1182_unknown	ErmT	36
ISLhe63_IS1182_unknown-lnuA	ISLhe63_IS1182_unknown	lnuA	4
ISLjo2_ISL3_unknown-ErmB	ISLjo2_ISL3_unknown	ErmB	4
ISLpl1_IS30_unknown-tetM	ISLpl1_IS30_unknown	tetM	6
ISLre2_ISLre2_unknown-ErmT	ISLre2_ISLre2_unknown	ErmT	3
ISPa25_IS110_IS1111-OXA-10	ISPa25_IS110_IS1111	OXA-10	11
ISPlu13_IS110_unknown-APH(3')-Ia	ISPlu13_IS110_unknown	APH(3')-Ia	3
ISPlu13_IS110_unknown-APH(6)-Id	ISPlu13_IS110_unknown	APH(6)-Id	7
ISPlu13_IS110_unknown-floR	ISPlu13_IS110_unknown	floR	2
ISPlu13_IS110_unknown-mphA	ISPlu13_IS110_unknown	mphA	7
ISPsp5_IS1182_unknown-AAC(3)-IId	ISPsp5_IS1182_unknown	AAC(3)-IId	26
ISPsp5_IS1182_unknown-TEM-1	ISPsp5_IS1182_unknown	TEM-1	3
ISPssp4_IS256_unknown-ErmT	ISPssp4_IS256_unknown	ErmT	2
ISSag10_IS1595_ISPna2-APH(3')-IIIa	ISSag10_IS1595_ISPna2	APH(3')-IIIa	2
ISSag12_IS3_IS150-APH(3')-IIIa	ISSag12_IS3_IS150	APH(3')-IIIa	2
ISSbo1_IS91_unknown-mphA	ISSbo1_IS91_unknown	mphA	4
ISSwo1_IS3_IS150-APH(3')-IIIa	ISSwo1_IS3_IS150	APH(3')-IIIa	2
ISVsa3_IS91_unknown-APH(3')-Ia	ISVsa3_IS91_unknown	APH(3')-Ia	2
ISVsa3_IS91_unknown-APH(6)-Id	ISVsa3_IS91_unknown	APH(6)-Id	2
ISVsa3_IS91_unknown-floR	ISVsa3_IS91_unknown	floR	154
IS1006_IS6_unknown-tet(A)	IS1006_IS6_unknown	tet(A)	2
IS102_IS5_IS903-APH(3'')-Ib	IS102_IS5_IS903	APH(3'')-Ib	42
IS102_IS5_IS903-CTX-M-90	IS102_IS5_IS903	CTX-M-90	5
IS102_IS5_IS903-FosA3	IS102_IS5_IS903	FosA3	4
IS102_IS5_IS903-kdpE	IS102_IS5_IS903	kdpE	3
IS102_IS5_IS903-MCR-9	IS102_IS5_IS903	MCR-9	3
IS102_IS5_IS903-sul2	IS102_IS5_IS903	sul2	3
IS103_IS3_IS150-mdtA	IS103_IS3_IS150	mdtA	2
IS103_IS3_IS150-mdtB	IS103_IS3_IS150	mdtB	2
IS1062_IS30_unknown-poxtA	IS1062_IS30_unknown	poxtA	85
IS10R_IS4_IS10-APH(3'')-Ib	IS10R_IS4_IS10	APH(3'')-Ib	2
IS1133_IS3_IS3-APH(3'')-Ib	IS1133_IS3_IS3	APH(3'')-Ib	70
IS1133_IS3_IS3-APH(3')-IIa	IS1133_IS3_IS3	APH(3')-IIa	2
IS1133_IS3_IS3-tet(A)	IS1133_IS3_IS3	tet(A)	7
IS1163_IS3_IS3-ANT(6)-Ia	IS1163_IS3_IS3	ANT(6)-Ia	7
IS1169_IS5_IS5-ErmF	IS1169_IS5_IS5	ErmF	2
IS1187_IS982_unknown-ErmF	IS1187_IS982_unknown	ErmF	7
IS1188_IS1380_unknown-ErmF	IS1188_IS1380_unknown	ErmF	2
IS1194_IS5_IS5-mel	IS1194_IS5_IS5	mel	3
IS1203_IS3_IS51-APH(3')-IIa	IS1203_IS3_IS51	APH(3')-IIa	2
IS1203_IS3_IS51-Escherichia_coli_ampH	IS1203_IS3_IS51	Escherichia_coli_ampH	5
IS1203_IS3_IS51-ugd	IS1203_IS3_IS51	ugd	2
IS1216_IS6_unknown-AAC(6')-Ie-APH(2'')-Ia	IS1216_IS6_unknown	AAC(6')-Ie-APH(2'')-Ia	5
IS1216_IS6_unknown-dfrG	IS1216_IS6_unknown	dfrG	7
IS1216_IS6_unknown-fexA	IS1216_IS6_unknown	fexA	49
IS1216_IS6_unknown-Lactobacillus_reuteri_cat-TC	IS1216_IS6_unknown	Lactobacillus_reuteri_cat-TC	4
IS1216_IS6_unknown-lsaE	IS1216_IS6_unknown	lsaE	4
IS1216_IS6_unknown-poxtA	IS1216_IS6_unknown	poxtA	241
IS1216_IS6_unknown-SAT-4	IS1216_IS6_unknown	SAT-4	3
IS1216_IS6_unknown-tetO	IS1216_IS6_unknown	tetO	8
IS1216_IS6_unknown-tetW	IS1216_IS6_unknown	tetW	2
IS1216_IS6_unknown-vatE	IS1216_IS6_unknown	vatE	3
IS1216E_IS6_unknown-fexA	IS1216E_IS6_unknown	fexA	2
IS1216E_IS6_unknown-Lactobacillus_reuteri_cat-TC	IS1216E_IS6_unknown	Lactobacillus_reuteri_cat-TC	6
IS1216E_IS6_unknown-poxtA	IS1216E_IS6_unknown	poxtA	6
IS1216V_IS6_unknown-poxtA	IS1216V_IS6_unknown	poxtA	7
IS1247_IS1380_unknown-sul2	IS1247_IS1380_unknown	sul2	2
IS1249_IS256_IS1249-tetW	IS1249_IS256_IS1249	tetW	4
IS1252_IS30_unknown-poxtA	IS1252_IS30_unknown	poxtA	89
IS1294_IS91_unknown-AAC(3)-IV	IS1294_IS91_unknown	AAC(3)-IV	2
IS1294_IS91_unknown-APH(3')-IIa	IS1294_IS91_unknown	APH(3')-IIa	163
IS1297_IS6_unknown-poxtA	IS1297_IS6_unknown	poxtA	2
IS1310_IS256_unknown-vatE	IS1310_IS256_unknown	vatE	5
IS1397_IS3_IS150-mdtO	IS1397_IS3_IS150	mdtO	2
IS1397_IS3_IS150-mdtP	IS1397_IS3_IS150	mdtP	3
IS1397_IS3_IS150-ugd	IS1397_IS3_IS150	ugd	4
IS1416_IS3_IS51-sul2	IS1416_IS3_IS51	sul2	3
IS15_IS6_unknown-AAC(3)-IV	IS15_IS6_unknown	AAC(3)-IV	230
IS15_IS6_unknown-aadA2	IS15_IS6_unknown	aadA2	22
IS15_IS6_unknown-ANT(3'')-IIa	IS15_IS6_unknown	ANT(3'')-IIa	6
IS15_IS6_unknown-APH(3'')-Ib	IS15_IS6_unknown	APH(3'')-Ib	21
IS15_IS6_unknown-APH(3')-IIa	IS15_IS6_unknown	APH(3')-IIa	173
IS15_IS6_unknown-FosA3	IS15_IS6_unknown	FosA3	220
IS15_IS6_unknown-FosA4	IS15_IS6_unknown	FosA4	4
IS15_IS6_unknown-qacH	IS15_IS6_unknown	qacH	118
IS15_IS6_unknown-sul2	IS15_IS6_unknown	sul2	10
IS15_IS6_unknown-tet(A)	IS15_IS6_unknown	tet(A)	8
IS1541A_IS200/IS605_IS200-H-NS	IS1541A_IS200/IS605_IS200	H-NS	5
IS1541A_IS200/IS605_IS200-kdpE	IS1541A_IS200/IS605_IS200	kdpE	5
IS1541D_IS200/IS605_IS200-ugd	IS1541D_IS200/IS605_IS200	ugd	2
IS1542_IS256_unknown-AAC(6')-Ie-APH(2'')-Ia	IS1542_IS256_unknown	AAC(6')-Ie-APH(2'')-Ia	2
IS1542_IS256_unknown-ANT(6)-Ia	IS1542_IS256_unknown	ANT(6)-Ia	3
IS15DI_IS6_unknown-APH(3')-IIa	IS15DI_IS6_unknown	APH(3')-IIa	3
IS15DI_IS6_unknown-FosA3	IS15DI_IS6_unknown	FosA3	5
IS15DII_IS6_unknown-FosA3	IS15DII_IS6_unknown	FosA3	56
IS15DIV_IS6_unknown-APH(3')-IIa	IS15DIV_IS6_unknown	APH(3')-IIa	8
IS15DIV_IS6_unknown-FosA3	IS15DIV_IS6_unknown	FosA3	13
IS1628_IS6_unknown-APH(3'')-Ib	IS1628_IS6_unknown	APH(3'')-Ib	3
IS17_IS5_IS903-APH(3'')-Ib	IS17_IS5_IS903	APH(3'')-Ib	5
IS17_IS5_IS903-sul2	IS17_IS5_IS903	sul2	4
IS199_IS3_IS150-mel	IS199_IS3_IS150	mel	7
IS1A_IS1_unknown-aadA2	IS1A_IS1_unknown	aadA2	7
IS1A_IS1_unknown-acrE	IS1A_IS1_unknown	acrE	5
IS1A_IS1_unknown-acrS	IS1A_IS1_unknown	acrS	6
IS1A_IS1_unknown-ANT(3'')-IIa	IS1A_IS1_unknown	ANT(3'')-IIa	5
IS1A_IS1_unknown-APH(3'')-Ib	IS1A_IS1_unknown	APH(3'')-Ib	34
IS1A_IS1_unknown-baeR	IS1A_IS1_unknown	baeR	2
IS1A_IS1_unknown-emrK	IS1A_IS1_unknown	emrK	5
IS1A_IS1_unknown-emrY	IS1A_IS1_unknown	emrY	4
IS1A_IS1_unknown-Escherichia_coli_ampC	IS1A_IS1_unknown	Escherichia_coli_ampC	3
IS1A_IS1_unknown-Escherichia_coli_ampH	IS1A_IS1_unknown	Escherichia_coli_ampH	6
IS1A_IS1_unknown-Escherichia_coli_emrE	IS1A_IS1_unknown	Escherichia_coli_emrE	6
IS1A_IS1_unknown-evgA	IS1A_IS1_unknown	evgA	5
IS1A_IS1_unknown-evgS	IS1A_IS1_unknown	evgS	3
IS1A_IS1_unknown-gadW	IS1A_IS1_unknown	gadW	5
IS1A_IS1_unknown-mdtF	IS1A_IS1_unknown	mdtF	5
IS1A_IS1_unknown-mdtH	IS1A_IS1_unknown	mdtH	8
IS1A_IS1_unknown-mdtM	IS1A_IS1_unknown	mdtM	4
IS1A_IS1_unknown-tet(A)	IS1A_IS1_unknown	tet(A)	3
IS1A_IS1_unknown-ugd	IS1A_IS1_unknown	ugd	8
IS1F_IS1_unknown-marA	IS1F_IS1_unknown	marA	4
IS1F_IS1_unknown-mdtM	IS1F_IS1_unknown	mdtM	11
IS1H_IS1_unknown-sul2	IS1H_IS1_unknown	sul2	2
IS2_IS3_IS2-Escherichia_coli_ampH	IS2_IS3_IS2	Escherichia_coli_ampH	13
IS2_IS3_IS2-Escherichia_coli_emrE	IS2_IS3_IS2	Escherichia_coli_emrE	5
IS2_IS3_IS2-marA	IS2_IS3_IS2	marA	3
IS2_IS3_IS2-mdtM	IS2_IS3_IS2	mdtM	6
IS200_IS200/IS605_IS200-H-NS	IS200_IS200/IS605_IS200	H-NS	5
IS200_IS200/IS605_IS200-kdpE	IS200_IS200/IS605_IS200	kdpE	5
IS200_IS200/IS605_IS200-ugd	IS200_IS200/IS605_IS200	ugd	6
IS200C_IS200/IS605_IS200-H-NS	IS200C_IS200/IS605_IS200	H-NS	4
IS200C_IS200/IS605_IS200-ugd	IS200C_IS200/IS605_IS200	ugd	8
IS200F_IS200/IS605_IS200-ugd	IS200F_IS200/IS605_IS200	ugd	2
IS256_IS256_unknown-AAC(6')-Ie-APH(2'')-Ia	IS256_IS256_unknown	AAC(6')-Ie-APH(2'')-Ia	85
IS256_IS256_unknown-ANT(6)-Ia	IS256_IS256_unknown	ANT(6)-Ia	28
IS256_IS256_unknown-ANT(6)-Ib	IS256_IS256_unknown	ANT(6)-Ib	2
IS256_IS256_unknown-Lactobacillus_reuteri_cat-TC	IS256_IS256_unknown	Lactobacillus_reuteri_cat-TC	6
IS256_IS256_unknown-poxtA	IS256_IS256_unknown	poxtA	2
IS256_IS256_unknown-tet44	IS256_IS256_unknown	tet44	4
IS3_IS3_IS3-acrD	IS3_IS3_IS3	acrD	2
IS3_IS3_IS3-Escherichia_coli_emrE	IS3_IS3_IS3	Escherichia_coli_emrE	9
IS30_IS30_unknown-Escherichia_coli_acrA	IS30_IS30_unknown	Escherichia_coli_acrA	3
IS3503_IS256_IS1249-tetW	IS3503_IS256_IS1249	tetW	4
IS4_IS4_IS4-H-NS	IS4_IS4_IS4	H-NS	32
IS4321_IS110_IS1111-APH(3'')-Ib	IS4321_IS110_IS1111	APH(3'')-Ib	7
IS4321_IS110_IS1111-sul2	IS4321_IS110_IS1111	sul2	16
IS4321_IS110_IS1111-tet(A)	IS4321_IS110_IS1111	tet(A)	5
IS4351_IS30_unknown-ErmF	IS4351_IS30_unknown	ErmF	14
IS4351_IS30_unknown-tetQ	IS4351_IS30_unknown	tetQ	2
IS5_IS5_IS5-armA	IS5_IS5_IS5	armA	40
IS5_IS5_IS5-Escherichia_coli_ampC	IS5_IS5_IS5	Escherichia_coli_ampC	3
IS50R_IS4_IS50-APH(3')-IIa	IS50R_IS4_IS50	APH(3')-IIa	184
IS5564_IS481_unknown-APH(3'')-Ib	IS5564_IS481_unknown	APH(3'')-Ib	3
IS600_IS3_IS3-mdtM	IS600_IS3_IS3	mdtM	2
IS609_IS200/IS605_IS605-Escherichia_coli_emrE	IS609_IS200/IS605_IS605	Escherichia_coli_emrE	90
IS6100_IS6_unknown-aadA2	IS6100_IS6_unknown	aadA2	3
IS6100_IS6_unknown-ANT(3'')-IIa	IS6100_IS6_unknown	ANT(3'')-IIa	3
IS6100_IS6_unknown-APH(3')-IIa	IS6100_IS6_unknown	APH(3')-IIa	4
IS612_IS1380_IS942-mel	IS612_IS1380_IS942	mel	39
IS612_IS1380_IS942-sul2	IS612_IS1380_IS942	sul2	3
IS612B_IS1380_IS942-aadS	IS612B_IS1380_IS942	aadS	2
IS612B_IS1380_IS942-ErmF	IS612B_IS1380_IS942	ErmF	2
IS612B_IS1380_IS942-ErmG	IS612B_IS1380_IS942	ErmG	2
IS612B_IS1380_IS942-mel	IS612B_IS1380_IS942	mel	63
IS613_IS1380_IS942-aadS	IS613_IS1380_IS942	aadS	17
IS613_IS1380_IS942-ErmF	IS613_IS1380_IS942	ErmF	93
IS613_IS1380_IS942-tetQ	IS613_IS1380_IS942	tetQ	3
IS614_IS1380_IS942-ErmF	IS614_IS1380_IS942	ErmF	21
IS614_IS1380_IS942-mel	IS614_IS1380_IS942	mel	8
IS614B_IS1380_IS942-mel	IS614B_IS1380_IS942	mel	4
IS621_IS110_unknown-cpxA	IS621_IS110_unknown	cpxA	7
IS621_IS110_unknown-Escherichia_coli_acrA	IS621_IS110_unknown	Escherichia_coli_acrA	121
IS621_IS110_unknown-Escherichia_coli_ampC	IS621_IS110_unknown	Escherichia_coli_ampC	59
IS621_IS110_unknown-Escherichia_coli_ampC1_beta-lactamase	IS621_IS110_unknown	Escherichia_coli_ampC1_beta-lactamase	58
IS621_IS110_unknown-kdpE	IS621_IS110_unknown	kdpE	5
IS6770_IS30_unknown-ANT(4')-Ib	IS6770_IS30_unknown	ANT(4')-Ib	2
IS6770_IS30_unknown-poxtA	IS6770_IS30_unknown	poxtA	3
IS679_IS66_unknown-APH(3'')-Ib	IS679_IS66_unknown	APH(3'')-Ib	2
IS682_IS66_unknown-sul2	IS682_IS66_unknown	sul2	3
IS903_IS5_IS903-APH(3'')-Ib	IS903_IS5_IS903	APH(3'')-Ib	2
IS903_IS5_IS903-FosA3	IS903_IS5_IS903	FosA3	12
IS91_IS91_unknown-APH(3')-IIa	IS91_IS91_unknown	APH(3')-IIa	3
IS942_IS1380_IS942-mel	IS942_IS1380_IS942	mel	3
ISAba1_IS4_IS10-AAC(3)-IV	ISAba1_IS4_IS10	AAC(3)-IV	16
ISAba1_IS4_IS10-APH(3'')-Ib	ISAba1_IS4_IS10	APH(3'')-Ib	4
ISAba1_IS4_IS10-sul2	ISAba1_IS4_IS10	sul2	80
ISAba125_IS30_unknown-APH(3'')-Ib	ISAba125_IS30_unknown	APH(3'')-Ib	3
ISAba14_IS3_IS150-APH(3'')-Ib	ISAba14_IS3_IS150	APH(3'')-Ib	14
ISAba18_IS3_IS51-sul2	ISAba18_IS3_IS51	sul2	8
ISAba19_IS3_IS51-sul2	ISAba19_IS3_IS51	sul2	4
ISAba3_IS1_unknown-APH(3'')-Ib	ISAba3_IS1_unknown	APH(3'')-Ib	6
ISAlw25_IS1_unknown-APH(3'')-Ib	ISAlw25_IS1_unknown	APH(3'')-Ib	6
ISApl1_IS30_unknown-kdpE	ISApl1_IS30_unknown	kdpE	2
ISBaov1_IS1380_IS942-mel	ISBaov1_IS1380_IS942	mel	4
ISBaov1_IS1380_IS942-sul2	ISBaov1_IS1380_IS942	sul2	2
ISBbi1_IS1595_unknown-aadS	ISBbi1_IS1595_unknown	aadS	3
ISBbi1_IS1595_unknown-APH(3'')-Ib	ISBbi1_IS1595_unknown	APH(3'')-Ib	4
ISBbi1_IS1595_unknown-ErmF	ISBbi1_IS1595_unknown	ErmF	13
ISBbi1_IS1595_unknown-sul2	ISBbi1_IS1595_unknown	sul2	26
ISBf11_IS1380_IS942-mel	ISBf11_IS1380_IS942	mel	16
ISBf12_IS1380_IS942-ErmF	ISBf12_IS1380_IS942	ErmF	4
ISBf12_IS1380_IS942-mel	ISBf12_IS1380_IS942	mel	18
ISBf5_IS1182_unknown-ErmF	ISBf5_IS1182_unknown	ErmF	7
ISBf7_IS1380_IS942-mel	ISBf7_IS1380_IS942	mel	9
ISBsp3_IS3_IS150-Campylobacter_coli_chloramphenicol_acetyltransferase	ISBsp3_IS3_IS150	Campylobacter_coli_chloramphenicol_acetyltransferase	3
ISC1041_IS30_unknown-APH(3'')-Ib	ISC1041_IS30_unknown	APH(3'')-Ib	3
ISCco2_IS1595_ISPna2-AAC(6')-Ie-APH(2'')-Ia	ISCco2_IS1595_ISPna2	AAC(6')-Ie-APH(2'')-Ia	2
ISCco2_IS1595_ISPna2-ANT(6)-Ib	ISCco2_IS1595_ISPna2	ANT(6)-Ib	2
ISCco2_IS1595_ISPna2-Campylobacter_coli_chloramphenicol_acetyltransferase	ISCco2_IS1595_ISPna2	Campylobacter_coli_chloramphenicol_acetyltransferase	17
ISCco2_IS1595_ISPna2-ErmG	ISCco2_IS1595_ISPna2	ErmG	2
ISCco2_IS1595_ISPna2-Lactobacillus_reuteri_cat-TC	ISCco2_IS1595_ISPna2	Lactobacillus_reuteri_cat-TC	2
ISCco2_IS1595_ISPna2-lnuC	ISCco2_IS1595_ISPna2	lnuC	267
ISCco2_IS1595_ISPna2-mel	ISCco2_IS1595_ISPna2	mel	2
ISCco2_IS1595_ISPna2-npmA	ISCco2_IS1595_ISPna2	npmA	6
ISCco2_IS1595_ISPna2-vatE	ISCco2_IS1595_ISPna2	vatE	2
ISCfr6_IS3_IS3-ugd	ISCfr6_IS3_IS3	ugd	3
ISCro3_IS4_unknown-H-NS	ISCro3_IS4_unknown	H-NS	64
ISCro3_IS4_unknown-ugd	ISCro3_IS4_unknown	ugd	3
ISCur2_IS256_IS1249-tetW	ISCur2_IS256_IS1249	tetW	4
ISDha13_IS200/IS605_IS200-tet32	ISDha13_IS200/IS605_IS200	tet32	3
ISEc18_IS481_unknown-ugd	ISEc18_IS481_unknown	ugd	4
ISEc21_IS110_unknown-ugd	ISEc21_IS110_unknown	ugd	2
ISEc23_IS66_unknown-mdtM	ISEc23_IS66_unknown	mdtM	6
ISEc23_IS66_unknown-msbA	ISEc23_IS66_unknown	msbA	7
ISEc27_IS3_IS2-Escherichia_coli_ampH	ISEc27_IS3_IS2	Escherichia_coli_ampH	3
ISEc27_IS3_IS2-mdtM	ISEc27_IS3_IS2	mdtM	4
ISEc28_IS5_IS903-armA	ISEc28_IS5_IS903	armA	36
ISEc29_IS4_IS10-armA	ISEc29_IS4_IS10	armA	40
ISEc44_IS200/IS605_IS605-Escherichia_coli_emrE	ISEc44_IS200/IS605_IS605	Escherichia_coli_emrE	6
ISEc59_IS6_unknown-AAC(3)-IV	ISEc59_IS6_unknown	AAC(3)-IV	222
ISEc59_IS6_unknown-APH(3'')-Ib	ISEc59_IS6_unknown	APH(3'')-Ib	5
ISEc59_IS6_unknown-sul2	ISEc59_IS6_unknown	sul2	12
ISEc59_IS6_unknown-tet(A)	ISEc59_IS6_unknown	tet(A)	15
ISEc9_IS1380_unknown-APH(3'')-Ib	ISEc9_IS1380_unknown	APH(3'')-Ib	15
ISEc9_IS1380_unknown-CTX-M-90	ISEc9_IS1380_unknown	CTX-M-90	6
ISEc9_IS1380_unknown-FosA3	ISEc9_IS1380_unknown	FosA3	4
ISEnfa110_IS110_unknown-ErmG	ISEnfa110_IS110_unknown	ErmG	3
ISEnfa110_IS110_unknown-tet(40)	ISEnfa110_IS110_unknown	tet(40)	2
ISKpn12_IS5_IS427-TEM-2	ISKpn12_IS5_IS427	TEM-2	3
ISKpn19_ISKra4_ISAzba1-tet(A)	ISKpn19_ISKra4_ISAzba1	tet(A)	14
ISKpn26_IS5_IS5-Escherichia_coli_ampC	ISKpn26_IS5_IS5	Escherichia_coli_ampC	2
ISKpn26_IS5_IS5-Escherichia_coli_emrE	ISKpn26_IS5_IS5	Escherichia_coli_emrE	9
ISKpn37_IS3_IS3-ugd	ISKpn37_IS3_IS3	ugd	3
ISLac1_IS1182_unknown-AAC(6')-Ie-APH(2'')-Ia	ISLac1_IS1182_unknown	AAC(6')-Ie-APH(2'')-Ia	4
ISLac1_IS1182_unknown-Lactobacillus_reuteri_cat-TC	ISLac1_IS1182_unknown	Lactobacillus_reuteri_cat-TC	4
ISLcr1_ISLre2_unknown-Lactobacillus_reuteri_cat-TC	ISLcr1_ISLre2_unknown	Lactobacillus_reuteri_cat-TC	2
ISLcr1_ISLre2_unknown-poxtA	ISLcr1_ISLre2_unknown	poxtA	2
ISLcr2_ISLre2_unknown-poxtA	ISLcr2_ISLre2_unknown	poxtA	2
ISLfr1_ISL3_unknown-vatE	ISLfr1_ISL3_unknown	vatE	2
ISLga1_IS30_unknown-vatE	ISLga1_IS30_unknown	vatE	2
ISLgar4_IS6_unknown-poxtA	ISLgar4_IS6_unknown	poxtA	32
ISLhe30_IS30_unknown-fexA	ISLhe30_IS30_unknown	fexA	7
ISLhe30_IS30_unknown-tetW	ISLhe30_IS30_unknown	tetW	2
ISLhe65_IS200/IS605_IS1341-tetW	ISLhe65_IS200/IS605_IS1341	tetW	3
ISLjo2_ISL3_unknown-vatE	ISLjo2_ISL3_unknown	vatE	3
ISLpl1_IS30_unknown-tetW	ISLpl1_IS30_unknown	tetW	3
ISPan1_IS5_IS903-kdpE	ISPan1_IS5_IS903	kdpE	3
ISPlu13_IS110_unknown-APH(3'')-Ib	ISPlu13_IS110_unknown	APH(3'')-Ib	7
ISPlu13_IS110_unknown-sul2	ISPlu13_IS110_unknown	sul2	13
ISPlu13_IS110_unknown-tet(A)	ISPlu13_IS110_unknown	tet(A)	3
ISPrst2_IS5_IS427-Escherichia_coli_emrE	ISPrst2_IS5_IS427	Escherichia_coli_emrE	5
ISPrst3_IS5_IS427-Escherichia_coli_emrE	ISPrst3_IS5_IS427	Escherichia_coli_emrE	4
ISRme14_IS481_unknown-aadA2	ISRme14_IS481_unknown	aadA2	4
ISS1W_IS6_unknown-poxtA	ISS1W_IS6_unknown	poxtA	6
ISSag10_IS1595_ISPna2-npmA	ISSag10_IS1595_ISPna2	npmA	4
ISSag2_IS3_IS150-mel	ISSag2_IS3_IS150	mel	3
ISSbo1_IS91_unknown-AAC(3)-IV	ISSbo1_IS91_unknown	AAC(3)-IV	2
ISSbo1_IS91_unknown-APH(3')-IIa	ISSbo1_IS91_unknown	APH(3')-IIa	39
ISSen6_IS200/IS605_IS605-Escherichia_coli_emrE	ISSen6_IS200/IS605_IS605	Escherichia_coli_emrE	3
ISSf1_IS5_IS1031-Escherichia_coli_emrE	ISSf1_IS5_IS1031	Escherichia_coli_emrE	4
ISShdy2_IS66_unknown-mdtM	ISShdy2_IS66_unknown	mdtM	3
ISSsu3_IS630_unknown-ANT(6)-Ia	ISSsu3_IS630_unknown	ANT(6)-Ia	2
ISSsu5_IS1380_unknown-AAC(6')-Ie-APH(2'')-Ia	ISSsu5_IS1380_unknown	AAC(6')-Ie-APH(2'')-Ia	32
ISSsu5_IS1380_unknown-ANT(6)-Ia	ISSsu5_IS1380_unknown	ANT(6)-Ia	36
ISVsa3_IS91_unknown-APH(3'')-Ib	ISVsa3_IS91_unknown	APH(3'')-Ib	2
ISVsa3_IS91_unknown-sul2	ISVsa3_IS91_unknown	sul2	44
ISVsa3_IS91_unknown-tet(A)	ISVsa3_IS91_unknown	tet(A)	4
ISWz1_IS91_unknown-aadS	ISWz1_IS91_unknown	aadS	2
MITEEc1_IS630_unknown-kdpE	MITEEc1_IS630_unknown	kdpE	14
MITEEc1_IS630_unknown-mdtM	MITEEc1_IS630_unknown	mdtM	3
