# Supplementary material for: Machine learning and metagenomics enhance surveillance of antimicrobial resistance in chicken production in China
Source: Research Square preprint supplement (doi:10.21203/rs.3.rs-2458989/v1), 2023-01-13
Supplement: Supplementary file 11 [file f6fdf82643bd49e5cf22f44f.xlsx]

## Sheet: Sheet1
		Farm
Source	Timepoint	Henan 1	Henan 2	Henan 3	Liaoning 1	Liaoning 2	Liaoning 3	Shandong 1_1	Shandong 1_2	Shandong 2	Shandong 3	Shandong 4	Total
Chicken Faeces	t1	8	8	12	12	8	10	16	12	15	8	7	116
	t2	8	8	12	12	8	8	20	8	7	8	8	107
Chicken Feather	t1	0	5	4	0	0	0	0	0	3	0	5	17
	t2	0	5	5	0	0	0	0	0	4	0	5	19
Chicken Carcass	t3	6	8	11	4	0	6	20	12	19	0	8	94
Barn Floor	t1	0	0	0	1	3	3	0	0	0	0	3	10
	t2	0	0	2	2	1	3	0	0	0	2	3	13
Soil	t1	2	2	2	3	3	2	4	2	2	1	2	25
	t2	2	2	2	3	3	2	4	2	2	3	2	27
Wastewater	t3	3	3	4	0	0	3	0	0	3	3	2	21
Processing line	t3	0	3	3	0	0	3	0	0	0	0	3	12
Total		29	44	57	37	26	40	64	36	55	25	48	461
